# Supplementary material for: The long non-coding RNA HOTAIRM1 promotes tumor aggressiveness and radiotherapy resistance in glioblastoma
Source: PubMed Central journal article supplement (PMC8478910; doi:10.1038/s41419-021-04146-0), 2021-09-28
Supplement: 41419_2021_4146_MOESM13_ESM.pdf [file 41419_2021_4146_MOESM13_ESM.pdf]

**Supplementary Table 2. RNA sequencing results of transient *HOTAIRMI* knockdown cells**

Data supplied as Log2 Expression (counts per million (CPM))

| ID          | LN-229_HOTAIRMI_KD | LN-229_control | T98G_HOTAIRMI_KD | T98G_control | U251_HOTAIRMI_KD | U251_control |
|-------------|--------------------|----------------|------------------|--------------|------------------|--------------|
| 7SK         | 0.258567           | 0.904172       | 0.292852         | 0.893036     | 0.162983         | 0.997336     |
| A1BG        | 0.284893           | 0.292817       | 0.826729         | 1.00625      | -0.537043        | -0.0313164   |
| A1BG-AS1    | 2.04126            | 1.82705        | 2.52612          | 2.54638      | 1.17327          | 0.49135      |
| A2M         | 5.47746            | 4.16997        | 3.18932          | 3.29419      | -0.659408        | -0.963819    |
| A4GALT      | -0.323873          | -0.508459      | 0.623914         | 1.25754      | 3.27632          | 3.16981      |
| AAAS        | 4.27533            | 4.17105        | 3.48182          | 3.62249      | 3.55886          | 3.40443      |
| AACS        | 4.06828            | 3.72203        | 4.35951          | 4.46954      | 3.90764          | 3.58791      |
| AADAT       | 2.8459             | 3.25484        | -0.723865        | -0.899117    | 1.58765          | 1.33772      |
| AAED1       | 2.7542             | 2.82948        | 2.39014          | 3.02046      | 2.67732          | 3.05151      |
| AAGAB       | 4.26454            | 4.3605         | 4.45943          | 4.89469      | 4.92934          | 5.47629      |
| AAK1        | 5.40682            | 5.27524        | 5.78694          | 5.78333      | 5.90312          | 5.49356      |
| AAMDC       | 1.72345            | 1.7385         | 1.4137           | 1.7175       | 0.531539         | 0.463298     |
| AAMP        | 5.26778            | 5.27904        | 5.1513           | 5.74448      | 5.86888          | 6.02501      |
| AAR2        | 4.85072            | 4.80158        | 4.33314          | 4.71133      | 4.28071          | 4.44557      |
| AARS        | 6.10666            | 6.1569         | 6.31457          | 6.87933      | 6.72716          | 6.79584      |
| AARS2       | 3.87588            | 3.68548        | 3.23997          | 3.42563      | 3.55332          | 3.48241      |
| AARSD1      | 3.28753            | 3.29996        | 2.92814          | 3.20899      | 3.24403          | 3.36168      |
| AASDH       | 3.24783            | 3.18281        | 2.57471          | 2.81599      | 4.4945           | 4.97803      |
| AASDHPPT    | 3.25368            | 3.5214         | 4.84706          | 5.21939      | 4.81462          | 5.39405      |
| AASS        | 4.16356            | 3.80159        | 4.35949          | 4.29286      | 4.40105          | 3.97452      |
| AATF        | 5.23719            | 5.23108        | 4.42288          | 4.80106      | 5.14139          | 5.07382      |
| AB019441.29 | 4.52648            | 4.66211        | 4.54615          | 4.84165      | 5.2543           | 5.59255      |
| ABALON      | 1.53313            | 1.69165        | 1.42058          | 1.70725      | 0.96691          | 1.43906      |
| ABAT        | 2.60047            | 2.39103        | -2.37543         | -1.93836     | -2.65941         | -3.70484     |
| ABCA1       | 5.02201            | 4.62063        | 3.39391          | 3.50036      | 7.2323           | 6.90338      |
| ABCA11P     | 1.96504            | 2.00911        | 1.89689          | 2.00285      | 2.09747          | 2.07023      |
| ABCA13      | 1.28396            | 1.06077        | 0.386425         | 1.03078      | 7.80722          | 7.54489      |
| ABCA2       | 3.45194            | 3.32015        | 4.00011          | 3.82486      | 2.23755          | 2.02123      |
| ABCA5       | 3.84288            | 4.04374        | 3.24484          | 3.27478      | 3.75045          | 4.03562      |
| ABCA7       | 0.409538           | -0.440295      | 2.41268          | 2.25314      | 2.76806          | 2.2933       |
| ABCB1       | 1.60373            | 1.97427        | -3.18222         | -2.30078     | -6.64581 ?       |              |
| ABCB10      | 4.49049            | 4.49342        | 4.17714          | 4.26612      | 3.88739          | 3.84943      |
| ABCB4       | 1.62837            | 1.18401        | -1.42826         | -0.938639    | 1.1211           | 0.463298     |
| ABCB6       | 4.06305            | 4.00865        | 5.02263          | 5.16561      | 5.36938          | 4.65047      |
| ABCB7       | 3.54766            | 3.71083        | 3.29626          | 3.73509      | 4.4051           | 4.70797      |
| ABCB8       | 3.5649             | 3.40825        | 4.05979          | 4.08386      | 3.21166          | 3.46439      |
| ABCB9       | 4.03256            | 3.88858        | 1.47119          | 1.97443      | 3.47544          | 3.62946      |
| ABCC1       | 5.26741            | 4.99143        | 7.86877          | 7.80319      | 6.15826          | 5.54475      |
| ABCC10      | 3.02031            | 2.89251        | 3.04289          | 2.96532      | 3.77327          | 3.68989      |
| ABCC2       | 0.289705           | -0.177294      | 3.76338          | 3.56713      | 6.64659          | 6.91191      |
| ABCC3       | 4.25947            | 4.52298        | 6.78242          | 6.66038      | 5.53074          | 5.62308      |

|            |           |           |           |            |            |            |
|------------|-----------|-----------|-----------|------------|------------|------------|
| ABCC4      | 4.31352   | 4.60458   | 6.35996   | 6.47635    | 4.93213    | 5.47256    |
| ABCC5      | 4.92753   | 4.86582   | 5.14739   | 5.04914    | 5.07143    | 4.57753    |
| ABCD1      | 1.15272   | 1.17383   | 2.1019    | 2.3424     | 2.92278    | 2.75273    |
| ABCD3      | 5.45539   | 5.44102   | 5.69414   | 6.0272     | 5.85858    | 6.11466    |
| ABCD4      | 3.67541   | 3.44606   | 3.55507   | 3.39353    | 3.58525    | 2.98683    |
| ABCE1      | 6.11531   | 6.3495    | 5.40179   | 6.02844    | 6.15258    | 6.52703    |
| ABCF1      | 5.91999   | 5.91546   | 5.1795    | 5.46243    | 6.63907    | 6.30241    |
| ABCF2      | 6.19472   | 6.09187   | 5.55835   | 5.97387    | 6.19439    | 6.10823    |
| ABCF2P1    | 1.74485   | 1.97795   | 1.20884   | 1.71352    | 1.78078    | 0.96646    |
| ABCF3      | 4.02287   | 3.8903    | 4.59619   | 4.75147    | 5.14743    | 4.9299     |
| ABCG2      | 1.33988   | 1.8272    | 2.87989   | 3.72249    | -0.470301  | 0.80115    |
| ABHD10     | 3.5128    | 3.91327   | 3.60438   | 3.99051    | 3.30259    | 3.83051    |
| ABHD11     | 1.91933   | 1.9035    | 2.53073   | 2.97864    | 2.41919    | 2.74862    |
| ABHD12     | 5.27855   | 5.03798   | 4.50822   | 4.83807    | 4.59589    | 4.83727    |
| ABHD13     | 3.99179   | 3.6945    | 3.90393   | 3.74136    | 3.96082    | 3.59934    |
| ABHD14A    | 1.22463   | 1.35697   | 0.101166  | -0.0253444 | 1.86129    | 2.34778    |
| ABHD14B    | 4.10907   | 3.86582   | 3.6109    | 3.61227    | 4.41582    | 4.40348    |
| ABHD15     | 2.66944   | 2.36689   | 2.59763   | 2.69843    | 2.71256    | 2.52692    |
| ABHD16A    | 2.91552   | 2.69944   | 3.30626   | 3.65932    | 3.29233    | 3.57163    |
| ABHD17A    | 2.87693   | 2.37906   | 2.38116   | 2.30991    | 3.50845    | 3.41618    |
| ABHD17AP1  | -0.135825 | -0.314121 | -0.291984 | -0.525345  | 0.836789   | 0.971545   |
| ABHD17B    | 3.57588   | 3.52583   | 3.12026   | 3.18119    | 3.26747    | 3.25618    |
| ABHD17C    | 4.02883   | 3.88588   | 2.4052    | 2.71136    | 1.96907    | 2.11985    |
| ABHD2      | 6.99244   | 6.95811   | 7.03769   | 7.6279     | 6.45999    | 6.3532     |
| ABHD3      | 2.39105   | 2.65351   | 3.56299   | 4.08716    | 3.10124    | 2.77711    |
| ABHD4      | 2.42764   | 2.63256   | 2.73833   | 3.28812    | 3.11448    | 3.2677     |
| ABHD5      | 3.08638   | 3.32288   | 2.48654   | 3.29535    | 3.20232    | 3.98052    |
| ABHD6      | 3.15423   | 3.12024   | 1.82773   | 2.41475    | 2.98715    | 3.50274    |
| ABHD8      | 1.45513   | 1.35858   | 1.13784   | 1.60319    | 2.01028    | 2.17804    |
| ABI1       | 3.96652   | 3.97886   | 3.56607   | 3.84112    | 4.38455    | 4.42514    |
| ABI2       | 5.91288   | 6.02183   | 5.47171   | 5.54584    | 6.10383    | 5.99033    |
| ABI3BP     | 0.567789  | 0.559609  | 2.6109    | 1.23995    | 4.87544    | 4.68774    |
| ABL1       | 4.81758   | 4.73866   | 4.80799   | 5.08285    | 5.59264    | 4.94073    |
| ABL2       | 7.24719   | 7.11369   | 5.814     | 6.25529    | 7.12917    | 7.01373    |
| ABLIM1     | 3.78472   | 4.22277   | -1.48269  | -1.06415   | 6.32727    | 6.359      |
| ABLIM3     | 2.07243   | 2.81793   | 4.50908   | 4.73744    | 2.68177    | 2.81293    |
| ABR        | 5.95473   | 6.20275   | 4.24697   | 4.82512    | 5.2935     | 5.46002    |
| ABRACL     | 2.60471   | 2.75391   | 2.35177   | 2.61228    | 3.5637     | 3.94792    |
| ABT1       | 3.5429    | 3.16287   | 3.07858   | 3.23103    | 3.98354    | 3.95327    |
| ABTB1      | 2.49569   | 2.48554   | 1.99641   | 1.92462    | 0.197777   | 0.293394   |
| ABTB2      | 2.49322   | 2.50006   | 1.46757   | 1.6394     | 2.51712    | 2.33222    |
| AC000089.3 | 3.25557   | 3.12663   | 2.72546   | 3.04609    | 3.48723    | 3.87779    |
| AC000120.7 | 0.374055  | 0.247648  | 1.90956   | 1.61509    | 0.194591   | -1.18844   |
| AC000123.2 | 4.07075   | 3.88366   | 3.33218   | 3.21085    | 3.22539    | 2.71536    |
| AC000123.3 | 0.672688  | 0.668419  | -0.2205   | -0.32184   | -0.0822857 | -0.0902315 |
| AC002056.3 | 0.998087  | 0.860526  | 0.597584  | 1.28515    | 1.31205    | 1.28302    |
| AC002543.2 | 0.965507  | 0.884332  | 1.13842   | 1.12005    | 0.597155   | 0.223336   |
| AC002550.5 | 0.284964  | 0.590971  | -0.171409 | 0.363283   | 0.410211   | 0.889567   |
| AC004057.1 | 5.4584    | 5.4341    | 4.6911    | 5.25672    | 5.32964    | 6.0517     |
| AC004076.5 | 0.388476  | 0.107125  | 0.259532  | 0.0612232  | 0.83161    | 0.0213376  |
| AC004381.6 | 1.53356   | 1.72808   | 2.36267   | 2.63217    | 1.4321     | 1.77612    |
| AC004453.8 | 5.95397   | 5.87201   | 5.04211   | 5.39558    | 6.79839    | 7.25129    |

|             |            |            |           |           |           |            |
|-------------|------------|------------|-----------|-----------|-----------|------------|
| AC004623.3  | 0.317964   | -0.0108552 | 0.356662  | -0.127017 | 0.907244  | 0.0256525  |
| AC004893.11 | 2.23478    | 2.29978    | 2.18876   | 2.06088   | 1.49955   | 0.668981   |
| AC004951.6  | 1.83533    | 1.87866    | 2.70333   | 2.28554   | 1.96302   | 0.798192   |
| AC004980.7  | 1.93854    | 2.02005    | 2.7862    | 2.49516   | 2.39432   | 1.56553    |
| AC004987.9  | 0.29935    | 0.0249295  | 1.56203   | 1.48841   | 0.978159  | 0.42678    |
| AC005042.4  | 2.21435    | 1.94725    | 0.900807  | 0.933157  | 1.0969    | -0.0112695 |
| AC005062.2  | 4.54791    | 4.6111     | 4.31375   | 4.67479   | 4.87496   | 5.64562    |
| AC005154.6  | 3.716      | 3.55778    | 5.03459   | 4.92092   | 4.03557   | 3.47735    |
| AC005251.3  | 3.93478    | 3.99336    | 3.54326   | 3.96222   | 4.55193   | 5.61632    |
| AC005253.2  | 0.955015   | 0.890898   | 0.445462  | 0.581583  | 1.62165   | 0.904758   |
| AC005255.3  | 1.37228    | 1.45183    | 1.52722   | 2.05244   | 2.35046   | 3.01361    |
| AC005336.4  | -3.6888    | -2.37465   | 2.11571   | 2.02048   | -2.26731  | -2.00571   |
| AC005523.2  | 4.51731    | 4.27072    | 3.05477   | 3.26167   | 5.14415   | 4.70797    |
| AC005562.1  | 0.812851   | 0.512894   | 0.458655  | 1.3378    | 1.25787   | 1.36151    |
| AC005682.5  | -0.744656  | -1.14061   | 0.986462  | 0.845438  | -0.615709 | -0.619042  |
| AC005786.7  | 3.79497    | 3.55926    | 0.305865  | 0.598184  | 2.05756   | 1.74789    |
| AC005795.1  | 4.03858    | 4.21621    | 3.58327   | 4.02719   | 4.17306   | 4.29107    |
| AC005822.1  | 2.63891    | 2.80274    | 2.29281   | 2.3618    | 2.43234   | 2.44777    |
| AC006026.9  | 1.17511    | 1.85205    | 0.805705  | 1.55025   | 1.57106   | 1.5485     |
| AC006116.22 | 0.613362   | 0.705031   | 0.344283  | 0.993711  | 1.16111   | 1.12812    |
| AC006128.2  | 0.213988   | -0.13796   | 0.91947   | 0.51663   | 1.09569   | 0.0991875  |
| AC006262.5  | -6.68418 ? |            | 1.41643   | 2.68234   | -3.6585   | -1.79933   |
| AC006486.10 | 0.54893    | 0.559609   | -0.598354 | 0.158078  | 0.185296  | 0.270672   |
| AC006978.6  | 1.26675    | 1.19542    | 1.46037   | 1.39901   | 1.37315   | 1.2122     |
| AC007038.7  | 1.30097    | 1.48178    | 0.956086  | 0.605504  | 1.76178   | 1.48315    |
| AC007041.2  | 1.00522    | 1.08044    | 0.342361  | 1.11667   | 0.203477  | 0.378012   |
| AC007099.1  | 0.108397   | 0.0291348  | 1.06446   | 1.06115   | 0.679613  | 0.863209   |
| AC007191.4  | 1.67599    | 1.84446    | 1.44818   | 1.53507   | 1.85535   | 0.583452   |
| AC007192.4  | 1.62039    | 1.27813    | 1.87462   | 1.72115   | 2.67039   | 1.23469    |
| AC007229.3  | -0.334318  | -0.200066  | 0.369695  | 0.952102  | 0.388212  | 1.86218    |
| AC007238.1  | 4.80201    | 4.85167    | 4.53266   | 4.75101   | 4.97699   | 4.96692    |
| AC007246.3  | -0.744656  | -0.531913  | 0.401543  | 0.414828  | 0.732078  | 1.13883    |
| AC007256.5  | 1.34676    | 1.54185    | 1.52533   | 1.71423   | 1.70133   | 1.75914    |
| AC007318.5  | 4.84351    | 4.86264    | 4.28861   | 4.89436   | 5.49346   | 5.94882    |
| AC007362.3  | -0.549622  | -0.0702529 | -1.49199  | -0.817364 | 2.47358   | 2.08857    |
| AC007560.1  | 0.650149   | 0.289787   | 0.891061  | 0.85884   | 1.50759   | 1.67497    |
| AC007620.3  | 0.982174   | 0.203289   | 0.626159  | 1.27443   | 1.27124   | 1.56813    |
| AC007969.5  | 4.42722    | 4.42908    | 3.68956   | 4.39586   | 5.61537   | 5.9105     |
| AC008079.10 | 0.40353    | 0.370321   | 1.15105   | 0.967715  | 0.553999  | -0.807717  |
| AC008427.2  | 0.187109   | 0.371503   | 0.787407  | 1.14245   | 1.24856   | 1.07848    |
| AC008993.2  | 1.71458    | 1.59247    | 1.7234    | 1.6394    | 1.63434   | 1.25912    |
| AC009120.6  | 1.75072    | 1.77889    | 2.26316   | 2.19647   | 2.03885   | 1.81073    |
| AC009133.23 | 1.42691    | 1.36716    | 0.889232  | 0.80393   | -0.263132 | 0.328951   |
| AC009237.8  | -6.68418 ? |            | 1.89332   | 1.75539   | 3.52425   | 3.32579    |
| AC009245.3  | 2.82534    | 2.76839    | 1.86585   | 2.14556   | 2.90617   | 2.93924    |
| AC009299.5  | 2.79893    | 2.75475    | 2.35672   | 2.34672   | 3.54047   | 3.26716    |
| AC009302.2  | 2.0207     | 2.02591    | 0.551039  | 0.915834  | 2.16261   | 2.46173    |
| AC009362.2  | -0.509475  | -0.311958  | -0.224218 | 0.156086  | 0.640177  | 1.23101    |
| AC009403.2  | 0.66732    | 0.676782   | 0.882635  | 1.02051   | 0.509706  | 0.126299   |
| AC009404.2  | 0.470938   | 0.223769   | -0.825729 | -0.860651 | 1.91336   | 1.17598    |
| AC009487.6  | 5.77746    | 5.82738    | 5.40059   | 5.61391   | 5.70992   | 5.58794    |
| AC009501.4  | 0.742774   | 0.417142   | 0.107313  | -0.189343 | 0.618568  | 0.00852992 |

|             |           |           |            |           |             |           |
|-------------|-----------|-----------|------------|-----------|-------------|-----------|
| AC009505.2  | 1.09796   | 1.27079   | -0.0439716 | 0.266565  | -3.97771    | -4.70296  |
| AC009506.2  | 1.9529    | 2.24464   | 1.74517    | 2.50498   | 2.72325     | 3.07671   |
| AC009948.5  | 2.33711   | 2.47968   | 4.05846    | 4.19152   | 2.44561     | 2.39133   |
| AC009948.7  | 1.21734   | 1.50884   | 0.855392   | 1.12433   | 1.74741     | 1.077     |
| AC010226.4  | 0.0920856 | 0.0533477 | 0.534261   | -0.183051 | -0.0565422  | -0.338265 |
| AC010240.2  | 0.334442  | 0.251507  | 0.996447   | 0.736735  | 0.405873    | -0.421131 |
| AC010468.1  | 1.82106   | 1.88567   | 1.57878    | 2.10524   | 1.91977     | 3.60676   |
| AC010642.1  | 2.98875   | 2.76009   | 2.58688    | 2.55118   | 3.35868     | 2.84846   |
| AC010761.8  | 3.23689   | 2.98227   | 2.2049     | 2.3233    | 3.14562     | 2.64364   |
| AC010878.3  | 0.651059  | 1.0412    | -0.138184  | 0.587346  | 0.7689      | 0.759241  |
| AC010976.2  | 0.941805  | 0.672335  | 0.63863    | 0.586078  | 0.718763    | 0.026885  |
| AC011290.5  | 1.00971   | 1.23841   | 0.371169   | 0.563685  | 1.10129     | 0.879212  |
| AC011330.5  | 1.58697   | 0.883347  | 1.01257    | 0.956808  | 1.08776     | 0.852319  |
| AC011737.2  | 5.85648   | 5.82967   | 5.1596     | 5.54785   | 6.71574     | 7.45185   |
| AC012065.1  | 1.04409   | 1.05943   | 1.82178    | 1.90482   | 2.11325     | 2.66667   |
| AC012066.1  | 1.55896   | 1.60891   | 0.931017   | 0.815502  | 1.95674     | 0.74373   |
| AC012146.7  | 1.60996   | 1.51975   | 0.171489   | 0.656698  | 1.25975     | 2.44842   |
| AC012314.8  | 1.06758   | 1.02952   | 1.1593     | 1.37019   | 1.50213     | 0.968695  |
| AC012354.8  | 1.11563   | 1.33161   | 0.772443   | 0.82198   | 1.36764     | 1.46719   |
| AC012358.4  | 0.334442  | 0.248268  | 0.371169   | 0.521925  | 0.214809    | -0.848487 |
| AC012358.8  | 0.479624  | 0.441462  | 1.26168    | 1.13538   | 0.409798    | -0.778435 |
| AC012360.6  | 0.80878   | 0.794611  | 1.40897    | 1.61913   | -0.00196773 | -0.348991 |
| AC012512.1  | 3.02884   | 3.34612   | -3.37468   | -2.29753  | -0.0752099  | 0.293394  |
| AC012531.25 | 0.973406  | 1.20254   | 0.816542   | 0.857026  | 0.222446    | 0.0483059 |
| AC012613.2  | -0.998365 | 0.370142  | 2.2131     | 1.94648   | -0.393347   | -1.24695  |
| AC013470.6  | 0.731279  | 1.27893   | 0.23008    | 0.28948   | 1.33094     | 1.26809   |
| AC015849.14 | 0.721994  | 0.86462   | -0.309331  | 0.188831  | 0.646651    | 1.62916   |
| AC015849.19 | -0.026521 | 0.0450795 | 0.610974   | 0.399062  | 0.539452    | -1.06257  |
| AC015971.2  | 0.39157   | 0.517588  | 0.299514   | 0.224818  | 0.067501    | 0.0580255 |
| AC016292.3  | 1.54299   | 1.42229   | 1.04089    | 1.36947   | 1.39473     | 1.96155   |
| AC016549.1  | 1.67164   | 1.69706   | 2.09727    | 2.10551   | 1.98357     | 1.79316   |
| AC016691.2  | -0.530981 | -0.466467 | -0.148588  | -0.296194 | 0.678405    | 0.573568  |
| AC016722.4  | 1.11742   | 0.748684  | 1.17398    | 1.28558   | 0.923925    | 0.0352579 |
| AC016732.2  | 0.0831385 | 0.357428  | -0.191373  | 0.538647  | 0.821016    | 1.20023   |
| AC016734.2  | 4.45702   | 4.44937   | 4.13285    | 4.58404   | 5.4432      | 6.02859   |
| AC016738.4  | 2.00783   | 1.6033    | -1.48166   | -1.87061  | -1.78745    | -2.10446  |
| AC016739.2  | 5.49633   | 5.46899   | 4.86424    | 5.14507   | 5.73994     | 6.14173   |
| AC016747.3  | 2.42505   | 2.36372   | 2.32429    | 2.56714   | 2.27044     | 2.5787    |
| AC016831.7  | 2.45322   | 2.23414   | 2.24276    | 2.45724   | 1.70604     | 0.832509  |
| AC017002.1  | 0.52663   | 0.650562  | 1.55487    | 1.40544   | 0.323762    | -0.706491 |
| AC017002.2  | 1.85546   | 1.55462   | 2.50068    | 2.44476   | 1.62938     | 0.687079  |
| AC018463.4  | 1.24396   | 1.02411   | 0.960215   | 1.13058   | 1.00101     | 0.934562  |
| AC018804.7  | 2.49267   | 2.62564   | 1.55168    | 2.21205   | 3.09035     | 3.06378   |
| AC019097.7  | 2.48384   | 2.64374   | 1.9248     | 2.32704   | 2.39314     | 2.34778   |
| AC020951.1  | 1.15895   | 0.90354   | 0.488988   | 0.0612232 | -2.20023    | -3.38329  |
| AC021016.7  | 1.03163   | 1.17255   | 0.341473   | 0.975014  | 1.45537     | 1.4384    |
| AC021224.1  | 4.48747   | 4.42176   | 3.11916    | 3.27756   | 3.78889     | 3.89195   |
| AC022007.5  | 0.503125  | 0.20969   | 1.05436    | 1.27736   | 0.624559    | 0.0202853 |
| AC022182.2  | 1.839     | 1.93239   | 3.25448    | 3.5042    | 2.59553     | 2.10856   |
| AC024560.3  | 2.49785   | 2.7545    | 3.44266    | 3.6092    | 3.29829     | 2.87488   |
| AC025048.1  | 2.49566   | 2.4896    | 1.58869    | 1.52731   | 1.92835     | 2.20877   |
| AC025165.8  | -0.630575 | -0.746277 | 0.998932   | 0.697489  | -0.422      | -1.09453  |

|             |           |            |            |            |            |           |
|-------------|-----------|------------|------------|------------|------------|-----------|
| AC025171.1  | 0.918951  | 0.960601   | 2.32258    | 2.0561     | 1.17631    | 1.02127   |
| AC025335.1  | 0.952035  | 1.05291    | -0.0134653 | 0.414828   | 0.757612   | 0.33778   |
| AC026271.5  | 4.30995   | 4.28116    | 4.3127     | 4.63265    | 4.89116    | 5.46318   |
| AC027601.1  | 0.524655  | -0.0938436 | -0.0679464 | -0.0517057 | 0.0296578  | -0.322209 |
| AC027612.1  | 1.07276   | 0.795202   | 0.65678    | 0.506622   | 0.760809   | -0.117958 |
| AC027612.6  | 1.69199   | 1.58009    | 2.05009    | 2.25216    | -6.64581 ? |           |
| AC058791.1  | 4.78775   | 4.6332     | 4.71017    | 4.92114    | 3.82954    | 3.9135    |
| AC062029.1  | -0.175369 | -0.105152  | 0.770744   | 0.445854   | 0.448309   | 0.151378  |
| AC063976.7  | 0.356302  | 0.645757   | 1.46757    | 1.52057    | 0.86332    | -0.121607 |
| AC064850.4  | 2.30822   | 2.82122    | 2.2995     | 2.74215    | 2.43874    | 2.47715   |
| AC068491.3  | 0.803293  | 0.681152   | 1.10717    | 1.19997    | 1.10956    | 0.998152  |
| AC068580.6  | 0.481785  | 0.377035   | 1.42227    | 1.73628    | 1.41076    | 1.47775   |
| AC073052.1  | 0.255223  | 0.195474   | 0.623914   | 0.685662   | 0.258664   | 0.176042  |
| AC073063.10 | 1.6049    | 1.79844    | 1.55781    | 1.781      | 1.70231    | 2.25646   |
| AC073869.1  | 1.03407   | 0.943914   | 0.128861   | 0.891684   | 0.643348   | 0.134773  |
| AC073869.20 | 1.87859   | 1.87091    | 0.681404   | 1.47929    | 2.27533    | 2.37665   |
| AC074117.10 | 1.746     | 1.43659    | 1.30543    | 1.50616    | 1.59568    | 0.42163   |
| AC074212.5  | 0.262084  | -0.145419  | 0.118493   | -0.0772952 | 0.18334    | -0.372537 |
| AC074286.1  | 0.215989  | 0.449197   | 2.10432    | 2.40318    | 2.144      | 1.93975   |
| AC078899.1  | 2.50206   | 2.57402    | 2.64818    | 2.88706    | 3.27076    | 3.42172   |
| AC079250.1  | 0.701939  | 0.399959   | 0.120896   | 0.623052   | 1.50737    | 1.64325   |
| AC079922.3  | 1.03569   | 1.2237     | -0.723865  | -0.108685  | -1.30241   | -1.18284  |
| AC083843.1  | 3.77867   | 3.64044    | 2.78803    | 2.79506    | 3.48052    | 2.89692   |
| AC083843.4  | 0.980457  | 1.03706    | -0.935332  | -0.616766  | 1.04711    | 0.176042  |
| AC083873.4  | 3.06543   | 2.74515    | 2.96874    | 3.09229    | 3.19136    | 3.0596    |
| AC083884.8  | 1.43673   | 1.5189     | 2.29291    | 2.25223    | 1.80904    | 0.659578  |
| AC083899.3  | 1.13194   | 1.38221    | 0.881234   | 0.507353   | 1.6854     | 1.59597   |
| AC084082.3  | -0.191134 | -0.0876659 | 0.82777    | 1.07114    | 0.0122397  | 0.0747657 |
| AC084219.2  | 1.94014   | 1.58112    | 1.02168    | 1.1007     | 1.89295    | 2.42204   |
| AC084219.3  | 0.593947  | 0.491925   | 1.06507    | 1.13375    | 0.913332   | 0.216834  |
| AC084219.4  | 1.13792   | 1.40795    | -0.113992  | 0.127752   | 1.1765     | 1.11699   |
| AC090945.1  | 0.599051  | 1.22152    | -0.0132294 | 0.265929   | -0.418253  | -0.536593 |
| AC091492.2  | 0.18716   | 0.151898   | 0.113767   | 0.66123    | 0.465118   | 0.377202  |
| AC091729.9  | 0.529821  | 0.251507   | 1.41643    | 1.45345    | 0.0946955  | -0.577229 |
| AC092066.1  | 0.470938  | 0.635262   | 1.14744    | 1.77994    | 1.57813    | 1.62424   |
| AC092168.2  | 1.76447   | 1.71211    | -1.93506   | -2.02079   | -2.48959   | -5.69922  |
| AC092171.4  | 2.31774   | 2.11082    | 2.49948    | 2.45343    | 2.63891    | 2.25909   |
| AC092641.2  | -0.51033  | -0.518536  | -0.0370098 | 0.176693   | 0.181611   | 0.455649  |
| AC092835.2  | 2.12112   | 2.3218     | 0.636738   | 0.549472   | -0.777433  | -0.31423  |
| AC092881.1  | 2.96981   | 2.83408    | 2.61415    | 2.54224    | 1.9581     | 1.83247   |
| AC093106.5  | 0.414828  | 0.625327   | 0.179269   | 0.406787   | 0.968946   | 1.23171   |
| AC093323.3  | 2.8641    | 3.07459    | 2.58431    | 2.98093    | 2.9883     | 3.30464   |
| AC093495.4  | 1.12091   | 1.00615    | 0.393526   | 0.785274   | 0.101274   | 0.295182  |
| AC093616.4  | 1.31519   | 1.13994    | 2.12428    | 1.99252    | 2.15863    | 2.05839   |
| AC093673.5  | 1.47089   | 1.33161    | 0.723445   | 1.0909     | 0.924716   | 0.247587  |
| AC093690.1  | 0.700164  | 0.603701   | 0.65183    | 0.225361   | 0.673837   | 0.100762  |
| AC093724.2  | 2.80325   | 2.90416    | 2.32535    | 2.80899    | 2.87349    | 2.81092   |
| AC093838.4  | 2.84591   | 2.71492    | 2.84868    | 2.9903     | 2.40275    | 1.6142    |
| AC096664.1  | -0.356894 | -0.0512706 | -0.533002  | 0.32217    | 0.641934   | 1.16719   |
| AC097711.1  | 0.144086  | 0.332175   | 0.107273   | 0.805581   | 1.0064     | 0.778276  |
| AC098614.2  | 3.28229   | 3.48725    | 3.4922     | 3.80072    | 4.39914    | 4.28919   |
| AC104297.1  | 1.34384   | 1.3653     | 0.468333   | 1.16049    | 1.77645    | 2.56203   |

|            |            |             |           |            |            |            |
|------------|------------|-------------|-----------|------------|------------|------------|
| AC104651.2 | 0.806794   | 0.881649    | 0.0948846 | 0.76623    | 0.989502   | 1.23311    |
| AC107081.5 | 0.0368057  | 0.137399    | -0.195072 | -0.165577  | -0.0659727 | 0.429343   |
| AC108142.1 | 1.90294    | 1.62484     | 1.3166    | 1.14362    | 3.40179    | 3.10065    |
| AC108479.2 | 0.109922   | 0.0353283   | 0.0446179 | -0.0183724 | 0.450538   | 0.656808   |
| AC108488.4 | 0.0742451  | -0.114677   | -0.185007 | -0.436244  | 0.384072   | 0.188806   |
| AC113404.1 | 4.97015    | 5.32068     | 4.34583   | 5.00968    | 5.15209    | 5.83788    |
| AC114271.2 | -0.0517924 | -0.271252   | -0.157105 | 0.548723   | 0.648438   | 0.372462   |
| AC114776.1 | 0.244911   | 0.417088    | 0.14479   | 0.483241   | 1.05068    | 1.4979     |
| AC115617.2 | 0.254461   | 0.456112    | 0.287283  | 0.758499   | -0.114135  | -0.0819817 |
| AC116366.6 | -0.592406  | -0.559222   | 2.16183   | 2.18305    | -0.124341  | -0.888659  |
| AC125232.1 | 2.07253    | 1.85539     | 1.05148   | 1.20804    | 1.96249    | 1.06919    |
| AC125238.2 | 0.857973   | 1.1834      | 0.712842  | 1.17856    | 1.40814    | 1.04469    |
| AC127904.2 | 0.0152977  | -0.00328298 | 0.976408  | 0.924662   | 0.969108   | -0.662104  |
| AC133644.2 | 1.76736    | 1.64123     | 2.71721   | 2.80772    | 1.58667    | 0.669009   |
| AC133644.3 | -0.359536  | -0.18573    | 0.389071  | 0.0312964  | 0.486992   | 0.0201857  |
| AC137932.4 | 0.858275   | 0.929261    | 0.655828  | 0.799212   | 0.415164   | -0.318668  |
| AC138969.4 | 3.0515     | 2.56525     | 3.82365   | 3.56857    | 3.1025     | 2.38015    |
| AC141586.5 | 1.70757    | 1.62468     | 1.99206   | 1.67288    | 1.68816    | 0.787449   |
| AC142472.6 | 0.54893    | 0.237698    | 0.584741  | 0.505972   | 0.0122397  | -0.421131  |
| AC144530.1 | 1.57593    | 1.81336     | 0.839734  | 1.43007    | 1.53555    | 1.45684    |
| AC144652.1 | 0.952035   | 0.514521    | -0.428455 | -0.0642959 | -0.184426  | 0.176042   |
| AC145676.2 | 1.62288    | 1.51447     | 1.25116   | 1.8512     | -0.250761  | -0.0627204 |
| AC159540.1 | 0.874703   | 0.83779     | 0.780562  | 0.590636   | 2.7831     | 2.37849    |
| AC241585.2 | 1.42347    | 0.948825    | -0.247207 | -0.36274   | -2.85453   | -1.34299   |
| AC245100.1 | 1.36883    | 0.777123    | -0.548134 | -0.161558  | -0.048824  | -0.736312  |
| AC253572.1 | 1.65502    | 1.54645     | 1.24331   | 1.17312    | 0.505149   | 0.257687   |
| ACAA1      | 3.92314    | 3.6997      | 3.39454   | 3.71168    | 4.45429    | 4.40502    |
| ACAA2      | 3.66073    | 3.41675     | 3.61302   | 3.85731    | 2.99175    | 3.14399    |
| ACACA      | 6.75343    | 6.4931      | 6.8542    | 6.93639    | 7.21188    | 6.83871    |
| ACACB      | 1.47089    | 1.53154     | 1.7707    | 1.77994    | 1.1471     | 0.937201   |
| ACAD10     | 3.27677    | 3.17559     | 3.843     | 3.77991    | 3.21928    | 2.81293    |
| ACAD11     | 3.01901    | 3.03937     | 2.74695   | 2.98933    | 3.20217    | 2.76708    |
| ACAD8      | 3.20631    | 3.13335     | 3.65725   | 3.95591    | 4.11858    | 4.26913    |
| ACAD9      | 3.98463    | 4.08226     | 4.23076   | 4.65299    | 3.66108    | 3.81337    |
| ACADM      | 4.40813    | 4.72326     | 4.32625   | 4.84317    | 5.1157     | 5.84451    |
| ACADS      | 0.840145   | 0.20969     | -0.455418 | -0.201784  | 0.197777   | 0.769095   |
| ACADSB     | 3.18966    | 3.13335     | 3.59456   | 3.97065    | 4.23829    | 4.07629    |
| ACADVL     | 6.13478    | 6.20425     | 6.71677   | 6.83019    | 6.67869    | 6.39394    |
| ACAP1      | 0.207918   | 0.251507    | 1.39395   | 1.35065    | 0.539452   | -0.183001  |
| ACAP2      | 4.9609     | 5.42209     | 6.24667   | 6.62035    | 6.03883    | 6.3634     |
| ACAP3      | 2.62022    | 2.08469     | 3.61899   | 3.47905    | 3.29315    | 3.07535    |
| ACAT1      | 2.58633    | 2.37006     | 4.39096   | 4.85475    | 4.4657     | 4.87166    |
| ACAT2      | 4.75739    | 4.86117     | 4.48957   | 5.12392    | 5.37651    | 5.94587    |
| ACBD3      | 4.52688    | 4.6957      | 4.89123   | 5.36061    | 5.41061    | 5.46314    |
| ACBD4      | 1.29532    | 0.868134    | 1.55122   | 1.53507    | 1.27048    | 0.97985    |
| ACBD5      | 3.96002    | 3.98319     | 3.50298   | 3.9342     | 5.20078    | 5.18658    |
| ACBD6      | 4.50486    | 4.42725     | 4.03634   | 4.19642    | 4.38187    | 4.27866    |
| ACCS       | 1.97337    | 1.78511     | 2.24695   | 2.02048    | 0.0677351  | -0.848487  |
| ACD        | 2.30937    | 2.30866     | 2.27592   | 2.74916    | 3.07947    | 3.37011    |
| ACER3      | 5.14247    | 5.23628     | 4.59372   | 4.8663     | 3.82048    | 3.87448    |
| ACIN1      | 6.31797    | 6.28105     | 5.99174   | 6.14768    | 6.39359    | 5.75288    |
| ACKR3      | ?          | -6.45019    | 1.83887   | 1.50592    | 0.815493   | 0.483199   |

|          |           |           |            |            |           |           |
|----------|-----------|-----------|------------|------------|-----------|-----------|
| ACLY     | 7.2152    | 7.08188   | 7.14922    | 7.52064    | 7.96373   | 8.07732   |
| ACO1     | 5.47049   | 5.38261   | 4.70443    | 5.39944    | 5.23146   | 5.25328   |
| ACO2     | 4.24953   | 4.29271   | 5.2165     | 5.63857    | 5.01748   | 5.15175   |
| ACOT11   | 0.807915  | 1.10522   | -0.263444  | 0.370231   | -0.682812 | -0.421131 |
| ACOT13   | 3.15933   | 3.24814   | 3.78518    | 4.11298    | 3.75934   | 4.10403   |
| ACOT2    | 2.2877    | 2.31348   | 1.24069    | 1.77151    | 2.79912   | 3.06235   |
| ACOT7    | 3.42367   | 3.3917    | 4.71411    | 5.23324    | 4.38871   | 4.87537   |
| ACOT8    | 3.5735    | 3.62216   | 3.49965    | 3.78389    | 3.23354   | 3.42125   |
| ACOT9    | 3.2287    | 3.14634   | 3.88793    | 4.34443    | 3.35092   | 3.34585   |
| ACOX1    | 5.14093   | 4.83406   | 5.15166    | 5.11577    | 5.92896   | 5.61806   |
| ACOX2    | 1.88966   | 1.53154   | -0.568612  | 0.0612232  | -0.777433 | -0.214706 |
| ACOX3    | 2.54411   | 2.39826   | 3.07858    | 3.377      | 3.20851   | 3.18811   |
| ACP1     | 5.15308   | 5.20436   | 4.29424    | 4.87772    | 5.52944   | 6.03087   |
| ACP2     | 3.82829   | 3.6018    | 3.92228    | 4.10154    | 4.46178   | 4.39521   |
| ACP6     | 5.2014    | 5.1338    | 3.41453    | 3.56183    | 4.50208   | 4.86028   |
| ACPP     | 0.800836  | 0.746683  | 0.882627   | 0.266325 ? |           | -5.69922  |
| ACRC     | 1.32887   | 1.2583    | -1.48269   | -0.979274  | 1.76178   | 1.53173   |
| ACSBG1   | 0.0966802 | -0.117457 | -0.326881  | -0.191134  | 0.610983  | 0.669036  |
| ACSF2    | 1.72302   | 1.60328   | 4.11224    | 4.26076    | 1.43776   | 1.76092   |
| ACSF3    | 3.72437   | 3.46492   | 3.54242    | 3.62897    | 2.92674   | 2.51134   |
| ACSL1    | 5.23937   | 5.26594   | 4.07032    | 4.83147    | 2.34813   | 2.45821   |
| ACSL3    | 7.98594   | 8.00208   | 7.45337    | 7.55443    | 7.65498   | 7.5024    |
| ACSL4    | 5.11029   | 5.34047   | 6.73464    | 7.37633    | 7.25038   | 7.95372   |
| ACSL5    | -1.47325  | -1.2146   | 3.81305    | 4.44817    | -0.935975 | -0.662104 |
| ACSS1    | 5.63268   | 5.45862   | 2.25944    | 2.59509    | 2.21007   | 2.69844   |
| ACSS2    | 4.47333   | 4.55466   | 3.93801    | 4.15796    | 2.64576   | 2.57407   |
| ACSS3    | -4.30714  | -4.45968  | -3.25397 ? |            | 3.11587   | 3.13147   |
| ACTA2    | 2.3906    | 1.90917   | 0.507475   | 0.393405   | -0.311021 | -0.882653 |
| ACTB     | 9.98583   | 9.96888   | 10.3495    | 10.5194    | 10.9942   | 10.893    |
| ACTBL2   | 4.02201   | 4.34932   | -3.59683   | -3.52222 ? |           | -5.69922  |
| ACTBP11  | -0.242144 | 0.0916254 | 0.132879   | 0.859477   | 0.994558  | 0.758721  |
| ACTBP2   | 3.48567   | 3.63959   | 3.9828     | 4.06503    | 4.54668   | 4.45763   |
| ACTBP7   | 1.38843   | 1.045     | -3.85951   | -2.52058   | 1.08037   | -0.799586 |
| ACTG1    | 9.46062   | 9.57086   | 9.24428    | 9.63883    | 10.805    | 11.0093   |
| ACTG1P1  | -0.489437 | -0.122851 | -0.568612  | -0.327299  | 0.659934  | 0.863209  |
| ACTG1P14 | 0.663099  | 0.862844  | 1.08608    | 1.46866    | 1.85109   | 1.33775   |
| ACTG1P18 | 1.67599   | 1.35738   | -6.17309   | -3.78492   | 0.0402612 | -0.247123 |
| ACTG1P20 | 1.19257   | 1.44276   | 0.749328   | 1.25717    | 2.09019   | 2.06472   |
| ACTG2    | -5.69162  | -5.45651  | -3.01245   | -2.30078   | 2.61582   | 2.48806   |
| ACTL10   | 0.586404  | 0.357428  | 0.580888   | 0.640741   | -0.320293 | -1.18284  |
| ACTL6A   | 4.59758   | 4.71184   | 4.46795    | 4.86591    | 5.16652   | 5.61439   |
| ACTN1    | 7.36201   | 7.40875   | 6.25045    | 6.53524    | 7.02459   | 6.75757   |
| ACTN4    | 7.59766   | 7.48221   | 6.65403    | 7.08826    | 8.61228   | 8.57701   |
| ACTN4P1  | 2.22813   | 2.22052   | 1.41548    | 2.01598    | 3.4034    | 2.96667   |
| ACTR10   | 3.80871   | 3.91219   | 3.07858    | 3.50588    | 3.87204   | 4.60729   |
| ACTR1A   | 5.70764   | 5.54333   | 5.96304    | 6.20457    | 6.06649   | 5.98587   |
| ACTR1B   | 3.80176   | 3.60458   | 3.53415    | 3.61227    | 3.26302   | 3.30451   |
| ACTR2    | 6.60621   | 6.69943   | 6.66259    | 6.9835     | 7.42899   | 7.39548   |
| ACTR3    | 6.8328    | 6.96804   | 6.83354    | 7.30499    | 7.5533    | 7.84361   |
| ACTR3B   | 2.9506    | 2.84071   | 2.30669    | 2.03547    | 2.35384   | 2.07867   |
| ACTR3P2  | 0.972274  | 1.32259   | 1.07737    | 1.38608    | 1.98545   | 2.04525   |
| ACTR5    | 3.03733   | 3.25826   | 2.11571    | 2.47239    | 2.49199   | 2.60164   |

|              |            |           |           |            |           |           |
|--------------|------------|-----------|-----------|------------|-----------|-----------|
| ACTR6        | 3.71138    | 3.79454   | 2.68377   | 2.88553    | 3.27632   | 4.31009   |
| ACTR8        | 4.21456    | 4.2987    | 3.5697    | 3.99315    | 4.28367   | 4.42771   |
| ACVR1        | 3.91654    | 3.82487   | 3.8595    | 3.94782    | 3.75858   | 4.03138   |
| ACVR1B       | 3.60241    | 3.57882   | 3.72336   | 3.84246    | 2.59236   | 2.48312   |
| ACVR2A       | 3.81348    | 3.85288   | 4.14695   | 3.79839    | 4.35771   | 4.30961   |
| ACVR2B       | 5.40715    | 5.68308   | 3.70065   | 3.77382    | 4.28585   | 4.57057   |
| ACVRL1       | -6.68418 ? |           | 4.63424   | 4.56005 ?  |           | -5.69922  |
| ACY1         | 3.32099    | 3.15738   | 2.27636   | 2.32191    | 2.53743   | 3.1165    |
| ACYPI        | 1.43538    | 1.60865   | 1.47492   | 1.90801    | 2.51073   | 2.28766   |
| ACYP2        | -0.891472  | -0.707737 | 0.27602   | 0.463758   | 0.871126  | 1.27877   |
| ADA          | 1.76038    | 1.95081   | 0.759062  | 1.07114    | 1.17894   | 1.92993   |
| ADAL         | 3.31355    | 3.04495   | 3.07151   | 3.1055     | 3.56851   | 3.65523   |
| ADAM10       | 7.24477    | 7.16375   | 6.80303   | 7.0425     | 6.62635   | 6.80873   |
| ADAM12       | 4.02543    | 4.08886   | 4.01246   | 4.83222    | 7.9408    | 8.35258   |
| ADAM15       | 5.94681    | 5.75844   | 5.26973   | 5.49293    | 5.09581   | 5.38339   |
| ADAM17       | 5.83795    | 5.90433   | 5.74501   | 6.02833    | 6.84832   | 6.84583   |
| ADAM19       | 5.54945    | 5.73742   | 4.31831   | 4.47707    | 7.60747   | 7.44147   |
| ADAM22       | 3.75829    | 4.11458   | 3.92891   | 4.01659    | 3.30692   | 3.78112   |
| ADAM23       | 3.81957    | 4.04593   | 3.27591   | 3.4686     | 2.64804   | 2.76903   |
| ADAM32       | 1.12752    | 0.775632  | 0.503064  | 0.724135   | 2.24057   | 1.92267   |
| ADAM9        | 7.48866    | 7.37971   | 7.7829    | 8.23126    | 7.64009   | 7.51242   |
| ADAMTS1      | 5.07445    | 4.32016   | 5.50253   | 4.65769    | 2.64119   | 1.76092   |
| ADAMTS10     | -2.9975    | -4.13839  | 0.849967  | 0.414828   | 1.04018   | 0.443129  |
| ADAMTS12     | 4.31006    | 4.71829   | 6.07268   | 6.12775    | 4.75595   | 5.33632   |
| ADAMTS15     | 3.24637    | 3.40444   | 1.47473   | 1.54226    | 5.04315   | 4.39263   |
| ADAMTS16     | 3.03054    | 2.94655   | 1.45314   | 1.98395    | 4.05823   | 3.55773   |
| ADAMTS17     | 1.67305    | 1.27821   | -3.37468  | -3.94057 ? |           | ?         |
| ADAMTS3      | 3.67377    | 3.30037   | 1.22592   | 1.15801    | -1.80184  | -0.95156  |
| ADAMTS4      | -0.768111  | -1.55554  | -1.86109  | -2.10822   | 4.71472   | 3.81292   |
| ADAMTS5      | -3.8896    | -4.45968  | 3.60274   | 1.42259    | -0.302594 | -1.70626  |
| ADAMTS6      | 1.98744    | 2.49427   | 1.35568   | 1.59857    | 1.82755   | 2.18812   |
| ADAMTS7      | 1.19161    | 1.04266   | 2.2498    | 1.62812    | 2.3236    | 1.44896   |
| ADAMTS9      | 6.01529    | 5.88542   | 4.31323   | 3.46193    | 0.670133  | -0.214706 |
| ADAMTS9-AS1  | 2.02004    | 1.97018   | 1.16605   | -0.074789  | -5.04123  | -4.70296  |
| ADAMTSL1     | -4.69535   | -4.45968  | -0.117291 | 0.879925   | 6.28514   | 6.39559   |
| ADAMTSL4     | 0.670378   | -0.021346 | 0.549502  | 0.744376   | -0.181419 | -1.85459  |
| ADAMTSL4-AS1 | 1.30462    | 1.33872   | 0.754725  | 0.624466   | 0.256443  | -0.400427 |
| ADAR         | 7.77178    | 7.7248    | 7.57767   | 7.73774    | 7.89126   | 7.47101   |
| ADARB1       | 5.49318    | 5.12211   | 4.18061   | 4.91976    | 4.56429   | 4.36206   |
| ADAT1        | 4.20329    | 4.14077   | 4.10764   | 4.47142    | 3.89331   | 4.20017   |
| ADAT2        | 2.29529    | 2.41061   | 2.03082   | 2.15798    | 3.19923   | 2.82467   |
| ADCK1        | 1.03569    | 0.525929  | -0.161008 | -0.154483  | 1.04018   | 1.08775   |
| ADCK2        | 4.04766    | 3.89879   | 2.78327   | 2.78058    | 3.47181   | 3.77174   |
| ADCK3        | 4.3697     | 4.20071   | 2.93801   | 3.04093    | 3.62046   | 3.82271   |
| ADCK4        | 3.09696    | 2.77557   | 3.22375   | 3.23547    | 3.01389   | 2.98678   |
| ADCK5        | 0.520176   | -0.036446 | 1.12031   | 1.06115    | -0.267833 | -0.38461  |
| ADCY1        | 2.10184    | 1.64571   | 2.42382   | 2.18581    | -1.80184  | -2.12114  |
| ADCY10P1     | 1.00142    | 1.38894   | -1.18321  | -2.93781   | 1.25263   | 0.719622  |
| ADCY3        | 5.47395    | 5.33454   | 4.52864   | 4.58643    | 4.63664   | 4.58511   |
| ADCY6        | 4.65955    | 4.63255   | 4.39202   | 4.33515    | 3.80831   | 3.70474   |
| ADCY7        | 2.66713    | 2.6798    | 3.5666    | 3.68036    | 1.27969   | 0.989946  |
| ADCY9        | 4.28889    | 4.13892   | 5.13501   | 5.18636    | 3.5769    | 3.0178    |



|             |            |           |           |           |            |           |
|-------------|------------|-----------|-----------|-----------|------------|-----------|
| ADD1        | 5.78119    | 5.63683   | 6.03798   | 6.14085   | 6.53119    | 6.12574   |
| ADD2        | -2.69815   | -3.29152  | 1.52387   | 1.46107   | 4.97767    | 4.5624    |
| ADD3        | 4.83072    | 5.11127   | 6.13868   | 6.29254   | 3.4165     | 3.54594   |
| ADGRA2      | 3.49888    | 3.14473   | 4.52594   | 3.9515    | 0.431912   | -0.903665 |
| ADGRA3      | 6.3705     | 6.43131   | 5.51514   | 5.72853   | 5.48173    | 5.34707   |
| ADGRB2      | 2.95018    | 2.31525   | 2.67135   | 2.42646   | 0.939663   | 1.33772   |
| ADGRE1      | 0.743937   | 0.90354   | 1.95093   | 2.36287   | -5.07051   | -5.69922  |
| ADGRE5      | 4.74571    | 4.52449   | 4.53068   | 4.84722   | 5.0704     | 4.55027   |
| ADGRF1      | -3.11289   | -2.46206  | 1.86635   | 1.57771   | -6.64581 ? |           |
| ADGRG1      | 3.36566    | 3.67927   | 1.48185   | 2.76155   | 6.24561    | 6.42867   |
| ADGRG2      | -2.69815   | -1.87737  | 1.98141   | 2.50957   | -2.33767   | -1.24695  |
| ADGRG6      | 4.67541    | 5.05482   | -2.72315  | -2.93781  | 1.46901    | 1.62424   |
| ADGRL1      | 4.06464    | 3.68354   | 3.62095   | 3.60738   | 4.26719    | 3.86432   |
| ADGRL2      | 5.86553    | 5.89715   | 3.6462    | 2.87132   | -3.33694   | -4.70296  |
| ADGRL3      | 3.15111    | 2.53717 ? |           | -5.10387  | -2.41163   | -2.8983   |
| ADGRV1      | -2.45038   | -2.00285  | 4.49155   | 4.73822   | 6.78458    | 6.13956   |
| ADH5        | 5.4731     | 5.48362   | 6.02277   | 6.27788   | 5.42836    | 6.20303   |
| ADH5P4      | 2.41022    | 2.52962   | 2.97079   | 3.37251   | 2.52145    | 3.28507   |
| ADII        | 4.10662    | 4.66832   | 3.55625   | 4.71768   | 4.59526    | 5.82366   |
| ADIPOR1     | 5.90662    | 5.99093   | 4.99948   | 5.5578    | 6.2749     | 6.57351   |
| ADIPOR2     | 5.95555    | 6.03275   | 5.83883   | 6.22655   | 5.78107    | 6.14346   |
| ADIRF-AS1   | 1.66814    | 1.83142   | 2.72224   | 2.93914   | -0.403217  | -1.0757   |
| ADK         | 3.98132    | 4.02768   | 2.94183   | 3.40845   | 3.90706    | 4.47816   |
| ADM         | 4.31912    | 4.02096   | 6.30203   | 6.20036   | 4.11858    | 3.04148   |
| ADNP        | 6.32223    | 6.24688   | 6.22667   | 5.95154   | 6.30926    | 6.29114   |
| ADNP-AS1    | 0.693311   | 0.251507  | 0.292311  | 0.266325  | 0.0812851  | -0.848487 |
| ADNP2       | 4.96669    | 4.91652   | 3.95218   | 4.1067    | 4.30979    | 3.97452   |
| ADO         | 4.35742    | 4.37757   | 2.9166    | 3.26404   | 4.12899    | 4.61401   |
| ADORA1      | -1.74441   | -1.105    | 2.62052   | 3.16264   | -1.23372   | -1.24695  |
| ADORA2B     | 4.43469    | 4.48914   | 3.55288   | 4.16379   | 5.02443    | 4.92811   |
| ADPGK       | 5.63376    | 5.4577    | 5.59223   | 5.958     | 5.32068    | 5.41907   |
| ADPRHL2     | 3.50304    | 3.48844   | 2.8554    | 3.30269   | 4.3868     | 4.48063   |
| ADPRM       | 0.586404   | 0.980157  | 1.20884   | 1.31748   | 1.70166    | 2.61522   |
| ADRA1B      | -0.306598  | 0.61405   | -0.428455 | -0.086319 | 2.52705    | 2.5925    |
| ADRA1D      | ?          | -6.45019  | 0.431281  | 0.300663  | 0.489522   | 0.359476  |
| ADRB2       | 1.03569    | 2.01291   | 2.94576   | 3.75845   | 1.15352    | -0.121607 |
| ADRBK1      | 4.22572    | 3.76837   | 3.9839    | 4.05355   | 3.71689    | 3.51969   |
| ADRBK2      | -6.68418 ? |           | 2.65569   | 2.63601   | 4.37654    | 4.51607   |
| ADRM1       | 5.62483    | 5.62239   | 4.74094   | 5.24852   | 5.489      | 5.84693   |
| ADSL        | 5.99828    | 5.99313   | 4.66165   | 5.12658   | 5.62616    | 6.05192   |
| ADSS        | 4.77336    | 4.90146   | 4.36484   | 4.80327   | 5.14871    | 5.56324   |
| AEBP2       | 4.58977    | 4.61729   | 4.03806   | 4.07975   | 4.40308    | 3.85933   |
| AEN         | 5.42341    | 5.4627    | 3.58466   | 4.03327   | 4.40308    | 4.54714   |
| AES         | 4.85707    | 4.78949   | 4.54053   | 4.85764   | 5.65237    | 5.92665   |
| AF127577.13 | 3.56418    | 3.037     | 3.23433   | 2.85696   | 1.40043    | 1.00759   |
| AF127936.9  | 1.33871    | 1.48754   | 2.29424   | 2.25678   | 1.76436    | 2.23299   |
| AF131215.2  | 1.71458    | 1.46201   | 1.89865   | 1.6394    | 1.7868     | 1.50278   |
| AF131215.3  | 0.266817   | 0.305445  | 0.935482  | 0.563685  | 0.405873   | -1.4584   |
| AF131215.4  | 0.529821   | 0.344613  | 1.23438   | 0.833756  | 0.185296   | -0.38461  |
| AF131215.9  | 1.10833    | 1.07637   | 1.7707    | 1.27492   | 1.14064    | 0.832509  |
| AF131216.6  | 1.48556    | 1.62524   | 1.86625   | 1.80307   | 0.843855   | 0.87611   |
| AF196972.4  | -0.394026  | -0.101278 | 0.12446   | 0.947868  | -0.087922  | -0.151977 |

|            |           |           |           |            |            |           |
|------------|-----------|-----------|-----------|------------|------------|-----------|
| AFAP1      | 6.57899   | 6.43998   | 3.98637   | 4.14901    | 5.55029    | 5.18309   |
| AFAP1-AS1  | 3.30583   | 3.27502   | 0.966512  | 0.793663   | 1.92904    | 1.09531   |
| AFAP1L1    | 3.66396   | 4.0027    | 3.84576   | 4.65354    | 1.1471     | 0.50283   |
| AFAP1L2    | 3.22277   | 3.39513   | 4.96175   | 5.01915    | -6.64581 ? |           |
| AFF1       | 4.35959   | 4.45004   | 4.84231   | 4.91146    | 4.67342    | 4.52928   |
| AFF4       | 6.94691   | 6.95564   | 7.33423   | 7.44201    | 7.45333    | 7.13328   |
| AFG3L1P    | 4.59266   | 4.61597   | 3.56634   | 3.60197    | 3.05909    | 2.43285   |
| AFG3L2     | 4.81248   | 4.87914   | 4.78792   | 5.09714    | 5.33277    | 5.37945   |
| AFG3L2P1   | 0.0305903 | 0.154894  | 0.228357  | 0.582874   | 0.911408   | 0.513572  |
| AFMID      | 2.7726    | 2.87032   | 2.13842   | 2.68234    | 3.45473    | 3.54358   |
| AFP        | ?         | -6.45019  | -3.18222  | -2.40763   | 1.02625    | 1.493     |
| AFTPH      | 5.17359   | 5.21158   | 4.05627   | 4.27178    | 4.97084    | 5.2392    |
| AGA        | 4.03308   | 4.00475   | 2.49597   | 3.03838    | 2.90194    | 3.25907   |
| AGAP1      | 5.26019   | 5.24624   | 4.2976    | 4.35265    | 5.14703    | 4.87542   |
| AGAP2-AS1  | 1.06625   | 0.922868  | 1.42698   | 1.70515    | 1.57594    | 2.06693   |
| AGAP3      | 4.70765   | 4.50797   | 4.58383   | 4.78371    | 4.85143    | 4.83146   |
| AGAP4      | 2.56384   | 2.30004   | 1.23658   | 1.01422    | 2.73965    | 2.07872   |
| AGAP5      | -0.806927 | -0.155989 | 0.412044  | 0.352883   | 1.14509    | 0.692784  |
| AGAP6      | 2.58269   | 2.49315   | 2.22933   | 2.27996    | 3.32314    | 2.54027   |
| AGAP7P     | -0.927702 | -0.592889 | 1.69948   | 1.75101    | 0.508885   | -0.947531 |
| AGAP9      | 1.37513   | 1.46354   | 2.0406    | 2.01347    | 1.90473    | 0.540474  |
| AGBL5      | 4.69252   | 4.70278   | 3.76352   | 3.87379    | 4.33462    | 4.4479    |
| AGFG1      | 5.69053   | 5.70675   | 5.81046   | 6.08315    | 6.58387    | 6.39394   |
| AGFG2      | 2.98216   | 2.70709   | 3.28      | 4.35571    | 3.61698    | 3.76089   |
| AGGF1      | 4.67974   | 4.82139   | 4.9776    | 5.10305    | 5.2906     | 5.64145   |
| AGK        | 4.7741    | 4.82926   | 4.23311   | 4.48175    | 5.21615    | 5.48557   |
| AGL        | 4.27746   | 4.25568   | 4.39673   | 4.54132    | 4.59472    | 4.69203   |
| AGMO       | 1.52013   | 1.86361   | -6.17309  | -6.09892 ? | ?          |           |
| AGO1       | 5.80051   | 6.08257   | 5.26665   | 5.67334    | 6.31161    | 6.00495   |
| AGO2       | 6.89626   | 6.74202   | 5.90592   | 5.75884    | 6.58983    | 5.66777   |
| AGO3       | 5.29067   | 5.42323   | 4.89127   | 4.97194    | 6.18477    | 5.91716   |
| AGO4       | 3.50915   | 3.60593   | 2.94834   | 2.81302    | 3.33122    | 3.15748   |
| AGPAT1     | 4.37962   | 4.19357   | 3.84856   | 3.98078    | 4.8564     | 4.81411   |
| AGPAT2     | 2.37508   | 2.22017   | 2.31634   | 2.56361    | 1.59712    | 2.27059   |
| AGPAT3     | 4.86935   | 4.91598   | 5.5554    | 5.95592    | 4.26598    | 4.44556   |
| AGPAT4     | 3.15423   | 3.02499   | 3.91976   | 3.88694    | 5.53075    | 4.88948   |
| AGPAT4-IT1 | -1.1752   | -0.214764 | -0.117291 | 0.773887   | 1.82755    | 1.33772   |
| AGPAT5     | 5.49935   | 5.4866    | 4.79161   | 5.01398    | 6.07037    | 5.88341   |
| AGPAT6     | 5.74588   | 5.80972   | 4.95663   | 5.15496    | 5.29857    | 5.24017   |
| AGPAT9     | 5.80523   | 5.62592   | 4.82421   | 5.28509    | 4.27042    | 4.40442   |
| AGPS       | 5.33811   | 5.62891   | 6.2576    | 6.68598    | 6.97392    | 7.4888    |
| AGRN       | 3.67595   | 3.17378   | 4.58629   | 4.30268    | 4.37724    | 4.06477   |
| AGTPBP1    | 4.49507   | 4.69196   | 1.97637   | 2.62589    | 4.21544    | 4.80996   |
| AGTRAP     | 3.04239   | 2.80395   | 3.53072   | 4.01141    | 2.03668    | 2.33222   |
| AHCTF1     | 6.48315   | 6.46884   | 6.15627   | 6.35216    | 6.4841     | 6.31177   |
| AHCY       | 7.01076   | 6.89542   | 5.97719   | 6.0928     | 6.69681    | 6.89903   |
| AHCYL1     | 5.53632   | 5.92754   | 6.2301    | 6.6982     | 5.9681     | 6.52235   |
| AHCYL2     | 3.35892   | 3.16286   | 2.77938   | 2.77076    | 3.52208    | 3.60163   |
| AHDC1      | 2.24051   | 2.18822   | 2.79662   | 2.60543    | 3.05736    | 2.63759   |
| AHI1       | 4.02202   | 4.13985   | 4.1652    | 4.48642    | 4.56669    | 4.8421    |
| AHNAK      | 9.79411   | 10.2065   | 10.6791   | 11.207     | 8.01077    | 8.68122   |
| AHNAK2     | 7.22041   | 8.29722   | 2.47446   | 3.57049    | 5.3938     | 6.47121   |

|            |           |           |          |           |           |           |
|------------|-----------|-----------|----------|-----------|-----------|-----------|
| AHR        | 6.55258   | 6.50132   | 7.92495  | 8.16971   | -2.33767  | -2.38405  |
| AHRR       | 4.1353    | 3.8947    | 4.52813  | 4.49849   | -0.729347 | -2.00571  |
| AHSA1      | 5.69189   | 5.68498   | 4.1663   | 4.54491   | 6.05778   | 6.16942   |
| AHSA2      | 5.0928    | 4.95335   | 5.56695  | 5.27427   | 5.07134   | 4.16194   |
| AIDA       | 4.48083   | 4.49371   | 4.50118  | 4.85515   | 4.93751   | 5.22369   |
| AIF1L      | 4.08635   | 3.63386   | -1.09576 | -0.682344 | 6.90587   | 6.87653   |
| AIFM1      | 3.25803   | 3.08019   | 4.20018  | 4.58639   | 5.08116   | 4.76394   |
| AIFM2      | 3.29952   | 3.32506   | 3.66823  | 3.98657   | 4.30619   | 3.98329   |
| AG1        | 2.46584   | 2.62992   | 3.61413  | 3.98657   | 3.73843   | 4.38207   |
| AIM1       | 1.84398   | 2.10323   | 3.98765  | 4.70894   | 5.73977   | 6.12067   |
| AIM2       | 0.54893   | -0.177293 | 0.849967 | 1.76157 ? | ?         |           |
| AIMP1      | 4.69192   | 4.72539   | 4.4226   | 4.76934   | 4.81324   | 5.22141   |
| AIMP2      | 3.74234   | 3.65859   | 3.25475  | 3.62265   | 3.90476   | 3.97615   |
| AIP        | 4.08555   | 3.83636   | 2.96623  | 3.23547   | 3.08621   | 3.51488   |
| AJ011931.1 | -1.99808  | -3.00228  | 1.05494  | 1.04098 ? | ?         |           |
| AJUBA      | 3.52973   | 3.54837   | 3.22162  | 3.7288    | 4.42516   | 4.1744    |
| AK1        | 2.8738    | 2.73549   | 2.98087  | 3.30499   | 2.45264   | 2.98418   |
| AK2        | 6.06276   | 6.12088   | 5.56022  | 6.06038   | 6.56174   | 6.66617   |
| AK3        | 4.16634   | 3.93883   | 4.77832  | 5.06146   | 6.26212   | 6.33178   |
| AK4        | 4.54736   | 4.39784   | 2.56214  | 2.80508   | 6.91106   | 5.84153   |
| AK4P1      | 1.87269   | 1.61577   | 0.407625 | 0.398963  | 3.63212   | 2.63817   |
| AK5        | 0.480917  | 0.90354   | 2.63347  | 3.54939   | 2.2254    | 2.81293   |
| AK6        | 2.59781   | 2.6392    | 2.95261  | 3.39259   | 4.01495   | 4.86921   |
| AKAP1      | 5.46392   | 5.74379   | 4.14832  | 4.55206   | 5.43009   | 5.3781    |
| AKAP10     | 3.81069   | 3.68308   | 4.54098  | 4.70415   | 4.98218   | 4.96747   |
| AKAP11     | 5.66258   | 6.0106    | 6.02134  | 6.37069   | 5.58494   | 6.22253   |
| AKAP12     | 7.02751   | 7.19285   | 1.0162   | 1.71775   | 7.87731   | 6.96303   |
| AKAP13     | 6.1659    | 6.20383   | 7.10848  | 7.15919   | 6.73811   | 6.32542   |
| AKAP17A    | 3.2449    | 3.18102   | 4.32228  | 4.47236   | 2.8962    | 2.31011   |
| AKAP2      | 5.6363    | 5.68057   | 4.91414  | 5.5826    | 6.42466   | 5.84417   |
| AKAP5      | 2.11472   | 2.25485   | 1.30837  | 1.1104    | 2.71474   | 2.92629   |
| AKAP6      | 1.10833   | 1.06859   | 4.34395  | 3.44577   | 3.26005   | 3.32396   |
| AKAP7      | 1.22578   | 1.10707   | 0.770744 | 0.935633  | 1.99792   | 2.66398   |
| AKAP8      | 3.73346   | 3.85344   | 3.26149  | 3.62926   | 4.37379   | 4.123     |
| AKAP8L     | 3.61293   | 3.53397   | 3.80578  | 3.91641   | 4.50248   | 4.05807   |
| AKAP9      | 7.28624   | 7.2518    | 7.66071  | 7.72363   | 7.66176   | 7.59435   |
| AKIP1      | 2.08557   | 2.12589   | 2.63027  | 3.08839   | 2.94887   | 3.35938   |
| AKIRIN1    | 5.2782    | 5.15554   | 4.4033   | 4.83515   | 5.86128   | 5.62978   |
| AKIRIN2    | 3.07406   | 3.15921   | 3.0308   | 2.93557   | 4.13248   | 4.25906   |
| AKNA       | 1.12115   | 1.12217   | 2.19587  | 2.47615   | 1.82756   | 1.65964   |
| AKNAD1     | 1.37778   | 1.692     | -1.01332 | -1.06415  | -2.01588  | -1.70626  |
| AKR1A1     | 3.34941   | 3.41675   | 4.30832  | 4.73508   | 4.12104   | 4.56241   |
| AKR1B1     | 7.00333   | 6.55718   | 9.3901   | 10.4202   | 6.32861   | 6.75469   |
| AKR1B10    | -3.2383   | -1.37616  | 7.59841  | 8.32719   | 1.10793   | 1.79309   |
| AKR1B10P1  | -6.68418  | -4.45968  | 3.4078   | 4.29849   | -2.75246  | -2.00571  |
| AKR1B15    | -5.10914  | -6.41219  | 2.11271  | 2.58337   | -4.07293  | -5.68708  |
| AKR1B1P1   | -0.3302   | -0.457375 | 1.9192   | 2.98323   | -0.562563 | -0.662104 |
| AKR1B1P2   | 0.582248  | 0.20969   | 2.9909   | 4.02931   | -0.274152 | 0.200291  |
| AKR1B1P7   | 0.0799481 | 0.0492125 | 2.85552  | 3.92398   | -0.440514 | -0.24095  |
| AKR1C1     | 2.47623   | 2.25005   | 8.53036  | 9.18548   | 2.85136   | 3.32359   |
| AKR1C2     | -2.02373  | -1.11652  | 8.05702  | 8.67295   | -1.47704  | -0.951362 |
| AKR1C3     | 2.41287   | 2.28779   | 6.7699   | 7.33968   | 4.81476   | 5.38874   |

|            |            |             |            |          |            |           |
|------------|------------|-------------|------------|----------|------------|-----------|
| AKR7A2     | 3.39897    | 3.24452     | 3.5962     | 3.70495  | 4.09458    | 4.40181   |
| AKT1       | 6.21833    | 5.9447      | 5.44678    | 5.75063  | 5.74126    | 5.91233   |
| AKT1S1     | 3.62314    | 3.33523     | 3.7824     | 3.79856  | 4.62751    | 4.33837   |
| AKT2       | 5.37672    | 5.21882     | 5.11797    | 5.19779  | 6.04143    | 5.97233   |
| AKT3       | 6.56479    | 6.35715     | 5.28487    | 5.38417  | 6.00478    | 5.94941   |
| AKTIP      | 2.44328    | 2.7069      | 2.86409    | 3.24425  | 3.89979    | 4.03929   |
| AL023806.1 | -0.0990262 | -0.195907   | 1.87178    | 1.77994  | 1.28225    | 0.785207  |
| AL133243.1 | 1.62288    | 1.9252      | 1.83887    | 1.42259  | 1.72342    | 0.878317  |
| AL133243.2 | 2.27535    | 2.28872     | 2.12028    | 1.69856  | 2.35093    | 2.06149   |
| AL133243.4 | 1.58636    | 1.74664     | 1.40148    | 1.195    | 1.7868     | 0.878317  |
| AL133493.2 | -3.2383    | -3.46127    | -2.27595   | -2.40763 | 1.92468    | 1.12623   |
| AL136419.6 | -0.0156236 | 0.321362    | -0.355512  | 0.112473 | 0.325651   | 0.683705  |
| AL158801.1 | 2.44652    | 2.71143     | 2.17467    | 2.66553  | 2.28238    | 2.65384   |
| AL162151.3 | 2.00034    | 1.71962     | 0.290861   | 0.770922 | 1.7571     | 2.21039   |
| AL365181.2 | 1.70486    | 1.84521     | 0.581361   | 0.719954 | 1.61667    | 0.931607  |
| AL589743.1 | 2.56303    | 2.73683     | 1.67449    | 1.71138  | 1.06767    | 0.993783  |
| AL590762.6 | -0.197398  | 0.000504855 | 0.198972   | 0.155477 | 0.00881672 | -0.212101 |
| ALAD       | 3.52129    | 3.50581     | 3.00383    | 3.4686   | 3.26599    | 3.35399   |
| ALAS1      | 4.24049    | 4.3078      | 4.75751    | 5.32162  | 4.94702    | 4.96659   |
| ALCAM      | 5.25872    | 5.04047     | 6.5749     | 6.66118  | 7.02109    | 7.54183   |
| ALDH16A1   | 2.2313     | 2.01696     | 1.39934    | 1.60032  | 2.9225     | 3.46493   |
| ALDH18A1   | 5.78978    | 5.96921     | 5.41774    | 5.81821  | 6.0268     | 6.07337   |
| ALDH1A1    | 0.388476   | 0.756391    | 3.19369    | 3.80854  | -2.75246   | -2.70579  |
| ALDH1A3    | 9.2924     | 9.47601     | 3.16129    | 3.45454  | 3.96039    | 3.95934   |
| ALDH1B1    | 3.88588    | 3.88256     | 3.74277    | 4.24542  | 5.04012    | 5.15824   |
| ALDH1L2    | 2.57169    | 2.68422     | -0.757028  | -1.06415 | 1.51964    | 1.08233   |
| ALDH2      | -4.37417   | -3.65369    | 4.32821    | 4.48176  | -5.65305 ? |           |
| ALDH3A1    | ?          | -4.87366    | 3.35564    | 4.29096  | -4.65668   | -4.70296  |
| ALDH3A2    | 4.32744    | 4.56644     | 5.84299    | 6.27916  | 5.28439    | 5.77103   |
| ALDH3B1    | 0.832372   | 0.603321    | 2.53073    | 2.95727  | 2.44823    | 3.3834    |
| ALDH4A1    | 2.21197    | 1.48315     | 1.78805    | 1.77671  | 2.14547    | 1.99765   |
| ALDH5A1    | 2.67161    | 2.57059     | 1.30034    | 0.724135 | 1.19772    | 0.597145  |
| ALDH6A1    | 2.82749    | 2.48671     | 2.70973    | 3.14556  | 2.24632    | 2.30462   |
| ALDH7A1    | 4.59581    | 4.50441     | 1.70439    | 1.92262  | 4.35474    | 4.38181   |
| ALDH7A1P1  | 3.20861    | 3.14254     | 0.388586   | 0.340232 | 2.87983    | 2.74531   |
| ALDH9A1    | 5.06787    | 4.60995     | 4.16962    | 4.09452  | 4.83853    | 4.76088   |
| ALDOA      | 7.66749    | 7.53421     | 8.49734    | 8.85328  | 9.00159    | 8.95302   |
| ALDOAP1    | 0.266817   | 0.237698    | 1.09265    | 1.72409  | 1.79504    | 1.00759   |
| ALDOAP2    | 0.0839826  | 0.456112    | 1.43857    | 1.76259  | 1.90649    | 0.924206  |
| ALDOC      | 2.1083     | 1.79457     | -0.886753  | -1.18987 | -0.0903144 | -1.18284  |
| ALG1       | 3.67263    | 3.58938     | 3.79859    | 4.22176  | 3.42604    | 3.74578   |
| ALG10      | 3.81073    | 3.92434     | 3.54987    | 3.51087  | 2.59638    | 2.05635   |
| ALG10B     | 4.07902    | 4.05951     | 4.41711    | 4.306    | 3.21052    | 2.61421   |
| ALG11      | 3.5936     | 3.5062      | 3.68111    | 3.8354   | 3.51683    | 3.42936   |
| ALG12      | 3.41743    | 3.27001     | 4.10215    | 4.12578  | 2.90728    | 2.64384   |
| ALG13      | 2.52493    | 2.70709     | 3.73236    | 3.63095  | 4.79141    | 4.54239   |
| ALG14      | 2.24931    | 2.3413      | 2.30031    | 2.68234  | 2.56129    | 3.11984   |
| ALG1L15P   | 0.121188   | 0.124196    | -0.0361309 | 0.742894 | -0.087485  | -0.105554 |
| ALG2       | 3.8284     | 3.82025     | 3.77647    | 4.15327  | 3.59709    | 3.28481   |
| ALG3       | 3.51767    | 3.33319     | 3.66039    | 4.12718  | 4.10704    | 4.3045    |
| ALG5       | 3.61946    | 3.58292     | 3.17403    | 3.55117  | 3.27633    | 3.87071   |
| ALG6       | 4.87928    | 4.44854     | 3.42011    | 3.42256  | 3.2116     | 3.49786   |

|            |             |            |            |           |           |           |
|------------|-------------|------------|------------|-----------|-----------|-----------|
| ALG8       | 6.1165      | 6.10935    | 5.02653    | 5.34392   | 4.48051   | 4.69949   |
| ALG9       | 2.34945     | 2.27519    | 3.85851    | 4.09758   | 4.05099   | 3.78154   |
| ALK        | 1.24348     | 1.44408    | -0.482896  | -0.154483 | 0.258664  | -0.31423  |
| ALKBH1     | 2.63855     | 2.65611    | 1.74132    | 1.91357   | 2.52209   | 2.677     |
| ALKBH2     | 4.01344     | 4.12305    | 1.75902    | 1.87419   | 3.16942   | 3.3781    |
| ALKBH3     | 2.41467     | 2.30866    | 2.7413     | 3.11548   | 3.22081   | 3.33221   |
| ALKBH4     | 2.73474     | 2.77691    | 1.9762     | 2.17936   | 2.57728   | 2.98766   |
| ALKBH5     | 5.10816     | 5.01997    | 5.38866    | 5.76261   | 6.55962   | 6.11301   |
| ALKBH6     | 1.867       | 1.614      | 2.65254    | 2.70175   | 2.46641   | 2.05486   |
| ALKBH7     | -0.00787984 | -0.58      | -0.223662  | 0.404816  | 0.904997  | 1.93717   |
| ALKBH8     | 2.02886     | 2.28536    | 2.75018    | 3.00752   | 3.66499   | 4.16211   |
| ALMS1      | 6.45522     | 6.37164    | 5.48578    | 5.43708   | 5.84597   | 5.86501   |
| ALMS1-IT1  | 1.17748     | 1.10707    | 1.48894    | 1.2041    | 0.185296  | -0.4586   |
| ALOX12-AS1 | 0.636395    | 0.44211    | 1.7435     | 1.80287   | 1.05066   | 0.597145  |
| ALOX12P2   | 0.278306    | 0.491443   | 2.80517    | 2.58118   | 1.37865   | 0.0213376 |
| ALPK1      | 2.77095     | 2.75651    | 4.04409    | 4.13672   | 3.27361   | 3.42735   |
| ALPK2      | -0.740601   | -1.14333   | 8.00204    | 8.1335    | 7.05739   | 6.82462   |
| ALPK3      | -2.23898    | -1.93875   | -1.93506   | -2.10822  | 2.3227    | 1.80902   |
| ALS2       | 4.80871     | 4.85343    | 4.84092    | 5.0062    | 5.1004    | 4.77204   |
| ALX4       | -2.9975     | -3.13966   | 3.7128     | 4.0256    | -1.61549  | -2.12114  |
| ALYREF     | 5.63938     | 5.55744    | 4.53243    | 4.86988   | 5.82803   | 5.96173   |
| AMACR      | 2.99899     | 3.67905    | 2.38194    | 2.79491   | 2.69881   | 3.19451   |
| AMBRA1     | 4.35281     | 4.21575    | 4.56383    | 4.55383   | 4.52207   | 3.94253   |
| AMD1       | 6.33818     | 6.27748    | 5.5903     | 5.99285   | 7.53334   | 7.59038   |
| AMD1P3     | -0.501561   | -0.207583  | -0.568651  | -0.342526 | 0.658554  | 0.834112  |
| AMDHD2     | 2.52316     | 2.01545    | 2.55105    | 2.587     | 2.13057   | 2.13223   |
| AMER1      | 3.21231     | 3.20428    | 4.06083    | 4.13672   | 3.08957   | 2.83632   |
| AMFR       | 5.34886     | 5.51473    | 6.17923    | 6.50382   | 6.84103   | 6.7671    |
| AMIGO1     | 2.24345     | 2.06466    | -2.37543   | -2.52305  | 2.23149   | 1.76092   |
| AMIGO2     | 4.47329     | 4.75109    | 4.40508    | 4.98224   | 5.52277   | 5.62159   |
| AMMECR1    | 4.25728     | 4.26167    | 3.93671    | 4.12599   | 5.82096   | 5.60219   |
| AMMECR1L   | 4.95853     | 4.92549    | 3.91778    | 4.00151   | 4.47761   | 4.11027   |
| AMN1       | 2.1248      | 2.08533    | 1.81671    | 2.09876   | 2.22065   | 2.71013   |
| AMOT       | 3.69324     | 3.70079    | 4.50735    | 4.51596   | 5.10041   | 5.37141   |
| AMOTL1     | 6.51094     | 6.81982    | 5.83745    | 5.86666   | 4.83606   | 4.93354   |
| AMOTL2     | 4.51197     | 4.51144    | 5.02278    | 5.41051   | 5.90046   | 5.57436   |
| AMPD1      | -5.69162    | -6.45019 ? | ?          |           | 3.75013   | 3.64201   |
| AMPD2      | 4.45415     | 4.32017    | 5.33039    | 5.5233    | 5.36578   | 4.93119   |
| AMPD3      | 0.207918    | 0.603321   | 2.88526    | 3.31744   | -0.374735 | 0.615294  |
| AMT        | 0.61388     | 0.537236   | 1.67449    | 1.54226   | 1.2586    | 0.483199  |
| AMZ1       | 0.0692347   | -0.177294  | 1.32432    | 1.04098   | -0.338214 | -1.79933  |
| AMZ2       | 4.02485     | 4.02589    | 4.29688    | 4.70123   | 4.69604   | 5.32323   |
| AMZ2P1     | 1.42883     | 1.26602    | 0.929693   | 0.833756  | 1.61119   | 1.89545   |
| ANAPC1     | 6.24131     | 6.26695    | 5.48301    | 5.79973   | 6.0671    | 6.0803    |
| ANAPC10    | 2.1768      | 2.00285    | 2.07245    | 2.19561   | 2.17064   | 2.69441   |
| ANAPC10P1  | -0.0370305  | 0.0806986  | -0.0413934 | 0.0777215 | -0.137246 | 0.563998  |
| ANAPC11    | 3.86195     | 3.81481    | 3.0994     | 3.50743   | 4.46563   | 5.47495   |
| ANAPC13    | 3.86975     | 3.74846    | 3.58464    | 4.05512   | 3.65678   | 4.29757   |
| ANAPC15    | 3.49883     | 3.27138    | 2.60377    | 2.87613   | 3.14353   | 3.34133   |
| ANAPC16    | 4.22764     | 4.2502     | 3.94285    | 4.18674   | 5.22391   | 5.56806   |
| ANAPC2     | 3.09209     | 2.98631    | 3.29828    | 3.39698   | 2.85539   | 2.63759   |
| ANAPC4     | 3.82349     | 3.95394    | 3.40519    | 3.65106   | 4.11365   | 4.4005    |

|                 |            |           |            |           |            |             |
|-----------------|------------|-----------|------------|-----------|------------|-------------|
| ANAPC5          | 6.18339    | 6.20081   | 5.72261    | 6.04534   | 5.97562    | 6.28004     |
| ANAPC7          | 5.02794    | 5.26716   | 4.4872     | 4.91242   | 4.5591     | 4.87541     |
| ANGEL1          | 3.43409    | 3.30122   | 2.71148    | 2.9938    | 2.95117    | 2.89816     |
| ANGEL2          | 3.38174    | 3.6019    | 4.30832    | 4.4515    | 4.64974    | 4.86218     |
| ANGPT1          | 2.63409    | 2.26509   | 6.74868    | 6.77323   | 3.42582    | 4.23286     |
| ANGPT2          | 2.02204    | 2.08021   | 1.51       | 1.51326   | 3.20233    | 2.84019     |
| ANGPTL1         | 1.78879    | 1.40138   | -1.37581   | -0.979274 | 0.282309   | -0.0341529  |
| ANGPTL2         | 3.26959    | 3.01289   | 2.4422     | 2.13437   | -0.827177  | -1.18284    |
| ANGPTL3         | 0.676033   | 0.831845  | 0.793829   | 0.383121  | 0.134221   | -1.006      |
| ANK2            | 3.06414    | 3.62594   | -2.01303   | -1.58485  | 4.61465    | 5.11425     |
| ANK3            | 4.10172    | 4.24076   | 3.89261    | 3.70615   | 5.12979    | 5.13374     |
| ANKAR           | 0.792847   | 0.804012  | -0.276471  | -0.436219 | 0.983605   | 0.847941    |
| ANKDD1A         | -0.289348  | -0.484239 | 1.58948    | 1.62928   | -0.337166  | -1.24696    |
| ANKEF1          | 0.885949   | 0.929533  | 1.5913     | 1.92462   | 2.58288    | 2.52211     |
| ANKFN1          | 0.133932   | 0.676782  | 0.558032   | 0.176693  | -0.0752099 | -0.00614162 |
| ANKFY1          | 4.72412    | 5.02998   | 5.64986    | 6.18284   | 5.65989    | 5.76234     |
| ANKH            | 4.81513    | 4.77077   | 4.00506    | 4.01659   | 4.56369    | 4.20318     |
| ANKHD1          | 5.64386    | 5.61247   | 6.39657    | 6.27489   | 5.47311    | 5.2484      |
| ANKHD1-EIF4EBP: | 4.54154    | 4.34513   | 4.80547    | 4.84557   | 4.15548    | 4.08183     |
| ANKIB1          | 6.13103    | 6.12164   | 7.25006    | 7.45423   | 6.25556    | 6.26556     |
| ANKLE2          | 6.32049    | 6.44929   | 5.79304    | 6.11003   | 5.85414    | 5.62924     |
| ANKMY1          | 2.98635    | 2.83424   | 2.79948    | 2.73353   | 2.44695    | 2.04819     |
| ANKMY2          | 3.03733    | 3.11269   | 3.97635    | 4.27593   | 3.76699    | 4.14661     |
| ANKRA2          | 1.82002    | 1.84552   | 2.56468    | 2.72373   | 3.17889    | 3.50556     |
| ANKRD1          | -1.45077   | -1.76193  | 1.26773    | 1.51326   | 2.27044    | 1.80111     |
| ANKRD10         | 5.21305    | 5.27651   | 4.72936    | 4.88269   | 5.52269    | 4.88387     |
| ANKRD10-IT1     | 1.8934     | 2.06074   | 2.09727    | 1.97335   | 2.44823    | 0.100762    |
| ANKRD11         | 6.07338    | 5.90154   | 6.21403    | 6.01088   | 5.69843    | 5.02871     |
| ANKRD12         | 4.39234    | 4.26842   | 5.28527    | 5.17584   | 5.78091    | 5.73493     |
| ANKRD13A        | 4.79069    | 4.88386   | 4.36576    | 4.73695   | 4.6901     | 4.8443      |
| ANKRD13B        | 2.09535    | 2.03702   | 1.62387    | 1.59857   | 2.38955    | 2.10709     |
| ANKRD13C        | 4.54409    | 4.1417    | 4.82699    | 4.80183   | 4.86274    | 4.55067     |
| ANKRD13D        | 3.62172    | 3.46197   | 3.64143    | 3.80406   | 3.22691    | 2.74451     |
| ANKRD16         | 0.398274   | 0.676782  | -0.0381633 | -0.285363 | 0.314058   | -0.252367   |
| ANKRD17         | 6.6841     | 6.57676   | 6.43691    | 6.52847   | 7.61521    | 7.37414     |
| ANKRD18EP       | 1.57708    | 1.63522   | 1.16526    | 1.2921    | 1.99076    | 1.46325     |
| ANKRD20A17P     | -0.207091  | -0.302468 | 1.79379    | 1.63108   | -2.02517   | -1.96079    |
| ANKRD26         | 3.4895     | 3.44404   | 4.45491    | 4.31429   | 3.8255     | 3.51488     |
| ANKRD27         | 4.36969    | 4.2219    | 4.61737    | 4.86558   | 4.96813    | 4.93443     |
| ANKRD28         | 6.61648    | 6.59987   | 5.96621    | 6.45626   | 5.9017     | 6.12932     |
| ANKRD29         | -0.0695851 | 0.060836  | 0.711372   | 1.43037   | -2.20023   | -1.12145    |
| ANKRD30A        | 1.49078    | 2.21313   | -4.59508 ? | ?         |            | -4.70296    |
| ANKRD30B        | -4.0473    | -3.28251  | -0.768941  | -1.08276  | 1.08464    | 1.80155     |
| ANKRD33B        | 3.39764    | 3.26337   | 4.32723    | 4.014     | 3.12105    | 2.39658     |
| ANKRD36         | 4.88699    | 5.06175   | 4.19144    | 4.10333   | 4.47937    | 4.40115     |
| ANKRD36B        | 4.07361    | 4.1044    | 3.46085    | 3.26415   | 3.4772     | 3.22373     |
| ANKRD36BP1      | 0.639417   | 1.89637   | 0.184737   | 0.353414  | 0.944034   | -7.21644    |
| ANKRD36C        | 4.51519    | 4.6035    | 4.39652    | 4.30337   | 3.87911    | 3.87559     |
| ANKRD37         | -0.0426158 | -0.13667  | -0.49899   | 0.456323  | 1.96808    | 1.96459     |
| ANKRD39         | 2.74063    | 2.72438   | 2.46424    | 2.34733   | 2.91965    | 2.7267      |
| ANKRD40         | 5.64521    | 5.68657   | 4.97886    | 5.30479   | 5.49481    | 5.52929     |
| ANKRD42         | 1.99586    | 1.885     | 2.91196    | 2.91828   | 2.25009    | 1.98475     |

|             |           |           |           |            |            |             |
|-------------|-----------|-----------|-----------|------------|------------|-------------|
| ANKRD44     | 3.3804    | 3.47085   | 2.60439   | 2.12481    | 3.01565    | 2.52692     |
| ANKRD46     | 2.52064   | 2.3632    | 2.70123   | 2.4475     | 2.82059    | 2.33844     |
| ANKRD49     | 2.01774   | 1.95676   | 3.09422   | 3.22385    | 2.30299    | 2.8295      |
| ANKRD50     | 5.1507    | 5.11175   | 5.71506   | 5.36233    | 6.21445    | 6.51697     |
| ANKRD52     | 5.49905   | 5.53715   | 5.41312   | 5.44767    | 5.67898    | 5.62867     |
| ANKRD54     | 3.92269   | 3.80229   | 3.70118   | 3.82327    | 3.64699    | 3.23155     |
| ANKRD6      | 2.78135   | 2.60469   | -2.21134  | -2.24213   | -0.544285  | -0.72027    |
| ANKRD61     | 0.278306  | 0.456112  | 0.64945   | 0.399062   | 0.0402612  | -0.662104   |
| ANKRD9      | 3.49003   | 3.36404   | 2.06442   | 2.13891    | 2.43916    | 1.99584     |
| ANKS1A      | 3.83327   | 3.69576   | 3.01124   | 3.09819    | 4.36621    | 4.23139     |
| ANKS3       | 2.79678   | 2.82487   | 2.73833   | 2.87417    | 2.89044    | 3.00754     |
| ANKS6       | 4.1131    | 3.98629   | 3.56131   | 3.37297    | 2.5637     | 2.13251     |
| ANKZF1      | 4.27246   | 4.16285   | 4.39579   | 4.61397    | 5.92346    | 4.63424     |
| ANLN        | 7.75931   | 7.78677   | 7.36634   | 7.94617    | 7.48153    | 7.75249     |
| ANO10       | 4.73214   | 4.69849   | 4.23817   | 4.67453    | 4.78936    | 5.37447     |
| ANO5        | 2.36433   | 2.34452   | -0.69145  | -1.06415   | -6.64581 ? |             |
| ANO6        | 6.44063   | 6.63075   | 6.00193   | 6.40291    | 6.08387    | 5.80453     |
| ANO7        | 0.367103  | 0.278722  | 0.292311  | -0.52367   | 1.76598    | 0.33778     |
| ANO8        | 1.06253   | 0.894767  | 1.43123   | 1.35064    | 2.35094    | 1.95865     |
| ANP32A      | 5.99431   | 5.63945   | 5.83374   | 5.69943    | 6.04422    | 5.27064     |
| ANP32AP1    | 1.92649   | 1.74358   | 1.2947    | 1.1781     | 1.7637     | 1.13196     |
| ANP32B      | 4.78623   | 4.43163   | 3.76495   | 3.70664    | 3.84673    | 3.73718     |
| ANP32BP1    | 1.06264   | 0.950439  | 0.38531   | 0.333344   | 0.118014   | 0.305515    |
| ANP32E      | 6.6112    | 6.88672   | 5.5726    | 5.91664    | 6.41462    | 6.09174     |
| ANTXR1      | 5.37272   | 5.38303   | 6.66723   | 6.58727    | 5.27668    | 5.47815     |
| ANTXR2      | 3.24636   | 3.51586   | 3.70978   | 4.11034    | 3.02093    | 3.51487     |
| ANXA1       | 7.22469   | 6.9009    | 6.93219   | 7.55429    | 7.28309    | 8.08547     |
| ANXA11      | 5.00265   | 4.92677   | 5.55076   | 6.0111     | 5.11075    | 5.2569      |
| ANXA2       | 8.42938   | 8.26113   | 7.95829   | 8.25389    | 9.68175    | 10.02       |
| ANXA2P1     | 2.82683   | 2.86264   | 2.45819   | 2.76408    | 3.97929    | 4.07827     |
| ANXA2P2     | 8.23173   | 8.1271    | 7.92146   | 8.15903    | 9.46123    | 9.88681     |
| ANXA2P3     | 1.41022   | 1.57079   | 1.16558   | 1.57091    | 3.09279    | 2.85189     |
| ANXA2R      | 0.178249  | 0.186057  | 1.72599   | 1.86848    | 1.02216    | 1.27061     |
| ANXA3       | -6.68418  | -3.87578  | -2.37543  | -4.10635   | 0.901996   | 1.95152     |
| ANXA4       | 2.73347   | 3.00272   | 4.28916   | 4.90169    | 3.3098     | 3.84018     |
| ANXA5       | 6.56036   | 6.54892   | 6.92172   | 7.52075    | 6.92279    | 7.23874     |
| ANXA6       | 4.75932   | 4.52796   | 7.05622   | 7.44982    | -0.959604  | -1.24695    |
| ANXA7       | 5.12386   | 5.28159   | 4.97575   | 5.55492    | 5.62251    | 5.82252     |
| ANXA9       | -0.943927 | -1.33321  | 0.544485  | 1.14862    | 0.0677351  | -0.247123   |
| AOC1        | -4.69535  | -4.87366  | 1.26773   | 2.42646 ?  |            | ?           |
| AOC2        | 0.586404  | 0.645757  | -0.401986 | -0.823182  | 0.405873   | -0.0341529  |
| AOX1        | -1.48924  | -1.2146   | 0.259532  | 1.62592    | -0.729347  | 0.33778     |
| AP000275.65 | 0.0915306 | 0.266337  | -0.220818 | 0.253372   | 0.801779   | -1.79157    |
| AP000347.2  | 2.96318   | 2.85636   | 2.66739   | 2.72403    | 2.11392    | 0.698814    |
| AP000350.5  | 0.727258  | 0.635262  | 2.96369   | 2.9383     | 2.8962     | 2.28766     |
| AP000350.6  | 0.183671  | 0.514521  | 1.26048   | 1.40773    | 1.28225    | 0.9808      |
| AP000357.4  | -0.239069 | -0.193003 | -0.183372 | 0.248838   | 0.522297   | 0.293394    |
| AP000462.1  | 1.21386   | 1.00482   | -0.276471 | -0.0426024 | -0.0602604 | -0.00614162 |
| AP000472.2  | 1.84398   | 1.67674   | -4.18092  | -4.52056   | -6.64581 ? |             |
| AP000473.8  | ?         | -6.45019  | -5.1783 ? |            | 1.30552    | 1.90064     |
| AP000487.5  | 1.08629   | 1.16749   | 0.680756  | 0.947561   | -0.0543249 | -0.123535   |
| AP000560.3  | 1.14018   | 1.15192   | 2.05012   | 1.87988    | -0.0602604 | -0.899103   |

|             |           |           |           |              |            |           |
|-------------|-----------|-----------|-----------|--------------|------------|-----------|
| AP000577.2  | 0.54893   | 0.395227  | 0.838911  | 0.445854     | -0.0602604 | -1.18284  |
| AP000648.5  | 3.1227    | 3.05286   | 4.23643   | 4.26403      | 3.33545    | 2.9515    |
| AP000705.8  | 2.21383   | 1.93378   | -5.1783   | -6.09892 ?   | ?          |           |
| AP000892.6  | 1.53901   | 1.44831   | 1.66031   | 1.84545      | 2.17682    | 1.66884   |
| AP001062.7  | -0.200124 | -0.280876 | 1.20587   | 1.03072      | -0.0471521 | -0.55378  |
| AP001258.4  | 0.0568748 | 0.137189  | 0.675003  | 1.10068      | 0.0129405  | 0.270672  |
| AP001372.2  | 0.768595  | 1.11463   | 0.431281  | 0.457563     | -0.320295  | -0.121607 |
| AP001442.2  | 0.50068   | 0.656176  | 1.8772    | 1.39106      | 0.799187   | -0.247125 |
| AP001469.9  | 0.458655  | 0.794986  | 0.942428  | 1.2999       | 0.341758   | 0.0359335 |
| AP003900.6  | 3.257     | 3.42551   | 1.90581   | 1.77322      | -6.64581 ? |           |
| AP006621.5  | 0.0152977 | -0.105152 | 1.15638   | 1.2921       | -1.20056   | -2.8983   |
| AP1AR       | 3.4302    | 3.58972   | 2.90394   | 3.27488      | 3.6571     | 3.97452   |
| AP1B1       | 5.57034   | 5.3795    | 5.32328   | 5.54221      | 5.703      | 5.62363   |
| AP1G1       | 5.65983   | 5.84691   | 6.30756   | 6.61782      | 6.77915    | 7.12913   |
| AP1G2       | 2.9525    | 2.50874   | 3.00034   | 3.00602      | 2.80186    | 2.54044   |
| AP1M1       | 4.36565   | 4.21927   | 3.74277   | 4.13196      | 5.41079    | 5.46321   |
| AP1S1       | 4.94659   | 5.05481   | 3.80232   | 4.36993      | 4.6297     | 5.36406   |
| AP1S2       | 4.60185   | 4.61169   | 3.66572   | 3.86998      | 4.0227     | 3.97025   |
| AP1S3       | 0.510456  | 0.877069  | -0.455418 | -0.201784    | 2.19458    | 2.25331   |
| AP2A1       | 4.18023   | 3.31448   | 4.85338   | 4.56277      | 4.97965    | 4.23641   |
| AP2A2       | 4.80325   | 4.77555   | 4.81788   | 5.13196      | 4.1891     | 4.45693   |
| AP2B1       | 6.51957   | 6.7867    | 6.7804    | 7.12642      | 7.39145    | 7.43245   |
| AP2M1       | 6.0937    | 6.01489   | 6.92726   | 7.29694      | 8.15669    | 8.45367   |
| AP2S1       | 4.9193    | 4.7356    | 4.65882   | 5.05167      | 5.86151    | 6.21029   |
| AP3B1       | 5.0982    | 5.12783   | 5.74459   | 5.8957       | 5.71604    | 5.85514   |
| AP3B2       | 2.71878   | 2.41061   | 3.22799   | 3.2288       | -3.48878   | -4.70296  |
| AP3D1       | 5.37202   | 5.11172   | 5.39909   | 5.61696      | 6.22289    | 5.73984   |
| AP3M1       | 4.99394   | 5.02749   | 4.83311   | 5.20724      | 5.77796    | 5.70518   |
| AP3M2       | 3.86125   | 4.08599   | 3.12709   | 3.4515       | 3.41116    | 3.22992   |
| AP3S1       | 4.25304   | 4.34464   | 4.46689   | 4.9216       | 4.61019    | 5.06422   |
| AP3S2       | 4.49101   | 4.47739   | 4.70918   | 4.99156      | 4.25644    | 4.32204   |
| AP4B1       | 3.96359   | 4.10033   | 3.4773    | 3.74918      | 3.52178    | 3.78554   |
| AP4B1-AS1   | 0.500639  | 0.559746  | 0.301002  | -0.000493486 | -0.28093   | -0.287003 |
| AP4E1       | 4.41726   | 4.39357   | 3.81224   | 4.23989      | 4.62336    | 4.4519    |
| AP4M1       | 2.82547   | 2.69694   | 2.17065   | 2.45536      | 2.44135    | 2.62755   |
| AP4S1       | 1.85937   | 1.88148   | 1.47473   | 1.7241       | 1.87499    | 2.26485   |
| AP5B1       | 3.85742   | 3.70081   | 3.07858   | 3.27055      | 2.81137    | 2.61523   |
| AP5M1       | 4.57704   | 4.69386   | 3.67911   | 4.08223      | 4.99297    | 5.28692   |
| AP5S1       | 2.98781   | 2.84913   | 3.65049   | 3.77043      | 3.06509    | 3.09027   |
| AP5Z1       | 2.27248   | 1.97597   | 3.05727   | 3.12958      | 2.77433    | 2.74038   |
| APAF1       | 4.12338   | 4.11703   | 4.07029   | 4.17883      | 3.6799     | 3.40437   |
| APBA1       | 2.85167   | 2.41369   | -3.59683  | -4.10635     | 1.88274    | 1.55071   |
| APBA2       | -4.37417  | -4.13839  | 3.9393    | 4.30477      | 2.02621    | 2.17595   |
| APBA3       | 2.10845   | 1.89912   | 1.31926   | 1.57771      | 2.19518    | 2.25025   |
| APBB1       | 3.84394   | 3.51729   | 1.14744   | 1.12963      | 2.39769    | 2.38077   |
| APBB2       | 4.58862   | 4.72139   | 4.37202   | 4.51961      | 6.54944    | 6.07913   |
| APBB3       | 2.3524    | 2.42598   | 2.4113    | 2.37407      | 2.84543    | 2.30261   |
| APC         | 6.47065   | 6.52937   | 6.26588   | 6.50588      | 7.00823    | 7.17116   |
| APC2        | 0.0483618 | -0.312413 | 0.847243  | 0.39765      | 0.442142   | 0.434081  |
| APCDD1L     | 5.56711   | 5.57263   | -0.276471 | 0.139221     | 1.47928    | 2.21217   |
| APCDD1L-AS1 | 4.50426   | 4.31687   | 1.33222   | 2.07607      | 1.71041    | 2.52692   |
| APEH        | 5.46518   | 5.43044   | 4.63105   | 4.93761      | 5.81314    | 6.22881   |



|          |          |           |            |          |            |           |
|----------|----------|-----------|------------|----------|------------|-----------|
| APEX1    | 5.45192  | 5.25138   | 4.34394    | 4.59853  | 5.03838    | 4.99977   |
| APEX2    | 3.57588  | 3.49571   | 2.42751    | 2.8337   | 3.25258    | 3.36206   |
| APH1A    | 6.1474   | 6.06618   | 5.31624    | 5.71302  | 6.0206     | 6.66156   |
| APH1B    | 3.46456  | 3.22366   | 3.53757    | 3.70014  | 2.77224    | 2.65085   |
| API5     | 5.83256  | 5.91059   | 5.38341    | 5.84541  | 6.4053     | 6.55214   |
| API5P1   | 2.8681   | 3.17856   | 2.6097     | 3.03545  | 3.47125    | 3.6164    |
| APIP     | 3.27334  | 3.17811   | 3.12682    | 3.16327  | 1.23865    | 1.51767   |
| APITD1   | 2.19151  | 2.21439   | 2.10905    | 2.40558  | 2.45213    | 3.18744   |
| APLF     | 2.21682  | 2.37322   | 1.80519    | 2.01543  | -3.33694   | -1.89883  |
| APLP1    | 3.1115   | 3.00068   | 3.12482    | 3.16264  | 0.351018   | 0.752791  |
| APLP2    | 7.71593  | 7.70933   | 7.24558    | 7.60198  | 8.52511    | 8.22063   |
| APMAP    | 7.71879  | 7.80287   | 6.27672    | 6.74878  | 6.71346    | 7.10212   |
| APOA1BP  | 4.68407  | 4.84093   | 4.01737    | 4.33411  | 4.86471    | 5.5239    |
| APOBEC3B | 3.981    | 3.97273   | 4.47798    | 4.74985  | -3.46323   | -5.69922  |
| APOBEC3C | 3.09696  | 3.18785   | 4.35951    | 4.78068  | 3.0262     | 3.64643   |
| APOBEC3D | 0.290554 | 0.0622599 | 2.11513    | 2.10054  | -1.94632   | -2.71249  |
| APOBEC3F | 0.116325 | 0.0603656 | 2.40349    | 2.48714  | 0.258688   | 0.741601  |
| APOBEC3G | 0.86443  | 0.594147  | 4.69749    | 5.13155  | -0.2406    | 0.57353   |
| APOBEC4  | 0.586404 | 0.444137  | 0.73541    | 0.773887 | -0.152369  | 0.0483059 |
| APOD     | 2.87268  | 3.44705   | -4.59508   | -3.78492 | -5.65305 ? |           |
| APOL1    | 1.58172  | 1.53154   | 5.16354    | 5.50634  | -0.184426  | -0.577229 |
| APOL2    | 3.29102  | 3.40752   | 4.7916     | 5.40191  | 4.1029     | 3.70479   |
| APOL3    | -3.2383  | -1.65505  | 3.41266    | 4.23212  | -0.393349  | -0.214706 |
| APOL6    | 3.66067  | 4.13054   | 5.87175    | 6.45769  | 4.5751     | 5.01523   |
| APOLD1   | 1.86768  | 1.9762    | 3.36262    | 3.68005  | 2.58272    | 2.35429   |
| APOO     | 1.67557  | 1.66131   | 1.94572    | 2.39897  | 2.30813    | 2.82355   |
| APOOL    | 2.73746  | 2.9159    | 2.67758    | 3.00752  | 3.24788    | 3.62868   |
| APOPT1   | 2.23519  | 2.27787   | 1.99853    | 2.19512  | 3.1494     | 3.65682   |
| APP      | 8.15871  | 7.9539    | 8.65247    | 8.69868  | 8.43522    | 7.70478   |
| APPBP2   | 4.97688  | 5.08982   | 5.01122    | 5.26946  | 5.76121    | 6.23431   |
| APPL1    | 5.58972  | 5.779     | 4.90591    | 5.19941  | 6.41239    | 6.29608   |
| APPL2    | 4.22795  | 4.30698   | 3.24484    | 3.377    | 3.63545    | 3.94074   |
| APRT     | 4.36431  | 3.90238   | 3.80799    | 4.07728  | 4.26227    | 4.44809   |
| APTR     | 1.52496  | 1.49139   | 1.75902    | 1.83372  | 1.57335    | 1.23585   |
| APTX     | 3.67921  | 3.85117   | 3.3498     | 3.82486  | 4.56006    | 5.13169   |
| AQP11    | 1.49572  | 1.67674   | 0.699196   | 0.632715 | 1.09463    | 1.25912   |
| AQR      | 5.91148  | 5.99118   | 5.42149    | 5.57766  | 5.21619    | 5.33082   |
| AR       | -5.10914 | -4.13839  | 5.31828    | 5.28133  | 5.24507    | 5.25908   |
| ARAF     | 3.85263  | 3.69829   | 3.06678    | 3.34445  | 3.87884    | 4.00924   |
| ARAP1    | 4.0098   | 3.51215   | 4.49085    | 4.56897  | 4.02734    | 3.88353   |
| ARAP2    | 3.25075  | 3.57333   | -6.17309 ? |          | -6.64581 ? |           |
| ARAP3    | 4.11951  | 4.25654   | 3.87175    | 3.93008  | 3.48052    | 3.6398    |
| ARCN1    | 5.95799  | 5.79338   | 6.35245    | 6.69349  | 6.28123    | 6.17443   |
| AREL1    | 5.95402  | 5.90621   | 4.48624    | 4.67825  | 5.80701    | 5.50517   |
| ARF1     | 6.31822  | 6.27083   | 6.3986     | 6.81834  | 6.82797    | 6.97926   |
| ARF3     | 6.0491   | 5.9701    | 5.72822    | 6.143    | 5.91788    | 6.04899   |
| ARF4     | 6.24183  | 6.00013   | 6.15027    | 6.46822  | 6.96947    | 6.65468   |
| ARF4P1   | 1.26881  | 1.2314    | 1.19157    | 1.42459  | 1.97729    | 2.00067   |
| ARF5     | 4.52238  | 4.43858   | 3.92522    | 4.13404  | 4.11345    | 4.71274   |
| ARF6     | 5.6004   | 5.55221   | 4.75164    | 5.03773  | 5.18909    | 5.10224   |
| ARFGAP1  | 5.35957  | 5.14354   | 4.97066    | 5.13314  | 5.05735    | 5.07628   |
| ARFGAP2  | 4.71439  | 4.62293   | 4.81268    | 4.95072  | 5.20133    | 5.18029   |

|             |           |           |           |           |            |           |
|-------------|-----------|-----------|-----------|-----------|------------|-----------|
| ARFGAP3     | 4.31411   | 4.56016   | 4.09725   | 4.54581   | 4.47026    | 5.0058    |
| ARFGEF1     | 5.6199    | 5.76745   | 6.10515   | 6.29755   | 5.66534    | 6.0869    |
| ARFGEF2     | 6.72271   | 6.80203   | 6.21414   | 6.69469   | 6.11385    | 6.21363   |
| ARFGEF3     | 2.91747   | 3.29037   | 0.503064  | 1.46107   | 5.28439    | 4.91075   |
| ARFIP1      | 4.20555   | 4.20604   | 3.77936   | 4.22544   | 4.37929    | 4.60956   |
| ARFIP2      | 5.42179   | 5.29202   | 4.4275    | 4.88481   | 5.32483    | 5.77759   |
| ARFRP1      | 4.52613   | 4.45004   | 4.23853   | 4.49665   | 3.89043    | 4.00925   |
| ARG2        | 3.38873   | 3.19515   | 2.47066   | 2.90422   | 3.95993    | 4.34876   |
| ARGLU1      | 5.22126   | 5.18596   | 5.56004   | 5.43419   | 5.40711    | 4.90245   |
| ARHGAP1     | 4.14719   | 4.13334   | 3.99887   | 4.37297   | 5.04748    | 4.99459   |
| ARHGAP10    | 3.35348   | 3.29204   | 3.53587   | 3.45913   | 3.51461    | 3.52211   |
| ARHGAP11A   | 6.37499   | 6.45564   | 5.67105   | 5.96854   | 5.55847    | 5.53791   |
| ARHGAP11B   | 4.85701   | 4.89626   | 4.24451   | 4.36464   | 4.06414    | 3.3387    |
| ARHGAP12    | 6.01017   | 5.98213   | 4.93541   | 5.23101   | 5.28841    | 5.74037   |
| ARHGAP17    | 3.74903   | 3.67925   | 4.57885   | 4.56359   | 3.70382    | 3.37543   |
| ARHGAP18    | 3.80574   | 4.04197   | 4.51431   | 5.03263   | 5.6483     | 6.1824    |
| ARHGAP19    | 4.59897   | 4.60973   | 3.89195   | 3.95994   | 4.22613    | 4.41681   |
| ARHGAP20    | -1.61119  | -1.55554  | 1.88259   | 1.13916   | -5.07051   | -4.11926  |
| ARHGAP21    | 6.47277   | 6.33422   | 5.93325   | 6.19407   | 6.49896    | 6.20819   |
| ARHGAP22    | -2.1135   | -1.93875  | 1.20023   | 1.94105   | 1.67957    | 1.43288   |
| ARHGAP23    | 1.56656   | 0.849663  | 3.64201   | 3.42962   | 2.10789    | 1.53173   |
| ARHGAP24    | 2.39801   | 1.98016   | 1.05741   | 0.834744  | 2.70745    | 3.17957   |
| ARHGAP26    | 3.36836   | 3.60324   | 3.05727   | 3.26404   | 6.07525    | 5.39393   |
| ARHGAP27    | 1.60474   | 1.10707   | 0.860939  | 1.07114   | -0.0322677 | 0.315752  |
| ARHGAP28    | -0.24304  | -0.177294 | 5.58353   | 5.63724 ? |            | -5.69922  |
| ARHGAP29    | 6.05602   | 6.07192   | 5.84576   | 6.1462    | 7.44881    | 7.39787   |
| ARHGAP31    | 4.92479   | 5.20913   | 4.59701   | 4.83807   | 4.19065    | 4.51969   |
| ARHGAP32    | 4.5512    | 4.59311   | 4.75164   | 4.77152   | 5.31518    | 5.2677    |
| ARHGAP33    | 0.0954519 | -0.354151 | 1.77651   | 1.55655   | 0.270529   | -0.536593 |
| ARHGAP35    | 6.78764   | 6.77662   | 6.70424   | 6.83896   | 6.98703    | 6.61182   |
| ARHGAP39    | 0.146525  | -0.418273 | 0.770744  | 0.28359   | 0.815493   | 0.33778   |
| ARHGAP42    | 0.639232  | 0.675861  | 4.11238   | 4.09312   | -1.70566   | -2.53597  |
| ARHGAP5     | 7.5745    | 7.62632   | 5.92013   | 5.93171   | 6.5555     | 6.96633   |
| ARHGAP5-AS1 | 2.59185   | 2.78747   | -0.110041 | -0.131402 | 0.0181214  | -0.706491 |
| ARHGAP9     | -2.79121  | -2.87684  | 1.55165   | 1.57771   | -4.65668   | -3.12051  |
| ARHGDIA     | 5.33879   | 5.03346   | 4.37005   | 4.41762   | 6.06436    | 5.96698   |
| ARHGDIB     | -1.27248  | -0.604659 | 2.75017   | 3.37297   | -3.85089   | -2.53597  |
| ARHGEF1     | 4.10988   | 3.93909   | 3.94189   | 4.11396   | 4.5171     | 4.66069   |
| ARHGEF10    | 4.25293   | 3.93589   | 4.53243   | 4.54132   | 3.97177    | 3.17899   |
| ARHGEF10L   | -5.69162  | -4.87366  | 2.58798   | 2.69854   | 3.23299    | 3.73      |
| ARHGEF11    | 6.86131   | 6.68864   | 4.72335   | 4.7569    | 4.77328    | 4.60389   |
| ARHGEF12    | 7.09118   | 7.1971    | 7.36151   | 7.67021   | 7.19227    | 7.29644   |
| ARHGEF17    | 4.1735    | 3.70828   | 5.22309   | 5.02338   | 3.47401    | 2.92992   |
| ARHGEF18    | 3.54657   | 3.44765   | 3.33272   | 3.72218   | 3.95503    | 4.11455   |
| ARHGEF19    | 1.78476   | 1.33161   | 1.30034   | 1.79207   | -1.65987   | -1.38442  |
| ARHGEF2     | 5.31003   | 5.1122    | 5.28407   | 5.66964   | 4.88706    | 4.74655   |
| ARHGEF25    | 1.70991   | 1.22667   | 2.6549    | 2.53896   | 1.02984    | 1.08187   |
| ARHGEF26    | 3.75719   | 3.59903   | 2.46035   | 2.02394   | 2.96523    | 2.61071   |
| ARHGEF28    | 4.83764   | 5.49317   | 5.13049   | 5.69044   | 3.71255    | 4.07629   |
| ARHGEF3     | 1.33988   | 1.00482   | 1.69303   | 2.03075   | 4.0676     | 4.42385   |
| ARHGEF37    | 0.133932  | 0.122235  | -0.973801 | -1.10853  | 1.98717    | 1.0747    |
| ARHGEF39    | 2.91893   | 2.63315   | 2.1561    | 2.28811   | 4.10267    | 3.54714   |

|            |           |           |           |          |           |             |
|------------|-----------|-----------|-----------|----------|-----------|-------------|
| ARHGEF4    | 2.11472   | 2.3413    | 0.460428  | 0.317536 | 6.15446   | 5.89504     |
| ARHGEF40   | 5.06704   | 5.21083   | 3.52816   | 3.65669  | 2.60577   | 3.29666     |
| ARHGEF6    | 0.915697  | 0.980157  | 1.7995    | 2.35471  | 3.27338   | 3.25908     |
| ARHGEF7    | 4.29527   | 4.21135   | 4.3498    | 4.33618  | 4.55764   | 4.06477     |
| ARHGEF9    | 4.06579   | 3.88144   | 3.4531    | 3.38303  | 1.5829    | 1.83247     |
| ARID1A     | 5.4497    | 5.17694   | 5.19314   | 4.96398  | 5.33755   | 4.96835     |
| ARID1B     | 4.69951   | 4.49474   | 4.86747   | 4.77362  | 5.21192   | 4.86975     |
| ARID2      | 5.87005   | 5.77014   | 5.35757   | 5.29098  | 5.18987   | 4.77305     |
| ARID3A     | 2.46332   | 2.19539   | 2.44948   | 2.43808  | 2.31984   | 0.951558    |
| ARID3B     | 1.38375   | 1.49047   | 1.37636   | 1.21092  | 1.87744   | 0.983583    |
| ARID4A     | 4.15501   | 4.1032    | 3.63027   | 3.78295  | 3.53568   | 3.47071     |
| ARID4B     | 5.48689   | 5.56101   | 5.76812   | 5.94734  | 5.63372   | 5.71098     |
| ARID5A     | 1.8517    | 1.61401   | 1.19156   | 1.42259  | 1.79504   | 1.76905     |
| ARID5B     | 4.57412   | 4.22976   | 6.25008   | 6.38152  | 6.16561   | 6.04189     |
| ARIH1      | 5.55882   | 5.52856   | 5.95506   | 6.10624  | 5.87405   | 5.78695     |
| ARIH2      | 6.24348   | 6.20589   | 5.24984   | 5.42118  | 6.42964   | 6.40171     |
| ARIH2P1    | 1.05002   | 1.38023   | 0.0468263 | 0.621871 | 1.58604   | 1.60621     |
| ARL1       | 4.88916   | 5.05234   | 4.48003   | 5.00685  | 4.6129    | 5.29117     |
| ARL10      | 3.75933   | 4.2219    | 2.43488   | 2.67582  | -1.37455  | -2.24661    |
| ARL13B     | 3.13223   | 3.15003   | 3.25942   | 3.47425  | 2.42981   | 2.74862     |
| ARL14EP    | 3.83449   | 3.80536   | 3.53072   | 3.58166  | 3.83603   | 4.29328     |
| ARL15      | 2.39369   | 2.63519   | 2.37873   | 2.26623  | 1.41119   | 1.86317     |
| ARL16      | 3.45225   | 3.55873   | 3.39317   | 3.74379  | 4.37481   | 4.66178     |
| ARL17A     | 4.71663   | 4.62445   | 4.77658   | 4.68226  | 3.42755   | 2.71782     |
| ARL17B     | 0.590454  | 0.65976   | 1.67794   | 1.55435  | 0.0870826 | -0.662243   |
| ARL2       | 4.85832   | 4.49713   | 3.40309   | 3.54233  | 2.92169   | 3.37893     |
| ARL2-SNX15 | 2.08967   | 2.2801    | 1.77045   | 1.6519   | 1.49819   | 1.83852     |
| ARL2BP     | 3.83192   | 3.93806   | 4.04682   | 4.7012   | 5.4433    | 5.81241     |
| ARL3       | 2.68247   | 2.67159   | 2.79948   | 3.04346  | 3.15827   | 3.70055     |
| ARL4A      | 3.42801   | 3.64339   | 3.24226   | 4.06072  | 5.45924   | 6.10234     |
| ARL4C      | 4.96538   | 5.05232   | 3.25111   | 3.84828  | 7.35708   | 7.23486     |
| ARL4D      | 1.32887   | 0.929533  | 3.35564   | 3.78599  | 0.197777  | -0.280287   |
| ARL5A      | 5.84866   | 5.87911   | 4.88651   | 5.12051  | 5.97508   | 5.92433     |
| ARL5B      | 5.26669   | 5.4052    | 4.29119   | 4.56359  | 5.35718   | 5.36809     |
| ARL6       | 2.49569   | 2.79926   | 3.00096   | 3.17195  | 2.54916   | 2.6899      |
| ARL6IP1    | 7.00966   | 6.27675   | 7.24238   | 6.89856  | 6.80359   | 6.79884     |
| ARL6IP1P2  | 0.564583  | -0.484487 | 0.274614  | 0.304359 | 0.220578  | -0.00767967 |
| ARL6IP4    | 4.97297   | 4.90469   | 4.5806    | 4.82533  | 4.81522   | 5.06617     |
| ARL6IP5    | 5.71823   | 5.99991   | 5.40705   | 5.85623  | 5.89979   | 6.37309     |
| ARL6IP6    | 3.76137   | 3.68436   | 3.52038   | 3.65272  | 3.69284   | 3.53169     |
| ARL8A      | 2.77008   | 2.60231   | 2.58587   | 2.95653  | 3.26668   | 3.08432     |
| ARL8B      | 5.05529   | 5.10792   | 4.44303   | 4.99248  | 5.27294   | 5.59876     |
| ARMC1      | 4.36901   | 4.62793   | 4.44398   | 5.0939   | 4.46961   | 4.86218     |
| ARMC10     | 3.86099   | 4.05402   | 3.38884   | 3.68711  | 4.32042   | 4.81169     |
| ARMC10P1   | 1.67717   | 1.971     | 0.99324   | 1.49903  | 2.154     | 3.06559     |
| ARMC2      | -0.376978 | -0.195907 | 0.488988  | 0.100749 | 0.448309  | -0.151977   |
| ARMC4      | ?         | ?         | -4.18092  | -2.64851 | 1.08794   | 1.37014     |
| ARMC5      | 0.121267  | 0.0358491 | 0.123295  | 0.740479 | 0.490652  | 0.793954    |
| ARMC6      | 3.73851   | 3.59489   | 2.60112   | 3.0717   | 4.55014   | 4.96835     |
| ARMC7      | 1.73974   | 1.84552   | 2.09727   | 2.22658  | 3.01389   | 3.0178      |
| ARMC8      | 4.40223   | 4.44404   | 4.10879   | 4.02688  | 4.47346   | 4.73829     |
| ARMC9      | 3.61833   | 3.47967   | 4.9026    | 5.26838  | 3.08789   | 3.10386     |

|             |           |            |           |            |            |            |
|-------------|-----------|------------|-----------|------------|------------|------------|
| ARMCX1      | 3.25948   | 2.92086    | 0.597917  | 1.02051    | 2.2008     | 2.2475     |
| ARMCX2      | 1.88591   | 2.10703    | 1.70525   | 2.49481    | -2.07475   | -0.662104  |
| ARMCX3      | 4.55652   | 4.51443    | 4.26562   | 4.55205    | 4.81036    | 4.88201    |
| ARMCX4      | 3.24636   | 3.19893 ?  |           | -6.09892   | 2.29681    | 1.9868     |
| ARMCX5      | 3.42543   | 3.50289    | 3.45406   | 3.36076    | 3.50416    | 3.63431    |
| ARMCX6      | 3.06305   | 2.9431     | 2.89211   | 3.22102    | 3.4035     | 3.66672    |
| ARMCX7P     | -0.576682 | 0.403017   | -0.024631 | 0.717482   | 0.584828   | 0.217975   |
| ARMT1       | 3.48704   | 3.60056    | 3.44402   | 3.91631    | 4.41314    | 5.07793    |
| ARNT        | 4.43212   | 4.42969    | 4.12025   | 4.39896    | 4.54487    | 4.39788    |
| ARNT2       | 4.35421   | 4.66238    | 3.9894    | 4.5074     | -2.41163   | -2.38405   |
| ARNTL       | 3.10344   | 3.00273    | 3.30231   | 3.41082    | 3.21621    | 3.11347    |
| ARNTL2      | 3.89056   | 4.40906    | 4.15744   | 4.86773    | 4.29679    | 4.90338    |
| ARPC1A      | 5.91915   | 5.7658     | 5.4835    | 5.85931    | 6.12275    | 6.11423    |
| ARPC1B      | 5.37287   | 5.36945    | 4.40158   | 5.02902    | 4.58715    | 5.40179    |
| ARPC2       | 5.90798   | 5.89331    | 6.11882   | 6.52098    | 6.83738    | 7.11167    |
| ARPC3       | 5.58595   | 5.64188    | 4.77321   | 5.3202     | 5.64725    | 6.55245    |
| ARPC3P1     | 1.06794   | 1.23106    | 0.829452  | 1.16238    | 0.977302   | 2.07708    |
| ARPC3P5     | 0.523241  | 0.806374   | 0.133616  | 0.406112   | 0.876338   | 1.44848    |
| ARPC4       | 5.44691   | 5.47498    | 4.82099   | 5.27985    | 6.20858    | 6.63848    |
| ARPC4-TTLL3 | 1.11464   | 0.633059   | 0.532706  | 1.04661    | 2.27928    | 2.52278    |
| ARPC5       | 6.02903   | 6.29952    | 5.45537   | 5.99676    | 6.33441    | 6.95509    |
| ARPC5L      | 3.94116   | 3.92193    | 3.21949   | 3.46481    | 4.10207    | 4.16672    |
| ARPIN       | 4.23947   | 4.22048    | 4.58291   | 4.82773    | 0.619347   | 0.522809   |
| ARPP19      | 6.87686   | 6.93917    | 6.09878   | 6.52996    | 7.40064    | 7.57014    |
| ARRB1       | 1.33439   | 1.24456    | 4.93021   | 4.75612    | -3.6585    | -5.69922   |
| ARRB2       | 3.26526   | 3.07826    | 1.90396   | 2.06112    | 3.76385    | 3.84018    |
| ARRDC1      | 2.32607   | 2.07245    | 1.74725   | 1.98923    | 2.24359    | 1.94436    |
| ARRDC1-AS1  | 2.11792   | 1.96344    | 2.40895   | 2.68885    | 2.3841     | 2.5925     |
| ARRDC2      | 2.01175   | 2.08792    | 2.37491   | 2.8337     | 2.34252    | 2.22543    |
| ARRDC3      | 4.52362   | 4.19298    | 5.97161   | 5.95258    | 6.36235    | 5.6275     |
| ARRDC3-AS1  | 0.335998  | -0.0589688 | 1.56441   | 1.37378    | 0.716253   | -0.0314152 |
| ARRDC4      | 1.30097   | 0.645757   | 3.87852   | 2.94103    | -1.85245   | -5.69922   |
| ARSA        | 1.93757   | 1.41371    | 2.86633   | 3.0153     | 0.384182   | 0.293394   |
| ARSB        | 4.12349   | 4.32261    | 4.19152   | 4.71135    | 4.37997    | 4.83921    |
| ARSD        | 1.40425   | 1.41371    | 3.39579   | 3.94374    | 2.85538    | 3.27913    |
| ARSE        | 1.95915   | 2.15188    | 1.13846   | 1.51326    | 0.723471   | 0.80115    |
| ARSG        | 0.937359  | 1.19649    | 1.43758   | 1.93823    | -0.704754  | -0.192683  |
| ARSJ        | 4.31284   | 4.11175    | 4.16298   | 4.64187    | 6.25293    | 6.39228    |
| ARSK        | 2.82645   | 2.90567    | 3.25942   | 3.33412    | 3.00147    | 2.87072    |
| ARV1        | 3.44431   | 3.38735    | 2.87987   | 3.34445    | 4.25332    | 4.66722    |
| ARVCF       | 0.520176  | 0.503023   | 0.770744  | 0.383121   | -0.905167  | -0.899103  |
| ASAH1       | 4.56477   | 4.37794    | 4.55878   | 4.88055    | 4.91666    | 5.18886    |
| ASAH2       | 0.454123  | 0.723611   | 0.269787  | -0.0962012 | 0.886659   | 1.20515    |
| ASAH2B      | 1.55205   | 1.75319    | 0.939407  | 1.24387    | 2.94989    | 2.97484    |
| ASAP1       | 5.27391   | 5.32668    | 6.16574   | 6.267      | 6.30797    | 6.26553    |
| ASAP2       | 5.45528   | 5.66817    | 4.63038   | 4.74353    | 4.71977    | 4.6021     |
| ASAP3       | 2.46332   | 2.00479    | 3.38444   | 3.55652    | 3.58643    | 3.4607     |
| ASB1        | 5.15617   | 4.97073    | 4.39296   | 4.41375    | 6.47508    | 5.78863    |
| ASB13       | 3.40552   | 3.49571    | 2.08328   | 2.30904    | 3.06591    | 3.65084    |
| ASB14       | 1.02318   | 1.17661    | 0.805235  | 0.751361   | 1.84242    | 1.08851    |
| ASB16-AS1   | 0.0387873 | 0.055973   | 1.66002   | 1.95989    | 1.75171    | 1.04823    |
| ASB18       | 0.640852  | 0.756391   | 0.711372  | -0.108685  | -4.65668 ? |            |

|           |   |           |           |           |            |            |            |
|-----------|---|-----------|-----------|-----------|------------|------------|------------|
| ASB3      |   | 3.91521   | 3.80367   | 3.73432   | 3.94171    | 4.0063     | 4.17181    |
| ASB5      | ? |           | -5.45651  | 3.09725   | 4.18118    | -5.65305 ? |            |
| ASB6      |   | 3.93598   | 3.96498   | 3.2385    | 3.71389    | 3.92416    | 4.19915    |
| ASB7      |   | 3.87919   | 3.88589   | 3.53587   | 3.83807    | 3.83939    | 3.59249    |
| ASB8      |   | 3.54646   | 3.54277   | 3.36723   | 3.5476     | 3.55886    | 3.72373    |
| ASB9      |   | 2.84589   | 2.82025   | 2.54441   | 2.86846    | 1.05399    | 1.53173    |
| ASCC1     |   | 3.32249   | 2.88675   | 3.03384   | 2.90008    | 4.03032    | 3.84649    |
| ASCC2     |   | 3.70819   | 3.42285   | 4.02471   | 4.27595    | 4.43045    | 4.11665    |
| ASCC3     |   | 6.09857   | 6.25074   | 5.25422   | 5.63432    | 6.43836    | 6.83316    |
| ASF1A     |   | 3.647     | 3.80596   | 3.67257   | 3.93596    | 5.05839    | 5.54911    |
| ASF1B     |   | 4.43148   | 4.39901   | 4.11224   | 4.5296     | 4.4278     | 4.54831    |
| ASH1L     |   | 6.93023   | 6.82919   | 6.61061   | 6.54088    | 6.75328    | 6.51872    |
| ASH1L-AS1 |   | 1.01603   | 1.05951   | 0.638343  | 0.810682   | 0.00751128 | 0.171053   |
| ASH2L     |   | 3.89425   | 3.8484    | 3.37872   | 3.72846    | 3.24254    | 3.51969    |
| ASIC1     |   | 2.54648   | 2.33158   | 1.80519   | 1.0511     | 0.688494   | -0.0918619 |
| ASL       |   | 2.51011   | 2.41638   | 2.9614    | 3.60958    | 3.39427    | 3.93098    |
| ASMTL     |   | -0.144345 | -0.531913 | 2.78014   | 3.14359    | 0.293994   | 0.668401   |
| ASNA1     |   | 4.61323   | 4.49932   | 3.94705   | 4.42255    | 5.25332    | 5.93803    |
| ASNS      |   | 4.41205   | 5.08067   | 3.45853   | 4.28348    | 4.71582    | 4.85743    |
| ASNSD1    |   | 4.76135   | 4.7008    | 3.69758   | 3.92183    | 5.29355    | 5.98849    |
| ASPH      |   | 7.56291   | 7.25502   | 9.58566   | 9.73782    | 8.57429    | 8.07856    |
| ASPHD1    |   | 2.63763   | 1.99135   | 1.1323    | 1.28536    | -2.12536   | -2.6451    |
| ASPHD2    |   | 2.53804   | 2.74418   | 1.25378   | 1.68562    | 0.665284   | 0.878827   |
| ASPM      |   | 8.01027   | 7.91122   | 7.53989   | 7.71829    | 7.39223    | 7.439      |
| ASPN      |   | 0.255223  | 0.592522  | 0.882635  | 0.248826   | -1.26766   | -1.61882   |
| ASPSCR1   |   | 2.72089   | 2.45305   | 1.0357    | 1.36695    | 3.04013    | 3.41741    |
| ASRGL1    |   | 1.78475   | 1.67633   | 0.0833019 | -0.0450533 | 0.197777   | -0.157747  |
| ASS1      | ? | ?         |           | 0.94542   | 2.24667    | -1.26766   | -0.899103  |
| ASTE1     |   | 1.5788    | 1.63409   | 2.38451   | 2.15263    | 2.32295    | 2.4673     |
| ASTN2     |   | 1.46083   | 1.35098   | 1.73537   | 1.53507    | 1.11453    | 0.80115    |
| ASUN      |   | 4.44938   | 4.6153    | 3.87311   | 4.34854    | 4.46638    | 4.62755    |
| ASXL1     |   | 7.0464    | 6.91792   | 6.76304   | 6.77191    | 6.76216    | 6.24017    |
| ASXL2     |   | 5.87974   | 5.91601   | 4.97319   | 5.08838    | 5.85563    | 5.74963    |
| ATAD1     |   | 5.14039   | 5.39659   | 4.33217   | 4.70644    | 5.12017    | 5.69844    |
| ATAD2     |   | 6.07402   | 6.2796    | 6.1193    | 6.53383    | 6.07079    | 6.39026    |
| ATAD2B    |   | 4.63128   | 4.59985   | 4.17732   | 4.15326    | 4.46315    | 4.3472     |
| ATAD3A    |   | 3.91943   | 3.84404   | 3.57162   | 3.82297    | 4.24308    | 4.27677    |
| ATAD3B    |   | 4.50962   | 4.26012   | 4.04872   | 4.3539     | 4.15147    | 3.86248    |
| ATAD5     |   | 5.12563   | 5.02504   | 5.39538   | 5.32928    | 4.91482    | 4.7781     |
| ATAT1     |   | 1.61837   | 1.46201   | 1.48185   | 1.56364    | 2.79503    | 2.65962    |
| ATE1      |   | 4.21815   | 4.42806   | 3.73009   | 4.18063    | 4.79244    | 5.24452    |
| ATF1      |   | 3.54171   | 3.39358   | 3.07858   | 3.08839    | 3.43377    | 3.16057    |
| ATF2      |   | 5.26956   | 5.36011   | 5.81679   | 5.91619    | 5.22575    | 5.2445     |
| ATF3      |   | 2.16822   | 2.17017   | 0.711372  | 1.59165    | 2.3977     | 2.60618    |
| ATF4      |   | 6.65958   | 6.62449   | 6.30855   | 6.92197    | 6.53256    | 6.84778    |
| ATF4P3    |   | 0.0947766 | 0.382213  | 0.219847  | 0.377857   | 0.369494   | 0.16203    |
| ATF4P4    |   | 0.830466  | 1.17342   | 0.296992  | 1.19766    | 0.850295   | 0.967014   |
| ATF5      |   | 2.30719   | 2.02413   | 1.75442   | 1.76904    | 1.93174    | 1.7002     |
| ATF6      |   | 6.4949    | 6.61912   | 5.61373   | 6.08715    | 6.13795    | 6.53377    |
| ATF6B     |   | 4.14169   | 4.09653   | 4.12823   | 4.28562    | 3.96813    | 3.79114    |
| ATF7      |   | 3.39395   | 3.19091   | 3.29692   | 3.19228    | 3.16734    | 3.17346    |
| ATF7IP    |   | 5.49413   | 5.39861   | 6.09083   | 6.00783    | 5.62623    | 5.17056    |

|            |            |           |           |           |            |             |
|------------|------------|-----------|-----------|-----------|------------|-------------|
| ATG10      | 1.59181    | 1.82484   | 2.57163   | 2.89941   | 2.26958    | 2.63106     |
| ATG101     | 5.08022    | 5.26169   | 3.56675   | 4.19265   | 3.9185     | 4.64843     |
| ATG12      | 4.78406    | 4.80908   | 5.43527   | 5.72009   | 5.4367     | 5.56696     |
| ATG13      | 4.49977    | 4.49121   | 4.00854   | 4.5159    | 5.11965    | 5.14476     |
| ATG14      | 4.05162    | 4.11834   | 3.23644   | 3.19952   | 3.39362    | 3.55772     |
| ATG16L1    | 4.99918    | 5.10463   | 4.72036   | 5.22711   | 5.2166     | 5.17669     |
| ATG16L2    | 2.97347    | 2.91992   | 3.32403   | 3.63856   | 1.25182    | 1.05981     |
| ATG2A      | 3.36969    | 3.025     | 3.21949   | 3.2575    | 2.65258    | 2.78515     |
| ATG2B      | 5.70328    | 5.68937   | 4.65882   | 4.80031   | 5.24016    | 5.34991     |
| ATG3       | 3.98654    | 4.12305   | 4.20233   | 4.72327   | 4.15267    | 4.44936     |
| ATG4A      | 2.3316     | 2.34774   | 2.32824   | 2.58467   | 3.16942    | 3.5833      |
| ATG4B      | 3.66833    | 3.51586   | 3.88256   | 4.12599   | 3.77744    | 3.84787     |
| ATG4C      | 3.00482    | 2.9529    | 2.62384   | 2.7677    | 2.92466    | 3.38869     |
| ATG4D      | 1.55114    | 1.311     | 1.43259   | 1.69803   | 3.02768    | 3.03488     |
| ATG5       | 3.93028    | 3.90457   | 4.10072   | 4.4313    | 5.36412    | 5.85743     |
| ATG7       | 4.94302    | 5.00306   | 4.19546   | 4.58216   | 4.40545    | 4.72049     |
| ATG9A      | 5.23104    | 5.10613   | 5.55979   | 5.68105   | 6.13709    | 5.60691     |
| ATHL1      | 2.41467    | 1.9295    | 3.42011   | 3.31953   | 0.976378   | 0.893261    |
| ATIC       | 4.55003    | 4.58904   | 3.65095   | 3.74448   | 4.29824    | 4.47319     |
| ATL1       | 2.39945    | 2.51475   | 1.60501   | 2.16758   | 0.877744   | 1.16937     |
| ATL2       | 5.80474    | 5.91324   | 4.89728   | 5.1702    | 5.20774    | 5.53108     |
| ATL3       | 7.12375    | 7.11025   | 6.12247   | 6.59462   | 6.49574    | 6.54681     |
| ATM        | 5.06318    | 5.1995    | 6.81247   | 6.96701   | 6.42552    | 6.89456     |
| ATMIN      | 5.77981    | 5.81872   | 5.38801   | 5.69807   | 5.52875    | 5.53641     |
| ATN1       | 3.34941    | 2.85683   | 4.09724   | 3.86702   | 3.30692    | 2.89692     |
| ATOH8      | 0.278306   | -0.604659 | 1.52387   | 1.53507   | -1.85245   | -0.536593   |
| ATOX1      | 4.1805     | 4.4236    | 3.93541   | 4.26294   | 3.96722    | 4.56357     |
| ATP10B     | 2.5441     | 2.86359   | -1.01332  | -0.899117 | -5.65305 ? |             |
| ATP10D     | 3.34534    | 3.87905   | 5.27027   | 5.5515    | 4.91769    | 5.23999     |
| ATP11A     | ?          | -6.45019  | 5.00937   | 5.04472   | 0.427241   | -0.00614162 |
| ATP11B     | 5.98609    | 5.99513   | 5.536     | 5.62007   | 6.51424    | 6.39613     |
| ATP11C     | 5.1786     | 5.18055   | 5.09201   | 5.15619   | 6.46249    | 6.74267     |
| ATP13A1    | 4.61323    | 4.51943   | 4.07504   | 4.06983   | 4.97176    | 4.89133     |
| ATP13A2    | 3.62182    | 3.37131   | 3.31154   | 3.25216   | 4.11091    | 4.25111     |
| ATP13A3    | 7.25989    | 7.31849   | 6.90837   | 7.15496   | 7.48469    | 7.56631     |
| ATP1A1     | 9.06113    | 8.92325   | 8.0809    | 8.45164   | 10.2405    | 10.1439     |
| ATP1A1-AS1 | 3.19306    | 3.17016   | 2.45028   | 2.62839   | 4.29453    | 3.96503     |
| ATP1B1     | 5.40519    | 5.63345   | 7.6225    | 7.73595   | 6.28105    | 6.42079     |
| ATP1B1P1   | 0.00148521 | 0.166625  | 1.41643   | 1.22214   | 0.448309   | 0.247587    |
| ATP1B3     | 6.30451    | 6.127     | 6.49771   | 6.80693   | 6.06177    | 6.15167     |
| ATP1B3P1   | 1.72526    | 1.81366   | 2.19631   | 2.42505   | 1.48217    | 1.34728     |
| ATP2A2     | 7.88271    | 7.84699   | 7.62158   | 7.60271   | 6.88152    | 6.73414     |
| ATP2B1     | 6.33292    | 6.27672   | 5.37296   | 5.69568   | 6.62361    | 6.44111     |
| ATP2B4     | 6.07956    | 6.53418   | 6.06708   | 6.64836   | 6.03096    | 6.75609     |
| ATP2C1     | 5.71311    | 5.89393   | 5.9163    | 6.13646   | 5.98622    | 5.93811     |
| ATP5A1     | 7.82649    | 7.73212   | 7.24136   | 7.65936   | 7.11511    | 7.45044     |
| ATP5A1P1   | 1.66602    | 1.58678   | -3.13615  | -2.87089  | -0.299285  | -0.434574   |
| ATP5A1P3   | 1.85582    | 1.96934   | 1.34276   | 1.82962   | 1.4339     | 1.14942     |
| ATP5B      | 6.81587    | 6.75332   | 7.49189   | 8.06326   | 8.07295    | 8.42149     |
| ATP5C1     | 5.30687    | 5.36496   | 4.87258   | 5.35418   | 5.63642    | 6.83731     |
| ATP5C1P1   | 0.676656   | 0.724903  | -0.330777 | 0.724187  | 1.11215    | 1.56832     |
| ATP5D      | 2.23757    | 1.84096   | 1.496     | 1.61231   | 2.35331    | 2.89692     |

|                |           |           |            |           |           |           |
|----------------|-----------|-----------|------------|-----------|-----------|-----------|
| ATP5E          | 6.3265    | 6.31638   | 5.31771    | 5.75094   | 6.72668   | 7.86011   |
| ATP5EP2        | 3.87175   | 3.92094   | 2.80197    | 3.36029   | 4.52447   | 5.35773   |
| ATP5F1         | 5.83744   | 5.7776    | 5.59999    | 6.08329   | 6.31346   | 6.91707   |
| ATP5F1P6       | -0.144345 | -0.233871 | -0.568612  | 0.220441  | 0.246688  | 0.443129  |
| ATP5F1P7       | 0.558395  | 0.251507  | 0.120378   | 0.781183  | 0.815493  | 1.37295   |
| ATP5G1         | 4.93519   | 4.86599   | 4.10982    | 4.74127   | 4.28578   | 5.00494   |
| ATP5G2         | 5.91959   | 5.84275   | 5.25256    | 5.5993    | 5.51263   | 6.01856   |
| ATP5G2P4       | 0.477532  | 0.771767  | -0.0319874 | 0.158505  | 0.21579   | 0.362823  |
| ATP5G3         | 5.88254   | 5.8925    | 6.44169    | 6.90133   | 6.25128   | 6.87964   |
| ATP5H          | 4.35918   | 4.4056    | 5.06068    | 5.4932    | 5.87039   | 6.7375    |
| ATP5HP4        | 1.75053   | 1.96122   | 2.31331    | 2.35176   | 2.82278   | 3.39931   |
| ATP5I          | 4.17318   | 4.10873   | 3.58374    | 4.04994   | 5.17025   | 5.91472   |
| ATP5J          | 4.27786   | 4.21318   | 4.23873    | 4.54926   | 4.50927   | 5.22937   |
| ATP5J2         | 5.50381   | 5.56298   | 5.22613    | 5.64495   | 5.73976   | 6.25696   |
| ATP5J2-PTCD1   | 2.39996   | 2.10546   | 2.20117    | 2.18891   | 1.71603   | 1.78129   |
| ATP5L          | 4.96983   | 4.93567   | 5.1506     | 5.54174   | 5.34095   | 6.06451   |
| ATP5LP2        | 0.0938171 | 0.318716  | 0.74491    | 0.917875  | 0.847516  | 1.12457   |
| ATP5O          | 5.00128   | 4.93803   | 5.81399    | 6.23325   | 5.47859   | 6.30831   |
| ATP5S          | 3.63293   | 3.56643   | 2.65324    | 2.70501   | 3.5773    | 3.74029   |
| ATP5SL         | 3.72928   | 3.50581   | 3.34004    | 3.65605   | 4.1341    | 4.22844   |
| ATP6AP1        | 5.44523   | 5.29286   | 5.08558    | 5.19437   | 6.19686   | 6.07053   |
| ATP6AP1L       | -0.509064 | -0.333394 | 1.37111    | 0.879925  | 0.529601  | -0.247125 |
| ATP6AP2        | 4.98285   | 4.94386   | 6.00653    | 6.30803   | 5.28693   | 5.43975   |
| ATP6V0A1       | 4.78678   | 4.74904   | 4.97445    | 5.10733   | 4.83753   | 4.51728   |
| ATP6V0A2       | 4.77746   | 4.71527   | 3.73384    | 4.09216   | 4.43984   | 4.2527    |
| ATP6V0B        | 5.73865   | 5.84093   | 5.20826    | 6.03583   | 5.71176   | 6.67319   |
| ATP6V0C        | 3.31106   | 3.07524   | 2.9618     | 3.06189   | 3.1943    | 3.0236    |
| ATP6V0D1       | 4.56418   | 4.35413   | 4.90525    | 5.16845   | 5.89954   | 5.76444   |
| ATP6V0E1       | 5.16897   | 4.95449   | 5.79944    | 6.21363   | 6.67491   | 7.12126   |
| ATP6V0E2       | 3.97915   | 4.08056   | 3.48772    | 4.03247   | 4.97488   | 5.06475   |
| ATP6V0E2-AS1   | 1.06527   | 0.800364  | 1.58249    | 1.50312   | 0.26052   | 0.401903  |
| ATP6V1A        | 5.81539   | 5.81966   | 6.69218    | 7.14413   | 6.31033   | 6.22367   |
| ATP6V1B2       | 5.84001   | 5.74267   | 4.89261    | 5.27972   | 5.64574   | 5.79014   |
| ATP6V1C1       | 5.30091   | 5.21001   | 5.2651     | 5.75613   | 5.90119   | 6.22586   |
| ATP6V1C2       | 3.54029   | 3.51586   | 2.81241    | 2.78491   | 3.10812   | 2.8156    |
| ATP6V1D        | 4.38424   | 4.26355   | 3.42433    | 3.86343   | 4.60516   | 5.29719   |
| ATP6V1E1       | 5.56494   | 5.46579   | 4.81486    | 5.37817   | 5.26464   | 5.92268   |
| ATP6V1E1P1     | 2.04111   | 2.00249   | 1.43014    | 1.97422   | 1.73782   | 2.08652   |
| ATP6V1E2       | 2.06547   | 2.10988   | 1.48894    | 1.28354   | 1.17845   | 1.28202   |
| ATP6V1F        | 4.28462   | 4.07726   | 3.57467    | 3.98521   | 4.54975   | 5.14113   |
| ATP6V1G1       | 4.57588   | 4.75086   | 3.75164    | 4.35674   | 5.09874   | 5.67374   |
| ATP6V1G2-DDX39 | 3.25627   | 3.0536    | 2.39245    | 2.7812    | 2.21195   | 2.85766   |
| ATP6V1H        | 4.08718   | 4.12587   | 4.1111     | 4.51505   | 3.79604   | 4.08445   |
| ATP7A          | 3.85835   | 4.00163   | 5.48269    | 5.88298   | 4.90576   | 5.12215   |
| ATP7B          | 2.51768   | 2.29206   | 2.02595    | 1.72409   | -0.217212 | -1.53638  |
| ATP8A1         | 0.0692347 | 0.278722  | 2.50997    | 2.68885   | -2.95876  | -2.70579  |
| ATP8A2         | 1.60016   | 2.08792   | -0.825729  | -0.786664 | -3.33694  | -2.24661  |
| ATP8B1         | 1.55412   | 1.59663   | 2.99968    | 3.18227   | 1.51115   | 1.53373   |
| ATP8B2         | 5.72561   | 5.33278   | 4.90128    | 5.10427   | 5.08282   | 4.54002   |
| ATP8B3         | 0.334442  | 0.305445  | 2.02595    | 2.02562   | 0.0263185 | 0.0483059 |
| ATP9A          | 6.74074   | 6.75433   | 5.54736    | 5.69368   | 5.20696   | 4.87448   |
| ATP9B          | 3.82349   | 3.70833   | 3.28       | 3.13673   | 2.10458   | 1.65964   |

|          |           |            |            |           |            |            |
|----------|-----------|------------|------------|-----------|------------|------------|
| ATPAF1   | 3.97863   | 3.91327    | 4.64301    | 4.99118   | 4.80423    | 5.22402    |
| ATPAF2   | 2.24175   | 2.08781    | 2.38735    | 2.29731   | 2.80268    | 2.84476    |
| ATPIF1   | 4.14248   | 4.07922    | 3.9406     | 4.21647   | 4.5473     | 4.66941    |
| ATR      | 5.16014   | 5.30574    | 6.06341    | 6.35415   | 5.44436    | 5.85274    |
| ATRAID   | 5.40774   | 5.20431    | 4.23044    | 4.60117   | 4.25179    | 5.25111    |
| ATRIP    | 3.25415   | 3.27719    | 2.33449    | 2.85991   | 2.92813    | 3.02946    |
| ATRN     | 6.25529   | 6.3132     | 6.15934    | 6.42397   | 5.49889    | 5.42834    |
| ATRNL1   | 3.24636   | 3.22541    | -3.85951   | -3.10759  | -4.07293   | -3.12051   |
| ATRX     | 6.94158   | 6.89277    | 7.41639    | 7.34663   | 7.37541    | 7.20597    |
| ATXN1    | 5.09411   | 5.18009    | 5.8785     | 5.68436   | 5.71092    | 5.69629    |
| ATXN10   | 5.36193   | 5.26954    | 5.21849    | 5.43645   | 4.6938     | 5.38654    |
| ATXN1L   | 4.86981   | 4.94934    | 5.24827    | 5.66834   | 5.90995    | 5.82795    |
| ATXN2    | 4.92753   | 4.82139    | 4.8016     | 4.70815   | 4.49006    | 4.07628    |
| ATXN2L   | 4.4307    | 4.19293    | 4.74147    | 4.73119   | 4.25767    | 4.30578    |
| ATXN3    | 3.92869   | 4.02616    | 2.9792     | 3.00494   | 3.80049    | 3.96171    |
| ATXN7    | 4.78724   | 4.74904    | 4.8256     | 4.88056   | 4.48625    | 3.84595    |
| ATXN7L1  | 2.15269   | 2.26849    | 2.42751    | 2.26188   | 2.1145     | 1.85556    |
| ATXN7L2  | 1.78073   | 1.81795    | 1.33222    | 1.37503   | 1.82756    | 1.91536    |
| ATXN7L3  | 4.48642   | 4.38419    | 4.36143    | 4.65022   | 5.23906    | 5.33425    |
| ATXN7L3B | 5.62447   | 5.72741    | 4.99206    | 5.30564   | 5.194      | 5.10349    |
| AUH      | 1.53458   | 1.49719    | 1.42385    | 1.71138   | 1.67511    | 1.65087    |
| AUNIP    | 3.55897   | 3.56874    | 2.05117    | 2.51325   | 3.02609    | 3.24637    |
| AUP1     | 6.22879   | 6.1837     | 5.51098    | 5.91141   | 6.10353    | 6.22117    |
| AURKA    | 6.20713   | 6.13449    | 5.45702    | 6.0423    | 6.14176    | 6.33317    |
| AURKAIP1 | 4.07982   | 4.05582    | 3.65568    | 4.02816   | 4.66387    | 5.6056     |
| AURKAPS1 | 1.89251   | 1.92102    | 1.32342    | 1.67438   | 1.54192    | 1.33942    |
| AURKB    | 4.65681   | 4.54418    | 4.02349    | 4.02174   | 4.6297     | 4.31704    |
| AUTS2    | -5.10914  | -5.45651   | 3.60438    | 3.01012   | 4.28512    | 4.14503    |
| AVEN     | 1.95558   | 2.041      | 2.02595    | 2.47239   | 2.45084    | 2.908      |
| AVL9     | 5.62617   | 5.78514    | 5.93856    | 6.20112   | 6.39385    | 6.47082    |
| AVPI1    | 3.52613   | 3.27525    | 1.65571    | 2.25313   | 0.121175   | 0.359476   |
| AXIN1    | 1.83622   | 1.62994    | 2.92239    | 3.07108   | 3.06762    | 2.9515     |
| AXIN2    | 0.852934  | 0.614908   | 2.23762    | 1.89984   | -0.808639  | -1.31405   |
| AXL      | 7.79948   | 8.03509    | 7.09698    | 7.49      | 7.46898    | 7.72795    |
| AZI2     | 4.54169   | 4.51364    | 3.94586    | 4.26483   | 4.76259    | 4.98263    |
| AZIN1    | 6.41188   | 6.37341    | 6.59701    | 6.87413   | 6.53275    | 6.64478    |
| AZIN2    | -0.191134 | -0.0876659 | 2.14293    | 2.11036   | 0.479334   | 0.736302   |
| B2M      | 8.08041   | 8.11475    | 9.35168    | 9.5134    | 9.00866    | 9.80391    |
| B3GALNT1 | 2.7726    | 3.459      | -4.59508 ? |           | 0.258664   | 1.32676    |
| B3GALNT2 | 4.16973   | 4.1792     | 3.77647    | 3.86558   | 4.22157    | 4.07792    |
| B3GALT1  | 1.69693   | 1.99454    | -6.17309   | -5.10387  | -0.11254   | 1.15132    |
| B3GALT2  | 3.63407   | 3.54418    | 2.1019     | 1.87419   | 1.50965    | 1.20023    |
| B3GALT4  | 0.345419  | 0.537236   | -0.252626  | -0.464785 | -0.0903144 | -0.151977  |
| B3GALT6  | 4.17743   | 3.84321    | 3.30231    | 3.20859   | 3.64119    | 3.24457    |
| B3GAT2   | 1.30209   | 1.33102    | 0.121572   | 0.191323  | 1.23967    | 0.970405   |
| B3GAT3   | 4.21977   | 4.08337    | 3.3358     | 3.68038   | 4.69431    | 5.08677    |
| B3GLCT   | 3.53334   | 3.80159    | 3.32625    | 3.41865   | 3.8769     | 4.36608    |
| B3GNT2   | 4.20703   | 4.17647    | 4.29423    | 4.58292   | 4.44952    | 4.36207    |
| B3GNT4   | 0.775346  | 1.41004    | 0.90829    | 0.84608   | 0.909174   | -0.0765359 |
| B3GNT5   | 4.6478    | 5.01639    | 1.84293    | 2.39073   | 4.15978    | 4.12092    |
| B3GNT7   | 5.9416    | 5.68181    | -2.27595   | -1.64896  | -3.33694   | -3.12051   |
| B3GNT9   | 1.00568   | 0.835124   | 3.47502    | 3.69596   | 4.02785    | 4.08465    |



|            |           |           |            |           |           |           |
|------------|-----------|-----------|------------|-----------|-----------|-----------|
| B3GNTL1    | 2.48697   | 2.42835   | 2.93557    | 2.98987   | 2.83837   | 2.78916   |
| B4GALNT1   | 4.11119   | 4.1481    | 5.62407    | 5.7025    | 4.2867    | 3.94124   |
| B4GALNT3   | 1.9769    | 1.93378   | -6.17309   | -6.09892  | 0.997957  | 0.151378  |
| B4GALNT4   | 3.06579   | 2.60325   | 2.39769    | 2.2086    | -0.572647 | -0.706491 |
| B4GALT1    | 4.37573   | 4.37083   | 4.58051    | 4.89258   | 6.62667   | 6.62307   |
| B4GALT2    | 4.57063   | 4.39201   | 4.35949    | 4.67335   | 4.49324   | 4.50638   |
| B4GALT3    | 5.09498   | 5.20328   | 3.68521    | 4.18022   | 4.75077   | 4.89531   |
| B4GALT4    | 3.69752   | 3.28534   | 3.50295    | 3.13186   | 2.96358   | 2.48312   |
| B4GALT5    | 5.98478   | 6.06755   | 6.42795    | 7.01899   | 5.75489   | 5.52149   |
| B4GALT6    | 5.45163   | 5.60323   | 3.95346    | 4.33307   | -2.65941  | -1.70626  |
| B4GALT7    | 2.91564   | 2.55119   | 3.63025    | 3.77991   | 3.16624   | 3.24749   |
| B4GAT1     | 4.59955   | 4.31523   | 4.16851    | 4.41277   | 3.47411   | 3.65523   |
| B9D1       | 1.43895   | 0.950117  | 1.91271    | 2.15412   | 1.6678    | 2.34331   |
| B9D2       | -0.509064 | -0.233871 | -0.095919  | -0.585061 | 0.427241  | 0.951558  |
| BABAM1     | 4.73293   | 4.80686   | 4.24483    | 4.56448   | 5.68564   | 6.13562   |
| BACE1      | 5.54113   | 5.30702   | 5.19907    | 5.12157   | 5.04328   | 4.97969   |
| BACE1-AS   | 0.323578  | 0.169194  | 0.14659    | 0.237233  | 0.0752314 | -0.414318 |
| BACE2      | 6.33035   | 6.75146   | 5.0955     | 5.17542   | 3.87884   | 4.69629   |
| BACH1      | 6.08696   | 5.95977   | 5.96969    | 6.08409   | 4.35301   | 4.40442   |
| BACH1-IT2  | 0.50068   | 0.292146  | 0.805235   | 0.46112   | -2.26731  | -1.61882  |
| BACH2      | 1.88591   | 1.86673   | -0.69145   | -0.40821  | 0.870676  | 0.171745  |
| BAD        | 2.54987   | 2.27606   | 2.43257    | 2.79269   | 2.60887   | 3.51464   |
| BAG1       | 3.18814   | 3.12212   | 2.69913    | 3.03584   | 4.54913   | 5.09499   |
| BAG2       | 4.29369   | 4.40611   | 4.72844    | 4.95797   | 6.0196    | 6.25468   |
| BAG3       | 3.71243   | 3.68817   | 4.54523    | 4.901     | 5.07776   | 5.00752   |
| BAG4       | 4.79338   | 4.92177   | 4.16883    | 4.69538   | 4.48059   | 4.51966   |
| BAG5       | 4.98653   | 5.04396   | 4.06914    | 4.34445   | 5.30979   | 5.21437   |
| BAG6       | 5.39803   | 5.31836   | 5.25825    | 5.4286    | 6.121     | 6.28558   |
| BAGE2      | 4.03053   | 3.90191   | -2.07396   | -2.28557  | -2.72209  | -2.78024  |
| BAHCC1     | 2.49815   | 2.09942   | 3.2088     | 2.96799   | -1.90489  | -2.8983   |
| BAHD1      | 3.7938    | 3.51565   | 2.79974    | 2.99312   | 3.2941    | 3.13843   |
| BAIAP2     | 2.57863   | 2.27026   | 2.693      | 2.90201   | 2.2785    | 2.34315   |
| BAIAP2-AS1 | 3.1243    | 2.68437   | 3.48182    | 3.55652   | 2.8134    | 2.10709   |
| BAIAP2L1   | 4.40812   | 4.38211   | 2.98989    | 3.1218    | 0.736804  | 0.0747657 |
| BAK1       | 3.33351   | 3.07152   | 3.04991    | 2.95364   | 3.80461   | 3.60522   |
| BAK1P1     | 0.16651   | -0.323864 | 0.121864   | -0.123527 | 0.62174   | 0.43127   |
| BAMBI      | 6.34287   | 6.36011   | 5.93633    | 5.7213    | 3.51959   | 3.61522   |
| BANF1      | 4.80555   | 4.44128   | 4.27542    | 4.16668   | 4.07559   | 3.49595   |
| BANP       | 3.18891   | 3.0604    | 2.90844    | 2.82619   | 2.3334    | 2.54094   |
| BAP1       | 5.12706   | 5.10082   | 4.81788    | 5.13434   | 5.65511   | 5.79958   |
| BARD1      | 4.20479   | 4.38811   | 5.33118    | 5.58421   | 4.62103   | 5.0015    |
| BASP1      | ?         | -5.45651  | 5.01798    | 5.48641   | -6.64581  | ?         |
| BATF3      | 0.96632   | 1.01295   | -0.0541032 | 0.736735  | 0.448309  | 1.34861   |
| BAX        | 4.33295   | 4.23412   | 3.62543    | 3.80257   | 4.36274   | 4.10385   |
| BAZ1A      | 5.67927   | 5.62902   | 4.75283    | 4.96031   | 5.82216   | 5.69877   |
| BAZ1B      | 7.25164   | 7.35051   | 7.06022    | 7.39805   | 7.31337   | 7.23455   |
| BAZ2A      | 4.96516   | 4.83684   | 6.00533    | 5.9591    | 5.49849   | 5.01777   |
| BAZ2B      | 5.12557   | 5.21725   | 4.59034    | 4.33495   | 5.81111   | 5.84753   |
| BBC3       | 0.460879  | 0.0291348 | 0.138526   | 0.632724  | 0.0540566 | 0.33778   |
| BBIP1      | 3.25263   | 3.22603   | 3.60142    | 3.70828   | 4.29175   | 4.27626   |
| BBS1       | 2.49419   | 2.40831   | 2.82742    | 2.8983    | 2.14956   | 1.69097   |
| BBS10      | 3.37104   | 3.27694   | 3.16521    | 3.17658   | 2.85933   | 2.81686   |

|               |           |          |             |            |            |           |
|---------------|-----------|----------|-------------|------------|------------|-----------|
| BBS12         | 1.75627   | 1.52587  | 1.32432     | 1.63267    | 1.46902    | 1.70271   |
| BBS2          | 3.91592   | 3.96737  | 4.23853     | 4.18734    | 4.52781    | 4.69871   |
| BBS4          | 3.30374   | 3.35094  | 3.31433     | 3.4284     | 3.52951    | 4.14971   |
| BBS5          | 1.35938   | 1.13027  | -0.406801   | 0.0430925  | 0.693516   | 1.01645   |
| BBS7          | 2.84975   | 3.21664  | 3.06678     | 3.4515     | 2.94887    | 3.4582    |
| BBS9          | 2.64966   | 2.57334  | 2.77068     | 2.85696    | 2.47669    | 3.06148   |
| BBX           | 6.13479   | 6.18012  | 6.27923     | 6.67804    | 6.46182    | 6.53436   |
| BCAM          | 0.66732   | 0.370142 | 2.61739     | 2.50589    | 1.26455    | 1.76092   |
| BCAN          | 0.0961134 | 0.791231 | -0.00291864 | 0.191727   | 0.269249   | -0.171362 |
| BCAP29        | 5.65673   | 5.60745  | 4.48285     | 4.79624    | 5.20251    | 5.48546   |
| BCAP31        | 6.2735    | 6.23738  | 6.488       | 6.76575    | 7.2765     | 7.19189   |
| BCAR1         | 3.76738   | 3.43679  | 4.62424     | 4.67644    | 3.88826    | 3.9315    |
| BCAR3         | 4.18911   | 4.17514  | 4.62989     | 5.43302    | 4.48514    | 4.57721   |
| BCAS2         | 4.21864   | 4.38769  | 3.32918     | 4.06023    | 5.83098    | 6.34878   |
| BCAS2P2       | 0.38363   | 0.671973 | 0.0931274   | -0.0710105 | 1.63472    | 2.26031   |
| BCAS3         | 3.27523   | 3.00066  | 3.06176     | 3.0483     | 3.23451    | 3.07465   |
| BCAS4         | 2.5303    | 2.6931   | 4.56379     | 4.6821     | 4.09865    | 4.69297   |
| BCAT1         | 6.33316   | 6.22997  | 7.04651     | 7.60689    | 7.96152    | 7.78949   |
| BCAT2         | 3.03224   | 2.66387  | 3.76338     | 3.75845    | 4.02356    | 4.15282   |
| BCCIP         | 4.99911   | 5.01058  | 4.70936     | 5.18924    | 5.53128    | 5.9193    |
| BCDIN3D       | 1.79365   | 1.70067  | 1.8627      | 1.97737    | 1.66897    | 2.13124   |
| BCDIN3D-AS1   | 0.602837  | 0.815985 | 0.533484    | 0.552938   | -0.0254193 | -0.671095 |
| BCHE          | 2.54885   | 2.72946  | -6.17309    | -6.09892   | 5.65623    | 6.16519   |
| BCKDHA        | 1.50511   | 0.644429 | 2.10348     | 2.74935    | 2.35694    | 2.35401   |
| BCKDHB        | 3.16975   | 3.24452  | 2.97383     | 3.0636     | 3.47026    | 3.44049   |
| BCKDK         | 3.03394   | 2.83866  | 3.17403     | 3.26839    | 3.7981     | 3.62421   |
| BCL10         | 3.35892   | 3.34612  | 3.46034     | 3.96933    | 3.98534    | 4.12776   |
| BCL2          | 3.63184   | 3.46642  | 0.976408    | 1.40691    | 1.46385    | 1.23585   |
| BCL2L1        | 4.54367   | 4.76962  | 4.46254     | 5.09429    | 4.84168    | 5.03256   |
| BCL2L11       | 3.08065   | 3.04693  | 3.33415     | 3.17889    | 3.59942    | 3.60843   |
| BCL2L12       | 2.20017   | 2.13852  | 1.73672     | 2.08552    | 2.82128    | 2.85456   |
| BCL2L13       | 5.26417   | 5.26038  | 5.5533      | 5.80891    | 5.547      | 5.60786   |
| BCL2L2        | 4.32044   | 4.3065   | 3.52263     | 3.78037    | 4.34859    | 4.08431   |
| BCL2L2-PABPN1 | 0.51922   | 0.067625 | 0.217988    | 0.362318   | 0.695477   | 1.20474   |
| BCL3          | 2.33986   | 2.26169  | 2.12483     | 2.3424     | 1.70604    | 1.72795   |
| BCL6          | 4.93363   | 4.60839  | 4.50643     | 4.63566    | 4.11317    | 3.78431   |
| BCL7B         | 3.94116   | 3.92086  | 3.60602     | 4.0994     | 4.38339    | 4.60503   |
| BCL7C         | 2.29656   | 2.46486  | 2.36877     | 2.53308    | 2.93607    | 3.64835   |
| BCL9          | 4.24343   | 4.09367  | 3.62705     | 3.35878    | 4.51959    | 4.42      |
| BCL9L         | 3.10599   | 2.61345  | 4.46864     | 4.27784    | 3.51496    | 3.53395   |
| BCLAF1        | 6.69908   | 6.71156  | 6.77272     | 6.94764    | 7.3656     | 7.20012   |
| BCLAF1P2      | 4.68915   | 4.69278  | 4.57816     | 4.81388    | 5.30212    | 5.22526   |
| BCOR          | 4.11149   | 4.14356  | 4.0063      | 4.01011    | 3.919      | 3.8421    |
| BCORL1        | 2.35621   | 1.84096  | 3.28815     | 2.94646    | 2.57092    | 2.11348   |
| BCR           | 4.22461   | 4.20797  | 4.66292     | 4.73679    | 3.53543    | 3.56853   |
| BCS1L         | 3.56457   | 3.60029  | 3.4286      | 3.74434    | 4.01791    | 4.11406   |
| BCYRN1        | 6.83861   | 6.45824  | 5.57956     | 5.33446    | 5.75986    | 5.08718   |
| BDH1          | 2.01519   | 1.92519  | 2.80233     | 3.12       | 3.49197    | 3.51969   |
| BDH2          | 2.63454   | 2.64674  | 2.65001     | 2.69047    | 1.53582    | 2.64745   |
| BDH2P1        | 1.5854    | 1.67979  | 0.984444    | 1.09578    | 0.19439    | 1.34612   |
| BDKRB2        | 3.69646   | 3.97727  | 0.860939    | 2.02567    | -4.33548   | -3.70484  |
| BDNF          | 2.19647   | 2.17984  | 4.08251     | 4.62736    | 3.7426     | 4.38193   |

|                |             |           |            |           |           |           |
|----------------|-------------|-----------|------------|-----------|-----------|-----------|
| BDNF-AS        | -0.102543   | 0.0815578 | 2.06276    | 2.14504   | 0.895101  | 1.15261   |
| BDP1           | 5.91076     | 5.98862   | 6.21865    | 6.37017   | 6.88093   | 6.86838   |
| BECN1          | 4.99076     | 4.99443   | 4.51935    | 4.88745   | 5.44713   | 5.46365   |
| BEND3          | 2.14956     | 2.18104   | 1.99641    | 1.89682   | 2.17259   | 1.76905   |
| BEND3P1        | 1.85588     | 2.24181   | -4.59508 ? |           | -1.00108  | -0.189804 |
| BEND3P3        | -0.00370816 | -0.133526 | -0.130602  | 0.0324394 | 0.706756  | 0.385641  |
| BEND6          | 2.47835     | 2.6587    | 1.66826    | 2.44961   | 0.597155  | 2.16367   |
| BEND7          | ? ?         |           | 1.20023    | 1.02051   | 0.282309  | 0.0747657 |
| BEST1          | 3.003       | 2.52565   | 3.50421    | 4.10059   | 3.75051   | 4.15317   |
| BET1           | 2.81762     | 3.124     | 4.11394    | 4.67605   | 3.1276    | 3.69203   |
| BET1L          | 3.80078     | 3.64699   | 3.94834    | 4.21421   | 3.41917   | 3.55068   |
| BEX1           | -5.69162    | -3.87578  | -5.1783    | -4.52056  | 2.51213   | 3.6813    |
| BFAR           | 5.12389     | 5.16559   | 5.1795     | 5.45007   | 5.21888   | 5.60446   |
| BFSP1          | 3.30934     | 2.9801    | 2.11571    | 2.67582   | 1.2586    | 1.56011   |
| BGN            | 2.59785     | 1.55956   | -1.09576   | -4.10635  | -4.65668  | -3.70484  |
| BHLHB9         | 1.15272     | 0.785157  | 1.77651    | 1.8512    | 3.01566   | 3.14816   |
| BHLHE40        | 3.45194     | 3.53574   | 4.3939     | 4.63263   | 6.10826   | 5.51607   |
| BHLHE41        | 2.38173     | 3.2184    | 0.782333   | 1.28354   | 3.1673    | 3.1322    |
| BICC1          | 3.94116     | 4.13985   | 4.60926    | 5.21815   | 4.83154   | 5.09336   |
| BICD1          | 5.24375     | 5.33439   | 4.89929    | 4.91353   | 6.24806   | 5.82417   |
| BICD2          | 4.75569     | 4.86244   | 4.45219    | 4.86344   | 4.44297   | 4.34584   |
| BID            | 3.85742     | 3.57744   | 4.2912     | 4.66431   | 3.69504   | 4.25618   |
| BIN1           | 3.91287     | 3.71707   | 4.60682    | 4.90029   | 3.15507   | 3.25329   |
| BIN3           | 5.52146     | 5.49047   | 3.10415    | 3.43253   | 2.61454   | 2.6183    |
| BIRC2          | 4.68192     | 4.70269   | 5.77863    | 6.22985   | 5.17691   | 5.39657   |
| BIRC3          | 5.10102     | 5.63684   | 4.7685     | 6.08159   | 2.53446   | 2.96571   |
| BIRC5          | 6.45902     | 6.34468   | 5.82316    | 6.25694   | 6.50547   | 6.66283   |
| BIRC6          | 7.96027     | 7.97734   | 7.2875     | 7.4173    | 8.09013   | 8.02631   |
| BIVM           | 3.49769     | 3.37      | 4.2357     | 4.17116   | 3.65059   | 3.36074   |
| BIVM-ERCC5     | 1.38555     | 1.59078   | 2.25358    | 2.77081   | 2.21566   | 2.68332   |
| BLACAT1        | 1.04917     | 1.60865   | -2.01303   | -2.02079  | 1.45867   | 1.15132   |
| BLCAP          | 4.15268     | 4.08212   | 4.84022    | 5.26238   | 3.98354   | 3.99719   |
| BLID           | 1.8934      | 1.39328   | 1.5714     | 1.51835   | 0.529601  | 0.832509  |
| BLM            | 5.11869     | 5.18461   | 4.59126    | 4.7288    | 3.83054   | 4.01438   |
| BLMH           | 4.81069     | 4.86302   | 4.85607    | 4.93898   | 5.37653   | 5.39394   |
| BLOC1S1        | 3.75729     | 3.92171   | 2.83934    | 3.1912    | 3.51997   | 4.09945   |
| BLOC1S2        | 3.48083     | 3.53855   | 3.15856    | 3.65273   | 4.48751   | 5.02967   |
| BLOC1S3        | 0.816493    | 0.559609  | 1.17362    | 1.75527   | 0.661695  | 0.443129  |
| BLOC1S4        | 2.78676     | 2.65351   | 1.59787    | 2.02562   | 2.54915   | 2.31567   |
| BLOC1S5        | 2.60683     | 2.55814   | 2.74402    | 3.00588   | 3.30482   | 3.64241   |
| BLOC1S5-TXNDC5 | 5.27215     | 5.26654   | 4.75465    | 4.89875   | 5.86033   | 5.67854   |
| BLOC1S6        | 5.28104     | 5.34729   | 4.50556    | 4.8812    | 5.38575   | 5.72579   |
| BLVRA          | 3.28818     | 3.18641   | 4.15633    | 4.56711   | 1.99435   | 1.99375   |
| BLVRB          | 1.88215     | 1.79457   | 5.12651    | 5.51414   | 2.76176   | 3.59707   |
| BLZF1          | 4.40158     | 4.56367   | 3.77212    | 4.23989   | 4.82046   | 5.65523   |
| BMF            | 3.06413     | 1.89913   | 3.13841    | 2.41475   | 3.04533   | 2.19417   |
| BMI1           | 4.00688     | 4.03227   | 3.56759    | 3.76244   | 4.56601   | 4.48003   |
| BMP1           | 4.09126     | 3.81444   | 3.93411    | 3.88694   | 4.58404   | 4.25039   |
| BMP2           | 2.14329     | 2.25827   | -0.757028  | -0.353769 | -5.07051  | -4.70296  |
| BMP2K          | 4.74228     | 4.86919   | 6.11639    | 6.12682   | 5.04002   | 4.98047   |
| BMP2KL         | -2.16231    | -1.59638  | 0.679262   | 0.770643  | 0.283104  | 0.432489  |
| BMP4           | 0.219896    | 0.151976  | 2.95604    | 2.44961   | -0.682812 | -0.848487 |

|           |            |            |           |           |           |           |
|-----------|------------|------------|-----------|-----------|-----------|-----------|
| BMP6      | 0.802814   | 1.18901    | -1.78917  | -2.64851  | 2.55159   | 2.67674   |
| BMP7      | ?          | -6.45019   | 2.759     | 3.02046   | -6.64581  | -5.69922  |
| BMP8B     | 5.05499    | 5.50607    | -0.310119 | -0.254069 | -0.533088 | -0.583854 |
| BMPR1A    | 4.91345    | 4.90806    | 4.71006   | 4.81441   | 5.59798   | 5.53812   |
| BMPR1APS1 | 2.07256    | 2.18833    | 1.8026    | 1.97982   | 2.74193   | 3.09237   |
| BMPR1APS2 | 2.1887     | 2.27712    | 1.89902   | 2.18989   | 2.93634   | 3.13487   |
| BMPR1B    | 1.30659    | 1.09179 ?  |           | -5.10387  | 3.93402   | 4.17592   |
| BMPR2     | 5.22717    | 5.28159    | 5.53498   | 5.54983   | 5.92378   | 5.63869   |
| BMS1      | 5.89462    | 5.90678    | 5.27755   | 5.60777   | 5.94161   | 5.77603   |
| BMS1P1    | 1.28806    | 1.21225    | 2.14794   | 1.6715    | 1.79459   | 0.926379  |
| BMS1P2    | 1.42961    | 1.30921    | 1.8753    | 1.87758   | 1.41486   | 1.21383   |
| BMS1P20   | 1.21233    | 1.17295    | 1.05185   | 1.13566   | 1.10052   | 0.170258  |
| BMS1P22   | 1.41787    | 1.68159    | 0.582614  | 0.703685  | 0.104538  | -1.4996   |
| BMS1P4    | 1.16882    | 1.38401    | 1.56308   | 1.4822    | 1.69447   | 1.34217   |
| BNC2      | 4.64244    | 4.73498    | 2.53073   | 2.50957   | 6.16721   | 6.17439   |
| BNIP1     | 1.9303     | 2.02099    | 2.05967   | 2.36692   | 2.36207   | 2.90432   |
| BNIP2     | 5.79026    | 6.06095    | 5.2359    | 5.71174   | 5.98556   | 6.37542   |
| BNIP3     | 4.21953    | 4.16694    | 5.43626   | 5.77982   | 7.38707   | 6.52259   |
| BNIP3L    | 5.27675    | 4.84889    | 6.05039   | 6.20829   | 6.92573   | 6.21373   |
| BNIP3P1   | 2.57785    | 2.56926    | 3.86353   | 4.36205   | 5.76907   | 5.34468   |
| BNIP3P4   | 2.63395    | 2.54555    | -3.18222  | -6.09892  | -1.45047  | -1.53638  |
| BOC       | -1.2962    | -1.64566   | 2.65537   | 2.66561   | 0.6914    | 0.410721  |
| BOD1      | 3.77665    | 3.83407    | 4.48269   | 4.93761   | 4.31769   | 4.78413   |
| BOD1L1    | 6.92685    | 6.93736    | 6.31207   | 6.62482   | 6.83491   | 6.43347   |
| BOK       | 2.39105    | 2.18463    | 0.674533  | 0.646135  | -2.07475  | -2.53597  |
| BOLA1     | 1.80874    | 1.89912    | 0.904002  | 0.924662  | 0.134221  | 0.578775  |
| BOLA2     | 1.00435    | 0.994565   | 0.665829  | 1.28301   | 1.76221   | 2.95979   |
| BOLA2B    | 3.27672    | 3.30148    | 2.74677   | 3.34895   | 4.28073   | 5.19476   |
| BOLA3     | 2.22871    | 2.20251    | 1.5847    | 2.17196   | 3.02093   | 3.85933   |
| BOLA3-AS1 | -0.0842313 | -0.177293  | 1.0357    | 0.999755  | -0.827177 | -1.006    |
| BOP1      | 3.98039    | 3.78626    | 3.48714   | 3.78901   | 4.45862   | 4.57057   |
| BORA      | 3.13278    | 3.09066    | 3.04626   | 3.42031   | 2.81586   | 3.42838   |
| BPGM      | 3.20027    | 3.3653     | 3.3653    | 3.90519   | 3.92276   | 4.42514   |
| BPHL      | 2.22981    | 2.24795    | 2.84554   | 3.00157   | 2.42976   | 2.35379   |
| BPNT1     | 4.09614    | 4.07436    | 3.40707   | 3.74915   | 3.91238   | 4.38075   |
| BPTF      | 6.15552    | 5.98687    | 6.43742   | 6.23891   | 6.95984   | 6.6233    |
| BRAF      | 5.09478    | 5.09709    | 4.86213   | 4.90494   | 5.18861   | 5.11188   |
| BRAP      | 3.96892    | 4.0139     | 3.1541    | 3.35266   | 3.64004   | 3.57869   |
| BRAT1     | 3.30935    | 3.09558    | 3.76046   | 4.02174   | 3.69943   | 3.76089   |
| BRCA1     | 5.33537    | 5.38811    | 5.64738   | 5.84827   | 5.15106   | 5.38206   |
| BRCA2     | 5.4462     | 5.58256    | 5.7435    | 5.98127   | 4.56249   | 4.89597   |
| BRCC3     | 3.58756    | 3.68585    | 3.74091   | 4.15608   | 4.85434   | 4.75004   |
| BRCC3P1   | -0.342484  | -0.0735344 | 0.750375  | 0.731557  | 0.680585  | 0.261567  |
| BRD1      | 3.9909     | 3.85908    | 4.39107   | 4.35163   | 3.33687   | 3.03813   |
| BRD2      | 6.58029    | 6.56197    | 6.08058   | 6.28618   | 6.68342   | 6.54538   |
| BRD3      | 3.68138    | 3.37451    | 3.64981   | 3.55273   | 3.01858   | 2.87203   |
| BRD4      | 4.64577    | 4.52157    | 4.18388   | 4.04092   | 4.3997    | 4.29046   |
| BRD7      | 5.03994    | 5.00882    | 4.97859   | 5.06527   | 5.61609   | 5.3355    |
| BRD7P2    | 3.86886    | 3.91257    | 3.73915   | 3.91959   | 4.6848    | 4.44458   |
| BRD8      | 5.19156    | 5.14679    | 5.59085   | 5.73508   | 5.17139   | 4.89412   |
| BRD9      | 5.074      | 5.00829    | 4.46393   | 4.57328   | 4.8174    | 4.29187   |
| BRE       | 4.02292    | 4.00826    | 3.25527   | 3.5878    | 3.93491   | 4.39788   |

|          |           |            |            |          |           |           |
|----------|-----------|------------|------------|----------|-----------|-----------|
| BRF1     | 3.72718   | 3.45154    | 2.58798    | 2.57066  | 2.98716   | 2.78915   |
| BRF2     | 3.08456   | 3.11622    | 3.27708    | 3.41526  | 2.37467   | 2.57911   |
| BRI3     | 3.54649   | 3.32292    | 3.97962    | 4.42085  | 3.64513   | 3.6398    |
| BRI3BP   | 4.62006   | 4.24833    | 3.73928    | 3.79224  | 3.83312   | 3.4448    |
| BRICD5   | 0.947576  | 0.915651   | 1.15851    | 0.90465  | 0.19672   | -0.134056 |
| BRIP1    | 4.86694   | 4.94121    | 4.84368    | 4.95253  | 4.83753   | 4.66069   |
| BRIX1    | 4.90512   | 5.00279    | 4.99876    | 5.37939  | 5.31091   | 5.91453   |
| BRK1     | 4.90547   | 4.61796    | 4.57136    | 4.86055  | 5.8571    | 5.8848    |
| BRMS1    | 4.17282   | 4.10985    | 3.95986    | 4.49108  | 3.80423   | 4.16826   |
| BRMS1L   | 1.94506   | 2.2934     | 1.56404    | 1.82247  | 2.16267   | 2.37767   |
| BROX     | 5.31017   | 5.49083    | 4.6806     | 5.20634  | 5.498     | 5.76689   |
| BRPF1    | 4.11791   | 4.02297    | 3.48003    | 3.6494   | 3.82349   | 3.44304   |
| BRPF3    | 3.4895    | 3.34772    | 3.95091    | 3.97465  | 3.55036   | 3.13878   |
| BRSK1    | 2.41207   | 1.9508     | 1.63029    | 1.83957  | 2.4351    | 2.2475    |
| BRSK2    | 2.17746   | 1.54281    | 1.24279    | 0.95732  | -1.90489  | -3.70484  |
| BRWD1    | 6.8187    | 6.76098    | 7.04364    | 7.0312   | 6.86068   | 6.7261    |
| BRWD3    | 5.33572   | 5.19       | 5.67289    | 5.42789  | 5.86543   | 5.51183   |
| BSCL2    | 3.25313   | 3.08566    | 3.55141    | 3.91595  | 3.28996   | 3.89413   |
| BSDC1    | 4.8915    | 5.00372    | 4.89663    | 5.21536  | 5.64034   | 5.80155   |
| BSG      | 6.58672   | 6.41795    | 6.46463    | 6.65036  | 7.2582    | 7.44868   |
| BSN      | 1.7928    | 1.40138    | 0.259532   | 0.100749 | -0.777433 | -1.31405  |
| BST2     | 1.60474   | 1.45605    | 5.29372    | 5.47378  | 3.01741   | 2.86694   |
| BTAf1    | 6.11789   | 6.0121     | 5.41682    | 5.4662   | 6.40397   | 5.98025   |
| BTBD1    | 5.19422   | 5.46378    | 4.87775    | 5.38446  | 6.21864   | 6.83505   |
| BTBD10   | 3.75606   | 3.92402    | 3.5408     | 4.01082  | 3.87274   | 4.41168   |
| BTBD11   | ?         | ?          | 1.24279    | 1.73669  | -3.19956  | -4.11926  |
| BTBD18   | 0.388476  | 0.151976   | 0.488988   | 0.231137 | 0.373208  | -0.577229 |
| BTBD19   | 0.388476  | 0.278722   | 2.42382    | 2.52054  | 2.42981   | 1.76905   |
| BTBD2    | 3.26535   | 2.69101    | 3.42546    | 3.1835   | 3.38722   | 2.74449   |
| BTBD3    | 5.62601   | 6.01059    | 3.76553    | 4.26756  | 6.31465   | 6.85774   |
| BTBD6    | 4.56301   | 4.72388    | 2.82741    | 3.28349  | 4.09375   | 4.46696   |
| BTBD7    | 4.76189   | 4.63188    | 4.15854    | 4.10428  | 4.8445    | 4.3634    |
| BTBD9    | 2.78272   | 3.06659    | 2.51346    | 2.56714  | 4.50144   | 4.58214   |
| BTd      | 3.85352   | 3.74441    | 2.90198    | 3.22801  | 3.25656   | 3.63672   |
| BTF3     | 6.66252   | 6.70432    | 6.60846    | 7.17398  | 7.32855   | 7.78011   |
| BTF3L4   | 4.2095    | 4.44597    | 3.8171     | 4.60673  | 5.09715   | 5.43512   |
| BTF3L4P2 | 2.64662   | 2.78578    | 2.31821    | 2.70271  | 3.0027    | 3.88822   |
| BTF3P10  | 3.41405   | 3.45104    | 3.46331    | 3.8663   | 4.0111    | 4.48841   |
| BTF3P5   | 0.253554  | 0.725602   | 0.354824   | 0.6862   | 1.03721   | 1.18626   |
| BTF3P7   | 0.952088  | 1.10524    | 1.02476    | 1.67465  | 1.53923   | 1.75374   |
| BTF3P9   | -0.256668 | -0.0721688 | 0.0439604  | 0.28193  | 0.533842  | 0.974397  |
| BTG1     | 6.50843   | 6.43688    | 5.16465    | 5.05414  | 4.12268   | 4.37143   |
| BTG2     | 1.68466   | 1.59788    | 0.00643448 | 0.231137 | -0.374735 | 0.0213376 |
| BTG3     | 4.15266   | 3.42742    | 3.49413    | 3.47237  | 3.7512    | 3.66615   |
| BTN2A1   | 3.84837   | 3.89344    | 4.37003    | 4.8277   | 4.70095   | 4.50649   |
| BTN2A2   | 3.93592   | 3.8502     | 3.85273    | 3.76793  | 4.32142   | 4.06956   |
| BTN2A3P  | 1.37353   | 1.23069    | 2.40145    | 2.45724  | 1.89813   | 1.20023   |
| BTN3A1   | 2.88908   | 3.07966    | 4.49394    | 4.62469  | 4.24689   | 4.36443   |
| BTN3A2   | 3.4389    | 3.41311    | 4.88107    | 5.09899  | 4.80075   | 5.20323   |
| BTN3A3   | 1.78058   | 1.90566    | 4.39678    | 4.60547  | 3.70469   | 3.74001   |
| BTRC     | 3.59209   | 3.83178    | 3.66667    | 4.12118  | 4.20462   | 4.4607    |
| BUB1     | 5.72876   | 5.76174    | 5.29827    | 5.85404  | 5.79529   | 5.88807   |

|             |           |             |           |          |           |           |
|-------------|-----------|-------------|-----------|----------|-----------|-----------|
| BUB1B       | 6.09615   | 6.09333     | 5.14518   | 5.38833  | 5.53109   | 5.42386   |
| BUB3        | 6.07281   | 6.28048     | 5.76701   | 6.29363  | 6.60295   | 6.88759   |
| BUB3P1      | -0.191134 | 0.151976    | -0.183372 | 0.231137 | 0.107996  | 0.315752  |
| BUD13       | 3.35621   | 3.2289      | 2.80233   | 2.97333  | 2.99434   | 2.98329   |
| BUD31       | 4.53483   | 4.60124     | 3.91968   | 4.40343  | 4.79838   | 5.4524    |
| BVES        | 3.75006   | 3.45154     | 3.66039   | 4.04851  | 6.21791   | 6.26124   |
| BX322557.10 | 1.78073   | 1.67674     | 3.44035   | 3.46293  | 2.15989   | 2.22994   |
| BX470102.3  | 0.863225  | 1.06077     | 0.324373  | 0.711424 | -0.121008 | 0.597145  |
| BX842568.2  | 0.411882  | 0.570317    | 0.704553  | 1.18222  | 1.74968   | 1.47858   |
| BYSL        | 3.28961   | 3.28367     | 2.72338   | 3.00753  | 3.97903   | 4.06478   |
| BZW1        | 6.72567   | 6.92025     | 5.76077   | 6.30658  | 6.84452   | 7.39927   |
| BZW1P1      | 1.58796   | 1.90109     | 1.55122   | 1.7204   | 1.81672   | 1.69771   |
| BZW1P2      | 5.4212    | 5.56358     | 4.41927   | 4.99762  | 5.48038   | 6.30239   |
| BZW2        | 5.88988   | 5.91515     | 5.22229   | 5.30194  | 5.7565    | 5.91273   |
| C10orf10    | 4.22647   | 4.23325     | 1.63669   | 2.08102  | 3.88078   | 2.56942   |
| C10orf12    | 3.71137   | 3.58836     | 4.04409   | 4.14147  | 4.89858   | 4.57173   |
| C10orf2     | 4.2667    | 4.29619     | 2.71736   | 2.94375  | 4.63888   | 4.49296   |
| C10orf32    | 2.23615   | 2.10529     | 0.286503  | 0.786069 | 2.93206   | 3.18118   |
| C10orf35    | -0.998365 | -1.46246    | 0.805235  | 0.913608 | 0.670686  | 0.668401  |
| C10orf76    | 3.04071   | 3.08212     | 3.56299   | 3.66101  | 3.5649    | 3.39131   |
| C10orf88    | 2.36996   | 2.44472     | 2.41621   | 2.82478  | 3.3422    | 3.56696   |
| C10orf90    | 4.43982   | 4.19357     | -2.86056  | -1.71605 | 0.448309  | 0.33778   |
| C11orf1     | 0.516277  | 0.722134    | 2.01981   | 2.61389  | 1.32143   | 2.46418   |
| C11orf24    | 4.94116   | 4.74965     | 3.5962    | 4.07852  | 3.82752   | 3.76699   |
| C11orf30    | 4.95599   | 4.9257      | 4.78153   | 4.82559  | 3.67396   | 3.18203   |
| C11orf31    | 3.42245   | 3.31852     | 2.54441   | 2.66597  | 3.91239   | 4.57289   |
| C11orf45    | -0.549135 | -0.140771   | 0.503064  | 1.40691  | -3.07415  | -1.38442  |
| C11orf49    | 2.73764   | 2.82948     | 3.35564   | 3.8145   | 4.07864   | 4.22402   |
| C11orf54    | 2.13383   | 2.07723     | 3.24298   | 3.37036  | 3.17258   | 3.22911   |
| C11orf57    | 3.10731   | 2.97102     | 4.26647   | 4.50288  | 4.66915   | 4.93278   |
| C11orf58    | 5.83018   | 5.95396     | 6.04943   | 6.40645  | 5.80061   | 6.09718   |
| C11orf63    | -1.14419  | -1.0363     | 0.816551  | 1.35882  | 1.91714   | 2.16367   |
| C11orf68    | 4.21008   | 4.26846     | 3.18933   | 3.79505  | 2.78471   | 2.90432   |
| C11orf71    | 0.456638  | -0.00188106 | 2.48157   | 2.60996  | 1.84244   | 1.70955   |
| C11orf73    | 2.17622   | 2.13791     | 3.10441   | 3.46195  | 2.98108   | 4.01461   |
| C11orf74    | 1.2996    | 1.30169     | 1.2622    | 1.44654  | -0.682814 | -0.280287 |
| C11orf80    | 1.72519   | 1.73731     | 1.67551   | 1.73247  | 1.41251   | 1.3167    |
| C11orf84    | 3.83522   | 3.57469     | 3.37872   | 3.6191   | 3.58762   | 3.27343   |
| C11orf95    | 3.50548   | 3.13148     | 3.35176   | 3.41473  | 2.54671   | 1.88577   |
| C11orf98    | 3.97099   | 4.05594     | 3.02731   | 3.29194  | 3.97364   | 4.38702   |
| C12orf10    | 3.62357   | 3.57427     | 2.92066   | 3.41974  | 3.34791   | 3.46904   |
| C12orf29    | 3.68716   | 3.95785     | 2.86748   | 3.25036  | 3.58311   | 4.35714   |
| C12orf4     | 3.95017   | 4.21046     | 3.60438   | 3.92597  | 3.88658   | 4.80997   |
| C12orf43    | 3.74303   | 3.64174     | 2.76485   | 3.17195  | 2.78885   | 2.79314   |
| C12orf45    | 2.73139   | 2.80629     | 1.10193   | 1.60545  | 2.08454   | 2.38077   |
| C12orf49    | 4.69377   | 4.98526     | 3.50298   | 4.11758  | 4.16226   | 4.37676   |
| C12orf57    | 4.04021   | 3.86622     | 3.2474    | 3.91744  | 3.38853   | 4.54042   |
| C12orf60    | 0.50068   | 0.331671    | 0.782333  | 1.01017  | -0.987612 | -0.4586   |
| C12orf65    | 4.76903   | 4.72202     | 3.7128    | 3.82042  | 4.06931   | 3.17593   |
| C12orf66    | 2.46584   | 2.35095     | 1.77651   | 2.17659  | 1.38958   | 1.44308   |
| C12orf73    | 2.29449   | 2.13303     | 1.64338   | 1.75264  | 1.6392    | 0.264729  |
| C12orf75    | 4.18128   | 4.68562     | 2.48891   | 3.4948   | 3.02269   | 4.05815   |

|                |          |          |           |           |           |           |
|----------------|----------|----------|-----------|-----------|-----------|-----------|
| C12orf76       | 2.73712  | 2.62721  | 2.20244   | 2.01473   | 2.15973   | 1.8381    |
| C12orf79       | 1.20821  | 1.20163  | -0.586833 | -2.10822  | -1.41201  | -1.45835  |
| C14orf1        | 3.32468  | 2.92948  | 2.18282   | 2.20407   | 2.86522   | 2.83633   |
| C14orf119      | 4.0926   | 4.26535  | 3.37479   | 3.9273    | 4.44818   | 5.25304   |
| C14orf132      | 2.15892  | 2.23761  | 4.52986   | 4.7973    | 0.0540566 | 0.270672  |
| C14orf142      | 2.06581  | 2.26509  | 1.20023   | 1.69211   | 2.48945   | 3.19114   |
| C14orf159      | 2.62286  | 2.75875  | 4.04425   | 4.19635   | 2.51246   | 2.5925    |
| C14orf166      | 5.63828  | 5.67126  | 4.6882    | 5.05068   | 5.43455   | 6.06807   |
| C14orf2        | 4.46395  | 4.49208  | 3.35952   | 3.87274   | 4.28073   | 5.2677    |
| C14orf79       | 2.49076  | 2.53152  | 1.0357    | 1.50592   | 2.20079   | 1.92267   |
| C14orf80       | 2.6467   | 2.16889  | 1.0353    | 0.923149  | 0.448309  | 1.20023   |
| C14orf93       | 1.78476  | 1.6953   | 1.57744   | 1.63865   | 1.04018   | 1.34861   |
| C15orf38-AP3S2 | 3.387    | 3.45707  | 3.23408   | 3.57331   | 2.73084   | 2.75418   |
| C15orf39       | 3.51281  | 3.53997  | 3.44947   | 3.38503   | 2.65937   | 2.41742   |
| C15orf40       | 3.52321  | 3.58524  | 3.35644   | 3.50349   | 3.31731   | 3.79853   |
| C15orf41       | 2.86698  | 2.89031  | 0.893354  | 0.563685  | 2.37862   | 2.16982   |
| C15orf52       | 5.75315  | 5.7821   | 4.04409   | 4.63684   | 4.27633   | 4.0465    |
| C15orf57       | 2.9747   | 2.94152  | 3.00325   | 3.15402   | 2.97978   | 2.9551    |
| C15orf61       | 1.399    | 1.23764  | 0.416483  | 0.736735  | 1.12053   | 1.65964   |
| C15orf62       | 0.769916 | 0.552436 | 0.6317    | 0.74516   | 0.290955  | -0.222966 |
| C16orf13       | 2.6206   | 2.37006  | 2.28002   | 2.84828   | 2.72556   | 3.20318   |
| C16orf45       | 3.06247  | 3.15187  | 2.39014   | 3.22209   | -3.85089  | -4.70296  |
| C16orf52       | 5.78817  | 5.78255  | 3.48061   | 3.90521   | 3.46968   | 3.51004   |
| C16orf58       | 4.22256  | 4.10771  | 4.97159   | 5.3236    | 3.99776   | 4.35038   |
| C16orf59       | 2.54886  | 2.31196  | 2.17405   | 2.32998   | 2.44299   | 2.60163   |
| C16orf62       | 3.3252   | 3.33063  | 2.86728   | 3.16612   | 2.39883   | 2.57017   |
| C16orf70       | 3.17803  | 3.05018  | 3.58767   | 3.81686   | 3.95264   | 3.86668   |
| C16orf72       | 6.70588  | 6.59729  | 6.9312    | 7.02536   | 7.32626   | 6.82803   |
| C16orf74       | ?        | ?        | -0.183372 | 0.0612232 | -0.121008 | 0.443129  |
| C16orf87       | 2.47086  | 2.49136  | 3.29424   | 3.66431   | 3.26005   | 3.4354    |
| C16orf91       | 2.31496  | 2.1738   | 1.8772    | 2.17659   | 2.3593    | 2.76497   |
| C16orf93       | 0.873451 | 0.305305 | 1.77923   | 1.81778   | 1.29077   | 0.685537  |
| C17orf100      | 0.45076  | 0.151976 | 0.156448  | 0.300663  | 0.339787  | 0.401903  |
| C17orf49       | 2.34793  | 2.41693  | 2.08211   | 2.29011   | 3.0439    | 3.16785   |
| C17orf51       | 3.10518  | 3.21701  | 3.20607   | 3.82668   | 3.47415   | 3.0664    |
| C17orf53       | 2.42247  | 2.20606  | 2.29627   | 2.65937   | 2.19458   | 1.88577   |
| C17orf58       | 1.69756  | 1.87703  | 1.78805   | 1.99448   | 3.3411    | 3.35937   |
| C17orf59       | 0.760425 | 0.456112 | 0.699196  | 1.25754   | 1.22238   | 1.88577   |
| C17orf62       | 4.46771  | 4.19714  | 4.67368   | 4.73665   | 5.59353   | 5.37808   |
| C17orf75       | 2.76853  | 3.00273  | 2.79376   | 2.9997    | 2.89428   | 3.27057   |
| C17orf80       | 4.25073  | 4.26167  | 4.21308   | 4.48362   | 4.93541   | 5.30939   |
| C17orf85       | 4.85551  | 4.8472   | 5.16962   | 5.18061   | 5.2112    | 4.67158   |
| C17orf89       | 4.49507  | 4.38889  | 2.77068   | 3.01271   | 4.13572   | 4.64311   |
| C17orf96       | 2.44559  | 2.0956   | 0.686917  | 0.761609  | 1.96907   | 0.878317  |
| C18orf21       | 2.38382  | 2.35798  | 2.03587   | 2.2522    | 1.89692   | 2.3021    |
| C18orf25       | 5.52519  | 5.59511  | 4.20879   | 4.42837   | 4.36067   | 4.26757   |
| C18orf32       | 1.56349  | 1.71334  | 0.955491  | 1.50094   | 1.81005   | 2.03739   |
| C18orf54       | 3.96803  | 3.94653  | 3.33218   | 3.18809   | 2.01214   | 1.88577   |
| C18orf8        | 2.78006  | 2.79805  | 2.37213   | 3.03885   | 2.10949   | 2.33846   |
| C19orf12       | 3.06081  | 3.04891  | 3.45311   | 3.69369   | 4.15667   | 4.31565   |
| C19orf24       | 2.01175  | 1.73686  | 1.5714    | 1.77384   | 2.89044   | 3.48804   |
| C19orf25       | 2.17746  | 2.12963  | 1.88797   | 2.30481   | 3.4298    | 4.19717   |

|           |            |           |          |          |           |            |
|-----------|------------|-----------|----------|----------|-----------|------------|
| C19orf43  | 4.57413    | 4.56781   | 3.87987  | 4.34032  | 5.32981   | 5.31981    |
| C19orf44  | 2.40475    | 2.40616   | 1.82588  | 1.78258  | 2.59802   | 2.44301    |
| C19orf47  | 2.32053    | 2.29539   | 2.28002  | 2.58118  | 3.01565   | 2.68131    |
| C19orf48  | 4.83327    | 4.65803   | 4.06083  | 4.46576  | 4.65878   | 4.5982     |
| C19orf52  | 1.91933    | 1.81795   | 1.7234   | 1.93012  | 2.7363    | 2.84788    |
| C19orf53  | 4.33121    | 4.25524   | 3.51765  | 3.86767  | 5.49883   | 5.71856    |
| C19orf54  | 0.871631   | 0.503786  | 1.53104  | 1.18619  | 0.540454  | 0.338932   |
| C19orf60  | 1.90086    | 1.8681    | 1.46757  | 1.59165  | 2.47925   | 2.74862    |
| C19orf66  | 2.26799    | 2.27573   | 2.81884  | 3.23005  | 2.93947   | 2.78537    |
| C19orf68  | 0.62629    | 0.4039    | 0.741954 | 0.679036 | 0.635792  | -0.0439746 |
| C19orf70  | 2.68031    | 2.57458   | 2.0405   | 2.44193  | 3.59708   | 4.73726    |
| C1D       | 2.88606    | 3.01014   | 2.21265  | 2.38441  | 3.00855   | 3.0163     |
| C1DP1     | 2.13185    | 2.00451   | 1.23172  | 1.66515  | 2.12531   | 3.09237    |
| C1GALT1   | 4.5577     | 5.05581   | 3.85127  | 4.23657  | 4.50396   | 5.02885    |
| C1GALT1C1 | 3.35349    | 3.20605   | 3.73535  | 4.08222  | 5.07434   | 5.72896    |
| C1QBP     | 6.29942    | 6.35799   | 5.62591  | 6.08002  | 7.2783    | 7.71808    |
| C1QBPP2   | 1.08178    | 1.40694   | 0.828989 | 0.957811 | 2.19012   | 1.95277    |
| C1QL1     | -0.289526  | -1.2146   | 0.27602  | 0.399062 | 1.56854   | 0.993783   |
| C1QTNF1   | 3.60356    | 3.4826    | 0.860939 | 1.38307  | 4.6088    | 3.83825    |
| C1QTNF6   | 0.289705   | 0.265185  | 4.46294  | 3.9536   | -1.41201  | -1.70626   |
| C1R       | 6.84158    | 6.06898   | 7.96913  | 8.38361  | 1.04711   | 0.893261   |
| C1RL      | 4.581      | 3.99416   | 4.93899  | 5.04553  | 2.49062   | 2.26384    |
| C1RL-AS1  | 3.3267     | 3.02995   | 4.17842  | 4.14007  | -0.672635 | -0.99638   |
| C1S       | 5.86648    | 5.12258   | 7.3366   | 7.6333   | -1.57243  | -2.8983    |
| C1orf106  | 2.8495     | 2.49136   | 0.82777  | 0.833756 | -3.19956  | -4.11926   |
| C1orf109  | 4.04659    | 4.03101   | 3.31233  | 3.61569  | 3.73092   | 3.75476    |
| C1orf112  | 4.43843    | 4.52801   | 3.5789   | 3.8777   | 3.57659   | 3.83981    |
| C1orf122  | 2.83659    | 2.86562   | 1.96576  | 2.36514  | 3.45786   | 4.64634    |
| C1orf123  | 3.21232    | 3.01492   | 3.71432  | 3.81894  | 3.58709   | 3.55773    |
| C1orf131  | 2.60014    | 2.67416   | 2.39392  | 2.59162  | 2.6135    | 3.13878    |
| C1orf132  | 2.83231    | 3.16652   | 4.94252  | 4.86772  | 2.59237   | 1.62424    |
| C1orf147  | -0.0124477 | -0.433278 | 1.12224  | 1.19964  | -0.878698 | -1.06257   |
| C1orf159  | 1.87838    | 1.58158   | 1.97637  | 1.83957  | 1.65714   | 1.34861    |
| C1orf174  | 3.30233    | 3.38713   | 3.26149  | 3.636    | 4.24359   | 4.14971    |
| C1orf198  | 4.66833    | 4.73314   | 3.0525   | 4.30269  | 5.60058   | 5.66669    |
| C1orf21   | 5.64908    | 5.1324    | 3.76776  | 3.27272  | 2.71038   | 2.62422    |
| C1orf216  | 4.31772    | 4.51156   | 3.78658  | 4.29525  | 4.48371   | 4.4187     |
| C1orf220  | 1.28878    | 1.15925   | -1.09576 | -1.40802 | -0.753191 | -1.06257   |
| C1orf226  | 2.59938    | 2.41871   | -1.86109 | -1.24444 | 2.27895   | 3.00822    |
| C1orf27   | 4.44876    | 4.50438   | 3.99762  | 4.26622  | 4.4805    | 4.81685    |
| C1orf35   | 2.25222    | 2.22717   | 1.98141  | 2.16265  | 2.65485   | 2.47321    |
| C1orf43   | 6.27156    | 6.43161   | 5.31731  | 5.87344  | 6.51194   | 7.27469    |
| C1orf50   | 0.760425   | 1.19542   | 1.98642  | 2.35062  | 1.58769   | 1.91536    |
| C1orf52   | 3.40945    | 3.25311   | 3.44583  | 3.67906  | 4.2162    | 4.19565    |
| C1orf56   | 1.17217    | 1.19799   | 1.02601  | 1.26657  | 1.34578   | 1.44944    |
| C1orf74   | 3.10224    | 3.12824   | 2.85181  | 2.92751  | 2.47728   | 2.55195    |
| C20orf144 | 0.356302   | 0.151976  | 1.48185  | 1.49112  | 0.395063  | -1.12145   |
| C20orf194 | 3.43717    | 3.29163   | 4.06893  | 4.23575  | 3.57408   | 3.33274    |
| C20orf196 | -0.129081  | 0.195474  | 0.914572 | 1.27492  | 0.587701  | 1.33772    |
| C20orf24  | 5.32276    | 5.36148   | 5.61836  | 6.27532  | 5.35926   | 6.2348     |
| C20orf27  | 3.04239    | 2.89031   | 3.47825  | 3.71773  | 3.2254    | 3.34585    |
| C20orf96  | -0.0990262 | -0.036446 | 1.98141  | 1.72409  | -0.753191 | -0.799586  |



|          |           |             |           |           |            |           |
|----------|-----------|-------------|-----------|-----------|------------|-----------|
| C21orf2  | 0.916614  | 0.597469    | 2.14434   | 2.27433   | 0.849647   | 1.01223   |
| C21orf33 | 1.64486   | 1.48986     | 1.9492    | 2.0489    | 1.10067    | 1.77505   |
| C21orf58 | 2.99441   | 2.60325     | 4.09492   | 3.94645   | 2.17576    | 1.50278   |
| C21orf59 | 3.72327   | 3.86011     | 3.43787   | 3.80662   | 3.98686    | 4.28327   |
| C21orf91 | 3.57588   | 3.65479     | 5.06617   | 4.58987   | 2.62972    | 1.86317   |
| C22orf29 | 4.36763   | 4.47213     | 4.24279   | 4.59647   | 3.43205    | 3.22402   |
| C22orf39 | 3.57227   | 3.65035     | 3.10505   | 3.31624   | 3.25761    | 3.37864   |
| C22orf46 | 4.14405   | 3.84662     | 3.87175   | 3.69369   | 3.14059    | 2.23582   |
| C2CD2    | 4.62227   | 4.74234     | 5.79553   | 5.94202   | 4.11448    | 4.00409   |
| C2CD2L   | 3.08132   | 3.25901     | 3.14975   | 3.38576   | 2.85014    | 2.71863   |
| C2CD3    | 4.62733   | 4.71954     | 4.78729   | 4.86054   | 4.23678    | 4.21364   |
| C2CD5    | 4.46393   | 4.44854     | 3.81366   | 3.66431   | 3.69724    | 3.81096   |
| C2orf16  | 1.6585    | 1.41984     | 1.0357    | 0.57776   | 0.679613   | 0.522196  |
| C2orf27A | 0.857925  | 1.142       | -1.3263   | -1.04039  | 0.681035   | 1.34024   |
| C2orf42  | 2.11472   | 2.30535     | 1.89332   | 2.2086    | 2.49705    | 2.80899   |
| C2orf44  | 3.80968   | 3.86246     | 3.05489   | 3.29844   | 4.27484    | 4.48188   |
| C2orf47  | 2.34196   | 2.46215     | 1.86134   | 2.23969   | 2.67621    | 3.52475   |
| C2orf49  | 3.99758   | 4.21311     | 3.59554   | 3.87885   | 4.2988     | 4.23579   |
| C2orf68  | 3.97069   | 3.96446     | 3.52211   | 3.52416   | 4.39496    | 4.16826   |
| C2orf69  | 3.87661   | 4.11187     | 3.51691   | 3.80416   | 4.9805     | 4.87448   |
| C2orf74  | 2.8185    | 2.78818     | 2.32646   | 2.6117    | 3.37309    | 3.84154   |
| C2orf76  | 1.21386   | 1.17383     | 0.416483  | -0.108683 | 1.06084    | 1.44308   |
| C2orf88  | 1.66289   | 1.95503     | 1.5847    | 1.52784   | 2.38683    | 2.22404   |
| C3       | 7.2245    | 6.25931     | 7.0081    | 7.83685   | -1.61549   | -0.280287 |
| C3AR1    | -2.61075  | -2.21426    | -0.659745 | 0.535117  | -0.374735  | 1.65964   |
| C3orf14  | 1.7968    | 1.67161     | -5.1783   | -4.52056  | -5.07051 ? |           |
| C3orf17  | 4.65719   | 4.71256     | 4.68133   | 4.97662   | 4.48807    | 4.74134   |
| C3orf18  | 2.00138   | 1.87257     | 1.66826   | 2.17196   | 1.14709    | 1.47324   |
| C3orf33  | 0.631914  | 0.6247      | -5.1783   | -3.78492  | 0.479334   | 0.50283   |
| C3orf38  | 3.9046    | 3.97073     | 3.52504   | 3.83443   | 3.90829    | 4.58122   |
| C3orf52  | 1.43539   | 1.70209     | 1.75314   | 1.79207 ? | ?          |           |
| C3orf58  | 4.0005    | 3.93484     | 3.90923   | 4.1638    | 3.41652    | 2.43285   |
| C3orf62  | 2.01519   | 1.98012     | 1.85542   | 1.93559   | 3.05051    | 2.677     |
| C3orf67  | 0.41996   | 0.840999    | -3.59683  | -5.10387  | 0.427241   | 0.702755  |
| C3orf70  | 3.30092   | 3.57057     | -6.17309  | -5.10387  | -5.65305 ? |           |
| C4A      | -1.90978  | -2.11548    | 1.19629   | 0.679289  | 0.800869   | 0.173895  |
| C4orf19  | 0.781863  | 1.34312     | -2.22183  | -3.78492  | 0.89096    | 1.48305   |
| C4orf27  | 2.8087    | 2.81326     | 2.63027   | 3.12957   | 3.14865    | 3.84979   |
| C4orf29  | 2.41187   | 2.61131     | 2.32032   | 2.50221   | 3.07061    | 2.91155   |
| C4orf3   | 4.14875   | 3.96132     | 4.11224   | 4.08962   | 5.50678    | 5.07874   |
| C4orf33  | 1.03183   | 1.28651     | 2.50066   | 2.43602   | 2.33356    | 2.6789    |
| C4orf46  | 3.77082   | 3.72788     | 3.53415   | 3.63601   | 3.48481    | 3.02121   |
| C5       | 2.36163   | 2.21665     | 2.83885   | 2.96532   | 0.714804   | 1.25912   |
| C5orf15  | 6.26737   | 6.25017     | 6.34847   | 6.43022   | 6.00599    | 5.51055   |
| C5orf22  | 3.87833   | 3.83522     | 3.80658   | 4.19951   | 4.76542    | 4.80996   |
| C5orf24  | 5.27642   | 5.23773     | 5.25734   | 5.29842   | 5.83462    | 5.55877   |
| C5orf28  | 1.78476   | 2.3218      | 1.85542   | 2.3424    | 2.13087    | 2.5787    |
| C5orf30  | 3.57004   | 3.64698     | 3.54609   | 3.85407   | 3.83454    | 3.69843   |
| C5orf34  | 2.26199   | 2.29116     | 3.01371   | 3.45727   | 2.54555    | 2.81984   |
| C5orf42  | 4.65955   | 4.52227     | 5.71507   | 5.53052   | 5.141      | 5.03642   |
| C5orf45  | 3.834     | 3.78837     | 5.23648   | 5.54619   | 4.67246    | 4.26842   |
| C5orf46  | -0.632781 | -0.440295 ? | ?         |           | 3.26301    | 1.47324   |

|                |            |           |           |          |            |            |
|----------------|------------|-----------|-----------|----------|------------|------------|
| C5orf51        | 4.33778    | 4.13147   | 4.11912   | 4.50496  | 5.01652    | 5.00236    |
| C5orf56        | 0.568713   | 0.777005  | 3.23805   | 3.25005  | 0.849255   | 0.732929   |
| C5orf66        | 1.38151    | 1.7153    | 4.07673   | 3.82523  | 2.35909    | 2.00216    |
| C6orf1         | 2.14643    | 2.13709   | 1.33222   | 1.94105  | 2.27928    | 2.62869    |
| C6orf106       | 5.0841     | 5.07384   | 5.7043    | 6.08306  | 6.15549    | 6.0625     |
| C6orf120       | 4.18851    | 3.94039   | 3.68843   | 3.65086  | 5.29438    | 5.51301    |
| C6orf136       | 1.10833    | 0.785149  | 0.73541   | 1.14862  | 1.99076    | 1.80111    |
| C6orf141       | 2.39369    | 2.37637   | -4.59508  | -5.10387 | 2.67732    | 3.29047    |
| C6orf163       | 0.937608   | 0.877069  | -0.510905 | -1.52346 | 0.587701   | -0.183001  |
| C6orf203       | 1.68466    | 1.85911   | 1.75314   | 2.03585  | 2.37862    | 2.65085    |
| C6orf47        | 3.56184    | 3.72203   | 3.47647   | 3.9163   | 4.05993    | 4.41352    |
| C6orf48        | 3.96537    | 4.08597   | 4.05846   | 4.84608  | 4.80525    | 5.1372     |
| C6orf62        | 6.10716    | 6.24429   | 5.80869   | 6.31291  | 7.08924    | 7.12603    |
| C6orf89        | 5.67811    | 5.78744   | 5.5929    | 5.83732  | 6.74933    | 6.87964    |
| C7orf25        | 0.671003   | 1.1926    | 1.00487   | 0.811282 | 0.483375   | -0.0511854 |
| C7orf26        | 2.91564    | 2.92517   | 2.759     | 3.07109  | 2.82754    | 3.09419    |
| C7orf31        | -0.0550876 | -0.354149 | 0.571444  | 1.13916  | -0.878698  | -0.899103  |
| C7orf43        | 3.18172    | 2.90399   | 2.81171   | 2.69678  | 3.70991    | 3.27753    |
| C7orf49        | 4.84139    | 4.66442   | 3.93345   | 4.10448  | 4.24536    | 4.54994    |
| C7orf50        | 3.57005    | 3.08019   | 3.80374   | 3.76154  | 3.73736    | 3.88574    |
| C7orf55        | 1.10901    | 0.646421  | 0.919843  | 0.958627 | 1.78123    | 2.23624    |
| C7orf55-LUC7L2 | 5.56199    | 5.62558   | 5.3053    | 5.28381  | 5.86299    | 5.48026    |
| C7orf60        | 3.32884    | 3.34612   | 3.0453    | 3.27919  | 3.91048    | 4.39788    |
| C7orf73        | 4.4633     | 4.3795    | 4.00135   | 4.16146  | 4.71092    | 4.81684    |
| C8orf31        | -0.791952  | -1.29258  | 1.43857   | 1.49854  | -6.64581 ? |            |
| C8orf33        | 4.47958    | 4.50438   | 4.01859   | 4.33307  | 5.07312    | 5.38604    |
| C8orf37        | 0.301026   | 0.467978  | 0.805235  | 1.04098  | 1.33409    | 1.4532     |
| C8orf4         | 1.49572    | 0.894767  | -0.325375 | -1.35358 | 2.92466    | 3.4607     |
| C8orf44        | -0.464329  | -0.226388 | 1.26597   | 1.07541  | 0.498149   | 0.260712   |
| C8orf46        | -0.223192  | 0.479758  | -2.48229  | -1.93836 | 1.25263    | 2.03478    |
| C8orf58        | 3.59573    | 3.6032    | 2.44562   | 2.4869   | 3.76275    | 3.46188    |
| C8orf59        | 3.83639    | 3.91121   | 3.58144   | 3.76693  | 4.53173    | 5.40408    |
| C8orf76        | 2.69945    | 2.84892   | 2.42324   | 2.81147  | 3.16685    | 4.14321    |
| C8orf82        | 1.63187    | 1.68185   | 1.78229   | 2.0561   | 2.93774    | 2.96925    |
| C8orf88        | 0.895783   | 0.933437  | -2.96462  | -2.52686 | 0.753459   | 1.20497    |
| C9orf114       | 3.79176    | 3.66647   | 3.12474   | 3.36239  | 4.10654    | 3.94262    |
| C9orf142       | 2.01175    | 1.85006   | 1.87178   | 2.00494  | 1.94334    | 2.03478    |
| C9orf156       | 2.14329    | 1.9925    | 1.16526   | 1.49854  | 2.12107    | 2.30453    |
| C9orf16        | 2.90641    | 3.05089   | 0.996447  | 1.27492  | 1.8195     | 2.59708    |
| C9orf3         | 4.17541    | 4.24885   | 4.74942   | 4.84609  | 4.92136    | 5.10465    |
| C9orf40        | 1.8401     | 1.67674   | 1.13846   | 1.42259  | 2.0879     | 2.13251    |
| C9orf47        | -1.33699   | -0.907998 | 1.86894   | 2.01382  | 0.270529   | -1.17987   |
| C9orf69        | 3.43918    | 3.28535   | 2.7413    | 3.03839  | 3.85243    | 4.03138    |
| C9orf72        | 2.99441    | 3.23412   | 2.39014   | 2.52781  | 2.76806    | 3.27913    |
| C9orf78        | 4.35483    | 4.55814   | 3.35951   | 3.90936  | 4.70656    | 4.72687    |
| C9orf84        | -1.52875   | -1.55554  | 1.43857   | 1.15801  | -1.53062   | -1.4584    |
| C9orf85        | 2.13383    | 2.05287   | 1.48185   | 1.65939  | 2.1852     | 2.02802    |
| C9orf89        | 2.19878    | 2.31525   | 3.12482   | 3.61056  | 2.00149    | 2.3377     |
| C9orf91        | 3.31772    | 3.45899   | 2.64938   | 2.85118  | 3.41784    | 3.31288    |
| CA11           | 0.676033   | 0.697098  | 0.340141  | 0.946514 | -0.0903144 | 0.541297   |
| CA12           | 1.14018    | 1.96344   | 4.81998   | 5.75302  | 5.59089    | 6.15824    |
| CA13           | 1.45052    | 1.89912   | -0.861345 | -0.52367 | 2.59928    | 3.11347    |

|           |          |           |           |            |           |            |
|-----------|----------|-----------|-----------|------------|-----------|------------|
| CA5B      | 1.83678  | 2.06649   | 1.78407   | 2.1902     | 1.19533   | 1.36605    |
| CA5BP1    | 1.45517  | 1.16787   | 1.59809   | 1.77303    | 1.28642   | 1.17992    |
| CA8       | 0.539412 | 1.25145   | -1.32519  | -0.464785  | 1.15992   | 0.315752   |
| CA9       | -1.39121 | -2.29018  | -1.40575  | -0.892955  | 6.511     | 4.8421     |
| CAAP1     | 3.14013  | 3.30369   | 2.23012   | 2.39103    | 4.62566   | 4.50151    |
| CAB39     | 5.79176  | 5.41941   | 5.35661   | 5.47611    | 5.22843   | 4.73519    |
| CAB39L    | 1.58636  | 2.13709   | 1.71737   | 2.32164    | 2.3026    | 3.13249    |
| CABIN1    | 4.76086  | 4.71706   | 5.10187   | 5.20971    | 4.52703   | 4.26912    |
| CABLES1   | 2.30937  | 2.12094   | 2.90118   | 2.7993     | 2.88654   | 2.62153    |
| CABLES2   | 2.76036  | 2.62197   | 2.96114   | 3.13435    | 2.43246   | 1.97279    |
| CABP4     | ?        | -6.45019  | 1.35568   | 1.3412     | -6.64581  | -5.69922   |
| CABYR     | 1.48649  | 1.7195    | -0.653237 | -1.19498   | -2.00481  | -1.70626   |
| CACFD1    | 0.278306 | -0.681268 | 1.40148   | 1.37503    | 0.36215   | -0.0341529 |
| CACHD1    | 3.20631  | 3.26508   | 2.65254   | 2.34652    | 1.32842   | 1.08775    |
| CACNA1C   | -5.69162 | -4.13839  | 4.02053   | 4.07628    | -5.07051  | -3.70484   |
| CACNA1G   | -3.69722 | -4.43123  | 2.5512    | 1.83957    | -4.97442  | ?          |
| CACNA2D1  | 1.32333  | 1.86361   | -3.18222  | -3.52222   | ?         | ?          |
| CACNA2D4  | 1.69756  | 1.35738   | -0.206089 | -0.616766  | -0.302594 | -1.38442   |
| CACNB1    | 1.95558  | 1.86107   | 1.30838   | 1.4458     | 1.5059    | 1.11352    |
| CACNB2    | 0.67123  | 1.22186   | 0.191626  | 0.231137   | 1.00351   | 0.270672   |
| CACNB3    | 2.5006   | 2.43501   | 3.1111    | 2.93284    | 2.72556   | 2.70269    |
| CACNG8    | 0.658554 | 0.292146  | 2.09727   | 2.1296     | -3.6585   | ?          |
| CACTIN    | 2.86259  | 2.43651   | 2.54028   | 2.45223    | 3.06862   | 2.58025    |
| CACUL1    | 5.44013  | 5.58598   | 5.53243   | 5.9836     | 6.54729   | 6.5403     |
| CACYBP    | 6.07236  | 6.14502   | 5.19394   | 5.64333    | 6.05052   | 6.42077    |
| CACYBPP2  | 4.64207  | 4.79244   | 3.85189   | 4.24154    | 4.44226   | 5.3118     |
| CAD       | 5.85793  | 5.75691   | 4.59782   | 4.6872     | 5.22653   | 4.96747    |
| CADM1     | 7.16083  | 6.80801   | 5.26974   | 6.05009    | 6.2479    | 6.48555    |
| CADM3     | 6.04593  | 5.71478   | -1.87527  | -1.12354   | -6.34713  | -4.46827   |
| CADM3-AS1 | 2.23791  | 2.0849    | -5.91681  | -4.88337   | -7.02289  | -6.32604   |
| CADM4     | 5.10706  | 5.77406   | -0.117291 | 0.0612232  | 0.807363  | 0.597145   |
| CADPS2    | 3.33573  | 3.5692    | 4.05249   | 4.11637    | 4.93073   | 5.23506    |
| CALB2     | 2.3371   | 2.66902   | 2.19588   | 2.75536    | -6.64581  | ?          |
| CALCOCO1  | 4.1195   | 3.90675   | 4.42657   | 4.51047    | 3.6762    | 3.28197    |
| CALCOCO2  | 5.14247  | 5.28785   | 5.63345   | 6.12328    | 4.97313   | 5.07791    |
| CALCRL    | -1.94365 | -1.93875  | -0.568612 | -1.46458   | 3.80932   | 4.95684    |
| CALD1     | 7.63825  | 7.63766   | 7.50737   | 7.66348    | 7.78583   | 7.37823    |
| CALHM2    | 1.58272  | 1.77411   | 0.0620664 | 0.306414   | 0.0279042 | -0.433286  |
| CALM1     | 6.9194   | 7.23064   | 5.3203    | 5.99608    | 6.74999   | 7.22198    |
| CALM2     | 7.8601   | 8.0046    | 7.33585   | 7.98977    | 8.36177   | 9.00809    |
| CALM2P2   | 4.91285  | 5.00878   | 4.40252   | 4.99413    | 5.4133    | 6.06135    |
| CALM2P3   | 3.02156  | 3.10456   | 2.35132   | 3.13685    | 3.64281   | 4.45399    |
| CALM3     | 5.71397  | 5.31357   | 5.73794   | 5.89504    | 6.52919   | 6.28623    |
| CALML4    | 1.878    | 1.64716   | 2.25476   | 2.22926    | 1.86665   | 0.872553   |
| CALR      | 9.25715  | 9.06507   | 9.17064   | 9.38335    | 9.14782   | 9.1546     |
| CALU      | 8.45483  | 8.12575   | 8.48681   | 8.7122     | 8.27834   | 7.97218    |
| CAMK1     | 1.89683  | 1.67157   | -0.500767 | 0.00222004 | 2.71049   | 2.85436    |
| CAMK1D    | ?        | -5.45651  | 1.89332   | 2.2086     | 1.47928   | 1.29333    |
| CAMK2D    | 4.99047  | 4.89799   | 3.77647   | 4.01012    | 6.11197   | 6.09741    |
| CAMK2G    | 3.94744  | 4.10482   | 4.24556   | 4.45197    | 4.58031   | 4.49651    |
| CAMK2N1   | 1.31777  | 1.53719   | 1.53076   | 2.15329    | -3.33694  | -3.12051   |
| CAMK4     | 5.5414   | 5.56987   | 2.49245   | 2.90241    | 4.441     | 4.71219    |

|            |           |           |           |           |           |          |
|------------|-----------|-----------|-----------|-----------|-----------|----------|
| CAMKK1     | 1.37242   | 1.40138   | 2.52039   | 2.9383    | 1.72342   | 1.71117  |
| CAMKK2     | 3.63854   | 3.43803   | 3.46573   | 3.54939   | 3.15988   | 2.65085  |
| CAMKMT     | 1.40948   | 1.3764    | 0.53081   | 0.761609  | 1.41119   | 1.28202  |
| CAMLG      | 3.84782   | 3.81792   | 4.11681   | 4.38002   | 4.08367   | 4.36206  |
| CAMSAP1    | 5.0453    | 5.06997   | 4.96112   | 5.17135   | 5.0904    | 4.81389  |
| CAMSAP2    | 6.29435   | 6.41883   | 6.00038   | 6.18146   | 6.43194   | 6.40994  |
| CAMTA1     | 3.44175   | 3.19715   | 2.4164    | 2.78297   | 3.96173   | 3.77911  |
| CAMTA2     | 2.4895    | 2.24685   | 2.27667   | 2.58571   | 2.68403   | 2.75273  |
| CAND1      | 7.38314   | 7.50434   | 6.59516   | 6.95609   | 6.72822   | 7.07074  |
| CAND2      | 1.17813   | 1.08399   | -0.699972 | -0.732879 | 0.0566806 | -0.44397 |
| CANT1      | 5.62764   | 5.59278   | 4.89262   | 5.07169   | 5.67089   | 5.64863  |
| CANX       | 9.20863   | 9.18681   | 9.80519   | 10.233    | 9.51188   | 9.51292  |
| CAP1       | 7.30979   | 7.54858   | 6.48503   | 7.15758   | 7.83758   | 8.40578  |
| CAP1P2     | 1.91386   | 2.49111   | 1.05418   | 1.86014   | 2.50136   | 2.73096  |
| CAP2       | 2.95018   | 2.8016    | 4.03926   | 4.29949   | 4.85685   | 4.51486  |
| CAPN1      | 4.33296   | 4.25311   | 4.58631   | 5.02173   | 3.62162   | 4.11346  |
| CAPN10     | 3.31765   | 3.00069   | 2.76362   | 2.8516    | 3.04011   | 2.78114  |
| CAPN10-AS1 | 2.34533   | 2.41675   | 1.53076   | 1.69856   | 1.62974   | 1.40185  |
| CAPN15     | 3.20781   | 2.96552   | 3.12936   | 3.16497   | 3.18361   | 3.19415  |
| CAPN2      | 7.10313   | 7.29329   | 6.8928    | 7.55925   | 7.58443   | 7.7016   |
| CAPN5      | 2.63408   | 2.62992   | 2.87177   | 3.081     | 1.18523   | 1.25912  |
| CAPN7      | 4.81513   | 4.95342   | 4.19584   | 4.56358   | 4.59884   | 5.00495  |
| CAPNS1     | 5.46079   | 5.59311   | 5.42057   | 5.94577   | 6.30236   | 6.5899   |
| CAPRIN1    | 7.31348   | 7.37989   | 7.22599   | 7.61204   | 8.15328   | 8.33891  |
| CAPRIN2    | 4.86458   | 5.07047   | 4.22692   | 4.33411   | 3.7277    | 4.1881   |
| CAPS       | 5.2376    | 4.55681   | 1.32645   | 1.17792   | 7.36695   | 8.19879  |
| CAPS2      | -2.9975   | -3.46127  | 2.77068   | 2.52781   | 1.73204   | 1.41227  |
| CAPZA1     | 6.6661    | 6.76308   | 6.46099   | 7.01137   | 7.18319   | 7.73842  |
| CAPZA2     | 5.59547   | 5.62202   | 5.49226   | 5.8824    | 6.16974   | 6.6768   |
| CAPZB      | 4.93345   | 4.70519   | 5.2511    | 5.35624   | 5.8532    | 5.72999  |
| CARD10     | 4.03223   | 4.48039   | 2.16079   | 2.39501   | 2.19769   | 2.18205  |
| CARD16     | -0.522356 | -0.485378 | 2.70615   | 2.31619   | -0.886822 | 0.620671 |
| CARD6      | 1.66727   | 1.66131   | 3.37872   | 3.76922   | 3.15668   | 3.78313  |
| CARD8      | 3.12469   | 3.43352   | 3.95052   | 4.10068   | 4.38154   | 4.25642  |
| CARF       | 1.04916   | 1.39404   | 1.72244   | 1.47715   | 1.79093   | 1.87074  |
| CARHSP1    | 4.95747   | 4.58946   | 5.23819   | 5.61493   | 4.21028   | 4.04215  |
| CARKD      | 3.83718   | 3.69285   | 3.94394   | 4.25169   | 3.94146   | 3.87448  |
| CARM1      | 3.4526    | 3.19156   | 3.02729   | 3.10201   | 4.34162   | 4.09551  |
| CARNMT1    | 3.69001   | 3.81676   | 3.21308   | 3.68234   | 3.71037   | 4.0178   |
| CARS       | 5.19177   | 5.15607   | 5.03732   | 5.53715   | 5.36519   | 5.34318  |
| CARS2      | 3.95763   | 3.96702   | 3.88434   | 4.43273   | 3.68925   | 4.04062  |
| CASC10     | 2.52734   | 2.50583   | 0.662041  | 0.350701  | 1.74911   | 1.51249  |
| CASC15     | -2.52833  | -3.29152  | -1.62185  | -2.08438  | 3.10917   | 2.5535   |
| CASC3      | 4.87123   | 4.94334   | 4.52468   | 4.7437    | 5.59296   | 5.37074  |
| CASC4      | 5.2822    | 5.60596   | 5.49375   | 5.96419   | 6.34182   | 6.53534  |
| CASC4P1    | -0.228704 | 0.455828  | -0.113776 | 0.876825  | 0.991427  | 1.08131  |
| CASC5      | 6.53719   | 6.64695   | 5.95762   | 6.13105   | 5.34426   | 5.81734  |
| CASD1      | 3.40026   | 3.49426   | 4.06322   | 4.15209   | 4.24206   | 4.54121  |
| CASK       | 3.51888   | 3.38108   | 4.02715   | 3.75226   | 4.15587   | 3.81489  |
| CASKIN2    | 1.78879   | 1.68694   | 2.15634   | 2.1904    | 2.09793   | 2.44305  |
| CASP1      | -1.85712  | -2.55512  | 4.34854   | 4.07021   | 0.826062  | 1.82236  |
| CASP2      | 4.09371   | 4.16194   | 3.91055   | 4.13672   | 4.30979   | 4.21958  |

|          |           |           |           |          |           |           |
|----------|-----------|-----------|-----------|----------|-----------|-----------|
| CASP3    | 4.12189   | 4.36846   | 3.95218   | 4.62334  | 4.12267   | 5.1372    |
| CASP4    | 2.39369   | 2.23066   | 5.48003   | 5.55517  | 4.11776   | 4.72478   |
| CASP6    | 2.08884   | 2.17017   | 2.14741   | 2.3424   | 2.55402   | 2.95863   |
| CASP7    | 2.66068   | 3.48844   | 3.51344   | 4.52193  | 3.46897   | 4.60615   |
| CASP8    | 4.17205   | 4.25397   | 4.25838   | 4.64104  | 3.15187   | 3.97803   |
| CASP8AP2 | 5.62908   | 5.57673   | 5.28156   | 5.331    | 5.65511   | 5.79162   |
| CASP9    | 1.58636   | 1.73686   | 1.07392   | 1.59857  | 2.45084   | 2.86694   |
| CAST     | 5.77786   | 5.77458   | 6.61085   | 6.93772  | 7.7926    | 7.61335   |
| CAT      | 4.20254   | 4.13985   | 4.04529   | 4.2553   | 5.21158   | 5.66505   |
| CATSPER2 | 1.69509   | 1.76334   | 0.907583  | 0.58426  | 1.4349    | 0.665011  |
| CAV1     | 5.66642   | 5.88644   | 7.44757   | 8.03121  | 7.39439   | 7.6417    |
| CAV2     | 3.0407    | 3.31688   | 3.14515   | 3.41669  | 4.98445   | 4.60729   |
| CBFA2T2  | 4.08882   | 3.8925    | 4.49507   | 4.5187   | 3.85144   | 3.18507   |
| CBFB     | 5.50793   | 5.67605   | 5.1305    | 5.379    | 6.43409   | 6.09094   |
| CBL      | 5.21005   | 5.22933   | 5.58631   | 5.8003   | 5.02968   | 4.98328   |
| CBLB     | 2.94838   | 2.77795   | 4.51691   | 4.62926  | 3.33828   | 3.40964   |
| CBLL1    | 4.26664   | 4.33663   | 3.80626   | 4.16391  | 4.16483   | 3.94612   |
| CBLN2    | -5.69162  | -5.45651  | 3.48535   | 1.38307  | -2.07475  | -3.38329  |
| CBR1     | 2.1491    | 2.2096    | 3.50821   | 3.80987  | 5.21461   | 5.58788   |
| CBR3     | 2.18749   | 2.15445   | 1.88256   | 3.00624  | 1.3569    | 2.11421   |
| CBR3-AS1 | 0.313664  | 0.330398  | 0.759693  | 1.24292  | -0.187967 | -0.992021 |
| CBR4     | 3.73438   | 3.82645   | 3.69621   | 3.64553  | 3.56621   | 3.44918   |
| CBS      | 2.4918    | 1.21383   | 3.95813   | 4.07803  | 1.24335   | 0.222359  |
| CBSL     | -1.81208  | -0.207105 | 1.74342   | 1.47916  | 2.68298   | 2.25952   |
| CBWD1    | 4.17326   | 4.17512   | 4.04533   | 4.09662  | 4.79696   | 4.79024   |
| CBWD2    | 3.73689   | 3.75981   | 3.51989   | 3.71275  | 4.52175   | 4.60622   |
| CBWD3    | 3.60739   | 3.70306   | 3.16084   | 3.09431  | 4.13694   | 4.01086   |
| CBWD5    | 4.61749   | 4.58372   | 3.9429    | 4.09531  | 5.1982    | 5.1449    |
| CBWD7    | 3.62002   | 3.42498   | 3.26857   | 3.50415  | 4.11269   | 3.88868   |
| CBX1     | 5.8121    | 5.86825   | 5.29518   | 5.63445  | 5.71535   | 5.74666   |
| CBX2     | 4.70339   | 4.68308   | 4.74277   | 4.87202  | 2.82351   | 2.85935   |
| CBX3     | 6.98596   | 6.97075   | 6.57278   | 6.93164  | 6.94178   | 7.33038   |
| CBX3P9   | 4.35705   | 4.36745   | 3.90142   | 4.2591   | 4.20402   | 4.75863   |
| CBX4     | 3.15423   | 3.09749   | 3.28      | 3.72089  | 2.83555   | 2.74862   |
| CBX5     | 7.74502   | 7.85335   | 7.81657   | 8.06188  | 7.45413   | 7.3679    |
| CBX6     | 5.94367   | 5.65217   | 5.70065   | 5.62291  | 5.38848   | 5.27984   |
| CBX7     | 1.94052   | 2.23095   | 2.12145   | 2.3344   | 1.53456   | 1.57322   |
| CBX8     | 3.14013   | 3.00069   | 2.07389   | 2.37903  | 2.20698   | 2.38076   |
| CBY1     | 2.29262   | 2.10886   | 2.57484   | 2.51973  | 1.82932   | 1.37621   |
| CC2D1A   | 2.56772   | 2.317     | 2.45311   | 2.69531  | 3.68706   | 3.61295   |
| CC2D1B   | 4.81101   | 4.69897   | 5.20354   | 5.44598  | 5.2462    | 5.39633   |
| CC2D2A   | 3.71454   | 3.74294   | 2.95347   | 3.05608  | 3.71147   | 3.95684   |
| CCAR1    | 5.72247   | 5.56962   | 5.38085   | 5.49524  | 5.95348   | 5.63702   |
| CCAR2    | 6.05246   | 6.04647   | 5.62969   | 5.75502  | 6.05611   | 6.00136   |
| CCBL1    | 1.63634   | 1.41371   | 1.98141   | 2.03075  | 2.01567   | 2.08772   |
| CCBL2    | 3.44599   | 3.34355   | 2.96796   | 3.2862   | 4.10434   | 4.90689   |
| CCDC101  | 1.20436   | 1.35049   | 1.35017   | 1.80516  | 1.01342   | 1.31612   |
| CCDC102A | 0.377835  | 0.419895  | 0.584741  | 1.07114  | 0.86332   | 1.20023   |
| CCDC102B | -0.744656 | -0.655276 | 3.44947   | 3.09575  | 3.47668   | 4.18051   |
| CCDC103  | 0.159474  | -0.101954 | -0.012717 | 0.454639 | 2.01164   | 2.4161    |
| CCDC106  | 2.14956   | 1.72206   | 1.01621   | 0.95732  | 2.97631   | 3.11027   |
| CCDC107  | 0.72396   | 0.874844  | 0.219686  | 0.517235 | 2.62746   | 2.38337   |

|           |            |             |          |           |          |             |
|-----------|------------|-------------|----------|-----------|----------|-------------|
| CCDC109B  | 2.88964    | 3.13335     | 1.13845  | 1.32585   | 3.42184  | 3.73623     |
| CCDC112   | 2.22575    | 2.49427     | 1.75902  | 2.53504   | 2.0879   | 2.83245     |
| CCDC113   | -1.11382   | -1.50825    | 1.67449  | 1.7698    | 2.5637   | 2.52691     |
| CCDC115   | 2.73309    | 2.83408     | 2.24695  | 2.68885   | 2.77603  | 3.48064     |
| CCDC117   | 4.80476    | 4.76116     | 4.74348  | 4.95928   | 4.53815  | 4.4005      |
| CCDC12    | 3.14484    | 3.01896     | 2.32429  | 2.60199   | 3.25855  | 2.98329     |
| CCDC121   | 1.11847    | 1.34106     | 0.631421 | 0.646135  | 1.50869  | 1.73501     |
| CCDC122   | 1.00142    | 1.11463     | 0.259532 | 0.248838  | -2.07475 | -2.38405    |
| CCDC124   | 2.49815    | 2.27864     | 2.26358  | 2.41082   | 3.13736  | 3.17593     |
| CCDC125   | 2.97135    | 2.98501     | 1.96975  | 1.93553   | 3.46341  | 3.58437     |
| CCDC126   | 2.04241    | 2.11082     | 1.98141  | 2.28351   | 2.41117  | 2.87072     |
| CCDC127   | 3.79844    | 3.77675     | 4.37298  | 4.46061   | 3.72648  | 3.48558     |
| CCDC129   | -0.341358  | -0.354149 ? |          | -5.10387  | 2.44561  | 1.5971      |
| CCDC130   | 2.28962    | 2.23761     | 2.4164   | 2.41866   | 3.14221  | 2.919       |
| CCDC134   | 2.11151    | 1.88148     | 2.84991  | 3.00752   | 1.59711  | 1.23585     |
| CCDC136   | 2.85743    | 2.99248     | 3.42011  | 3.44      | 2.51961  | 2.15129     |
| CCDC137   | 4.62708    | 4.1582      | 3.57219  | 3.85983   | 4.89721  | 4.63413     |
| CCDC138   | 3.37372    | 3.49571     | 2.39014  | 2.36692   | 3.17574  | 3.76699     |
| CCDC14    | 6.15267    | 6.2069      | 6.64403  | 6.69227   | 5.88657  | 5.81585     |
| CCDC142   | 3.01913    | 2.85458     | 2.65254  | 2.61911   | 2.77852  | 2.23109     |
| CCDC144A  | -4.69535   | -7.41563    | 1.97872  | 1.82408   | 3.64474  | 3.46781     |
| CCDC144B  | ?          | -4.63312    | 5.15115  | 4.8764    | 3.03189  | 2.6401      |
| CCDC144CP | -5.69162   | -6.45019    | 3.03077  | 2.91153   | 4.90539  | 5.04952     |
| CCDC146   | 0.309141   | 0.50228     | -0.06726 | 0.0199296 | 1.37528  | 1.23384     |
| CCDC149   | 2.63632    | 2.27526     | 1.20884  | 1.43811   | 2.07103  | 2.0415      |
| CCDC15    | 3.14955    | 3.31687     | 3.0308   | 2.94103   | 2.30838  | 2.06149     |
| CCDC150   | 3.65485    | 3.76616     | 2.92027  | 2.84538   | 3.08643  | 2.6198      |
| CCDC150P1 | 1.34536    | 1.2583      | 0.793829 | 0.82198   | 0.499649 | 0.126299    |
| CCDC157   | 1.27183    | 0.875473    | 0.95255  | 1.19118   | 0.539491 | 0.294147    |
| CCDC159   | -0.654465  | -0.971108   | 0.528091 | 0.622171  | 0.24535  | 0.164516    |
| CCDC163P  | ?          | -4.13839    | 1.71737  | 1.94105   | 0.489522 | -0.00614162 |
| CCDC167   | 1.77262    | 1.76119     | 1.38638  | 1.69211   | 2.94518  | 3.40964     |
| CCDC17    | 0.183671   | -0.177294   | 0.904002 | 0.946514  | 0.282309 | -1.24695    |
| CCDC171   | 2.29812    | 2.65611     | 1.17408  | 1.24877   | 1.3621   | 1.70271     |
| CCDC174   | 3.22425    | 3.29371     | 2.79662  | 2.83954   | 3.3909   | 3.44049     |
| CCDC18    | 4.22913    | 4.33969     | 4.53942  | 4.78469   | 4.00709  | 4.20735     |
| CCDC181   | 2.80475    | 3.0068      | -2.01303 | -2.64851  | 1.41654  | 2.15749     |
| CCDC186   | 3.73867    | 3.68817     | 4.68142  | 4.69368   | 4.69668  | 4.72687     |
| CCDC22    | 1.48086    | 1.66131     | 1.25116  | 1.76772   | 1.29393  | 1.90064     |
| CCDC24    | 0.988768   | 0.932341    | 1.93392  | 2.24549   | 0.340015 | 0.541297    |
| CCDC25    | 4.68246    | 4.69564     | 3.90363  | 4.30007   | 4.63523  | 5.21437     |
| CCDC28A   | 2.10722    | 1.73686     | 1.61093  | 1.61231   | 3.25163  | 3.37224     |
| CCDC28B   | 2.45828    | 2.5133      | 2.19587  | 2.42257   | 2.79297  | 3.59479     |
| CCDC34    | 2.74801    | 2.72204     | 3.16078  | 3.2288    | 3.171    | 2.7609      |
| CCDC39    | 1.00142    | 1.06077     | 0.25958  | 0.350701  | 1.7534   | 0.022034    |
| CCDC40    | -0.0407343 | -0.23387    | 1.93025  | 1.93012   | 0.740643 | 0.200291    |
| CCDC43    | 3.928      | 4.12956     | 3.99095  | 4.50508   | 4.71566  | 5.01705     |
| CCDC47    | 6.57237    | 6.52033     | 6.45444  | 6.64959   | 7.72043  | 7.4096      |
| CCDC50    | 5.99701    | 5.95711     | 6.07032  | 6.34752   | 6.79534  | 7.01775     |
| CCDC51    | 3.39897    | 3.3169      | 2.28817  | 2.64941   | 3.1899   | 3.51488     |
| CCDC53    | 2.7418     | 2.99447     | 2.25944  | 2.8337    | 2.16626  | 2.94434     |
| CCDC57    | 4.88685    | 4.73954     | 3.95656  | 3.85294   | 4.49127  | 4.13741     |

|          |           |           |           |           |           |            |
|----------|-----------|-----------|-----------|-----------|-----------|------------|
| CCDC58   | 2.62302   | 2.75745   | 2.1293    | 2.38951   | 2.86652   | 3.34381    |
| CCDC58P3 | 0.314905  | 0.365189  | -0.335055 | -0.472383 | 0.0970309 | 0.731505   |
| CCDC59   | 3.84185   | 3.88459   | 3.10597   | 3.41804   | 3.72659   | 4.06098    |
| CCDC6    | 5.07075   | 5.17694   | 4.52985   | 4.96396   | 5.47282   | 5.86265    |
| CCDC61   | 0.0954519 | -0.177293 | 0.120378  | 0.476226  | 0.384182  | 0.359476   |
| CCDC65   | -0.489437 | -0.418273 | 0.723445  | 0.646135  | -0.250761 | -0.752286  |
| CCDC66   | 4.27213   | 4.3446    | 3.89101   | 4.00615   | 3.98997   | 4.01977    |
| CCDC69   | -0.509064 | -0.790185 | 3.90924   | 4.15325   | -5.65305  | -4.70296   |
| CCDC7    | 1.08701   | 1.60583   | 1.51514   | 1.66454   | 1.09188   | 2.0303     |
| CCDC71   | 3.07076   | 2.82718   | 2.92501   | 2.91077   | 2.99254   | 2.96925    |
| CCDC71L  | 3.44302   | 3.03301   | 3.2088    | 3.98392   | 1.11453   | 0.816919   |
| CCDC73   | 0.995709  | 1.40502   | 0.627915  | 1.17375   | 2.26226   | 2.79373    |
| CCDC77   | 4.39671   | 4.43216   | 3.87348   | 4.08565   | 2.821     | 3.25275    |
| CCDC78   | 0.539412  | 0.432061  | 0.488988  | 0.383121  | 0.147163  | -0.0627204 |
| CCDC80   | 2.42764   | 1.94232   | 6.81788   | 6.82908   | 5.33896   | 5.8773     |
| CCDC82   | 3.44302   | 3.50726   | 4.67833   | 4.83001   | 4.33192   | 4.22992    |
| CCDC84   | 3.00656   | 2.93804   | 3.89556   | 4.10184   | 3.46381   | 2.68156    |
| CCDC85B  | 3.05414   | 2.88589   | 1.69915   | 2.27489   | 1.57335   | 1.96574    |
| CCDC85C  | 3.98144   | 3.94237   | 3.74546   | 3.73079   | 3.84402   | 3.28999    |
| CCDC86   | 4.18186   | 3.97553   | 3.80216   | 4.28004   | 3.91667   | 3.91158    |
| CCDC88A  | 6.74232   | 6.61686   | 7.24834   | 7.45593   | 6.61166   | 6.46275    |
| CCDC88B  | 0.0824028 | -0.214764 | 0.0645242 | -0.108685 | 0.0540566 | 1.37015    |
| CCDC88C  | 1.01255   | 1.09766   | 1.89348   | 1.71206   | 1.49547   | 1.42749    |
| CCDC89   | -5.69162  | -4.45968  | 0.986462  | 1.22214   | -0.121008 | 0.0213376  |
| CCDC9    | 1.48086   | 1.59247   | 1.78805   | 1.90242   | 1.62049   | 1.2122     |
| CCDC90B  | 3.52074   | 3.59753   | 3.80939   | 4.10305   | 3.88905   | 4.53784    |
| CCDC91   | 3.59015   | 3.59925   | 2.75511   | 2.93081   | 2.61549   | 2.86623    |
| CCDC92   | 2.77228   | 2.7333    | 2.4585    | 2.36048   | 1.93913   | 1.46325    |
| CCDC93   | 4.92617   | 5.05034   | 4.54439   | 4.7677    | 5.33155   | 5.03474    |
| CCDC94   | 1.75628   | 1.92519   | 0.956094  | 1.30061   | 2.04707   | 2.24167    |
| CCDC97   | 2.60699   | 2.51445   | 2.65254   | 2.45724   | 3.00503   | 2.76903    |
| CCHCR1   | 2.68463   | 2.64569   | 3.33808   | 3.65935   | 3.02969   | 2.97277    |
| CCL2     | 9.20652   | 9.02374   | 5.24324   | 5.96829   | 3.5171    | 4.123      |
| CCM2     | 3.74179   | 3.60054   | 3.78514   | 3.86415   | 4.112     | 3.7991     |
| CCNA2    | 5.74195   | 5.90235   | 4.97564   | 5.39332   | 5.7972    | 6.08264    |
| CCNB1    | 6.26954   | 6.32218   | 6.02561   | 6.50724   | 6.65358   | 7.12595    |
| CCNB1IP1 | 3.90732   | 3.66772   | 2.68377   | 2.92185   | 3.91806   | 4.35127    |
| CCNB2    | 4.99977   | 4.90214   | 4.21413   | 4.5085    | 4.95155   | 5.062      |
| CCNB2P1  | 0.203978  | 0.4728    | 0.138526  | 0.19779   | 0.680981  | 0.0579424  |
| CCNB3    | 1.42508   | 1.12217   | -0.825729 | -0.938639 | -3.85089  | -2.24661   |
| CCNC     | 4.74208   | 4.76356   | 4.62717   | 4.86042   | 5.64062   | 6.12746    |
| CCND1    | 7.79961   | 8.22408   | 6.02653   | 6.63514   | 5.92314   | 5.50999    |
| CCND3    | 3.5429    | 3.51157   | 4.7743    | 5.2465    | 5.16465   | 5.23138    |
| CCNDBP1  | 3.45574   | 3.27376   | 2.87837   | 3.38102   | 3.61987   | 3.99718    |
| CCNE1    | 2.49323   | 2.40753   | 2.79663   | 2.85407   | 2.17576   | 2.19417    |
| CCNE2    | 3.07316   | 3.05302   | 2.94012   | 3.12012   | 3.53648   | 4.00112    |
| CCNF     | 4.952     | 5.02749   | 4.84132   | 4.87413   | 4.46865   | 4.15718    |
| CCNG1    | 5.80646   | 5.54698   | 5.90491   | 6.03932   | 6.447     | 6.5251     |
| CCNG2    | 3.10021   | 3.04693   | 3.00383   | 3.00231   | 3.13897   | 2.69844    |
| CCNH     | 4.74381   | 4.90453   | 5.01101   | 5.22385   | 5.25497   | 5.83782    |
| CCNI     | 5.96025   | 5.87199   | 5.58918   | 5.77228   | 5.92066   | 6.06848    |
| CCNJ     | 2.91008   | 3.06654   | 2.80517   | 2.97864   | 3.44423   | 3.40964    |

|          |          |          |          |           |            |          |
|----------|----------|----------|----------|-----------|------------|----------|
| CCNJL    | 3.48455  | 3.60459  | 4.20448  | 4.03838   | 3.86717    | 3.50518  |
| CCNK     | 3.1566   | 3.05276  | 2.64612  | 2.74123   | 2.63792    | 2.83645  |
| CCNL1    | 6.21866  | 6.00373  | 6.51561  | 6.49478   | 6.36031    | 6.01181  |
| CCNL2    | 5.9731   | 5.78418  | 6.31231  | 6.18433   | 6.84872    | 6.16596  |
| CCNT1    | 6.47348  | 6.45892  | 5.73424  | 5.93352   | 5.69283    | 5.7069   |
| CCNT2    | 5.26522  | 5.28357  | 5.22783  | 5.28564   | 5.30907    | 5.36377  |
| CCNY     | 4.60585  | 4.71894  | 4.03564  | 4.38702   | 5.12103    | 5.06972  |
| CCNYL1   | 2.97563  | 2.81548  | 2.63344  | 2.83155   | 2.93912    | 2.98268  |
| CCP110   | 4.60241  | 4.72699  | 4.89528  | 5.05293   | 4.70436    | 4.7331   |
| CCPG1    | 5.2779   | 5.36812  | 5.70911  | 6.24599   | 6.07047    | 6.31662  |
| CCS      | 2.43254  | 2.24798  | 2.89597  | 2.95187   | 2.06426    | 1.63317  |
| CCSAP    | 4.68612  | 4.97425  | 4.11449  | 4.57937   | 4.79069    | 4.60939  |
| CCSER2   | 5.2346   | 5.23324  | 4.9643   | 5.1067    | 5.78418    | 5.69256  |
| CCT2     | 7.29704  | 7.35266  | 6.02226  | 6.43684   | 7.01233    | 7.78099  |
| CCT3     | 7.82439  | 7.83295  | 6.69374  | 7.23159   | 7.55085    | 7.91255  |
| CCT4     | 6.56561  | 6.76449  | 5.96639  | 6.45972   | 6.75276    | 7.40602  |
| CCT5     | 8.16936  | 8.16392  | 7.55732  | 7.97027   | 8.41629    | 8.52689  |
| CCT5P1   | 2.14851  | 2.2928   | 1.56445  | 2.17407   | 2.46429    | 2.21763  |
| CCT5P2   | 2.62223  | 2.90362  | 2.07752  | 2.64469   | 3.09817    | 2.71352  |
| CCT6A    | 7.69697  | 7.72578  | 6.77086  | 7.27569   | 7.67823    | 8.11379  |
| CCT6P1   | 0.679523 | 0.792506 | 0.544634 | 0.888897  | 1.10568    | 0.806159 |
| CCT6P2   | 3.20408  | 3.35814  | 2.40089  | 2.85598   | 3.25048    | 3.25175  |
| CCT6P3   | 2.08124  | 2.2003   | 2.01611  | 2.20544   | 2.10913    | 1.57614  |
| CCT7     | 7.13402  | 7.10626  | 6.47777  | 6.9466    | 7.2169     | 7.48562  |
| CCT7P1   | 0.529821 | 0.920918 | 0.259532 | 0.82198   | 0.901996   | 0.597145 |
| CCT8     | 6.36338  | 6.41994  | 6.53747  | 7.00474   | 6.47011    | 6.89483  |
| CCT8P1   | 3.67624  | 3.96031  | 3.97419  | 4.46408   | 3.94405    | 4.31812  |
| CCZ1     | 4.88907  | 5.01016  | 4.68242  | 5.04278   | 5.18292    | 5.75326  |
| CCZ1B    | 3.4721   | 3.59018  | 3.77409  | 3.88752   | 4.72782    | 5.06432  |
| CD109    | 8.11235  | 8.2718   | 5.35102  | 5.9251    | 5.99577    | 6.48762  |
| CD151    | 6.9457   | 6.82631  | 6.59138  | 6.8315    | 6.16618    | 6.27013  |
| CD160    | 0.907844 | 1.03007  | 1.33228  | 1.25169   | 1.49746    | 0.445102 |
| CD163L1  | 2.25222  | 1.68694  | 2.83885  | 3.20632 ? | ?          |          |
| CD164    | 6.62611  | 6.71703  | 6.13811  | 6.44884   | 7.33714    | 7.45013  |
| CD1D     | 0.735617 | 0.407614 | 1.57806  | 1.96266   | -5.65305   | -5.69922 |
| CD22     | 4.44047  | 4.43952  | 0.662041 | 1.64609   | -5.65305 ? |          |
| CD24     | -5.10914 | -4.87366 | 3.33583  | 3.99963   | -2.65941   | -2.70579 |
| CD27-AS1 | 2.07419  | 2.3665   | 2.77242  | 3.01624   | 1.30581    | 1.21477  |
| CD274    | 0.586404 | 1.04501  | 0.431281 | 1.30907   | 3.58166    | 3.85743  |
| CD276    | 5.80796  | 5.27566  | 5.40613  | 5.22095   | 5.48655    | 4.90615  |
| CD2AP    | 5.17359  | 5.21398  | 4.68297  | 4.85839   | 5.30149    | 4.91075  |
| CD2BP2   | 5.26739  | 5.23714  | 5.05426  | 5.35521   | 5.53691    | 5.82759  |
| CD302    | 4.31948  | 4.37413  | 4.20119  | 4.20394   | 3.34643    | 3.51924  |
| CD320    | 4.77512  | 4.56987  | 3.40144  | 3.53684   | 4.79962    | 5.37343  |
| CD33     | 0.388476 | 0.537236 | 2.50649  | 2.78296 ? | ?          |          |
| CD34     | -5.69162 | -4.13839 | 0.355738 | 0.563685  | 3.26747    | 3.35127  |
| CD37     | -2.1135  | -2.76144 | 1.49854  | 1.57059   | -2.65941   | -3.12051 |
| CD3EAP   | 3.75198  | 3.853    | 1.90115  | 2.38352   | 4.1151     | 3.71696  |
| CD44     | 8.24621  | 8.36291  | 9.27992  | 9.60582   | 9.15742    | 9.67677  |
| CD46     | 6.45273  | 6.16171  | 7.01444  | 6.90082   | 6.69186    | 6.3024   |
| CD47     | 5.37875  | 5.74566  | 6.32649  | 6.7175    | 4.66611    | 5.00064  |
| CD55     | 4.37171  | 4.80977  | 3.1065   | 3.95322   | 0.799187   | 2.06809  |



|          |           |            |           |           |            |           |
|----------|-----------|------------|-----------|-----------|------------|-----------|
| CD58     | 3.49075   | 3.59108    | 1.99641   | 2.53864   | 4.90904    | 5.8055    |
| CD59     | 8.91664   | 8.998      | 6.60808   | 7.08778   | 7.2596     | 7.48031   |
| CD63     | 7.01388   | 6.96132    | 6.98655   | 7.40652   | 6.58374    | 7.27091   |
| CD68     | -0.2393   | -0.260205  | 1.48438   | 2.90684   | -1.59257   | 0.0442542 |
| CD70     | 3.25803   | 3.42285    | 1.11115   | 1.85698   | 5.83355    | 6.49845   |
| CD74     | 8.51607   | 8.03338    | 0.711372  | 0.798133  | -1.75295   | -3.12051  |
| CD81     | 5.87859   | 5.85201    | 5.938     | 6.07604   | 5.26004    | 5.32325   |
| CD82     | -0.413499 | -0.440295  | 3.74104   | 4.73944   | 1.50464    | 2.41713   |
| CD83     | 4.03902   | 4.01388    | -0.861345 | -0.380732 | 2.49957    | 2.43796   |
| CD9      | 3.70073   | 3.73805    | 4.72861   | 5.04027   | 4.19921    | 4.50639   |
| CD96     | 4.74954   | 4.63517    | 0.138526  | 0.300663  | -3.48878   | -5.69922  |
| CD99     | 4.75883   | 4.73128    | 5.88493   | 6.13076   | 3.90383    | 4.0041    |
| CD99L2   | 4.62567   | 4.56575    | 5.25008   | 5.42835   | 4.63485    | 4.74657   |
| CD99P1   | -0.159773 | -0.0876659 | 1.42385   | 1.27492   | -0.0903144 | -1.06257  |
| CDADC1   | 1.00834   | 1.36375    | 1.25947   | 1.45345   | 1.05399    | 1.35942   |
| CDAN1    | 3.27802   | 3.24697    | 3.03563   | 3.11724   | 3.36678    | 3.01781   |
| CDC123   | 5.12668   | 5.16367    | 3.72384   | 4.20346   | 5.07136    | 5.53297   |
| CDC14A   | 1.7732    | 2.11552    | 2.16056   | 2.27482   | 1.11161    | 1.01646   |
| CDC14B   | 3.95128   | 3.4881     | 4.05672   | 4.14427   | 3.26369    | 2.52726   |
| CDC14C   | 0.298541  | 0.181052   | 0.11422   | 0.406232  | -0.316647  | -1.0774   |
| CDC16    | 3.81366   | 3.80978    | 4.10533   | 4.28026   | 4.16623    | 4.31288   |
| CDC20    | 5.8705    | 5.80046    | 5.3937    | 5.96572   | 5.5046     | 5.65329   |
| CDC20P1  | 2.693     | 2.83152    | 3.25193   | 3.73464   | 3.1518     | 3.19582   |
| CDC23    | 5.16277   | 5.12821    | 5.09375   | 5.43323   | 5.1438     | 5.28338   |
| CDC25A   | 5.18924   | 5.34492    | 3.99515   | 4.47047   | 4.78417    | 4.72582   |
| CDC25B   | 5.05664   | 4.79808    | 6.03926   | 6.31666   | 4.69283    | 4.81879   |
| CDC25C   | 3.17756   | 3.06869    | 3.17628   | 3.80858   | 2.55645    | 3.27057   |
| CDC26    | 1.98187   | 1.86066    | 1.5909    | 1.91273   | 2.3678     | 3.54353   |
| CDC27    | 6.687     | 6.776      | 6.19684   | 6.61509   | 6.57783    | 6.82526   |
| CDC34    | 3.48207   | 3.21135    | 2.87447   | 3.1055    | 4.87155    | 4.35532   |
| CDC37    | 5.95389   | 5.90536    | 4.89946   | 5.25717   | 6.55583    | 6.44536   |
| CDC37L1  | 3.10344   | 3.18641    | 2.79662   | 2.9052    | 4.84351    | 5.56649   |
| CDC40    | 4.26742   | 4.24279    | 4.04649   | 4.24652   | 5.28803    | 5.6915    |
| CDC42    | 6.53503   | 6.61022    | 6.29563   | 6.67697   | 7.52597    | 7.73124   |
| CDC42BPA | 6.1432    | 6.15022    | 6.3218    | 6.45912   | 6.69584    | 6.79362   |
| CDC42BPB | 5.25018   | 5.22008    | 4.67124   | 4.72624   | 5.61717    | 5.48188   |
| CDC42EP1 | 3.19877   | 2.92948    | 2.77938   | 3.10792   | 4.40577    | 4.5856    |
| CDC42EP2 | 2.55124   | 2.85683    | 2.35952   | 2.57067   | -0.168308  | -0.214706 |
| CDC42EP3 | 5.71243   | 6.12826    | 6.46371   | 6.90469   | 6.55207    | 6.47412   |
| CDC42EP4 | 4.08964   | 4.18731    | 4.6198    | 5.08838   | 4.70487    | 5.05151   |
| CDC42P6  | 4.18391   | 4.21436    | 3.86411   | 4.32212   | 4.97479    | 5.43681   |
| CDC42SE1 | 6.64012   | 6.51857    | 5.65527   | 5.95957   | 6.2766     | 6.37198   |
| CDC42SE2 | 4.61606   | 4.60927    | 4.76338   | 5.05419   | 5.11899    | 5.14894   |
| CDC45    | 4.76341   | 4.85117    | 4.18715   | 4.43614   | 3.13248    | 3.36743   |
| CDC5L    | 5.52732   | 5.66932    | 5.1513    | 5.39797   | 5.79808    | 6.22475   |
| CDC6     | 5.66587   | 5.68403    | 5.42194   | 5.79165   | 5.47475    | 5.31356   |
| CDC7     | 4.66502   | 4.75572    | 4.00876   | 4.12359   | 3.05394    | 3.3992    |
| CDC73    | 5.27497   | 5.2219     | 4.83397   | 4.92802   | 5.23336    | 5.13642   |
| CDCA2    | 5.44908   | 5.45488    | 4.95857   | 5.25638   | 4.90382    | 5.09821   |
| CDCA3    | 4.49392   | 4.36412    | 4.2       | 4.3956    | 3.69714    | 3.62101   |
| CDCA4    | 5.19573   | 5.24969    | 2.99141   | 3.21085   | 4.47605    | 4.69095   |
| CDCA5    | 5.5237    | 5.54733    | 4.32823   | 4.68233   | 4.58761    | 4.48557   |

|            |           |           |            |            |           |          |
|------------|-----------|-----------|------------|------------|-----------|----------|
| CDCA7      | 4.8807    | 4.87421   | 5.54737    | 5.44094    | 3.87204   | 3.73207  |
| CDCA7L     | 4.90351   | 4.87395   | 5.06943    | 5.28751    | 5.34458   | 5.12981  |
| CDCA8      | 4.76648   | 4.90675   | 4.01124    | 4.52416    | 4.74588   | 4.78315  |
| CDH11      | 5.90572   | 5.40656   | 7.07914    | 7.12925    | 7.56674   | 7.29522  |
| CDH13      | 6.59167   | 6.73348   | 4.96048    | 5.1632     | 4.65482   | 4.91075  |
| CDH18      | 3.89056   | 3.96446   | -6.17309   | -6.09892 ? |           | -4.70296 |
| CDH19      | 6.52336   | 6.63717   | -6.17309   | -3.78492   | -6.64581  | -5.69922 |
| CDH2       | 7.10849   | 7.2224    | 5.40877    | 5.69434    | 6.61614   | 6.64608  |
| CDH24      | 1.77262   | 1.67674   | 1.74725    | 1.97335    | 2.19458   | 2.21217  |
| CDH4       | -3.37567  | -6.45019  | -0.117291  | -0.52367   | 5.88081   | 5.38602  |
| CDH6       | -0.816197 | -1.14061  | 7.16007    | 6.90293    | 6.39868   | 6.3191   |
| CDHR3      | 1.60474   | 1.89912   | -0.0541032 | 0.0410467  | 0.815493  | 0.359476 |
| CDIP1      | 1.40425   | 1.2583    | 2.62384    | 2.9301     | -0.551587 | -1.53638 |
| CDIPT      | 4.31126   | 4.11538   | 3.85265    | 4.09818    | 3.71037   | 3.96217  |
| CDK1       | 5.64103   | 5.72851   | 5.67949    | 5.8663     | 6.19821   | 6.8402   |
| CDK10      | 3.72509   | 3.46345   | 3.60438    | 3.60884    | 3.69614   | 2.99026  |
| CDK11A     | 2.39338   | 2.06495   | 2.46269    | 2.70302    | 2.84755   | 2.45177  |
| CDK11B     | 3.54626   | 3.45055   | 3.05159    | 3.36146    | 4.08462   | 3.86916  |
| CDK12      | 5.94477   | 5.85059   | 6.25293    | 6.29683    | 6.30746   | 6.05441  |
| CDK13      | 5.71582   | 5.72573   | 5.70026    | 5.86774    | 5.80396   | 5.74346  |
| CDK14      | 4.76851   | 4.58494   | -0.455418  | -0.589346  | 4.75329   | 4.92446  |
| CDK16      | 5.95486   | 5.72108   | 4.997      | 5.21984    | 4.76069   | 4.51969  |
| CDK17      | 4.32398   | 4.39591   | 4.28203    | 4.35775    | 3.89139   | 4.03643  |
| CDK18      | 1.31777   | 0.988427  | 2.24695    | 2.15798    | -2.07475  | -2.24661 |
| CDK19      | 3.84782   | 3.83864   | 3.693      | 3.9052     | 4.09457   | 4.07792  |
| CDK2       | 5.48329   | 5.46677   | 4.80657    | 5.17484    | 5.00634   | 5.07873  |
| CDK20      | 0.987481  | 0.859151  | 1.496      | 1.31748    | 1.86328   | 1.93717  |
| CDK2AP1    | 6.54761   | 6.44443   | 4.94291    | 5.31624    | 6.28389   | 6.03875  |
| CDK2AP2    | 2.80674   | 2.57059   | 2.76777    | 3.081      | 2.54427   | 2.52692  |
| CDK3       | 0.367483  | 0.0963023 | 0.332026   | 0.330708   | 0.734161  | 0.590233 |
| CDK4       | 5.5538    | 5.52961   | 5.38001    | 5.73736    | 5.71872   | 6.12957  |
| CDK5       | 3.40692   | 3.18735   | 2.78772    | 3.26759    | 3.67894   | 4.18945  |
| CDK5R1     | 2.24345   | 2.15188   | 0.138526   | 0.266325   | 1.12765   | 0.785207 |
| CDK5RAP1   | 4.6251    | 4.71706   | 4.21415    | 4.5296     | 4.02268   | 3.71324  |
| CDK5RAP2   | 5.78119   | 5.88117   | 5.59125    | 5.70535    | 5.17021   | 4.74449  |
| CDK5RAP3   | 5.17868   | 5.03231   | 4.89379    | 5.0795     | 5.42905   | 4.97917  |
| CDK6       | 7.8283    | 7.9228    | 7.13389    | 7.5163     | 7.38127   | 7.19829  |
| CDK7       | 3.00991   | 3.20072   | 2.70021    | 3.29153    | 3.64612   | 4.11665  |
| CDK8       | 3.4603    | 3.45066   | 3.72154    | 3.91962    | 3.14182   | 3.11984  |
| CDK9       | 3.58517   | 3.42437   | 3.85813    | 4.06485    | 3.67284   | 3.63313  |
| CDKAL1     | 3.70712   | 3.87365   | 3.45854    | 3.69368    | 4.01121   | 4.29328  |
| CDKL1      | 0.645766  | 1.16365   | -0.635609  | 0.0877344  | 0.587307  | 1.02465  |
| CDKL5      | 2.78877   | 2.69955   | 1.95093    | 1.90801    | 3.80423   | 3.27342  |
| CDKN1A     | 3.92572   | 4.1998    | 2.97384    | 3.46293    | 2.59237   | 2.69418  |
| CDKN1B     | 4.65462   | 4.6818    | 4.70446    | 4.89257    | 4.99521   | 5.21957  |
| CDKN2AIP   | 3.2405    | 3.33319   | 3.13163    | 3.4948     | 3.46511   | 3.96039  |
| CDKN2AIPNL | 3.94206   | 3.86358   | 3.59783    | 4.08346    | 3.45863   | 3.57405  |
| CDKN2B-AS1 | 1.73974   | 1.81394   | 0.614116   | 0.911063 ? |           | ?        |
| CDKN2D     | 1.04917   | 1.10707   | 0.386425   | 1.15801    | 1.86719   | 1.85556  |
| CDKN3      | 3.59668   | 3.49861   | 2.98641    | 3.69692    | 3.86521   | 4.5856   |
| CDON       | 2.42292   | 2.79612   | 4.36607    | 4.83615    | 5.36473   | 5.7211   |
| CDPF1      | 1.32887   | 1.44408   | 1.69915    | 1.85698    | 0.969108  | 1.55071  |

|           |           |           |           |           |            |            |
|-----------|-----------|-----------|-----------|-----------|------------|------------|
| CDR2      | 3.41537   | 3.44751   | 3.64848   | 4.24058   | 3.80724    | 3.74455    |
| CDR2L     | 1.89714   | 1.57061   | 3.27796   | 3.48176   | 3.43245    | 2.95507    |
| CDRT1     | -2.1617   | -2.32862  | 2.08655   | 2.61931   | 0.109133   | -0.417199  |
| CDS1      | 1.76855   | 2.0007    | 1.51695   | 2.06112   | -0.0163223 | -0.0627204 |
| CDS2      | 5.82325   | 6.00628   | 6.30882   | 6.67414   | 5.78574    | 6.11185    |
| CDT1      | 2.76853   | 2.64307   | 2.12028   | 2.37097   | 1.86328    | 1.64205    |
| CDV3      | 6.54696   | 6.50458   | 6.05965   | 6.45509   | 6.61181    | 6.53737    |
| CDYL      | 4.36768   | 4.26336   | 4.29625   | 4.50863   | 5.16384    | 5.17822    |
| CDYL2     | 4.45889   | 4.46048   | 3.21523   | 3.54222   | -2.95876   | -2.70579   |
| CEBPA     | -0.856614 | -1.01204  | -0.861492 | -0.885268 | 1.27925    | 2.04911    |
| CEBPB     | 3.0537    | 2.85411   | 3.49339   | 4.02748   | 2.92006    | 3.09411    |
| CEBPD     | 4.00135   | 3.02098   | 3.41639   | 3.59334   | 1.76178    | 0.736302   |
| CEBPG     | 4.17051   | 4.1491    | 4.07267   | 4.67825   | 5.82272    | 6.07343    |
| CEBPZ     | 6.41335   | 6.60472   | 5.00827   | 5.37914   | 6.28855    | 7.14235    |
| CEBPZOS   | 4.48768   | 4.4343    | 4.08374   | 4.31917   | 4.9629     | 5.0258     |
| CECR5     | 4.51036   | 4.38498   | 3.42196   | 3.67253   | 4.3509     | 4.23286    |
| CECR7     | 3.24997   | 2.93821   | -3.24626  | -4.06966  | -4.0726 ?  |            |
| CELF1     | 6.37826   | 6.32239   | 6.2438    | 6.42378   | 6.93374    | 6.53138    |
| CELSR1    | 0.388476  | 0.344613  | 5.53027   | 5.60111   | -2.13612   | -3.38329   |
| CELSR2    | 4.97599   | 4.48333   | 3.02837   | 2.28779   | 5.24845    | 4.46946    |
| CELSR3    | 3.07407   | 3.05482   | 4.55456   | 4.77458   | 2.96723    | 3.02461    |
| CEMIP     | 1.52979   | 1.67161   | 3.32977   | 3.79148   | -0.878698  | -1.18284   |
| CEND1     | -2.05464  | -0.818747 | 0.401532  | 1.65939   | -0.152369  | 1.77713    |
| CENPA     | 3.58152   | 3.6657    | 2.79018   | 2.81332   | 3.68074    | 4.05231    |
| CENPB     | 5.3717    | 5.27016   | 5.61453   | 6.01948   | 5.00724    | 5.21883    |
| CENPBD1   | 2.57002   | 2.46195   | 1.57806   | 1.6921    | 1.18521    | 1.13881    |
| CENPBD1P1 | 3.69845   | 3.71147   | 3.29752   | 3.61964   | 4.476      | 4.77271    |
| CENPC     | 4.17403   | 4.16523   | 3.93478   | 3.88404   | 4.44776    | 4.41056    |
| CENPCP1   | 1.08511   | 1.16944   | 1.08786   | 1.02103   | 1.33236    | 1.26229    |
| CENPE     | 6.53914   | 6.66072   | 6.22953   | 6.51738   | 5.71874    | 6.41483    |
| CENPF     | 9.09303   | 9.18631   | 8.36741   | 8.64377   | 8.75454    | 8.89338    |
| CENPH     | 3.30233   | 3.32832   | 3.14291   | 3.45532   | 3.34812    | 3.75066    |
| CENPI     | 4.21679   | 4.2254    | 4.42749   | 4.76075   | 4.08537    | 4.34992    |
| CENPJ     | 4.86125   | 4.87479   | 5.15462   | 5.41076   | 3.96083    | 3.75067    |
| CENPK     | 3.48704   | 3.76957   | 3.90128   | 4.15209   | 3.89427    | 4.32533    |
| CENPL     | 3.92571   | 3.91544   | 3.27796   | 3.67417   | 3.72554    | 4.06147    |
| CENPM     | 2.66506   | 2.46198   | 2.8933    | 3.09819   | 2.2008     | 2.53647    |
| CENPN     | 4.32988   | 4.3927    | 3.83952   | 4.46978   | 3.73418    | 4.3968     |
| CENPO     | 5.02749   | 5.08164   | 4.31223   | 4.5573    | 4.66451    | 4.52746    |
| CENPP     | 3.50358   | 3.44858   | 3.06571   | 3.22201   | 2.71686    | 2.75536    |
| CENPQ     | 2.93755   | 3.17197   | 2.42012   | 3.04852   | 3.44821    | 4.42899    |
| CENPT     | 3.3697    | 3.27015   | 4.0477    | 4.23547   | 4.21467    | 3.5856     |
| CENPU     | 4.91227   | 5.10194   | 3.73813   | 3.84135   | 3.98041    | 4.26505    |
| CENPW     | 2.06912   | 1.94657   | 1.74132   | 2.02048   | 2.61583    | 3.01439    |
| CEP104    | 3.52371   | 3.43803   | 3.3498    | 3.72406   | 3.97811    | 3.71324    |
| CEP112    | 1.74388   | 1.64571   | 2.99123   | 3.07344   | 0.529541   | 0.224139   |
| CEP120    | 4.38838   | 4.44553   | 3.99265   | 4.43805   | 4.33687    | 4.69523    |
| CEP126    | -0.395122 | -0.375208 | 2.85266   | 2.77076   | 1.41119    | 1.78517    |
| CEP128    | 4.2153    | 4.42741   | 3.58301   | 3.83954   | 2.91712    | 2.74451    |
| CEP131    | 2.99597   | 2.76561   | 2.65569   | 2.89961   | 2.34217    | 2.10626    |
| CEP135    | 3.49936   | 3.84093   | 2.21737   | 2.38704   | 4.83103    | 4.81389    |
| CEP152    | 5.31179   | 5.23946   | 5.27038   | 5.33847   | 4.6696     | 4.25132    |

|           |           |            |          |           |           |           |
|-----------|-----------|------------|----------|-----------|-----------|-----------|
| CEP162    | 3.86886   | 3.55813    | 3.00383  | 2.74916   | 2.95624   | 3.2677    |
| CEP164    | 4.00914   | 4.1417     | 4.44035  | 4.61653   | 3.80729   | 3.84787   |
| CEP164P1  | -0.13522  | 0.362666   | 0.310131 | 0.337174  | 0.14496   | 0.0480548 |
| CEP170    | 7.10557   | 7.12986    | 6.31224  | 6.2946    | 6.43248   | 6.20921   |
| CEP170B   | 3.61832   | 3.34129    | 2.53074  | 2.5494    | 2.58762   | 2.43285   |
| CEP170P1  | 2.37222   | 2.59311    | 1.61806  | 1.52149   | 1.63704   | 1.20699   |
| CEP19     | 0.604783  | 0.432061   | 2.45674  | 2.73038   | 1.40582   | 1.24753   |
| CEP192    | 5.24964   | 5.19669    | 5.62463  | 5.70413   | 5.51617   | 5.83873   |
| CEP250    | 6.40433   | 6.34       | 5.51768  | 5.71584   | 5.49684   | 4.60842   |
| CEP290    | 4.60848   | 4.62481    | 5.0789   | 5.07868   | 4.39551   | 4.67984   |
| CEP295    | 4.99759   | 4.93274    | 5.75115  | 5.82249   | 5.09348   | 4.8954    |
| CEP295NL  | 0.598413  | 0.596954   | 0.93647  | 0.752877  | 0.441303  | 0.0242771 |
| CEP350    | 7.48371   | 7.40188    | 6.66764  | 6.75419   | 6.47203   | 6.45755   |
| CEP41     | 3.73032   | 3.52015    | 4.39955  | 4.46954   | 3.90478   | 3.98328   |
| CEP44     | 3.4858    | 3.67032    | 3.63183  | 3.74378   | 3.2105    | 3.31129   |
| CEP55     | 5.57788   | 5.70301    | 4.67834  | 5.24817   | 5.81691   | 6.18543   |
| CEP57     | 4.53272   | 4.67029    | 5.25474  | 5.51456   | 4.66836   | 5.10385   |
| CEP57L1   | 2.38811   | 2.70472    | 3.49979  | 3.62015   | 3.59592   | 3.8623    |
| CEP57L1P1 | -0.789334 | -0.441546  | 0.486436 | 0.596859  | 0.909443  | 1.3534    |
| CEP63     | 3.51896   | 3.35168    | 3.4513   | 3.71734   | 2.98766   | 2.90043   |
| CEP68     | 3.86214   | 3.788      | 3.92097  | 3.95701   | 3.24264   | 2.98702   |
| CEP70     | 3.73554   | 3.56506    | 3.4889   | 3.66924   | 3.18204   | 3.74656   |
| CEP72     | 2.41894   | 2.35109    | 2.43559  | 2.29404   | 1.59248   | 1.0747    |
| CEP76     | 2.24683   | 2.44725    | 1.97617  | 2.656     | 2.61286   | 2.96534   |
| CEP78     | 4.97157   | 5.05087    | 4.35466  | 4.52325   | 4.59116   | 4.57984   |
| CEP83     | 3.96933   | 4.04473    | 3.00793  | 2.99447   | 3.17384   | 3.6207    |
| CEP85     | 5.1235    | 5.17423    | 4.74424  | 4.94373   | 5.05007   | 4.89876   |
| CEP85L    | 3.93664   | 3.89691    | 3.77212  | 3.75381   | 4.72445   | 4.58675   |
| CEP89     | 3.2048    | 3.33481    | 3.9301   | 4.1462    | 3.83954   | 3.52691   |
| CEP95     | 4.45457   | 4.3492     | 4.39597  | 4.35472   | 4.6479    | 4.19852   |
| CEP97     | 4.88352   | 5.2087     | 4.83328  | 5.22767   | 4.26449   | 4.42642   |
| CEPT1     | 4.30484   | 4.38618    | 4.60436  | 4.67148   | 4.42217   | 4.88588   |
| CERCAM    | 4.03647   | 3.97282    | 3.89328  | 4.0023    | 2.92841   | 2.7609    |
| CERK      | 5.2667    | 4.60323    | 5.65921  | 5.52234   | 5.05607   | 4.28197   |
| CERKL     | 4.20329   | 4.19625    | 1.5913   | 1.77384   | 3.16942   | 3.27628   |
| CERS2     | 6.77064   | 6.82295    | 6.57118  | 6.96705   | 6.76776   | 6.87568   |
| CERS4     | 0.631914  | -0.140771  | 0.849967 | 0.978694  | 3.02794   | 2.87825   |
| CERS5     | 4.09939   | 4.08982    | 4.21093  | 4.40391   | 3.77328   | 3.64864   |
| CERS6     | 5.46337   | 5.85149    | -1.031   | -1.32478  | 5.09032   | 5.39938   |
| CES1      | -5.69162  | -5.45651   | 2.34864  | 2.87086 ? |           | ?         |
| CES2      | 3.66287   | 3.66772    | 4.54184  | 4.94644   | 4.21769   | 4.22253   |
| CETN2     | 3.99004   | 3.91977    | 3.8263   | 4.15326   | 3.81946   | 4.3087    |
| CETN3     | 2.15269   | 2.12963    | 3.14964  | 3.31744   | 3.02093   | 3.75476   |
| CFAP20    | 3.67813   | 3.7466     | 3.21949  | 3.82338   | 4.56368   | 4.85553   |
| CFAP36    | 3.01001   | 3.08212    | 3.37682  | 3.79204   | 3.7512    | 4.22254   |
| CFAP44    | 3.23122   | 3.30006    | 2.40558  | 2.38748   | 3.41205   | 2.85009   |
| CFAP69    | 0.710384  | 0.491443   | 2.35177  | 2.30482   | -0.729347 | -1.53638  |
| CFAP97    | 5.4302    | 5.64243    | 4.86631  | 5.19836   | 5.47507   | 5.76036   |
| CFB       | -0.470075 | -0.0533185 | 2.23349  | 3.01575   | 1.66615   | 1.90802   |
| CFDP1     | 3.90825   | 3.92732    | 3.98765  | 4.07199   | 3.84228   | 3.80898   |
| CFH       | -3.33729  | -3.73464   | 4.9817   | 4.72299   | 1.84493   | 3.0514    |
| CFI       | 4.41921   | 3.98008    | 2.70218  | 2.36286   | 1.89813   | 1.70271   |

|                |           |           |           |            |            |            |
|----------------|-----------|-----------|-----------|------------|------------|------------|
| CFL1           | 8.57807   | 8.62657   | 7.84462   | 8.31163    | 8.48224    | 8.56535    |
| CFL1P2         | 1.29013   | 1.69706   | 0.546699  | 1.48451    | 1.33513    | 1.33673    |
| CFL2           | 4.30303   | 4.36845   | 3.80941   | 4.28563    | 5.18043    | 5.69363    |
| CFLAR          | 4.93896   | 5.1265    | 3.99231   | 4.16119    | 4.7609     | 4.41803    |
| CFLAR-AS1      | 0.460533  | 0.690542  | -0.564595 | -0.0494644 | -0.0556498 | -0.141288  |
| CFTR           | -5.10914  | -4.87366  | 2.30433   | 2.16265 ?  | ?          |            |
| CGGBP1         | 5.89895   | 5.98346   | 5.69468   | 5.85208    | 5.66956    | 5.61056    |
| CGN            | 2.1713    | 2.17017   | 0.138526  | 0.334214   | 2.61349    | 2.11986    |
| CGNL1          | -2.61075  | -3.65369  | -0.568612 | -0.585061  | 5.61285    | 5.2862     |
| CGREF1         | 1.53121   | 1.38173   | -3.59683  | -2.54535   | -0.736141  | -1.28049   |
| CGRRF1         | 2.32053   | 2.37952   | 1.76487   | 2.07607    | 2.20389    | 2.908      |
| CH17-189H20.1  | 1.71409   | 1.9184    | 1.47272   | 1.02565    | 0.722597   | 0.211349   |
| CH17-258A22.4  | 0.461214  | 0.495009  | 1.80281   | 1.44149    | 1.61687    | 1.20646    |
| CH17-260O16.1  | -0.313689 | -0.166375 | 0.819807  | 0.29813    | 0.234072   | -0.115727  |
| CH17-264L24.1  | 1.47076   | 1.26464   | 2.1471    | 1.95729    | 0.415586   | 0.246201   |
| CH17-373J23.1  | -5.69162  | -4.45968  | 2.78515   | 2.64941    | -2.26731   | -1.79933   |
| CH17-431G21.1  | 0.867533  | 0.653867  | 1.42922   | 1.40492    | 1.22753    | 0.695593   |
| CH17-472G23.2  | 0.542129  | 0.503939  | -0.337661 | 0.239117   | 0.489235   | -0.147268  |
| CH17-472G23.4  | 1.66629   | 2.21654   | 4.14469   | 4.2268     | 3.98721    | 4.03043    |
| CH507-145C22.1 | 2.13389   | 2.05447   | 1.37813   | 1.98646    | -0.0800391 | -0.116184  |
| CH507-145C22.3 | 2.02663   | 1.79487   | 1.4978    | 1.63778    | 0.577683   | 0.0426724  |
| CH507-154B10.1 | 3.7083    | 3.80467   | 3.50542   | 3.54341    | 1.51987    | 0.633961   |
| CH507-154B10.2 | 3.61772   | 3.79649   | 3.22723   | 3.10194    | 1.3223     | 1.15706    |
| CH507-24F1.1   | 2.29262   | 2.42765   | 2.01396   | 1.68319    | -0.352678  | -0.0198986 |
| CH507-24F1.2   | 2.60544   | 3.08733   | 2.45553   | 2.80775    | 1.43902    | 1.33907    |
| CH507-254M2.1  | 0.992239  | 0.946259  | 1.03122   | 1.75458    | 0.377479   | 1.11984    |
| CH507-254M2.2  | 2.04513   | 1.77167   | 0.777889  | 1.50972    | 1.26064    | 2.12338    |
| CH507-254M2.3  | 2.45164   | 2.48649   | 2.60481   | 2.40871    | 0.818335   | 0.190615   |
| CH507-338C24.1 | 4.82527   | 4.83048   | 4.78667   | 4.59197    | 2.63291    | 2.154      |
| CH507-42P11.8  | -0.550148 | -1.38167  | -0.897683 | -0.540957  | 2.63423    | 1.81073    |
| CH507-513H4.3  | 1.02713   | 3.41311   | 7.42801   | 1.43329    | -1.80359   | 0.46069    |
| CH507-513H4.4  | 7.75031   | 8.61713   | 12.6292   | 6.91864    | 5.10807    | 6.66148    |
| CH507-513H4.5  | -0.397672 | 1.75668   | 5.58746   | -0.388716  | -3.11286   | -2.45144   |
| CH507-513H4.6  | 1.20632   | 3.55025   | 7.89051   | 1.4753     | -1.71001   | 0.933913   |
| CH507-528H12.1 | 1.08246   | 0.464396  | 1.51245   | 1.24889    | -0.946458  | -1.84822   |
| CH507-9B2.3    | 2.37422   | 2.07665   | 3.78822   | 4.07225    | 3.54844    | 4.1479     |
| CH507-9B2.4    | 0.830961  | 0.236903  | 0.236082  | 0.172667   | 0.851719   | 0.0433725  |
| CH507-9B2.5    | 3.0844    | 2.95934   | 3.43115   | 3.63406    | 4.25923    | 4.11761    |
| CH507-9B2.9    | 1.48736   | 1.38065   | 2.35676   | 2.73026    | 2.54763    | 2.06188    |
| CHAC1          | -0.395122 | -0.485378 | -0.300715 | 0.491176   | 1.97271    | 1.1637     |
| CHAC2          | 2.18663   | 2.58156   | 1.55122   | 1.70499    | 2.76176    | 3.08771    |
| CHAF1A         | 4.84587   | 4.77973   | 4.51605   | 4.67907    | 5.00502    | 4.46195    |
| CHAF1B         | 2.95735   | 3.02092   | 3.97129   | 4.48362    | 3.36067    | 3.16673    |
| CHAMP1         | 4.04995   | 3.88919   | 3.56802   | 3.73979    | 3.33404    | 3.35668    |
| CHCHD1         | 3.14641   | 3.12961   | 2.57804   | 3.05356    | 3.76386    | 4.69949    |
| CHCHD10        | 1.17748   | 1.16657   | 2.4083    | 2.8827 ?   | ?          |            |
| CHCHD2         | 6.10553   | 6.05701   | 5.87103   | 6.45002    | 6.27746    | 7.15944    |
| CHCHD2P6       | 2.88692   | 2.68393   | 2.66197   | 3.2352     | 3.01984    | 3.87924    |
| CHCHD3         | 5.06153   | 4.98997   | 5.15478   | 5.54663    | 5.77805    | 5.94307    |
| CHCHD3P3       | 2.3348    | 2.33628   | 2.42976   | 2.90791    | 3.15039    | 3.35111    |
| CHCHD4         | 2.80871   | 2.93578   | 2.19588   | 2.96264    | 3.02962    | 3.56476    |
| CHCHD5         | 1.52584   | 1.52019   | 0.977632  | 1.01017    | 1.53466    | 2.08121    |

|            |            |           |           |              |           |           |
|------------|------------|-----------|-----------|--------------|-----------|-----------|
| CHCHD6     | 0.908313   | 0.938098  | 1.11115   | 1.25754      | 0.714804  | 0.993783  |
| CHCHD7     | 3.41466    | 3.27356   | 3.15187   | 3.37297      | 3.06421   | 3.47071   |
| CHD1       | 6.74829    | 6.71916   | 6.18711   | 6.23822      | 6.62723   | 6.60874   |
| CHD1L      | 5.37578    | 5.40136   | 4.43441   | 4.62139      | 4.85025   | 5.03152   |
| CHD2       | 6.13736    | 6.04018   | 6.32056   | 6.35323      | 6.68427   | 6.1661    |
| CHD3       | 6.07158    | 5.83547   | 6.6878    | 6.71371      | 6.53793   | 5.90661   |
| CHD4       | 8.21674    | 8.22048   | 7.67274   | 7.79398      | 8.37877   | 8.01372   |
| CHD6       | 7.09414    | 7.11207   | 6.75549   | 6.80292      | 5.97472   | 5.53705   |
| CHD7       | 6.34137    | 6.21001   | 5.12765   | 4.78598      | 3.76386   | 2.95863   |
| CHD8       | 6.55696    | 6.58341   | 5.96526   | 6.14796      | 6.44244   | 6.04982   |
| CHD9       | 6.21144    | 6.15045   | 6.30812   | 6.31948      | 7.10916   | 7.23102   |
| CHEK1      | 4.40289    | 4.55743   | 4.20879   | 4.53592      | 4.79398   | 4.89691   |
| CHEK2      | 3.69946    | 3.65089   | 3.15096   | 3.26628      | 2.17522   | 2.43546   |
| CHERP      | 2.9407     | 2.60145   | 2.54893   | 2.44411      | 3.13834   | 3.02463   |
| CHFR       | 3.21381    | 3.09175   | 2.34788   | 2.15331      | 3.51959   | 3.27354   |
| CHI3L1     | -5.69162 ? |           | 1.68069   | 3.30903 ?    |           | -4.70296  |
| CHIC1      | 3.46331    | 3.6509    | 3.84438   | 4.29525      | 4.87301   | 5.32187   |
| CHIC2      | 1.75628    | 1.84096   | 1.51      | 1.61231      | 4.50144   | 4.93443   |
| CHID1      | 5.30478    | 5.181     | 5.04589   | 5.24707      | 4.81034   | 4.85933   |
| CHKA       | 3.59701    | 3.3489    | 3.60984   | 3.67484      | 3.01509   | 2.44551   |
| CHKB       | 3.31036    | 2.84557   | 3.48876   | 3.52813      | 2.70515   | 2.27344   |
| CHKB-CPT1B | 0.784194   | 0.720918  | -0.129527 | -0.000613276 | -1.96728  | -0.157439 |
| CHM        | 4.09533    | 4.08018   | 4.17182   | 4.4342       | 4.83504   | 5.13405   |
| CHML       | 5.66395    | 5.37556   | 5.84817   | 5.74642      | 6.3786    | 5.79561   |
| CHMP1A     | 4.77157    | 4.70393   | 4.47735   | 4.85984      | 4.71471   | 4.85839   |
| CHMP1B     | 3.35067    | 3.11997   | 4.40388   | 4.7253       | 4.56451   | 4.43945   |
| CHMP2A     | 4.42761    | 4.19446   | 4.37489   | 4.42935      | 5.23943   | 5.37875   |
| CHMP2B     | 4.64354    | 4.75146   | 3.54099   | 4.05607      | 4.04703   | 4.34041   |
| CHMP3      | 5.24462    | 5.15511   | 4.40752   | 4.55755      | 5.63862   | 5.7107    |
| CHMP4A     | 1.76367    | 1.81174   | 1.37558   | 1.52378      | 2.11812   | 2.16835   |
| CHMP4B     | 4.4202     | 4.32171   | 4.36976   | 4.67342      | 4.30255   | 4.27317   |
| CHMP4BP1   | 0.393405   | 0.167897  | 0.215045  | 0.0392507    | 0.0682168 | -0.569922 |
| CHMP5      | 4.38937    | 4.53003   | 4.08736   | 4.5343       | 6.04308   | 6.73325   |
| CHMP6      | 2.45575    | 2.21313   | 2.54781   | 2.70817      | 2.88659   | 3.10386   |
| CHMP7      | 4.77717    | 4.69892   | 4.60763   | 4.90027      | 4.38475   | 4.65741   |
| CHN1       | 3.93391    | 3.91001   | 3.92107   | 4.26621      | 6.09538   | 6.77961   |
| CHORDC1    | 4.8852     | 4.88969   | 6.03678   | 6.05529      | 5.29349   | 4.92573   |
| CHP1       | 4.99309    | 4.7405    | 4.6876    | 4.97664      | 5.40405   | 5.32533   |
| CHPF       | 4.52222    | 3.94941   | 4.42382   | 4.27056      | 4.59382   | 4.76189   |
| CHPF2      | 5.92139    | 5.86697   | 6.11512   | 6.45987      | 6.48886   | 6.55039   |
| CHPT1      | 4.98156    | 5.22275   | 4.0968    | 4.5353       | 3.99553   | 4.47386   |
| CHRAC1     | 3.39895    | 3.42895   | 3.00877   | 3.42645      | 3.92276   | 3.60389   |
| CHRDL1     | 5.27996    | 4.86415 ? |           | -6.09892     | 2.95808   | 3.73623   |
| CHRM3      | 4.10978    | 3.59187   | 0.386425  | 0.111031     | 1.95201   | 1.34861   |
| CHRNA5     | 2.38906    | 2.59493   | 2.22532   | 2.59344      | 3.52263   | 4.01615   |
| CHRN1      | 0.539412   | 0.456112  | 1.27595   | 1.32585      | 2.15669   | 2.25909   |
| CHRN2      | 1.20786    | 1.23706   | 1.07761   | 0.615671     | -0.233893 | -0.981411 |
| CHST1      | 2.42238    | 2.8016    | 1.20884   | 1.87419      | 2.00851   | 2.69418   |
| CHST10     | 4.13143    | 4.22801   | 2.48892   | 2.65605      | 3.4983    | 3.44304   |
| CHST11     | 7.01388    | 6.82329   | 3.1541    | 3.67417      | 2.45864   | 2.25909   |
| CHST12     | 3.79176    | 3.56367   | 3.85814   | 3.65438      | 3.10456   | 2.84404   |
| CHST14     | 4.65075    | 4.3581    | 3.80517   | 3.6494       | 3.05908   | 2.82077   |

|              |           |          |            |            |            |           |
|--------------|-----------|----------|------------|------------|------------|-----------|
| CHST15       | 2.19576   | 2.20251  | 5.59536    | 5.59073    | -5.07051 ? |           |
| CHST2        | 2.24052   | 2.60056  | 0.82777    | 1.34243    | 2.22845    | 2.99719   |
| CHST3        | 5.98982   | 5.78981  | 4.02227    | 4.03837    | 6.62595    | 6.07422   |
| CHST6        | 4.21829   | 4.31193  | -4.59508   | -3.78492   | -3.07415   | -2.70579  |
| CHST7        | -0.026521 | 0.076436 | 1.12941    | 1.49112    | 1.28225    | 1.78517   |
| CHSY1        | 6.61886   | 6.38537  | 5.44993    | 5.54983    | 6.06976    | 5.14189   |
| CHSY3        | 2.07902   | 1.69706  | -4.18092   | -6.09892   | 0.210164   | 0.151378  |
| CHTF18       | 2.76036   | 2.47895  | 3.13841    | 3.27217    | 2.08454    | 1.9868    |
| CHTF8        | 4.66122   | 4.64502  | 4.91385    | 5.22153    | 5.73521    | 6.17095   |
| CHTOP        | 5.19406   | 5.17367  | 4.73937    | 4.92763    | 5.4101     | 5.26833   |
| CHUK         | 4.57353   | 4.76475  | 4.17072    | 4.66512    | 5.32126    | 5.7786    |
| CHURC1       | 4.57641   | 4.68518  | 3.35564    | 3.58553    | 3.92458    | 4.76548   |
| CIAO1        | 5.85478   | 5.94603  | 4.85676    | 5.02237    | 6.35631    | 6.57171   |
| CIAPIN1      | 4.66296   | 4.75441  | 4.47503    | 5.0323     | 5.55201    | 5.95774   |
| CIAPIN1P     | 1.04114   | 1.23175  | 1.05118    | 1.73307    | 2.01045    | 2.18189   |
| CIART        | 0.710384  | 0.581631 | 0.460428   | 0.95732    | 1.71041    | 1.12623   |
| CIB1         | 2.97688   | 2.89898  | 3.15849    | 3.73034    | 3.64004    | 4.04817   |
| CIC          | 3.70179   | 2.97596  | 3.94962    | 3.70175    | 4.55885    | 4.4187    |
| CICP14       | 2.69508   | 2.40656  | 2.71269    | 2.67967    | 2.81905    | 2.15232   |
| CIDECP       | 1.69756   | 1.74664  | 1.59787    | 2.13437    | 2.19146    | 1.81688   |
| CIITA        | 4.7782    | 4.12257  | 2.74648    | 3.1301     | -0.706947  | -1.14273  |
| CINP         | 3.75603   | 3.63848  | 2.58397    | 2.95646    | 3.72968    | 3.9925    |
| CIPC         | 4.11149   | 4.31162  | 2.59127    | 2.91208    | 3.68065    | 3.69392   |
| CIR1         | 3.23687   | 3.1307   | 4.18156    | 4.33898    | 3.3605     | 3.66321   |
| CIR1P1       | -0.506845 | -0.39658 | 0.431281   | 0.798133   | -0.682812  | -0.214706 |
| CIRBP        | 5.10181   | 5.04444  | 5.20824    | 5.23823    | 6.15607    | 5.95727   |
| CIRBP-AS1    | 0.278306  | 0.076436 | -0.0541032 | -0.0426024 | 0.293994   | 0.247587  |
| CIRH1A       | 4.38173   | 4.26592  | 4.00506    | 4.26946    | 5.22003    | 5.19037   |
| CISD1        | 3.30935   | 3.49717  | 3.53415    | 3.88269    | 4.11282    | 4.66941   |
| CISD2        | 4.12974   | 4.10874  | 3.83465    | 3.91617    | 4.6559     | 4.25313   |
| CISD3        | 2.95102   | 2.97673  | 3.04908    | 3.41335    | 3.62909    | 4.07735   |
| CIT          | 7.18163   | 7.20819  | 5.53415    | 5.64063    | 4.61172    | 4.37942   |
| CITED2       | 1.25516   | 1.11464  | 4.02592    | 3.81895    | 3.84549    | 3.54358   |
| CITF22-1A6.3 | 1.21307   | 0.841893 | 1.81614    | 1.78543    | 0.249081   | 0.959941  |
| CIZ1         | 4.19346   | 4.18641  | 3.85813    | 4.11396    | 4.38612    | 4.2975    |
| CKAP2        | 5.54793   | 5.71144  | 5.06261    | 5.57328    | 5.24545    | 5.54061   |
| CKAP2L       | 6.84304   | 7.03987  | 4.72994    | 5.02117    | 4.62605    | 4.89212   |
| CKAP4        | 7.7031    | 7.82883  | 7.32624    | 7.91535    | 7.19659    | 7.78479   |
| CKAP5        | 7.06094   | 7.04801  | 7.07844    | 7.37459    | 7.60959    | 7.36887   |
| CKB          | 0.952035  | 0.305445 | -0.973801  | -0.860651  | 5.50366    | 5.55243   |
| CKLF         | 3.10627   | 3.27739  | 3.18445    | 3.67866    | 4.25697    | 5.02681   |
| CKMT2        | 0.0954519 | 0.237698 | 1.31637    | 1.13916    | -0.338214  | -0.619042 |
| CKMT2-AS1    | 1.80477   | 1.79928  | 2.53416    | 2.64941    | 1.84751    | 1.50278   |
| CKS1B        | 4.99717   | 4.97574  | 4.34997    | 4.97494    | 4.55948    | 5.01841   |
| CKS1BP3      | 2.75368   | 2.70388  | 2.11083    | 2.65695    | 2.37983    | 2.76472   |
| CKS2         | 4.47147   | 4.53644  | 3.84576    | 4.39001    | 5.04443    | 6.10706   |
| CLASP1       | 6.99449   | 7.26379  | 6.51866    | 6.54236    | 5.68239    | 5.26055   |
| CLASP2       | 5.42858   | 5.59312  | 4.45491    | 4.73822    | 5.33226    | 5.6152    |
| CLASRP       | 3.0186    | 2.81328  | 3.0926     | 3.0611     | 3.59116    | 2.77307   |
| CLCA2        | -4.11163  | -4.87366 | 2.22164    | 2.63602    | -4.33548   | -4.70296  |
| CLCC1        | 4.86268   | 4.953    | 5.15034    | 5.24705    | 5.41165    | 5.10278   |
| CLCF1        | 1.68033   | 1.42594  | 0.73541    | 1.2041     | 2.57332    | 2.83245   |

|         |           |           |           |              |           |           |
|---------|-----------|-----------|-----------|--------------|-----------|-----------|
| CLCN2   | 1.82842   | 1.75635   | 1.7707    | 1.90801      | 2.30549   | 2.48805   |
| CLCN3   | 5.91423   | 5.93453   | 4.76557   | 5.0859       | 6.36759   | 6.50241   |
| CLCN4   | 3.35621   | 3.57194   | 3.30231   | 3.72722      | 2.4767    | 2.908     |
| CLCN5   | 5.95601   | 5.41786   | 3.47647   | 3.21536      | 2.99254   | 2.47817   |
| CLCN6   | 3.58294   | 3.24205   | 3.56759   | 3.64948      | 3.67261   | 3.37466   |
| CLCN7   | 4.00007   | 3.42033   | 4.23275   | 4.10428      | 3.95738   | 3.30029   |
| CLDN1   | 0.0289651 | 0.237698  | -0.428455 | -0.000171691 | 1.96542   | 0.597145  |
| CLDN11  | 0.399051  | 0.0918691 | 1.91979   | 1.97335      | -2.48858  | -3.38329  |
| CLDN12  | 5.88888   | 5.73627   | 5.11603   | 5.1893       | 5.39092   | 5.1881    |
| CLDN15  | 1.82451   | 1.38268   | 1.11115   | 1.21315      | 1.33409   | 0.422664  |
| CLDN18  | 0.133932  | 0.395227  | 0.723445  | 0.414828     | -0.932127 | -1.12145  |
| CLDN20  | 0.784805  | 0.581631  | 0.686917  | 0.535117     | 0.983605  | 0.463298  |
| CLDN4   | 0.0559314 | -0.195907 | 0.636738  | 0.810106     | 0.147163  | -0.38461  |
| CLDND1  | 5.56682   | 5.64957   | 5.30179   | 5.55916      | 4.41315   | 4.89968   |
| CLEC16A | 3.61267   | 3.70833   | 3.83745   | 3.95995      | 3.767     | 3.64643   |
| CLEC18A | 1.72631   | 1.44831   | -5.59166  | -2.45428     | -3.21128  | -3.15974  |
| CLEC2B  | ?         | ?         | 3.23656   | 3.60091      | 3.63916   | 4.58685   |
| CLEC2D  | 1.23238   | 1.22563   | 1.94503   | 2.29656      | 2.16367   | 2.22785   |
| CLEC7A  | ?         | ?         | 1.5913    | 0.619178     | 1.59711   | 0.937201  |
| CLGN    | 1.51041   | 1.45606   | 2.46395   | 2.71773      | 3.79811   | 4.4707    |
| CLHC1   | 1.61837   | 1.91324   | 2.34397   | 2.24394      | 2.1594    | 2.22994   |
| CLIC1   | 6.34972   | 6.41131   | 6.49052   | 7.12866      | 7.37099   | 8.07582   |
| CLIC1P1 | 0.705412  | 0.959941  | 1.25524   | 1.73943      | 1.84826   | 2.28641   |
| CLIC2   | -2.61075  | -2.6546   | 2.35177   | 3.01271      | -0.374735 | 0.463298  |
| CLIC4   | 7.08648   | 7.00733   | 6.97386   | 7.40342      | 7.41645   | 7.52905   |
| CLIC4P1 | 2.48372   | 2.16764   | 2.24222   | 2.54937      | 2.40894   | 3.19799   |
| CLIC4P3 | 1.64547   | 1.69043   | 1.52658   | 1.7854       | 1.96966   | 1.9602    |
| CLINT1  | 5.70445   | 5.79128   | 6.14514   | 6.54848      | 6.45811   | 6.5527    |
| CLIP1   | 6.01143   | 6.01236   | 5.58755   | 6.01513      | 6.18221   | 5.97676   |
| CLIP2   | 3.02884   | 3.07632   | 4.45762   | 4.74525      | 4.38406   | 4.17287   |
| CLIP3   | 1.60929   | 1.08411   | 1.5647    | 1.45345      | 2.02971   | 1.91536   |
| CLIP4   | 5.88069   | 6.01313   | 5.11854   | 5.56536      | 5.95278   | 6.05566   |
| CLK1    | 4.99397   | 4.90019   | 4.09956   | 4.24872      | 5.73119   | 5.75425   |
| CLK2    | 4.50132   | 4.35845   | 3.99685   | 3.91839      | 4.42112   | 3.72965   |
| CLK2P1  | 0.869319  | 0.742679  | 0.131774  | 0.407026     | 0.715401  | 0.0791016 |
| CLK3    | 5.14078   | 5.01936   | 5.44199   | 5.55025      | 5.31558   | 4.79079   |
| CLK4    | 4.26129   | 4.32389   | 4.68153   | 4.57543      | 4.02249   | 3.93726   |
| CLMN    | 6.51874   | 6.47123   | 2.16964   | 2.81302      | -2.20023  | -1.79933  |
| CLMP    | 5.09776   | 5.04097   | 5.49331   | 5.87843      | 5.0841    | 5.75066   |
| CLN3    | 2.61608   | 2.68182   | 2.85738   | 3.18812      | 3.20388   | 3.13564   |
| CLN5    | 3.89601   | 3.83322   | 3.66322   | 3.90273      | 4.41193   | 5.12121   |
| CLN6    | 4.40158   | 4.0821    | 4.23535   | 4.17308      | 4.40909   | 4.0126    |
| CLN8    | 3.43285   | 3.57196   | 3.9723    | 4.05592      | 4.52775   | 4.36838   |
| CLNS1A  | 6.46675   | 6.45189   | 5.03684   | 5.35111      | 5.28731   | 5.61352   |
| CLOCK   | 5.52248   | 5.66706   | 5.15465   | 5.28883      | 6.57895   | 6.9765    |
| CLP1    | 3.30794   | 3.33805   | 2.58136   | 3.11999      | 3.40328   | 3.78923   |
| CLPB    | 5.31459   | 5.21841   | 4.20987   | 4.44959      | 3.88078   | 3.80503   |
| CLPP    | 2.69753   | 2.51445   | 2.17405   | 2.49851      | 3.74908   | 3.91533   |
| CLPTM1  | 4.99484   | 5.0989    | 5.46077   | 5.76729      | 5.63344   | 5.77204   |
| CLPTMIL | 5.9163    | 6.00043   | 4.92498   | 5.34392      | 6.68221   | 6.87846   |
| CLPX    | 4.68083   | 4.60188   | 4.31532   | 4.41669      | 4.70218   | 4.6073    |
| CLSPN   | 5.287     | 5.38635   | 4.68203   | 4.85102      | 5.07594   | 4.64963   |



|              |          |          |            |           |           |           |
|--------------|----------|----------|------------|-----------|-----------|-----------|
| CLSTN1       | 6.53124  | 6.54331  | 6.05334    | 5.91733   | 6.70816   | 6.49261   |
| CLSTN2       | -6.68418 | -2.00285 | 8.26595    | 7.56407 ? |           | -5.69922  |
| CLSTN3       | 3.55595  | 3.19537  | 3.32823    | 3.25312   | 2.0086    | 1.74453   |
| CLTA         | 5.25324  | 5.1546   | 4.92692    | 5.36233   | 6.92329   | 7.14832   |
| CLTB         | 3.1589   | 2.90785  | 2.72637    | 3.31324   | 3.96265   | 4.24748   |
| CLTC         | 9.00614  | 9.02403  | 8.86563    | 9.1689    | 9.70772   | 9.73784   |
| CLTCL1       | 3.08883  | 2.9187   | 3.37107    | 3.28134   | 2.26748   | 1.76905   |
| CLU          | 1.04244  | 1.49139  | 6.62282    | 7.32773   | 5.88078   | 5.35127   |
| CLUAP1       | 2.91797  | 2.92363  | 3.27386    | 3.39302   | 2.45084   | 2.25331   |
| CLUH         | 4.24686  | 4.00809  | 4.15521    | 4.33618   | 4.80014   | 4.51969   |
| CLUHP3       | 2.17438  | 1.91656  | 2.23435    | 2.15329   | 0.740643  | -0.121607 |
| CMAS         | 4.30022  | 4.40364  | 3.65253    | 3.84681   | 3.23754   | 3.50274   |
| CMB9-55A18.1 | 1.19245  | 1.46804  | 1.79797    | 1.8027    | 1.32695   | 0.914013  |
| CMB9-55F22.1 | 0.840145 | 0.548466 | 0.986462   | 0.999755  | -0.777435 | -1.53638  |
| CMBL         | 2.62286  | 2.60594  | 4.60192    | 4.81523   | 2.42451   | 2.82468   |
| CMC1         | 3.16358  | 3.18301  | 3.03787    | 2.93357   | 3.30169   | 3.86455   |
| CMC2         | 4.39489  | 4.55125  | 4.32843    | 4.40782   | 3.79193   | 4.38306   |
| CMC4         | 0.590386 | 0.669762 | 1.23844    | 1.23698   | 2.04684   | 2.91844   |
| CMIP         | 2.83036  | 2.64045  | 3.26356    | 3.09085   | 2.46124   | 2.00755   |
| CMPK1        | 5.98104  | 5.64926  | 6.0146     | 6.0529    | 6.62347   | 6.33392   |
| CMSS1        | 4.28961  | 4.36924  | 3.66197    | 4.07605   | 3.70163   | 4.23138   |
| CMTM3        | 3.3219   | 3.48406  | 3.87582    | 3.95996   | 3.90955   | 4.57522   |
| CMTM4        | 4.73658  | 4.89801  | 4.97065    | 5.12417   | 5.28987   | 5.26194   |
| CMTM6        | 6.4986   | 6.67139  | 5.98387    | 6.50816   | 6.43587   | 6.88417   |
| CMTM7        | 5.2194   | 5.12544  | -3.18222   | -2.78461  | 4.10136   | 3.56849   |
| CMTM8        | 1.35081  | 1.03706  | 1.87179    | 2.03585   | 2.85145   | 2.91534   |
| CMTR1        | 4.80623  | 4.76235  | 5.06736    | 5.30796   | 5.38715   | 5.42385   |
| CMTR2        | 3.82056  | 4.12867  | 4.13953    | 4.42061   | 4.87739   | 5.55538   |
| CMYA5        | 1.36166  | 1.02906  | -0.375995  | -0.55404  | 1.80324   | 1.42261   |
| CNBP         | 6.45906  | 6.59515  | 5.62663    | 6.18952   | 6.64161   | 7.25656   |
| CNDP2        | 5.02968  | 4.98989  | 5.00568    | 5.4719    | 3.74483   | 3.7991    |
| CNEP1R1      | 2.64965  | 2.6587   | 3.24274    | 3.57942   | 3.82123   | 3.95826   |
| CNIH1        | 5.59668  | 5.79747  | 4.75678    | 5.20801   | 5.45278   | 6.13877   |
| CNIH2        | 0.850599 | 0.726849 | -0.959641  | -0.842149 | 0.185296  | 0.0483059 |
| CNIH3        | 0.207918 | 0.318612 | 1.51       | 1.82784   | -0.23389  | 0.483199  |
| CNIH4        | 4.84587  | 4.76646  | 4.82198    | 5.1943    | 4.98744   | 5.57114   |
| CNKSR2       | 2.68031  | 2.65351  | -6.17309 ? |           | 2.07442   | 1.75275   |
| CNKSR3       | 3.37372  | 3.80842  | 4.16936    | 4.23781   | 5.07753   | 4.30988   |
| CNN2         | 4.71979  | 4.25329  | 5.4401     | 5.26369   | 6.28373   | 5.58284   |
| CNN3         | 6.95126  | 6.88076  | 6.23542    | 6.74949   | 8.72626   | 8.82142   |
| CNNM2        | 3.67725  | 3.44852  | 4.73037    | 4.52618   | 4.24686   | 3.76825   |
| CNNM3        | 3.79641  | 3.88702  | 3.14639    | 2.91638   | 3.32498   | 2.95949   |
| CNNM4        | 3.73346  | 3.7405   | 3.26563    | 3.25093   | 3.4165    | 2.92629   |
| CNOT1        | 6.73916  | 6.61723  | 7.55576    | 7.71587   | 8.01618   | 7.78004   |
| CNOT10       | 4.43341  | 4.52442  | 3.4108     | 3.81747   | 4.46122   | 4.92719   |
| CNOT11       | 4.33984  | 4.44704  | 3.85265    | 4.19495   | 4.69998   | 4.88853   |
| CNOT2        | 5.67991  | 5.61936  | 5.07442    | 5.14617   | 4.98404   | 5.05435   |
| CNOT3        | 3.32108  | 3.02307  | 3.43379    | 3.17553   | 3.23714   | 2.69129   |
| CNOT4        | 3.77259  | 3.72944  | 3.87717    | 3.80909   | 3.54426   | 3.14504   |
| CNOT6        | 4.73762  | 4.72203  | 5.58508    | 5.58814   | 5.24918   | 5.22254   |
| CNOT6L       | 4.52285  | 4.59769  | 4.45529    | 4.37369   | 4.11945   | 4.11296   |
| CNOT6LP1     | 0.514743 | 0.796797 | 0.811767   | 1.19757   | 0.246092  | 0.277794  |

|           |           |           |           |           |            |          |
|-----------|-----------|-----------|-----------|-----------|------------|----------|
| CNOT7     | 5.69159   | 5.72093   | 5.55873   | 5.69265   | 5.99376    | 6.37656  |
| CNOT7P1   | 0.207918  | 0.392878  | 0.150729  | 0.237662  | 0.154778   | 0.708028 |
| CNOT8     | 3.97776   | 3.97594   | 4.74795   | 5.04978   | 4.7821     | 4.92899  |
| CNP       | 6.30822   | 6.21604   | 5.55994   | 5.86017   | 6.71691    | 6.48685  |
| CNPPD1    | 3.22822   | 3.13627   | 3.38221   | 3.65597   | 4.45907    | 4.5255   |
| CNPY2     | 5.98792   | 5.79203   | 4.55879   | 5.04473   | 4.60564    | 5.42845  |
| CNPY3     | 5.15773   | 4.98629   | 3.42935   | 3.6494    | 4.75595    | 4.84882  |
| CNPY4     | 3.95814   | 3.57312   | 3.95344   | 3.86675   | 2.74012    | 2.56895  |
| CNR1      | 1.22578   | 1.57061   | -6.17309  | -5.10387  | 7.67148    | 7.83872  |
| CNRIP1    | 3.68678   | 3.71706   | 4.21842   | 4.73116   | 4.19689    | 4.74139  |
| CNST      | 4.69      | 4.69322   | 4.35466   | 4.5485    | 4.9849     | 4.85933  |
| CNTD1     | 0.617054  | 1.09329   | 0.604565  | 0.465222  | 1.06392    | 0.891917 |
| CNTF      | 1.17663   | 1.34632   | 1.36867   | 1.55857   | 0.668927   | 0.305048 |
| CNTLN     | 3.95465   | 3.94229   | 4.10649   | 3.84972   | 4.6812     | 4.93983  |
| CNTN1     | 2.16202   | 1.74176   | -5.1783 ? | ?         |            | -5.69922 |
| CNTNAP1   | 4.8548    | 4.66183   | 3.98667   | 4.03831   | 2.64403    | 2.58747  |
| CNTNAP2   | -1.61119  | -1.81849  | -3.85951  | -3.52222  | 3.46381    | 3.78714  |
| CNTNAP3   | 5.69257   | 5.816     | 4.32511   | 4.42546   | 5.19629    | 5.0462   |
| CNTNAP3B  | 5.83251   | 5.82419   | 3.21309   | 3.04827   | 3.7895     | 3.44571  |
| CNTNAP3P2 | 3.29862   | 3.4177    | 0.602818  | 0.468823  | 1.49035    | 0.792072 |
| CNTRL     | 4.15735   | 4.33725   | 4.20772   | 4.28348   | 3.61697    | 3.54594  |
| CNTROB    | 3.88682   | 3.83636   | 4.11224   | 4.18004   | 4.65426    | 4.21215  |
| COA1      | 5.91585   | 5.93642   | 5.72598   | 5.86235   | 5.83403    | 5.99848  |
| COA3      | 3.74374   | 3.56545   | 3.76287   | 4.13647   | 4.0308     | 4.39364  |
| COA4      | 4.89757   | 4.88808   | 3.98514   | 4.42644   | 5.12267    | 5.5191   |
| COA5      | 3.52853   | 3.44554   | 3.35758   | 3.44      | 3.88754    | 4.56708  |
| COA6      | 2.36971   | 2.36343   | 2.84076   | 3.27757   | 3.51774    | 4.06455  |
| COA7      | 4.94296   | 5.107     | 3.68066   | 4.34752   | 4.42315    | 4.57984  |
| COASY     | 4.1155    | 3.76837   | 4.99139   | 5.13791   | 4.68675    | 4.31009  |
| COBL      | 3.10182   | 3.05876   | -6.17309  | -5.10387  | -5.65305   | -4.70296 |
| COBLL1    | 3.94116   | 3.88034   | 2.62384   | 2.83955   | 3.73522    | 3.47568  |
| COG1      | 3.41697   | 3.51022   | 4.22437   | 4.31409   | 4.77957    | 4.63317  |
| COG2      | 4.23754   | 4.15462   | 3.76338   | 4.03837   | 4.26228    | 4.5281   |
| COG3      | 3.93685   | 4.12651   | 4.04696   | 4.53244   | 4.12582    | 4.62838  |
| COG4      | 4.57122   | 4.54067   | 5.06499   | 5.39897   | 5.64459    | 5.78814  |
| COG5      | 5.15721   | 5.38361   | 4.624     | 5.00722   | 4.71684    | 5.07723  |
| COG6      | 3.18204   | 3.33158   | 2.89597   | 3.4342    | 3.48563    | 4.15126  |
| COG7      | 2.57222   | 2.45671   | 2.7111    | 2.95875   | 2.59498    | 2.6097   |
| COG8      | 4.20065   | 4.19105   | 4.18828   | 4.35464   | 5.4404     | 5.16361  |
| COIL      | 3.90547   | 4.11646   | 3.51159   | 3.92169   | 4.43963    | 4.51363  |
| COL10A1   | 0.878411  | 1.20963   | 2.37108   | 2.4911    | 0.509706   | 0.270672 |
| COL11A1   | 9.24251   | 8.27531   | -2.48229  | -2.20128  | 8.33942    | 7.19378  |
| COL11A2   | 4.08881   | 2.8903    | -0.598354 | -0.649181 | -3.07415   | -5.69922 |
| COL12A1   | 7.87749   | 7.86717   | 8.66091   | 8.73024   | 7.52813    | 7.50778  |
| COL13A1   | 0.301026  | 0.850103  | -0.973801 | 0.020584  | 2.21315    | 1.87074  |
| COL14A1   | -2.17488  | -2.6546   | 2.10652   | 1.99449   | 5.38031    | 5.36808  |
| COL15A1   | 2.40946   | 2.05288   | -4.59508  | -6.09892  | -5.07051 ? |          |
| COL16A1   | 2.86126   | 2.59245   | 4.49419   | 4.72248   | 0.519683   | 0.90806  |
| COL18A1   | 4.18953   | 3.59035   | 5.62021   | 5.51843   | 5.23764    | 5.62541  |
| COL19A1   | 6.54646   | 6.45414   | -1.42826  | -1.93836  | 0.210164   | 0.832509 |
| COL1A1    | 0.0425183 | -0.604659 | 1.15638   | 0.563685  | 1.79093    | 1.77713  |
| COL1A2    | -1.1752   | -1.105    | 8.99297   | 8.66843   | 9.27245    | 9.19574  |

|             |            |           |          |           |            |           |
|-------------|------------|-----------|----------|-----------|------------|-----------|
| COL21A1     | -3.69722   | -3.13966  | -1.42826 | -4.10635  | 5.31373    | 5.60447   |
| COL22A1     | 4.29738    | 4.58496   | -3.37468 | -3.52222  | -6.64581   | -4.11926  |
| COL24A1     | -0.323873  | -0.531913 | -0.69145 | -0.786664 | 2.26748    | 1.2122    |
| COL27A1     | 4.87786    | 4.73067   | 4.32228  | 4.09941   | 2.15349    | 0.541297  |
| COL3A1      | -1.27248   | -1.60444  | 4.73011  | 1.23107   | -3.07415   | -5.69922  |
| COL4A1      | 6.20065    | 5.89634   | 5.45444  | 5.15326   | 5.63918    | 4.88667   |
| COL4A2      | 6.65418    | 6.47967   | 6.61857  | 6.40514   | 6.02289    | 5.56882   |
| COL4A3BP    | 4.97407    | 4.59513   | 4.50034  | 4.69126   | 4.555      | 4.52089   |
| COL4A4      | 1.60474    | 2.20606   | -3.01245 | -2.20128  | 0.983605   | 0.816919  |
| COL4A5      | 4.16588    | 4.53079   | 1.43857  | 0.57776   | 5.74191    | 5.77406   |
| COL4A6      | 4.76698    | 5.25952   | -1.65952 | -1.93836  | 4.1029     | 4.48926   |
| COL5A1      | -2.79121   | -1.93875  | 6.98646  | 6.64668   | 5.22042    | 4.82368   |
| COL5A2      | -0.0124477 | 0.292146  | 7.95649  | 7.96547   | 7.53678    | 7.58456   |
| COL5A3      | 4.47581    | 3.64944   | -5.1783  | -6.09892  | -6.64581 ? |           |
| COL6A1      | 4.53335    | 4.22103   | 7.00007  | 7.10146   | 4.98939    | 5.37808   |
| COL6A2      | 3.99091    | 3.58428   | 6.89147  | 6.88301   | 4.64517    | 4.91166   |
| COL6A3      | -1.94365   | 1.66647   | 11.8314  | 11.8295   | 1.79093    | 2.06809   |
| COL7A1      | 2.51282    | 2.22717   | 6.52234  | 6.66453   | 2.35372    | 1.99375   |
| COL8A1      | 7.95545    | 7.79373   | 6.94848  | 7.55006   | 3.4731     | 3.0041    |
| COL9A1      | 1.21983    | 1.30538 ? |          |           | -5.65305   | -4.70296  |
| COL9A2      | 1.90457    | 1.33161   | -3.85951 | -2.93781  | 0.0540566  | -0.848487 |
| COL9A3      | 5.40682    | 4.76956   | -2.48229 | -3.30006  | 3.21467    | 2.28766   |
| COLEC12     | -1.69862   | -1.25306  | 6.3818   | 6.7095    | -1.04532   | 0.0468961 |
| COLGALT1    | 6.802      | 6.63088   | 6.16496  | 6.37723   | 7.31509    | 7.23873   |
| COLGALT2    | 2.44814    | 2.6587    | 0.460428 | -0.327299 | 4.17889    | 3.70903   |
| COMMD1      | 2.92746    | 3.21771   | 2.7055   | 2.94135   | 3.40467    | 4.1775    |
| COMMD10     | 3.26815    | 3.30159   | 3.44219  | 3.82553   | 3.52457    | 4.23259   |
| COMMD2      | 3.76239    | 3.96969   | 3.96241  | 4.36792   | 4.68731    | 5.25617   |
| COMMD3      | 2.28773    | 2.63522   | 1.79278  | 2.40979   | 2.47649    | 3.59844   |
| COMMD3-BMI1 | 0.669789   | -0.916472 | -2.33217 | -1.03513  | 0.918928   | 2.50219   |
| COMMD4      | 4.76239    | 4.56298   | 4.35854  | 4.64939   | 4.22385    | 4.57868   |
| COMMD5      | 3.09281    | 3.08042   | 3.04573  | 3.28152   | 4.02768    | 4.77096   |
| COMMD6      | 2.94478    | 2.95712   | 2.91451  | 3.1858    | 3.82853    | 4.86219   |
| COMMD7      | 3.38972    | 3.24451   | 3.33218  | 3.74136   | 3.85439    | 4.04315   |
| COMMD8      | 2.75008    | 2.90348   | 2.08328  | 2.25313   | 3.88465    | 4.75373   |
| COMMD9      | 3.83425    | 3.73559   | 3.63666  | 4.06485   | 4.27116    | 4.4954    |
| COMT        | 4.07735    | 4.12023   | 4.20986  | 4.59161   | 4.5027     | 4.74655   |
| COPA        | 7.05247    | 7.07647   | 6.84268  | 7.44243   | 6.97376    | 7.13072   |
| COPB1       | 6.17724    | 6.33763   | 6.42527  | 7.01821   | 6.15133    | 6.66835   |
| COPB2       | 6.27838    | 6.33865   | 6.58074  | 7.13759   | 6.18401    | 6.63314   |
| COPE        | 4.00474    | 3.84321   | 3.58119  | 4.06735   | 4.84697    | 5.50942   |
| COPG1       | 5.58399    | 5.58941   | 5.95093  | 6.48028   | 6.00526    | 6.05315   |
| COPG2       | 4.01383    | 3.88353   | 3.49641  | 3.42354   | 3.80584    | 4.1291    |
| COPRS       | 4.22347    | 4.23673   | 4.0465   | 4.44673   | 4.62622    | 4.79402   |
| COPS2       | 5.77027    | 5.78742   | 5.10072  | 5.43324   | 5.94771    | 6.7214    |
| COPS3       | 4.70977    | 4.79099   | 4.90128  | 5.28509   | 5.65027    | 6.10865   |
| COPS4       | 3.69645    | 3.93163   | 3.606    | 4.14502   | 3.97177    | 5.19037   |
| COPS5       | 5.02508    | 5.05665   | 4.97182  | 5.25265   | 4.88812    | 5.39131   |
| COPS6       | 5.27567    | 5.35853   | 4.74277  | 5.11275   | 5.14099    | 5.40832   |
| COPS7A      | 4.04742    | 4.01794   | 3.70978  | 4.08716   | 4.45474    | 4.90431   |
| COPS7B      | 3.97812    | 4.02302   | 4.09801  | 4.29214   | 4.03412    | 3.95534   |
| COPS8       | 4.77294    | 4.84198   | 5.33927  | 5.69134   | 5.3638     | 5.77122   |

|           |           |           |           |           |            |            |
|-----------|-----------|-----------|-----------|-----------|------------|------------|
| COPS8P2   | 1.94417   | 2.04765   | 2.50101   | 2.87221   | 2.73087    | 3.26072    |
| COPZ1     | 5.62791   | 5.48297   | 5.51689   | 5.91805   | 5.25854    | 5.47443    |
| COPZ2     | -1.05494  | -0.508457 | 2.08328   | 2.52781   | -0.0308197 | 0.315752   |
| COQ10A    | 2.29883   | 2.33483   | 1.76733   | 1.98776   | 2.85539    | 2.84788    |
| COQ10B    | 3.60356   | 3.57058   | 3.27591   | 3.75845   | 4.4773     | 4.79113    |
| COQ2      | 2.55596   | 3.01289   | 2.05012   | 2.63938   | 2.86129    | 4.00753    |
| COQ3      | 1.50063   | 1.59788   | 1.12031   | 1.46107   | 2.54182    | 3.16057    |
| COQ4      | 3.48848   | 3.3499    | 3.47851   | 3.50811   | 3.58356    | 3.29784    |
| COQ5      | 2.85744   | 2.89251   | 2.67135   | 2.84246   | 2.69505    | 3.48558    |
| COQ6      | 2.63559   | 2.63131   | 2.08732   | 2.40727   | 2.61273    | 2.47915    |
| COQ7      | 2.78071   | 2.60056   | 2.53073   | 2.4799    | 3.00681    | 2.62421    |
| COQ9      | 3.55358   | 3.54559   | 4.15632   | 4.49571   | 5.57809    | 5.95192    |
| CORO1A    | 0.594214  | 0.239752  | 0.924062  | 0.95732   | -0.322491  | -0.0948509 |
| CORO1B    | 3.71877   | 3.29422   | 3.67134   | 4.07583   | 3.91144    | 4.48803    |
| CORO1C    | 6.09876   | 6.45768   | 6.19044   | 6.86953   | 6.4632     | 6.87731    |
| CORO2A    | 2.34806   | 2.54279   | 3.32229   | 3.52416   | -0.682812  | -0.0918635 |
| CORO7     | 2.17433   | 1.92519   | 1.78624   | 1.8683    | 1.94332    | 1.83221    |
| COTL1     | 7.27731   | 7.49269   | 5.33314   | 5.69571   | 6.00211    | 5.98893    |
| COX10     | 3.01101   | 2.7577    | 3.39387   | 3.3013    | 3.99361    | 3.79612    |
| COX10-AS1 | 2.28678   | 2.53998   | 3.27181   | 3.44768   | 3.15187    | 2.58331    |
| COX11     | 4.93896   | 5.05415   | 4.62022   | 4.88988   | 4.83191    | 4.95155    |
| COX11P1   | 0.274983  | 0.360499  | -0.218143 | 0.107166  | -0.109253  | 0.618079   |
| COX14     | 3.22993   | 3.19695   | 2.34397   | 2.68825   | 3.12082    | 3.98504    |
| COX15     | 4.66505   | 4.67222   | 5.04769   | 5.30849   | 5.25369    | 5.02883    |
| COX16     | 3.73322   | 3.80507   | 2.93456   | 3.22916   | 3.87125    | 5.08729    |
| COX17     | 2.60013   | 2.52288   | 2.42064   | 2.86245   | 3.05486    | 3.71437    |
| COX18     | 2.75626   | 2.81561   | 2.79948   | 2.88836   | 3.82954    | 4.26914    |
| COX19     | 2.39633   | 2.29206   | 2.89488   | 3.04915   | 2.86522    | 2.58588    |
| COX20     | 3.22503   | 3.58817   | 3.39189   | 3.8332    | 4.84463    | 5.70414    |
| COX20P1   | 0.20788   | 0.597612  | 0.304733  | 1.24624   | 1.84117    | 2.96291    |
| COX4I1    | 6.66149   | 6.59107   | 6.49154   | 6.8777    | 6.3924     | 6.79535    |
| COX5A     | 3.95196   | 3.92839   | 4.02715   | 4.50496   | 4.28585    | 4.76089    |
| COX5B     | 4.21003   | 4.23413   | 3.6976    | 4.18117   | 4.91146    | 6.00194    |
| COX6A1    | 5.1206    | 5.28472   | 4.65785   | 5.16061   | 5.33167    | 6.4023     |
| COX6A1P2  | 3.8861    | 4.06112   | 3.59821   | 3.9871    | 4.18333    | 4.85134    |
| COX6B1    | 4.64022   | 4.66061   | 4.60599   | 5.24487   | 5.85634    | 6.45689    |
| COX6C     | 4.44365   | 4.44778   | 4.84713   | 5.14442   | 4.99028    | 6.09982    |
| COX7A2    | 5.34086   | 5.43044   | 4.25319   | 4.70399   | 5.64859    | 6.95793    |
| COX7A2L   | 5.0031    | 4.97596   | 4.75386   | 5.17021   | 5.23678    | 6.03981    |
| COX7A2P2  | -0.159773 | 0.0291348 | -0.973801 | -0.459493 | 0.270529   | 1.28352    |
| COX7B     | 4.70978   | 4.73559   | 5.06142   | 5.59333   | 5.97654    | 7.13423    |
| COX7C     | 5.43777   | 5.40904   | 5.55732   | 6.04475   | 6.29889    | 7.46814    |
| COX7CP1   | 1.41066   | 1.50636   | 1.63087   | 2.08424   | 2.33539    | 3.28197    |
| COX8A     | 6.34462   | 6.28952   | 5.2856    | 5.85839   | 5.96059    | 6.34346    |
| CP        | 0.870132  | 0.142139  | 6.08954   | 5.90868   | 1.55084    | 0.752055   |
| CPA4      | 3.27963   | 3.2184    | 2.70218   | 3.85407   | 4.68009    | 6.10825    |
| CPA6      | -3.8896   | -2.87684  | -1.53926  | -0.716287 | 3.2645     | 3.9299     |
| CPD       | 6.80558   | 6.58719   | 7.35307   | 7.43694   | 7.10356    | 7.03811    |
| CPE       | 2.65408   | 2.02903   | 4.08794   | 3.89117   | 1.70604    | 1.67702    |
| CPEB1     | 3.02795   | 3.02211   | 2.04532   | 2.40651   | 1.02625    | 1.1637     |
| CPEB2     | 3.2449    | 3.26153   | 4.01974   | 4.27811   | 3.72007    | 3.78714    |
| CPEB3     | 1.00142   | 0.766044  | 0.597917  | 0.491176  | 1.81545    | 1.55071    |

|           |          |          |            |            |            |           |
|-----------|----------|----------|------------|------------|------------|-----------|
| CPEB4     | 3.96091  | 4.02499  | 4.78658    | 5.09696    | 5.08745    | 4.72165   |
| CPED1     | 3.97015  | 3.96652  | 4.15297    | 4.49015    | 0.848189   | 1.74453   |
| CPM       | 2.4456   | 2.48261  | -1.13882   | -0.860651  | -3.33694   | -4.11926  |
| CPNE1     | 5.99822  | 5.84681  | 5.81796    | 5.94162    | 5.42133    | 5.24427   |
| CPNE2     | 2.89898  | 2.48261  | 3.58466    | 3.31744    | 3.94331    | 3.05816   |
| CPNE3     | 5.63964  | 5.78299  | 5.42241    | 5.7875     | 6.47574    | 6.6514    |
| CPNE8     | 2.59785  | 2.91654  | 3.01124    | 3.43614    | -5.65305 ? |           |
| CPOX      | 4.4895   | 4.36845  | 4.07032    | 4.18579    | 3.74271    | 3.33221   |
| CPPED1    | 2.89339  | 2.60056  | 1.82213    | 1.76772 ?  | ?          |           |
| CPQ       | 1.71458  | 1.87703  | 2.26358    | 2.32998    | 3.57091    | 3.92627   |
| CPS1      | 4.12985  | 4.14456  | 4.87918    | 5.09636    | 4.16148    | 4.22992   |
| CPSF1     | 3.76546  | 3.50005  | 3.99763    | 4.07355    | 4.45926    | 4.05317   |
| CPSF2     | 5.97643  | 6.06584  | 5.02043    | 5.33463    | 6.03295    | 6.26303   |
| CPSF3     | 5.63712  | 5.53679  | 4.66667    | 5.02366    | 5.52336    | 5.86785   |
| CPSF3L    | 4.41577  | 4.20268  | 4.53671    | 4.75225    | 5.01504    | 4.83164   |
| CPSF4     | 4.05003  | 4.1774   | 3.92892    | 4.26403    | 3.89434    | 4.05981   |
| CPSF6     | 6.41565  | 6.43874  | 5.79266    | 5.8922     | 5.95966    | 5.74497   |
| CPSF7     | 5.3288   | 5.26847  | 5.15409    | 5.2176     | 4.88512    | 4.57868   |
| CPT1A     | 5.62229  | 5.99864  | 5.39955    | 6.01044    | 4.71362    | 5.22327   |
| CPT1B     | 3.18105  | 2.68077  | 2.27448    | 2.18043    | 0.859707   | -0.396253 |
| CPT1C     | 0.640852 | 0.980157 | 4.12253    | 4.3258     | 3.09958    | 3.15438   |
| CPT2      | 3.61629  | 3.54571  | 3.77183    | 4.0456     | 3.76374    | 3.75733   |
| CPTP      | 1.75628  | 1.60328  | 1.86635    | 2.15798    | 2.80934    | 2.91168   |
| CRACR2A   | 2.95018  | 2.81793  | -6.17309   | -4.10635 ? |            | -5.69922  |
| CRADD     | 0.171399 | -0.27286 | 0.597917   | 0.868521   | 1.89431    | 2.39133   |
| CRAMP1L   | 3.66711  | 3.62728  | 3.77511    | 3.88806    | 3.23871    | 2.93839   |
| CRAT      | 2.42506  | 2.22368  | 2.82771    | 3.12719    | 3.33687    | 3.64423   |
| CRBN      | 4.44479  | 4.47357  | 4.1141     | 4.27381    | 4.44876    | 4.97793   |
| CRCP      | 4.11561  | 4.20247  | 4.29151    | 4.77727    | 4.61789    | 4.80246   |
| CREB1     | 5.05747  | 5.2267   | 4.65489    | 4.83734    | 5.63946    | 5.54298   |
| CREB3     | 3.52863  | 3.75101  | 3.55928    | 4.26738    | 4.94745    | 5.59817   |
| CREB3L1   | -3.69722 | -3.65369 | 2.46395    | 2.76155    | -2.20023   | -2.00571  |
| CREB3L2   | 6.43026  | 6.45125  | 5.6795     | 5.69242    | 5.12148    | 4.91533   |
| CREB3L4   | 2.22457  | 1.89096  | 1.57555    | 1.49095    | 0.816837   | 1.25912   |
| CREB5     | 4.02968  | 4.09078  | 0.045429   | -0.250687  | 4.10786    | 3.71534   |
| CREBBP    | 4.65737  | 4.38029  | 5.1806     | 4.84245    | 4.397      | 4.07628   |
| CREBL2    | 4.4114   | 4.21311  | 4.34199    | 4.59766    | 4.12186    | 4.68667   |
| CREBRF    | 3.39236  | 3.13335  | 4.05965    | 4.25311    | 4.13085    | 4.31703   |
| CREBZF    | 4.9957   | 4.98114  | 6.34662    | 6.29231    | 5.82676    | 5.06807   |
| CREG1     | 4.70871  | 4.75328  | 4.0186     | 4.52688    | 2.07103    | 2.60618   |
| CRELD1    | 3.92297  | 3.61129  | 2.8193     | 2.9301     | 2.84352    | 2.40704   |
| CRELD2    | 4.53514  | 4.33075  | 4.20106    | 4.56118    | 2.45604    | 2.55069   |
| CREM      | 2.73138  | 3.01087  | 1.39395    | 1.80409    | 2.2734     | 2.96925   |
| CRHR1-IT1 | 2.78528  | 2.66787  | 2.32073    | 2.38119    | 3.08035    | 2.67675   |
| CRIM1     | 6.27365  | 6.5483   | 6.46819    | 6.97895    | 7.7842     | 7.71214   |
| CRIP2     | 2.21383  | 1.62465  | -0.0748604 | 0.367002   | 2.2526     | 2.54596   |
| CRIPAK    | 1.25516  | 1.06859  | 1.13846    | 0.786061   | 1.32842    | 1.0747    |
| CRIPT     | 3.41859  | 3.48598  | 2.25502    | 2.8224     | 3.69793    | 4.30631   |
| CRISPLD1  | 2.40684  | 2.26168  | 2.11112    | 0.924662   | 0.568587   | 0.541297  |
| CRISPLD2  | 1.17133  | 1.94232  | 5.3972     | 5.51092    | 2.28229    | 2.36476   |
| CRK       | 5.77404  | 5.88975  | 5.43071    | 5.76728    | 6.98032    | 6.95131   |
| CRKL      | 6.19781  | 6.1454   | 5.71469    | 5.90449    | 6.13511    | 5.60446   |

|            |           |           |           |           |           |          |
|------------|-----------|-----------|-----------|-----------|-----------|----------|
| CRLF1      | 1.39572   | 1.26761   | 1.42263   | 1.29788   | 2.23162   | 1.43022  |
| CRLF3      | 3.59326   | 3.21947   | 3.54444   | 3.48005   | 4.23025   | 3.7359   |
| CRLS1      | 4.00049   | 4.06852   | 4.07386   | 4.33307   | 4.26301   | 5.12932  |
| CRMP1      | 1.78142   | 1.97779   | 4.14096   | 4.5834    | 1.26329   | 0.805945 |
| CRNDE      | 1.68033   | 1.86361   | 2.27592   | 2.46104   | 1.39501   | 1.33772  |
| CRNKL1     | 5.1969    | 5.30116   | 4.64381   | 4.92184   | 4.48372   | 4.85839  |
| CROCC      | 1.65431   | 1.64688   | 1.89918   | 1.9267    | 1.58989   | 1.07503  |
| CROCCP2    | 1.24007   | 1.04785   | 1.07452   | 1.06737   | 0.894341  | 0.347246 |
| CROCCP3    | 2.23071   | 2.08075   | 2.69416   | 2.52177   | 1.87725   | 1.2068   |
| CROT       | 2.96092   | 3.04297   | 5.7037    | 6.05009   | 3.38544   | 3.94971  |
| CRTAP      | 7.28769   | 7.06325   | 6.88286   | 7.00161   | 7.22261   | 7.11066  |
| CRTC1      | 0.577131  | 0.0450795 | 0.956086  | 0.445854  | 0.983605  | 0.443129 |
| CRTC2      | 2.93392   | 2.65091   | 2.37874   | 2.8827    | 2.80934   | 2.76903  |
| CRTC3      | 3.67905   | 3.53715   | 3.72611   | 3.68215   | 3.29068   | 2.60163  |
| CRY1       | 3.55357   | 3.43651   | 3.02837   | 3.14384   | 2.78264   | 2.41742  |
| CRY2       | 2.48084   | 2.282     | 3.39391   | 3.38503   | 2.83755   | 1.95865  |
| CRYAB      | -2.89067  | -4.13839  | -4.18092  | -5.10387  | 5.55289   | 5.48995  |
| CRYBB2P1   | 2.34806   | 2.39826   | 2.62335   | 2.78286   | 2.55159   | 2.00755  |
| CRYBG3     | 5.48374   | 5.46167   | 6.77797   | 6.61995   | 5.5491    | 5.64709  |
| CRYGS      | -0.127589 | 0.017195  | 0.972862  | 1.01916   | 0.819513  | 0.625822 |
| CRYL1      | 1.7188    | 1.15192   | 0.045429  | -0.131403 | 2.1112    | 2.354    |
| CRYZ       | 4.42591   | 4.80673   | 3.27627   | 3.86621   | 4.44624   | 5.11103  |
| CRYZL1     | 2.68031   | 2.69198   | 3.84852   | 3.93008   | 2.85737   | 2.82077  |
| CS         | 6.43112   | 6.21039   | 5.78085   | 5.92338   | 6.25566   | 5.91339  |
| CSAD       | 1.34621   | 1.12152   | 2.24119   | 2.18501   | 1.95562   | 0.633217 |
| CSAG1      | 3.66099   | 3.66047   | -5.1783   | -6.09892  | 4.41964   | 4.75356  |
| CSAG3      | 1.54955   | 1.53364 ? | ?         |           | 1.64713   | 1.77276  |
| CSDAP1     | 2.90945   | 3.12109   | 2.11616   | 2.35264   | 2.29388   | 2.27074  |
| CSDE1      | 8.49143   | 8.15447   | 8.01147   | 8.03571   | 9.38305   | 9.2364   |
| CSE1L      | 7.75197   | 7.81502   | 7.01576   | 7.48001   | 7.02127   | 7.48926  |
| CSF1       | 4.53453   | 3.94972   | 7.30655   | 7.63082   | 6.26207   | 6.03936  |
| CSF1R      | -1.34118  | -1.29258  | -0.206089 | 0.231137  | 0.489522  | 1.24753  |
| CSGALNACT1 | 3.20631   | 3.08791   | 0.904002  | 1.0511    | -0.450672 | -1.4584  |
| CSGALNACT2 | 3.49075   | 3.669     | 3.00631   | 3.59161   | 4.50522   | 4.46195  |
| CSK        | 3.45952   | 3.2219    | 3.22799   | 3.31534   | 3.30548   | 3.19113  |
| CSMD2      | -6.68418  | -5.45651  | -1.86109  | -2.02079  | 1.32273   | 1.57872  |
| CSNK1A1    | 6.33509   | 6.44982   | 6.7962    | 7.21623   | 7.49591   | 7.61623  |
| CSNK1A1L   | 0.0165391 | 0.293712  | 0.699196  | 1.02677   | 1.25263   | 1.2124   |
| CSNK1A1P1  | -0.431686 | 0.0450795 | -0.228674 | 0.213652  | 0.848982  | 0.615671 |
| CSNK1D     | 4.90651   | 4.69433   | 5.27104   | 5.25706   | 6.29007   | 5.75165  |
| CSNK1E     | 5.18531   | 5.04472   | 4.97413   | 5.21761   | 5.02794   | 4.54003  |
| CSNK1G1    | 4.51857   | 4.63605   | 4.38992   | 4.63833   | 5.20326   | 5.21358  |
| CSNK1G2    | 3.92113   | 3.64568   | 3.77503   | 3.75381   | 4.5146    | 4.3634   |
| CSNK1G3    | 5.10343   | 5.04445   | 4.76337   | 4.76461   | 5.11117   | 5.28975  |
| CSNK2A1    | 5.91227   | 5.90021   | 6.01765   | 6.31561   | 5.77658   | 5.81218  |
| CSNK2A2    | 5.33261   | 5.37635   | 5.51561   | 5.66142   | 6.12452   | 5.93398  |
| CSNK2A3    | 5.20232   | 5.14766   | 5.18004   | 5.46755   | 4.97054   | 4.89921  |
| CSNK2B     | 5.07206   | 5.11381   | 4.95877   | 5.37195   | 5.93176   | 6.11457  |
| CSPG4      | 8.14721   | 8.31283   | -0.833889 | -0.580897 | -3.23558  | -2.01974 |
| CSPG4P10   | 2.66404   | 2.63303   | 2.66373   | 2.55966   | 2.20101   | 1.02112  |
| CSPG4P11   | 0.626925  | 0.508652  | 2.9288    | 2.83183   | 2.02318   | 1.51252  |
| CSPG4P12   | 2.91139   | 2.83304   | 3.53562   | 3.34023   | 2.79659   | 1.80826  |

|               |           |             |           |            |             |            |
|---------------|-----------|-------------|-----------|------------|-------------|------------|
| CSPP1         | 3.68495   | 3.68477     | 4.61803   | 4.46415    | 3.44622     | 3.32667    |
| CSRNP1        | 2.38839   | 2.61398     | 2.08796   | 2.52418    | 3.15348     | 3.00065    |
| CSRNP2        | 3.89056   | 3.91869     | 4.33118   | 4.52688    | 4.00857     | 3.91716    |
| CSRNP3        | 1.55835   | 1.87703     | -5.1783   | -4.52056   | 1.71041     | 2.29893    |
| CSRP1         | 6.25587   | 6.72785     | 5.7256    | 6.29496    | 7.6104      | 7.69948    |
| CSRP2         | 4.93571   | 4.74293     | 2.50649   | 2.5059     | 3.58524     | 3.23287    |
| CSRP2BP       | 4.03447   | 3.93274     | 3.79362   | 3.92464    | 3.35849     | 3.56125    |
| CST3          | 4.76032   | 4.78448     | 4.65568   | 5.10307    | 3.52828     | 3.90799    |
| CSTB          | 3.13381   | 3.00068     | 3.69606   | 4.20745    | 3.40981     | 3.82076    |
| CSTF1         | 5.12587   | 5.0821      | 4.66195   | 4.95659    | 5.31481     | 5.1782     |
| CSTF2         | 4.36837   | 4.5421      | 3.16742   | 3.69529    | 4.31697     | 4.4519     |
| CSTF2T        | 4.74023   | 4.89085     | 3.81366   | 4.16729    | 4.10869     | 4.08932    |
| CSTF3         | 4.66668   | 4.6024      | 3.75458   | 3.96297    | 4.82749     | 4.75943    |
| CTA-243E7.1   | -1.37679  | -1.60444    | 2.2131    | 1.69856    | -0.00196773 | -0.619042  |
| CTA-276F8.1   | 0.676033  | 0.570657    | 1.69915   | 1.36695    | -0.168309   | -1.18284   |
| CTA-276O3.4   | 0.983116  | 1.21132     | -0.846877 | -0.247406  | 0.970139    | 1.9049     |
| CTA-29F11.1   | 1.54889   | 1.49139     | 1.68687   | 1.86848    | 0.782702    | 0.816919   |
| CTA-363E19.2  | -0.255978 | 0.223769    | 0.460428  | 0.367002   | -0.136604   | -0.0341529 |
| CTA-384D8.36  | 0.639519  | 0.544901    | 0.0641517 | 0.414688   | -0.396793   | -0.971946  |
| CTA-390C10.10 | 0.595618  | 0.71714     | 0.996447  | 1.23107    | 0.976371    | 0.560157   |
| CTA-445C9.14  | 1.91933   | 2.12589     | 1.8772    | 2.12001    | 0.839605    | 1.08775    |
| CTA-941F9.10  | 3.76038   | 3.68499     | 3.88377   | 3.66816    | 2.59534     | 2.11501    |
| CTAGE5        | 3.22435   | 3.46426     | 2.54496   | 2.81713    | 3.04485     | 3.59877    |
| CTB-113P19.1  | -0.28777  | -0.312083   | 0.191765  | 0.249057   | 0.741782    | 0.15182    |
| CTB-119C2.1   | 1.06253   | 1.43806     | 0.386425  | 1.27492    | 0.437814    | -0.38461   |
| CTB-131B5.5   | 0.377835  | -0.58       | 1.5913    | 0.563685   | -0.393347   | -3.38329   |
| CTB-131K11.1  | 2.11472   | 2.45006     | 2.03082   | 2.29633    | 2.06081     | 2.44812    |
| CTB-13F3.1    | 1.9402    | 2.05827     | 3.32189   | 2.46762    | 0.0259785   | -0.865416  |
| CTB-152G17.6  | 2.10829   | 2.1445      | 2.33613   | 2.12481    | 2.0332      | 1.65964    |
| CTB-193M12.5  | 1.69756   | 1.68694     | 1.93025   | 2.08102    | 1.73203     | 1.55071    |
| CTB-25B13.12  | 1.16865   | 0.912037    | 1.0573    | 0.892243   | 1.75161     | 1.13183    |
| CTB-31O20.2   | 0.701877  | 0.71714     | -0.183372 | 0.46112    | 1.62974     | 1.55071    |
| CTB-33G10.1   | 1.35265   | 1.41051     | 0.566172  | 0.883644   | 1.85928     | 2.57216    |
| CTB-47B8.1    | 0.453639  | 0.239789    | -0.133342 | 0.28359    | 0.32848     | -0.0341529 |
| CTB-47B8.5    | 0.224213  | 0.445419    | -1.0649   | -0.598199  | 1.21673     | 0.351527   |
| CTB-50E14.5   | 1.32195   | 1.50966     | 2.15849   | 2.43334    | 2.11372     | 2.10802    |
| CTB-50L17.8   | -0.255098 | 0.0425743   | 0.276866  | 0.24715    | 0.389181    | -1.06148   |
| CTB-52I2.4    | 3.56552   | 3.34474     | 2.8403    | 3.14748    | 3.31078     | 2.86413    |
| CTB-55O6.12   | 0.983094  | 0.390767    | 0.659322  | 0.331877   | -0.0699046  | -1.67297   |
| CTB-58E17.1   | 1.10059   | 0.994428    | 0.505363  | 0.692909   | 0.0746287   | 0.468917   |
| CTB-63M22.1   | 5.02827   | 4.91613     | 4.00737   | 4.2684     | 5.00723     | 5.68061    |
| CTB-79E8.3    | 3.67103   | 3.60132     | 2.28002   | 2.4588     | 4.05262     | 4.17686    |
| CTB-89H12.4   | 5.09988   | 5.19898     | 5.98738   | 6.00609    | 6.15473     | 5.56741    |
| CTBP1         | 4.6712    | 4.51532     | 4.66937   | 4.70471    | 5.58342     | 5.48136    |
| CTBP1-AS      | 0.335049  | -0.00931374 | 0.522658  | 0.325893   | 0.708064    | -0.127297  |
| CTBP1-AS2     | 2.62666   | 2.38308     | 2.46075   | 2.24787    | 2.83525     | 2.41742    |
| CTBP2         | 5.31478   | 5.22327     | 5.34163   | 5.44605    | 5.53746     | 5.24853    |
| CTBP2P4       | -0.276553 | 0.133734    | -0.286035 | -0.0485211 | 0.202223    | 0.234943   |
| CTBP2P8       | 1.27837   | 1.22355     | -0.669052 | 0.325985   | 0.651353    | 0.587423   |
| CTBS          | 3.08169   | 3.19509     | 4.51045   | 4.54274    | 3.30151     | 3.50653    |
| CTC-205M6.5   | 0.399051  | 0.278722    | 1.12941   | 1.13916    | -0.682812   | -1.4584    |
| CTC-231O11.1  | 5.67105   | 5.74263     | 2.20451   | 3.23103    | -6.64581    | -4.70296   |

|               |            |            |            |            |            |            |
|---------------|------------|------------|------------|------------|------------|------------|
| CTC-260E6.2   | 3.37619    | 3.20568    | 2.69016    | 3.02345    | 4.34273    | 4.48259    |
| CTC-260E6.4   | 0.93349    | 0.829492   | 0.723899   | 0.423331 ? |            | -5.02576   |
| CTC-260E6.6   | 0.480917   | 0.237698   | 0.558032   | 0.476226   | -3.65763 ? |            |
| CTC-277H1.7   | 0.278306   | 0.137189   | 0.517004   | 0.445854   | -0.753191  | -1.70626   |
| CTC-308K20.3  | 3.11634    | 3.31078    | 2.38029    | 3.11805    | 3.50519    | 4.15794    |
| CTC-329H14.1  | 1.86397    | 2.01041    | 1.81651    | 2.36376    | 2.89724    | 2.58692    |
| CTC-338M12.4  | 1.09729    | 1.58872    | 1.85368    | 2.30004    | 1.22423    | 1.64158    |
| CTC-338M12.9  | 1.02208    | 1.06859    | -6.17309   | -6.09892 ? |            | ?          |
| CTC-343N3.1   | 2.44048    | 2.64569    | 2.39392    | 2.18121    | 1.20393    | 0.315752   |
| CTC-351M12.1  | 0.658554   | 0.955067   | 1.75315    | 1.32585    | 0.815493   | 0.668401   |
| CTC-359D24.3  | 1.31071    | 1.05335    | 0.846553   | 0.537038   | 1.45128    | 0.429375   |
| CTC-360J11.4  | 1.36705    | 1.40138    | 0.517004   | 0.892865   | 1.23456    | 0.668401   |
| CTC-425O23.5  | 1.13386    | 1.31199    | 1.6494     | 1.83957    | 1.83157    | 0.80115    |
| CTC-428H11.2  | 0.247745   | 0.570958   | 1.32385    | 1.38042    | 1.07005    | 0.749637   |
| CTC-429P9.3   | 1.03569    | 0.859151   | 1.02599    | 0.89124    | 1.72774    | 1.03481    |
| CTC-432M15.3  | -1.69717   | 0.613626   | -1.42715   | 0.22976    | -0.673145  | 1.18134    |
| CTC-435M10.3  | 1.93269    | 1.94662    | 2.40604    | 2.47928    | 2.8966     | 2.21173    |
| CTC-444N24.11 | 4.02373    | 4.16285    | 3.46753    | 3.99183    | 4.94747    | 4.74346    |
| CTC-444N24.7  | 2.82562    | 2.97743    | 2.46121    | 2.9091     | 3.5862     | 2.80879    |
| CTC-444N24.8  | 0.61388    | 0.344613   | 0.371169   | -0.108685  | 1.06767    | 0.126299   |
| CTC-459F4.1   | 0.440559   | 0.996642   | 2.02107    | 2.06112    | 2.2496     | 1.60621    |
| CTC-459F4.3   | 2.04322    | 2.17184    | 2.44538    | 2.72051    | 2.3739     | 2.70032    |
| CTC-471F3.5   | 1.06253    | 0.894767   | 1.46757    | 1.12963    | 1.58943    | 0.224139   |
| CTC-479C5.10  | 0.33867    | 0.343237   | 0.903069   | 0.745599   | 1.38672    | 0.812736   |
| CTC-479C5.12  | 1.47055    | 1.21716    | 2.61569    | 2.68263    | 2.4865     | 2.39231    |
| CTC-487M23.6  | 0.00148521 | 0.265185   | 0.386425   | 0.430424   | -0.10558   | -0.247123  |
| CTC-487M23.8  | 1.12523    | 0.99974    | 0.0369885  | 0.108023   | 0.887611   | 0.657814   |
| CTC-512J14.5  | 2.13945    | 2.01929    | 1.83938    | 2.40081    | 1.8548     | 2.21654    |
| CTC-524C5.2   | 1.64535    | 1.74465    | 1.8877     | 1.98714    | 2.54913    | 1.89194    |
| CTC-529P8.1   | 3.1417     | 4.14356    | -0.628724  | 0.591699   | -4.07293   | -2.70579   |
| CTC-534A2.2   | 1.20524    | 1.21485    | 0.783733   | 1.3614     | 1.72743    | 2.31955    |
| CTC-534B23.1  | 0.151794   | 0.307265   | -0.366833  | -0.869325  | 0.523983   | -0.154952  |
| CTC-575D19.1  | 4.82614    | 4.74321    | 4.25938    | 4.75791    | 5.39468    | 5.86553    |
| CTC1          | 3.22573    | 3.47232    | 2.693      | 3.10063    | 3.08621    | 2.85171    |
| CTCF          | 5.18472    | 5.17922    | 4.65016    | 4.75535    | 5.37207    | 5.28125    |
| CTD-2006C1.2  | 1.74604    | 1.50874    | 1.34214    | 1.39814    | 1.47209    | 1.23778    |
| CTD-2006C1.6  | 0.702409   | 0.429675   | 0.874577   | 0.79511    | -0.139374  | -0.096138  |
| CTD-2010I16.1 | -0.0842313 | 0.318612   | 0.431281   | 0.317536   | -0.356358  | -1.006     |
| CTD-2012J19.1 | 1.07725    | 1.13872    | 0.199462   | 0.161436   | 0.581997   | 1.02944    |
| CTD-2013N24.2 | 1.52282    | 1.71436    | 1.71058    | 1.69239    | 1.52877    | 0.91731    |
| CTD-2014D20.1 | 0.529821   | 0.137189   | 0.662041   | 0.605504   | 0.210164   | -0.706491  |
| CTD-2015B23.2 | 0.874836   | 1.26066    | 1.003      | 1.43313    | 2.15475    | 2.38679    |
| CTD-2015H6.3  | 0.520176   | 0.444137   | 0.571444   | 0.605504   | 1.43776    | 1.37014    |
| CTD-2017D11.1 | 1.2814     | 1.08788    | 2.52203    | 2.456      | 1.42898    | 0.942256   |
| CTD-2017D11.2 | 0.266817   | 0.305445   | 1.5714     | 1.31748    | 1.22238    | 0.597145   |
| CTD-2023N9.1  | 3.32744    | 3.67542    | -3.85951 ? |            | -6.64581 ? |            |
| CTD-2024I7.13 | 0.577131   | 0.697098   | 1.27595    | 0.968047   | -0.637731  | -0.0918635 |
| CTD-2026D20.3 | 1.45396    | 1.51552    | 0.316818   | 0.317964   | 0.437888   | 0.0610158  |
| CTD-2026K11.6 | 1.45578    | 1.5651     | -1.59814   | -1.52346   | -3.85089   | -5.69922   |
| CTD-2033A16.2 | 4.62874    | 4.42969    | 4.44858    | 4.39062    | 5.10739    | 4.55618    |
| CTD-2033D15.2 | 0.658554   | 0.988427   | 1.89865    | 1.90242    | 1.1211     | 0.315752   |
| CTD-2033D15.3 | -0.0582596 | 0.00502624 | 1.81471    | 1.72786    | 1.02244    | -0.203638  |



|                |            |           |            |            |            |            |
|----------------|------------|-----------|------------|------------|------------|------------|
| CTD-2033D24.2  | 0.292216   | 0.353673  | -0.370051  | 0.322344   | 0.234489   | 0.425867   |
| CTD-2047H16.4  | 1.83531    | 1.68825   | 2.32497    | 2.0658     | 1.63344    | 0.99917    |
| CTD-2083E4.4   | 0.494733   | 0.533583  | 0.221172   | 0.541654   | -0.143645  | -1.26908   |
| CTD-2083E4.5   | 1.79134    | 2.02879   | 1.4101     | 1.78533    | 1.49998    | 1.94616    |
| CTD-2090I13.2  | 1.02245    | 1.07681   | 0.893354   | 0.81069    | 1.46415    | 0.785207   |
| CTD-2114J12.1  | -2.65634   | -2.06994  | 1.85562    | 1.99613    | -0.664894  | -0.475455  |
| CTD-2116N17.1  | 0.733554   | 0.936078  | 1.12517    | 0.992667   | 1.02909    | 0.0136409  |
| CTD-2135D7.2   | 0.119396   | 0.160301  | 0.433376   | 0.846489   | -0.614682  | -0.515272  |
| CTD-2161E19.1  | 2.72312    | 2.75318   | 1.85303    | 2.31478    | 2.99705    | 3.43229    |
| CTD-2179L22.1  | -0.113985  | -0.513162 | 1.17408    | 0.833756   | -0.168804  | -1.19468   |
| CTD-2192J16.15 | 6.20767    | 6.0705    | 5.60073    | 6.04933    | 6.66546    | 7.33981    |
| CTD-2192J16.20 | 1.61568    | 1.36038   | 1.23143    | 1.04063    | 2.22884    | 1.4447     |
| CTD-2192J16.22 | 3.27275    | 3.19507   | 2.81067    | 3.23273    | 4.10616    | 3.94145    |
| CTD-2201E18.3  | 0.887556   | 0.868134  | 1.42128    | 1.48244    | 0.278187   | 0.541297   |
| CTD-2206G10.2  | 0.314151   | 0.459988  | -0.510905  | 0.00201836 | 0.0277769  | -0.0341529 |
| CTD-2207A17.1  | 1.51528    | 1.62465   | -6.17309 ? |            | -6.64581 ? |            |
| CTD-2207O23.3  | 0.922388   | 0.864596  | -0.01909   | 0.303775   | 1.38578    | 1.26279    |
| CTD-2228K2.7   | 1.82253    | 1.44204   | 3.17321    | 2.80934    | 1.10064    | 0.0456666  |
| CTD-2231E14.8  | 2.85453    | 2.81022   | 2.58907    | 3.0461     | 3.79417    | 3.81309    |
| CTD-2233K9.1   | 1.52496    | 1.37009   | 2.0549     | 1.70499    | 0.886652   | 0.359476   |
| CTD-2256P15.4  | 1.58835    | 1.63714   | 1.64639    | 1.88346    | 1.86558    | 2.23095    |
| CTD-2260A17.1  | -0.707105  | -0.523255 | 1.48065    | 1.16027    | 0.921886   | -0.303605  |
| CTD-2270N23.1  | 4.27199    | 3.9975    | 3.45977    | 3.92092    | 4.37136    | 4.86694    |
| CTD-2270P14.1  | 3.39306    | 3.14697   | 4.48812    | 4.46667    | 3.57483    | 3.13872    |
| CTD-2270P14.5  | 0.973406   | 0.868134  | 0.82777    | 0.913608   | -0.551587  | -0.38461   |
| CTD-2287O16.1  | 5.85673    | 5.79658   | 5.24951    | 5.64527    | 5.86255    | 7.1484     |
| CTD-2303H24.2  | -3.8896    | -3.85615  | 3.17251    | 3.17482    | 1.08887    | 0.146942   |
| CTD-2310F14.1  | 0.624279   | 0.265185  | 1.06807    | 0.61053    | 0.270529   | 0.102712   |
| CTD-2336O2.1   | 0.586404   | 0.223769  | 0.904002   | 1.195      | 0.894341   | 1.38079    |
| CTD-2336O2.3   | -0.550231  | -0.214764 | 1.44008    | 1.52878    | -0.377667  | 0.230781   |
| CTD-2349P21.3  | 1.40425    | 1.05291   | 2.33613    | 1.8912     | 1.45867    | 0.200291   |
| CTD-2353F22.2  | -1.38907   | -0.884905 | 0.971045   | 0.605504   | 1.58335    | 0.752791   |
| CTD-2366F13.1  | 1.20786    | 1.09945   | 1.35568    | 1.40691    | 0.549226   | 0.80115    |
| CTD-2368P22.1  | 1.57972    | 1.66211   | 0.541921   | 0.491176   | 1.23337    | -0.151977  |
| CTD-2369P2.12  | -0.0296396 | 1.02197   | 0.471292   | 0.622321   | 1.65364    | 1.29126    |
| CTD-2369P2.8   | 2.13333    | 2.19798   | -4.01161   | -3.85519   | -3.56111 ? |            |
| CTD-2371O3.3   | 1.26655    | 1.54812   | 0.782333   | 1.15801    | 0.121175   | 0.270672   |
| CTD-2373H9.3   | 0.0289651  | 0.237698  | 0.711372   | 0.659431   | 0.172692   | -0.348991  |
| CTD-2373N4.3   | 1.58636    | 1.03706   | 1.30837    | 0.902467   | -2.07475   | -2.38405   |
| CTD-2410N18.4  | 0.344033   | 0.320519  | 0.638445   | 0.740427   | 0.968998   | 0.444063   |
| CTD-2510F5.4   | 0.70496    | 0.295899  | 0.259532   | 0.80192    | 0.807363   | 1.15132    |
| CTD-2517M22.14 | 0.739027   | 0.207393  | 1.52388    | 0.884801   | 0.915016   | 0.288689   |
| CTD-2528L19.3  | 0.812211   | 1.21259   | -0.310912  | -0.347836  | 0.392691   | 0.921421   |
| CTD-2541J13.2  | 2.46567    | 1.96395   | 2.08712    | 1.21348    | 2.65042    | 3.55379    |
| CTD-2545G14.6  | 0.180224   | 0.0337507 | 0.706093   | 0.656661   | 1.54484    | 1.73892    |
| CTD-2545G14.7  | 2.16173    | 1.68506   | 2.41439    | 2.93968    | 3.58037    | 4.22783    |
| CTD-2545M3.2   | 0.0141839  | 0.290188  | -3.40079   | -2.9374    | 0.932409   | 1.11499    |
| CTD-2547G23.4  | 1.18971    | 1.24456   | 1.42385    | 1.25754    | 0.384182   | -0.214706  |
| CTD-2553L13.9  | 0.480917   | 0.305445  | 0.770744   | 0.46112    | -0.320293  | -0.536593  |
| CTD-2554C21.1  | 2.31795    | 2.44244   | 2.76139    | 2.98211    | 3.51667    | 3.41236    |
| CTD-2555O16.4  | 1.2969     | 1.21107   | 0.700324   | 0.558023   | 0.976136   | 0.939272   |
| CTD-2562J17.6  | -1.02638   | -1.29258  | 4.02104    | 3.74292    | -5.07051 ? |            |

|                |           |            |           |           |            |            |
|----------------|-----------|------------|-----------|-----------|------------|------------|
| CTD-2574D22.3  | 1.36705   | 1.38894    | 0.893354  | 0.978694  | 0.437814   | -0.4586    |
| CTD-2574D22.4  | 1.61117   | 1.71274    | 0.889949  | 1.35709   | 0.586059   | -0.0726769 |
| CTD-2576F9.1   | 1.18389   | 1.02489    | 0.642166  | 0.789245  | 1.47213    | 1.35747    |
| CTD-2583A14.11 | 0.564778  | 0.435437   | 0.137477  | 0.571395  | 0.995817   | 0.270134   |
| CTD-2587H24.14 | 0.0664543 | -0.252819  | 0.55155   | 0.460397  | -0.0525657 | -0.655794  |
| CTD-2587M2.1   | 0.61388   | 0.479758   | 0.956086  | 0.491176  | 1.37315    | 0.359476   |
| CTD-2600H12.2  | 0.701877  | 0.456112   | 1.48894   | 1.32585   | 1.67957    | 0.483199   |
| CTD-2619J13.14 | 1.63678   | 1.54694    | 1.74815   | 1.59004   | 1.65312    | 1.02411    |
| CTD-2619J13.17 | -0.395122 | -0.440295  | 0.849967  | 0.786061  | 1.2101     | 1.44307    |
| CTD-2619J13.8  | 0.179269  | 0.0488918  | 0.843325  | 0.864541  | -0.490053  | -1.62075   |
| CTD-2647E9.1   | -0.215699 | 0.0526524  | -0.280349 | 0.402449  | 0.726404   | 0.713379   |
| CTD-2651C21.3  | 0.41996   | 0.371157   | -0.227336 | 0.367002  | 1.07446    | 1.3814     |
| CTD-3014M21.1  | 3.37238   | 3.2219     | 1.81086   | 1.76157   | 2.06422    | 2.58332    |
| CTD-3035D6.1   | 2.86103   | 3.05038    | 2.21977   | 2.76123   | 4.11795    | 4.58582    |
| CTD-3035K23.3  | 0.733111  | 0.144777   | 1.68475   | 1.40065   | 0.770119   | 0.659988   |
| CTD-3074O7.5   | 0.265977  | 0.377213   | 0.307137  | 0.413128  | -0.406989  | -0.528471  |
| CTD-3092A11.2  | 0.743937  | 0.938098   | 2.05967   | 2.32582   | 1.10129    | -0.536593  |
| CTD-3099C6.9   | 3.55713   | 3.6019     | 3.34396   | 3.22657   | 2.78885    | 2.27058    |
| CTD-3113P16.11 | 0.662926  | 0.666811   | 0.568052  | 0.944169  | 1.02014    | 1.06999    |
| CTD-3131K8.2   | 0.504651  | 0.527341   | 0.139417  | 0.537902  | 0.698405   | -0.457255  |
| CTD-3138B18.5  | 1.94278   | 1.9954     | 1.877     | 1.73268   | 2.83049    | 2.13733    |
| CTD-3184A7.4   | 0.855575  | 0.804012   | 0.445928  | 0.520618  | -0.0163223 | 0.578775   |
| CTD-3185P2.1   | 0.798897  | 0.919065   | 0.392768  | 1.09628   | 0.987888   | 0.405154   |
| CTD-3193O13.12 | 1.53084   | 1.3164     | 0.672724  | 0.713177  | -0.368728  | -0.198091  |
| CTD-3222D19.8  | 0.587682  | 0.536033   | 0.441005  | 0.31919   | 0.944971   | 0.540672   |
| CTD-3252C9.4   | 2.69753   | 3.037      | 1.89865   | 2.42257   | 2.88852    | 2.36476    |
| CTD-3253I12.1  | 1.26097   | 1.554      | -0.482896 | -0.751045 | -3.19956   | -2.70579   |
| CTDNEP1        | 3.41738   | 3.24463    | 3.746     | 3.65871   | 4.11801    | 4.17613    |
| CTDP1          | 3.2287    | 3.26507    | 2.24275   | 2.82487   | 1.99792    | 1.6062     |
| CTDSP1         | 4.06959   | 4.00578    | 4.27283   | 4.54132   | 4.08031    | 4.25618    |
| CTDSP2         | 5.05037   | 4.82482    | 5.65486   | 5.79202   | 4.79962    | 4.37941    |
| CTDSPL         | 5.33017   | 5.37516    | 3.72786   | 4.05858   | 4.32409    | 4.26051    |
| CTDSPL2        | 5.44158   | 5.26949    | 4.98692   | 4.89042   | 5.45035    | 5.53606    |
| CTGF           | 5.43469   | 5.33683    | 4.36914   | 4.61823   | 7.246      | 7.05649    |
| CTH            | 0.409538  | 0.7564     | 1.19157   | 2.04094   | 0.723471   | 1.08775    |
| CTHRC1         | 6.03791   | 6.40922    | -0.428455 | -0.086319 | 0.36215    | 0.315752   |
| CTIF           | 3.79677   | 3.52868    | 3.74277   | 3.8584    | 1.85147    | 1.71117    |
| CTNNA1         | 8.5399    | 8.39745    | 7.40377   | 7.81272   | 7.18551    | 7.09502    |
| CTNNAL1        | 5.27138   | 5.24016    | 4.60519   | 5.452     | 5.2031     | 5.69577    |
| CTNNAPI        | 2.63765   | 2.86288    | 1.60167   | 2.12072   | 1.61884    | 1.28064    |
| CTNNB1         | 8.24789   | 8.12222    | 7.51015   | 7.65765   | 8.59091    | 8.68295    |
| CTNNBIP1       | 3.76955   | 3.67286    | 2.68993   | 2.68234   | 1.55404    | 1.22407    |
| CTNNBL1        | 4.77107   | 4.76224    | 4.41079   | 4.70491   | 4.45014    | 4.41482    |
| CTNND1         | 6.02031   | 6.01267    | 6.13994   | 6.26869   | 6.10016    | 6.00494    |
| CTNND2         | -5.10914  | -6.45019 ? |           | -6.09892  | 4.18596    | 3.0178     |
| CTNS           | 3.23313   | 2.82025    | 3.01124   | 2.99447   | 3.39632    | 2.92265    |
| CTPS1          | 5.54111   | 5.51084    | 5.43623   | 5.73744   | 5.66697    | 5.48804    |
| CTPS2          | 2.49076   | 2.42591    | 2.82492   | 2.63265   | 2.56611    | 2.56008    |
| CTR9           | 5.13516   | 5.21197    | 4.92909   | 5.25764   | 5.04459    | 5.18667    |
| CTSA           | 6.86404   | 6.76832    | 6.11577   | 6.43792   | 5.72593    | 5.68735    |
| CTSB           | 6.38024   | 6.39047    | 7.40942   | 7.80332   | 7.1088     | 7.24948    |
| CTSC           | 6.93624   | 6.58466    | 4.26252   | 4.38001   | 6.57824    | 6.84403    |

|           |           |            |           |           |            |            |
|-----------|-----------|------------|-----------|-----------|------------|------------|
| CTSD      | 5.72428   | 5.6161     | 7.92761   | 8.35077   | 7.65114    | 8.001      |
| CTSF      | 4.83522   | 4.6378     | 4.26871   | 4.31428   | 1.57813    | 1.42261    |
| CTSH      | 0.0559314 | -0.0703908 | 2.18718   | 2.31745   | 0.969108   | 1.08775    |
| CTSK      | 3.28961   | 3.12587    | 0.292311  | 0.761609  | 0.969108   | 0.270672   |
| CTSL      | 5.04576   | 5.15185    | 4.676     | 5.40145   | 4.9822     | 5.65138    |
| CTSO      | 1.12752   | 1.33161    | 3.84852   | 4.00881   | 1.29393    | 1.80902    |
| CTSS      | 5.08799   | 5.68626    | 5.22745   | 6.10882   | -0.0163223 | 1.12623    |
| CTSV      | 2.22575   | 1.93806    | 0.0645242 | -0.493928 | -1.80184   | -1.18284   |
| CTSZ      | -2.9975   | -2.87684   | 4.00754   | 4.29311   | 3.61232    | 3.63536    |
| CTTN      | 7.34386   | 7.28868    | 6.66451   | 6.94832   | 6.84974    | 6.70424    |
| CTTNBP2   | -6.68418  | -4.87366   | 3.67445   | 2.99709 ? | ?          |            |
| CTTNBP2NL | 4.71295   | 4.81791    | 4.16962   | 4.62249   | 5.34107    | 5.43219    |
| CTU2      | 1.96608   | 1.77066    | 1.67688   | 2.29542   | 1.86225    | 2.27629    |
| CUBN      | 2.89711   | 2.1408     | -1.42826  | -0.616766 | 2.92653    | 2.52212    |
| CUEDC1    | 4.60983   | 4.49932    | 4.47736   | 4.57064   | 5.75014    | 5.65028    |
| CUEDC2    | 2.94838   | 2.80395    | 3.6109    | 3.81301   | 3.39497    | 3.75066    |
| CUL1      | 5.98106   | 5.92697    | 5.30259   | 5.6306    | 5.86215    | 5.92424    |
| CUL1P1    | 0.0438764 | 0.468969   | -0.158539 | 0.140255  | 0.186196   | -0.0621585 |
| CUL2      | 4.59726   | 4.65738    | 4.23538   | 4.68151   | 4.5424     | 4.86219    |
| CUL3      | 5.43974   | 5.34339    | 5.67381   | 5.74544   | 6.03004    | 6.01379    |
| CUL4A     | 5.17118   | 5.27607    | 5.14766   | 5.61199   | 5.56172    | 5.64545    |
| CUL4B     | 4.33847   | 4.26847    | 5.51212   | 5.92906   | 6.78431    | 7.18085    |
| CUL5      | 3.2191    | 3.34075    | 5.06904   | 5.21781   | 5.01275    | 5.39185    |
| CUL7      | 3.8782    | 3.74313    | 4.13375   | 4.03747   | 4.08278    | 4.26947    |
| CUL9      | 3.94638   | 3.90667    | 4.0124    | 4.09818   | 4.65483    | 4.51487    |
| CUTA      | 4.99658   | 4.71082    | 4.87986   | 5.15443   | 5.84995    | 5.89968    |
| CUTC      | 2.38586   | 2.32564    | 2.74144   | 2.96813   | 3.24388    | 3.16365    |
| CUX1      | 5.67188   | 4.98681    | 4.87175   | 4.53322   | 4.5745     | 3.971      |
| CWC15     | 3.31354   | 3.47527    | 4.0644    | 4.27811   | 4.24731    | 4.64753    |
| CWC22     | 4.30652   | 4.37082    | 4.53501   | 4.65935   | 4.72877    | 5.19114    |
| CWC25     | 3.83424   | 3.46493    | 3.80799   | 3.84391   | 4.07946    | 3.30172    |
| CWC27     | 3.49814   | 3.48552    | 3.9713    | 4.13077   | 4.17417    | 4.31427    |
| CWF19L1   | 3.9795    | 4.02124    | 3.53168   | 3.92039   | 3.8098     | 4.34138    |
| CWF19L2   | 2.14329   | 2.25142    | 3.54099   | 3.70817   | 3.62626    | 4.02968    |
| CX3CL1    | 1.399     | 1.74175    | 0.935482  | 1.17662   | 2.41652    | 2.54596    |
| CXADR     | 2.39325   | 2.47954    | 2.60036   | 3.00013   | 4.45918    | 4.39397    |
| CXCL1     | 6.94187   | 6.9476     | -3.85951  | -4.10635  | -2.33767   | -2.00571   |
| CXCL12    | ?         | -3.65369   | 6.0103    | 6.14826   | -6.64581   | -5.69922   |
| CXCL16    | 0.0559314 | 0.548466   | 0.340141  | 1.02051   | 0.587701   | 0.100762   |
| CXCL3     | 2.40422   | 2.79691    | 0.610974  | 2.17196   | -0.510371  | 0.200291   |
| CXCL8     | 8.45248   | 8.49613    | 3.59126   | 5.45769   | 1.22238    | 3.71113    |
| CXCR6     | 1.43539   | 1.15192    | 1.46757   | 1.14862   | 0.740643   | 0.200291   |
| CXXC1     | 4.39895   | 4.23412    | 2.85814   | 3.21985   | 2.67285    | 2.69417    |
| CXXC5     | 2.98743   | 2.58429    | 4.15186   | 4.58378   | 5.06803    | 5.15979    |
| CXorf23   | 1.91933   | 1.81331    | 2.85814   | 2.84828   | 1.90577    | 2.18205    |
| CXorf38   | 3.53694   | 3.69703    | 4.20125   | 4.56976   | 3.3241     | 3.27057    |
| CXorf40A  | 1.99325   | 1.89917    | 2.02365   | 2.34682   | 2.96451    | 3.39237    |
| CXorf40B  | 2.93936   | 2.84826    | 2.86436   | 3.22686   | 3.57503    | 4.03525    |
| CXorf56   | 3.67293   | 3.61591    | 3.51542   | 4.05362   | 4.30108    | 4.52122    |
| CXorf57   | 2.72299   | 2.69451    | -3.85951  | -3.78492  | -0.959604  | -1.31405   |
| CYB561    | 4.34532   | 4.1491     | 5.05068   | 5.28241   | 5.38202    | 5.49418    |
| CYB561A3  | 3.84973   | 3.9719     | 4.38418   | 4.83381   | 3.91565    | 4.35389    |

|            |           |            |           |            |            |            |
|------------|-----------|------------|-----------|------------|------------|------------|
| CYB561D1   | 3.079     | 3.02299    | 2.56468   | 2.80706    | 3.3909     | 3.23287    |
| CYB561D2   | 3.15387   | 3.07843    | 2.35891   | 2.83899    | 3.44802    | 3.89698    |
| CYB5A      | 3.55122   | 3.56783    | 4.50384   | 4.88524    | 2.08454    | 2.20019    |
| CYB5B      | 5.80695   | 5.71829    | 6.48889   | 6.68193    | 6.72203    | 6.75219    |
| CYB5D1     | 3.18405   | 3.01956    | 3.32861   | 3.46621    | 3.74791    | 3.41391    |
| CYB5D2     | 2.06581   | 1.64571    | 3.21736   | 3.30691    | 2.84749    | 2.76497    |
| CYB5R1     | 3.8622    | 4.02599    | 4.56718   | 4.96666    | 4.29825    | 4.54596    |
| CYB5R2     | 5.35245   | 5.63188    | -3.59683  | -2.64851   | -0.302594  | 0.224139   |
| CYB5R3     | 4.12029   | 4.13799    | 3.91976   | 4.28603    | 3.47798    | 3.54122    |
| CYB5R4     | 4.17897   | 4.16468    | 3.34591   | 3.64439    | 4.69172    | 5.33629    |
| CYB5RL     | 2.28026   | 2.10543    | 2.605     | 2.79832    | 2.57025    | 2.48079    |
| CYBRD1     | 5.49259   | 5.34652    | 6.11973   | 6.56692    | 5.87231    | 6.66181    |
| CYC1       | 4.87741   | 4.95077    | 4.93734   | 5.52689    | 5.53904    | 6.01694    |
| CYCS       | 6.45306   | 6.62713    | 6.11187   | 6.87523    | 6.82297    | 7.14526    |
| CYFIP1     | 6.03904   | 6.04829    | 5.70408   | 5.90249    | 6.20995    | 6.06848    |
| CYFIP2     | 3.24116   | 3.49715    | -3.01245  | -2.10822   | 2.48945    | 2.42773    |
| CYHR1      | 3.24324   | 3.00476    | 4.00872   | 4.03164    | 3.72654    | 3.6856     |
| CYLD       | 4.5225    | 4.58018    | 5.36046   | 5.72129    | 5.22614    | 5.40767    |
| CYP19A1    | 1.05586   | 1.35738    | -0.935332 | 0.120113   | -1.45047   | -0.95156   |
| CYP1A1     | -0.306598 | -0.58      | 1.08332   | 1.46107 ?  |            | ?          |
| CYP1B1     | 3.07817   | 3.4947     | 3.69795   | 4.14096    | 0.477947   | 0.688261   |
| CYP1B1-AS1 | 2.36587   | 2.26563    | -0.274798 | -0.117232  | -2.70408   | -2.43731   |
| CYP20A1    | 3.34395   | 3.33805    | 2.87176   | 3.18809    | 3.90097    | 4.02968    |
| CYP26B1    | 2.55832   | 1.67161    | 0.82777   | 1.2041     | -3.6585    | -2.8983    |
| CYP27A1    | -0.590352 | -0.629746  | 0.53081   | 1.04098    | 4.0803     | 3.95327    |
| CYP27C1    | 0.768595  | 0.877069   | 1.37876   | 1.02051    | -0.729347  | -0.848487  |
| CYP2J2     | 2.61835   | 3.27525    | -3.59683  | -2.20128   | -4.65668   | -2.70579   |
| CYP2R1     | 2.76853   | 2.61665    | 2.49948   | 2.32582    | -0.0752099 | -0.0918635 |
| CYP2S1     | -4.69535  | -4.45968   | 3.07151   | 3.66431 ?  |            | -5.69922   |
| CYP2U1     | 3.35447   | 3.7021     | 2.88543   | 3.5178     | 2.20065    | 3.10054    |
| CYP39A1    | -2.17488  | -1.60444   | 2.35952   | 3.07357    | -6.64581 ? |            |
| CYP3A5     | 0.908021  | 1.15925    | 1.15638   | 1.39082    | 0.878914   | 0.315752   |
| CYP4F11    | ?         | -4.87366   | 4.60193   | 4.92322 ?  |            | -5.69922   |
| CYP4V2     | 2.44039   | 2.88146    | 3.74573   | 4.16147    | 1.83933    | 1.81678    |
| CYP51A1    | 7.21746   | 7.31448    | 4.95833   | 5.25443    | 6.253      | 6.59164    |
| CYP51A1P1  | 3.45435   | 3.57818    | 1.33909   | 1.61553    | 2.51567    | 2.75022    |
| CYP51A1P2  | 4.41212   | 4.49035    | 2.11783   | 2.33268    | 3.28859    | 3.82494    |
| CYP7B1     | 3.03733   | 2.57334    | -3.85951  | -5.10387 ? |            | ?          |
| CYR61      | 4.74954   | 5.04397    | 6.76239   | 7.12808    | 6.44361    | 6.30279    |
| CYSTM1     | 3.00829   | 3.01694    | 1.54443   | 1.81006    | 3.35789    | 3.91167    |
| CYTH1      | 4.34257   | 4.09652    | 4.05488   | 3.97465    | 4.45213    | 3.63091    |
| CYTH2      | 4.09126   | 4.06462    | 4.67444   | 4.73979    | 5.07269    | 4.7424     |
| CYTH3      | 4.15965   | 4.32991    | 3.96369   | 4.25201    | 5.56554    | 5.09984    |
| CYTL1      | 2.49322   | 2.85005    | 2.31634   | 2.96532 ?  |            | ?          |
| D2HGDH     | 2.01519   | 1.75633    | 2.50299   | 2.32357    | 1.56789    | 1.59704    |
| DAAM1      | 3.78272   | 3.70331    | 3.1474    | 3.13197    | 3.64004    | 3.42771    |
| DAAM2      | 4.33097   | 3.98566    | 2.58603   | 2.93384    | -2.47153   | -3.01119   |
| DAB1       | 1.36705   | 0.736899   | -6.14047  | -6.09892 ? |            | ?          |
| DAB2       | 3.13064   | 3.15921    | 4.31232   | 4.66596    | 3.88078    | 4.14347    |
| DAB2IP     | 2.92846   | 2.92517    | 2.20881   | 2.30058    | 2.93215    | 2.91534    |
| DACH1      | -0.891472 | -0.81875 ? |           | -6.09892   | 3.74375    | 3.65523    |
| DACT1      | 2.98567   | 2.69703    | -3.85951  | -3.10759   | 3.54304    | 2.79712    |

|          |           |           |           |           |           |           |
|----------|-----------|-----------|-----------|-----------|-----------|-----------|
| DAD1     | 4.92206   | 4.94282   | 4.59209   | 4.87558   | 4.97767   | 5.69361   |
| DAG1     | 8.02704   | 8.09093   | 6.41311   | 6.50358   | 7.45489   | 6.92376   |
| DAGLA    | 1.84784   | 1.64571   | -0.628724 | -0.301309 | 1.78489   | 1.65964   |
| DAGLB    | 3.5225    | 3.4738    | 3.87311   | 4.09084   | 3.4125    | 3.06478   |
| DALRD3   | 2.54594   | 2.73823   | 2.2442    | 2.63384   | 3.62769   | 3.99462   |
| DANCR    | 4.49797   | 4.2304    | 2.22307   | 2.1661    | 5.39362   | 5.31605   |
| DANT2    | 0.133932  | 0.265185  | 2.01617   | 2.04601   | 1.19149   | 1.37014   |
| DAP      | 5.04069   | 4.90073   | 4.93281   | 5.20858   | 5.00812   | 5.36742   |
| DAP3     | 5.86898   | 5.97692   | 5.21742   | 5.73929   | 5.58672   | 5.96987   |
| DAP3P2   | 0.0268425 | 0.692998  | -0.226966 | 0.495245  | 0.122381  | -0.166598 |
| DAPK1    | -0.840854 | -0.907998 | 0.242852  | 1.61913   | -0.152369 | -2.53597  |
| DAPK2    | 0.377835  | 0.305445  | 1.68687   | 1.01017   | 3.4298    | 3.23873   |
| DAPK3    | 3.30935   | 3.05088   | 2.541     | 2.98657   | 4.44821   | 4.39526   |
| DARS     | 4.92408   | 4.88073   | 4.34075   | 4.64309   | 5.93629   | 6.16834   |
| DARS-AS1 | -0.262961 | -0.434432 | 0.143184  | 0.0916931 | 1.25305   | 0.64667   |
| DARS2    | 5.86789   | 5.92165   | 4.47556   | 4.70174   | 4.56368   | 4.79512   |
| DAXX     | 4.98566   | 4.96185   | 4.15298   | 4.49201   | 5.46283   | 5.35059   |
| DAZAP1   | 5.25      | 5.131     | 4.59865   | 4.68233   | 5.52735   | 5.40702   |
| DAZAP2   | 4.64358   | 5.68101   | 4.31597   | 5.53191   | 4.31338   | 5.89175   |
| DBF4     | 4.87577   | 4.98285   | 4.94958   | 5.37168   | 4.6786    | 5.17014   |
| DBF4B    | 3.12906   | 3.35094   | 3.48536   | 3.80107   | 3.12596   | 2.63315   |
| DBF4P1   | 2.66963   | 2.92388   | 2.77618   | 3.21796   | 2.62935   | 3.30828   |
| DBI      | 6.12666   | 6.10313   | 5.6129    | 5.98756   | 5.85217   | 6.75685   |
| DBIP1    | 1.15895   | 1.37122   | 0.723445  | 1.24877   | 0.89493   | 1.43288   |
| DBN1     | 4.54231   | 4.10035   | 5.67872   | 5.66554   | 4.96586   | 4.82467   |
| DBNDD1   | 4.75623   | 4.54418   | 1.31637   | 1.38307   | 3.79398   | 3.3073    |
| DBNDD2   | 2.59661   | 2.61053   | 1.10815   | 1.20709   | 2.38496   | 2.60894   |
| DBNL     | 5.89574   | 5.76639   | 6.30757   | 6.54146   | 6.14044   | 6.24162   |
| DBP      | 1.3139    | 1.0965    | 2.62289   | 2.32275   | 2.26924   | 2.13915   |
| DBR1     | 2.91011   | 2.9187    | 2.47827   | 2.9052    | 2.78471   | 3.10386   |
| DBT      | 3.88023   | 3.80978   | 4.10072   | 4.2867    | 4.46121   | 4.5197    |
| DCAF10   | 3.94747   | 3.93802   | 4.12253   | 4.23103   | 5.22309   | 5.08932   |
| DCAF11   | 3.88494   | 3.72569   | 3.1828    | 3.52561   | 4.69211   | 4.84686   |
| DCAF12   | 4.24269   | 4.41213   | 3.7113    | 4.13672   | 5.5882    | 6.08403   |
| DCAF13   | 5.43751   | 5.61454   | 4.91201   | 5.51124   | 6.12688   | 7.01025   |
| DCAF13P1 | 0.777275  | 1.10354   | 0.310852  | 1.03078   | 1.49151   | 2.26987   |
| DCAF13P3 | 1.17857   | 1.23879   | 0.713801  | 1.05187   | 1.83211   | 2.13154   |
| DCAF15   | 2.04481   | 1.77961   | 1.85652   | 2.10605   | 2.38098   | 2.14582   |
| DCAF16   | 5.12507   | 5.04197   | 4.472     | 4.61397   | 5.53474   | 5.08851   |
| DCAF17   | 3.70393   | 3.79219   | 3.32823   | 3.45341   | 3.554     | 3.73416   |
| DCAF4    | 3.1417    | 2.69956   | 1.15638   | 1.03078   | 1.09463   | 0.33778   |
| DCAF4L1  | -0.129081 | -0.105152 | -1.59814  | -1.46458  | 1.13416   | 0.401903  |
| DCAF5    | 4.24562   | 4.05678   | 4.44856   | 4.41767   | 4.58166   | 4.16673   |
| DCAF6    | 5.04826   | 5.06632   | 4.76705   | 5.03693   | 5.31245   | 5.57561   |
| DCAF7    | 6.08738   | 6.031     | 5.99948   | 6.16496   | 6.92215   | 6.85099   |
| DCAF8    | 5.59046   | 5.53934   | 5.50804   | 5.71959   | 6.03843   | 6.07004   |
| DCAKD    | 2.25222   | 1.9035    | 3.31433   | 3.44385   | 3.7169    | 3.26195   |
| DCBLD1   | 4.24036   | 4.10851   | 3.59852   | 3.87844   | 5.04153   | 5.03749   |
| DCBLD2   | 8.0126    | 8.2269    | 7.8233    | 8.21034   | 10.1726   | 10.4402   |
| DCC      | 2.52975   | 2.68182   | -5.1783   | -4.10635  | -6.64581  | -4.11926  |
| DCHS1    | 3.14798   | 2.68437   | 1.54444   | 0.476226  | -5.07051  | -4.70296  |
| DCHS2    | 1.72817   | 1.85096   | -1.23379  | -0.9805   | -2.85191  | -2.64707  |

|         |          |          |          |          |          |           |
|---------|----------|----------|----------|----------|----------|-----------|
| DCK     | 3.64855  | 3.93804  | 3.12481  | 3.49851  | 4.26376  | 4.76496   |
| DCLK1   | -1.05494 | -1.65505 | -1.48269 | -1.35358 | 4.44493  | 4.83437   |
| DCLK2   | 0.520176 | 0.955067 | 2.60439  | 2.99184  | 1.99435  | 1.493     |
| DCLRE1A | 3.98391  | 4.03799  | 3.5697   | 3.80706  | 4.03578  | 4.55537   |
| DCLRE1B | 3.62734  | 3.72821  | 3.16742  | 3.52961  | 3.29244  | 3.17593   |
| DCLRE1C | 3.15009  | 3.2835   | 3.20768  | 3.27592  | 2.8752   | 2.83514   |
| DCP1A   | 4.74333  | 4.63517  | 4.11797  | 4.32683  | 4.83254  | 4.61633   |
| DCP1B   | 2.02204  | 2.13709  | 2.42751  | 2.62928  | 1.5246   | 1.66836   |
| DCP2    | 6.71442  | 6.60188  | 6.64893  | 6.70074  | 6.88901  | 6.88405   |
| DCPS    | 3.81958  | 3.92302  | 2.27182  | 2.64273  | 3.30259  | 3.38869   |
| DCTD    | 4.52252  | 4.59174  | 4.1065   | 4.70655  | 4.61986  | 4.76088   |
| DCTN1   | 6.37943  | 6.37569  | 6.25381  | 6.4491   | 6.20399  | 6.1612    |
| DCTN2   | 4.23387  | 4.2574   | 4.938    | 5.40489  | 4.74375  | 5.05067   |
| DCTN3   | 3.15579  | 3.16469  | 3.3302   | 3.69207  | 4.6588   | 5.06146   |
| DCTN4   | 4.92981  | 4.88088  | 5.17182  | 5.44719  | 5.7424   | 5.72636   |
| DCTN5   | 5.80249  | 5.95312  | 5.702    | 5.99113  | 5.97924  | 6.44934   |
| DCTN6   | 3.21326  | 3.39254  | 2.96311  | 3.55058  | 3.4953   | 3.741     |
| DCTPP1  | 3.66926  | 3.53096  | 3.00759  | 3.46956  | 4.06029  | 4.53901   |
| DCUN1D1 | 4.98244  | 5.18447  | 5.12749  | 5.28876  | 5.81625  | 6.12803   |
| DCUN1D2 | 2.74801  | 2.71243  | 3.29625  | 3.39897  | 2.97813  | 2.45317   |
| DCUN1D3 | 3.35092  | 3.56675  | 3.75523  | 4.04219  | 3.3448   | 3.48096   |
| DCUN1D4 | 4.89383  | 4.81501  | 4.95153  | 4.85478  | 5.51712  | 5.42256   |
| DCUN1D5 | 2.2198   | 2.12589  | 3.84439  | 4.2097   | 3.85341  | 4.29328   |
| DCXR    | 3.7345   | 3.64438  | 2.73236  | 3.09085  | 4.79706  | 5.32118   |
| DDA1    | 3.59209  | 3.48669  | 2.87953  | 3.28778  | 4.33243  | 4.27169   |
| DDAH1   | 4.2076   | 4.40894  | 3.4984   | 4.21128  | 6.03024  | 5.74639   |
| DDAH2   | 1.70609  | 1.52019  | 2.13391  | 2.21312  | 2.77641  | 3.05484   |
| DDB1    | 7.4171   | 7.47593  | 7.06145  | 7.55745  | 6.93282  | 7.0096    |
| DDB2    | 5.86339  | 5.84177  | 2.98139  | 3.12     | 3.01035  | 2.56476   |
| DDHD1   | 4.71243  | 4.62594  | 4.56633  | 4.47048  | 4.97402  | 4.60843   |
| DDHD2   | 4.64204  | 4.92368  | 4.33062  | 4.67498  | 4.2593   | 4.36206   |
| DDI1    | -4.37417 | -3.70359 | 2.28816  | 1.53506  | -1.53468 | -0.752294 |
| DDI2    | 5.03313  | 5.2485   | 4.89131  | 5.14714  | 5.17717  | 5.09004   |
| DDIAS   | 4.27962  | 4.32669  | 3.92368  | 4.23324  | 4.34951  | 4.56007   |
| DDIT3   | 2.15442  | 1.96494  | 3.11564  | 4.00711  | 3.43395  | 3.62309   |
| DDIT4   | 5.92575  | 5.5228   | 4.60517  | 4.89985  | 6.64462  | 5.68272   |
| DDO     | -4.37417 | -3.29152 | 0.747284 | 0.810106 | 0.757612 | 0.863209  |
| DDOST   | 7.4385   | 7.31122  | 6.85904  | 7.16794  | 7.49649  | 7.57179   |
| DDR1    | 5.02926  | 5.09221  | 4.89261  | 5.07294  | 6.38183  | 6.53408   |
| DDR2    | 6.5499   | 6.46604  | 6.48865  | 6.79127  | 7.10424  | 7.22897   |
| DDR GK1 | 3.76954  | 3.57882  | 3.91844  | 4.17194  | 3.55643  | 3.028     |
| DDT     | 3.77358  | 3.88312  | 3.22927  | 3.62601  | 3.39939  | 4.08181   |
| DDTL    | 2.33859  | 2.30694  | 1.74364  | 1.97294  | 1.93867  | 1.55651   |
| DDX1    | 6.05208  | 6.23908  | 4.69299  | 5.29151  | 5.59444  | 6.17475   |
| DDX10   | 3.31764  | 3.27375  | 4.58576  | 4.85763  | 4.38612  | 4.19402   |
| DDX11   | 5.16373  | 5.02739  | 4.91292  | 4.99304  | 4.37613  | 3.6776    |
| DDX12P  | 2.32505  | 2.02756  | 1.72545  | 1.80257  | 0.512419 | -0.120006 |
| DDX17   | 8.34974  | 8.30892  | 8.55021  | 8.46283  | 8.00242  | 7.68626   |
| DDX18   | 6.45666  | 6.56181  | 5.26396  | 5.67212  | 6.73038  | 7.17748   |
| DDX18P1 | 0.4654   | 0.497117 | 0.503064 | 0.317536 | 0.243438 | 0.384061  |
| DDX18P5 | 1.25482  | 1.23902  | 0.308431 | 0.31299  | 1.27182  | 1.30919   |
| DDX19A  | 5.10805  | 5.12439  | 4.7522   | 4.9815   | 6.39769  | 6.33148   |

|         |           |          |           |            |           |            |
|---------|-----------|----------|-----------|------------|-----------|------------|
| DDX19B  | 2.88912   | 2.70543  | 2.96396   | 3.48135    | 4.72913   | 4.84162    |
| DDX20   | 4.63226   | 4.7749   | 4.11562   | 4.4029     | 4.2851    | 4.37409    |
| DDX21   | 7.76588   | 7.90377  | 6.04018   | 6.53752    | 8.29178   | 8.4361     |
| DDX23   | 6.21142   | 6.19436  | 5.62944   | 5.95822    | 5.66497   | 5.31629    |
| DDX24   | 6.63475   | 6.63756  | 5.49145   | 5.80587    | 6.5826    | 6.36412    |
| DDX26B  | 1.82059   | 1.81795  | 2.68685   | 2.6225     | 3.24508   | 3.31288    |
| DDX27   | 5.86388   | 5.86398  | 5.06883   | 5.36944    | 5.81774   | 5.56332    |
| DDX28   | 2.31772   | 2.3874   | 2.30378   | 2.67824    | 2.6673    | 3.26156    |
| DDX31   | 3.74714   | 3.82993  | 2.90218   | 3.21917    | 3.47328   | 3.78669    |
| DDX39A  | 5.32743   | 5.32505  | 4.23327   | 4.60283    | 5.17574   | 5.32118    |
| DDX39B  | 6.62623   | 6.44452  | 6.41878   | 6.5108     | 7.04718   | 6.66653    |
| DDX3P1  | 0.0954519 | 0.060836 | 0.045429  | 0.605504   | 0.282309  | 0.100762   |
| DDX3P3  | 0.710384  | 0.997054 | -0.723865 | -0.0422696 | 0.863447  | -0.0627204 |
| DDX3X   | 8.15064   | 8.25987  | 6.84677   | 7.30539    | 8.11642   | 8.19904    |
| DDX3Y   | ?         | ?        | 2.79948   | 3.17658    | -6.64581  | -5.69922   |
| DDX41   | 4.41466   | 4.26252  | 4.80728   | 5.1632     | 5.47763   | 5.05649    |
| DDX42   | 6.12428   | 6.09269  | 6.2285    | 6.39249    | 6.84909   | 6.33665    |
| DDX46   | 6.71828   | 6.65602  | 6.44603   | 6.52751    | 6.58241   | 6.30175    |
| DDX47   | 5.51245   | 5.52082  | 4.94663   | 5.35233    | 5.18127   | 5.39456    |
| DDX49   | 3.884     | 3.69576  | 2.81084   | 3.24433    | 4.75331   | 5.17286    |
| DDX5    | 8.34595   | 8.40604  | 8.31822   | 8.61494    | 9.00842   | 8.98468    |
| DDX50   | 4.53477   | 4.59017  | 3.86132   | 4.18376    | 4.82862   | 5.42609    |
| DDX50P1 | 1.51846   | 1.5108   | 1.25491   | 1.19029    | 1.55322   | 1.49402    |
| DDX51   | 3.42892   | 3.33158  | 2.88795   | 3.11999    | 3.39903   | 2.79712    |
| DDX52   | 4.59967   | 4.796    | 4.93003   | 5.32453    | 5.46373   | 5.76893    |
| DDX54   | 4.39009   | 4.3845   | 3.38294   | 4.01302    | 3.97521   | 4.3107     |
| DDX55   | 4.95807   | 4.8111   | 3.59887   | 3.84268    | 4.30983   | 4.04578    |
| DDX56   | 5.46708   | 5.56883  | 4.86496   | 5.37699    | 5.50554   | 5.60161    |
| DDX58   | 2.7418    | 3.31689  | 3.41266   | 3.96264    | 5.30657   | 5.76847    |
| DDX59   | 3.24344   | 3.13149  | 2.7113    | 3.11518    | 3.08789   | 3.45316    |
| DDX6    | 6.57047   | 6.60624  | 6.87203   | 7.06526    | 6.67186   | 6.88894    |
| DDX60   | 2.33436   | 2.50006  | 3.83884   | 4.01788    | 3.53568   | 3.5833     |
| DDX60L  | 3.16356   | 3.3637   | 3.90791   | 3.87131    | 4.46637   | 4.62195    |
| DDX6P2  | 0.400079  | 0.225028 | 0.773186  | 1.13126    | 0.439347  | 0.407048   |
| DEAF1   | 3.73137   | 3.43349  | 3.44035   | 3.5864     | 3.42317   | 3.4582     |
| DECR1   | 2.1713    | 2.11082  | 3.75605   | 3.93693    | 3.29679   | 4.14191    |
| DECR2   | 1.64525   | 1.30538  | 1.67769   | 1.7241     | 0.976371  | 1.00759    |
| DEDD    | 4.12661   | 4.16122  | 3.32887   | 3.66346    | 4.20966   | 4.15543    |
| DEDD2   | 2.91195   | 2.74905  | 2.87718   | 3.17657    | 3.57571   | 3.40962    |
| DEF8    | 4.7235    | 4.46933  | 3.48352   | 3.70815    | 3.86912   | 4.46446    |
| DEGS1   | 5.49627   | 5.42476  | 5.89861   | 6.18694    | 6.08594   | 6.05941    |
| DEK     | 6.64309   | 6.86259  | 5.98607   | 6.55784    | 7.35031   | 7.77204    |
| DENND1A | 3.23313   | 3.39669  | 2.60765   | 2.98393    | 2.61582   | 2.73209    |
| DENND1B | 4.80106   | 4.56871  | 2.92762   | 2.75227    | 3.78284   | 3.47649    |
| DENND2A | -3.22992  | -3.13966 | 1.08332   | 0.549472   | 3.19767   | 2.48805    |
| DENND2C | 0.760425  | 0.467978 | -3.18222  | -2.52305   | 0.578176  | 0.247587   |
| DENND3  | 3.16201   | 3.24968  | 3.60764   | 3.82928    | -0.374735 | -0.662104  |
| DENND4A | 5.02627   | 4.9976   | 4.41731   | 4.59247    | 4.72177   | 4.90706    |
| DENND4B | 4.22424   | 4.01692  | 3.61576   | 3.67253    | 4.29678   | 3.84402    |
| DENND4C | 4.93527   | 4.97749  | 5.21574   | 5.29787    | 5.99967   | 6.15514    |
| DENND5A | 5.78573   | 5.53326  | 5.97664   | 6.28964    | 5.98647   | 5.62755    |
| DENND5B | 5.89476   | 5.58632  | 4.33513   | 4.44767    | 5.17375   | 5.082      |

|           |          |           |           |           |          |            |
|-----------|----------|-----------|-----------|-----------|----------|------------|
| DENND6A   | 4.27533  | 4.34047   | 3.4108    | 3.50404   | 4.48625  | 4.78012    |
| DENR      | 4.96152  | 5.20519   | 4.08059   | 4.58552   | 5.27124  | 5.59018    |
| DEPDC1    | 5.60806  | 5.84313   | 5.36151   | 5.9803    | 5.86514  | 6.31643    |
| DEPDC1B   | 4.19876  | 4.15094   | 3.86086   | 3.70815   | 4.30474  | 4.70479    |
| DEPDC5    | 3.21381  | 3.09749   | 3.17403   | 3.3258    | 2.96175  | 2.919      |
| DEPDC7    | 6.87815  | 6.6291    | -1.09576  | -1.46458  | 1.64351  | 1.38079    |
| DERA      | 3.26526  | 3.09366   | 3.50472   | 3.85262   | 2.85736  | 3.38869    |
| DERL1     | 4.68183  | 4.74123   | 4.9952    | 5.40081   | 5.13459  | 5.37552    |
| DERL2     | 4.6603   | 4.60011   | 4.97814   | 5.26385   | 5.11927  | 5.44591    |
| DESI1     | 4.18279  | 4.34853   | 4.29322   | 4.93214   | 4.43112  | 4.60843    |
| DESI2     | 5.42526  | 5.52232   | 5.22253   | 5.65024   | 5.72474  | 5.94997    |
| DET1      | 1.53634  | 1.20466   | 1.92739   | 1.86942   | 1.42761  | 1.28202    |
| DEXI      | 1.56024  | 1.68263   | 2.49625   | 2.75486   | 2.50052  | 2.2016     |
| DFFA      | 5.15474  | 5.36958   | 4.9669    | 5.37654   | 6.08349  | 5.86343    |
| DFFB      | 2.37239  | 1.94657   | 1.32432   | 1.37503   | 2.10126  | 1.56011    |
| DFNA5     | 4.04154  | 4.08018   | 4.02715   | 4.52143   | 3.40039  | 4.06643    |
| DFNB31    | 0.480917 | 0.432061  | 1.15638   | 0.857026  | 1.65261  | 1.12623    |
| DGAT1     | 2.31273  | 2.39165   | 2.62896   | 3.04098   | 2.42019  | 2.79676    |
| DGAT2     | 3.88537  | 3.86525   | 1.18285   | 1.65939   | -6.64581 | -4.70296   |
| DGCR11    | 1.78879  | 1.60328   | 1.496     | 1.25754   | 0.606556 | 0.668401   |
| DGCR14    | 3.55818  | 3.4152    | 2.53416   | 2.88836   | 1.99435  | 2.32666    |
| DGCR2     | 5.35042  | 5.12865   | 5.53372   | 5.45151   | 4.73895  | 4.4607     |
| DGCR6L    | 2.90411  | 2.82982   | 3.19882   | 3.38495   | 2.68294  | 3.83073    |
| DGCR8     | 5.06993  | 5.0355    | 4.72935   | 4.7875    | 4.76437  | 4.31843    |
| DGKA      | 3.22167  | 3.08791   | 2.81084   | 3.1224    | 1.34536  | 1.31651    |
| DGKD      | 4.20704  | 4.18101   | 5.3018    | 5.48687   | 4.8603   | 4.53169    |
| DGKE      | 2.18968  | 2.05287   | 0.966283  | 1.22214   | 0.32848  | -0.0918635 |
| DGKG      | 2.62961  | 2.67671   | 3.17183   | 3.53863   | 3.43942  | 3.22107    |
| DGKH      | 4.97766  | 5.05226   | 4.8141    | 4.87372   | 4.86016  | 4.76734    |
| DGKI      | 1.88591  | 1.88591   | -0.757028 | -0.131402 | 1.24663  | 2.71115    |
| DGKQ      | 1.18971  | 0.804012  | 2.25944   | 2.0561    | 2.31699  | 2.01441    |
| DGKZ      | 2.40377  | 2.16396   | 2.81695   | 2.86232   | 3.12315  | 2.96025    |
| DGKZP1    | 2.74216  | 2.6631    | 3.24659   | 3.32818   | 3.74133  | 3.50406    |
| DGUOK     | 4.09208  | 4.10511   | 3.48714   | 3.80705   | 4.08621  | 4.48187    |
| DHCR24    | 8.08763  | 7.99407   | 7.74232   | 7.92083   | 9.19358  | 9.0532     |
| DHCR7     | 6.13202  | 6.14262   | 5.1151    | 5.49433   | 5.68923  | 5.67103    |
| DHDDS     | 4.01517  | 4.037     | 3.75458   | 4.11759   | 4.5071   | 4.49051    |
| DHFR      | 5.52432  | 5.54431   | 5.95607   | 6.23204   | 6.08548  | 6.24473    |
| DHFRL1    | 2.779    | 2.66524   | 2.9415    | 2.95182   | 2.36894  | 2.09274    |
| DHFRP1    | 3.4044   | 3.44263   | 3.66635   | 4.02793   | 3.6907   | 4.24829    |
| DHODH     | 3.04408  | 2.98424   | 2.61739   | 2.87132   | 3.87496  | 3.581      |
| DHPS      | 4.11601  | 4.27048   | 3.51065   | 3.87902   | 4.52686  | 4.60958    |
| DHRS1     | 2.3316   | 2.17742   | 1.5714    | 1.79809   | 2.3026   | 2.15749    |
| DHRS11    | 3.24637  | 2.98837   | 2.6109    | 2.23104   | 3.64689  | 2.96925    |
| DHRS12    | 0.243547 | 0.331671  | 0.935482  | 0.773887  | 0.83161  | 1.13883    |
| DHRS13    | 1.88706  | 1.82328   | 1.45219   | 2.05791   | 1.91214  | 1.63167    |
| DHRS3     | 6.71944  | 6.41616   | 1.67449   | 2.04601   | 5.51554  | 5.27413    |
| DHRS4     | 0.651013 | 0.556444  | 0.833344  | 1.3636    | -0.17178 | 0.105236   |
| DHRS4-AS1 | 0.718622 | 0.60826   | 0.359004  | 0.766358  | 0.817034 | 1.32339    |
| DHRS4L2   | 0.365334 | -0.152183 | 0.435543  | 0.604195  | 0.5397   | 1.15295    |
| DHRS7     | 3.99947  | 4.31059   | 3.04985   | 3.36192   | 3.27487  | 3.98868    |
| DHRS7B    | 2.67161  | 2.83408   | 3.21308   | 3.6208    | 3.02969  | 3.37011    |



|               |          |            |          |          |           |           |
|---------------|----------|------------|----------|----------|-----------|-----------|
| DHRX          | 1.02889  | 1.27191    | 1.89865  | 2.43808  | 1.72774   | 2.19417   |
| DHTKD1        | 4.68299  | 4.72944    | 3.88391  | 4.31428  | 4.15747   | 4.05483   |
| DHX15         | 7.23329  | 7.26485    | 6.4465   | 6.73369  | 7.20946   | 7.18524   |
| DHX16         | 4.66669  | 4.63778    | 4.16631  | 4.66596  | 5.21775   | 4.94971   |
| DHX29         | 4.58402  | 4.81732    | 5.06263  | 5.5323   | 4.7914    | 5.43539   |
| DHX30         | 5.89499  | 5.77222    | 5.05189  | 5.24592  | 5.67171   | 5.61405   |
| DHX32         | 4.27042  | 4.27233    | 4.90828  | 5.14145  | 4.9434    | 5.17845   |
| DHX33         | 4.71137  | 4.50365    | 4.3302   | 4.45436  | 5.27961   | 4.80404   |
| DHX34         | 3.54171  | 3.51872    | 3.15633  | 3.35674  | 3.72556   | 3.62196   |
| DHX35         | 3.78574  | 3.72326    | 3.58796  | 3.7784   | 2.8215    | 2.63759   |
| DHX36         | 5.23902  | 5.21794    | 5.39058  | 5.45388  | 5.76147   | 5.7971    |
| DHX37         | 3.60698  | 3.54839    | 2.68376  | 3.18349  | 3.76909   | 3.65303   |
| DHX38         | 4.9938   | 5.02487    | 4.95066  | 5.20781  | 5.19663   | 4.6818    |
| DHX40         | 5.46721  | 5.68276    | 4.8249   | 5.42357  | 5.88441   | 6.45377   |
| DHX57         | 4.63519  | 4.60323    | 4.35756  | 4.43709  | 4.75436   | 4.8421    |
| DHX58         | 0.430296 | 0.151976   | 1.55122  | 1.82784  | 2.12107   | 1.96574   |
| DHX8          | 5.45381  | 5.33236    | 5.68375  | 5.95521  | 6.01853   | 5.90659   |
| DHX9          | 7.8175   | 7.84256    | 6.9388   | 7.279    | 7.51109   | 7.61979   |
| DHX9P1        | 3.37508  | 3.67849    | 2.67409  | 3.0082   | 3.30064   | 3.0147    |
| DIABLO        | 4.5324   | 4.41715    | 3.73955  | 4.14996  | 4.3249    | 4.66853   |
| DIAPH1        | 6.06784  | 6.22957    | 6.5115   | 6.59141  | 5.60354   | 5.94926   |
| DIAPH2        | 3.95026  | 4.0206     | 3.67279  | 3.86041  | 4.36125   | 4.80862   |
| DIAPH3        | 5.15494  | 5.19972    | 4.57451  | 4.81362  | 4.67727   | 4.86787   |
| DICER1        | 6.46252  | 6.19513    | 5.48092  | 5.21422  | 6.60354   | 5.5879    |
| DIDO1         | 6.64147  | 6.56124    | 5.88827  | 5.97397  | 6.12165   | 5.69468   |
| DIEXF         | 4.92296  | 5.10034    | 3.63665  | 4.06235  | 4.6773    | 4.89875   |
| DIMT1         | 3.97334  | 4.04891    | 3.97886  | 4.25202  | 4.48434   | 4.67806   |
| DIO2          | 2.19272  | 1.37009    | 3.88526  | 4.63851  | 3.97359   | 4.13562   |
| DIP2A         | 4.12905  | 4.18371    | 5.13613  | 5.23046  | 4.20464   | 3.57405   |
| DIP2B         | 5.84248  | 5.73898    | 5.29219  | 5.37296  | 5.75331   | 5.47195   |
| DIP2C         | 3.33845  | 3.25997    | 3.57636  | 3.46293  | 3.66499   | 3.34314   |
| DIRAS1        | 2.27248  | 1.98839    | -1.53926 | -2.10822 | -2.41163  | -2.70579  |
| DIRAS3        | -2.17488 | -2.29223 ? |          | -4.10635 | 1.40581   | 2.02802   |
| DIRC2         | 3.36297  | 3.43197    | 3.28     | 3.46483  | 2.90003   | 3.11984   |
| DIS3          | 5.90887  | 5.93497    | 5.16608  | 5.40249  | 4.58749   | 4.80871   |
| DIS3L         | 3.40552  | 3.35253    | 3.8249   | 4.17194  | 3.75755   | 3.85552   |
| DIS3L2        | 3.83325  | 3.80653    | 3.83776  | 3.79417  | 3.61046   | 3.49725   |
| DISC1         | 3.30743  | 2.93566    | 3.24555  | 2.94871  | 1.34288   | 0.826079  |
| DISP1         | 2.48581  | 2.56507    | 2.49597  | 2.68885  | 5.07121   | 4.78371   |
| DISP2         | 0.845109 | 0.0481804  | 1.17408  | 0.884113 | -0.587897 | -1.14178  |
| DIXDC1        | 2.61381  | 3.02299    | 3.92761  | 4.36994  | 4.4754    | 4.76901   |
| DKC1          | 6.02709  | 6.07485    | 4.75905  | 5.27917  | 6.44269   | 6.36002   |
| DKFZP434I0714 | 1.32887  | 1.52019    | 1.662    | 1.59857  | 0.939663  | 0.922708  |
| DKFZp434P228  | 2.73323  | 3.29114    | 1.48856  | 1.33087  | 3.56942   | 3.19585   |
| DKK1          | 3.53453  | 3.47673    | 2.46754  | 3.55117  | 5.48274   | 6.57868   |
| DKK3          | 6.13713  | 6.00352    | 6.26433  | 6.9638   | 5.88319   | 6.40049   |
| DLAT          | 3.3302   | 3.35414    | 4.54525  | 5.05293  | 5.19689   | 5.30307   |
| DLC1          | 5.82891  | 5.67222    | 5.41497  | 5.27218  | 0.519683  | 0.0483059 |
| DLD           | 6.02241  | 6.01442    | 5.59904  | 5.71691  | 6.00079   | 6.39852   |
| DLEU1         | 2.71878  | 2.69956    | 2.56803  | 2.67582  | 3.12105   | 3.34314   |
| DLEU2         | 3.40724  | 3.38807    | 3.68844  | 3.52937  | 3.57079   | 2.87153   |
| DLEU2L        | 2.1139   | 1.99506    | 2.59303  | 2.32882  | 1.23057   | 0.982904  |

|            |            |           |           |           |           |           |
|------------|------------|-----------|-----------|-----------|-----------|-----------|
| DLG1       | 5.05784    | 5.02143   | 6.12534   | 6.36756   | 7.05431   | 6.87536   |
| DLG3       | 2.20783    | 2.47086   | 1.77651   | 2.18581   | 0.652647  | 1.75275   |
| DLG4       | 2.13699    | 1.51447   | 3.19152   | 3.17426   | 2.66837   | 2.28199   |
| DLG5       | 4.20083    | 4.20109   | 5.31421   | 5.42296   | 5.68196   | 5.49408   |
| DLGAP1-AS1 | 2.1713     | 2.19181   | 0.517004  | 0.248838  | 1.39501   | 1.41227   |
| DLGAP1-AS2 | 2.49076    | 2.37952   | 1.60441   | 1.95729   | 2.50712   | 2.37012   |
| DLGAP4     | 4.28945    | 4.14274   | 3.96458   | 3.85433   | 3.07257   | 3.03458   |
| DLGAP5     | 5.668      | 5.69767   | 4.61899   | 5.04788   | 5.16545   | 5.71377   |
| DLST       | 4.8795     | 4.8491    | 4.05287   | 4.36433   | 4.87247   | 4.96784   |
| DLX1       | 3.39368    | 3.23933   | 1.27595   | 1.64609   | 1.60182   | 1.76905   |
| DLX6       | 1.72721    | 1.61934 ? |           | -5.10387  | 1.01923   | 1.18815   |
| DLX6-AS1   | 3.18509    | 3.06464   | -4.59508  | -6.09892  | 3.30548   | 3.53646   |
| DMAPI      | 3.86125    | 3.8489    | 4.80728   | 4.86558   | 4.14784   | 3.63758   |
| DMD        | -0.917461  | -0.105152 | 0.925065  | 0.476226  | 2.2526    | 1.77713   |
| DMPK       | 2.45518    | 2.01652   | 2.79863   | 2.78766   | 4.23831   | 3.93226   |
| DMRT2      | 2.12431    | 1.91656 ? |           | -6.09892  | -6.64581  | -5.69922  |
| DMRTA1     | 2.72929    | 2.57608   | -1.13882  | -0.979274 | 3.16624   | 3.18811   |
| DMTF1      | 5.63293    | 5.57561   | 6.34363   | 6.16526   | 5.87076   | 5.40043   |
| DMWD       | 3.28667    | 3.06055   | 3.28842   | 3.46672   | 4.02077   | 3.63266   |
| DMXL1      | 5.73635    | 5.80686   | 5.49772   | 5.81706   | 5.91967   | 6.11784   |
| DMXL2      | 5.91618    | 5.79744   | 6.61746   | 6.8348    | 5.54931   | 5.52904   |
| DNA2       | 4.07241    | 4.15738   | 3.58632   | 3.68071   | 3.94979   | 4.08931   |
| DNAAF2     | 3.08884    | 3.17377   | 1.35568   | 1.60545   | 2.61117   | 3.24458   |
| DNAAF5     | 3.85263    | 3.70446   | 3.9776    | 4.18004   | 4.23826   | 4.30591   |
| DNAH1      | -0.0550876 | -0.053317 | 1.85542   | 2.00494   | 0.807363  | 0.483199  |
| DNAH17     | 0.649726   | 0.53095   | 0.386425  | 0.505972  | 0.269392  | -0.214706 |
| DNAH5      | 0.334442   | 0.697098  | 4.0063    | 4.30374   | 2.05396   | 2.22994   |
| DNAH7      | -0.159773  | -0.27286  | -2.18288  | -2.93781  | 1.37865   | 1.37014   |
| DNAH9      | 2.67999    | 2.68182   | -3.85951  | -3.52222  | -2.95876  | -3.70484  |
| DNAJA1     | 6.56254    | 6.52546   | 6.36071   | 6.70435   | 7.89616   | 7.93047   |
| DNAJA1P3   | 1.53032    | 1.80397   | 1.496     | 2.1152    | 3.16805   | 2.80505   |
| DNAJA2     | 5.33639    | 5.44366   | 5.33954   | 5.80256   | 6.33119   | 6.75245   |
| DNAJA3     | 4.83473    | 4.86526   | 4.71356   | 5.17076   | 5.02486   | 5.31357   |
| DNAJA4     | 0.0425183  | -0.177294 | -0.790968 | -0.436219 | 0.983605  | 0.380851  |
| DNAJB1     | 5.66682    | 5.62453   | 5.40315   | 5.81899   | 7.17373   | 7.29029   |
| DNAJB11    | 5.82545    | 5.54929   | 5.93563   | 6.13098   | 6.21197   | 6.07434   |
| DNAJB12    | 4.48393    | 4.52582   | 4.0984    | 4.56712   | 5.0509    | 5.15747   |
| DNAJB14    | 5.37974    | 5.43855   | 5.7378    | 5.85885   | 5.70491   | 5.72733   |
| DNAJB2     | 3.69323    | 3.51013   | 3.59291   | 3.7193    | 4.42317   | 4.20916   |
| DNAJB4     | 3.22425    | 3.38891   | 4.59947   | 5.17598   | 5.43013   | 6.12972   |
| DNAJB5     | 1.77263    | 1.13712   | 2.13842   | 2.17659   | 3.21005   | 2.74038   |
| DNAJB6     | 5.57585    | 5.46063   | 6.12113   | 6.20033   | 5.46681   | 4.9857    |
| DNAJB9     | 3.75558    | 3.81713   | 3.11569   | 3.5565    | 4.11858   | 4.50874   |
| DNAJC1     | 3.82839    | 3.58018   | 2.90395   | 3.19496   | 3.75754   | 3.76902   |
| DNAJC10    | 6.25258    | 6.5543    | 5.6121    | 6.00196   | 6.47606   | 7.05171   |
| DNAJC11    | 4.57575    | 4.56124   | 4.24585   | 4.53455   | 4.90827   | 4.82712   |
| DNAJC12    | 0.586404   | 0.822624  | -2.48229  | -1.25052  | 2.2734    | 3.53407   |
| DNAJC13    | 5.74256    | 5.81327   | 5.8161    | 6.09451   | 5.41649   | 5.60446   |
| DNAJC14    | 5.47136    | 5.44145   | 4.63281   | 4.87584   | 4.91148   | 4.67635   |
| DNAJC15    | 2.19576    | 2.24798   | 2.23435   | 2.47239   | -0.551587 | -0.348991 |
| DNAJC16    | 4.06828    | 4.15186   | 3.97635   | 4.3547    | 4.72284   | 5.01437   |
| DNAJC17    | 2.48537    | 2.38786   | 1.92417   | 2.03855   | 1.91086   | 1.77423   |

|            |           |           |           |           |            |           |
|------------|-----------|-----------|-----------|-----------|------------|-----------|
| DNAJC18    | 3.09372   | 3.01289   | 3.59291   | 3.81003   | 3.49451    | 3.48311   |
| DNAJC19    | 2.18518   | 2.09365   | 2.66241   | 2.71955   | 3.13576    | 3.25914   |
| DNAJC19P9  | 1.01162   | 1.17751   | 1.11906   | 1.29574   | 2.07436    | 2.62411   |
| DNAJC2     | 5.07683   | 5.15195   | 4.54645   | 4.93185   | 5.24529    | 5.17432   |
| DNAJC21    | 4.77107   | 4.8237    | 5.36337   | 5.50034   | 5.40845    | 5.24601   |
| DNAJC22    | 2.76241   | 2.36689   | 4.00876   | 4.24872   | 3.39226    | 3.73      |
| DNAJC24    | 2.85167   | 3.11081   | 2.77068   | 3.1248    | 3.4651     | 3.83244   |
| DNAJC25    | 2.17026   | 2.24078   | 2.68635   | 3.13379   | 2.57952    | 2.3212    |
| DNAJC27    | 1.88116   | 1.78781   | 1.73956   | 1.6855    | 2.26748    | 2.18446   |
| DNAJC3     | 6.22743   | 6.16009   | 6.15354   | 6.60173   | 5.59795    | 5.61633   |
| DNAJC3-AS1 | 1.09539   | 0.813344  | 1.07392   | 0.946514  | -0.0454657 | -0.577229 |
| DNAJC30    | 2.15634   | 1.94976   | 2.20593   | 2.36317   | 1.92956    | 1.65347   |
| DNAJC4     | 1.79866   | 1.46663   | 1.82772   | 1.93808   | 2.00567    | 2.17595   |
| DNAJC5     | 6.30155   | 6.23086   | 5.8751    | 6.1067    | 6.63164    | 6.44582   |
| DNAJC6     | 3.87739   | 4.29453   | -1.01332  | 0.0410467 | 3.96448    | 4.20167   |
| DNAJC7     | 5.10468   | 5.18104   | 5.33406   | 5.6944    | 5.881      | 5.92775   |
| DNAJC8     | 5.60798   | 5.53137   | 4.97165   | 5.31276   | 5.72316    | 6.23209   |
| DNAJC9     | 4.352     | 4.54636   | 3.44906   | 3.81972   | 5.13282    | 5.29695   |
| DNAL1      | 3.29386   | 3.54405   | 2.693     | 3.3605    | 3.14728    | 3.56474   |
| DNAL4      | 1.35081   | 0.831845  | 1.98141   | 2.0711    | 1.19772    | 1.23585   |
| DNASE1     | 4.05517   | 3.97227   | 4.53141   | 4.45973   | 3.35654    | 2.77992   |
| DNASE1L1   | 3.32787   | 3.42225   | 2.62403   | 3.13484   | 3.48064    | 4.03873   |
| DNASE2     | 4.2245    | 4.05552   | 3.36095   | 3.58799   | 4.98835    | 5.27803   |
| DNER       | 0.480917  | 0.746683  | 1.29226   | 2.26188   | 2.71474    | 2.91534   |
| DNHD1      | 4.02997   | 4.1882    | 3.74953   | 3.90686   | 3.53569    | 2.82467   |
| DNLZ       | -0.154805 | 0.222285  | -0.18935  | -0.242198 | -0.0706438 | 0.696216  |
| DNM1       | 3.91287   | 3.65089   | 3.39202   | 3.14147   | 3.91712    | 2.97629   |
| DNM1L      | 6.60446   | 6.63437   | 5.58274   | 5.89457   | 5.56247    | 5.59043   |
| DNM1P51    | 1.42812   | 1.09706   | 1.63716   | 1.35191   | 0.731383   | -0.234184 |
| DNM2       | 5.23459   | 5.07771   | 5.55686   | 5.7223    | 5.83674    | 5.66521   |
| DNM3       | 3.97069   | 3.98527   | 1.35568   | 0.773887  | 4.91332    | 4.35397   |
| DNM3OS     | 1.37242   | 1.58158   | -1.72363  | -1.93836  | -0.217212  | -1.006    |
| DNMBP      | 4.74174   | 4.95252   | 4.71556   | 4.91473   | 4.62434    | 4.33448   |
| DNMT1      | 6.76927   | 6.75801   | 6.00752   | 6.22403   | 6.4118     | 6.12538   |
| DNMT3A     | 4.15578   | 3.84321   | 3.79519   | 3.4496    | 4.97132    | 4.15436   |
| DNMT3B     | 2.91931   | 2.82718   | 2.48182   | 2.50589   | 1.85147    | 1.52214   |
| DNPEP      | 3.21978   | 3.18282   | 4.09608   | 4.62249   | 4.08284    | 4.45693   |
| DNPH1      | 1.00834   | 1.20963   | -0.598354 | -0.52367  | 2.47669    | 2.87449   |
| DNTTIP1    | 4.59207   | 4.5863    | 3.0477    | 3.47614   | 2.88273    | 3.00065   |
| DNTTIP2    | 6.20231   | 6.29434   | 5.70978   | 6.16377   | 6.00616    | 6.50456   |
| DOCK1      | 6.13697   | 6.08634   | 5.98618   | 5.95273   | 5.86792    | 5.90891   |
| DOCK10     | 3.6727    | 3.93483   | 5.91713   | 6.0942    | 5.9284     | 6.14933   |
| DOCK11     | 2.58116   | 2.4614    | 4.25123   | 5.01063   | 1.72342    | 2.18701   |
| DOCK11P1   | -1.55974  | -0.871741 | 0.70967   | 1.59309   | -2.13612   | -1.88008  |
| DOCK3      | 0.693311  | 0.635262  | 0.662041  | 0.935626  | -0.320293  | -0.848487 |
| DOCK4      | 4.59093   | 4.90674   | 1.93025   | 2.27489   | 4.3544     | 4.929     |
| DOCK4-AS1  | 0.752201  | 0.988427  | -1.37581  | -2.52305  | -0.0308197 | -0.121607 |
| DOCK5      | 6.46269   | 6.33639   | 4.71657   | 4.93214   | 5.68231    | 5.50213   |
| DOCK6      | 0.735617  | 0.419895  | 1.30034   | 1.195     | 2.45604    | 2.22994   |
| DOCK7      | 6.13421   | 6.15324   | 5.61332   | 5.74839   | 5.96951    | 5.58445   |
| DOCK9      | 4.162     | 4.25139   | 3.62383   | 3.74136   | 4.53628    | 4.26912   |
| DOHH       | 0.784805  | 0.370142  | 0.308431  | 0.399062  | 0.91718    | 0.80115   |

|           |            |           |           |            |             |          |
|-----------|------------|-----------|-----------|------------|-------------|----------|
| DOK1      | 4.32536    | 4.33318   | 2.19587   | 2.49852    | 2.10458     | 2.56942  |
| DOK4      | 2.51525    | 2.30535   | 3.87068   | 4.15462    | 0.969197    | 1.04823  |
| DOK5      | ?          | ?         | -1.65952  | -2.02079   | 0.246688    | 1.35942  |
| DOK6      | 0.752201   | 0.382745  | -2.48229  | -2.64851   | 2.85332     | 2.11349  |
| DOLK      | 3.66505    | 3.54837   | 3.24484   | 3.53863    | 3.39362     | 3.49296  |
| DOLPP1    | 3.31913    | 3.29539   | 3.07151   | 3.3048     | 3.43508     | 3.12934  |
| DONSON    | 3.37546    | 3.28177   | 4.02043   | 4.05929    | 3.68175     | 3.60724  |
| DOPEY1    | 4.97112    | 4.97902   | 3.90756   | 3.99148    | 4.72819     | 4.75379  |
| DOPEY2    | 1.20786    | 1.14454   | 2.39392   | 3.05357    | 2.65485     | 2.85554  |
| DOT1L     | 3.49358    | 3.14052   | 3.05285   | 2.5462     | 4.17425     | 3.52958  |
| DPAGT1    | 4.28646    | 4.48227   | 3.97755   | 4.342      | 4.23954     | 4.23319  |
| DPCD      | 1.89612    | 2.0738    | 2.44007   | 2.48676    | 3.7529      | 3.6153   |
| DPF1      | 0.577131   | 0.537236  | 0.416483  | 0.350701   | 0.807363    | 0.769095 |
| DPF2      | 4.41514    | 4.43343   | 3.82483   | 4.03837    | 3.46761     | 3.2181   |
| DPH1      | 2.93071    | 3.07012   | 3.63209   | 4.04039    | 3.30214     | 3.51243  |
| DPH2      | 4.86268    | 4.84605   | 3.77936   | 4.32684    | 5.31981     | 5.79513  |
| DPH3      | 4.05664    | 4.00986   | 3.27796   | 3.78447    | 4.9553      | 5.42061  |
| DPH5      | 3.11693    | 3.16582   | 3.08327   | 3.47685    | 3.53613     | 4.09455  |
| DPH6      | 3.07736    | 2.88146   | 1.66826   | 1.94648    | 2.18833     | 2.34315  |
| DPH7      | 3.29669    | 3.24279   | 3.07858   | 3.17426    | 3.66612     | 3.58791  |
| DPM1      | 5.06661    | 5.097     | 4.38348   | 4.7288     | 4.57029     | 5.39787  |
| DPM2      | 4.18356    | 4.15067   | 3.25919   | 3.41669    | 4.58282     | 4.25906  |
| DPM3      | 2.1083     | 1.52018   | 1.28413   | 1.41477    | 2.22845     | 2.99026  |
| DPP3      | 4.38858    | 4.23439   | 3.95855   | 4.14066    | 4.14023     | 4.30114  |
| DPP7      | 3.86602    | 3.435     | 3.10188   | 3.24653    | 3.37998     | 3.47568  |
| DPP8      | 5.04827    | 5.19937   | 5.02897   | 5.34752    | 5.34143     | 5.52451  |
| DPP9      | 3.98931    | 3.85851   | 3.744     | 3.92738    | 4.82247     | 4.58377  |
| DPY19L1   | 6.25756    | 6.22004   | 5.6565    | 5.67262    | 5.92639     | 5.32771  |
| DPY19L1P1 | 0.219203   | 0.0709938 | 0.405862  | 0.364909   | -0.00219312 | -0.2613  |
| DPY19L2   | 0.730444   | 0.736518  | 0.279923  | -0.0703181 | 1.80982     | 1.76586  |
| DPY19L2P1 | 0.00842952 | -0.373983 | -0.418049 | -0.341426  | 2.73534     | 2.84924  |
| DPY19L2P2 | 3.07244    | 3.10558   | 0.957959  | 1.28354    | 2.5078      | 2.2044   |
| DPY19L3   | 5.33123    | 5.12822   | 4.95601   | 4.917      | 5.44199     | 5.24457  |
| DPY19L4   | 4.53453    | 4.71145   | 4.72412   | 4.88763    | 4.67842     | 4.94433  |
| DPY30     | 3.65914    | 3.91715   | 2.69459   | 3.01188    | 3.80634     | 4.2091   |
| DPYD      | 5.06827    | 5.11076   | 5.35898   | 5.65724    | 6.06755     | 6.2684   |
| DPYSL2    | 7.15533    | 6.94082   | 6.47826   | 6.74444    | 5.27929     | 5.16133  |
| DPYSL3    | 5.68464    | 6.18871   | 7.73333   | 8.05343    | 5.74351     | 5.92808  |
| DPYSL4    | -2.05464   | -2.46206  | 3.41266   | 2.97599    | 3.72662     | 3.06808  |
| DR1       | 5.84444    | 6.00093   | 5.14963   | 5.51824    | 6.14823     | 6.05231  |
| DRAM1     | 4.69591    | 4.82659   | 4.997     | 5.40193    | 4.01829     | 5.05649  |
| DRAM2     | 2.95988    | 3.41737   | 2.87718   | 3.55255    | 3.25586     | 4.41147  |
| DRAP1     | 5.35586    | 5.33115   | 4.52211   | 5.05544    | 4.30331     | 4.51487  |
| DRD2      | -2.69815   | -2.1403   | -0.69145  | 0.833756   | 0.529601    | 1.38079  |
| DRG1      | 4.98193    | 5.00958   | 4.32907   | 4.94262    | 4.13293     | 4.58919  |
| DRG2      | 3.90695    | 3.77006   | 4.03911   | 4.18156    | 4.67843     | 4.76938  |
| DROSHA    | 5.00352    | 4.90129   | 4.81294   | 4.68882    | 5.0479      | 4.75578  |
| DSCC1     | 3.02714    | 3.34934   | 2.62706   | 2.91355    | 3.23451     | 4.01438  |
| DSCR3     | 4.33657    | 4.45514   | 4.70657   | 4.97266    | 5.27289     | 5.41676  |
| DSE       | 3.62416    | 3.65869   | 6.05834   | 6.27855    | 3.45858     | 3.53058  |
| DSEL      | 4.70022    | 4.02888   | 4.26787   | 3.62074    | 5.1875      | 5.71045  |
| DSG2      | 6.26168    | 6.73114   | 1.41643   | 1.9191     | 1.72306     | 2.33222  |

|                 |          |           |           |            |           |           |
|-----------------|----------|-----------|-----------|------------|-----------|-----------|
| DSN1            | 5.31736  | 5.29536   | 4.74943   | 5.13255    | 4.01212   | 4.33082   |
| DST             | 9.23339  | 9.22177   | 9.63793   | 9.9021     | 10.5922   | 10.6456   |
| DSTN            | 7.68071  | 7.52107   | 6.85864   | 7.34129    | 7.55361   | 7.83387   |
| DSTNP2          | 2.12112  | 2.27188   | 1.97637   | 2.32164    | 2.18206   | 1.95152   |
| DSTYK           | 4.50977  | 4.59039   | 4.26974   | 4.61312    | 4.77171   | 4.7761    |
| DTD1            | 4.86521  | 5.01485   | 3.91388   | 4.45637    | 4.12616   | 4.45899   |
| DTD2            | 2.33607  | 2.63584   | 2.10325   | 2.61843    | 2.64791   | 3.49197   |
| DTL             | 5.28889  | 5.39782   | 5.15073   | 5.60842    | 4.83949   | 4.9034    |
| DTNA            | 0.183671 | 0.060836  | -1.01332  | -0.301307  | 3.73522   | 3.87824   |
| DTNB            | 2.35622  | 2.43803   | 1.70458   | 1.8454     | 2.69505   | 2.82857   |
| DTNBP1          | 1.91933  | 2.06074   | 1.5714    | 2.02562    | 1.92843   | 2.00755   |
| DTWD1           | 3.61241  | 3.53639   | 2.98348   | 3.03743    | 3.32998   | 3.83715   |
| DTWD2           | 2.85167  | 2.57883   | 0.544485  | 0.505972   | 3.67954   | 3.66397   |
| DTX1            | 1.24934  | 1.27867   | -0.825729 | -1.15432 ? | ?         |           |
| DTX2            | 1.60245  | 1.12784   | 2.17022   | 2.49463    | 2.8757    | 2.87185   |
| DTX2P1-UPK3BP1- | 0.124566 | -0.138543 | 0.898959  | 0.797743   | 0.936123  | 0.957439  |
| DTX3            | 2.2696   | 2.09559   | 3.77213   | 3.85551    | 3.68952   | 3.29047   |
| DTX3L           | 3.91388  | 4.04043   | 5.09493   | 5.3765     | 6.36791   | 6.23305   |
| DTX4            | -1.08408 | -1.25306  | 2.39769   | 2.35062    | -0.267833 | -0.536593 |
| DTYMK           | 4.46331  | 4.54065   | 4.14064   | 4.378      | 4.78157   | 5.48988   |
| DUS1L           | 5.05663  | 4.83578   | 3.99638   | 4.10791    | 5.25332   | 5.01352   |
| DUS2            | 2.12751  | 1.94013   | 2.76233   | 2.93354    | 3.45795   | 3.2006    |
| DUS3L           | 2.84191  | 2.22249   | 1.5847    | 1.40691    | 3.03618   | 3.00065   |
| DUS4L           | 2.81491  | 3.02464   | 2.2881    | 2.4659     | 1.97456   | 2.18595   |
| DUSP1           | 1.4199   | 1.18826   | 2.17844   | 2.79205    | 4.59235   | 4.29328   |
| DUSP10          | 3.12589  | 3.95078   | 4.32229   | 4.76152    | 4.02181   | 4.48311   |
| DUSP11          | 3.13855  | 3.20781   | 2.44585   | 2.73039    | 3.14382   | 3.63536   |
| DUSP12          | 3.86982  | 3.86695   | 3.04048   | 3.43614    | 3.51586   | 3.84595   |
| DUSP14          | 4.03902  | 3.88587   | 3.43303   | 3.97331    | 4.3786    | 4.39      |
| DUSP16          | 4.60126  | 4.37713   | 3.42196   | 3.74136    | 4.37033   | 4.35667   |
| DUSP18          | 1.29184  | 1.30521   | 1.43797   | 1.93086    | 0.342452  | 0.337745  |
| DUSP19          | 0.783515 | 0.656176  | 0.782333  | 1.2041     | 1.5246    | 1.70271   |
| DUSP22          | 2.22871  | 2.02501   | 2.23435   | 2.33413    | 2.40579   | 2.01441   |
| DUSP28          | 1.35453  | 1.5651    | 1.60441   | 1.65939    | 1.47172   | 1.78517   |
| DUSP3           | 3.68461  | 3.8214    | 4.62864   | 5.14915    | 5.98421   | 5.99411   |
| DUSP4           | 5.57792  | 5.43612   | 5.32029   | 5.84501    | 3.2997    | 3.31565   |
| DUSP5           | 3.14013  | 3.63782   | 3.30833   | 4.20632    | 2.53937   | 2.22404   |
| DUSP6           | 5.64891  | 5.7584    | 2.37924   | 2.29585    | 2.58265   | 2.38385   |
| DUSP7           | 3.58284  | 3.25312   | 2.04532   | 2.15798    | 3.65144   | 3.40181   |
| DUSP8           | 0.595618 | 0.151976  | -3.59683  | -3.30006   | 1.54918   | 1.18815   |
| DUT             | 5.04913  | 5.25755   | 4.29867   | 4.49594    | 4.46612   | 4.97715   |
| DUXAP8          | 4.40979  | 4.51764   | 3.45473   | 3.62238    | 3.21894   | 3.2539    |
| DUXAP9          | 3.63276  | 3.92654   | 2.52493   | 2.64722    | 3.70907   | 4.00967   |
| DVL1            | 3.17743  | 2.88589   | 2.96877   | 3.26186    | 3.632     | 3.95327   |
| DVL2            | 4.18432  | 4.15462   | 4.21842   | 4.49665    | 4.82601   | 4.87636   |
| DVL3            | 3.76035  | 3.60996   | 4.7014    | 4.66842    | 5.19882   | 4.79212   |
| DXO             | 3.12076  | 2.90046   | 2.67107   | 2.8853     | 3.86099   | 3.54096   |
| DYM             | 4.6234   | 4.46418   | 3.93021   | 3.99051    | 3.50711   | 3.62868   |
| DYNC1H1         | 9.21548  | 9.25533   | 9.01359   | 9.21728    | 9.06907   | 8.67256   |
| DYNC1I1         | 1.14646  | 1.60865   | 1.09265   | 1.30061    | 3.53691   | 3.86504   |
| DYNC1I2         | 5.45288  | 5.4458    | 4.87808   | 5.16136    | 5.29376   | 5.38452   |
| DYNC1I2P1       | 4.49382  | 4.52961   | 3.9453    | 4.23009    | 4.12458   | 4.56625   |

|              |           |          |          |            |          |          |
|--------------|-----------|----------|----------|------------|----------|----------|
| DYNC1LI1     | 4.61324   | 4.84714  | 4.30532  | 4.87343    | 4.93472  | 5.42082  |
| DYNC1LI2     | 6.38084   | 6.39063  | 7.09347  | 7.32458    | 7.48997  | 7.18278  |
| DYNC2H1      | 4.10988   | 4.07437  | 5.8357   | 5.89855    | 4.31982  | 4.71324  |
| DYNC2LI1     | 2.26383   | 2.33483  | 2.42751  | 2.46861    | 2.64576  | 3.20618  |
| DYNLL1       | 5.90633   | 5.87311  | 5.41916  | 5.93589    | 6.04444  | 6.42353  |
| DYNLL2       | 5.64881   | 5.52831  | 5.38252  | 5.43032    | 5.94585  | 5.52869  |
| DYNLRB1      | 4.60296   | 4.45005  | 4.44037  | 4.7692     | 4.82551  | 4.68022  |
| DYNLT1       | 3.31354   | 3.63122  | 3.93412  | 4.4619     | 4.67226  | 5.71849  |
| DYNLT3       | 3.76239   | 3.85116  | 3.16078  | 3.5076     | 4.41112  | 4.65738  |
| DYRK1A       | 5.17635   | 5.22323  | 5.66497  | 5.67059    | 5.33979  | 5.15047  |
| DYRK1B       | -0.865939 | -1.105   | 0.674533 | 0.857026   | 0.878914 | 1.02127  |
| DYRK2        | 6.10498   | 6.08862  | 3.88874  | 3.64002    | 5.4367   | 4.90212  |
| DYRK3        | 2.53695   | 2.73928  | 2.48891  | 3.04347    | 2.69064  | 3.05816  |
| DYRK4        | 2.15398   | 2.15966  | 1.85604  | 2.39996    | 2.04253  | 2.70435  |
| DYX1C1-CCPG1 | 0.262     | 0.224522 | -1.70353 | -0.988808  | 1.94162  | 3.08195  |
| DZANK1       | 1.6051    | 1.53154  | 1.12941  | 1.57771    | 1.2101   | 0.951558 |
| DZIP1        | 4.6475    | 4.58434  | 4.66393  | 4.6545     | 3.53691  | 3.25039  |
| DZIP1L       | 2.34806   | 2.43199  | 2.70523  | 2.7398     | 0.947083 | 0.633217 |
| DZIP3        | 3.85262   | 3.83751  | 5.07797  | 5.07851    | 3.51086  | 3.44049  |
| E2F1         | 5.10544   | 4.89305  | 4.73682  | 5.01593    | 4.48051  | 4.22106  |
| E2F2         | 3.78876   | 3.84777  | 2.5273   | 2.70496    | 3.37723  | 3.31843  |
| E2F3         | 4.4633    | 4.2574   | 4.20017  | 4.03454    | 4.64059  | 4.0565   |
| E2F4         | 4.88774   | 4.7411   | 4.91778  | 5.29258    | 6.18475  | 6.09217  |
| E2F5         | 3.65823   | 3.68523  | 2.49579  | 2.4629     | 4.07195  | 4.28397  |
| E2F6         | 4.02112   | 3.95814  | 3.28841  | 3.23829    | 3.91577  | 4.08438  |
| E2F6P1       | 2.05527   | 2.017    | 1.10031  | 0.998607   | 2.08028  | 2.2937   |
| E2F7         | 4.78372   | 5.02799  | 5.11966  | 5.67086    | 4.49892  | 4.28339  |
| E2F8         | 3.37907   | 3.16286  | 2.46754  | 2.36286    | 2.77433  | 2.30453  |
| E4F1         | 2.72719   | 2.5456   | 2.78803  | 3.0153     | 2.34533  | 2.5925   |
| EAF1         | 4.50541   | 4.80012  | 3.31457  | 4.14617    | 4.70835  | 5.13978  |
| EAPP         | 3.03732   | 3.19537  | 2.21737  | 2.79506    | 3.11118  | 3.74244  |
| EARS2        | 4.40224   | 4.19178  | 4.14963  | 4.37094    | 4.68286  | 4.54831  |
| EBAG9        | 2.73138   | 2.81561  | 2.40521  | 2.77076    | 2.90955  | 3.27057  |
| EBF1         | 1.81665   | 2.31196  | 3.12936  | 2.86273    | 1.89431  | 1.54125  |
| EBF3         | 2.93755   | 3.17892  | -6.17309 | -3.78492 ? | ?        | ?        |
| EBF4         | 1.17748   | 0.859151 | 2.0405   | 1.58469    | -2.85193 | -2.8983  |
| EBLN2        | 1.96983   | 1.95503  | 2.36339  | 1.98923    | 1.43249  | 0.937201 |
| EBLN3        | 4.55003   | 4.61863  | 4.47735  | 4.66841    | 5.8192   | 5.78162  |
| EBNA1BP2     | 5.88299   | 5.89191  | 5.12409  | 5.65599    | 6.05142  | 6.21923  |
| EBP          | 5.24266   | 5.23064  | 3.7398   | 4.01787    | 4.29242  | 4.47071  |
| EBPL         | 3.1211    | 3.44923  | 3.78013  | 4.22991    | 3.28367  | 3.52691  |
| ECD          | 4.12826   | 4.23412  | 3.65883  | 4.00752    | 4.24733  | 4.5197   |
| ECE1         | 6.48702   | 6.67429  | 6.00846  | 6.16758    | 5.91451  | 5.48001  |
| ECE2         | 2.21842   | 1.9633   | 1.78828  | 2.18909    | 1.98554  | 2.72442  |
| ECH1         | 4.29952   | 4.07173  | 4.05923  | 4.28553    | 4.191    | 4.29077  |
| ECHDC1       | 4.63742   | 4.59175  | 4.30531  | 4.61823    | 5.72148  | 6.10825  |
| ECHDC2       | 1.61384   | 1.74664  | -1.79072 | -2.52305   | 2.1145   | 1.1007   |
| ECHS1        | 4.27533   | 4.29287  | 4.54779  | 5.02173    | 5.61202  | 6.11385  |
| ECI1         | 2.52493   | 2.23761  | 2.77938  | 3.10306    | 2.9654   | 3.26195  |
| ECI2         | 3.58179   | 3.54231  | 3.89567  | 4.22142    | 4.63615  | 5.19367  |
| ECM1         | 3.87267   | 4.12211  | 4.44126  | 4.75692    | 1.36764  | 1.93717  |
| ECM2         | 1.20183   | 1.06859  | 1.42385  | 0.879925   | 0.107996 | -0.4586  |

|           |            |           |             |            |           |            |
|-----------|------------|-----------|-------------|------------|-----------|------------|
| ECSIT     | 2.2198     | 2.12214   | 1.94578     | 2.15329    | 2.86717   | 3.27913    |
| ECT2      | 5.96293    | 6.14561   | 5.67096     | 6.05891    | 6.29984   | 6.52748    |
| EDA2R     | -5.69162 ? |           | -4.59508    | -4.10635   | 1.5394    | 1.70271    |
| EDARADD   | 3.23323    | 3.29905   | 3.29352     | 3.87806    | 4.36261   | 4.02303    |
| EDC3      | 4.30049    | 4.30048   | 4.08519     | 4.26167    | 4.1281    | 4.25087    |
| EDC4      | 4.55389    | 4.51665   | 4.74273     | 4.93623    | 5.57913   | 5.53958    |
| EDEM1     | 6.22775    | 6.06633   | 5.75973     | 6.09268    | 5.99942   | 5.745      |
| EDEM2     | 4.80972    | 4.75872   | 4.14291     | 4.4515     | 3.69724   | 4.18657    |
| EDEM3     | 6.31927    | 6.61658   | 5.07682     | 5.53591    | 6.12514   | 6.61012    |
| EDF1      | 5.26886    | 5.11836   | 4.89261     | 5.22264    | 5.4115    | 5.7206     |
| EDIL3     | 4.40932    | 3.80157   | 6.20281     | 6.20534    | 6.93101   | 6.46007    |
| EDN1      | -2.61075   | -1.14061  | 0.558032    | 1.43037    | 1.44302   | 0.893261   |
| EDNRB     | 4.42891    | 4.36052   | -0.757028   | -1.02108   | 3.58287   | 3.16674    |
| EDRF1     | 4.88       | 4.88803   | 4.48819     | 4.55428    | 5.23585   | 5.2542     |
| EDRF1-AS1 | 0.21364    | -0.290692 | 0.272752    | 0.0711723  | 0.240119  | 0.0138981  |
| EEA1      | 5.83221    | 6.01326   | 5.63078     | 5.72266    | 5.10901   | 5.42832    |
| EED       | 3.1115     | 3.10321   | 4.1214      | 4.31743    | 3.54059   | 3.75681    |
| EEF1A1    | 11.0417    | 10.9707   | 9.85917     | 10.4018    | 11.2501   | 11.7675    |
| EEF1A1P11 | 2.75944    | 2.82868   | 1.54392     | 2.25602    | 2.60417   | 3.79776    |
| EEF1A1P12 | 1.66933    | 2.23496   | 1.05584     | 1.49188    | 2.15923   | 2.0542     |
| EEF1A1P13 | 3.80029    | 4.07144   | 2.80353     | 3.52191    | 4.27243   | 4.54685    |
| EEF1A1P16 | 0.748195   | 1.0027    | -0.278948   | 0.44579    | 1.08923   | 1.10988    |
| EEF1A1P19 | 2.86986    | 2.92106   | 2.35046     | 2.66208    | 3.22055   | 3.53481    |
| EEF1A1P22 | 0.230301   | 0.893393  | 0.242962    | -0.0273647 | 0.60826   | 0.670967   |
| EEF1A1P3  | 0.194264   | 0.165687  | 0.747284    | 0.833756   | -0.216342 | -0.0660754 |
| EEF1A1P4  | 1.58884    | 1.92036   | 1.22206     | 1.29747    | 1.60303   | 1.27747    |
| EEF1A1P5  | 11.298     | 11.1864   | 10.1272     | 10.6192    | 11.5588   | 11.9986    |
| EEF1A1P6  | 7.47466    | 7.61631   | 6.45598     | 7.06875    | 7.78012   | 8.137      |
| EEF1A1P9  | 0.0871233  | 1.20877   | -0.00587506 | 0.53438    | 0.774865  | 0.990178   |
| EEF1A2    | -4.37417   | -4.13839  | 2.74129     | 2.78296    | 3.88079   | 4.00926    |
| EEF1B2    | 5.79948    | 5.65948   | 4.55533     | 4.99317    | 6.19829   | 7.0001     |
| EEF1B2P3  | 6.19936    | 6.04487   | 5.06336     | 5.46192    | 6.65508   | 7.31514    |
| EEF1B2P6  | 3.74475    | 3.62671   | 2.51613     | 3.0256     | 4.04066   | 5.03992    |
| EEF1D     | 6.3881     | 6.17807   | 6.3028      | 6.54976    | 7.02045   | 7.06113    |
| EEF1DP1   | 2.44599    | 2.42099   | 2.39934     | 2.66153    | 3.0663    | 3.07495    |
| EEF1E1    | 4.14011    | 4.15641   | 3.26563     | 3.77665    | 4.68508   | 5.3951     |
| EEF1G     | 7.82914    | 7.79193   | 7.50658     | 7.90801    | 7.86489   | 7.99322    |
| EEF1GP1   | 1.38843    | 1.46201   | -0.0335267  | 0.591967   | 1.33409   | 1.68564    |
| EEF2      | 8.94811    | 8.76404   | 8.18969     | 8.47496    | 9.929     | 10.0852    |
| EEF2K     | 4.3984     | 4.42068   | 4.60763     | 4.60541    | 4.71483   | 4.39657    |
| EEF2KMT   | 2.39351    | 2.4233    | 2.55249     | 2.84473    | 2.67398   | 3.17766    |
| EEFSEC    | 1.01522    | 0.963482  | 1.34765     | 1.72409    | 1.42582   | 1.56944    |
| EEPD1     | 0.289705   | 0.265185  | 2.94576     | 2.74293    | 0.185296  | 0.293394   |
| EFCAB11   | 2.14956    | 2.3218    | 1.28413     | 1.35064    | 1.2586    | 2.10053    |
| EFCAB13   | 2.51675    | 2.59748   | 1.00557     | 0.883691   | 1.32189   | 1.06809    |
| EFCAB14   | 5.11353    | 5.81509   | 5.81761     | 6.83013    | 4.9       | 6.00732    |
| EFCAB2    | 1.31235    | 1.0353    | 1.64837     | 1.30552    | 1.70952   | 1.81687    |
| EFCAB7    | 3.01       | 2.82775   | 3.18353     | 3.20783    | 2.02621   | 2.62869    |
| EFEMP1    | 7.15244    | 6.56159   | 2.693       | 1.8512     | 6.44707   | 6.52659    |
| EFEMP2    | 3.80077    | 3.24279   | 5.15687     | 5.226      | 0.932212  | 0.463298   |
| EFHC1     | 3.76444    | 3.93161   | 4.18825     | 4.22544    | 4.22158   | 4.26051    |
| EFHD2     | 3.4029     | 2.96552   | 3.89729     | 4.02816    | 5.08745   | 4.85647    |

|          |           |          |           |          |            |           |
|----------|-----------|----------|-----------|----------|------------|-----------|
| EFNA1    | 3.85839   | 3.57471  | 2.34788   | 2.67909  | 2.81137    | 3.11027   |
| EFNA3    | 1.66727   | 1.74176  | -0.736607 | 0.248838 | 0.293994   | 0.151378  |
| EFNA4    | 1.867     | 1.7171   | 1.93007   | 1.81601  | 1.20392    | 1.57873   |
| EFNA5    | 4.20478   | 4.16559  | 3.41824   | 3.15327  | 1.85935    | 2.15749   |
| EFNB1    | 1.66289   | 1.74664  | 3.65095   | 4.03072  | 0.578176   | 0.816919  |
| EFNB2    | 4.11068   | 4.35253  | -3.59683  | -1.93836 | 5.85956    | 5.92582   |
| EFR3A    | 4.68247   | 4.54907  | 5.37012   | 5.46289  | 5.75671    | 5.70953   |
| EFR3B    | 2.3426    | 2.24453  | -0.790968 | -0.52367 | 0.82357    | 0.863209  |
| EFTUD1   | 3.9884    | 4.17274  | 3.25735   | 3.71119  | 4.51859    | 4.6312    |
| EFTUD2   | 6.38217   | 6.4022   | 6.05373   | 6.53832  | 7.20147    | 7.16781   |
| EGF      | 0.915689  | 1.27191  | 4.23853   | 4.44     | 3.43377    | 3.27343   |
| EGFL7    | 1.12752   | 0.868134 | 1.37111   | 1.22214  | -0.878698  | -0.497069 |
| EGFL8    | 0.756588  | 0.209316 | 1.01656   | 1.02064  | 1.3822     | -0.115713 |
| EGFR     | 5.65389   | 5.71672  | 7.12314   | 7.41107  | 5.64285    | 5.46592   |
| EGFR-AS1 | 0.167268  | -0.41703 | 1.58427   | 1.4674   | -0.149775  | -0.917355 |
| EGLN1    | 6.01085   | 6.00551  | 4.27283   | 4.41668  | 6.24072    | 5.36407   |
| EGLN2    | 4.4949    | 4.37393  | 4.47199   | 4.62076  | 5.03096    | 5.13268   |
| EGLN3    | -0.721575 | -1.105   | 3.58796   | 3.42644  | 4.43442    | 4.31009   |
| EGR1     | 0.480917  | 0.013012 | 2.73535   | 2.30058  | -0.338214  | -0.214706 |
| EGR3     | 2.07902   | 2.37006  | -4.59508  | -3.30006 | -5.65305 ? |           |
| EHBP1    | 5.99515   | 5.8143   | 5.44782   | 5.37453  | 5.94766    | 5.90765   |
| EHBP1L1  | 5.35485   | 5.27861  | 4.99388   | 4.99446  | -1.41201   | -2.8983   |
| EHD1     | 4.69161   | 4.52157  | 4.00629   | 4.26839  | 4.29606    | 4.06147   |
| EHD2     | 2.06581   | 1.40138  | 3.86768   | 3.35471  | 2.66837    | 1.70271   |
| EHD3     | 4.00481   | 4.52798  | 2.23434   | 2.88836  | 0.197777   | 1.23585   |
| EHD4     | 5.30163   | 5.40944  | 3.38063   | 4.10791  | 5.39598    | 5.08443   |
| EHF      | 0.944836  | -0.27286 | -3.18222  | -2.30078 | 4.20773    | 3.89691   |
| EHHADH   | 1.66289   | 1.766    | 1.0357    | 1.01017  | -0.412205  | -0.662104 |
| EHMT1    | 4.36801   | 4.22341  | 4.33827   | 4.29039  | 4.34191    | 3.92507   |
| EHMT2    | 4.35348   | 4.41749  | 4.1429    | 4.36081  | 4.48178    | 4.57057   |
| EI24     | 5.48393   | 5.8234   | 4.95082   | 5.69971  | 5.3495     | 5.96608   |
| EI24P2   | 0.710102  | 0.963733 | -0.322682 | 0.564515 | 0.373208   | 0.227026  |
| EID1     | 6.94613   | 6.94199  | 6.49679   | 6.83715  | 7.06997    | 7.06479   |
| EID2     | 2.55832   | 1.9295   | 2.34397   | 1.89682  | 2.67062    | 1.68564   |
| EID2B    | 1.54413   | 1.52587  | 1.24279   | 1.4458   | 1.22848    | 1.08775   |
| EID3     | 1.867     | 1.68694  | 4.50909   | 4.20405  | 1.88275    | 0.965773  |
| EIF1     | 5.79288   | 5.80478  | 5.92338   | 6.30985  | 6.43965    | 6.81558   |
| EIF1AD   | 4.46757   | 4.33026  | 3.74869   | 3.95592  | 3.70272    | 3.27628   |
| EIF1AX   | 5.60351   | 5.64156  | 4.77039   | 5.19486  | 5.09868    | 5.00381   |
| EIF1AXP1 | 3.91391   | 3.88538  | 3.04622   | 3.60738  | 3.44577    | 3.74926   |
| EIF1B    | 2.84589   | 3.00272  | 2.44948   | 2.69531  | 2.77224    | 3.19416   |
| EIF2A    | 5.25979   | 5.32086  | 5.23528   | 5.68342  | 6.14359    | 6.62221   |
| EIF2AK1  | 5.54832   | 5.49246  | 5.54017   | 5.76599  | 6.09956    | 6.15375   |
| EIF2AK2  | 5.7269    | 5.78367  | 6.21422   | 6.33898  | 6.94948    | 6.59127   |
| EIF2AK3  | 4.31671   | 4.39487  | 4.13471   | 4.53013  | 4.91796    | 5.02503   |
| EIF2AK4  | 6.45685   | 6.39104  | 5.29018   | 5.68558  | 5.48207    | 5.49297   |
| EIF2B1   | 5.31575   | 5.35243  | 4.10692   | 4.48068  | 5.47375    | 5.54205   |
| EIF2B2   | 4.58115   | 4.48019  | 3.40572   | 3.71541  | 4.32618    | 4.46558   |
| EIF2B3   | 3.58325   | 3.61407  | 4.16278   | 4.53503  | 3.78447    | 4.30333   |
| EIF2B4   | 4.35688   | 4.33235  | 3.33415   | 3.68071  | 4.23116    | 4.24893   |
| EIF2B5   | 4.74593   | 4.801    | 4.90194   | 5.27864  | 5.48562    | 5.52749   |
| EIF2D    | 4.26525   | 4.07728  | 4.19368   | 4.38402  | 4.4888     | 4.56475   |



|           |            |          |          |           |          |          |
|-----------|------------|----------|----------|-----------|----------|----------|
| EIF2S1    | 6.25931    | 6.49983  | 5.05111  | 5.64668   | 6.32735  | 6.83977  |
| EIF2S2    | 6.2179     | 6.25025  | 5.82562  | 6.26951   | 5.97906  | 6.45144  |
| EIF2S2P3  | 2.07643    | 2.00033  | 1.67229  | 2.15859   | 1.96263  | 2.16285  |
| EIF2S2P4  | 5.62062    | 5.62124  | 5.20833  | 5.77698   | 5.47266  | 5.91394  |
| EIF2S3    | 6.3698     | 6.49025  | 5.94785  | 6.27468   | 6.33552  | 6.11101  |
| EIF2S3L   | 5.36682    | 5.4369   | 4.88285  | 5.15365   | 5.36329  | 5.34729  |
| EIF3A     | 7.88921    | 7.85318  | 7.4972   | 7.79662   | 8.38995  | 7.96467  |
| EIF3B     | 6.99798    | 6.96771  | 6.84697  | 7.24923   | 7.32213  | 7.21438  |
| EIF3C     | 7.31396    | 7.24764  | 6.33847  | 6.67118   | 6.70354  | 6.53911  |
| EIF3CL    | 6.26765    | 6.39392  | 5.27473  | 5.61474   | 5.63333  | 5.53587  |
| EIF3D     | 6.29012    | 6.40751  | 5.7226   | 6.28052   | 6.40088  | 6.5665   |
| EIF3E     | 6.5723     | 6.52604  | 6.04574  | 6.43337   | 6.7362   | 7.81634  |
| EIF3EP1   | 3.83498    | 3.98621  | 3.13959  | 3.48218   | 3.90401  | 4.76659  |
| EIF3F     | 5.2626     | 5.3569   | 4.84839  | 5.20495   | 4.791    | 5.13096  |
| EIF3FP1   | 3.36983    | 3.41895  | 1.92702  | 2.00677   | -3.65898 | -3.63411 |
| EIF3FP3   | 4.49226    | 4.63254  | 3.98986  | 4.62916   | 4.27606  | 4.6417   |
| EIF3G     | 5.36437    | 5.32698  | 4.48514  | 4.8688    | 6.14168  | 6.44558  |
| EIF3H     | 6.1456     | 6.16673  | 5.74388  | 6.24848   | 6.53612  | 7.09559  |
| EIF3I     | 6.85876    | 6.92612  | 5.89822  | 6.54827   | 7.74442  | 8.06068  |
| EIF3IP1   | -0.0695851 | 0.265185 | -1.26853 | -0.585061 | 0.919081 | 0.668401 |
| EIF3J     | 5.35646    | 5.34762  | 4.63389  | 4.89297   | 5.60206  | 5.70571  |
| EIF3J-AS1 | 1.68217    | 1.66382  | 1.24378  | 1.31796   | 1.44828  | 1.45967  |
| EIF3K     | 5.38629    | 5.40678  | 5.05428  | 5.59679   | 6.41322  | 6.87117  |
| EIF3L     | 7.30752    | 7.28225  | 6.30038  | 6.72554   | 6.98159  | 7.33956  |
| EIF3LP1   | 1.62311    | 1.53842  | 0.72472  | 1.1942    | 1.55202  | 1.53306  |
| EIF3LP2   | 1.47552    | 1.52731  | 0.458224 | 0.907214  | 0.629557 | 0.877744 |
| EIF3M     | 6.19683    | 6.23637  | 5.89585  | 6.29558   | 7.18533  | 7.89062  |
| EIF4A1    | 8.61759    | 8.64799  | 7.90411  | 8.40213   | 9.27198  | 9.51394  |
| EIF4A1P10 | 6.77471    | 6.83292  | 5.95041  | 6.59915   | 7.4359   | 7.60982  |
| EIF4A1P2  | 5.06205    | 5.21585  | 4.34503  | 4.96355   | 5.74915  | 5.95314  |
| EIF4A1P4  | 1.77819    | 2.14002  | 0.956324 | 1.83546   | 2.40671  | 2.70701  |
| EIF4A2    | 7.18329    | 7.21457  | 7.63206  | 7.84293   | 8.32064  | 8.56582  |
| EIF4A2P4  | 1.47227    | 1.84932  | 2.09193  | 2.4069    | 2.99656  | 3.01364  |
| EIF4A3    | 5.52584    | 5.63978  | 4.59619  | 5.16204   | 5.50489  | 5.71376  |
| EIF4B     | 8.17032    | 8.2425   | 7.22692  | 7.6191    | 7.62501  | 7.90762  |
| EIF4BP3   | 4.3277     | 4.42024  | 3.28233  | 3.75278   | 3.69043  | 3.82384  |
| EIF4BP6   | 5.79947    | 5.81585  | 4.82737  | 5.15348   | 5.15225  | 5.33977  |
| EIF4BP7   | 5.39008    | 5.41101  | 4.37891  | 4.72793   | 4.71767  | 4.98176  |
| EIF4E     | 4.90481    | 5.05063  | 4.83685  | 4.96939   | 5.25744  | 4.97933  |
| EIF4E2    | 5.18886    | 5.13337  | 4.82103  | 5.02788   | 5.93994  | 6.0546   |
| EIF4E3    | -2.30606   | -2.76144 | 3.9889   | 4.19153   | -2.26731 | -3.12051 |
| EIF4EBP1  | 4.96932    | 5.0553   | 3.50298  | 4.22769   | 4.66888  | 4.81488  |
| EIF4EBP2  | 5.61464    | 5.25525  | 5.45354  | 5.49942   | 5.76804  | 5.46945  |
| EIF4ENIF1 | 3.82988    | 3.67712  | 3.59729  | 3.66686   | 3.35551  | 3.06333  |
| EIF4EP2   | 4.61102    | 4.63249  | 4.13474  | 4.50141   | 4.83263  | 5.22483  |
| EIF4G1    | 7.86065    | 7.81342  | 8.2216   | 8.39811   | 8.86701  | 8.56729  |
| EIF4G2    | 8.52579    | 8.2984   | 8.04752  | 8.23758   | 8.37882  | 8.48394  |
| EIF4G3    | 5.70816    | 5.73895  | 5.8926   | 6.06547   | 6.17376  | 6.12102  |
| EIF4H     | 7.07372    | 6.9949   | 7.16564  | 7.56503   | 7.77107  | 7.65835  |
| EIF4HP1   | 4.50417    | 4.49789  | 4.71568  | 5.063     | 5.22075  | 4.99514  |
| EIF5      | 7.16549    | 7.17183  | 6.15468  | 6.48476   | 7.21243  | 7.52615  |
| EIF5A     | 6.8284     | 6.70623  | 6.42651  | 6.82831   | 7.45855  | 7.63116  |

|          |          |           |           |           |            |           |
|----------|----------|-----------|-----------|-----------|------------|-----------|
| EIF5A2   | 2.43536  | 3.037     | -3.01245  | -3.78492  | 3.89235    | 4.41998   |
| EIF5AL1  | 5.7638   | 5.65934   | 5.4131    | 5.78213   | 6.43386    | 6.56161   |
| EIF5AP4  | 1.11742  | 1.23089   | 0.880137  | 1.31063   | 1.9181     | 1.58531   |
| EIF5B    | 6.13851  | 6.07604   | 5.43617   | 5.60946   | 6.11726    | 5.86669   |
| EIF5P1   | 1.88009  | 2.03699   | 0.722553  | 1.07141   | 1.9885     | 2.09972   |
| EIF6     | 6.23865  | 6.29944   | 5.16314   | 5.94397   | 5.94284    | 6.54489   |
| ELAC1    | 2.01     | 2.29872   | 1.55122   | 1.86971   | -0.0602619 | 0.270565  |
| ELAC2    | 4.98171  | 4.93482   | 5.2285    | 5.53502   | 6.05263    | 5.93307   |
| ELAVL1   | 5.05204  | 5.00579   | 4.68683   | 4.82339   | 5.59971    | 5.34584   |
| ELAVL2   | 1.12115  | 1.02102   | -0.510905 | -0.823182 | -0.637731  | -0.183001 |
| ELF1     | 3.55789  | 3.47257   | 3.30246   | 3.82271   | 3.47713    | 3.69417   |
| ELF2     | 4.2867   | 4.23051   | 4.56716   | 4.52587   | 4.29086    | 4.53151   |
| ELF4     | 2.94478  | 2.45901   | 4.08091   | 4.38603   | 4.89761    | 4.80305   |
| ELFN2    | -3.22536 | -3.13966  | 2.88795   | 2.9052    | -0.121008  | -0.495888 |
| ELK1     | 3.83716  | 3.71082   | 2.56468   | 2.9301    | 3.24958    | 3.26771   |
| ELK3     | 5.91992  | 5.96557   | 4.71875   | 4.84736   | 4.79227    | 4.89613   |
| ELK4     | 5.73955  | 5.82454   | 5.62711   | 5.75519   | 6.03059    | 6.14291   |
| ELL      | 2.09535  | 1.71211   | 2.09727   | 2.11036   | 2.15028    | 2.11348   |
| ELL2     | 4.42285  | 4.5549    | 7.63541   | 7.73395   | 6.58026    | 6.66484   |
| ELL2P1   | 0.933089 | 1.35511   | 3.71352   | 4.06174   | 3.10681    | 3.396     |
| ELMO1    | 2.08551  | 1.7708    | -1.09576  | -0.938639 | 2.54915    | 2.354     |
| ELMO2    | 4.52659  | 4.61061   | 4.82625   | 5.19837   | 3.89119    | 4.01096   |
| ELMOD1   | -2.37642 | -2.00285  | -4.59508  | -5.10387  | 1.83956    | 2.53647   |
| ELMOD2   | 4.25584  | 4.035     | 4.34199   | 4.24321   | 4.96402    | 4.84979   |
| ELMOD3   | 3.079    | 3.04891   | 3.3923    | 3.49851   | 3.22539    | 2.83273   |
| ELMSAN1  | 4.7807   | 4.59852   | 4.55625   | 4.5123    | 4.13977    | 3.24748   |
| ELOF1    | 4.05662  | 3.82833   | 2.92239   | 3.31113   | 4.76385    | 4.49541   |
| ELOVL1   | 5.00567  | 5.08596   | 5.1457    | 5.64188   | 5.36724    | 5.74962   |
| ELOVL2   | 3.72298  | 3.72574   | -3.59683  | -3.78492  | -0.0163223 | -0.577229 |
| ELOVL4   | 3.56887  | 3.91327   | 0.156448  | 0.491176  | 1.70166    | 2.35939   |
| ELOVL5   | 6.85112  | 6.70246   | 7.33259   | 7.5433    | 8.8632     | 8.77443   |
| ELOVL6   | 4.15423  | 4.18641   | 5.1134    | 5.52959   | 6.14903    | 6.50883   |
| ELOVL7   | 1.63634  | 1.45605 ? |           | -4.10635  | -0.0163208 | 0.270672  |
| ELP2     | 5.22015  | 5.33826   | 4.62008   | 4.85397   | 4.55433    | 4.71689   |
| ELP3     | 4.12747  | 4.21311   | 3.75752   | 4.29418   | 3.93215    | 4.04984   |
| ELP4     | 1.71034  | 1.94232   | 2.41268   | 2.81302   | 2.79912    | 3.42      |
| ELP5     | 3.84394  | 3.8969    | 3.58796   | 4.05482   | 4.31267    | 4.54239   |
| ELP6     | 4.08963  | 4.05481   | 3.12026   | 3.35878   | 4.05135    | 4.63979   |
| EMB      | 3.64112  | 3.99192 ? |           | -6.09892  | -6.64581 ? |           |
| EMC1     | 6.62166  | 6.58055   | 6.42995   | 6.6325    | 6.76816    | 6.4751    |
| EMC10    | 4.80405  | 4.64708   | 2.09785   | 2.23548   | 4.88731    | 5.23276   |
| EMC2     | 3.74179  | 3.74295   | 3.33415   | 3.5968    | 3.40712    | 3.83631   |
| EMC3     | 4.98495  | 4.98372   | 4.94151   | 5.42701   | 5.51706    | 6.01552   |
| EMC3-AS1 | 2.48939  | 2.31523   | 2.67644   | 2.71206   | 2.51016    | 1.50637   |
| EMC4     | 5.21333  | 5.12757   | 4.63932   | 4.9909    | 5.00151    | 5.33932   |
| EMC6     | 2.35883  | 2.35013   | 2.54451   | 2.69109   | 3.26837    | 3.75699   |
| EMC7     | 4.99656  | 5.02197   | 4.52123   | 5.04282   | 4.84452    | 5.31426   |
| EMC8     | 3.95465  | 3.96656   | 3.70521   | 3.99052   | 3.77118    | 4.01268   |
| EMC9     | 1.26928  | 1.27439   | 1.16681   | 1.33305   | 2.33386    | 2.43521   |
| EMD      | 3.1211   | 2.89251   | 2.87988   | 3.19267   | 3.51086    | 3.5293    |
| EME1     | 4.07811  | 4.05085   | 4.20172   | 4.46657   | 3.30507    | 2.92274   |
| EME2     | 2.89064  | 2.9613    | 2.96549   | 2.99618   | 2.7815     | 2.40132   |

|              |           |           |            |              |           |           |
|--------------|-----------|-----------|------------|--------------|-----------|-----------|
| EMG1         | 5.472     | 5.44535   | 4.65013    | 5.02154      | 4.60811   | 4.87577   |
| EMILIN1      | 5.58313   | 4.87811   | -1.72363   | -2.40763     | -3.6585   | -3.12051  |
| EMILIN2      | -1.8912   | -1.81849  | 1.77651    | 1.61913      | 1.22848   | 1.06153   |
| EML1         | 3.78976   | 3.96236   | 2.76485    | 3.30692      | 4.69503   | 5.0101    |
| EML2         | 2.57613   | 2.54074   | -2.48229   | -2.10822     | -0.551587 | -0.464246 |
| EML3         | 3.87301   | 3.45274   | 3.11314    | 3.0492       | 3.31899   | 3.35267   |
| EML4         | 5.57274   | 5.64384   | 5.73867    | 5.79561      | 6.26383   | 6.05791   |
| EML5         | 5.07664   | 4.88121   | 1.92135    | 1.9487       | 3.00003   | 3.41103   |
| EML6         | 2.76853   | 2.89911   | 2.01126    | 1.95189      | 2.27929   | 2.35939   |
| EMP1         | 4.28463   | 5.02699   | 3.74573    | 5.78447      | 4.00945   | 4.72164   |
| EMP2         | 6.29555   | 6.10118   | 5.79085    | 5.92801      | 3.89411   | 3.86124   |
| EMP3         | 4.53513   | 4.51585   | 5.05068    | 5.42935      | 4.42582   | 4.91808   |
| EN1          | 0.727258  | 0.318612  | -0.138983  | -0.108685    | 1.31128   | 1.04823   |
| ENAH         | 6.77321   | 6.78505   | 6.42561    | 6.88885      | 8.24288   | 8.09173   |
| ENC1         | 5.15777   | 5.25059   | 4.56035    | 5.12512      | 6.83329   | 6.74725   |
| ENDOD1       | 4.60754   | 5.12867   | 3.34396    | 3.83954      | 4.9484    | 5.47132   |
| ENDOV        | 2.01175   | 1.80397   | 2.50997    | 2.58467      | 1.68845   | 1.34861   |
| ENG          | 3.65049   | 3.4357    | 5.74722    | 5.52381      | 0.0122397 | -0.214707 |
| ENGASE       | 3.89337   | 3.53856   | 3.69912    | 3.58292      | 3.11283   | 2.56942   |
| ENKD1        | 1.77668   | 1.5651    | 1.99641    | 1.99448      | 2.59473   | 2.83445   |
| ENO1         | 9.64694   | 9.65119   | 9.72085    | 10.2207      | 10.9418   | 10.898    |
| ENO1-IT1     | -0.611409 | -0.734698 | -0.0541032 | -0.000171691 | 1.04711   | 0.359476  |
| ENO1P1       | 5.15081   | 5.37776   | 5.47673    | 5.93471      | 6.62789   | 6.18257   |
| ENO2         | 3.99265   | 3.86021   | 3.62222    | 4.06484      | 5.37515   | 4.13249   |
| ENO3         | 1.43178   | 1.17331   | 0.901788   | 0.649303     | 0.265761  | 0.166741  |
| ENOPH1       | 4.19875   | 4.20159   | 3.583      | 4.03327      | 4.65198   | 4.86407   |
| ENOSF1       | 4.16047   | 4.06011   | 2.923      | 2.94882      | 2.47488   | 2.17878   |
| ENOX1        | 1.43538   | 1.16656   | 0.474784   | 0.736735     | 0.339787  | 1.17598   |
| ENOX2        | 2.74594   | 2.72945   | 1.89865    | 2.30481      | 3.64689   | 3.89691   |
| ENPP1        | 3.92389   | 4.05973   | 2.18282    | 2.44961      | 3.45473   | 4.32808   |
| ENPP2        | 2.41207   | 1.68694   | 2.03082    | 1.96801      | -2.75246  | -2.53597  |
| ENPP4        | 3.55476   | 3.66772   | -4.59508   | -4.10635     | -4.07293  | -4.11926  |
| ENSA         | 6.20914   | 6.24479   | 5.34331    | 5.72395      | 6.11808   | 6.43448   |
| ENSAP2       | 2.92446   | 2.95004   | 2.09859    | 2.5575       | 3.3061    | 3.72748   |
| ENTHD2       | 3.12832   | 2.88889   | 2.73734    | 3.03945      | 2.34466   | 2.03633   |
| ENTPD1       | 4.52566   | 4.5714    | 3.44459    | 3.49357      | 3.75357   | 3.66015   |
| ENTPD1-AS1   | 1.6352    | 1.66555   | 1.04909    | 0.794087     | 1.665     | 1.36753   |
| ENTPD4       | 5.98086   | 6.0275    | 5.87386    | 5.88483      | 5.67427   | 5.6398    |
| ENTPD5       | 3.5062    | 3.48633   | 2.73296    | 2.98692      | 3.19275   | 3.22503   |
| ENTPD6       | 7.32027   | 6.99435   | 4.5929     | 4.64271      | 5.65868   | 5.53882   |
| ENTPD7       | 4.20326   | 4.64425   | 3.84846    | 4.18688      | 4.14607   | 4.48804   |
| ENY2         | 4.94476   | 4.7963    | 4.18167    | 4.41669      | 4.74429   | 5.22544   |
| EOGT         | 4.02286   | 4.16377   | 3.07387    | 3.23769      | 3.07441   | 2.90062   |
| EP300        | 5.04448   | 4.79217   | 5.45671    | 5.38252      | 5.09957   | 4.91442   |
| EP400        | 5.2191    | 5.06953   | 5.08384    | 4.86615      | 4.51211   | 4.35925   |
| EP400NL      | 3.0165    | 2.97587   | 3.62541    | 3.39936      | 2.2851    | 1.66045   |
| EPAS1        | 2.68031   | 1.85459   | 6.01766    | 6.34134      | 6.06374   | 5.63313   |
| EPB41        | 5.2605    | 5.13067   | 4.55614    | 4.69005      | 5.34385   | 4.97216   |
| EPB41L1      | 3.15891   | 2.99454   | 4.07622    | 4.25092      | 1.7406    | 1.79316   |
| EPB41L2      | 6.47427   | 6.55047   | 5.29068    | 5.33825      | 7.01465   | 6.65276   |
| EPB41L4A     | 1.58544   | 1.61282   | -1.33115   | -0.919771    | 1.86382   | 1.57805   |
| EPB41L4A-AS1 | 3.61062   | 3.59409   | 2.70255    | 2.93974      | 3.25387   | 3.22424   |

|             |          |           |            |          |           |           |
|-------------|----------|-----------|------------|----------|-----------|-----------|
| EPB41L5     | 4.0202   | 3.67144   | 3.80361    | 3.53498  | 3.53658   | 3.19717   |
| EPC1        | 3.37723  | 3.33915   | 3.59138    | 3.33797  | 3.9972    | 3.9051    |
| EPC2        | 4.08228  | 4.00781   | 3.36915    | 3.20179  | 3.91238   | 3.81488   |
| EPDR1       | 4.748    | 5.01135   | 5.135      | 5.37651  | 5.42479   | 5.51306   |
| EPG5        | 5.56243  | 5.44065   | 4.86429    | 5.17079  | 3.74802   | 3.71323   |
| EPHA2       | 5.88585  | 5.88641   | 5.67948    | 6.19838  | 6.50758   | 6.59733   |
| EPHA3       | 2.62286  | 2.60594   | -4.59508 ? |          | 7.7726    | 8.30936   |
| EPHA4       | 4.30342  | 4.56773   | 6.31989    | 5.82034  | 3.78526   | 3.51682   |
| EPHA5       | -0.52896 | -0.681268 | -3.12632   | -2.64879 | 5.68306   | 6.01142   |
| EPHB2       | 3.1131   | 2.9423    | 5.52985    | 6.00262  | 4.37381   | 4.38999   |
| EPHB3       | 2.27248  | 1.95924   | 1.84441    | 1.30061  | 1.79504   | 1.23585   |
| EPHB4       | 4.66941  | 4.47084   | 3.54609    | 3.56005  | 4.37586   | 4.32395   |
| EPHX1       | 3.08392  | 2.82257   | 7.3609     | 7.57011  | 5.7678    | 5.5424    |
| EPM2A       | 0.696492 | 1.2616    | 1.21549    | 1.5363   | 1.49319   | 1.9654    |
| EPM2AIP1    | 4.85933  | 4.87644   | 4.87378    | 4.9773   | 5.2085    | 5.17439   |
| EPN1        | 3.94657  | 3.67671   | 4.24898    | 4.27163  | 4.927     | 4.71324   |
| EPN2        | 3.87606  | 3.90873   | 3.6585     | 3.76968  | 4.23557   | 4.33626   |
| EPOR        | 1.51041  | 1.52019   | 1.44587    | 1.81601  | 0.807363  | 1.18815   |
| EPRS        | 7.02887  | 7.09798   | 6.61712    | 7.07538  | 7.26185   | 7.59347   |
| EPS15       | 5.27566  | 5.42549   | 5.37869    | 5.726    | 5.38438   | 5.73571   |
| EPS15L1     | 3.13381  | 3.12774   | 3.6541     | 3.71454  | 4.08955   | 3.53646   |
| EPS8        | 6.17225  | 5.8089    | 4.29018    | 4.93487  | 5.17652   | 5.68666   |
| EPSTI1      | -5.69162 | -4.13839  | 1.89332    | 1.93559  | 3.39632   | 3.54358   |
| EPT1        | 6.50357  | 6.62912   | 5.7758     | 6.12091  | 5.9981    | 6.1117    |
| ERAL1       | 3.72298  | 3.63255   | 3.79661    | 4.11397  | 4.20849   | 4.07955   |
| ERAP1       | 5.60112  | 5.71419   | 6.82795    | 6.9972   | 5.36763   | 5.2796    |
| ERAP2       | 3.93209  | 4.28114   | 7.33693    | 7.6451   | 4.62625   | 4.94343   |
| ERBB2       | 6.3706   | 7.20902   | 4.54385    | 4.62349  | -0.249757 | -0.746255 |
| ERBB2IP     | 6.62564  | 6.6215    | 6.77741    | 6.91109  | 7.46863   | 7.79497   |
| ERBB3       | 7.98277  | 7.68628   | -0.825729  | -1.46458 | -1.48999  | -1.61882  |
| ERC1        | 6.10443  | 6.04494   | 5.96875    | 5.91976  | 5.43441   | 5.04565   |
| ERCC1       | 5.2486   | 5.23646   | 4.33466    | 4.70805  | 5.29395   | 5.56546   |
| ERCC2       | 3.81059  | 3.34129   | 3.6206     | 3.57416  | 5.50451   | 4.94057   |
| ERCC3       | 5.42537  | 5.50003   | 4.62865    | 5.02431  | 5.44786   | 5.49293   |
| ERCC4       | 3.59225  | 3.66313   | 3.6897     | 3.97852  | 3.2836    | 3.12765   |
| ERCC5       | 3.82143  | 3.7543    | 4.71289    | 4.80155  | 4.32831   | 4.1341    |
| ERCC6       | 3.83627  | 4.17096   | 3.05149    | 2.99604  | 3.83811   | 3.69273   |
| ERCC6-PGBD3 | 2.97323  | 3.00682   | 1.80757    | 1.97321  | 1.76693   | 1.78241   |
| ERCC6L      | 4.3777   | 4.64373   | 4.20449    | 4.53592  | 4.56548   | 4.81879   |
| ERCC6L2     | 5.24372  | 5.25988   | 4.6342     | 4.57399  | 4.98829   | 5.12198   |
| ERCC8       | 2.43303  | 2.68075   | 3.14273    | 3.32498  | 3.4452    | 4.2103    |
| EREG        | 3.28106  | 3.90783   | -0.723865  | 0.491176 | -1.26766  | -1.31405  |
| ERF         | 3.97068  | 3.65479   | 2.78803    | 2.91632  | 4.42315   | 4.45315   |
| ERGIC1      | 6.13085  | 6.22775   | 6.29273    | 6.86272  | 6.88648   | 7.03793   |
| ERGIC2      | 5.58872  | 5.51419   | 5.21947    | 5.33203  | 5.15745   | 5.71903   |
| ERGIC3      | 7.61482  | 7.55689   | 6.7243     | 7.0447   | 6.77295   | 7.07174   |
| ERH         | 5.68691  | 5.83547   | 4.53964    | 5.04211  | 5.6775    | 6.13127   |
| ERHP1       | 0.826437 | 0.921261  | -0.239995  | 0.384956 | 1.06101   | 1.1015    |
| ERI1        | 3.92205  | 4.04197   | 3.91977    | 4.20178  | 4.37381   | 4.4607    |
| ERI2        | 3.12276  | 3.13504   | 3.52787    | 3.73161  | 3.5457    | 3.73359   |
| ERI3        | 4.20704  | 4.19626   | 4.56633    | 4.87913  | 4.62565   | 5.10706   |
| ERIC11      | 1.52013  | 1.06077   | 2.18718    | 2.19497  | 2.24057   | 2.2002    |

|          |           |            |           |           |           |           |
|----------|-----------|------------|-----------|-----------|-----------|-----------|
| ERLEC1   | 5.04738   | 5.26253    | 4.14852   | 4.84027   | 5.167     | 5.92581   |
| ERLIN1   | 5.08759   | 5.14632    | 5.42287   | 5.75729   | 5.37276   | 5.48249   |
| ERLIN2   | 5.22607   | 4.94547    | 5.16631   | 5.11938   | 5.24206   | 4.80503   |
| ERMAP    | 2.15638   | 2.18556    | 2.58162   | 2.77269   | 2.16507   | 1.89403   |
| ERMARD   | 2.23758   | 2.1408     | 2.58467   | 2.47615   | 2.66613   | 3.09742   |
| ERMP1    | 4.04482   | 4.28125    | 5.17416   | 5.15002   | 4.59563   | 4.80577   |
| ERN1     | 2.40946   | 2.3413     | 2.42382   | 2.74605   | 2.73202   | 2.36476   |
| ERO1A    | 5.68569   | 5.98267    | 4.46663   | 5.17888   | 5.41716   | 5.59706   |
| ERO1B    | 4.65241   | 4.38968    | 2.5512    | 2.66597   | 1.57335   | 1.77713   |
| ERP29    | 6.59048   | 6.38952    | 5.20949   | 5.40506   | 5.79277   | 5.59884   |
| ERP29P1  | 3.13764   | 3.01263    | 1.86846   | 1.89927   | 2.38575   | 1.91932   |
| ERP44    | 4.66762   | 4.544      | 4.77491   | 4.95512   | 4.43872   | 4.55133   |
| ERRFI1   | 4.78724   | 4.94919    | 7.06183   | 6.84881   | 5.99029   | 5.7522    |
| ERV3-1   | 1.57267   | 1.48737    | 3.72515   | 3.22758   | 1.4936    | 0.416332  |
| ERVFRD-1 | 1.57708   | 1.84552    | 1.80519   | 1.37503   | 1.89046   | 0.993783  |
| ERVK3-1  | 4.71017   | 4.6992     | 4.17879   | 4.42322   | 5.25392   | 5.36155   |
| ERVW-1   | -0.816197 | -0.0703908 | 1.34008   | 1.33416   | 0.766027  | -0.214706 |
| ESCO1    | 4.5828    | 4.70336    | 3.88122   | 4.04347   | 4.66782   | 5.33769   |
| ESCO2    | 4.73345   | 4.99709    | 4.03806   | 4.4371    | 3.79501   | 4.04315   |
| ESD      | 4.80524   | 4.81443    | 4.50297   | 4.86416   | 4.79192   | 5.47443   |
| ESF1     | 5.40712   | 5.43841    | 4.61493   | 4.9246    | 4.83903   | 5.1567    |
| ESPL1    | 5.69805   | 5.65187    | 4.61819   | 4.70975   | 4.20851   | 3.85552   |
| ESRRA    | 3.27277   | 3.03995    | 2.35714   | 2.79952   | 3.35403   | 4.24959   |
| ESRRG    | 1.13386   | 0.785149   | -4.59508  | -5.10387  | 1.11453   | 1.1637    |
| ESYT1    | 7.04553   | 6.99294    | 5.74984   | 5.95391   | 5.844     | 5.64683   |
| ESYT2    | 6.50558   | 6.75414    | 6.23509   | 6.75051   | 5.50959   | 5.66398   |
| ESYT3    | 1.73974   | 1.44408    | -0.161008 | -0.154483 | -0.285108 | -0.619042 |
| ETAA1    | 3.99179   | 3.8969     | 4.10765   | 4.19837   | 4.27042   | 4.28622   |
| ETF1     | 7.24476   | 7.33467    | 6.48717   | 7.05646   | 7.49525   | 8.01393   |
| ETF1P2   | 3.01416   | 3.14373    | 2.66432   | 2.82332   | 3.16909   | 3.10113   |
| ETFFA    | 5.19155   | 5.18819    | 4.86495   | 5.11938   | 5.04834   | 5.4682    |
| ETFB     | 4.11418   | 4.14057    | 4.3115    | 4.6503    | 3.78934   | 4.24311   |
| ETFDH    | 2.74866   | 2.78088    | 3.13541   | 3.28483   | 3.02526   | 3.18852   |
| ETHE1    | 2.30775   | 2.18694    | 1.8702    | 2.48713   | 1.8334    | 2.59184   |
| ETNK1    | 5.78825   | 5.87169    | 5.27999   | 5.3557    | 5.573     | 5.2641    |
| ETNK2    | 2.87584   | 2.53569    | 3.17215   | 3.38493   | 3.35873   | 3.65197   |
| ETS1     | 6.17088   | 6.38714    | 7.27526   | 7.54381   | 6.01365   | 6.08565   |
| ETS2     | 3.1805    | 3.27693    | 3.3498    | 4.26295   | 3.83053   | 3.73829   |
| ETV1     | 5.45161   | 5.49279    | 0.225978  | 0.520618  | 3.91617   | 3.96217   |
| ETV3     | 5.58456   | 5.68495    | 4.2436    | 4.56969   | 4.54242   | 4.35127   |
| ETV4     | 4.26958   | 4.03001    | 1.94578   | 2.43422   | 0.159978  | -0.247125 |
| ETV5     | 5.49197   | 5.52903    | 4.90791   | 5.26891   | 5.42007   | 5.00235   |
| ETV6     | 4.77005   | 4.55117    | 4.49243   | 4.50219   | 4.67619   | 4.44683   |
| EVA1A    | 2.44048   | 2.52016    | 3.25319   | 4.11759   | 4.28146   | 5.19339   |
| EVA1B    | 0.704615  | 0.370767   | 0.614031  | 0.965197  | 1.15625   | 1.74748   |
| EVA1C    | 2.84009   | 2.81537    | -0.252626 | 0.46112   | 1.29393   | 1.70271   |
| EVC      | 4.07474   | 4.25617    | 4.37751   | 4.67616   | 3.90974   | 3.61227   |
| EVI2A    | 0.171399  | 0.395227   | 3.01654   | 3.83555   | 1.55968   | 2.57062   |
| EVI2B    | 0.80878   | 0.885949   | 2.68877   | 2.96511   | 1.43863   | 0.909466  |
| EVI5     | 5.56796   | 5.44139    | 4.84298   | 4.86703   | 4.83456   | 4.70584   |
| EVI5L    | 0.0954519 | -0.195907  | 2.4312    | 2.45343   | 1.5394    | 1.20023   |
| EVL      | 2.90438   | 2.30455    | 1.96568   | 1.23037   | 2.14952   | 1.23482   |

|           |           |            |           |           |           |          |
|-----------|-----------|------------|-----------|-----------|-----------|----------|
| EWSR1     | 7.30462   | 7.27655    | 7.3508    | 7.42647   | 7.0852    | 6.68703  |
| EXD2      | 3.42245   | 3.78627    | 2.45311   | 2.894     | 3.70053   | 3.97628  |
| EXO1      | 5.0699    | 5.19848    | 4.75015   | 5.00296   | 4.65767   | 4.99891  |
| EXO5      | 1.87907   | 2.22496    | 0.855208  | 1.13603   | 1.21062   | 1.03149  |
| EXOC1     | 4.15501   | 4.24536    | 4.41451   | 4.59073   | 6.01696   | 6.55831  |
| EXOC2     | 4.73867   | 4.88588    | 5.03079   | 5.29577   | 4.73896   | 4.78313  |
| EXOC3     | 4.71206   | 4.61251    | 4.39418   | 4.63659   | 4.95122   | 4.88922  |
| EXOC3-AS1 | 1.52978   | 1.14454    | 1.10193   | 1.21315   | 1.36764   | 0.847941 |
| EXOC4     | 5.75188   | 5.77706    | 5.45399   | 5.59594   | 5.58345   | 5.82954  |
| EXOC5     | 5.66353   | 5.81332    | 4.69257   | 4.99479   | 5.8503    | 5.98256  |
| EXOC5P1   | 2.84308   | 3.05655    | 1.79115   | 2.23321   | 3.08038   | 3.43196  |
| EXOC6     | 4.42565   | 4.65152    | 2.84715   | 3.14384   | 3.99074   | 4.60956  |
| EXOC6B    | 4.39696   | 4.33399    | 4.83258   | 4.76922   | 4.40443   | 4.36071  |
| EXOC7     | 6.1238    | 6.16409    | 5.90855   | 6.13814   | 6.77855   | 6.80971  |
| EXOC8     | 4.15175   | 4.26199    | 4.05612   | 4.48748   | 4.49598   | 4.39493  |
| EXOG      | 3.45826   | 3.57333    | 2.70218   | 2.81004   | 3.35232   | 3.45063  |
| EXOSC1    | 3.0658    | 2.98837    | 3.21308   | 3.63264   | 3.44952   | 3.90615  |
| EXOSC10   | 5.57537   | 5.4997     | 4.99378   | 5.31736   | 5.30102   | 5.12117  |
| EXOSC2    | 4.976     | 4.96966    | 4.38633   | 4.6864    | 4.3523    | 4.26339  |
| EXOSC3    | 4.09006   | 4.10701    | 3.17842   | 3.45532   | 5.14214   | 5.25752  |
| EXOSC4    | 2.72751   | 2.5945     | 1.57693   | 2.20852   | 3.41727   | 4.10707  |
| EXOSC5    | 2.65408   | 2.55397    | 1.57806   | 2.03075   | 3.31553   | 3.9281   |
| EXOSC6    | 4.52913   | 4.54768    | 4.28408   | 4.58552   | 5.74588   | 5.37143  |
| EXOSC7    | 3.88211   | 3.93054    | 3.24902   | 3.61147   | 4.19999   | 3.99198  |
| EXOSC8    | 3.653     | 3.68128    | 3.77718   | 4.04983   | 3.67596   | 3.8696   |
| EXOSC9    | 4.9606    | 4.90024    | 4.39589   | 4.62194   | 4.49353   | 4.72415  |
| EXPH5     | -0.359059 | -0.0876659 | 0.849967  | 1.15801   | 1.54918   | 1.23585  |
| EXT1      | 5.43724   | 5.37162    | 7.04226   | 7.03154   | 4.29097   | 4.18355  |
| EXT2      | 6.89295   | 6.83072    | 6.22825   | 6.54246   | 6.09017   | 6.21434  |
| EXTL1     | 5.31458   | 4.9749     | -2.86056  | -3.78492  | 0.0263185 | -0.4586  |
| EXTL2     | 4.51765   | 4.88364    | 4.14514   | 4.42058   | 5.21122   | 5.95236  |
| EXTL3     | 6.19505   | 6.03351    | 5.50863   | 5.3785    | 6.39127   | 6.18808  |
| EYA1      | -1.37679  | -0.655276  | 3.78659   | 3.34605   | -4.33548  | -5.69922 |
| EYA2      | ?         | ?          | -1.72363  | -0.716287 | 1.13416   | 1.20023  |
| EYA3      | 4.4589    | 4.49498    | 3.90128   | 3.98657   | 4.90002   | 4.71534  |
| EYA4      | 3.91924   | 3.82371    | 5.03261   | 5.33558   | 5.86619   | 6.06766  |
| EYS       | 2.27106   | 2.4428     | 0.662051  | 0.491176  | 1.00508   | 0.522196 |
| EZH1      | 4.36566   | 4.2625     | 3.92107   | 3.90798   | 4.4469    | 3.80108  |
| EZH2      | 5.12637   | 5.07611    | 5.15788   | 5.14783   | 5.09566   | 4.87709  |
| EZR       | 5.71505   | 5.70865    | 4.87037   | 5.54715   | 7.08174   | 7.14617  |
| F11R      | 1.8792    | 1.6959     | 2.83637   | 2.82649   | 4.71222   | 4.45859  |
| F2R       | 6.46377   | 6.38831    | 5.95121   | 5.95523   | 5.79423   | 6.07873  |
| F2RL1     | -4.37417  | -4.87366   | 2.17844   | 2.58118   | -5.65305  | -4.11926 |
| F2RL2     | 3.06248   | 3.00883    | 5.53969   | 5.55471   | 1.9581    | 2.68131  |
| F3        | 1.93394   | 2.51731    | 6.10015   | 5.94542   | 2.63662   | 2.2533   |
| F8        | 1.44058   | 1.99275    | 0.723445  | 1.13959   | 1.00538   | 2.00755  |
| F8A1      | 2.42553   | 2.19181    | 2.09069   | 2.07687   | 1.79252   | 1.64506  |
| F8A3      | -3.73066  | ?          | -0.196632 | 0.297931  | 1.65085   | 1.31192  |
| FAAP100   | 3.41075   | 3.3637     | 3.23433   | 3.28349   | 4.08535   | 4.31009  |
| FAAP20    | 2.59053   | 2.45058    | 2.83182   | 2.80104   | 3.01074   | 2.8576   |
| FAAP24    | 1.05586   | 0.920918   | 1.15638   | 1.34243   | 1.22848   | 1.2122   |
| FABP7     | 1.06916   | 1.53154    | -6.17309  | -6.09892  | 5.15504   | 5.8622   |

|           |            |             |           |           |            |           |
|-----------|------------|-------------|-----------|-----------|------------|-----------|
| FADD      | 3.65968    | 3.84323     | 2.85413   | 3.58596   | 2.97127    | 3.16951   |
| FADS1     | 7.91214    | 7.81748     | 7.16      | 7.63835   | 6.48171    | 6.93706   |
| FADS2     | 7.5125     | 7.18825     | 7.93879   | 8.26217   | 4.98372    | 4.97301   |
| FADS3     | 3.65847    | 3.60593     | 2.86361   | 3.43226   | 4.04359    | 3.8305    |
| FAF2      | 5.89664    | 5.73252     | 6.66958   | 6.82688   | 6.56609    | 6.19678   |
| FAH       | 3.20179    | 3.19715     | 3.75311   | 4.42936   | 3.59708    | 4.09094   |
| FAHD1     | 2.7542     | 2.83866     | 2.8403    | 3.4775    | 2.91044    | 3.3992    |
| FAHD2A    | 3.32069    | 3.23834     | 3.17889   | 3.41148   | 4.10335    | 4.2291    |
| FAHD2B    | 1.21257    | 1.17486     | -0.515858 | -0.478047 | 1.19335    | 1.3126    |
| FAIM      | 1.90086    | 1.7708      | 1.60441   | 1.58469   | 0.0540566  | 0.522196  |
| FAIM2     | -1.52875   | -0.354151   | 0.355738  | 1.59857   | -1.13645   | 0.993783  |
| FAM101B   | 1.15895    | 0.013012    | 4.78873   | 4.81968   | -6.64581 ? |           |
| FAM102A   | 2.5802     | 2.5528      | 2.60982   | 3.06165   | 2.52866    | 2.3963    |
| FAM102B   | 4.09289    | 4.42287     | 3.56969   | 3.85407   | 1.72343    | 2.00756   |
| FAM103A1  | 3.43204    | 3.49096     | 2.49935   | 2.9332    | 3.84792    | 4.13933   |
| FAM103A2P | 2.57238    | 2.45146     | 1.70903   | 1.99534   | 3.11008    | 3.00728   |
| FAM104A   | 4.03714    | 4.05134     | 4.57619   | 5.01787   | 5.36812    | 5.61928   |
| FAM104B   | 1.27825    | 1.12217     | 0.571444  | 0.685662  | 1.81139    | 2.11985   |
| FAM105A   | 0.183671   | -0.00328298 | 2.81084   | 2.87702   | -1.45047   | -1.70626  |
| FAM106A   | ?          | ?           | 1.5375    | 1.17718   | 0.833441   | -0.104544 |
| FAM107B   | 3.98391    | 4.16376     | 3.52728   | 4.48175   | 3.05222    | 3.10707   |
| FAM109A   | 1.98394    | 1.94657     | 1.39394   | 1.41477   | 0.939663   | 0.359476  |
| FAM109B   | 2.6911     | 2.36689     | 1.88259   | 1.97335   | -4.07293   | -4.11926  |
| FAM110A   | -0.223172  | 0.060836    | 0.871828  | 1.03078   | -1.44343   | -0.848487 |
| FAM110B   | -5.69162   | -6.45019    | 1.14744   | 1.0511    | -0.0752099 | -0.214706 |
| FAM111A   | 5.27028    | 5.29743     | 5.79977   | 5.94984   | 5.33292    | 5.38605   |
| FAM111B   | 4.59612    | 4.70394     | 4.63426   | 4.70012   | 4.53075    | 4.94254   |
| FAM114A1  | 4.82741    | 4.6193      | 5.10186   | 5.60111   | 5.10621    | 5.13247   |
| FAM114A2  | 2.5055     | 2.77796     | 3.49067   | 3.78447   | 4.02794    | 4.47568   |
| FAM117A   | 1.12061    | 0.582527    | 1.81567   | 2.0766    | -0.664434  | -0.421131 |
| FAM117B   | 2.80674    | 2.82025     | 4.7196    | 4.91561   | 2.27928    | 1.89323   |
| FAM118A   | 2.69325    | 2.8991      | 2.74426   | 3.03838   | 2.68843    | 2.54122   |
| FAM118B   | 2.93918    | 2.92781     | 3.17564   | 3.54026   | 3.05175    | 3.39035   |
| FAM120A   | 5.84091    | 5.91734     | 6.31757   | 6.64049   | 6.76487    | 6.49102   |
| FAM120AOS | 3.27613    | 3.35088     | 3.11472   | 3.53923   | 3.91787    | 4.14973   |
| FAM120B   | 4.3804     | 4.32014     | 4.61981   | 4.63766   | 5.04749    | 5.0101    |
| FAM120C   | 4.43726    | 4.6411      | 3.06204   | 3.27488   | 2.30549    | 2.97629   |
| FAM122A   | 2.37508    | 2.29872     | 2.24276   | 2.44961   | 2.58049    | 2.14505   |
| FAM122B   | 3.71243    | 3.50294     | 4.42565   | 4.31112   | 4.38613    | 4.01096   |
| FAM122C   | 0.00148521 | -0.105152   | 1.25947   | 1.30907   | 0.961801   | 0.893261  |
| FAM126A   | 6.68758    | 6.53293     | 6.0768    | 6.34542   | 5.90476    | 6.07341   |
| FAM126B   | 4.4865     | 4.54821     | 4.22565   | 4.36974   | 4.97659    | 4.59935   |
| FAM127A   | 2.49569    | 1.93378     | 4.03323   | 4.18455   | 5.34459    | 5.39392   |
| FAM127B   | 1.17748    | 0.75605     | 2.13391   | 2.24997   | 3.4675     | 3.28214   |
| FAM127C   | -5.69162   | -5.43143    | 3.13615   | 3.2328    | 3.18383    | 3.07446   |
| FAM129A   | 6.70158    | 6.68738     | 4.74868   | 5.57505   | 7.2822     | 7.53107   |
| FAM129B   | 5.98888    | 5.84007     | 5.87712   | 6.22676   | 6.47608    | 6.71039   |
| FAM131A   | -1.61119   | -2.06994    | 2.72937   | 2.96799   | 4.14543    | 4.27056   |
| FAM132B   | 1.85554    | 1.03706     | 0.686917  | 0.605504  | 0.405873   | 0.68568   |
| FAM133A   | 1.37777    | 1.25145     | -1.72363  | -1.15432  | -2.41163   | -2.53597  |
| FAM133B   | 4.16861    | 4.19798     | 4.7899    | 4.75803   | 4.09381    | 4.17617   |
| FAM133CP  | 0.0463933  | 0.105383    | 1.01082   | 0.832793  | 0.24687    | -0.171404 |

|            |            |          |           |            |           |           |
|------------|------------|----------|-----------|------------|-----------|-----------|
| FAM133DP   | 2.49649    | 2.69913  | 3.08243   | 3.02407    | 2.51279   | 3.14023   |
| FAM134A    | 5.09545    | 5.53907  | 5.07748   | 5.73155    | 5.81193   | 6.39758   |
| FAM134B    | 3.35392    | 3.4044   | -0.510905 | -0.201784  | -0.876885 | -0.899103 |
| FAM134C    | 5.04867    | 5.31235  | 5.43072   | 5.85695    | 5.72607   | 5.9208    |
| FAM135A    | 4.76954    | 4.70116  | 2.70762   | 2.49851    | 4.29968   | 4.15592   |
| FAM136A    | 4.64577    | 4.7477   | 3.77199   | 4.25844    | 5.50941   | 5.86781   |
| FAM13A     | 3.9706     | 3.8976   | 4.58708   | 4.62518    | 3.56979   | 3.38031   |
| FAM13A-AS1 | 0.988179   | 0.659943 | 2.14773   | 2.08998    | 1.35054   | 0.865729  |
| FAM13B     | 4.34988    | 4.32906  | 4.7279    | 4.85636    | 4.94803   | 5.08044   |
| FAM13C     | -2.17488   | -2.6546  | -1.86109  | -2.52305   | 4.9892    | 4.76436   |
| FAM149B1   | 4.11136    | 4.17669  | 3.9466    | 4.18641    | 4.83596   | 5.06676   |
| FAM155A    | 1.18971    | 1.05291  | -4.18092  | -5.10387 ? | ?         |           |
| FAM156A    | 3.78838    | 3.81033  | 3.47787   | 3.46514    | 3.51048   | 2.82705   |
| FAM156B    | 3.1626     | 3.08508  | 2.95403   | 2.89634    | 2.51788   | 1.78829   |
| FAM160A1   | 2.71667    | 2.35346  | 0.699196  | 1.42259    | 3.21587   | 2.40704   |
| FAM160A2   | 3.53932    | 3.45005  | 3.15187   | 3.21985    | 2.90194   | 2.55539   |
| FAM160B1   | 4.48207    | 4.23931  | 4.22799   | 4.16962    | 4.83503   | 4.06147   |
| FAM160B2   | 3.15423    | 2.94443  | 3.62222   | 3.74603    | 3.03492   | 2.85935   |
| FAM161A    | 2.46835    | 2.48261  | 2.01617   | 1.95189    | 2.61815   | 2.34315   |
| FAM161B    | 1.57073    | 1.58893  | 0.803095  | 0.961179   | 1.26991   | 1.0163    |
| FAM162A    | 2.89339    | 3.13335  | 2.34787   | 2.72723    | 5.07651   | 4.88292   |
| FAM168A    | 5.54408    | 5.53326  | 5.27179   | 5.39645    | 6.08974   | 6.00709   |
| FAM168B    | 6.39434    | 6.38303  | 5.66235   | 5.91631    | 6.69159   | 6.45409   |
| FAM169A    | 3.13556    | 3.22339  | 2.41332   | 2.3989     | 3.41614   | 3.56344   |
| FAM171A1   | 4.30302    | 4.06853  | 3.51691   | 3.30692    | 3.43376   | 2.49787   |
| FAM171A2   | 0.915697   | 0.181128 | 1.63029   | 0.798133   | -1.37455  | -2.53597  |
| FAM171B    | 4.1651     | 4.24365  | 3.06915   | 3.29844    | 4.49197   | 5.1964    |
| FAM172A    | 3.67839    | 3.56506  | 3.56802   | 3.53142    | 3.97636   | 4.23873   |
| FAM173A    | 0.847877   | 0.537236 | 0.838911  | 0.724135   | 1.17263   | 1.68564   |
| FAM173B    | 3.50793    | 3.60996  | 3.76922   | 3.80107    | 3.62856   | 4.00581   |
| FAM174A    | 1.26097    | 1.2583   | 1.18285   | 1.24877    | 2.86522   | 2.54596   |
| FAM175A    | 2.79251    | 3.05672  | 2.73732   | 2.82207    | 2.45994   | 2.73675   |
| FAM175B    | 3.75933    | 3.877    | 3.97003   | 4.31007    | 4.31696   | 4.39788   |
| FAM177A1   | 3.28819    | 3.68436  | 2.80233   | 3.53142    | 3.86128   | 4.00925   |
| FAM179B    | 4.07643    | 4.15457  | 3.57137   | 3.60197    | 4.44184   | 4.61859   |
| FAM184A    | 2.85024    | 2.64307  | -2.5977   | -4.10635   | 2.95321   | 2.51148   |
| FAM185A    | 1.7247     | 1.77985  | 1.74944   | 1.78083    | 1.27424   | 1.42799   |
| FAM186B    | 0.643025   | 0.887744 | 0.725279  | 0.928511   | -0.199739 | -1.77     |
| FAM187A    | 0.579306   | 0.305083 | 1.37144   | 1.66978    | 2.56867   | 3.3277    |
| FAM188A    | 3.25657    | 3.30203  | 2.89863   | 3.07357    | 3.20387   | 3.78913   |
| FAM188B    | 2.42308    | 2.13328  | 0.817713  | 0.666666   | 1.9688    | 1.9121    |
| FAM189B    | 3.69216    | 3.59243  | 2.49597   | 2.74916    | 3.24508   | 3.42771   |
| FAM192A    | 4.32054    | 4.12075  | 5.00505   | 5.15119    | 5.48828   | 5.36581   |
| FAM193A    | 3.54409    | 3.3998   | 3.54269   | 3.44959    | 4.16464   | 3.56708   |
| FAM193B    | 3.07736    | 2.81793  | 4.25006   | 4.06734    | 3.40039   | 2.45821   |
| FAM195A    | 1.88966    | 1.71211  | 1.84993   | 2.04094    | 2.56129   | 3.19717   |
| FAM195B    | 3.32744    | 2.79691  | 2.05012   | 1.87419    | 4.72014   | 5.08607   |
| FAM196A    | 2.32885    | 2.282    | 2.60113   | 2.30058    | 1.17263   | 1.00759   |
| FAM196B    | 0.00148521 | 0.570657 | -1.2763   | 0.139221   | 2.37313   | 3.74861   |
| FAM198B    | 4.7146     | 4.78503  | -2.72315  | -3.10759   | 5.97145   | 5.89506   |
| FAM199X    | 5.44937    | 5.68692  | 5.64855   | 6.12148    | 6.03531   | 6.21288   |
| FAM19A2    | 3.3764     | 4.21486  | -0.935332 | -1.46458   | -2.01588  | -2.24661  |



|              |            |           |            |            |           |           |
|--------------|------------|-----------|------------|------------|-----------|-----------|
| FAM19A3      | 2.61834    | 3.04494   | -6.17309   | -4.52056 ? | ?         |           |
| FAM200A      | 2.58888    | 2.53327   | 2.41948    | 2.43225    | 2.64377   | 2.76094   |
| FAM200B      | 4.83667    | 4.75025   | 2.83608    | 3.02046    | 3.96357   | 3.87071   |
| FAM204A      | 4.25438    | 4.22837   | 4.45219    | 4.68713    | 4.77117   | 4.85362   |
| FAM206A      | 2.53455    | 2.60056   | 1.83331    | 2.21762    | 3.02794   | 3.4582    |
| FAM207A      | 0.636228   | 0.74123   | 0.571444   | 1.14437    | 1.33222   | 1.38254   |
| FAM207BP     | -0.107469  | 0.271724  | -0.377315  | 0.610908   | 0.716438  | 0.905197  |
| FAM208A      | 6.53624    | 6.69448   | 5.57082    | 5.72802    | 6.31173   | 6.29321   |
| FAM208B      | 7.00454    | 7.06443   | 5.62576    | 5.83746    | 6.92181   | 6.79927   |
| FAM20A       | 2.11151    | 1.54281   | 1.16526    | 1.14861    | 1.56373   | 1.1637    |
| FAM20B       | 6.61181    | 6.4333    | 5.4481     | 5.73939    | 6.20696   | 6.01523   |
| FAM20C       | 6.37584    | 5.9909    | 5.76702    | 6.25995    | 5.14906   | 5.26914   |
| FAM210A      | 3.2287     | 3.04297   | 3.01124    | 3.28134    | 4.37791   | 3.92082   |
| FAM210B      | 5.6612     | 5.28785   | 3.99514    | 4.03835    | 5.01696   | 4.64973   |
| FAM212B      | 2.6233     | 2.44571   | 1.95803    | 2.13236    | 3.88028   | 3.42515   |
| FAM213A      | 3.59554    | 3.51725   | 1.24279    | 0.120113   | -4.33548  | -3.70484  |
| FAM213B      | 2.31496    | 2.18823   | 2.65883    | 3.08839    | 2.45344   | 2.82857   |
| FAM214A      | 3.19165    | 3.02614   | 3.95724    | 3.72683    | 3.85632   | 3.66123   |
| FAM214B      | 2.62286    | 2.08021   | 3.20665    | 3.42256    | 4.6446    | 4.51003   |
| FAM215B      | 2.04575    | 1.96344   | 1.64306    | 1.50592    | 0.5192    | -0.348991 |
| FAM216A      | 2.96937    | 2.99334   | 1.94279    | 2.25171    | 2.44426   | 2.7689    |
| FAM217B      | 4.06097    | 4.26206   | 3.01706    | 3.27123    | 3.61293   | 3.95583   |
| FAM219A      | 3.29387    | 3.24452   | 3.8263     | 4.06235    | 5.82148   | 4.99458   |
| FAM219B      | 3.95657    | 4.07742   | 4.12356    | 4.33842    | 4.25949   | 4.29798   |
| FAM21A       | 4.77041    | 4.72889   | 4.35416    | 4.64377    | 4.73488   | 4.81479   |
| FAM21C       | 4.53158    | 4.63368   | 4.06998    | 4.40824    | 4.50213   | 4.61064   |
| FAM220A      | 3.0186     | 3.16104   | 3.14963    | 3.59507    | 3.18204   | 3.5293    |
| FAM221A      | -4.11163   | -4.87366  | -2.37543   | -2.78591   | 2.31699   | 1.44308   |
| FAM222A      | 1.27825    | 1.08411   | -1.72363   | -1.30113   | -0.105579 | -0.619042 |
| FAM222B      | 2.88589    | 2.43199   | 2.59785    | 2.50957    | 3.35372   | 2.34315   |
| FAM225A      | 3.08969    | 2.63584   | 2.18317    | 2.55871    | -1.38691  | -1.97994  |
| FAM225B      | 2.33014    | 2.31115   | 1.90884    | 2.26789    | 0.151443  | 0.354418  |
| FAM227A      | 1.04917    | 0.877069  | 2.16964    | 1.93559    | -0.777433 | -2.24661  |
| FAM227B      | 0.499762   | 0.508429  | 1.17739    | 0.825729   | 0.503685  | 0.327952  |
| FAM228B      | 0.62293    | 0.346146  | 0.569122   | 0.248656   | 1.14002   | 0.37759   |
| FAM229A      | 1.70957    | 1.66014   | 1.67982    | 1.60937    | 1.93748   | 0.76427   |
| FAM229B      | 0.784805   | 0.97184   | 1.47473    | 1.66599    | 2.54427   | 3.69203   |
| FAM26E       | -4.69535   | -2.87684  | 2.88795    | 3.27704    | 1.34536   | 1.4532    |
| FAM27C       | 1.03912    | 0.94694   | -0.715936  | -0.221497  | 0.46335   | 0.618765  |
| FAM27E3      | 1.58173    | 1.68185   | 0.445928   | 0.588603   | 0.898146  | 0.832509  |
| FAM32A       | 4.92752    | 4.86918   | 4.33807    | 4.74058    | 6.16237   | 6.42805   |
| FAM35A       | 4.72757    | 4.62699   | 4.29424    | 4.54233    | 5.44262   | 6.14934   |
| FAM3A        | 2.98392    | 2.70458   | 2.91451    | 2.84828    | 3.29098   | 3.25329   |
| FAM3C        | 5.86329    | 5.89644   | 3.96151    | 4.35292    | 6.51801   | 6.25248   |
| FAM3C2       | 4.79751    | 4.83389   | 2.88715    | 3.33563    | 5.45989   | 5.50527   |
| FAM43B       | -0.0407343 | -0.629746 | 0.759062   | 0.773887 ? | ?         |           |
| FAM45A       | 3.0549     | 2.88848   | 3.30209    | 3.67065    | 3.32557   | 3.73351   |
| FAM45B       | 2.82752    | 2.68901   | 3.05275    | 3.42673    | 3.20384   | 3.31653   |
| FAM46A       | 5.31669    | 5.14307   | 3.97507    | 4.73899    | 5.66359   | 5.6952    |
| FAM46B       | 1.94119    | 1.81331   | -0.0541032 | 0.736735   | -2.33767  | -3.12051  |
| FAM46C       | 1.14018    | 1.61934   | 1.02599    | 2.07607    | 0.147163  | 1.03481   |
| FAM47E-STBD1 | 2.00098    | 1.90775   | 2.38944    | 2.94894    | 2.92999   | 2.70692   |

|           |           |           |           |           |            |           |
|-----------|-----------|-----------|-----------|-----------|------------|-----------|
| FAM49A    | -3.2383   | -2.6546   | 2.33219   | 1.86274   | -5.07051   | -3.70484  |
| FAM49B    | 5.1206    | 5.2873    | 4.79951   | 5.12418   | 5.50145    | 5.78913   |
| FAM50A    | 3.95825   | 3.81444   | 3.89462   | 4.23102   | 4.88272    | 4.74139   |
| FAM53B    | 3.48144   | 3.25744   | 3.81638   | 3.90985   | 4.3095     | 4.08177   |
| FAM53C    | 5.28139   | 5.04192   | 4.95665   | 5.26347   | 5.09457    | 5.0058    |
| FAM57A    | 3.74074   | 3.67414   | 3.30833   | 3.52598   | 4.83453    | 4.47568   |
| FAM58A    | 2.00485   | 1.97181   | 2.25062   | 2.69179   | 2.55644    | 3.1599    |
| FAM60A    | 5.19859   | 5.50812   | 4.02988   | 4.42552   | 4.68865    | 5.08791   |
| FAM60CP   | 2.05118   | 2.39728   | 0.545662  | 1.21205   | 1.43832    | 1.85237   |
| FAM63A    | 2.56537   | 2.63256   | 3.95857   | 4.60455   | 3.61697    | 3.28197   |
| FAM63B    | 4.38373   | 4.55325   | 3.96623   | 4.44862   | 4.41314    | 4.16365   |
| FAM64A    | 3.83812   | 3.74039   | 3.98616   | 4.51731   | 4.30026    | 4.80074   |
| FAM65A    | 2.51264   | 2.12555   | 3.54092   | 3.44479   | 3.2704     | 3.23287   |
| FAM65B    | -3.8896   | -5.45651  | -2.48229  | -1.58485  | 3.5947     | 3.29551   |
| FAM65C    | 0.0425183 | 0.137189  | 5.80303   | 5.94747   | 0.766027   | -0.348991 |
| FAM69A    | 3.22207   | 3.03525   | 4.55764   | 4.60421   | 5.14701    | 5.39609   |
| FAM72A    | 2.50818   | 2.67314   | 2.26837   | 2.62343   | 2.64789    | 2.7925    |
| FAM72B    | 2.93141   | 2.74175   | 2.15136   | 2.11064   | 3.78391    | 3.69257   |
| FAM72C    | 2.3658    | 2.23864   | 1.59938   | 1.64278   | 2.19176    | 1.34637   |
| FAM72D    | 2.43086   | 2.64661   | 1.45878   | 2.0837    | 2.06374    | 2.26032   |
| FAM73A    | 4.61436   | 5.01339   | 4.54863   | 5.19551   | 5.07269    | 5.48557   |
| FAM73B    | 3.17897   | 2.80862   | 3.09027   | 3.26404   | 3.06761    | 3.12301   |
| FAM76A    | 1.85554   | 1.97488   | 1.98141   | 2.28553   | 2.2254     | 2.22994   |
| FAM76B    | 2.79878   | 2.91654   | 3.48182   | 3.50772   | 3.15508    | 2.61523   |
| FAM78B    | 4.67759   | 4.55048   | -3.18222  | -3.78492  | -4.33548 ? |           |
| FAM81A    | 1.6541    | 1.79457   | -1.13882  | -1.30113  | 1.94705    | 2.01441   |
| FAM83D    | 5.39627   | 5.42967   | 5.05306   | 5.58856   | 5.25254    | 5.073     |
| FAM83G    | 3.45067   | 3.53284   | 1.18978   | 1.48311   | 4.39427    | 4.24453   |
| FAM84A    | -4.11163  | -6.45019  | -0.252626 | -0.226029 | 1.61119    | 1.86317   |
| FAM84B    | 5.24071   | 5.87424   | 1.3479    | 2.14386   | 3.70545    | 4.56474   |
| FAM86B3P  | 0.614795  | 0.714127  | 1.40266   | 1.43781   | 0.0061041  | -0.364177 |
| FAM86C1   | 1.97184   | 1.80538   | 1.65423   | 2.18376   | 1.01761    | 1.13117   |
| FAM86C2P  | -0.337702 | -0.838711 | 1.32602   | 1.22879   | -0.617514  | 0.0484734 |
| FAM86DP   | 4.66551   | 4.64508   | 2.59285   | 3.08479   | 2.02989    | 2.14682   |
| FAM89A    | 3.14328   | 3.17378   | 2.91977   | 3.12958   | 2.35094    | 2.77711   |
| FAM89B    | 3.11498   | 2.95174   | 2.38103   | 2.50286   | 2.56085    | 2.87527   |
| FAM8A1    | 4.19042   | 4.09554   | 3.90526   | 3.92731   | 5.12715    | 5.15204   |
| FAM91A1   | 5.556     | 5.55375   | 5.38434   | 5.82952   | 6.48218    | 6.3516    |
| FAM91A3P  | 2.13125   | 2.02411   | 1.71224   | 2.26166   | 2.85424    | 3.1607    |
| FAM92A1   | 3.73065   | 3.61526   | 4.29004   | 4.23518   | 3.85335    | 3.57323   |
| FAM92A1P1 | 1.06879   | 0.626084  | 1.63559   | 1.64131   | 1.59977    | 1.59788   |
| FAM95B1   | 1.12667   | 0.964147  | -2.30381  | -2.40763  | 1.47616    | 0.670396  |
| FAM96A    | 4.46202   | 4.43801   | 3.71884   | 4.03455   | 4.46445    | 5.35127   |
| FAM96B    | 3.40421   | 3.44705   | 3.44583   | 4.03965   | 4.825      | 5.28905   |
| FAM98A    | 4.96179   | 5.00169   | 3.9889    | 4.57855   | 5.37415    | 5.48311   |
| FAM98B    | 4.09452   | 4.037     | 3.12709   | 3.19496   | 3.01917    | 3.2358    |
| FAM98C    | 1.50553   | 1.52587   | 1.00636   | 1.4458    | 1.77017    | 2.0482    |
| FAN1      | 4.81135   | 4.69411   | 4.42902   | 4.4676    | 3.91296    | 3.93706   |
| FANCA     | 5.09673   | 4.99284   | 4.54352   | 4.57088   | 3.79848    | 3.17753   |
| FANCB     | 3.46583   | 3.5609    | 3.10419   | 3.24873   | 2.99791    | 3.36206   |
| FANCC     | 3.25047   | 3.18886   | 3.57978   | 3.51402   | 3.46798    | 3.20293   |
| FANCD2    | 5.62761   | 5.67908   | 5.01021   | 5.13163   | 5.15862    | 5.01218   |

|            |          |           |            |           |          |          |
|------------|----------|-----------|------------|-----------|----------|----------|
| FANCE      | 2.32053  | 2.47968   | 1.78805    | 2.41082   | 3.08621  | 3.13878  |
| FANCF      | 2.73138  | 2.82487   | 2.56468    | 2.65937   | 2.0086   | 2.10066  |
| FANCG      | 4.01687  | 4.00169   | 3.46214    | 3.79656   | 4.21158  | 4.40703  |
| FANCI      | 6.61634  | 6.74533   | 6.16736    | 6.35976   | 5.88125  | 5.83307  |
| FANCL      | 4.02781  | 4.02379   | 3.83725    | 3.78683   | 3.77848  | 3.9429   |
| FANCM      | 4.3412   | 4.44328   | 3.72186    | 3.88835   | 4.05479  | 4.0958   |
| FAP        | 3.26847  | 2.5487    | 0.272059   | 0.348153  | -3.5256  | -3.70484 |
| FAR1       | 5.03688  | 5.09074   | 5.36335    | 5.39897   | 5.04052  | 4.92808  |
| FAR2       | 3.11983  | 3.29037   | 1.65571    | 1.63902   | 2.11628  | 2.92566  |
| FARP1      | 5.581    | 5.40999   | 5.69454    | 5.3512    | 3.35879  | 2.53745  |
| FARP2      | 5.71162  | 5.71286   | 4.79854    | 4.99937   | 4.97849  | 4.83274  |
| FARS2      | 2.5055   | 2.41981   | 2.21738    | 2.49852   | 2.84946  | 3.20318  |
| FARSA      | 5.1999   | 5.13286   | 3.66979    | 4.16729   | 5.88997  | 5.89643  |
| FARSB      | 4.61549  | 4.63847   | 4.62945    | 5.10123   | 4.96036  | 5.23945  |
| FAS        | 3.60708  | 3.48456   | 2.66628    | 2.8656    | 2.42717  | 2.52212  |
| FASN       | 7.03349  | 6.76143   | 5.91352    | 5.89398   | 6.96011  | 7.66341  |
| FASTK      | 4.17973  | 3.96027   | 4.51257    | 4.85622   | 4.72824  | 4.98938  |
| FASTKD1    | 3.57472  | 3.435     | 3.22587    | 3.44385   | 3.9284   | 4.71611  |
| FASTKD2    | 4.90499  | 5.05875   | 4.01124    | 4.37498   | 4.9763   | 5.61463  |
| FASTKD3    | 3.32328  | 3.32179   | 2.93801    | 3.10549   | 3.21006  | 3.581    |
| FASTKD5    | 4.54104  | 4.38107   | 3.92859    | 4.22321   | 4.037    | 4.12257  |
| FAT1       | 9.40009  | 9.31844   | 8.41311    | 8.24657   | 8.49709  | 8.16979  |
| FAT3       | -2.79121 | -3.29152  | -1.37581   | -1.78641  | 4.93724  | 5.04734  |
| FAT4       | 2.3535   | 2.40445   | 5.45807    | 5.08779   | 5.37483  | 5.61463  |
| FAU        | 6.23062  | 6.1754    | 5.18199    | 5.74947   | 5.57821  | 6.406    |
| FAUP1      | 4.44904  | 4.47543   | 3.48952    | 3.90339   | 3.90229  | 4.38486  |
| FAXC       | 0.399051 | 0.432061  | -0.0748604 | 0.549472  | 4.36896  | 4.42899  |
| FAXDC2     | 2.59785  | 2.42895   | 3.23644    | 2.96264   | 2.3397   | 1.75275  |
| FBF1       | 2.80011  | 2.5525    | 2.92857    | 2.89473   | 1.9215   | 1.84977  |
| FBL        | 4.65296  | 4.42208   | 4.43118    | 4.72167   | 5.30691  | 5.08688  |
| FBLIM1     | -3.2383  | -3.46127  | 3.23222    | 3.39101   | 4.55098  | 4.92537  |
| FBLN1      | -6.68418 | -6.45019  | 1.662      | 1.41477   | 2.77849  | 2.70692  |
| FBLN7      | 1.9484   | 1.59247   | 2.11571    | 1.71775   | -1.80184 | -2.38405 |
| FBN1       | 6.90718  | 7.0695    | 6.67402    | 6.80999   | 6.49337  | 6.60245  |
| FBN2       | 5.20176  | 5.06509   | 4.72786    | 4.53141   | 4.10124  | 3.9299   |
| FBRS       | 3.1179   | 2.85909   | 3.57636    | 3.58465   | 3.02444  | 2.71956  |
| FBRSL1     | 1.15272  | 0.877069  | 1.5714     | 1.30061   | 1.22848  | 0.597145 |
| FBXL12     | 2.06249  | 1.72206   | 2.53417    | 2.47615   | 3.24958  | 2.49297  |
| FBXL14     | 1.36166  | 1.12967   | 1.78805    | 2.15329   | 1.70166  | 1.92267  |
| FBXL15     | 0.311956 | -0.130408 | -0.0336419 | 0.185093  | 0.166458 | 0.265557 |
| FBXL16     | 0.121214 | -0.418273 | 1.95605    | 1.99972   | -3.6585  | -4.11926 |
| FBXL17     | 2.92846  | 2.85684   | 2.83608    | 2.84828   | 3.23148  | 3.59249  |
| FBXL18     | 2.23168  | 2.02903   | 2.30031    | 2.4911    | 2.50962  | 1.97981  |
| FBXL19     | 3.30794  | 3.1681    | 3.05237    | 3.26186   | 3.18204  | 2.97277  |
| FBXL19-AS1 | 1.10187  | 0.90354   | 1.01621    | 1.02051   | 0.947083 | -0.38461 |
| FBXL2      | 2.94298  | 2.84094   | 2.68993    | 2.72723   | 3.64575  | 3.48558  |
| FBXL20     | 4.39434  | 4.26592   | 4.30331    | 4.25092   | 4.69668  | 4.40571  |
| FBXL3      | 4.27403  | 4.50707   | 4.30552    | 4.60692   | 4.56238  | 4.87755  |
| FBXL4      | 3.40552  | 3.48259   | 3.55456    | 3.5636    | 4.40444  | 4.39919  |
| FBXL5      | 5.28603  | 5.26378   | 4.81365    | 5.10062   | 5.58585  | 5.98021  |
| FBXL6      | 2.02244  | 1.89209   | 2.03788    | 2.33701   | 2.39882  | 2.09021  |
| FBXL7      | 1.399    | 1.31199   | 2.16964    | 2.20408 ? |          | ?        |

|          |           |           |           |             |           |           |
|----------|-----------|-----------|-----------|-------------|-----------|-----------|
| FBXL8    | -0.730562 | -0.655276 | 0.975755  | 0.769433    | 0.427241  | 0.0163822 |
| FBXO10   | 2.2299    | 2.11361   | 2.28681   | 2.38847     | 3.89302   | 3.62077   |
| FBXO11   | 4.84789   | 4.7412    | 4.49816   | 4.37617     | 4.62366   | 4.75806   |
| FBXO16   | 0.374043  | 0.310445  | 0.518384  | 0.677359    | -0.309408 | 0.151002  |
| FBXO17   | 2.02544   | 2.18103   | 3.54778   | 3.70495     | 2.83155   | 2.61867   |
| FBXO18   | 4.6847    | 4.54726   | 4.49047   | 4.62315     | 5.13637   | 5.08029   |
| FBXO21   | 4.79578   | 4.80041   | 4.15632   | 4.55651     | 4.61637   | 4.6813    |
| FBXO22   | 6.23976   | 6.41089   | 4.59587   | 4.78801     | 4.73882   | 4.77769   |
| FBXO25   | 2.94373   | 2.94679   | 2.27592   | 2.89537     | 3.88651   | 4.10667   |
| FBXO27   | -2.17488  | -1.7075   | 1.68687   | 2.34114     | -1.90489  | -1.81523  |
| FBXO28   | 4.93117   | 5.02247   | 4.48447   | 4.74603     | 5.32943   | 5.46446   |
| FBXO3    | 4.1828    | 4.21575   | 4.20341   | 4.35469     | 4.54181   | 4.61746   |
| FBXO30   | 4.01773   | 4.06853   | 5.37911   | 5.37397     | 5.55913   | 5.43281   |
| FBXO31   | 3.8555    | 3.73068   | 3.83883   | 4.00231     | 3.23731   | 3.06148   |
| FBXO32   | 3.75727   | 3.66127   | 4.13275   | 5.04345     | 8.04693   | 7.85906   |
| FBXO33   | 3.49321   | 3.58154   | 2.81366   | 3.20859     | 3.58762   | 4.1881    |
| FBXO34   | 4.55358   | 4.57813   | 3.26562   | 3.69208     | 3.98263   | 3.99199   |
| FBXO36   | 0.604783  | 0.292146  | 1.94578   | 2.18581     | 0.886652  | 0.702755  |
| FBXO38   | 4.51645   | 4.53503   | 5.23906   | 5.50863     | 5.25107   | 5.46508   |
| FBXO4    | 1.53936   | 1.43806   | 0.759062  | 1.08105     | 1.5443    | 2.21217   |
| FBXO41   | 3.39103   | 3.05286   | 3.43853   | 3.20406     | 1.52955   | 0.878317  |
| FBXO42   | 3.63965   | 3.50581   | 3.99514   | 4.09206     | 4.57091   | 4.22697   |
| FBXO44   | 1.66727   | 1.59788   | 3.12464   | 3.44146     | 1.95392   | 1.89323   |
| FBXO45   | 4.25583   | 4.26846   | 4.40893   | 4.56007     | 5.82673   | 5.71639   |
| FBXO46   | 1.96272   | 1.78622   | 2.0486    | 1.75539     | 2.67736   | 2.09257   |
| FBXO48   | 1.16516   | 1.24456   | 1.30837   | 1.55655     | 0.134221  | -0.799586 |
| FBXO5    | 4.09127   | 4.1051    | 3.9393    | 4.15444     | 4.49828   | 4.6607    |
| FBXO7    | 6.45875   | 6.37614   | 5.54098   | 5.89574     | 5.13411   | 5.21808   |
| FBXO8    | 2.15579   | 2.14443   | 2.09271   | 2.49646     | 2.47596   | 3.28643   |
| FBXO9    | 4.02287   | 3.79807   | 3.87582   | 4.10791     | 4.87155   | 4.55302   |
| FBXW11   | 5.10099   | 5.33763   | 5.43025   | 6.03611     | 6.01895   | 6.18128   |
| FBXW11P1 | -0.611409 | -0.292758 | 0.102     | 0.687195    | 0.459264  | 0.151378  |
| FBXW2    | 5.54765   | 5.6437    | 5.12935   | 5.41179     | 6.05929   | 5.92628   |
| FBXW4    | 1.37928   | 1.26379   | 1.95093   | 2.24354     | 1.82245   | 1.90744   |
| FBXW5    | 3.69431   | 3.19715   | 3.32823   | 3.46483     | 3.5769    | 3.56241   |
| FBXW7    | 4.00445   | 3.97679   | 4.36508   | 4.40048     | 4.4136    | 4.31121   |
| FBXW8    | 3.44324   | 3.35678   | 2.70294   | 3.05206     | 2.48728   | 2.28446   |
| FBXW9    | 1.2317    | 0.756391  | 0.966283  | 0.749225    | 2.35093   | 2.61071   |
| FCF1     | 4.13595   | 3.99125   | 3.27158   | 3.64773     | 4.55634   | 4.45528   |
| FCGR2A   | 1.98713   | 1.77171   | 1.49588   | 1.42763     | -1.53062  | -1.18284  |
| FCGRT    | 1.05586   | 0.432061  | 3.97761   | 3.93556     | -0.43131  | -1.006    |
| FCHO2    | 3.19725   | 3.29038   | 3.88256   | 3.90937     | 3.37174   | 3.25329   |
| FCHSD1   | 3.17766   | 3.11623   | 3.58706   | 3.86278     | 3.79144   | 3.86618   |
| FCHSD2   | 3.91003   | 4.01636   | 3.2576    | 3.45051     | 2.2197    | 2.36546   |
| FCRLA    | 5.25691   | 4.20957   | -6.17309  | -3.52222 ?  |           | -5.69922  |
| FDCSP    | 8.50689   | 7.79136   | -3.18222  | -2.93781    | -3.48878  | -3.38329  |
| FDFT1    | 6.23774   | 6.15554   | 5.83753   | 6.36614     | 5.88633   | 6.3946    |
| FDPS     | 6.64927   | 6.56561   | 5.65019   | 6.0712      | 6.01821   | 6.39273   |
| FDPSP1   | 1.40085   | 1.82799   | 0.929185  | 1.56764     | 0.952572  | 1.26395   |
| FDPSP7   | 0.111005  | 0.13184   | -0.349265 | 0.000201963 | 0.130351  | 0.267032  |
| FDX1     | 1.23489   | 1.19305   | 2.73688   | 3.15984     | 2.8206    | 3.23324   |
| FDX1L    | 1.78747   | 1.65646   | 1.38465   | 1.59317     | 2.65224   | 2.92352   |

|          |           |           |           |           |           |            |
|----------|-----------|-----------|-----------|-----------|-----------|------------|
| FDXACB1  | 0.09815   | 0.497117  | 1.17363   | 1.68141   | 0.156927  | 1.07138    |
| FDXR     | 1.51041   | 1.40138   | 1.20023   | 1.31748   | 1.67957   | 2.00067    |
| FECH     | 3.70073   | 3.68563   | 4.16409   | 4.15209   | 3.34673   | 3.53169    |
| FEM1A    | 1.66551   | 1.32714   | 0.637323  | 0.60666   | 1.81173   | 0.719262   |
| FEM1B    | 5.4289    | 5.62426   | 5.33512   | 5.59421   | 5.83828   | 6.13444    |
| FEM1C    | 4.62002   | 4.39357   | 4.48092   | 4.76768   | 4.73789   | 4.50639    |
| FEN1     | 6.4699    | 6.6478    | 5.43163   | 5.97331   | 6.06356   | 6.13954    |
| FENDRR   | -4.37417  | -2.6546   | 6.35491   | 6.48082   | -6.64581  | -3.70484   |
| FER      | 5.48205   | 5.54032   | 5.16242   | 5.2624    | 5.15346   | 5.41027    |
| FER1L4   | -0.744656 | -1.0363   | 3.63825   | 3.18119   | 0.373208  | -1.89883   |
| FERMT1   | 3.09209   | 3.46048   | -1.05395  | -0.380732 | 2.3026    | 2.47817    |
| FERMT2   | 5.17282   | 5.21622   | 3.94833   | 4.23879   | 5.60912   | 5.66668    |
| FERP1    | 0.0753683 | 0.356865  | 0.387704  | 1.0701    | 0.600755  | 0.82158    |
| FEZ1     | 3.40421   | 3.55117   | -2.18288  | -1.15432  | 3.22995   | 3.68774    |
| FEZ2     | 4.58689   | 4.82486   | 4.52986   | 4.90728   | 5.86226   | 6.45818    |
| FGD1     | 2.28393   | 2.10323   | 2.25529   | 2.15798   | 1.43249   | 1.46325    |
| FGD4     | 4.01945   | 3.94442   | -0.138983 | -0.353769 | 0.740643  | 0.847941   |
| FGD5-AS1 | 6.16005   | 6.26333   | 5.3744    | 5.73705   | 5.55431   | 5.8271     |
| FGD6     | 1.98042   | 2.08792   | 3.9573    | 3.91214   | 2.07103   | 1.95865    |
| FGF1     | -1.74441  | -1.93875  | 1.14744   | 1.97866   | 0.293994  | 0.769095   |
| FGF12    | 2.73138   | 2.88146   | -3.59683  | -3.78492  | 3.554     | 3.71954    |
| FGF13    | 3.12857   | 2.86359   | -0.401986 | 0.231137  | 2.86717   | 3.52691    |
| FGF14    | -2.97375  | -2.43591  | 2.03133   | 2.74873   | 0.269464  | -0.0383811 |
| FGF2     | 5.24896   | 5.52657   | 5.10372   | 5.85135   | 6.10616   | 6.13858    |
| FGF5     | -0.289526 | 0.707154  | -4.18092  | -2.20128  | 1.17894   | 1.69389    |
| FGFR1    | 2.68463   | 3.039     | 4.43422   | 4.77373   | 3.30547   | 3.47071    |
| FGFR1OP  | 3.79608   | 4.04839   | 3.93496   | 4.11937   | 4.29593   | 3.98133    |
| FGFR1OP2 | 4.39678   | 4.51371   | 4.54948   | 4.6676    | 4.15746   | 4.37143    |
| FGFR3    | -0.306596 | -0.93902  | -0.206089 | -0.899119 | 2.04015   | 1.56011    |
| FGFR4    | 2.56772   | 1.78985   | -1.37581  | -1.10853  | -0.510371 | -1.006     |
| FGFRL1   | 5.70841   | 5.17735   | 3.7113    | 3.79657   | 6.68591   | 6.18275    |
| FGG      | -3.8896   | -5.45651  | 4.03322   | 2.61228 ? |           | -4.70296   |
| FGGY     | 0.727258  | 0.603321  | 1.60441   | 1.83957   | 1.47416   | 1.80111    |
| FH       | 5.15712   | 5.08539   | 5.04147   | 5.41116   | 5.58236   | 5.89775    |
| FHDC1    | 4.14876   | 3.42285   | 1.68069   | 2.3588    | 2.44299   | 2.66398    |
| FHL1     | 1.49572   | 1.49719   | 5.23801   | 5.55649   | 4.83104   | 5.14502    |
| FHL2     | 4.10424   | 4.12117   | 4.3361    | 4.92253   | 4.21696   | 4.72687    |
| FHL3     | 1.87459   | 1.64047   | 1.02599   | 1.01017   | 2.49705   | 2.07467    |
| FHOD1    | 3.75404   | 3.81013   | 4.14749   | 4.31396   | 4.52027   | 4.59802    |
| FHOD3    | 2.61976   | 2.68771   | 0.217851  | 0.372451  | 3.04238   | 2.75202    |
| FHP1     | 0.275341  | 0.484035  | 0.220986  | 0.697213  | 1.01895   | 0.556964   |
| FIBCD1   | ?         | ?         | -1.53926  | -1.25052  | 1.20393   | 2.01441    |
| FIBP     | 4.48765   | 4.56919   | 3.79662   | 4.34547   | 3.77744   | 4.42642    |
| FICD     | 2.89711   | 2.80395   | 2.84439   | 3.15562   | 3.09458   | 2.98329    |
| FIG4     | 1.76038   | 1.74176   | 0.308431  | 0.857026  | 3.51211   | 3.8876     |
| FIGN     | 4.09126   | 4.14263   | 3.39391   | 3.32163   | 6.16225   | 5.72268    |
| FIGNL1   | 5.36126   | 5.55048   | 4.54013   | 4.77762   | 4.80064   | 4.77206    |
| FILIP1   | -0.632781 | -0.158917 | 0.793829  | 0.570414  | 0.878914  | 0.878309   |
| FILIP1L  | 3.47709   | 3.35414   | 4.4942    | 4.43421   | 5.99522   | 5.78863    |
| FIP1L1   | 4.50597   | 4.56793   | 4.45973   | 4.60707   | 4.78516   | 4.57767    |
| FIRRE    | 0.699116  | 0.980157  | 1.83852   | 1.96706   | 1.56281   | 1.794      |
| FIS1     | 4.31981   | 4.18731   | 3.56467   | 3.94645   | 4.49766   | 5.60047    |

|            |            |          |           |           |           |           |
|------------|------------|----------|-----------|-----------|-----------|-----------|
| FITM2      | 3.90362    | 4.30698  | 3.81788   | 4.53412   | 2.8215    | 3.40964   |
| FIZ1       | 1.55834    | 1.55956  | 1.69915   | 1.22214   | 1.93698   | 1.60621   |
| FJX1       | 3.62622    | 3.59515  | 2.60765   | 2.87987   | 3.6537    | 3.40181   |
| FKBP10     | 6.32847    | 6.07168  | 6.55054   | 6.70313   | 3.48944   | 3.38869   |
| FKBP11     | 4.05079    | 3.96342  | 3.57802   | 3.57767   | 3.04878   | 2.79314   |
| FKBP14     | 4.88635    | 5.02146  | 5.45219   | 5.75843   | 4.93168   | 4.99458   |
| FKBP15     | 4.52924    | 4.53292  | 4.68243   | 5.02506   | 4.65261   | 4.45691   |
| FKBP1A     | 5.94377    | 5.91955  | 6.33239   | 6.60753   | 5.46066   | 5.5213    |
| FKBP1C     | 3.18653    | 3.00592  | 3.51978   | 3.96919   | 3.00935   | 3.17689   |
| FKBP2      | 4.25947    | 4.12585  | 3.60438   | 3.62588   | 3.5745    | 3.34041   |
| FKBP3      | 4.29737    | 4.4168   | 3.55909   | 3.82331   | 4.34174   | 4.76114   |
| FKBP4      | 5.75895    | 5.78427  | 5.5876    | 6.0772    | 5.72801   | 5.79045   |
| FKBP5      | 2.63184    | 2.77318  | 3.29423   | 3.58292   | 3.01389   | 2.76903   |
| FKBP7      | 1.99094    | 1.84552  | 4.69145   | 5.01981   | 1.66165   | 2.34315   |
| FKBP8      | 4.33287    | 3.9965   | 4.10187   | 4.35054   | 5.24279   | 5.7169    |
| FKBP9      | 6.13654    | 6.07996  | 6.63254   | 6.86904   | 4.96856   | 4.55875   |
| FKBP9P1    | -0.0255089 | 0.165687 | 1.0314    | 1.13528   | 0.887018  | -1.05512  |
| FKBPL      | 2.01862    | 2.02903  | 1.53761   | 2.07607   | 1.9359    | 2.53647   |
| FKRP       | 2.8186     | 2.45901  | 2.93282   | 3.03073   | 3.27486   | 3.19114   |
| FKTN       | 4.27388    | 4.33967  | 4.48712   | 4.80704   | 4.92653   | 5.19188   |
| FLAD1      | 4.2995     | 4.32913  | 3.61252   | 4.02431   | 4.28147   | 4.59363   |
| FLCN       | 3.20471    | 3.15737  | 4.26871   | 4.38702   | 4.45986   | 4.10385   |
| FLG        | 0.0152977  | 1.46106  | 0.0417196 | 0.387098  | 3.45702   | 2.81789   |
| FLI1       | -3.8896    | -4.87366 | 4.2208    | 4.6818    | 1.48439   | 1.63317   |
| FLI2       | 4.95823    | 4.88033  | 5.59495   | 6.05324   | 6.14623   | 6.15087   |
| FLJ22447   | -2.22312   | -3.46128 | -0.935379 | -0.504403 | 1.79061   | 1.51601   |
| FLJ37453   | 0.9009     | 0.912259 | 0.558032  | 0.445854  | 0.384182  | 0.422664  |
| FLJ42393   | 1.6585     | 1.47383  | 1.5847    | 1.14862   | 1.56854   | 0.522196  |
| FLNA       | 9.02475    | 9.17677  | 9.78101   | 10.11     | 9.62971   | 9.79818   |
| FLNB       | 7.43202    | 7.34553  | 7.72843   | 7.95328   | 9.28395   | 8.52222   |
| FLNB-AS1   | 1.53098    | 1.35368  | 1.86375   | 2.09678   | 3.31667   | 2.00468   |
| FLNC       | -6.68418   | -4.13839 | 5.49816   | 5.55604   | -2.98535  | -2.12114  |
| FLOT1      | 3.98741    | 3.75511  | 5.93607   | 6.35211   | 6.39275   | 6.47937   |
| FLOT2      | 4.06329    | 3.90347  | 3.99389   | 4.31533   | 5.25183   | 5.13483   |
| FLRT1      | 0.855878   | 0.45058  | 0.428389  | 0.5635    | -0.878443 | -1.67189  |
| FLRT2      | -4.69535   | -4.13839 | 5.45173   | 4.68477   | 3.16783   | 3.44811   |
| FLRT3      | 5.13932    | 5.23888  | 1.35568   | 0.845438  | 3.6762    | 4.08769   |
| FLT1       | 7.23652    | 7.12492  | 2.00633   | 2.3424    | -2.41163  | -3.12051  |
| FLT3LG     | -0.166036  | -0.68484 | 0.786178  | 0.823122  | -0.811234 | -0.623932 |
| FLVCR1     | 4.47397    | 4.51586  | 3.51518   | 3.85407   | 4.09624   | 3.71745   |
| FLVCR1-AS1 | 0.50068    | 0.357428 | -0.095919 | 0.248838  | 1.5443    | 1.87074   |
| FLYWCH1    | 2.56772    | 2.49427  | 3.57862   | 3.70815   | 2.77224   | 3.15127   |
| FLYWCH2    | 1.75628    | 1.21668  | 2.42751   | 2.49851   | 1.53448   | 2.15749   |
| FMN1       | 4.14562    | 3.89801  | 4.57718   | 4.74681   | 1.24061   | 1.06153   |
| FMN2       | 2.54638    | 2.33767  | -1.09576  | -1.20162  | 3.51614   | 3.25907   |
| FMNL1      | -2.05464   | -2.46206 | 2.0217    | 2.53724   | 1.3899    | 1.14712   |
| FMNL2      | 6.13424    | 6.10795  | 5.09608   | 5.03453   | 6.67237   | 6.2207    |
| FMNL3      | 5.94371    | 6.14144  | 4.73461   | 4.83293   | 3.31742   | 3.20019   |
| FMO5       | 0.312247   | 0.537236 | 0.610974  | 0.266325  | 0.549226  | 0.247587  |
| FMR1       | 4.69859    | 4.65089  | 4.88188   | 4.91076   | 5.43243   | 5.16133   |
| FN1        | 9.82102    | 9.33346  | 10.1305   | 10.1156   | 8.28505   | 7.63575   |
| FN3KRP     | 3.85797    | 3.75331  | 3.27682   | 3.57872   | 4.56823   | 4.34857   |

|            |            |           |           |            |            |           |
|------------|------------|-----------|-----------|------------|------------|-----------|
| FNBP1      | 3.28818    | 3.06854   | 3.47468   | 3.393      | 3.58048    | 3.18811   |
| FNBP1L     | 5.468      | 5.66191   | 4.5613    | 4.73744    | 4.82903    | 4.65741   |
| FNBP4      | 5.52159    | 5.43537   | 5.67716   | 5.70455    | 5.99656    | 5.27342   |
| FNDC3A     | 5.93478    | 5.87867   | 5.09318   | 5.26946    | 6.4758     | 6.26482   |
| FNDC3B     | 6.79309    | 6.52968   | 6.88526   | 7.06937    | 6.74861    | 6.16556   |
| FNDC4      | 1.02208    | 0.912259  | -0.757028 | -0.464785  | 1.93217    | 2.71536   |
| FNIP1      | 5.5186     | 5.23599   | 5.51792   | 5.66208    | 5.66725    | 5.59426   |
| FNIP2      | 3.95555    | 4.03001   | 3.65883   | 3.74759    | 4.1773     | 3.7991    |
| FNTA       | 5.00895    | 5.03017   | 4.24806   | 4.48058    | 4.65261    | 5.2456    |
| FNTAL1     | -0.0348312 | 0.415683  | -1.05756  | -0.103155  | -0.0614522 | 0.661075  |
| FNTB       | 3.92489    | 3.84317   | 1.9964    | 2.18437    | 3.17325    | 3.00349   |
| FO538757.2 | 2.59926    | 2.18359   | 2.51702   | 2.84673    | 2.81279    | 2.09875   |
| FOCAD      | 4.983      | 5.17921   | 4.15966   | 4.45912    | 5.70135    | 5.95236   |
| FOPNL      | 4.02542    | 4.1537    | 4.64459   | 5.33307    | 4.49386    | 5.01353   |
| FOS        | 1.27251    | 1.09945   | 1.05494   | 1.27492    | -1.57243   | -1.89883  |
| FOSL1      | 5.0757     | 4.99863   | 3.46213   | 4.41376    | 3.23754    | 2.94075   |
| FOSL2      | 4.86839    | 4.86076   | 5.29827   | 5.78636    | 7.49654    | 7.11843   |
| FOXA1      | 0.207918   | 0.407614  | 2.01617   | 2.04094    | 2.02271    | 1.43288   |
| FOXC1      | 2.86888    | 2.78983   | 1.12941   | 1.30061    | 3.0761     | 2.61973   |
| FOXC2      | 1.07442    | 1.0276    | -0.628724 | -0.716287  | -6.64581 ? |           |
| FOXD1      | 1.59756    | 1.49341   | 1.35784   | 1.97012 ?  |            | ?         |
| FOXD2      | 3.26526    | 3.39824   | 0.945825  | 0.535117   | -1.04532   | -1.06257  |
| FOXD2-AS1  | 2.19878    | 2.15556   | 1.01621   | 0.798133   | -0.660096  | -0.899103 |
| FOXF1      | -0.611409  | -0.375208 | 5.07385   | 5.20518    | -1.57243   | -1.38442  |
| FOXF2      | -1.14419   | -1.81849  | 3.59455   | 3.68558 ?  |            | ?         |
| FOXG1      | 1.6541     | 1.614     | 2.39014   | 2.63938    | 3.87399    | 3.69417   |
| FOXJ2      | 2.88777    | 3.00273   | 3.55118   | 3.75536    | 2.41384    | 2.43796   |
| FOXJ3      | 5.45158    | 5.54242   | 5.51865   | 5.77379    | 5.31768    | 5.45881   |
| FOXK1      | 5.19951    | 4.98784   | 5.69298   | 5.53321    | 5.42216    | 4.96571   |
| FOXK2      | 5.61574    | 5.47086   | 4.90902   | 5.04296    | 5.97171    | 5.73492   |
| FOXL2NB    | 0.334442   | 0.419895  | 2.51693   | 2.65605 ?  |            | -4.70296  |
| FOXM1      | 6.10446    | 6.04958   | 5.98981   | 6.25926    | 5.72178    | 5.52604   |
| FOXN2      | 5.23017    | 5.43044   | 4.50996   | 4.75535    | 4.48435    | 4.62195   |
| FOXN3      | 5.23843    | 5.0712    | 4.65519   | 4.6845     | 6.06758    | 5.58149   |
| FOXO1      | 2.68247    | 2.87255   | 2.35952   | 2.38704    | 3.61348    | 3.50274   |
| FOXO3      | 5.3409     | 5.2352    | 4.61264   | 4.77154    | 6.64001    | 6.31836   |
| FOXO3B     | 1.89955    | 1.74028   | 1.92239   | 2.04966    | 2.30162    | 1.53846   |
| FOXO4      | 1.69755    | 1.34455   | 0.723445  | 0.913608   | 1.73632    | 1.68564   |
| FOXP1      | -1.02638   | -1.7075   | 5.55246   | 5.74487    | 4.9813     | 4.40441   |
| FOXP1-IT1  | -1.65424   | -1.41808  | 2.12028   | 1.8912     | -1.20056   | -2.12114  |
| FOXP2      | 2.68895    | 2.33607 ? |           | -5.10387 ? |            | -5.69922  |
| FOXP4      | 1.923      | 1.60865   | 2.39392   | 2.12481    | 1.62513    | 1.39136   |
| FOXR2      | 1.7968     | 1.80397 ? |           |            | 2.01567    | 1.70271   |
| FOXRED1    | 4.05997    | 3.86245   | 3.97886   | 4.1067     | 3.29969    | 3.35399   |
| FOXRED2    | 5.17318    | 5.12446   | 4.40143   | 4.28457    | 3.19301    | 2.96218   |
| FPGS       | 2.89711    | 2.5623    | 2.9939    | 3.44767    | 3.51086    | 3.83439   |
| FPGT       | 2.9548     | 3.10103   | 3.0102    | 3.18643    | 2.92931    | 3.55346   |
| FRA10AC1   | 3.5583     | 3.46345   | 3.72937   | 3.5476     | 3.25706    | 2.72375   |
| FRAS1      | 0.840145   | 1.3764    | 3.3749    | 2.77382    | -2.41163   | -1.53638  |
| FRAT2      | 2.51282    | 2.46198   | 1.93025   | 2.03585    | 3.12433    | 3.24166   |
| FREM1      | 4.45258    | 4.16378 ? |           | -6.09892   | -5.65305 ? |           |
| FREM2      | 6.74217    | 6.49841   | -3.59683  | -3.10759   | 4.97222    | 4.40311   |

|           |            |            |            |             |           |           |
|-----------|------------|------------|------------|-------------|-----------|-----------|
| FRG1      | 3.65709    | 3.64632    | 2.59521    | 2.8926      | 3.1239    | 3.54432   |
| FRG1BP    | 0.379776   | 0.382225   | -2.93107   | -3.41363    | 1.22097   | 1.08553   |
| FRG1HP    | 2.20541    | 1.90959    | 1.60137    | 1.97397     | 2.34393   | 2.32666   |
| FRMD3     | 3.884      | 4.30698    | 3.12936    | 3.13673     | 4.19844   | 4.06642   |
| FRMD4A    | 5.98687    | 5.93047    | 2.96846    | 2.97369     | 4.24632   | 3.52354   |
| FRMD4B    | 3.53574    | 3.81676    | 3.07858    | 2.97599     | -6.64581  | -4.70296  |
| FRMD5     | 5.63353    | 5.40827    | 1.98643    | 2.08102     | 5.8679    | 5.49234   |
| FRMD6     | 5.87926    | 6.06193    | 5.0709     | 5.29577     | 5.51271   | 5.71639   |
| FRMD6-AS1 | 1.17133    | 1.26512    | 0.045429   | -0.275776   | -0.184426 | -0.662104 |
| FRMD8     | 5.32499    | 5.53222    | 3.23222    | 3.15091     | 3.46866   | 3.19717   |
| FRMPD4    | 2.28108    | 2.10703 ?  |            | -6.09892    | 0.688494  | 0.463309  |
| FRRS1     | 1.46586    | 1.36374    | 1.82773    | 2.01014     | 2.12107   | 2.32121   |
| FRS2      | 4.26958    | 4.5094     | 3.64143    | 3.83954     | 3.96996   | 4.37676   |
| FRY       | -1.8406    | -1.14061   | 5.53094    | 5.33701     | -2.07475  | -1.24695  |
| FRYL      | 6.1177     | 6.17806    | 5.99511    | 6.10851     | 6.70873   | 6.65164   |
| FSBP      | 1.58568    | 1.73174    | 1.23569    | 1.66815     | 2.38867   | 3.26821   |
| FSCN1     | 5.0757     | 5.07932    | 3.9481     | 4.03793     | 4.2059    | 4.73317   |
| FSCN1P1   | 1.01528    | 1.41843    | 0.229034   | 0.068203    | 0.431174  | 0.50174   |
| FSD1      | 2.41728    | 2.40753    | 2.11571    | 2.27489     | 2.49705   | 2.82467   |
| FSD1L     | 2.91931    | 2.97387    | 3.20019    | 3.19724     | 2.7234    | 2.07467   |
| FSD2      | 1.2901     | 1.46254    | -0.495514  | -0.00403364 | 0.849983  | 0.1145    |
| FSIP1     | -0.0596017 | 0.114234   | -0.598354  | -0.436219   | 0.637833  | 1.4532    |
| FSIP2     | 2.01569    | 2.17755    | -0.0281751 | 0.237833    | 1.88222   | 1.99467   |
| FST       | 2.37775    | 1.41371    | 3.22587    | 3.9342      | -0.490197 | -0.799586 |
| FSTL1     | 6.15459    | 5.84804    | 7.45919    | 7.95066     | 7.37989   | 8.01926   |
| FSTL3     | 1.7439     | 1.8546     | 1.09265    | 1.59165     | 4.15348   | 4.43922   |
| FSTL5     | 5.00685    | 4.29166    | -3.06858   | -4.10635    | -2.45576  | -1.6839   |
| FTH1      | 7.16674    | 6.8485     | 7.96469    | 8.45896     | 8.4477    | 8.63595   |
| FTH1P10   | 4.07873    | 3.7043     | 4.83255    | 5.27365     | 5.28366   | 5.67727   |
| FTH1P11   | 3.56122    | 3.32213    | 4.4362     | 4.8011      | 4.73995   | 5.12336   |
| FTH1P16   | 0.839613   | 0.642443   | 1.42865    | 1.87725     | 1.67889   | 2.10406   |
| FTH1P2    | 4.59609    | 4.1791     | 5.30965    | 5.84011     | 5.72183   | 6.09774   |
| FTH1P20   | 3.96211    | 3.57881    | 4.84552    | 5.19941     | 5.25898   | 5.43206   |
| FTH1P23   | -0.0642099 | -0.0577265 | 0.434423   | 0.55612     | 0.477874  | 0.432799  |
| FTH1P7    | 4.25825    | 3.69022    | 4.82583    | 5.38003     | 5.32698   | 5.70057   |
| FTH1P8    | 3.79743    | 3.47838    | 4.4719     | 5.05258     | 4.89864   | 5.51764   |
| FTL       | 8.36037    | 8.16737    | 10.9831    | 11.7282     | 11.1826   | 11.4108   |
| FTLP2     | -1.37652   | -1.41612   | 1.5048     | 2.20071     | 1.49555   | 1.7865    |
| FTLP3     | 4.96673    | 4.69492    | 7.6854     | 8.36562     | 7.67115   | 8.26735   |
| FTO       | 4.53573    | 4.53009    | 5.3188     | 5.55916     | 6.15345   | 6.08199   |
| FTO-IT1   | 0.108397   | -0.0197685 | 0.945825   | 0.902467    | 0.469063  | 0.200291  |
| FTSJ1     | 4.47772    | 4.63189    | 3.20449    | 3.75381     | 3.87302   | 4.31148   |
| FTSJ2     | 4.5134     | 4.53644    | 3.91844    | 4.32683     | 5.12474   | 5.28693   |
| FTSJ3     | 6.08537    | 6.16465    | 5.0213     | 5.45747     | 6.99622   | 6.73239   |
| FTX       | 3.63004    | 3.70085    | 4.82747    | 4.64073     | 4.51412   | 4.00986   |
| FUBP1     | 6.59782    | 6.65704    | 6.67948    | 6.80929     | 6.69984   | 6.27376   |
| FUBP3     | 4.86982    | 5.02448    | 4.31033    | 4.66843     | 5.24506   | 4.98676   |
| FUCA1     | 3.59209    | 3.3637     | 3.61089    | 3.49294     | 3.04878   | 3.17593   |
| FUCA2     | -2.9975    | -2.46206   | 4.82851    | 5.21876     | 6.51782   | 6.94216   |
| FUK       | 2.39633    | 2.33483    | 2.2841     | 2.45343     | 2.53692   | 2.354     |
| FUNDC1    | 2.06581    | 1.94657    | 0.431281   | 0.902467    | 1.72773   | 2.42258   |
| FUNDC2    | 4.22554    | 4.08211    | 3.5191     | 3.78622     | 5.04278   | 5.6254    |



|            |          |          |            |           |            |          |
|------------|----------|----------|------------|-----------|------------|----------|
| FURIN      | 5.60184  | 5.70112  | 4.669      | 4.8954    | 5.1029     | 5.08281  |
| FUS        | 6.36698  | 6.26152  | 6.80341    | 6.64022   | 5.77688    | 5.50405  |
| FUT10      | 3.33021  | 3.26167  | 2.7113     | 2.58118   | 3.45863    | 3.38074  |
| FUT11      | 3.9282   | 4.14142  | 3.26269    | 3.57375   | 5.70594    | 5.39306  |
| FUT4       | 1.80345  | 1.45273  | -0.164687  | -0.494056 | 1.19149    | 0.576348 |
| FUT8       | 4.24781  | 4.52646  | 5.19136    | 5.07553   | 4.53789    | 5.27617  |
| FUZ        | 2.42069  | 2.32982  | 1.94529    | 1.83331   | 0.423062   | 0.695691 |
| FXN        | 1.87838  | 2.0007   | 1.35568    | 1.4905    | 1.64771    | 1.44307  |
| FXR1       | 6.17116  | 6.06589  | 6.73075    | 6.84614   | 7.06358    | 6.94312  |
| FXR2       | 4.74631  | 4.59983  | 4.33016    | 4.62066   | 5.01118    | 4.87255  |
| FXYD3      | 3.85359  | 3.67798  | -3.37468   | -2.93781  | -1.95932   | -2.70579 |
| FXYD5      | 4.86886  | 4.79571  | 4.76411    | 5.10791   | 4.25032    | 4.28905  |
| FYCO1      | 4.60467  | 4.80393  | 4.49418    | 4.76767   | 5.07228    | 5.20468  |
| FYN        | 3.57936  | 3.57607  | 0.517004   | 1.16735   | 3.69174    | 3.36475  |
| FYTTD1     | 5.19459  | 5.44026  | 5.63705    | 6.05575   | 6.65425    | 7.19166  |
| FZD1       | 5.62425  | 5.87337  | 3.35758    | 3.22209   | 2.97994    | 2.52212  |
| FZD2       | 1.90086  | 1.24456  | 3.3653     | 3.55295   | 1.50464    | 1.56945  |
| FZD3       | 4.96046  | 5.00425  | 0.571444   | 0.158078  | 4.79141    | 4.44809  |
| FZD4       | 3.25441  | 2.86015  | 3.75695    | 3.81964   | 3.9539     | 3.97824  |
| FZD5       | 2.6206   | 2.05681  | 2.02107    | 1.69211   | 3.2866     | 2.64644  |
| FZD6       | 5.0553   | 5.77519  | 2.57804    | 2.74605   | 5.72824    | 6.34855  |
| FZD7       | 2.88024  | 2.93162  | 5.45716    | 5.71254   | 3.21774    | 2.74862  |
| FZD8       | 3.31773  | 2.96342  | 0.27602    | -0.436219 | 1.74486    | 1.80111  |
| FZR1       | 3.6138   | 3.49715  | 3.39579    | 3.47614   | 4.66386    | 4.71849  |
| G0S2       | ?        | -5.45651 | 2.93542    | 4.04725   | -6.64581 ? |          |
| G2E3       | 4.94174  | 4.99207  | 4.16066    | 4.27888   | 4.63698    | 4.87986  |
| G3BP1      | 7.43955  | 7.96852  | 7.48227    | 8.08916   | 7.61875    | 8.07647  |
| G3BP2      | 6.95064  | 6.98697  | 6.36267    | 6.69287   | 8.18055    | 8.40855  |
| G6PC3      | 3.78474  | 3.89581  | 4.14403    | 4.2995    | 3.78676    | 4.24311  |
| G6PD       | 4.77352  | 4.54087  | 6.68173    | 6.85655   | 6.43092    | 6.60119  |
| GAA        | 3.26959  | 2.67159  | 4.28103    | 4.03072   | 1.91715    | 1.55071  |
| GAB1       | 3.19725  | 3.03301  | 3.29828    | 2.96532   | 3.70053    | 3.0041   |
| GAB2       | 4.64688  | 4.56367  | 1.98643    | 2.1904    | 2.31984    | 1.97981  |
| GAB3       | 0.41996  | 0.859151 | -1.48269   | -0.860651 | 0.661695   | 1.06153  |
| GABARAP    | 4.21586  | 4.32499  | 4.26903    | 4.76049   | 5.56845    | 6.34414  |
| GABARAPL1  | 1.88591  | 1.82752  | 5.2723     | 5.54805   | 4.37519    | 4.3992   |
| GABARAPL2  | 4.59669  | 4.54067  | 4.51518    | 4.79051   | 4.22615    | 4.70798  |
| GABBR1     | 3.08344  | 2.90238  | 2.86067    | 2.72725   | 1.8276     | 1.1012   |
| GABPA      | 3.76735  | 3.73113  | 4.06574    | 4.0138    | 4.31474    | 3.95754  |
| GABPB1     | 4.68861  | 4.6859   | 4.15746    | 4.38507   | 4.19286    | 4.11887  |
| GABPB1-AS1 | 5.63647  | 5.69499  | 4.82628    | 4.73741   | 5.54216    | 4.85419  |
| GABPB2     | -2.9975  | -2.76144 | 2.38635    | 1.93559   | 2.51463    | 1.95865  |
| GABRA2     | -5.10914 | -1.55554 | 7.45875    | 7.44035 ? |            | ?        |
| GABRA3     | 2.53455  | 2.30204  | 0.0833836  | -0.201784 | 3.37861    | 3.15438  |
| GABRB3     | -5.10914 | -3.87578 | 5.0715     | 5.20177 ? |            | ?        |
| GABRE      | 2.32053  | 2.33158  | 5.25786    | 5.34494   | 4.48051    | 4.50881  |
| GABRQ      | 2.39105  | 2.28872  | -2.48229   | -1.86039  | 2.36484    | 2.08121  |
| GAD1       | 3.05686  | 3.01838  | -1.42826   | -1.35358  | 1.84146    | 1.24753  |
| GADD45A    | 3.01517  | 3.14079  | 3.06441    | 3.4948    | 2.1852     | 2.18812  |
| GADD45B    | 1.84784  | 1.71211  | 2.52385    | 2.85984   | 3.69504    | 3.82661  |
| GADD45GIP1 | 3.64229  | 3.44835  | 3.46483    | 3.79047   | 4.58422    | 4.97419  |
| GAGE1      | 3.5591   | 3.47234  | -6.17309 ? |           | -11.1751 ? |          |

|          |           |           |             |          |            |           |
|----------|-----------|-----------|-------------|----------|------------|-----------|
| GAGE12C  | 2.48514   | 2.24436   | -8.43308    | -8.04317 | -7.60486 ? |           |
| GAGE12D  | 3.14461   | 3.08155   | -8.43308    | -8.04317 | -7.60486 ? |           |
| GAGE12E  | 2.60495   | 2.26431   | -7.51197    | -7.1163  | -6.67315 ? |           |
| GAGE12J  | 3.85685   | 3.72602 ? |             | -6.09892 | -8.5559 ?  |           |
| GAGE2A   | 5.1472    | 5.04941   | -4.18092    | -6.09892 | -6.64581 ? |           |
| GAK      | 5.41856   | 5.18909   | 3.63186     | 3.87985  | 4.73092    | 4.65742   |
| GALE     | 4.09858   | 4.05383   | 3.56467     | 4.21422  | 4.41315    | 5.08444   |
| GALK1    | 2.0986    | 2.02501   | 1.8609      | 2.22211  | 1.90957    | 2.84019   |
| GALK2    | 3.18218   | 3.40149   | 3.50757     | 3.72039  | 3.11547    | 3.65841   |
| GALNS    | 3.76444   | 3.53715   | 4.28713     | 4.42158  | 3.31697    | 3.13249   |
| GALNT1   | 5.97752   | 6.03073   | 5.32179     | 5.55917  | 5.29099    | 5.63645   |
| GALNT10  | 4.64077   | 4.77615   | 5.433       | 5.76423  | 6.41346    | 6.77      |
| GALNT11  | 4.89291   | 4.95691   | 3.94664     | 4.2072   | 4.90824    | 5.06434   |
| GALNT13  | 3.21531   | 3.3103    | -6.17309    | -6.09892 | 2.09793    | 2.45317   |
| GALNT18  | 3.82447   | 3.77077   | 1.68069     | 1.90801  | -1.53062   | -1.70626  |
| GALNT2   | 7.74876   | 7.30776   | 6.54955     | 6.46125  | 6.83693    | 5.90751   |
| GALNT4   | 3.28384   | 3.10576   | 2.75713     | 2.86875  | 2.7677     | 2.46543   |
| GALNT5   | 5.11229   | 4.7245    | -1.93506    | -1.30113 | 3.55158    | 4.03475   |
| GALNT6   | -6.68418  | -5.45651  | -4.18092    | -3.52222 | 1.90577    | 2.33222   |
| GALNT7   | 5.38204   | 5.51227   | 6.04289     | 6.36458  | 5.9606     | 6.3475    |
| GALNT9   | ?         | -4.45968  | 1.78836     | 2.64017  | -5.07051 ? |           |
| GALT     | 2.69347   | 2.62381   | 3.45892     | 3.6232   | 0.631225   | 0.633217  |
| GAMT     | 2.16203   | 2.18463   | 2.19153     | 2.33827  | 1.77435    | 2.38606   |
| GAN      | 5.55239   | 5.34731   | 4.63265     | 4.65519  | 5.2081     | 4.36875   |
| GANAB    | 8.11859   | 8.01409   | 8.07018     | 8.20347  | 7.37165    | 7.10945   |
| GANC     | 2.74368   | 2.47485   | 2.78751     | 3.0273   | 3.3748     | 3.68672   |
| GAP43    | -1.14419  | -0.58     | -6.17309    | -4.52056 | 1.97271    | 3.48311   |
| GAPDH    | 10.3264   | 10.6092   | 10.2873     | 11.003   | 11.1546    | 11.1026   |
| GAPDHP1  | 6.0851    | 6.53873   | 6.30965     | 7.00619  | 7.04016    | 6.94583   |
| GAPDHP33 | 1.45071   | 1.9252    | -3.01245    | -3.78492 | -2.95876   | -4.11926  |
| GAPDHP38 | 0.395633  | 1.35118   | 1.07702     | 1.77014  | 1.22071    | 0.957699  |
| GAPDHP40 | 1.39366   | 1.98105   | 1.84559     | 2.48402  | 2.62884    | 2.50251   |
| GAPDHP55 | 1.80477   | 1.54842   | -3.18222    | -3.30006 | 1.24663    | 0.33778   |
| GAPDHP60 | 1.93847   | 2.50841   | 2.34125     | 2.88388  | 2.70281    | 2.64525   |
| GAPDHP61 | 0.799941  | 1.12262   | 1.47598     | 1.50702  | 1.29582    | 0.703367  |
| GAPDHP63 | 0.680621  | 1.62667   | 1.29377     | 1.95933  | 1.93529    | 1.77263   |
| GAPDHP65 | 4.51774   | 4.99191   | 4.85845     | 5.53256  | 5.76374    | 5.4381    |
| GAPDHP69 | -2.93383  | -2.55512  | 0.23271     | 1.14516  | 1.4382     | 1.97372   |
| GAPDHP70 | -0.541259 | 0.0526385 | -0.00109109 | 0.420391 | 0.558944   | -0.560251 |
| GAPDHP71 | 0.833651  | 1.27274   | 0.831788    | 1.19121  | 1.30219    | 0.55715   |
| GAPDHP72 | 0.135929  | 0.776651  | 0.903555    | 1.38977  | 1.20722    | 0.853676  |
| GAPVD1   | 6.34922   | 6.23302   | 5.97381     | 6.09053  | 6.17633    | 5.97495   |
| GAR1     | 2.72299   | 2.62992   | 1.71738     | 1.85699  | 2.71908    | 2.677     |
| GAREM    | 4.67052   | 4.12438   | 3.0517      | 3.18527  | 0.913562   | 0.21303   |
| GARNL3   | 1.61837   | 1.28539   | 1.20884     | 1.22214  | 0.997957   | 0.401903  |
| GARS     | 5.85359   | 5.9868    | 5.64143     | 6.29019  | 6.46844    | 6.587     |
| GART     | 5.80666   | 5.90521   | 5.56768     | 6.01383  | 5.85948    | 6.25029   |
| GAS1     | 2.43793   | 2.52016   | -2.27595    | -2.52305 | 1.59711    | 2.03478   |
| GAS2L1   | 1.87838   | 1.97181   | 2.22164     | 2.6157   | 1.64806    | 1.92993   |
| GAS2L3   | 5.02499   | 5.08355   | 3.55963     | 4.04978  | 4.47476    | 4.49295   |
| GAS5     | 6.48191   | 6.67879   | 5.18988     | 5.55027  | 6.75395    | 6.97979   |
| GAS5-AS1 | 1.2317    | 1.61934   | 0.945825    | 0.935626 | 1.26455    | 0.937201  |

|          |            |             |           |           |            |            |
|----------|------------|-------------|-----------|-----------|------------|------------|
| GAS6     | -2.05464   | -1.81849    | 2.53346   | 2.83294   | 3.75892    | 4.16186    |
| GAS7     | 8.45451    | 8.14802     | 0.225978  | 0.19507   | -1.37455   | -1.53638   |
| GAS8     | 4.30894    | 4.2025      | 3.49142   | 3.73558   | 3.43843    | 3.17162    |
| GATA2    | 0.108397   | 0.107125    | 0.0645242 | 0.367002  | 0.990802   | 0.816919   |
| GATA3    | 0.567789   | -0.0364475  | 1.31637   | 0.845438  | 0.210164   | -0.31423   |
| GATA4    | -1.74441   | -1.87737    | 1.18285   | 1.49854 ? | ?          |            |
| GATA6    | 1.16711    | 1.45897     | -0.209944 | 0.367002  | 0.477739   | -0.0627204 |
| GATAD1   | 4.49013    | 4.51799     | 5.50078   | 5.46907   | 4.45278    | 4.35127    |
| GATAD2A  | 4.83668    | 4.79218     | 4.60356   | 4.71454   | 5.73147    | 5.36005    |
| GATAD2B  | 4.73502    | 4.66321     | 4.55962   | 4.42935   | 4.41516    | 3.98851    |
| GATB     | 3.35614    | 3.3177      | 2.91763   | 3.19462   | 3.09965    | 3.39453    |
| GATC     | 4.69772    | 4.80553     | 4.3722    | 4.66724   | 4.56253    | 4.90566    |
| GATM     | -2.89067   | -1.93875    | -3.59683  | -5.10387  | 3.42183    | 3.48311    |
| GATS     | 2.24625    | 1.48516     | 2.86871   | 2.63597   | 1.65205    | 1.02246    |
| GATSL2   | 0.866655   | 0.411817    | 1.18659   | 0.910088  | 1.0689     | 0.556228   |
| GATSL3   | 0.628736   | 0.0493938   | 0.961697  | 1.1316    | 0.614041   | 1.15234    |
| GBA      | 6.27168    | 6.09457     | 5.31756   | 5.73751   | 5.47319    | 5.76067    |
| GBA2     | 4.51214    | 4.35044     | 4.12049   | 4.27155   | 6.53474    | 6.29892    |
| GBAP1    | 1.97114    | 1.95592     | 2.13616   | 2.26987   | 1.35577    | 1.01381    |
| GBAS     | 5.03818    | 4.77912     | 4.42657   | 4.4515    | 5.72878    | 5.75986    |
| GBE1     | 4.55889    | 4.50725     | 6.25057   | 6.08653   | 6.55568    | 6.23653    |
| GBF1     | 5.09085    | 5.14031     | 5.77102   | 5.95253   | 5.51273    | 5.45567    |
| GBP1     | 2.59773    | 2.91641     | 4.90759   | 5.20453   | 4.257      | 4.31147    |
| GBP2     | 4.1828     | 3.84778     | 5.30179   | 5.84019   | 4.5467     | 4.51244    |
| GBP3     | 2.25804    | 2.47968     | 4.12709   | 4.54527   | 3.54304    | 4.04483    |
| GBP4     | -0.632781  | 0.137189    | 5.03561   | 5.61778   | -2.85193   | -4.70296   |
| GBP5     | -4.37417 ? |             | 0.460428  | 1.06115   | 2.25857    | 1.38079    |
| GCA      | 0.973215   | 1.11463     | 1.82213   | 1.48367   | 1.70941    | 1.76905    |
| GCAT     | 2.3884     | 2.28685     | 2.12484   | 2.6225    | 2.89428    | 3.12301    |
| GCC1     | 4.58153    | 4.666       | 3.82369   | 4.38207   | 4.67137    | 4.78613    |
| GCC2     | 5.65966    | 5.72493     | 5.24962   | 5.45611   | 5.44819    | 5.61868    |
| GCDH     | 2.16944    | 1.97098     | 2.02778   | 2.36765   | 2.74802    | 2.70015    |
| GCFC2    | 3.67614    | 3.74306     | 2.81084   | 2.90654   | 3.86747    | 4.02101    |
| GCH1     | 1.24348    | 1.20963     | 0.259532  | 0.491176  | 1.29974    | 1.20023    |
| GCLC     | 3.97594    | 4.10985     | 5.86699   | 6.18692   | 4.76122    | 4.72373    |
| GCLM     | 4.78323    | 5.21176     | 6.11712   | 6.75656   | 5.97829    | 6.18809    |
| GCN1     | 6.96724    | 7.04109     | 6.26793   | 6.51413   | 6.93401    | 6.75757    |
| GCNT1    | 3.2782     | 3.025       | 1.48185   | 2.03075   | 4.49704    | 5.01096    |
| GCNT2    | 1.73974    | 1.88148     | 5.16795   | 5.32059   | 5.88367    | 5.62196    |
| GCOM2    | 0.403475   | 0.585866    | 0.181026  | 1.06678   | 0.878576   | 1.66429    |
| GCSH     | 3.5248     | 3.04127     | 2.71679   | 2.31094   | 3.22064    | 3.09475    |
| GCSHP5   | 3.44534    | 2.86954     | 2.67193   | 2.54733   | 3.00388    | 3.62993    |
| GDAP1    | 4.26237    | 4.51658     | 3.583     | 3.48175   | 3.65143    | 4.22106    |
| GDAP2    | 5.27174    | 5.42398     | 5.01675   | 5.23101   | 6.30527    | 6.44017    |
| GDE1     | 4.85693    | 4.91273     | 5.1333    | 5.58378   | 5.18045    | 5.37276    |
| GDF11    | 4.69864    | 4.43077     | 4.25362   | 4.03068   | 4.10095    | 3.68274    |
| GDF15    | 0.61388    | -0.00328298 | 1.86635   | 2.32582   | 2.57332    | 2.32121    |
| GDI1     | 5.1801     | 5.08356     | 5.04289   | 5.35928   | 6.37959    | 6.09012    |
| GDI2     | 6.53593    | 6.5376      | 5.77888   | 6.21409   | 6.92197    | 7.48498    |
| GDI2P2   | 2.04152    | 2.13607     | 0.948616  | 1.79477   | 2.16584    | 2.51208    |
| GDNF     | 5.09368    | 4.77794     | 0.27602   | -0.327299 | -2.95876   | -2.8983    |
| GDNF-AS1 | 1.17748    | 1.8272      | -0.790968 | -0.649181 | -5.65305 ? |            |

|        |           |           |           |           |            |           |
|--------|-----------|-----------|-----------|-----------|------------|-----------|
| GDPD1  | 1.27251   | 1.15192   | -0.428455 | -0.201784 | 0.539452   | 0.752791  |
| GDPD5  | 1.61384   | 1.36374   | 2.03082   | 2.36692   | -4.07293 ? |           |
| GDPGP1 | 1.36166   | 1.48589   | 0.861241  | 1.05132   | 1.48948    | 1.55071   |
| GEM    | 2.26384   | 2.43803   | 2.25528   | 3.4206    | 4.23374    | 4.56823   |
| GEMIN2 | 2.43022   | 2.40753   | 1.3479    | 1.71775   | 2.01919    | 3.028     |
| GEMIN4 | 4.88888   | 4.89911   | 4.21948   | 4.43612   | 5.32269    | 5.23066   |
| GEMIN5 | 5.16122   | 5.24019   | 5.1485    | 5.53637   | 5.16504    | 5.0515    |
| GEMIN6 | 3.81761   | 3.72943   | 2.93022   | 3.16264   | 4.19689    | 4.75986   |
| GEMIN7 | 2.67913   | 2.49525   | 2.23117   | 2.41547   | 3.15412    | 3.45133   |
| GEMIN8 | 1.399     | 1.54842   | 0.925065  | 0.978694  | 1.48439    | 1.65964   |
| GEN1   | 5.09738   | 5.08886   | 4.50909   | 4.50312   | 5.14019    | 5.09256   |
| GET4   | 2.98618   | 2.53852   | 3.2735    | 3.30302   | 3.03037    | 2.92688   |
| GFAP   | -0.113974 | -0.177293 | -1.42826  | -0.938639 | 4.49779    | 5.46703   |
| GFER   | 2.91336   | 2.74083   | 2.77715   | 2.96764   | 2.74183    | 3.02866   |
| GFM1   | 5.15928   | 5.26848   | 5.37297   | 5.76346   | 5.82197    | 5.99068   |
| GFM2   | 4.38267   | 4.28952   | 4.83689   | 5.39431   | 4.55072    | 5.08568   |
| GFOD1  | 1.64968   | 1.8926    | 2.56543   | 3.0661    | 3.13735    | 2.7725    |
| GFOD2  | 3.51523   | 3.63519   | 3.96368   | 4.07729   | 4.87057    | 4.54121   |
| GFPT1  | 5.90911   | 6.02424   | 5.78657   | 6.40392   | 6.13591    | 6.22657   |
| GFPT2  | 4.20254   | 4.50654   | 2.57138   | 3.38903   | 4.72501    | 4.8848    |
| GFRA1  | 4.97686   | 5.17149   | 5.51645   | 5.28082   | 7.43917    | 7.2148    |
| GGA1   | 4.3002    | 4.1491    | 4.13501   | 4.19267   | 3.8235     | 3.38074   |
| GGA2   | 5.23533   | 5.15829   | 5.03745   | 5.19036   | 5.56035    | 4.96747   |
| GGA3   | 3.41607   | 3.27529   | 4.09959   | 4.18468   | 4.37597    | 4.2285    |
| GGCT   | 4.74741   | 4.68988   | 4.06193   | 4.2939    | 4.82541    | 5.28609   |
| GGCX   | 5.2906    | 5.4261    | 5.32982   | 5.65271   | 4.73179    | 4.91042   |
| GGH    | 4.78825   | 4.94813   | 4.56467   | 5.0896    | 4.05308    | 4.81095   |
| GGNBP2 | 5.20404   | 5.13613   | 5.5221    | 5.57416   | 5.41315    | 5.04816   |
| GGPS1  | 3.08882   | 3.08019   | 3.42381   | 3.65439   | 3.58286    | 4.01096   |
| GGT1   | -5.10914  | -3.65369  | 2.07154   | 2.10071   | -0.43131   | -0.899103 |
| GGT7   | 3.88306   | 3.79807   | 3.33808   | 3.47048   | 2.59237    | 2.65524   |
| GHDC   | 2.28678   | 1.93378   | 2.37491   | 2.39501   | 1.61585    | 1.8479    |
| GHITM  | 6.00035   | 5.98269   | 5.63664   | 6.26676   | 6.6774     | 7.26181   |
| GHR    | 1.34536   | 1.96763   | -1.79072  | -2.40763  | -6.64581 ? |           |
| GHRLOS | 0.468531  | 0.479758  | 0.633803  | 0.383121  | -0.415944  | -1.38442  |
| GID4   | 2.59555   | 2.77557   | 2.50649   | 2.83662   | 2.21007    | 2.55539   |
| GID8   | 5.51675   | 5.33885   | 4.56382   | 4.52325   | 5.71173    | 5.22697   |
| GIGYF1 | 4.87834   | 4.41903   | 4.30632   | 4.29205   | 4.32268    | 3.57869   |
| GIGYF2 | 6.05934   | 6.06978   | 6.19602   | 6.42301   | 6.21326    | 5.81922   |
| GIMAP2 | -0.191134 | 0.013012  | 2.12484   | 2.48738   | -2.20023   | -0.848487 |
| GIN1   | 1.64525   | 1.79457   | 2.49948   | 2.4799    | 2.35651    | 3.0178    |
| GINM1  | 3.7228    | 3.7392    | 4.24054   | 4.47512   | 4.94414    | 5.14267   |
| GINS1  | 5.45604   | 5.76235   | 4.4108    | 4.98128   | 4.14382    | 4.28055   |
| GINS2  | 4.45108   | 4.46014   | 4.1028    | 4.43102   | 4.06742    | 4.2255    |
| GINS3  | 2.90147   | 3.01264   | 2.68001   | 3.17544   | 3.53364    | 3.74226   |
| GINS4  | 5.1573    | 5.23621   | 4.07045   | 4.44353   | 3.72517    | 3.65184   |
| GIPC1  | 4.94521   | 4.38656   | 3.76776   | 3.88411   | 5.39803    | 5.22697   |
| GIPC3  | 1.38311   | 1.045 ?   |           | -5.10387  | -4.33548 ? |           |
| GIPR   | -1.30642  | -2.00285  | 0.73541   | 0.902467  | 0.643551   | 0.126299  |
| GIT1   | 3.88305   | 3.67925   | 4.0926    | 4.34752   | 4.5947     | 4.35263   |
| GIT2   | 4.85348   | 4.85856   | 4.51124   | 4.62905   | 4.45195    | 4.1291    |
| GJA1   | 3.63901   | 4.12852   | 6.64783   | 6.40534   | 6.72657    | 6.56691   |

|          |           |           |            |            |            |           |
|----------|-----------|-----------|------------|------------|------------|-----------|
| GJC1     | 6.24254   | 6.19558   | 5.87074    | 5.86377    | 5.44624    | 5.00838   |
| GK       | 0.381339  | 0.17104   | 2.20868    | 2.48336    | 0.739407   | 0.709326  |
| GK5      | 3.79377   | 4.03599   | 3.99513    | 4.17888    | 3.80728    | 3.48558   |
| GKAP1    | 0.595628  | 0.6247    | -0.0541032 | -0.131402  | -0.0308197 | -0.421131 |
| GLA      | 4.37171   | 4.58631   | 5.28511    | 5.78788    | 4.84352    | 5.2482    |
| GLB1     | 5.39895   | 5.22283   | 5.09274    | 5.40939    | 5.36855    | 5.53589   |
| GLB1L    | 1.82451   | 1.52019   | 2.37491    | 2.23992    | 1.42719    | 1.47324   |
| GLCC11   | 2.34315   | 2.18435   | 2.26971    | 1.94041    | 1.40201    | 0.594214  |
| GLCE     | 5.33913   | 5.76054   | 6.02194    | 6.54376    | 3.71799    | 4.30311   |
| GLDN     | -0.175367 | 0.0918691 | 3.77936    | 4.97066    | 2.25559    | 1.64205   |
| GLE1     | 4.18121   | 4.2358    | 4.22257    | 4.58101    | 4.37233    | 4.32937   |
| GLG1     | 7.16675   | 7.20962   | 7.67421    | 7.93468    | 6.84835    | 6.5012    |
| GLI1     | 2.62511   | 2.43803   | 0.292311   | 0.520618   | -3.6585    | -4.11926  |
| GLI2     | 4.47147   | 4.66256   | 0.517004   | 0.430424 ? |            | -5.69922  |
| GLI3     | 4.75523   | 4.42285   | 4.51779    | 4.22208    | 5.36067    | 4.84402   |
| GLI4     | 0.629212  | 0.382745  | 1.87665    | 1.82137    | 1.49434    | 1.18601   |
| GLIDR    | 0.182184  | 0.51925   | -1.24156   | -1.70413   | 0.838871   | 1.20341   |
| GLIPR1   | 4.452     | 4.72716   | 5.1019     | 5.59849    | 6.62645    | 6.85132   |
| GLIPR2   | -0.272655 | -0.734698 | 2.13391    | 2.34651    | 4.56971    | 5.02034   |
| GLIS2    | 0.129942  | 0.102389  | 1.02577    | 1.18328    | 1.11038    | 0.0705267 |
| GLIS3    | 4.05756   | 3.77606   | 4.18877    | 4.51653    | 6.28619    | 5.91511   |
| GLMN     | 2.77868   | 2.9801    | 2.34397    | 2.51324    | 2.41652    | 3.30171   |
| GLMP     | 5.14093   | 4.9513    | 2.937      | 3.04613    | 4.19533    | 4.27912   |
| GLO1     | 6.19999   | 6.33397   | 5.63263    | 6.08687    | 6.73873    | 7.40541   |
| GLOD4    | 3.80149   | 3.84589   | 4.08585    | 4.44355    | 4.48472    | 4.72857   |
| GLP2R    | -4.37417  | -4.13839  | 3.35176    | 3.33825    | -6.64581 ? |           |
| GLRB     | 2.14329   | 2.47086   | 0.838911   | 1.14862    | 3.92183    | 3.7383    |
| GLRX     | 1.46083   | 1.60865   | 3.92107    | 4.5202     | 2.50319    | 3.14504   |
| GLRX2    | 2.60926   | 2.62727   | 1.90396    | 2.63265    | 2.39499    | 2.87449   |
| GLRX3    | 4.43101   | 4.54159   | 4.5021     | 5.09019    | 4.89695    | 5.53642   |
| GLRX3P2  | 2.22791   | 2.4431    | 2.4854     | 2.88849    | 2.81826    | 3.46319   |
| GLRX5    | 4.18885   | 4.33605   | 2.74244    | 3.23842    | 4.4244     | 4.47538   |
| GLS      | 5.94067   | 6.0968    | 6.62096    | 6.85065    | 7.41006    | 7.17528   |
| GLT8D1   | 5.11149   | 5.19189   | 4.4749     | 4.66707    | 4.81021    | 5.07034   |
| GLT8D2   | 0.480917  | 0.166625  | 0.945817   | 1.82784    | 1.16629    | 2.02123   |
| GLTP     | 4.34246   | 4.40452   | 2.96336    | 3.30222    | 4.36293    | 4.35645   |
| GLTPP1   | 0.123415  | 0.665247  | -1.65146   | -0.487498  | 0.336855   | 0.10494   |
| GLTSCR1  | 0.231764  | 0.107125  | 0.925065   | 0.833756   | 0.539452   | 0.126299  |
| GLTSCR1L | 2.69753   | 2.88145   | 2.24695    | 2.49851    | 3.55035    | 3.5624    |
| GLTSCR2  | 4.01223   | 3.73176   | 3.42313    | 3.57503    | 4.11232    | 4.34882   |
| GLUD1    | 4.88288   | 4.95059   | 5.00612    | 5.6276     | 5.81223    | 6.31749   |
| GLUD2    | 3.11437   | 3.09622   | 3.20439    | 3.75482    | 3.99483    | 4.50719   |
| GLUL     | 4.95687   | 4.8173    | 5.76227    | 6.32421    | 2.96905    | 3.56241   |
| GLYCTK   | 2.1713    | 2.02903   | 1.62879    | 1.54942    | 1.91336    | 1.71117   |
| GLYR1    | 4.77564   | 4.80798   | 4.95851    | 5.12837    | 4.98397    | 4.70899   |
| GM2A     | 4.2988    | 4.36529   | 5.25734    | 5.60068    | 3.7277     | 4.0212    |
| GMCL1    | 3.8016    | 3.93725   | 3.12909    | 3.49025    | 3.68322    | 3.70478   |
| GMDS     | 2.57938   | 2.48845   | 2.20881    | 2.37097    | 3.2645     | 3.09742   |
| GMDS-AS1 | 1.17133   | 1.28539   | 2.18718    | 1.76772    | 2.07442    | 1.80902   |
| GMEB1    | 3.20781   | 3.23064   | 2.51693    | 2.43035    | 3.83054    | 3.40181   |
| GMEB2    | 2.94478   | 2.74174   | 2.85266    | 3.09085    | 2.8073     | 2.84019   |
| GMFB     | 5.94289   | 5.87581   | 4.82806    | 5.13062    | 6.03798    | 6.56521   |

|           |            |            |            |           |           |             |
|-----------|------------|------------|------------|-----------|-----------|-------------|
| GMFG      | -5.69162   | -5.45651   | 1.5647     | 1.76157   | -5.65305  | -5.69922    |
| GMIP      | 0.207918   | 0.137189   | 1.06446    | 0.924662  | 1.5394    | 1.80902     |
| GMNN      | 3.96359    | 3.95288    | 3.45673    | 3.67253   | 4.56909   | 5.17745     |
| GMPPA     | 3.36835    | 3.27525    | 3.79375    | 4.25201   | 3.84152   | 3.93534     |
| GMPPB     | 4.80534    | 4.52576    | 4.06796    | 4.35526   | 4.5043    | 4.19069     |
| GMPR      | -3.2383    | -2.87684   | 1.24279    | 1.81006   | 2.02271   | 1.87074     |
| GMPR2     | 4.26454    | 4.37004    | 3.26356    | 3.66431   | 4.54548   | 5.01694     |
| GMPS      | 5.70613    | 5.7331     | 6.12566    | 6.38216   | 5.97172   | 6.15187     |
| GMPSPI    | 2.22779    | 2.30873    | 2.67422    | 3.18676   | 2.72169   | 2.95655     |
| GNA11     | 3.96536    | 3.50079    | 4.00876    | 4.33618   | 4.8708    | 4.62083     |
| GNA12     | 4.85407    | 4.4312     | 5.45173    | 5.39101   | 5.09082   | 4.43538     |
| GNA13     | 5.79051    | 5.73221    | 6.02867    | 6.23961   | 6.58714   | 6.39396     |
| GNAI1     | 3.33021    | 3.07243    | 4.39296    | 4.51413   | 3.12433   | 3.12934     |
| GNAI2     | 6.57094    | 6.67428    | 6.06143    | 6.45269   | 7.27477   | 7.37463     |
| GNAI3     | 6.30822    | 6.4893     | 6.13128    | 6.58158   | 7.2528    | 7.43533     |
| GNAL      | -0.607786  | -0.0346272 | 2.75216    | 3.12076   | 0.26883   | 0.202186    |
| GNAO1     | 2.57705    | 2.32508    | 1.57806    | 1.42259   | -1.80184  | -2.00571    |
| GNAQ      | 4.62091    | 4.41462    | 4.47577    | 4.64019   | 4.19864   | 3.77663     |
| GNAS      | 7.87842    | 7.53632    | 7.76367    | 7.73596   | 8.14917   | 7.63582     |
| GNAZ      | 1.20183    | 1.34455    | 2.27182    | 2.64273   | -1.16815  | -0.497071   |
| GNB1      | 6.48603    | 6.23342    | 6.49572    | 6.71868   | 7.58578   | 7.25781     |
| GNB1L     | 0.999675   | 0.729183   | -0.0555613 | 0.323981  | -0.228958 | 0.443225    |
| GNB2      | 4.77461    | 4.58427    | 4.55203    | 4.8063    | 4.86324   | 5.28551     |
| GNB2L1    | 8.51603    | 8.48279    | 8.38678    | 8.89404   | 9.48005   | 9.75684     |
| GNB3      | 1.18877    | 0.88121    | 0.462722   | 0.511569  | 0.0275929 | -0.687574   |
| GNB4      | 5.98824    | 6.10306    | 5.65401    | 5.9529    | 5.99944   | 5.82666     |
| GNB5      | 3.81365    | 3.86211    | 3.19514    | 3.45927   | 3.55336   | 3.6398      |
| GNL       | 4.90361    | 5.27015    | 5.17732    | 5.68232   | 5.16265   | 5.10947     |
| GNG10     | 3.92886    | 4.19983    | 4.33024    | 4.82212   | 4.0119    | 4.3362      |
| GNG11     | 3.68893    | 3.70707    | 5.59824    | 5.80555   | 3.5888    | 4.48927     |
| GNG12     | 7.16131    | 7.39445    | 5.69375    | 6.40168   | 6.98534   | 7.3736      |
| GNG2      | 4.69858    | 4.76295    | 4.69986    | 4.98985   | 2.93029   | 3.5003      |
| GNG4      | 2.32053    | 2.34774    | 0.723445   | 0.845438  | -2.85193  | -2.8983     |
| GNG5      | 4.02594    | 3.61255    | 3.96228    | 4.15124   | 4.77641   | 4.86494     |
| GNL1      | 4.91622    | 4.85099    | 4.63646    | 4.88636   | 5.70512   | 5.97974     |
| GNL2      | 6.28157    | 6.20314    | 4.90658    | 5.2808    | 6.13935   | 6.23836     |
| GNL3      | 6.26599    | 6.21463    | 4.83676    | 5.42255   | 6.27541   | 6.58589     |
| GNL3L     | 4.67867    | 4.70331    | 3.15188    | 3.5278    | 4.07185   | 3.96217     |
| GNL3LP1   | -0.0426708 | -0.284704  | 0.828071   | 0.961534  | -0.280315 | -0.144817   |
| GNPAT     | 4.35007    | 4.27777    | 4.36625    | 4.67498   | 4.74749   | 5.36875     |
| GNPDA1    | 4.97644    | 4.93429    | 4.01982    | 4.28027   | 4.68066   | 4.95683     |
| GNPDA2    | 3.82741    | 3.90128    | 3.60438    | 3.86306   | 4.23222   | 4.4005      |
| GNPNAT1   | 4.75108    | 4.9678     | 3.44911    | 3.86269   | 5.13335   | 5.4966      |
| GNPTAB    | 5.81218    | 5.95077    | 4.81788    | 4.85911   | 5.43046   | 6.00838     |
| GNPTG     | 3.07194    | 2.9326     | 3.43102    | 3.60387   | 3.09117   | 3.18785     |
| GNRH1     | 1.95558    | 2.1482     | 0.976408   | 0.845438  | 1.36764   | 0.615294    |
| GNRHR     | -1.52875   | -0.604659  | -0.455418  | -0.177939 | 1.50965   | 1.54125     |
| GNS       | 7.65534    | 7.59488    | 7.06463    | 7.37638   | 7.14499   | 7.18539     |
| GOLGA1    | 3.33029    | 3.25623    | 3.24384    | 3.38406   | 4.05068   | 4.11147     |
| GOLGA2    | 4.60354    | 4.51394    | 4.50472    | 4.90309   | 4.92088   | 4.54831     |
| GOLGA2P10 | 2.17873    | 1.78578    | 2.24326    | 1.98306   | 1.32889   | -0.00923969 |
| GOLGA2P5  | 0.569909   | 0.552702   | 0.425685   | 0.576783  | 2.02171   | 1.02136     |

|           |           |           |           |           |           |            |
|-----------|-----------|-----------|-----------|-----------|-----------|------------|
| GOLGA2P7  | 4.78036   | 4.73282   | 5.49342   | 5.30759   | 4.705     | 3.72595    |
| GOLGA3    | 6.2622    | 6.25227   | 5.89364   | 6.24544   | 6.71177   | 6.39719    |
| GOLGA4    | 7.88796   | 7.86885   | 6.87557   | 7.24348   | 7.75059   | 7.60868    |
| GOLGA5    | 4.17513   | 4.33724   | 3.55288   | 4.001     | 4.263     | 4.77407    |
| GOLGA6L10 | 1.03005   | 1.07469   | 0.265557  | 0.462199  | -3.07319  | -3.74558   |
| GOLGA6L4  | 0.0548901 | 0.422621  | 2.83206   | 2.46858   | 0.654436  | -0.0964634 |
| GOLGA6L5P | -2.26866  | -1.99954  | 2.92227   | 2.93789   | 1.13206   | -0.444614  |
| GOLGA6L9  | 3.52549   | 3.29662   | 4.19838   | 3.77485   | 3.32217   | 2.02871    |
| GOLGA7    | 4.52492   | 4.52583   | 3.89062   | 4.34752   | 4.45409   | 4.75374    |
| GOLGA7B   | 2.53694   | 3.32662   | -4.59508  | -2.30078  | -4.07293  | -4.11926   |
| GOLGA8A   | 4.79145   | 4.51046   | 1.59519   | 1.08828   | 3.56256   | 2.15611    |
| GOLGA8B   | 5.38249   | 5.23515   | 5.33644   | 5.08823   | 5.39615   | 4.20722    |
| GOLGA8N   | -0.597516 | -0.74946  | 1.98925   | 1.7721    | -0.761695 | -1.42354   |
| GOLGB1    | 6.66394   | 6.70699   | 7.2318    | 7.53292   | 6.80797   | 6.96305    |
| GOLIM4    | 5.16897   | 5.35733   | 5.38443   | 5.61951   | 5.65848   | 5.52389    |
| GOLM1     | 6.61757   | 6.59568   | 4.82349   | 5.23768   | 5.09748   | 5.15047    |
| GOLPH3    | 4.64631   | 4.54628   | 4.4431    | 4.8256    | 5.67201   | 5.58618    |
| GOLPH3L   | 3.52492   | 3.51301   | 3.22375   | 3.46672   | 3.86521   | 4.13877    |
| GOLT1B    | 5.0335    | 5.24924   | 4.8228    | 5.44142   | 4.69448   | 5.18961    |
| GON4L     | 6.05246   | 5.99681   | 5.59719   | 5.71557   | 5.95857   | 5.57657    |
| GOPC      | 4.51232   | 4.52826   | 4.87888   | 5.14744   | 5.49569   | 5.63378    |
| GORAB     | 4.22572   | 4.20516   | 2.83329   | 3.15796   | 3.47155   | 3.66615    |
| GORASP1   | 4.14945   | 4.02699   | 3.8499    | 4.22209   | 3.77847   | 3.882      |
| GORASP2   | 4.78019   | 4.66321   | 4.71959   | 5.0371    | 4.80625   | 4.84979    |
| GOSR1     | 4.16913   | 4.31805   | 4.47557   | 4.80779   | 4.94664   | 5.01932    |
| GOSR2     | 4.90351   | 4.81703   | 4.42176   | 4.86667   | 5.17129   | 5.2986     |
| GOT1      | 3.81266   | 3.67414   | 4.34199   | 4.95118   | 4.4926    | 4.6596     |
| GOT2      | 5.48515   | 5.50004   | 5.65212   | 6.05041   | 6.67115   | 6.96239    |
| GOT2P2    | 0.0559314 | -0.440295 | -0.375995 | 0.139221  | 0.886652  | 1.02127    |
| GOT2P3    | 0.171937  | 0.013012  | -0.568612 | -0.086319 | 0.427241  | 0.443129   |
| GPAA1     | 4.37973   | 4.1891    | 4.36625   | 4.5287    | 4.46639   | 4.86218    |
| GPALPP1   | 3.6138    | 3.67414   | 4.28815   | 4.45437   | 3.73736   | 3.90246    |
| GPAM      | 4.39763   | 4.22277   | 3.98765   | 4.17657   | 4.25107   | 4.44557    |
| GPANK1    | 3.34503   | 3.37012   | 2.6854    | 3.04759   | 2.96722   | 3.50703    |
| GPATCH1   | 3.01001   | 2.82948   | 3.06678   | 3.34445   | 3.07101   | 2.65962    |
| GPATCH11  | 4.31139   | 4.3011    | 3.47649   | 3.83791   | 4.58337   | 4.78104    |
| GPATCH2   | 4.38175   | 4.60459   | 4.23432   | 4.50219   | 4.86618   | 4.83147    |
| GPATCH2L  | 6.04112   | 6.02974   | 5.30832   | 5.43999   | 6.03728   | 5.75014    |
| GPATCH3   | 2.80257   | 2.76598   | 1.68022   | 2.01471   | 2.41117   | 2.41742    |
| GPATCH4   | 5.44374   | 5.50259   | 4.00908   | 4.43451   | 5.64711   | 5.26007    |
| GPATCH8   | 5.00569   | 4.94123   | 5.39531   | 5.25585   | 5.19027   | 4.91625    |
| GPBP1     | 5.36127   | 5.42133   | 5.78585   | 6.01529   | 5.77327   | 5.97275    |
| GPBP1L1   | 5.95848   | 5.94656   | 6.26565   | 6.43858   | 6.32392   | 6.13411    |
| GPC1      | 5.21492   | 5.16285   | 5.71695   | 5.74682   | 4.91002   | 5.02459    |
| GPC4      | -4.69535  | -6.45019  | 2.58467   | 1.81601   | 6.51647   | 5.70743    |
| GPC6      | 5.5881    | 5.26326   | -1.42826  | -1.64896  | 5.45922   | 5.90294    |
| GPCPD1    | 4.12772   | 4.00319   | 5.76105   | 5.53562   | 4.59076   | 4.54155    |
| GPD1L     | 4.12429   | 4.20068   | 2.87987   | 3.16963   | 5.04226   | 5.27552    |
| GPD2      | 6.47582   | 6.32893   | 6.01389   | 6.37311   | 6.68462   | 6.87487    |
| GPER1     | 0.0559314 | -0.46266  | -1.13883  | -0.899117 | 1.46385   | 1.0747     |
| GPHN      | 3.44302   | 3.45453   | 0.225978  | -0.108685 | 2.3292    | 2.26485    |
| GPI       | 6.69294   | 6.77525   | 7.79471   | 8.11169   | 8.13413   | 7.64547    |

|         |          |          |           |            |            |           |
|---------|----------|----------|-----------|------------|------------|-----------|
| GPKOW   | 3.70179  | 3.5692   | 3.13841   | 3.5689     | 2.66388    | 2.61523   |
| GPM6A   | -1.30642 | -1.105   | -3.37468  | -2.93781   | 7.14472    | 7.36171   |
| GPM6B   | 5.32292  | 4.77792  | 0.102     | -0.131402  | 6.17338    | 6.01096   |
| GPN1    | 4.36833  | 4.4458   | 3.34251   | 3.82589    | 5.5052     | 6.35415   |
| GPN2    | 4.44493  | 4.42056  | 3.56635   | 3.92871    | 4.83153    | 4.64311   |
| GPN3    | 3.55623  | 3.55198  | 2.74893   | 3.13274    | 3.12353    | 3.75687   |
| GPNMB   | 1.12752  | 0.491443 | 4.18716   | 4.98193    | 4.25183    | 4.7619    |
| GPR1    | -4.69535 | -6.45019 | -1.53926  | -0.751045  | 1.12765    | 1.51249   |
| GPR107  | 5.48299  | 5.56469  | 5.53327   | 5.88622    | 5.56277    | 5.80848   |
| GPR108  | 3.53334  | 3.30037  | 3.32428   | 3.72722    | 3.84946    | 4.06807   |
| GPR132  | 5.54406  | 5.45375  | -5.1783   | -4.52056   | -2.75246   | -4.70296  |
| GPR135  | 2.65216  | 2.84882  | 2.84369   | 2.68368    | 2.61901    | 2.38986   |
| GPR137  | 3.29891  | 3.24583  | 2.42245   | 2.75471    | 2.41111    | 2.1394    |
| GPR137B | 2.44048  | 2.55119  | 1.5714    | 1.92462    | 1.82353    | 2.42773   |
| GPR137C | 2.46584  | 2.67159  | 1.78805   | 1.76157    | 1.41655    | 1.53173   |
| GPR153  | 2.04241  | 1.52587  | 1.68069   | 1.6394     | 0.568596   | -0.121607 |
| GPR155  | 3.91746  | 3.78862  | 2.21737   | 2.03585    | 3.36482    | 2.46822   |
| GPR156  | 0.973406 | 1.045    | -0.252626 | 0.158078   | 0.932205   | 0.315752  |
| GPR157  | 2.24345  | 2.17742  | 2.40145   | 2.67254    | 2.95624    | 2.66181   |
| GPR158  | 3.53557  | 3.4524   | -1.37581  | -1.15432   | 0.0263185  | -0.151977 |
| GPR160  | 0.375735 | 0.775632 | 0.102     | 0.120113   | 1.19772    | 0.380851  |
| GPR161  | 5.0537   | 5.06611  | 4.62463   | 4.89188    | 4.35928    | 4.33357   |
| GPR162  | 0.800836 | 0.645757 | 1.3479    | 1.40691    | 2.18833    | 2.16989   |
| GPR173  | 1.7314   | 2.01291  | 2.27592   | 1.94648    | 1.04018    | 1.12623   |
| GPR176  | 5.7232   | 5.82543  | 3.98639   | 4.93076    | 3.84551    | 4.2975    |
| GPR18   | 1.18361  | 1.08411  | 1.13846   | 0.935633   | 0.351018   | -0.38461  |
| GPR180  | 5.24708  | 5.27059  | 4.40237   | 4.5724     | 5.09749    | 5.17592   |
| GPR183  | 0.701877 | 0.479758 | 1.23438   | 1.12005    | 0.234612   | -0.421131 |
| GPR22   | 2.13699  | 2.20606  | 1.8772    | 1.81601    | 1.07446    | 0.816919  |
| GPR3    | 2.18663  | 2.31525  | -0.482896 | -0.301307  | 0.679613   | 0.965773  |
| GPR37   | 3.58747  | 2.96761  | 1.81651   | 1.96801 ?  | ?          |           |
| GPR39   | 3.25017  | 3.31333  | 2.78258   | 3.56643    | 3.5211     | 4.00718   |
| GPR52   | 0.54893  | 0.756391 | 0.225978  | -0.0212303 | -0.572647  | -1.12145  |
| GPR55   | -0.13626 | 0.414038 | 0.445928  | 1.06287    | -6.64581 ? |           |
| GPR63   | 1.91933  | 1.84552  | 1.30034   | 1.24877    | -4.33548   | -5.69922  |
| GPR75   | 1.68033  | 1.46793  | 0.966283  | 0.685662   | 1.34536    | 0.0483059 |
| GPR89A  | 3.74346  | 3.65228  | 4.04681   | 4.15458    | 3.59695    | 3.96797   |
| GPR89B  | 3.44097  | 3.49415  | 3.46347   | 3.49829    | 3.22403    | 3.38794   |
| GPRASP1 | 1.87838  | 2.0802   | 2.92501   | 2.49587    | 2.25857    | 1.67702   |
| GPRASP2 | 1.01876  | 1.15181  | 2.99802   | 3.10342    | 3.26133    | 3.41998   |
| GPRC5A  | 7.07187  | 7.19027  | 4.38727   | 4.92665    | 2.21315    | 1.62424   |
| GPRC5B  | 4.59617  | 4.63305  | 3.43863   | 4.00168    | 3.7743     | 3.82613   |
| GPRIN1  | 3.14141  | 3.13284  | 3.5675    | 3.78729    | 3.5006     | 3.54122   |
| GPRIN3  | 1.70183  | 1.72701  | 2.2002    | 2.7398     | -4.33548   | -2.8983   |
| GPS1    | 5.7244   | 5.50691  | 4.85245   | 5.01951    | 6.13588    | 6.071     |
| GPS2    | 3.77062  | 3.83145  | 4.18406   | 4.50338    | 5.02353    | 4.94428   |
| GPS2P1  | 0.34334  | 0.545781 | 0.471187  | 1.14912    | 1.52997    | 1.87123   |
| GPSM1   | 2.80394  | 2.39986  | 3.24419   | 3.15505    | 1.85498    | 1.65831   |
| GPSM2   | 6.24062  | 6.46323  | 4.75798   | 4.74915    | 5.35873    | 5.15524   |
| GPSM3   | -1.41331 | -1.87737 | 1.90397   | 2.03585    | -1.30241   | -1.12145  |
| GPT2    | 3.6047   | 3.48112  | 4.02836   | 4.3465     | 5.00681    | 4.58904   |
| GPX1    | 4.48956  | 4.50366  | 2.74808   | 3.38261    | 5.0179     | 6.30627   |



|              |           |            |            |            |           |            |
|--------------|-----------|------------|------------|------------|-----------|------------|
| GPX1P1       | 1.56267   | 1.60845    | -0.0600558 | 0.269895   | 1.92424   | 3.29627    |
| GPX3         | 0.121214  | -0.0533185 | 3.89328    | 4.04977    | -0.615709 | -1.31405   |
| GPX4         | 4.44367   | 4.09652    | 3.98138    | 4.3258     | 5.32089   | 5.7069     |
| GPX7         | 3.07406   | 2.64045    | 1.30838    | 0.946514 ? | ?         |            |
| GPX8         | 3.77055   | 3.76836    | 5.52468    | 5.99149    | 4.88513   | 5.62923    |
| GRAMD1A      | 3.06081   | 2.68945    | 3.60926    | 3.69853    | 3.98083   | 3.64423    |
| GRAMD1C      | 0.459064  | 1.32336    | 1.42907    | 1.85456    | -0.285108 | 0.752791   |
| GRAMD3       | 3.91311   | 3.51168    | 2.74154    | 3.14359    | 4.43554   | 4.73475    |
| GRAMD4       | 3.42763   | 3.26848    | 2.83608    | 2.85407    | 1.72343   | 1.78517    |
| GRB10        | 6.10283   | 6.33986    | 3.46933    | 4.05858    | 7.23257   | 7.19772    |
| GRB2         | 5.07613   | 5.19581    | 5.14905    | 5.6473     | 6.50939   | 6.83851    |
| GREB1        | 2.78676   | 2.76598    | 1.99641    | 1.92462    | -3.19956  | -3.38329   |
| GREB1L       | 0.62293   | 0.746683   | 1.92503    | 1.47617    | 0.405873  | 0.315752   |
| GREM2        | 1.03569   | 0.920918   | 0.871828   | -0.938639  | -0.959604 | -1.38442   |
| GRHL1        | 2.37508   | 1.90787    | -0.138983  | -0.493926  | 1.14064   | -0.280287  |
| GRHPR        | 4.46648   | 4.39122    | 4.73123    | 5.02236    | 5.7098    | 5.85679    |
| GRIK2        | 5.13733   | 4.94707    | -2.18288   | -1.52346   | 4.56428   | 4.48927    |
| GRIK4        | ?         | -6.45019   | 2.27592    | 2.42257    | -0.572647 | -0.247123  |
| GRIN2A       | 0.752201  | 0.076436   | 1.59787    | 0.711424   | -1.26766  | -1.38442   |
| GRIN3A       | 0.41996   | 0.479758   | 0.488988   | 0.605504   | 0.293994  | -0.0627204 |
| GRINA        | 4.72665   | 4.49569    | 5.27948    | 5.51276    | 5.28403   | 5.03812    |
| GRIP1        | 1.77482   | 1.59526    | -4.16641   | -3.10759   | 0.0211243 | -0.0887103 |
| GRIP2        | -0.94121  | -1.13776   | 2.13935    | 2.37633    | 0.213378  | -1.18215   |
| GRIPAP1      | 4.44811   | 4.36608    | 3.98264    | 4.04345    | 3.33969   | 3.08771    |
| GRK4         | 1.07577   | 1.02102    | 0.208904   | 0.334214   | 1.28225   | 1.1637     |
| GRK5         | 2.26672   | 2.62992    | 2.93542    | 3.03838    | 1.13416   | 1.0747     |
| GRK6         | 3.36121   | 3.20204    | 3.8859     | 4.08506    | 4.55037   | 4.4816     |
| GRK6P1       | -0.359059 | -0.43467   | 0.0930733  | 0.261134   | 0.628186  | 0.200291   |
| GRM8         | 3.89329   | 3.71825    | -4.18092   | -3.78492   | -3.6585   | -5.69922   |
| GRN          | 5.07735   | 4.82717    | 5.93477    | 6.04757    | 4.82852   | 4.79909    |
| GRPEL1       | 4.38306   | 4.26421    | 4.13388    | 4.53682    | 5.21234   | 4.97187    |
| GRPEL2       | 4.63233   | 4.47195    | 4.18747    | 4.29228    | 5.36282   | 5.05641    |
| GRSF1        | 5.83813   | 5.98397    | 4.70521    | 5.13671    | 6.29806   | 6.55948    |
| GRWD1        | 4.69102   | 4.55743    | 3.93929    | 4.20516    | 5.18791   | 5.56878    |
| GS1-124K5.11 | 1.52013   | 1.64571    | 2.32429    | 2.32164    | 2.0332    | 1.04823    |
| GS1-124K5.12 | 0.278306  | 0.338955   | 0.473506   | 0.491176   | 0.529601  | 0.363799   |
| GS1-257G1.1  | 1.04207   | 0.782467   | 1.49592    | 1.38027    | 1.87216   | 1.69998    |
| GS1-309P15.4 | 1.15061   | 1.23949    | 1.38307    | 1.35826    | 2.11114   | 1.39602    |
| GS1-358P8.4  | 2.39633   | 2.35095    | 4.0477     | 4.15091    | 3.5528    | 3.00754    |
| GS1-44D20.1  | 3.2123    | 3.27496    | 3.49308    | 3.88538    | 4.4649    | 4.46157    |
| GSAP         | 2.47585   | 2.79455    | 2.41268    | 2.8827     | 2.80934   | 3.44049    |
| GSDMB        | 0.480917  | 0.0291348  | 2.09262    | 2.16732    | -0.217212 | -1.006     |
| GSDMD        | 1.28965   | 1.15925    | 4.0247     | 4.25859    | 3.19144   | 3.60617    |
| GSE1         | 3.93119   | 3.85344    | 4.85538    | 4.85838    | 4.63832   | 4.33904    |
| GSG2         | 3.12747   | 3.14449    | 2.96623    | 3.40885    | 3.15508   | 3.03476    |
| GSK3A        | 3.53217   | 3.38518    | 2.38501    | 2.77939    | 3.82347   | 3.9311     |
| GSK3B        | 5.01515   | 5.07437    | 5.07975    | 5.20292    | 4.94097   | 5.17973    |
| GSKIP        | 3.32382   | 3.38134    | 2.44584    | 2.74917    | 3.46897   | 4.28622    |
| GSN          | 5.82387   | 5.89939    | 4.81143    | 5.08344    | 4.19939   | 4.50752    |
| GSN-AS1      | 2.64912   | 2.83109    | 2.26639    | 2.28436    | 1.21231   | 0.789971   |
| GSPT1        | 6.23072   | 6.08645    | 6.38015    | 6.6639     | 6.75146   | 6.41804    |
| GSPT2        | 3.10182   | 3.18821    | 2.4164     | 2.70175    | 2.79091   | 2.73209    |

|            |           |           |             |            |          |          |
|------------|-----------|-----------|-------------|------------|----------|----------|
| GSR        | 5.33263   | 5.46161   | 6.32376     | 6.73311    | 5.76513  | 5.86122  |
| GSS        | 4.80424   | 4.63976   | 4.38822     | 4.68395    | 4.33757  | 4.70479  |
| GSTA4      | 0.930336  | 0.727049  | -2.37543    | -1.71605   | 2.52953  | 3.55303  |
| GSTCD      | 3.98281   | 4.26834   | 3.33891     | 3.70403    | 3.49424  | 3.94134  |
| GSTK1      | 4.33709   | 4.42817   | 4.74498     | 5.03582    | 5.36343  | 5.7274   |
| GSTM2      | -0.151452 | -0.493896 | 1.90783     | 1.91503    | 2.04766  | 1.80543  |
| GSTM3      | 3.5429    | 3.34934   | 4.75678     | 5.23577    | 5.30502  | 5.57724  |
| GSTM4      | 2.20716   | 2.08267   | 1.88491     | 2.43664    | 2.8188   | 3.01212  |
| GSTO1      | 3.65957   | 3.68436   | 4.27592     | 4.80031    | 4.50018  | 5.78712  |
| GSTP1      | 6.68485   | 6.57949   | 6.61411     | 6.81747    | 5.22462  | 5.61801  |
| GSTT2B     | 2.37121   | 2.48158   | -1.44476    | -1.54198   | 1.48802  | 2.07667  |
| GSTZ1      | 2.38042   | 1.81795   | 2.19587     | 1.8454     | 2.42451  | 1.81687  |
| GTDC1      | 3.87991   | 3.93696   | 1.7234      | 1.70499    | 4.4469   | 4.62978  |
| GTF2A1     | 5.06172   | 5.21442   | 4.3939      | 4.67692    | 5.22919  | 4.98357  |
| GTF2A2     | 4.03731   | 3.95289   | 3.37298     | 3.63095    | 4.48816  | 4.73829  |
| GTF2B      | 3.93027   | 3.87477   | 3.37298     | 3.75071    | 3.79604  | 4.62419  |
| GTF2E1     | 3.19574   | 3.18821   | 3.43853     | 3.86013    | 3.65597  | 3.54358  |
| GTF2E2     | 3.57004   | 3.60054   | 3.42935     | 3.75999    | 3.6389   | 3.8932   |
| GTF2F1     | 4.96492   | 4.93964   | 4.60926     | 4.98525    | 5.78705  | 5.66668  |
| GTF2F2     | 3.84492   | 3.94123   | 3.44766     | 4.02174    | 4.91947  | 5.51002  |
| GTF2H1     | 5.03726   | 5.11082   | 4.20017     | 4.59594    | 5.28722  | 5.74448  |
| GTF2H2     | 3.73593   | 3.79013   | 4.11228     | 4.18501    | 4.22836  | 4.04536  |
| GTF2H2B    | 2.68065   | 2.69981   | 2.78619     | 3.22233    | 2.92908  | 3.14889  |
| GTF2H2C    | 4.27644   | 4.36505   | 4.42902     | 4.50809    | 5.22899  | 5.57703  |
| GTF2H3     | 4.50853   | 4.52937   | 3.8221      | 4.24872    | 4.50143  | 4.67483  |
| GTF2H4     | 2.37064   | 2.11689   | 2.32339     | 2.2865     | 2.6895   | 2.52341  |
| GTF2H5     | 3.21381   | 3.22541   | 1.90396     | 2.16732    | 3.98894  | 5.02799  |
| GTF2I      | 6.60077   | 6.53277   | 7.02126     | 7.00119    | 7.00002  | 6.89473  |
| GTF2IP1    | 5.56918   | 5.28367   | 5.36648     | 5.44034    | 5.31395  | 4.89943  |
| GTF2IP4    | 5.95973   | 5.39154   | 5.1693      | 5.17852    | 5.30313  | 4.86616  |
| GTF2IRD1   | 2.79678   | 2.55397   | 3.89996     | 3.97198    | 3.52332  | 3.39657  |
| GTF2IRD2   | 1.28437   | 1.10298   | 1.84014     | 1.43359    | 2.74924  | 2.07758  |
| GTF2IRD2B  | 1.32335   | 0.936938  | 1.9711      | 1.92856    | 2.73352  | 2.37376  |
| GTF3A      | 4.98462   | 4.9422    | 4.46297     | 4.79735    | 5.17924  | 5.51229  |
| GTF3C1     | 6.50058   | 6.40983   | 6.73738     | 6.82153    | 6.08976  | 5.65741  |
| GTF3C2     | 5.21994   | 5.09554   | 4.1247      | 4.3996     | 5.35108  | 5.27605  |
| GTF3C2-AS1 | 0.558875  | 0.679919  | -0.00412623 | 0.00626211 | 0.824857 | 0.301236 |
| GTF3C3     | 4.47851   | 4.47954   | 4.30311     | 4.40786    | 4.72278  | 5.18656  |
| GTF3C4     | 5.59174   | 5.66662   | 4.92869     | 5.19569    | 5.44187  | 5.47581  |
| GTF3C5     | 4.52431   | 4.40056   | 4.07386     | 4.33307    | 4.33615  | 4.19867  |
| GTF3C6     | 3.71404   | 3.87838   | 2.2841      | 3.01207    | 4.87567  | 5.50658  |
| GTPBP1     | 4.46541   | 4.35475   | 4.42747     | 4.5796     | 4.00903  | 3.49694  |
| GTPBP10    | 3.68348   | 3.9054    | 4.0252      | 4.33928    | 4.03916  | 4.38964  |
| GTPBP2     | 4.75676   | 4.63519   | 4.17073     | 4.52598    | 5.28658  | 5.082    |
| GTPBP3     | 2.33986   | 2.08407   | 2.16964     | 2.17196    | 2.26452  | 1.97279  |
| GTPBP4     | 5.94447   | 6.12931   | 4.20303     | 4.73753    | 5.86366  | 5.91115  |
| GTPBP6     | 1.93757   | 1.71211   | 2.60439     | 2.9052     | 1.27048  | 1.81687  |
| GTPBP8     | 2.38009   | 2.58599   | 2.11526     | 2.4021     | 2.70329  | 3.2531   |
| GTSE1      | 4.8555    | 4.79748   | 4.75605     | 5.00034    | 3.94886  | 3.86693  |
| GUCD1      | 5.86266   | 5.69997   | 5.56179     | 6.07071    | 5.22676  | 5.27139  |
| GUCY1A2    | -2.79121  | -3.13966  | -0.428455   | 0.213217   | 4.15346  | 4.63646  |
| GUCY1B3    | -6.68418  | -6.45019  | -3.59683    | -4.10635   | 1.58765  | 1.60621  |

|         |          |            |          |            |          |           |
|---------|----------|------------|----------|------------|----------|-----------|
| GUF1    | 4.15188  | 4.05481    | 3.60438  | 3.77381    | 4.66948  | 4.51366   |
| GUK1    | 4.32882  | 4.24709    | 4.76264  | 5.20178    | 5.56127  | 6.38901   |
| GULP1   | 5.18775  | 5.32953    | 2.57138  | 2.22658    | 6.20598  | 6.35296   |
| GUSB    | 4.96355  | 4.85562    | 4.92956  | 4.93758    | 4.33191  | 3.71534   |
| GUSBP1  | 2.06307  | 2.02539    | 2.20224  | 2.11803    | 1.93073  | 1.75588   |
| GUSBP11 | 2.20418  | 1.99001    | 2.88692  | 2.41521    | 1.12228  | 1.08031   |
| GUSBP3  | 0.17218  | 0.414146   | 1.35838  | 0.973435   | 1.16964  | 0.278603  |
| GUSBP9  | 1.6526   | 1.29415    | 1.98684  | 1.59878    | 1.28202  | 1.35997   |
| GVINP1  | 0.595618 | 0.697098   | 1.18285  | 1.12005 ?  | ?        |           |
| GVQW1   | 0.647075 | 0.494538   | 0.863114 | 0.693186   | 1.05892  | -0.543078 |
| GXYLT1  | 5.82912  | 5.91949    | 5.05546  | 5.15091    | 4.76752  | 4.96747   |
| GXYLT2  | 4.43341  | 4.30616    | 4.22374  | 4.03965    | 4.63831  | 4.16519   |
| GYG1    | 3.29244  | 3.53008    | 3.59784  | 4.26837    | 3.93214  | 4.5624    |
| GYG2    | ? ?      |            | 2.23435  | 1.81006    | -2.26731 | -4.11926  |
| GYPC    | 1.75628  | 1.50874    | 3.52038  | 3.75536    | -6.64581 | -4.70296  |
| GYS1    | 3.63297  | 3.43197    | 4.1248   | 4.21197    | 4.88804  | 4.10867   |
| GZF1    | 4.82152  | 4.80627    | 4.76775  | 4.86844    | 4.15427  | 4.0515    |
| H1F0    | 5.01043  | 4.66256    | 6.08091  | 6.14294    | 3.62624  | 2.83633   |
| H1FX    | 2.96813  | 2.50415    | 3.46634  | 3.56506    | 2.02892  | 2.34214   |
| H2AFJ   | 1.14646  | 0.357428 ? |          | -6.09892   | 0.839605 | 0.769095  |
| H2AFV   | 5.85969  | 5.94028    | 5.93043  | 6.21057    | 5.87359  | 5.91273   |
| H2AFX   | 4.23606  | 3.99246    | 4.0656   | 4.10305    | 4.29023  | 4.28621   |
| H2AFY   | 6.97113  | 7.08924    | 7.30515  | 7.48288    | 6.84831  | 6.678     |
| H2AFZ   | 7.38734  | 7.43903    | 6.9374   | 7.45031    | 7.57473  | 8.28434   |
| H2AFZP3 | 1.88804  | 2.04198    | 1.41445  | 1.87719    | 2.08691  | 2.92444   |
| H2BFS   | 1.05846  | 0.924624   | -1.91141 | -1.49178   | 0.154531 | 0.982269  |
| H3F3A   | 5.83579  | 5.67948    | 5.58206  | 5.5487     | 6.44838  | 6.36412   |
| H3F3AP4 | 5.20546  | 4.89807    | 4.65898  | 4.77615    | 5.74458  | 6.17661   |
| H3F3B   | 8.21181  | 8.10461    | 7.44015  | 7.64758    | 8.65413  | 8.72191   |
| H3F3C   | 2.67512  | 2.59687    | 1.51123  | 1.87731    | 3.06088  | 2.89116   |
| H6PD    | 4.47521  | 4.05185    | 5.5182   | 5.38301    | 3.66161  | 3.42257   |
| HABP4   | 2.86239  | 2.93482    | 2.27017  | 2.69352    | 2.72504  | 2.94437   |
| HACD1   | 2.5441   | 2.31525    | 3.04289  | 3.48364    | -0.10558 | 0.422664  |
| HACD2   | 4.71401  | 4.75752    | 4.38348  | 4.94916    | 6.01497  | 6.50789   |
| HACD3   | 6.6328   | 6.56039    | 6.87427  | 7.01057    | 6.78081  | 6.73361   |
| HACD4   | 1.82842  | 2.08021    | 1.60441  | 1.36695    | 2.20389  | 1.84021   |
| HACE1   | 3.12588  | 3.18101    | 3.63666  | 3.5968     | 3.40039  | 3.21215   |
| HACL1   | 3.99186  | 4.01874    | 2.50907  | 2.70289    | 3.55685  | 4.21569   |
| HADH    | 3.43918  | 3.34932    | 3.39955  | 3.62926    | 2.27928  | 2.90062   |
| HADHA   | 6.4628   | 6.45957    | 5.85005  | 6.27163    | 5.99335  | 6.27532   |
| HADHAP1 | 1.26884  | 1.48209    | 1.25302  | 1.50243    | 1.04321  | 1.06652   |
| HADHB   | 5.22757  | 5.3364     | 4.73978  | 5.11275    | 5.2135   | 5.58502   |
| HAGH    | 3.05079  | 2.97387    | 2.66511  | 3.0933     | 2.80947  | 2.74862   |
| HAGHL   | 1.52275  | 1.11725    | 0.948534 | 1.04437    | 1.06223  | 1.99059   |
| HAGLR   | 3.05329  | 2.83754    | 1.76404  | 1.8028     | 2.34806  | 2.43204   |
| HAND2   | 2.81821  | 2.75805    | -3.85951 | -13.2477   | -4.65668 | -5.69922  |
| HAPLN1  | 5.91952  | 5.27819    | -4.18092 | -3.52222   | -5.65305 | -4.11926  |
| HAPLN3  | 2.82252  | 3.00068    | 0.371169 | 0.857026 ? |          | -3.38329  |
| HARBII  | 1.09102  | 1.0306     | 1.05664  | 1.23164    | 1.52158  | 1.66267   |
| HARS    | 5.85401  | 5.85274    | 5.67902  | 5.94085    | 6.40654  | 6.3708    |
| HARS2   | 4.69043  | 4.80573    | 4.79821  | 5.08706    | 4.92673  | 5.33166   |
| HAS2    | 2.95222  | 3.21541    | 0.636673 | -0.630687  | 2.52286  | 1.99746   |

|         |           |            |           |           |           |           |
|---------|-----------|------------|-----------|-----------|-----------|-----------|
| HAS3    | 2.24052   | 1.85459    | 0.996447  | 0.82198   | 3.18047   | 2.81686   |
| HAT1    | 5.57502   | 5.5747     | 4.93607   | 5.33153   | 5.75198   | 6.47136   |
| HAUS1   | 3.47584   | 3.56203    | 2.80775   | 3.22433   | 2.31412   | 3.42741   |
| HAUS2   | 3.89989   | 4.0139     | 3.26563   | 3.88411   | 4.21466   | 4.42256   |
| HAUS3   | 4.04996   | 4.1633     | 3.6798    | 3.8809    | 3.92066   | 4.00327   |
| HAUS4   | 3.24927   | 2.99929    | 2.14942   | 2.32223   | 2.54013   | 3.04619   |
| HAUS5   | 2.69754   | 2.70207    | 3.16742   | 3.29844   | 2.73202   | 2.55069   |
| HAUS6   | 6.03293   | 5.93961    | 5.02726   | 5.10606   | 6.48291   | 6.46435   |
| HAUS6P1 | 3.20003   | 3.17718    | 2.18294   | 2.44296   | 3.67747   | 3.98781   |
| HAUS6P3 | -0.161889 | 0.0155689  | -0.63627  | -0.414047 | 0.73914   | 0.496708  |
| HAUS7   | 2.41467   | 2.12586    | 2.55793   | 2.64948   | 2.73625   | 2.86315   |
| HAUS8   | 2.66287   | 2.6587     | 2.38255   | 2.74916   | 2.92278   | 2.65085   |
| HAX1    | 5.24281   | 5.25484    | 4.56613   | 5.06395   | 5.24534   | 5.92242   |
| HBEGF   | 2.69539   | 2.8881     | 2.68067   | 2.98129   | 3.52457   | 2.25909   |
| HBP1    | 4.94304   | 4.99594    | 4.70276   | 5.01022   | 4.5081    | 4.94809   |
| HBS1L   | 4.93481   | 5.04692    | 4.98451   | 5.15208   | 5.99856   | 6.44207   |
| HCCS    | 2.47835   | 1.67161    | 2.66198   | 2.24434   | 3.55523   | 2.84404   |
| HCFC1   | 5.11791   | 4.77552    | 4.96049   | 4.69771   | 5.15868   | 5.20541   |
| HCFC1R1 | 2.88472   | 2.80037    | 3.13443   | 3.5835    | 3.72604   | 4.0644    |
| HCFC2   | 3.27677   | 3.35094    | 3.33021   | 3.47425   | 3.58286   | 3.93714   |
| HCG18   | 4.79752   | 4.8658     | 4.957     | 5.04461   | 5.52252   | 5.43224   |
| HCG4P5  | 0.514723  | 0.642443   | 2.48338   | 2.9417    | 2.2814    | 2.936     |
| HCN2    | -1.14812  | -2.22414   | 1.78471   | 0.987517  | 1.75907   | 0.307953  |
| HCN3    | 1.37778   | 1.18826    | 1.62387   | 1.46864   | 1.08794   | 0.315752  |
| HCP5    | -0.132739 | -0.970721  | -2.5977   | -1.86039  | 1.2881    | 1.54125   |
| HDAC1   | 5.80076   | 5.57332    | 5.62664   | 5.9111    | 6.28333   | 6.23873   |
| HDAC10  | 1.30441   | 0.962808   | 2.16697   | 2.26317   | 1.20807   | 1.27979   |
| HDAC11  | -1.17328  | -1.7075    | 1.72383   | 1.70499   | 0.558944  | 0.633217  |
| HDAC1P2 | -0.129081 | -0.0876659 | -0.300715 | -0.436219 | 0.82357   | 0.100762  |
| HDAC2   | 5.58023   | 5.59987    | 5.408     | 5.52326   | 6.31427   | 6.65165   |
| HDAC3   | 4.54714   | 4.46454    | 4.94704   | 5.13195   | 5.43699   | 5.42706   |
| HDAC4   | 4.08963   | 3.97282    | 3.44766   | 3.48364   | 3.26004   | 3.12618   |
| HDAC5   | 3.1211    | 2.78746    | 3.07858   | 3.4342    | 3.46768   | 3.48804   |
| HDAC6   | 3.67378   | 3.38733    | 3.8221    | 3.88127   | 3.29389   | 2.93354   |
| HDAC7   | 3.48316   | 3.24398    | 4.46802   | 4.47121   | 4.41951   | 4.16961   |
| HDAC8   | 3.59323   | 3.67287    | 3.66353   | 3.67744   | 3.65822   | 3.62421   |
| HDAC9   | 5.18927   | 5.29119    | 4.21414   | 4.34444   | 6.18516   | 6.31391   |
| HDDC2   | 3.53932   | 3.77316    | 3.03565   | 3.46671   | 4.30331   | 5.32601   |
| HDDC3   | 2.52264   | 2.57949    | 1.46354   | 1.73689   | 1.54823   | 1.835     |
| HDGF    | 8.09032   | 8.24492    | 7.03031   | 7.58226   | 7.91528   | 8.05299   |
| HDGFRP2 | 4.16974   | 3.83292    | 4.13276   | 4.24211   | 4.42715   | 4.01609   |
| HDGFRP3 | 5.42115   | 5.15605    | 5.55161   | 5.51341   | 5.11145   | 4.77508   |
| HDHD1   | 1.68033   | 1.554      | 2.13391   | 2.27489   | 2.65711   | 2.84788   |
| HDHD2   | 4.21364   | 4.26947    | 3.36091   | 3.40558   | 3.34354   | 3.39775   |
| HDHD3   | 1.6585    | 1.61934    | 0.945825  | 1.28354   | -0.852709 | -0.121607 |
| HDLBP   | 8.52296   | 8.39787    | 8.38507   | 8.76352   | 8.62258   | 8.505     |
| HDX     | 2.12749   | 2.25142    | 2.64621   | 2.69208   | 3.01388   | 3.35938   |
| HEATR1  | 6.78385   | 6.83864    | 5.92449   | 6.29217   | 7.13503   | 7.1052    |
| HEATR3  | 3.57588   | 3.6509     | 3.44766   | 3.68883   | 4.76385   | 5.18506   |
| HEATR5A | 4.48715   | 4.816      | 3.23674   | 3.73531   | 4.22692   | 4.69693   |
| HEATR5B | 5.07281   | 5.05038    | 4.3459    | 4.48456   | 5.23033   | 5.08851   |
| HEATR6  | 4.13776   | 4.34127    | 3.60111   | 3.99707   | 4.36482   | 4.40571   |

|         |           |          |          |            |            |           |
|---------|-----------|----------|----------|------------|------------|-----------|
| HEBP1   | 1.50553   | 1.06077  | 3.50073  | 3.57065    | 1.18523    | 0.847941  |
| HEBP2   | 3.29103   | 3.3429   | 3.46394  | 3.7507     | 4.47988    | 4.75168   |
| HECA    | 3.34314   | 3.33467  | 2.90313  | 3.10522    | 4.48275    | 4.21201   |
| HECTD1  | 7.09006   | 7.10625  | 6.24327  | 6.44119    | 6.96495    | 6.99481   |
| HECTD2  | 3.44558   | 3.459    | 2.8305   | 2.86846    | 4.20927    | 4.27627   |
| HECTD3  | 3.31354   | 3.10131  | 4.27999  | 4.38202    | 4.12103    | 3.87072   |
| HECTD4  | 5.40286   | 5.3147   | 5.57805  | 5.45636    | 5.10035    | 4.49388   |
| HECW1   | -0.970891 | -1.00314 | 4.12761  | 4.46641    | -1.95932   | -0.979598 |
| HECW2   | 1.49571   | 1.67674  | 2.0549   | 2.37903    | -2.48959   | -1.18284  |
| HEG1    | 5.84543   | 6.05925  | 8.15875  | 8.23864    | 6.7375     | 6.79933   |
| HEIH    | 1.24787   | 1.21186  | 0.925149 | 1.21883    | 2.12004    | 2.56107   |
| HELB    | 4.49411   | 4.63089  | 3.19793  | 3.28349    | 4.05768    | 3.90041   |
| HELLPAR | 7.20605   | 7.49078  | 3.70484  | 3.77524    | 5.80014    | 5.43991   |
| HELLS   | 6.11578   | 6.1793   | 6.39504  | 6.33381    | 5.84004    | 5.75168   |
| HELQ    | 2.68247   | 2.71956  | 2.39014  | 2.58815    | 2.56612    | 2.78514   |
| HELZ    | 5.85936   | 5.68595  | 6.01521  | 5.82853    | 6.51362    | 6.01182   |
| HELZ2   | 3.07736   | 2.96342  | 3.69146  | 3.62757    | 4.75807    | 4.99458   |
| HEMK1   | 3.74697   | 3.71458  | 3.91714  | 3.99314    | 3.44298    | 3.38074   |
| HERC1   | 6.56196   | 6.57461  | 6.7236   | 6.8383     | 6.76908    | 6.51999   |
| HERC2   | 6.33535   | 6.26261  | 6.34416  | 6.41825    | 6.15977    | 5.75208   |
| HERC2P2 | 5.78513   | 5.63698  | 6.21703  | 6.27276    | 5.50856    | 4.49315   |
| HERC2P3 | 4.19449   | 4.03995  | 2.97984  | 3.07768    | 2.22247    | 1.31188   |
| HERC2P9 | 4.50287   | 4.36196  | 4.63251  | 4.58077    | 3.95142    | 3.29819   |
| HERC3   | 3.70321   | 3.6857   | 4.16851  | 4.48642    | 4.11202    | 4.68587   |
| HERC4   | 5.23312   | 5.25247  | 4.74114  | 4.89916    | 5.48274    | 5.53107   |
| HERC5   | 3.32052   | 3.45154  | 1.5913   | 1.83957    | 3.42582    | 3.73207   |
| HERC6   | 1.52496   | 1.65613  | 1.31637  | 1.46864    | 2.89428    | 2.89692   |
| HERPUD1 | 3.89803   | 3.82602  | 4.90989  | 5.40489    | 5.67758    | 5.86171   |
| HERPUD2 | 3.71031   | 3.34774  | 3.76485  | 3.57066    | 3.5959     | 3.15748   |
| HES1    | 2.84589   | 2.96343  | 1.49599  | 1.48367    | 3.25707    | 3.35127   |
| HES6    | 1.91933   | 1.47971  | 0.120378 | 0.176693   | 1.38413    | 1.92267   |
| HEXA    | 5.65552   | 5.44728  | 5.59455  | 5.79483    | 5.38987    | 5.3252    |
| HEXB    | 6.04307   | 5.9065   | 6.27538  | 6.85397    | 6.27381    | 6.70284   |
| HEXDC   | 1.03569   | 0.707154 | 1.79378  | 1.77384    | 1.65713    | 1.60621   |
| HEXIM1  | 4.28875   | 4.33134  | 4.48606  | 4.72219    | 5.83144    | 5.77231   |
| HEXIM2  | 1.47882   | 1.14107  | 1.66355  | 1.69073    | 0.743808   | 1.5296    |
| HEY1    | 0.640852  | 0.467989 | 2.56803  | 2.81302    | 4.63431    | 3.98503   |
| HEY2    | 1.9303    | 2.03303  | -4.59508 | -4.52056 ? | ?          |           |
| HFE     | 2.47835   | 2.98217  | 3.86496  | 4.38802    | 3.81339    | 4.33904   |
| HGF     | 3.2168    | 3.51157  | -1.48269 | -3.78492   | -5.65305 ? |           |
| HGH1    | 2.87078   | 2.84323  | 2.93283  | 3.29844    | 3.52705    | 3.68988   |
| HGS     | 5.42641   | 5.12174  | 4.52148  | 4.94847    | 5.45843    | 5.27208   |
| HGSNAT  | 4.30671   | 4.33499  | 3.9902   | 3.90816    | 2.87451    | 2.82183   |
| HHAT    | 2.29811   | 2.3413   | 0.558032 | 0.46112    | 1.51465    | 1.97279   |
| HHIP    | 2.70173   | 4.05875  | -1.09576 | -1.10853   | -1.17713   | -1.06257  |
| HHIPL2  | -2.89067  | -2.55512 | 3.28     | 3.7351     | -0.510371  | -0.183001 |
| HIAT1   | 5.08677   | 5.29869  | 4.54269  | 5.00165    | 5.2682     | 5.48125   |
| HIATL1  | 5.07697   | 5.18119  | 4.64185  | 5.23532    | 4.99919    | 5.63631   |
| HIBADH  | 4.85405   | 4.66321  | 4.79518  | 5.26999    | 3.59472    | 4.11505   |
| HIBCH   | 3.04744   | 3.29196  | 3.42566  | 3.43614    | 3.72811    | 4.0038    |
| HIC2    | 2.61843   | 2.31853  | 2.72196  | 2.55652    | 1.7191     | 0.541297  |
| HIF1A   | 8.8209    | 8.63075  | 7.42915  | 7.75552    | 9.36972    | 9.09028   |

|           |           |           |           |          |           |          |
|-----------|-----------|-----------|-----------|----------|-----------|----------|
| HIF1AN    | 5.1292    | 5.23422   | 5.36911   | 5.67068  | 5.78098   | 5.83679  |
| HIGD1A    | 4.62614   | 4.59784   | 4.48157   | 4.88759  | 5.34582   | 6.04764  |
| HIGD1AP1  | -0.509374 | -0.476579 | -0.370639 | -0.19731 | 0.506724  | 0.886449 |
| HIGD2A    | 2.95836   | 2.78598   | 3.44569   | 3.75119  | 4.34848   | 4.50853  |
| HILPDA    | 3.14404   | 3.28016   | 2.44893   | 2.77973  | 2.84979   | 2.38506  |
| HINFP     | 3.01688   | 3.05088   | 3.19152   | 3.28564  | 3.05394   | 2.85935  |
| HINT1     | 6.50455   | 6.46154   | 6.48065   | 6.94537  | 6.56392   | 7.42819  |
| HINT1P1   | 1.13487   | 1.44505   | 1.37231   | 1.76494  | 1.75928   | 1.80111  |
| HINT2     | 2.80077   | 2.59786   | 2.76777   | 3.11035  | 3.16942   | 3.71745  |
| HINT3     | 2.80276   | 2.85004   | 2.09727   | 2.6225   | 4.00768   | 4.11026  |
| HIP1      | 5.17245   | 5.19847   | 5.53196   | 5.59681  | 4.22462   | 3.79511  |
| HIP1R     | 2.57706   | 2.49136   | 2.5273    | 2.60199  | 2.51213   | 1.99375  |
| HIPK1     | 5.82364   | 6.0209    | 6.02408   | 6.44626  | 6.0141    | 5.8832   |
| HIPK2     | 7.4072    | 6.30325   | 8.51538   | 7.74489  | 7.20518   | 5.9299   |
| HIPK3     | 6.03881   | 5.53501   | 5.23327   | 5.12897  | 6.14442   | 5.77759  |
| HIRA      | 4.37536   | 4.25126   | 3.81889   | 3.88889  | 3.4808    | 3.22203  |
| HIRIP3    | 3.05839   | 2.80218   | 2.35183   | 2.39441  | 2.77949   | 1.93271  |
| HIST1H1B  | 7.16412   | 7.15105   | 7.26987   | 7.56159  | 6.79898   | 7.84426  |
| HIST1H1C  | 7.1011    | 7.3787    | 7.58227   | 8.14818  | 7.27916   | 7.98458  |
| HIST1H1D  | 5.50609   | 5.6424    | 6.5277    | 6.92441  | 6.17138   | 6.97166  |
| HIST1H1E  | 6.21043   | 6.20691   | 6.78944   | 7.00409  | 6.22842   | 7.07709  |
| HIST1H2AB | 3.89803   | 3.82833   | 3.96749   | 4.24762  | 3.5888    | 5.33904  |
| HIST1H2AC | 5.6192    | 5.56748   | 5.82769   | 6.1783   | 5.87908   | 6.61937  |
| HIST1H2AD | 5.24306   | 5.15278   | 5.25993   | 5.63726  | 4.94166   | 6.04063  |
| HIST1H2AE | 5.65791   | 5.67029   | 5.22639   | 5.52779  | 4.87447   | 5.46445  |
| HIST1H2AG | 6.16316   | 6.22889   | 5.84782   | 6.23379  | 5.79449   | 6.72503  |
| HIST1H2AH | 5.51548   | 5.49834   | 2.04532   | 2.2562   | 5.00699   | 6.0205   |
| HIST1H2AI | 5.94074   | 5.90888   | 6.13247   | 6.44248  | 5.71333   | 6.53166  |
| HIST1H2AJ | 3.64051   | 3.61811   | 3.99268   | 4.11483  | 2.05436   | 2.77715  |
| HIST1H2AK | 1.9633    | 1.68045   | 1.23194   | 0.676755 | 1.61928   | 2.23353  |
| HIST1H2AL | 2.73347   | 2.41981   | 2.88795   | 3.1835   | 3.3537    | 4.13091  |
| HIST1H2AM | 4.43646   | 4.32489   | 4.70002   | 5.15675  | 4.02699   | 4.79887  |
| HIST1H2BB | 5.33447   | 5.40307   | 3.85138   | 4.29457  | 4.64115   | 5.49815  |
| HIST1H2BC | 5.61895   | 5.58179   | 5.66659   | 6.26592  | 5.60175   | 5.95217  |
| HIST1H2BD | 6.33153   | 6.31915   | 6.15742   | 6.47595  | 6.24959   | 6.62472  |
| HIST1H2BE | 4.2364    | 4.07128   | 2.30731   | 2.63551  | 3.17761   | 3.21527  |
| HIST1H2BF | 4.48082   | 4.27045   | 4.54591   | 4.90404  | 4.53215   | 4.57388  |
| HIST1H2BG | 6.4281    | 6.59547   | 6.29372   | 6.76787  | 5.06717   | 5.57231  |
| HIST1H2BH | 5.08063   | 4.91598   | 5.48933   | 5.8555   | 5.37035   | 5.70373  |
| HIST1H2BI | 0.908313  | 0.912259  | 5.57136   | 6.09504  | 5.23629   | 5.89644  |
| HIST1H2BJ | 5.322     | 5.49102   | 4.65097   | 5.46575  | 5.04851   | 5.58558  |
| HIST1H2BK | 5.80032   | 5.88108   | 2.3598    | 2.74148  | 5.37973   | 5.85912  |
| HIST1H2BL | 4.58022   | 4.60318   | 4.74573   | 5.07845  | 4.21798   | 4.72731  |
| HIST1H2BM | 2.8284    | 2.6352    | 2.0785    | 2.23549  | -0.267833 | 0.100762 |
| HIST1H2BN | 4.89523   | 4.76375   | 4.82247   | 5.16967  | 4.95012   | 5.35302  |
| HIST1H2BO | 4.91681   | 5.00925   | 5.13668   | 5.65111  | 4.77918   | 5.11644  |
| HIST1H3A  | 3.33984   | 3.12961   | 2.65569   | 3.14856  | 2.96175   | 3.97978  |
| HIST1H3B  | 5.80399   | 5.76355   | 5.66509   | 6.14471  | 5.73361   | 6.88854  |
| HIST1H3C  | 5.75546   | 5.69006   | 5.55202   | 6.01787  | 5.9312    | 6.9135   |
| HIST1H3D  | 4.68731   | 4.41366   | 4.46663   | 4.59074  | 4.45473   | 5.70055  |
| HIST1H3E  | 0.159022  | -0.214764 | 0.416483  | 0.266325 | 0.416602  | 0.922708 |
| HIST1H3F  | 4.87456   | 4.58768   | 4.80018   | 5.20858  | 5.0803    | 6.56065  |

|            |          |          |           |            |            |          |
|------------|----------|----------|-----------|------------|------------|----------|
| HIST1H3G   | -3.69722 | -3.65369 | 5.97223   | 6.49641    | 5.68064    | 7.10926  |
| HIST1H3H   | 5.15967  | 5.00373  | 5.29675   | 5.55694    | 5.21236    | 6.28904  |
| HIST1H3I   | 4.18356  | 4.03301  | 4.16962   | 4.39101    | 3.27927    | 3.93353  |
| HIST1H3J   | -2.99749 | -4.13838 | 4.37472   | 4.77693    | 2.30853    | 2.77804  |
| HIST1H4A   | 3.44431  | 3.03501  | 3.41267   | 3.52598    | 3.40712    | 4.20467  |
| HIST1H4B   | 5.38605  | 5.44554  | 5.23221   | 5.90064    | 5.96013    | 7.18638  |
| HIST1H4C   | 6.32362  | 6.40905  | 5.85641   | 6.40982    | 6.73025    | 7.93499  |
| HIST1H4D   | 5.2562   | 5.25096  | 5.24483   | 5.5305     | 5.69145    | 6.64724  |
| HIST1H4E   | 5.58487  | 5.60256  | 5.68683   | 6.06765    | 5.6931     | 6.4373   |
| HIST1H4H   | 5.95375  | 6.05284  | 5.60763   | 6.0664     | 6.02968    | 6.56211  |
| HIST1H4I   | 3.07736  | 2.49136  | -1.13882  | -1.25052   | 2.74058    | 3.67266  |
| HIST1H4J   | 5.69039  | 5.48717  | 5.11795   | 5.58626 ?  | ?          |          |
| HIST1H4K   | 2.04733  | 1.96574  | 1.71157   | 2.51791 ?  | ?          |          |
| HIST1H4L   | 4.6279   | 4.44027  | 4.27077   | 4.6301     | -6.64581 ? |          |
| HIST2H2AA3 | 6.73333  | 6.58133  | 6.29159   | 6.64358    | 5.79964    | 6.54364  |
| HIST2H2AA4 | 6.00753  | 5.98946  | 5.485     | 5.95491    | 4.90008    | 5.47077  |
| HIST2H2AB  | 4.20178  | 4.00578  | 3.36915   | 3.52416    | 2.59473    | 3.61295  |
| HIST2H2AC  | 4.64363  | 4.73826  | 4.60167   | 5.01765    | 4.29296    | 5.23479  |
| HIST2H2BB  | 1.93145  | 1.6529   | -2.09954  | -2.38244   | 1.33705    | 0.772418 |
| HIST2H2BE  | 6.43669  | 6.45048  | 6.1954    | 6.60794    | 5.91206    | 6.00617  |
| HIST2H2BF  | 6.84009  | 6.66558  | 6.05102   | 6.26949    | 5.60023    | 5.65632  |
| HIST2H3A   | 5.43015  | 5.27555  | 4.7618    | 5.39981    | 4.39529    | 5.42441  |
| HIST2H3C   | 5.32939  | 5.04935  | 4.90318   | 5.20223    | 4.26105    | 5.6785   |
| HIST2H3D   | 3.54726  | 2.81173  | 3.63742   | 3.78048    | 2.76992    | 4.42451  |
| HIST2H4A   | 6.96337  | 6.55565  | 6.59319   | 7.10679    | 6.33729    | 7.47491  |
| HIST2H4B   | 5.58836  | 5.67692  | 5.41837   | 5.98704    | 5.29242    | 5.9715   |
| HIST3H2A   | 1.33439  | 0.592522 | -6.17309  | -5.85885   | 1.40582    | 2.09421  |
| HIST3H2BB  | 3.30595  | 2.7042   | -4.18092  | -3.78492   | 2.62384    | 2.56545  |
| HIST4H4    | 2.30936  | 1.78985  | 3.02349   | 3.28349    | 3.32695    | 3.99373  |
| HIVEP1     | 4.57528  | 4.57126  | 4.95856   | 5.06982    | 4.37587    | 4.09903  |
| HIVEP2     | 5.06002  | 5.05778  | 4.84717   | 4.92182    | 5.01479    | 4.5959   |
| HIVEP3     | 4.39631  | 4.35092  | 2.61739   | 2.54582    | 3.93959    | 4.06807  |
| HJURP      | 6.40774  | 6.36745  | 6.56314   | 6.83407    | 5.74191    | 5.80555  |
| HK1        | 5.90567  | 5.80836  | 6.42754   | 6.91734    | 7.66665    | 7.21439  |
| HK2        | 5.02811  | 4.3725   | 4.05428   | 4.38334    | 5.24006    | 3.73113  |
| HK2P1      | 1.45458  | 0.840105 | 0.717491  | 0.655104   | 1.50085    | 0.211249 |
| HKR1       | 4.25146  | 4.13335  | 3.33218   | 3.29632    | 4.0548     | 3.27628  |
| HLA-A      | 7.55668  | 7.50164  | 8.6987    | 8.86319    | 8.1722     | 8.44009  |
| HLA-B      | 5.03664  | 4.92177  | 8.23718   | 8.378      | 6.53937    | 6.6631   |
| HLA-C      | 4.13413  | 3.97787  | 7.9851    | 8.15479    | 5.93724    | 5.91259  |
| HLA-DMA    | 4.98609  | 4.15828  | 1.37111   | 1.93559    | -3.07415   | -1.70626 |
| HLA-DMB    | 3.65517  | 3.11081  | 1.26773   | 2.11519 ?  | ?          |          |
| HLA-DOA    | 3.57122  | 2.3413   | -3.85951  | -2.78591   | -6.64581   | -5.69922 |
| HLA-DPA1   | 6.85929  | 6.44384  | 2.6109    | 3.05859    | -6.64581 ? |          |
| HLA-DPB1   | 5.26004  | 4.63585  | 0.770744  | 1.48367    | -5.07051 ? |          |
| HLA-DQA1   | 5.08299  | 3.95064  | -6.17309  | -6.09892 ? | ?          |          |
| HLA-DQB1   | 4.99348  | 4.32456  | -6.17309  | -6.09892 ? | ?          |          |
| HLA-DRA    | 8.10682  | 7.36908  | -0.861345 | -0.380732  | -3.85089   | -5.69922 |
| HLA-DRB1   | 7.35274  | 6.86844  | -1.42826  | -1.48579   | -5.65305   | -4.11926 |
| HLA-DRB5   | 4.32077  | 3.78091  | -4.59508  | -3.43715 ? | ?          |          |
| HLA-E      | 5.44338  | 5.3343   | 6.61275   | 6.87191    | 6.43396    | 6.71827  |
| HLA-F      | 2.30198  | 1.67991  | 3.4489    | 3.4779     | 2.2372     | 2.32992  |

|            |            |             |            |           |             |           |
|------------|------------|-------------|------------|-----------|-------------|-----------|
| HLA-F-AS1  | 0.629399   | 0.640427    | 1.13749    | 1.49703   | 0.696118    | 0.471583  |
| HLA-H      | -1.79002   | -0.935252   | 0.854307   | 1.47639   | -0.00209776 | 0.301108  |
| HLA-L      | 1.77839    | 1.67203     | 1.46358    | 1.37688   | 2.00134     | 1.41481   |
| HLCS       | 3.7675     | 3.78863     | 4.30331    | 4.28562   | 3.767       | 3.64202   |
| HLF        | 0.0289651  | 0.0918691   | -1.229     | -1.10853  | 0.871134    | 1.12623   |
| HLTF       | 5.41334    | 5.57197     | 6.42448    | 6.59725   | 6.27024     | 6.68614   |
| HM13       | 6.40465    | 6.27149     | 6.19936    | 6.54658   | 6.07083     | 6.0486    |
| HMBOX1     | 3.91102    | 3.76837     | 4.00259    | 3.86845   | 3.39226     | 3.03138   |
| HMBS       | 3.40026    | 3.15003     | 3.66197    | 3.90379   | 3.00147     | 3.3101    |
| HMCES      | 3.84395    | 3.97698     | 3.40332    | 3.82928   | 3.10788     | 3.27913   |
| HMCN1      | 8.2533     | 8.36873     | 5.99077    | 4.84536   | 6.85746     | 6.88643   |
| HMG20A     | 5.00424    | 4.89632     | 4.86493    | 4.84449   | 4.9576      | 4.76495   |
| HMG20B     | 5.77713    | 5.11552     | 3.42895    | 3.62012   | 4.19348     | 4.0212    |
| HMGA1      | 7.67885    | 7.45396     | 5.19058    | 5.73332   | 6.79691     | 6.57181   |
| HMGA1P2    | 3.35043    | 3.16344     | 1.30444    | 1.44717   | 2.39999     | 2.06306   |
| HMGA1P8    | 1.67708    | 1.67224     | -0.0256087 | 0.164181  | 1.15134     | 0.445441  |
| HMGA2      | 6.50711    | 6.29357     | 3.30246    | 3.72233   | 4.53476     | 4.71324   |
| HMGB1      | 7.58471    | 7.5242      | 6.84001    | 7.01321   | 6.83312     | 7.06878   |
| HMGB1P5    | 6.35899    | 6.36206     | 5.56367    | 5.71309   | 5.57388     | 6.0378    |
| HMGB2      | 6.68728    | 6.43837     | 5.93151    | 6.04945   | 6.60428     | 6.38006   |
| HMGB3      | 4.73431    | 4.5455      | 4.14341    | 4.20402   | 4.93547     | 4.93724   |
| HMGB3P6    | 0.00396197 | 0.223435    | 0.0163965  | 0.0980826 | 0.63671     | 0.440357  |
| HMGCL      | 1.91933    | 1.76119     | 3.22587    | 3.44577   | 2.92841     | 3.33221   |
| HMGCR      | 7.37451    | 7.18059     | 6.18033    | 6.46246   | 6.01849     | 6.43887   |
| HMGCS1     | 5.17756    | 5.18843     | 5.34678    | 5.80984   | 5.3221      | 6.23959   |
| HMGN1      | 5.41878    | 5.45009     | 6.45033    | 6.57505   | 5.98687     | 6.27729   |
| HMGN1P38   | 2.28743    | 2.29149     | 3.32448    | 3.55168   | 3.19182     | 3.32272   |
| HMGN1P4    | -0.0114149 | 0.180021    | 1.17646    | 1.09432   | 1.25525     | 0.710957  |
| HMGN2      | 7.04192    | 6.68336     | 6.33727    | 6.41115   | 7.18269     | 7.45427   |
| HMGN2P4    | 1.79561    | 1.48578     | 1.35653    | 1.26116   | 2.06681     | 1.82836   |
| HMGN2P5    | 5.53484    | 5.16388     | 4.96125    | 4.90527   | 5.72676     | 5.52309   |
| HMGN3      | 4.77451    | 4.78636     | 3.23983    | 3.41003   | 4.6508      | 4.67017   |
| HMGN3-AS1  | 0.988856   | 0.600184    | 0.109106   | 0.202299  | 0.749903    | 0.0788147 |
| HMGN4      | 4.09208    | 4.24967     | 3.79947    | 4.17888   | 4.9754      | 5.53466   |
| HMGXB3     | 5.27904    | 5.25465     | 5.6659     | 5.82929   | 6.00463     | 5.8811    |
| HMGXB4     | 4.99745    | 4.95131     | 4.39579    | 4.43226   | 3.90955     | 3.73      |
| HMHA1      | 1.62738    | 0.929533    | 1.23438    | 1.51326   | 2.27928     | 2.28766   |
| HMMR       | 4.47004    | 4.58275     | 5.16559    | 5.82479   | 5.18971     | 6.01177   |
| HMOX1      | 2.08557    | 1.40138     | 3.61737    | 4.09818   | 5.33403     | 5.33219   |
| HMOX2      | 3.4505     | 3.65933     | 3.48536    | 3.85407   | 3.3565      | 3.71113   |
| HN1        | 4.86316    | 4.79277     | 5.03866    | 5.54937   | 6.46992     | 6.66886   |
| HN1L       | 6.38791    | 6.6079      | 5.5091     | 5.90537   | 6.02178     | 5.92255   |
| HNMT       | 0.71885    | 0.265185    | 3.07151    | 3.43614   | 4.48434     | 5.88807   |
| HNRNPA0    | 5.64742    | 5.57983     | 4.96749    | 5.07418   | 5.30474     | 4.9199    |
| HNRNPA1    | 7.54546    | 7.44018     | 6.45265    | 6.72188   | 7.22075     | 6.93512   |
| HNRNPA1L2  | 4.28753    | 4.20438     | 3.24445    | 3.56954   | 3.90959     | 3.82822   |
| HNRNPA1P10 | 4.47841    | 4.33324     | 3.00886    | 3.65313   | 4.22421     | 3.80595   |
| HNRNPA1P16 | 0.613598   | 0.342589    | 0.784537   | 0.685662  | 0.172692    | -1.31405  |
| HNRNPA1P4  | 0.675617   | 0.741825    | -0.405853  | -0.361478 | 0.0816669   | 0.0812851 |
| HNRNPA1P48 | 7.68722    | 7.52595     | 6.31546    | 6.61275   | 7.36469     | 6.90209   |
| HNRNPA1P49 | -0.0550876 | -0.00328298 | 0.259532   | 0.0410467 | 0.939663    | -0.577229 |
| HNRNPA1P7  | 7.3236     | 7.21154     | 6.28389    | 6.42321   | 6.89211     | 6.91624   |



|                |             |           |           |             |            |           |
|----------------|-------------|-----------|-----------|-------------|------------|-----------|
| HNRNPA2B1      | 8.75404     | 8.64058   | 8.52954   | 8.53674     | 8.63243    | 7.9558    |
| HNRNPA3        | 6.26841     | 6.1913    | 7.21907   | 7.04364     | 6.38803    | 6.20341   |
| HNRNPA3P10     | 0.931955    | 0.815477  | 0.827949  | 1.04801     | 1.34025    | 0.0803575 |
| HNRNPA3P5      | 1.08519     | 1.017     | 1.4774    | 1.77276     | 1.59198    | 0.486405  |
| HNRNPA3P6      | 4.86247     | 4.6569    | 5.3476    | 5.26023     | 5.0886     | 4.8999    |
| HNRNPAB        | 5.83454     | 5.83569   | 5.71278   | 6.11074     | 6.30202    | 6.28368   |
| HNRNPABP1      | 0.490837    | 0.737496  | 0.782333  | 1.12963     | 1.10205    | 0.686433  |
| HNRNPC         | 7.94643     | 7.97183   | 7.16551   | 7.3438      | 8.02244    | 8.36421   |
| HNRNPCL1       | 0.346395    | 0.460952  | -0.492026 | -0.512164   | 0.178594   | 0.82881   |
| HNRNPCL2       | 5.7959      | 5.84679   | 4.92284   | 5.1716      | 5.91489    | 6.37002   |
| HNRNPCL3       | 0.537604    | 0.908037  | 0.115313  | -0.00298658 | 1.04967    | 0.76562   |
| HNRNPCL4       | 0.614173    | 0.888235  | -0.145273 | 0.169104    | 0.674171   | 1.34948   |
| HNRNPD         | 5.71902     | 5.59269   | 5.60823   | 5.41111     | 5.45138    | 5.22623   |
| HNRNPDL        | 6.92558     | 7.00425   | 6.56319   | 6.72844     | 7.05041    | 7.01695   |
| HNRNPF         | 6.98484     | 7.05605   | 5.976     | 6.31007     | 7.13409    | 7.29435   |
| HNRNPH1        | 8.39421     | 8.36622   | 8.38202   | 8.51789     | 8.75393    | 8.06734   |
| HNRNPH1P3      | 1.86513     | 2.21255   | 1.70682   | 2.14961     | 2.1154     | 1.52739   |
| HNRNPH2        | 5.60155     | 5.44928   | 5.21209   | 5.40072     | 6.17151    | 5.98033   |
| HNRNPH3        | 5.27342     | 5.24083   | 5.17114   | 5.25995     | 5.11518    | 4.44551   |
| HNRNPK         | 7.88671     | 7.81835   | 7.30585   | 7.60135     | 8.05641    | 8.20288   |
| HNRNPKP1       | 1.55898     | 1.54133   | 1.1488    | 1.28706     | 1.79942    | 1.84267   |
| HNRNPKP2       | 3.01486     | 3.17071   | 2.46167   | 2.92545     | 3.21228    | 3.14535   |
| HNRNPKP4       | 5.41129     | 5.38333   | 4.77985   | 5.16352     | 5.55516    | 5.69194   |
| HNRNPL         | 6.5049      | 6.49043   | 6.19309   | 6.36119     | 6.7199     | 6.52515   |
| HNRNPLL        | 4.59495     | 4.61996   | 4.40331   | 4.73194     | 4.71852    | 5.03643   |
| HNRNPLP1       | 0.0806304   | 0.427145  | -0.467071 | -0.045293   | 0.278794   | -0.178865 |
| HNRNPLP2       | 4.88489     | 4.97656   | 4.40201   | 4.76342     | 5.02948    | 4.96559   |
| HNRNPM         | 6.35442     | 6.29596   | 5.88624   | 6.04027     | 6.39682    | 5.81241   |
| HNRNPR         | 7.43047     | 7.46437   | 6.80596   | 6.92609     | 7.31501    | 6.97992   |
| HNRNPRP1       | 3.24977     | 3.21431   | 2.52169   | 2.81064     | 3.30786    | 2.77042   |
| HNRNPU         | 8.45677     | 8.44056   | 8.07841   | 8.2784      | 8.619      | 8.34346   |
| HNRNPU-AS1     | 4.93901     | 4.99687   | 5.3741    | 5.3132      | 5.05562    | 4.43595   |
| HNRNPUL1       | 6.55559     | 6.44675   | 6.14064   | 6.2509      | 6.49465    | 6.30534   |
| HNRNPUL2       | 5.21153     | 5.04113   | 5.0066    | 5.06806     | 4.85983    | 4.50736   |
| HNRNPUL2-BSCL2 | 4.34966     | 4.2129    | 3.90209   | 4.02319     | 4.11333    | 3.30367   |
| HNRNPUP1       | 3.19632     | 3.19923   | 2.55458   | 2.88984     | 3.4773     | 2.56556   |
| HOMER1         | 3.69538     | 3.87254   | 4.02958   | 3.70175     | 3.89619    | 3.74244   |
| HOMER2         | 3.71031     | 3.62196   | 2.79087   | 2.75537     | 0.961801   | 0.650921  |
| HOMER3         | 2.83841     | 2.69931   | 2.6725    | 2.93731     | 4.56283    | 4.95875   |
| HOMEZ          | 0.863225    | 0.920918  | 2.35565   | 2.20407     | 0.714804   | 0.483199  |
| HOOK2          | 1.61384     | 1.41984   | 0.531958  | 0.913608    | 1.59711    | 1.02127   |
| HOOK3          | 5.8495      | 5.96941   | 5.47333   | 5.47848     | 5.21313    | 5.20541   |
| HOTAIR         | -0.816197   | -0.707737 | 1.74132   | 1.85699     | -2.33767   | -2.53597  |
| HOTAIRM1       | -0.00686333 | 1.02594   | 1.15638   | 1.85677     | -0.660096  | 0.35026   |
| HOXA-AS2       | 1.13386     | 1.21668   | 0.959206  | 0.563685    | -2.74516   | -4.70296  |
| HOXA1          | 0.684702    | 0.559609  | 0.120378  | 0.605504    | -0.551587  | -0.458602 |
| HOXA10         | 2.73175     | 2.25991   | -0.69145  | -0.823182 ? | ?          |           |
| HOXA2          | 0.345419    | 0.166625  | 0.816542  | 0.786061    | -2.07475   | -2.24661  |
| HOXA3          | 1.05586     | 0.395227  | 0.723445  | 0.0410467   | -3.85089 ? |           |
| HOXB-AS3       | 1.01774     | 0.824597  | -1.9199   | -2.62764 ?  | ?          |           |
| HOXB3          | 1.97223     | 1.60754   | 1.25445   | 0.896861    | 3.11118    | 2.76497   |
| HOXB4          | -0.0381159  | 0.120962  | 0.651224  | 0.86078     | -1.25135   | -1.1782   |

|          |            |            |             |            |           |            |
|----------|------------|------------|-------------|------------|-----------|------------|
| HOXB6    | 2.47575    | 2.3732     | -0.499551   | -0.60591   | -0.530833 | -0.662104  |
| HOXB7    | 3.54528    | 3.50581    | -5.1783     | -5.10387   | 3.09958   | 3.38869    |
| HOXB9    | 3.03054    | 2.39515    | -1.42826    | -1.15432   | -0.121008 | -0.38461   |
| HOXC10   | 2.43022    | 2.38266    | 2.04532     | 2.12001    | 2.5221    | 2.78756    |
| HOXC11   | 1.54413    | 1.66647    | 0.544485    | 0.902467   | -6.64581  | -5.69922   |
| HOXC13   | 1.68444    | 1.24877    | 1.54923     | 1.27766    | 1.91279   | 1.40019    |
| HOXC4    | 0.917019   | 1.0518     | 0.655416    | 0.660062   | 0.790972  | 1.11596    |
| HOXC6    | 1.68423    | 1.8609     | 0.943284    | 0.879729   | 1.22319   | 1.31548    |
| HOXC8    | 1.4199     | 1.33161    | -0.0134653  | 0.020584   | -1.23372  | -2.24661   |
| HOXC9    | 1.5292     | 1.58158    | -0.117291   | -0.716287  | 0.420703  | -0.0404257 |
| HOXD10   | 1.26628    | 0.888734   | 3.25599     | 2.71723    | 3.63975   | 2.82008    |
| HOXD11   | 0.744618   | 0.428239   | 2.07698     | 1.81101    | 2.78107   | 2.50847    |
| HOXD13   | 2.29246    | 2.35415    | 0.431281    | 0.619178   | -0.285108 | 0.293394   |
| HOXD3    | -0.244316  | -0.0905587 | -0.649141   | -0.669003  | 0.661786  | 0.758619   |
| HOXD4    | 0.433483   | 0.408842   | -0.00867934 | 0.289315   | 0.570142  | 0.334809   |
| HOXD8    | 2.18664    | 2.16653    | 1.94578     | 2.03075    | 2.25857   | 3.12934    |
| HOXD9    | 1.58636    | 1.47971    | 1.46757     | 0.924662   | 1.80732   | 1.40185    |
| HP1BP3   | 6.40778    | 6.64683    | 6.82102     | 7.10411    | 6.74135   | 6.72817    |
| HPCAL1   | 4.88399    | 4.80277    | 5.08383     | 5.52823    | 4.68951   | 4.4647     |
| HPRT1    | 2.01519    | 2.22717    | 3.08093     | 3.36691    | 4.09957   | 4.40181    |
| HPS1     | -6.68418   | -6.45019   | 3.10403     | 3.50956    | 3.33969   | 3.33768    |
| HPS3     | 3.68853    | 3.70666    | 5.88339     | 6.20761    | 4.60111   | 4.7946     |
| HPS4     | 4.52344    | 4.5609     | 4.51577     | 4.68314    | 3.91957   | 3.64194    |
| HPS5     | 5.59065    | 6.06021    | 4.00011     | 4.49849    | 4.62798   | 5.02205    |
| HPS6     | 3.24637    | 3.14634    | 3.00136     | 3.36894    | 3.15987   | 3.74037    |
| HPSE     | 1.68033    | 2.21313    | 2.05967     | 3.1835     | 3.01388   | 3.48064    |
| HR       | 3.68355    | 4.30698    | 4.10534     | 4.13553    | 2.55887   | 2.33222    |
| HRAS     | 3.64522    | 3.58018    | 3.13163     | 3.58814    | 2.73844   | 2.66398    |
| HRCT1    | -0.865939  | -1.7075    | -0.325375   | -0.464785  | 4.46057   | 4.27627    |
| HRH1     | 3.4895     | 3.71083    | 3.26768     | 4.13554    | 3.31267   | 3.94074    |
| HRNR     | -6.68418   | -5.45651   | 0.544485    | 0.833756   | 2.22845   | 1.1637     |
| HRSP12   | 1.90457    | 1.97181    | 2.52039     | 3.10063    | 2.35093   | 3.07465    |
| HS1BP3   | 3.24783    | 3.08019    | 2.53073     | 2.94917    | 3.43376   | 3.39657    |
| HS2ST1   | 5.84107    | 5.77622    | 5.93541     | 6.08474    | 5.70417   | 5.71938    |
| HS3ST3A1 | -4.45013   | -4.45968   | -1.36986    | -1.39086   | 4.59417   | 4.49159    |
| HS3ST3B1 | -5.51808 ? |            | 3.30809     | 3.31259    | 5.42677   | 5.21373    |
| HS6ST1   | 3.90537    | 3.69716    | 3.8475      | 3.70149    | 3.2603    | 2.70269    |
| HS6ST2   | ? ?        |            | -2.72315    | -2.40763   | 4.28659   | 4.58446    |
| HS6ST3   | -5.10914   | -5.45651   | 2.70218     | 3.0153 ?   |           | ?          |
| HSBP1    | 6.47148    | 6.42814    | 5.53875     | 5.87524    | 6.16618   | 6.65681    |
| HSBP1L1  | 1.30097    | 1.30538    | 2.39392     | 2.94375    | 1.67511   | 1.58794    |
| HSBP1P2  | 0.288831   | 0.636061   | -0.0491196  | -0.0657432 | 0.429803  | 0.61884    |
| HSCB     | 1.14135    | 1.045      | 1.21235     | 1.23082    | 1.52049   | 1.83627    |
| HSD11B1  | -5.10914   | -5.45651   | 1.54444     | 2.46483 ?  |           | ?          |
| HSD11B1L | 0.205668   | 0.137189   | 0.401532    | 0.47387    | 1.14422   | 1.94304    |
| HSD17B1  | 1.59686    | 1.15292    | 1.60897     | 1.6719     | 2.17647   | 1.53742    |
| HSD17B10 | 4.56946    | 4.56919    | 3.48182     | 3.91353    | 4.14139   | 4.53406    |
| HSD17B11 | 4.34395    | 4.29616    | 2.93543     | 3.19724    | 1.97271   | 2.91168    |
| HSD17B12 | 4.59082    | 4.53105    | 3.49421     | 3.72569    | 6.03638   | 6.08506    |
| HSD17B4  | 5.63813    | 5.71043    | 5.50337     | 5.77402    | 5.45101   | 5.61516    |
| HSD17B7  | 3.63615    | 3.64223    | 2.79802     | 3.2073     | 2.84486   | 3.25387    |
| HSD3BP5  | 2.33353    | 2.46728    | -2.27595    | -1.02108   | -1.10542  | -0.662104  |

|            |            |           |           |             |            |          |
|------------|------------|-----------|-----------|-------------|------------|----------|
| HSDL1      | 4.29385    | 4.2514    | 4.62866   | 4.84754     | 4.08956    | 3.72791  |
| HSDL2      | 4.14718    | 4.22802   | 4.2152    | 4.4883      | 4.27705    | 4.49784  |
| HSF1       | 3.04877    | 3.01315   | 3.80169   | 3.98021     | 3.83423    | 4.06657  |
| HSF2       | 3.27963    | 3.09926   | 3.16943   | 3.27056     | 3.63993    | 3.83438  |
| HSF4       | -0.0789568 | -0.448296 | 1.90887   | 1.6043      | 0.0450515  | -1.24187 |
| HSP90AA1   | 9.48092    | 9.3091    | 8.39713   | 8.57225     | 9.71332    | 9.9952   |
| HSP90AA2P  | 5.74039    | 5.6188    | 4.62769   | 4.87823     | 5.97651    | 6.19503  |
| HSP90AB1   | 9.43429    | 9.38321   | 9.05271   | 9.33374     | 10.1117    | 9.88336  |
| HSP90AB2P  | 1.71902    | 2.01803   | 1.31311   | 1.75322     | 2.54127    | 1.97702  |
| HSP90AB3P  | 5.96219    | 6.00456   | 5.6651    | 5.91415     | 6.67535    | 6.31993  |
| HSP90B1    | 10.0964    | 10.0032   | 9.01036   | 9.35154     | 8.84314    | 9.07211  |
| HSP90B2P   | 5.28987    | 5.44307   | 4.3864    | 4.84377     | 4.10066    | 3.93263  |
| HSP90B3P   | 4.53498    | 4.78614   | 3.60688   | 4.11348     | 3.47823    | 3.28405  |
| HSPA12A    | 3.87929    | 3.88809   | 2.75312   | 2.93557     | -1.65987   | -2.24661 |
| HSPA13     | 5.91447    | 6.02423   | 6.13275   | 6.55227     | 5.54822    | 6.08688  |
| HSPA14     | 4.37237    | 4.44779   | 3.78802   | 4.20178     | 4.40106    | 4.90245  |
| HSPA1A     | 5.19513    | 5.00578   | 5.89435   | 6.06121     | 2.91607    | 2.85005  |
| HSPA1B     | 5.60423    | 5.38422   | 6.89508   | 7.15056     | 6.804      | 6.59064  |
| HSPA4      | 7.31863    | 7.32756   | 7.01995   | 7.37104     | 7.39558    | 7.72718  |
| HSPA4L     | 5.18875    | 5.49038   | 1.68422   | 1.55906     | 4.88914    | 4.75095  |
| HSPA5      | 8.82057    | 8.57582   | 8.48513   | 8.74424     | 8.07889    | 8.06319  |
| HSPA8      | 10.2571    | 10.1979   | 9.96671   | 10.3808     | 10.2615    | 10.5841  |
| HSPA8P1    | 4.17201    | 4.22676   | 2.39186   | 2.84985     | 4.21671    | 4.55562  |
| HSPA8P5    | 3.0637     | 3.31924   | 2.67343   | 3.22613     | 2.88561    | 3.12145  |
| HSPA8P7    | 3.17562    | 3.15824   | 2.84525   | 3.50887     | 3.10445    | 3.69971  |
| HSPA8P8    | 3.37142    | 3.3654    | 3.11931   | 3.49453     | 3.39025    | 3.61988  |
| HSPA8P9    | 1.71181    | 1.95667   | 2.10797   | 2.53488     | 1.50665    | 1.79837  |
| HSPA9      | 7.72441    | 7.70407   | 7.6139    | 8.10159     | 8.09963    | 8.15483  |
| HSPA9P1    | 3.97272    | 3.98864   | 3.78955   | 4.39329     | 4.40366    | 4.18667  |
| HSPB1      | 4.55815    | 4.2744    | 4.99874   | 5.3868      | 5.45591    | 5.62427  |
| HSPB11     | 3.32744    | 3.3429    | 3.90261   | 4.30162     | 3.52332    | 4.33357  |
| HSPB1P2    | -0.590352  | -0.56876  | 0.294194  | 0.563685    | 0.804054   | 0.463298 |
| HSPB8      | 2.41468    | 2.66387   | 3.08561   | 3.66101     | 3.23451    | 3.34857  |
| HSPBAP1    | 2.48084    | 2.47675   | 1.69303   | 1.73669     | 1.63434    | 2.14505  |
| HSPBP1     | 3.00828    | 2.95079   | 2.02107   | 2.43035     | 3.5745     | 3.60391  |
| HSPD1      | 8.14999    | 7.97408   | 7.29968   | 7.57406     | 8.82138    | 8.88429  |
| HSPD1P1    | 5.49293    | 5.42358   | 4.68816   | 4.95013     | 6.22752    | 6.14649  |
| HSPD1P11   | 0.586404   | 0.395227  | 2.7909    | 2.57066     | 0.790972   | -0.31423 |
| HSPD1P5    | 0.103545   | 0.135338  | -0.968483 | 0.000461589 | 0.719587   | 0.413832 |
| HSPD1P6    | 0.672471   | 0.81004   | -0.152059 | 0.139902    | 1.44356    | 1.4025   |
| HSPE1      | 5.46105    | 5.20397   | 4.66358   | 4.84488     | 6.21593    | 6.5649   |
| HSPE1-MOB4 | 0.628363   | 0.27066   | 0.295123  | -0.794918   | -0.468433  | 2.33189  |
| HSPE1P2    | 3.24746    | 2.8816    | 2.46455   | 2.54566     | 3.88552    | 4.22735  |
| HSPE1P3    | 2.14171    | 1.8573    | 1.29124   | 1.54711     | 2.63318    | 3.24155  |
| HSPG2      | 6.54632    | 6.19119   | 5.12652   | 4.65843     | 0.159978   | 0.633217 |
| HSPH1      | 6.41257    | 6.42876   | 6.68856   | 7.10423     | 7.03271    | 7.13585  |
| HTATSF1    | 4.22055    | 4.31195   | 4.97256   | 5.25309     | 5.81814    | 5.80652  |
| HTN1       | 1.53936    | 1.89473 ? |           | -6.09892    | -6.64581 ? |          |
| HTR2B      | 1.11453    | 1.15798   | 2.115     | 1.86268     | 0.498608   | 0.863209 |
| HTR7       | 3.18792    | 3.37005   | 0.0645242 | 1.27492     | 4.33683    | 4.35533  |
| HTR7P1     | 1.17838    | 0.727049  | 1.93544   | 1.71138     | -0.373808  | -1.006   |
| HTRA1      | 5.74022    | 5.39396   | 2.98891   | 3.1224      | 3.87593    | 4.41741  |

|          |           |            |            |          |            |          |
|----------|-----------|------------|------------|----------|------------|----------|
| HTRA2    | 3.95337   | 3.79596    | 3.54521    | 3.77964  | 3.55429    | 3.88006  |
| HTRA3    | ?         | ?          | 1.46757    | 1.34243  | -1.41201   | -2.12114 |
| HTT      | 5.69564   | 5.62325    | 5.80838    | 5.85656  | 6.49445    | 6.2471   |
| HUS1     | 3.43918   | 3.54837    | 3.12026    | 3.26621  | 3.72662    | 3.84018  |
| HUWE1    | 7.86083   | 7.82842    | 7.29062    | 7.36055  | 7.34627    | 7.0736   |
| HYAL2    | 5.42275   | 5.34572    | 3.80232    | 3.83076  | 4.80982    | 5.16519  |
| HYAL3    | 2.4223    | 2.67351    | 0.25753    | 1.09899  | 0.778267   | 0.805994 |
| HYI      | 4.90141   | 4.85161    | 3.45635    | 3.81994  | 1.56815    | 1.56467  |
| HYKK     | 0.863225  | 0.318612   | 0.584741   | 0.761609 | -0.374735  | -0.31423 |
| HYLS1    | 2.15581   | 2.16653    | 0.371169   | 0.810106 | 0.69732    | 1.11352  |
| HYOU1    | 7.84626   | 7.62969    | 7.51276    | 7.75314  | 7.02131    | 6.67804  |
| HYPK     | 2.43031   | 2.66272    | 2.76156    | 2.71438  | 3.07474    | 2.54474  |
| IAH1     | 3.83689   | 3.76339    | 3.12923    | 3.35356  | 3.60991    | 4.02545  |
| IARS     | 7.06476   | 7.16228    | 6.43781    | 6.98391  | 7.0535     | 7.19319  |
| IARS2    | 6.3643    | 6.45189    | 5.58092    | 6.01916  | 6.53857    | 6.58099  |
| IBA57    | 1.85169   | 1.554      | 1.61093    | 1.43037  | 2.13412    | 1.80111  |
| IBTK     | 6.02929   | 5.90402    | 5.20341    | 5.41129  | 6.11879    | 6.29257  |
| ICA1     | 1.98744   | 2.27188    | -6.17309 ? |          | -3.48878   | -4.11926 |
| ICA1L    | 1.52526   | 1.62764    | 2.16444    | 2.04344  | 1.07686    | 0.626084 |
| ICAM1    | 8.10741   | 7.94011    | 2.73282    | 2.87433  | 2.1517     | 1.50278  |
| ICAM3    | 0.699925  | 0.940708   | 0.628522   | 1.08157  | 0.620202   | 1.67178  |
| ICE1     | 6.58255   | 6.57675    | 6.22214    | 6.39399  | 6.66146    | 6.6183   |
| ICE2     | 4.38369   | 4.47967    | 4.57795    | 4.70002  | 5.16296    | 5.42126  |
| ICK      | 3.68029   | 3.6365     | 3.12254    | 3.7193   | 5.9553     | 6.0962   |
| ICMT     | 6.12707   | 6.20715    | 5.80231    | 6.34673  | 6.38119    | 6.61129  |
| ICOSLG   | 0.61388   | 1.19542    | 2.84439    | 2.82782  | -3.07415   | -2.24661 |
| ICT1     | 2.59785   | 2.68182    | 3.12254    | 3.74292  | 3.88851    | 4.79213  |
| ID1      | 3.67487   | 3.8086     | 4.5722     | 5.23546  | 5.13657    | 6.18734  |
| ID2      | -0.395122 | -0.0876674 | 1.5913     | 2.20407  | 4.11448    | 5.7971   |
| ID3      | 2.56538   | 2.23761    | 3.56802    | 3.93146  | 5.21465    | 6.31632  |
| ID4      | 2.43536   | 2.55397    | -1.86109   | -2.30078 | 2.97269    | 3.72165  |
| IDE      | 5.41567   | 5.48734    | 5.27743    | 5.66145  | 5.62278    | 5.88945  |
| IDH1     | 5.49167   | 5.37515    | 6.4751     | 6.95675  | 5.88995    | 6.39332  |
| IDH2     | 3.86221   | 3.16103    | 5.36192    | 5.72881  | 2.34813    | 1.55071  |
| IDH3A    | 4.84631   | 4.79613    | 4.49601    | 4.82968  | 5.60955    | 5.709    |
| IDH3B    | 5.0608    | 5.08742    | 5.20178    | 5.70373  | 5.07312    | 5.21064  |
| IDH3G    | 3.51973   | 3.2882     | 3.60784    | 3.9551   | 4.41035    | 4.48167  |
| IDI1     | 5.31979   | 5.46847    | 4.25437    | 4.86337  | 5.18647    | 6.20083  |
| IDI2-AS1 | 0.14702   | 0.0802074  | -0.903255  | -0.37916 | -0.0953903 | 1.09099  |
| IDS      | 4.65682   | 5.45263    | 5.06405    | 6.15629  | 6.63526    | 7.18163  |
| IER2     | 2.88777   | 3.10891    | 2.82211    | 3.08593  | 3.43244    | 3.59249  |
| IER3     | 7.1279    | 6.56825    | 2.67755    | 2.93466  | 2.81816    | 1.05645  |
| IER3IP1  | 5.15188   | 5.26888    | 4.10172    | 4.54177  | 3.69968    | 4.25768  |
| IER5     | 4.02714   | 4.13706    | 4.87446    | 4.91769  | 2.95808    | 2.98329  |
| IER5L    | 1.02208   | 0.635262   | 1.44014    | 1.89682  | 3.29077    | 3.83972  |
| IFFO1    | 3.58517   | 3.23412    | 3.46394    | 3.63769  | 2.72772    | 2.41224  |
| IFFO2    | 3.97553   | 4.3468     | 3.73086    | 4.16557  | 7.21016    | 6.75617  |
| IFI16    | 6.38174   | 6.28933    | 5.47021    | 5.81746  | 5.44134    | 5.75629  |
| IFI27    | -1.94365  | -2.00285   | -1.229     | -2.10822 | 3.6158     | 3.25618  |
| IFI27L1  | 2.07902   | 1.9925     | 1.39395    | 1.83372  | 1.96176    | 2.44812  |
| IFI27L2  | 2.41207   | 2.33483    | 1.27595    | 1.87988  | 1.5394     | 2.87073  |
| IFI30    | 2.22414   | 2.09268    | 4.49466    | 5.04609  | 0.402231   | 1.38276  |

|             |            |           |           |            |           |           |
|-------------|------------|-----------|-----------|------------|-----------|-----------|
| IFI35       | 1.68897    | 1.85006   | 3.30833   | 3.77382    | 3.18047   | 3.59249   |
| IFI44       | 2.30937    | 2.33158   | 4.55033   | 4.4686     | 6.15762   | 6.37743   |
| IFI44L      | -0.69886   | -0.847889 | 4.16298   | 3.42645    | 7.10838   | 6.89596   |
| IFI6        | 1.92665    | 1.80864   | 3.63985   | 3.77381    | 5.65059   | 4.59707   |
| IFIH1       | 2.59325    | 2.93162   | 3.41266   | 3.56183    | 3.95807   | 3.95862   |
| IFIT1       | -0.223192  | 0.237698  | 3.27591   | 3.82926    | 5.44882   | 6.36748   |
| IFIT2       | 0.41996    | 0.223769  | 2.42012   | 2.91908    | 3.4298    | 4.59021   |
| IFIT3       | 1.48583    | 1.89912   | 3.43303   | 3.82928    | 4.09874   | 4.64863   |
| IFIT5       | 3.15423    | 3.3103    | 3.74425   | 4.20405    | 4.89331   | 5.40897   |
| IFITM1      | 0.278853   | -0.783519 | 3.43018   | 3.42473    | 4.76852   | 4.08496   |
| IFITM10     | -1.99808   | -2.06994  | 3.06371   | 3.74306    | 3.23442   | 2.72115   |
| IFITM2      | -0.323933  | -2.03057  | 3.24449   | 3.44026    | 1.89951   | 1.97405   |
| IFITM3      | 5.87544    | 5.42399   | 6.43791   | 6.73333    | 4.95881   | 4.7573    |
| IFNAR1      | 5.05078    | 5.25139   | 5.32871   | 5.47001    | 4.93214   | 5.10946   |
| IFNAR2      | 3.21597    | 2.84147   | 4.25675   | 3.62955    | 1.92811   | 1.49015   |
| IFNE        | 0.529821   | 0.831845  | 0.945825  | 0.535117   | -0.356358 | 0.247587  |
| IFNGR1      | 3.71453    | 3.36687   | 4.93345   | 4.94715    | 4.24508   | 4.15436   |
| IFNGR2      | 5.23231    | 5.748     | 4.37721   | 4.62526    | 3.51826   | 3.8726    |
| IFRD1       | 4.83034    | 4.86806   | 5.68567   | 6.12628    | 5.86103   | 5.78513   |
| IFRD2       | 4.88401    | 4.82241   | 3.8349    | 4.30027    | 4.90538   | 4.93029   |
| IFT122      | 2.6575     | 2.57789   | 3.41936   | 3.70499    | 3.72623   | 3.47147   |
| IFT140      | 2.11286    | 1.91656   | 2.76315   | 2.53364    | 2.13417   | 1.60621   |
| IFT172      | 3.85359    | 3.92193   | 3.08327   | 3.21985    | 4.16384   | 3.83825   |
| IFT20       | 3.02427    | 2.98406   | 2.93702   | 3.15625    | 3.83246   | 4.50277   |
| IFT22       | 3.23756    | 3.05876   | 3.18717   | 3.43614    | 3.23905   | 3.64201   |
| IFT27       | 1.43024    | 0.912259  | 4.13162   | 3.98657    | -0.551587 | -1.006    |
| IFT43       | 1.96634    | 1.95115   | 1.33222   | 1.6394     | 2.07796   | 2.74451   |
| IFT46       | 2.99267    | 3.09366   | 2.57138   | 2.89399    | 1.73203   | 2.354     |
| IFT52       | 3.39104    | 3.56229   | 3.65883   | 4.11154    | 3.14544   | 3.8932    |
| IFT57       | 3.26237    | 3.33644   | 3.92369   | 4.27271    | 3.17889   | 3.88387   |
| IFT74       | 2.54426    | 2.47406   | 2.8637    | 3.22228    | 3.66102   | 4.68576   |
| IFT80       | 3.75953    | 4.11525   | 4.98666   | 5.27549    | 4.26995   | 4.61662   |
| IFT81       | 3.65957    | 3.36529   | 3.40144   | 3.33618    | 3.23299   | 3.16673   |
| IFT88       | 2.98918    | 2.96761   | 3.11569   | 3.09819    | 2.63432   | 3.0041    |
| IGBP1       | 3.77462    | 3.92408   | 3.42195   | 3.97064    | 4.6065    | 5.08283   |
| IGBP1P1     | -0.0695851 | -0.177293 | -0.404514 | -0.201784  | 0.606556  | 0.832509  |
| IGF1R       | 7.16653    | 6.86075   | 5.12935   | 5.02559    | 6.15005   | 5.73154   |
| IGF2BP2     | 5.66067    | 5.56615   | 4.59175   | 4.79204    | 5.6708    | 5.29541   |
| IGF2BP2-AS1 | 1.43024    | 1.25145   | 0.503064  | 0.350701   | 0.405873  | -0.577229 |
| IGF2BP3     | 3.19627    | 2.90472   | 5.96092   | 6.4293     | 4.5401    | 4.5204    |
| IGF2R       | 7.30338    | 7.33631   | 7.68327   | 7.86558    | 7.91494   | 7.6489    |
| IGFBP2      | 1.46083    | 1.23764   | 4.8023    | 4.43806    | 2.50712   | 2.54596   |
| IGFBP3      | 2.20482    | 4.23499   | 5.41034   | 6.37019    | 1.90957   | 1.64205   |
| IGFBP4      | -4.11163   | -2.37465  | 6.9984    | 7.03263    | 2.20079   | 2.39659   |
| IGFBP5      | 7.15501    | 6.51782   | 12.2702   | 12.0428    | 9.11489   | 8.11933   |
| IGFBP6      | 2.15268    | 2.33807   | 3.96369   | 4.87272    | 0.172692  | 1.74453   |
| IGFBP7      | 5.92848    | 6.03696   | 3.8352    | 3.88738    | 7.80749   | 8.15508   |
| IGFL4       | 0.0152977  | -0.333394 | -3.18222  | -2.64851   | 1.89813   | 0.97985   |
| IGFLR1      | 0.0703756  | -0.375208 | 0.464438  | 0.672335   | 0.46134   | 0.593229  |
| IGHMBP2     | 3.49444    | 3.43046   | 2.87177   | 3.09575    | 2.82552   | 2.61973   |
| IGIP        | 2.42247    | 2.68437   | 2.6109    | 2.70175    | 2.31125   | 2.77307   |
| IGSF1       | 1.16516    | 1.01295   | 0.371169  | 0.632724 ? |           | ?         |

|          |           |           |            |           |            |           |
|----------|-----------|-----------|------------|-----------|------------|-----------|
| IGSF10   | -0.329616 | -0.538689 | 2.72468    | 2.72284   | 1.08847    | 0.657219  |
| IGSF3    | 5.923     | 5.54004   | 4.91736    | 4.41545   | 6.17323    | 5.89996   |
| IGSF6    | -0.144345 | 0.257831  | 0.827461   | 0.591699  | -0.43131   | -0.577229 |
| IGSF8    | 4.1927    | 3.76837   | 3.06204    | 3.35878   | 2.87303    | 3.15127   |
| IGSF9B   | 1.48086   | 1.60328   | 0.986462   | 0.685662  | -2.85193   | -5.69922  |
| IK       | 5.57599   | 5.54525   | 5.14612    | 5.46793   | 5.74203    | 5.71356   |
| IKBIP    | 5.1334    | 5.24451   | 4.40425    | 4.75148   | 4.62566    | 4.71745   |
| IKBKAP   | 5.12544   | 5.32667   | 4.38824    | 4.78825   | 4.79501    | 4.97978   |
| IKBKB    | 4.63909   | 4.73436   | 3.91845    | 3.98128   | 4.69062    | 4.0465    |
| IKBKE    | 2.81663   | 2.83564   | 3.88093    | 4.28509   | 2.38136    | 3.07792   |
| IKBKG    | 2.90274   | 2.6091    | 3.26632    | 3.55465   | 3.78049    | 3.98175   |
| IKBKGP1  | -0.392429 | -0.262337 | 0.211261   | 0.385983  | 0.588929   | 0.868387  |
| IKZF2    | 1.80079   | 1.74176   | -1.229     | -1.35358  | 2.61116    | 2.16982   |
| IKZF4    | 0.710384  | 0.559609  | 1.17408    | 0.786061  | 0.36215    | 0.0213376 |
| IKZF5    | 2.95555   | 2.73438   | 3.16742    | 3.37701   | 3.64575    | 3.27057   |
| IL10RB   | 3.14878   | 2.77604   | 5.46352    | 5.72787   | 4.0184     | 4.4019    |
| IL11     | 2.61154   | 2.1408    | -2.37543   | -1.06415  | 4.193      | 5.06725   |
| IL11RA   | 1.30601   | 1.16152   | 1.80397    | 1.99231   | -2.05422   | -2.38405  |
| IL12A    | -1.08408  | -1.29258  | 1.0357     | 1.35065   | -0.200727  | -0.799586 |
| IL13RA1  | 4.85887   | 4.95552   | 5.72148    | 6.06422   | 4.98623    | 5.00322   |
| IL13RA2  | -3.2383   | -4.13839  | -6.17309 ? |           | 5.11823    | 6.08853   |
| IL15     | 3.20781   | 2.92948   | 2.18282    | 2.18121   | 0.661695   | 1.02127   |
| IL15RA   | -2.1135   | -2.55512  | 2.42012    | 2.51324   | -1.95932   | -3.12051  |
| IL16     | 3.53969   | 3.20881   | -0.987408  | -0.20485  | -3.23744   | -2.90575  |
| IL17D    | 0.485283  | 0.613211  | -0.65032   | -1.2711   | 1.67702    | 1.5109    |
| IL17RA   | 4.31144   | 4.23758   | 3.94446    | 4.04473   | 3.44821    | 3.19717   |
| IL17RB   | 0.345419  | 0.491443  | 0.0645242  | -0.108685 | 0.427241   | 0.0213376 |
| IL17RC   | 2.78273   | 2.56231   | 3.32823    | 3.54939   | 3.01917    | 3.22993   |
| IL17RD   | 1.98042   | 2.58429   | 1.05494    | 0.857026  | 4.35301    | 4.72582   |
| IL18     | -2.89067  | -3.65369  | -0.69145   | 0.300663  | 4.96082    | 5.26841   |
| IL18BP   | 2.88962   | 2.81421   | 2.97146    | 2.88885   | 2.16848    | 1.20314   |
| IL18R1   | 1.63187   | 2.66902   | -0.69145   | -0.131402 | -5.65305   | -4.70296  |
| IL1A     | 5.88611   | 6.58188   | -0.598354  | -0.327299 | -1.57243   | -1.18284  |
| IL1B     | 4.03985   | 4.73375   | -0.0541032 | 0.28359   | -2.13612   | -2.12114  |
| IL1R1    | 3.16821   | 2.95502   | 6.58545    | 6.33017   | 1.80732    | 2.33769   |
| IL1RAP   | 5.5264    | 5.75054   | 3.42935    | 4.06734   | 6.00634    | 5.43602   |
| IL1RAPL1 | 2.5201    | 2.05681   | 1.34008    | 0.786061  | -4.65668   | -5.69922  |
| IL20RB   | -0.744656 | -0.818747 | 2.64304    | 2.61911   | -0.136604  | -1.18284  |
| IL22RA1  | -0.159773 | 0.20969   | 1.48185    | 1.61913   | -4.07293   | -4.70296  |
| IL27RA   | 3.49568   | 3.48113   | 3.16963    | 3.36691   | 1.49454    | 1.27061   |
| IL31RA   | 2.4608    | 2.62992   | 2.00137    | 2.88836   | 3.39768    | 3.71536   |
| IL32     | 1.08887   | 1.43201   | -1.229     | -0.795121 | -1.41201   | -0.247123 |
| IL4R     | 0.800836  | 1.16656   | 4.0063     | 4.67006   | -6.64581 ? |           |
| IL6      | 3.51379   | 3.11257   | 1.8934     | 3.62982   | 0.775674   | 0.785944  |
| IL6R     | 3.18662   | 2.28201   | 1.70525    | 1.51326   | 3.14383    | 2.54596   |
| IL6ST    | 7.81442   | 7.96906   | 8.92801    | 9.60677   | 7.79479    | 8.30765   |
| IL6STP1  | 1.93115   | 2.29859   | 3.13645    | 3.82479   | 1.88958    | 2.21096   |
| IL7      | 1.37339   | 1.71244   | 2.02107    | 2.33413   | 0.458718   | 1.29424   |
| IL7R     | 3.60127   | 3.25312   | 5.17677    | 5.30267   | 5.85834    | 5.50151   |
| ILDR2    | -3.2383   | -4.13839  | 2.08328    | 2.36286   | 0.615896   | 1.35942   |
| ILF2     | 7.00768   | 7.10626   | 6.23797    | 6.75477   | 6.85798    | 7.11106   |
| ILF2P1   | 1.04945   | 1.31871   | 0.243182   | 0.868521  | 1.10129    | 0.422922  |

|             |          |          |           |           |            |          |
|-------------|----------|----------|-----------|-----------|------------|----------|
| ILF3        | 7.20603  | 7.04344  | 6.80959   | 6.79299   | 7.51961    | 6.84474  |
| ILF3-AS1    | 2.55123  | 2.44105  | 1.7995    | 2.01014   | 2.68621    | 2.05486  |
| ILK         | 5.46244  | 5.59029  | 4.83234   | 5.39894   | 4.87849    | 5.24017  |
| ILKAP       | 3.65957  | 3.59243  | 3.07622   | 3.14384   | 3.37036    | 3.37011  |
| ILVBL       | 3.75213  | 3.65089  | 2.97887   | 3.35878   | 3.88851    | 4.54476  |
| IMMP1L      | 1.28965  | 1.3251   | 1.69303   | 1.67257   | 2.02971    | 2.40182  |
| IMMP2L      | 3.78876  | 3.44554  | -0.568612 | -0.823182 | 0.815493   | 1.30456  |
| IMMT        | 6.19293  | 6.22491  | 5.61708   | 5.97941   | 6.32997    | 6.39869  |
| IMMTP1      | 1.3414   | 1.37335  | 0.904496  | 1.20451   | 1.52038    | 1.26033  |
| IMP3        | 4.36432  | 4.37473  | 3.36994   | 3.77022   | 4.5634     | 4.80303  |
| IMP4        | 5.27753  | 5.19223  | 3.87446   | 4.35674   | 5.26863    | 5.50394  |
| IMPA1       | 3.35892  | 3.64306  | 2.8193    | 3.49851   | 4.63315    | 5.14815  |
| IMPA2       | 2.93392  | 2.55119  | 2.4422    | 2.44961   | 2.76806    | 2.5925   |
| IMPACT      | 3.9147   | 3.91435  | 3.19369   | 3.68874   | 2.50461    | 2.90432  |
| IMPAD1      | 6.82029  | 6.86021  | 6.709     | 6.98409   | 6.51367    | 6.22771  |
| IMPDH1      | 4.5305   | 4.50615  | 3.85714   | 4.22595   | 3.70604    | 3.82652  |
| IMPDH2      | 6.60367  | 6.75342  | 5.26045   | 5.82779   | 7.41491    | 7.78354  |
| INADL       | 3.61946  | 3.62859  | 3.91319   | 3.99314   | 4.09957    | 4.07628  |
| INAFM2      | 1.28396  | 1.31856  | 0.156448  | 0.591699  | 1.51964    | 0.878317 |
| INCENP      | 5.5408   | 5.53749  | 4.79947   | 5.04091   | 4.63316    | 4.07629  |
| INE1        | 0.567789 | 0.635262 | 0.416483  | 0.0811214 | -1.20056   | -1.79933 |
| INF2        | 4.41206  | 4.08018  | 3.68375   | 3.70013   | 2.90385    | 2.93715  |
| ING1        | 2.82778  | 2.62874  | 2.74627   | 2.66438   | 2.67786    | 2.26202  |
| ING2        | 1.61837  | 1.53719  | 1.86635   | 2.09087   | 2.17576    | 2.03478  |
| ING3        | 3.34258  | 3.43046  | 2.66511   | 2.97333   | 2.78264    | 3.12618  |
| ING4        | 3.00828  | 2.68691  | 3.07387   | 3.44192   | 3.43904    | 3.97628  |
| ING5        | 3.40526  | 2.97712  | 2.93277   | 2.58567   | 4.03923    | 3.1305   |
| INHBA       | 5.41042  | 6.43726  | 2.2677    | 3.1055    | 1.8711     | 2.18812  |
| INIP        | 3.85454  | 3.8969   | 3.28815   | 3.377     | 4.2593     | 4.12933  |
| INO80       | 4.92649  | 4.93869  | 4.28377   | 4.42032   | 5.1339     | 4.86125  |
| INO80B      | 2.50015  | 2.67047  | 1.51383   | 1.95526   | 2.13612    | 2.39595  |
| INO80B-WBP1 | 2.12485  | 1.53099  | 1.50088   | 1.95305   | 1.95576    | 2.22132  |
| INO80C      | 1.14018  | 1.60774  | 0.386425  | 0.821824  | 0.909612   | 0.719622 |
| INO80D      | 4.83508  | 4.90101  | 4.27865   | 4.19159   | 5.02077    | 4.96055  |
| INO80E      | 4.22295  | 4.08321  | 3.91956   | 4.15568   | 3.95981    | 4.03514  |
| INPP1       | 1.952    | 2.02075  | 2.17844   | 2.67582   | 2.65711    | 2.89321  |
| INPP4A      | 4.33846  | 4.36608  | 4.79446   | 4.8989    | 4.3446     | 3.96216  |
| INPP4B      | 5.00785  | 4.93268  | 2.91451   | 2.89961   | -4.65668 ? |          |
| INPP5A      | 3.03437  | 2.81398  | 2.39298   | 2.8151    | 3.87158    | 3.78313  |
| INPP5B      | 3.91747  | 3.80627  | 3.6729    | 3.95321   | 4.19221    | 3.81488  |
| INPP5E      | 1.48086  | 1.46201  | 1.71133   | 1.79207   | 1.9359     | 1.75275  |
| INPP5F      | 6.38918  | 6.44399  | 3.94319   | 4.26186   | 5.82551    | 5.64905  |
| INPP5K      | 3.37104  | 3.34934  | 2.80233   | 3.11276   | 4.01828    | 4.26338  |
| INPPL1      | 5.87219  | 5.62062  | 5.45128   | 5.57547   | 5.26002    | 4.96128  |
| INSIG1      | 5.85025  | 5.94924  | 6.66172   | 7.14256   | 6.62874    | 7.67816  |
| INSIG2      | 3.10506  | 3.43803  | 2.89863   | 3.1603    | 3.99342    | 4.05981  |
| INSR        | 4.85214  | 4.76536  | 2.74129   | 2.83076   | 2.1112     | 1.54125  |
| INTS1       | 5.04743  | 4.83463  | 5.34492   | 5.40045   | 5.07354    | 5.30868  |
| INTS10      | 4.98127  | 5.11031  | 4.2759    | 4.66348   | 4.11776    | 4.65851  |
| INTS12      | 2.59469  | 2.5239   | 2.61386   | 3.06579   | 2.91122    | 3.31701  |
| INTS2       | 4.84587  | 4.74719  | 4.53415   | 4.53321   | 4.84846    | 4.39     |
| INTS3       | 5.36085  | 5.21228  | 5.16637   | 5.01979   | 5.11624    | 4.72668  |

|             |          |            |           |          |          |           |
|-------------|----------|------------|-----------|----------|----------|-----------|
| INTS4       | 4.89522  | 5.04696    | 4.15716   | 4.3418   | 3.63143  | 3.90125   |
| INTS5       | 3.71243  | 3.61664    | 3.20665   | 3.54067  | 3.22386  | 3.25039   |
| INTS6       | 5.70108  | 5.64302    | 6.03678   | 5.98984  | 5.9324   | 5.65641   |
| INTS6P1     | 1.36685  | 1.45532    | 1.4758    | 1.51517  | 1.66552  | 1.66102   |
| INTS7       | 4.32258  | 4.36845    | 4.13953   | 4.39896  | 4.21005  | 4.53884   |
| INTS8       | 4.30482  | 4.23492    | 4.91067   | 5.11694  | 4.75614  | 5.03283   |
| INTS9       | 2.98041  | 2.79926    | 2.98641   | 3.19724  | 2.88079  | 2.66833   |
| INTU        | 2.85359  | 2.83178    | -6.17309  | -6.09892 | 3.33262  | 2.80505   |
| INVS        | 3.81661  | 3.75512    | 3.93151   | 4.02045  | 2.96175  | 2.84788   |
| IP6K1       | 4.9839   | 4.8859     | 4.33118   | 4.56446  | 5.52948  | 5.17438   |
| IP6K2       | 4.05329  | 3.89581    | 4.82979   | 4.95388  | 4.70873  | 4.53049   |
| IPMK        | 2.95727  | 2.9423     | 3.62543   | 3.80107  | 3.82849  | 3.1819    |
| IPO11       | 4.56763  | 4.65442    | 4.72394   | 5.07555  | 4.7391   | 5.0625    |
| IPO13       | 4.60527  | 4.4986     | 4.61333   | 4.9239   | 4.64859  | 4.36072   |
| IPO4        | 4.7904   | 4.69869    | 2.97725   | 3.13832  | 4.91374  | 4.79548   |
| IPO5        | 7.20703  | 7.29057    | 6.37129   | 6.7365   | 6.7211   | 7.00732   |
| IPO5P1      | 1.24348  | 1.10707    | 2.05967   | 1.97335  | 1.5246   | 1.18815   |
| IPO7        | 6.21154  | 6.23148    | 6.79645   | 7.13339  | 7.72953  | 7.76998   |
| IPO7P1      | 0.75867  | 1.09043    | 1.30986   | 1.89919  | 2.57703  | 2.27497   |
| IPO7P2      | 2.78642  | 2.87671    | 3.24584   | 3.62612  | 4.17161  | 4.4145    |
| IPO8        | 5.41565  | 5.43912    | 4.55795   | 4.77073  | 4.87351  | 5.12775   |
| IPO8P1      | 2.02357  | 2.04642    | 2.54838   | 2.9239   | 3.37062  | 3.37473   |
| IPO9        | 6.79049  | 6.9619     | 6.4474    | 6.73854  | 6.45108  | 6.50396   |
| IPP         | 2.43792  | 2.36371    | 3.41453   | 3.51323  | 2.6774   | 2.92629   |
| IPPK        | 4.07851  | 3.97487    | 2.9288    | 3.1713   | 4.05548  | 3.6582    |
| IQCB1       | 3.28775  | 3.16788    | 2.55434   | 2.71438  | 3.04687  | 3.22993   |
| IQCC        | 2.19625  | 2.23637    | 2.13866   | 2.17403  | 2.23     | 1.78962   |
| IQCE        | 2.48084  | 2.46791    | 3.97382   | 4.16845  | 3.07101  | 2.64644   |
| IQCG        | 2.52734  | 2.93162    | 2.8305    | 3.10306  | 5.85612  | 6.22214   |
| IQCH        | 0.51789  | 0.616424   | 0.99492   | 1.03701  | 0.162867 | 0.87998   |
| IQCH-AS1    | 1.16662  | 1.40619    | 0.851655  | 0.555031 | 0.508307 | 1.06006   |
| IQCJ-SCHIP1 | 2.80958  | 2.90055    | 2.36328   | 2.77555  | 4.49308  | 4.47078   |
| IQCK        | 0.580136 | 0.865705   | 0.931502  | 1.24351  | 0.470126 | 0.56699   |
| IQGAP1      | 7.90315  | 7.96167    | 7.6694    | 8.0958   | 8.57924  | 8.61394   |
| IQGAP2      | 1.23761  | 1.3764     | 6.32598   | 6.45793  | 0.258664 | -0.280287 |
| IQGAP3      | 6.26637  | 6.22164    | 4.73978   | 5.07169  | 5.84345  | 5.25908   |
| IQSEC1      | -2.17488 | -2.6546    | 2.78516   | 2.47615  | 1.40582  | 1.22407   |
| IQSEC2      | 0.367103 | -0.177293  | 2.38635   | 2.81004  | 0.458718 | 0.878317  |
| IRAK1       | 6.00304  | 5.94337    | 5.59904   | 6.07232  | 7.51272  | 7.87863   |
| IRAK1BP1    | 3.08309  | 3.28535    | -0.571714 | -1.3793  | 2.48171  | 2.56556   |
| IRAK2       | 3.82349  | 4.04693    | 2.60112   | 3.15327  | 2.29681  | 2.41742   |
| IRAK4       | 2.50551  | 2.56783    | 3.13841   | 3.5187   | 2.87886  | 3.30451   |
| IREB2       | 5.95868  | 5.90263    | 5.88288   | 5.90414  | 6.29784  | 6.17782   |
| IRF1        | 3.53932  | 3.84322    | 5.76337   | 6.10488  | 3.47411  | 3.70268   |
| IRF2        | 3.3412   | 3.45303    | 3.59455   | 3.97465  | 3.21928  | 3.35668   |
| IRF2BP1     | 3.13697  | 3.03101    | 1.71737   | 2.02562  | 3.08789  | 3.32119   |
| IRF2BP2     | 5.17489  | 5.28614    | 5.32865   | 5.45119  | 5.51028  | 5.43278   |
| IRF2BPL     | 3.74424  | 3.38813    | 3.58668   | 3.34026  | 3.70113  | 3.35303   |
| IRF3        | 3.1623   | 2.90324    | 3.67075   | 4.07917  | 3.50369  | 3.62016   |
| IRF7        | 0.255223 | -0.0703893 | 1.26773   | 1.33416  | -1.65987 | -1.70626  |
| IRF9        | 2.05603  | 2.035      | 2.61536   | 2.70794  | 4.14815  | 4.19557   |
| IRGQ        | 5.57731  | 5.51516    | 4.67523   | 4.88052  | 5.72985  | 4.97189   |



|            |            |            |           |            |            |            |
|------------|------------|------------|-----------|------------|------------|------------|
| IRS1       | 3.32606    | 2.98837    | 4.13727   | 4.36993    | 4.99789    | 5.06724    |
| IRS2       | 3.51646    | 3.40493    | 1.77207   | 2.05107    | 3.25335    | 3.12618    |
| IRX1       | -2.23898   | -2.21426   | 0.849967  | 0.749225   | 3.78055    | 3.52211    |
| IRX2       | 1.16516    | 0.746683   | 1.11115   | 0.924662 ? | ?          |            |
| IRX3       | 1.17375    | 1.10269    | 1.24216   | 1.12275    | 1.52888    | 0.977185   |
| ISCA1      | 3.83759    | 3.72889    | 2.83409   | 3.06961    | 4.21597    | 4.37844    |
| ISCA1P1    | 1.6764     | 1.52412    | 0.4804    | 0.628288   | 1.82731    | 2.43331    |
| ISCA2      | 2.61143    | 2.45305    | 2.03567   | 2.40294    | 2.51712    | 3.31558    |
| ISCU       | 4.3494     | 4.46195    | 3.78514   | 4.39001    | 4.3425     | 4.8773     |
| ISG15      | -0.255978  | -0.0197685 | 2.34397   | 2.46104    | 3.81946    | 4.47194    |
| ISG20      | 0.768595   | 0.988427   | 0.371169  | 1.1104     | -0.660096  | -1.31405   |
| ISG20L2    | 5.16804    | 5.27982    | 3.70082   | 3.85752    | 5.22413    | 5.33705    |
| ISL2       | 0.621131   | 0.488895   | 0.0427984 | 0.306437   | 0.285071   | -0.253125  |
| ISLR       | 0.323393   | 1.43201    | 0.156448  | 0.491176   | -0.637731  | 0.50283    |
| ISOC1      | 3.91747    | 4.03501    | 3.00631   | 3.16963    | 2.84749    | 3.05484    |
| ISOC2      | 2.20783    | 2.04497    | 3.30432   | 3.83516    | 3.40039    | 4.21512    |
| IST1       | 5.35796    | 5.33376    | 5.76994   | 5.99136    | 6.49792    | 6.40803    |
| ISY1       | 4.02966    | 4.0967     | 3.21684   | 3.56019    | 3.97103    | 4.21377    |
| ISY1-RAB43 | 3.04287    | 2.70878    | 4.55145   | 4.71488    | 4.02404    | 3.72066    |
| ISYNA1     | 2.5574     | 2.03245    | 0.940174  | 0.773076   | -1.1236    | -2.40762   |
| ITCH       | 6.35771    | 6.38828    | 6.18605   | 6.47073    | 5.83352    | 6.05692    |
| ITFG1      | 4.56221    | 4.53491    | 4.89254   | 5.20212    | 5.79132    | 6.32598    |
| ITFG2      | 3.1609     | 2.96086    | 2.7812    | 2.7418     | 2.83089    | 2.342      |
| ITFG3      | 3.15902    | 2.54882    | 4.91193   | 4.76124    | 4.3002     | 4.24534    |
| ITGA1      | 4.70382    | 4.81735    | 4.9509    | 5.32248    | -0.60452   | -0.0622413 |
| ITGA10     | -0.0842313 | -0.214764  | 1.29226   | 1.53313    | -2.48959   | -2.24661   |
| ITGA11     | 0.567789   | 0.727049   | 5.23379   | 5.22433    | -0.200727  | -0.619042  |
| ITGA2      | 6.27895    | 6.72811    | 6.73537   | 7.22305    | 5.68259    | 5.77457    |
| ITGA3      | 7.84253    | 8.44325    | 7.16743   | 7.71659    | 7.88129    | 8.20868    |
| ITGA4      | 6.62084    | 6.5189     | 3.70978   | 3.85407    | 5.19027    | 5.40702    |
| ITGA5      | 7.52963    | 7.83233    | 6.59286   | 7.04044    | 5.29168    | 5.55948    |
| ITGA6      | 8.15601    | 8.09784    | 6.48032   | 7.16033    | 6.37989    | 6.46217    |
| ITGA7      | 1.55835    | 1.41984    | -1.2763   | -1.06415   | 1.15352    | 1.68564    |
| ITGA9      | 4.046      | 3.48325    | -0.748505 | -0.52367   | 5.78928    | 5.93575    |
| ITGA9-AS1  | 0.766103   | 0.722641   | -0.945035 | -0.716287  | 0.522267   | -0.493861  |
| ITGAE      | 2.60927    | 2.49427    | 2.80517   | 3.10307    | 2.91712    | 3.89505    |
| ITGAV      | 8.13912    | 8.25835    | 7.46553   | 7.59236    | 7.91048    | 7.80109    |
| ITGAX      | -5.69162   | -4.87366   | 3.63985   | 3.93008    | -6.64581 ? |            |
| ITGB1      | 9.09507    | 9.00168    | 8.45361   | 8.39053    | 8.83447    | 8.79666    |
| ITGB1BP1   | 4.31938    | 4.29162    | 3.913     | 4.33743    | 5.29521    | 5.61947    |
| ITGB1P1    | 6.40161    | 6.24027    | 5.80501   | 5.6131     | 6.05854    | 6.22543    |
| ITGB3      | 8.81823    | 9.01861    | 4.41      | 5.10003    | 5.57938    | 5.31897    |
| ITGB3BP    | 3.79986    | 3.78241    | 4.12456   | 4.31043    | 3.3565     | 4.40572    |
| ITGB4      | 0.61388    | 0.382745   | -0.138983 | -0.464785  | 7.241      | 7.5916     |
| ITGB5      | 6.01019    | 5.71673    | 5.28562   | 5.41031    | 5.49419    | 5.42771    |
| ITGB8      | 9.28403    | 8.9763     | 5.40892   | 5.0088     | 8.46247    | 8.34024    |
| ITGBL1     | -3.85083   | -3.33921   | 4.22893   | 5.10739    | 2.51427    | 2.96624    |
| ITIH6      | 2.09536    | 1.53154 ?  | ?         |            | -6.64581   | -5.69922   |
| ITM2B      | 5.82912    | 5.84776    | 6.08033   | 6.30241    | 7.70361    | 7.60188    |
| ITM2C      | 6.6521     | 6.35332    | 6.33925   | 6.34314    | 5.3446     | 5.32463    |
| ITPA       | 3.53574    | 3.39513    | 3.25735   | 3.55652    | 3.88465    | 4.44937    |
| ITPK1      | 5.21342    | 5.38228    | 1.80519   | 2.72407    | 4.00146    | 4.45063    |

|               |          |           |            |            |           |           |
|---------------|----------|-----------|------------|------------|-----------|-----------|
| ITPK1-AS1     | 1.33988  | 1.23764   | -2.18288   | -0.979274  | -1.57243  | -2.00571  |
| ITPKB         | 3.16511  | 3.29705   | 3.08795    | 3.0611     | 4.06591   | 4.03811   |
| ITPKC         | 2.60927  | 2.57608   | 3.01124    | 3.16963    | 3.22691   | 3.31566   |
| ITPR1         | 4.12508  | 4.53361   | 4.63744    | 5.04273    | 5.44819   | 5.07464   |
| ITPR2         | 5.82104  | 5.72541   | 6.57491    | 6.48082    | 4.24131   | 3.92627   |
| ITPR3         | 6.01819  | 6.01001   | 5.24581    | 5.55783    | 4.62341   | 4.79837   |
| ITPRIP        | 4.02459  | 4.20249   | 4.21735    | 4.66017    | 3.40443   | 3.12618   |
| ITPRIPL1      | 2.29812  | 2.56507   | 0.699196   | 1.04098    | -4.07293  | -4.70296  |
| ITPRIPL2      | 5.59016  | 5.58608   | 5.01915    | 5.03121    | 4.86673   | 4.59359   |
| ITSN1         | 4.2768   | 4.22439   | 5.35384    | 5.54275    | 4.22972   | 4.01267   |
| ITSN2         | 5.1877   | 5.23016   | 4.61163    | 4.71906    | 5.30326   | 5.41157   |
| IVD           | 4.26309  | 4.07437   | 4.10072    | 4.33307    | 3.78676   | 3.78313   |
| IVNS1ABP      | 6.14227  | 6.13357   | 5.3811     | 5.50725    | 6.09038   | 6.29187   |
| IWS1          | 5.36984  | 5.21594   | 4.91966    | 4.96624    | 5.56174   | 5.00132   |
| JADE1         | 4.83474  | 4.99907   | 4.57867    | 4.62164    | 5.21542   | 5.21809   |
| JADE2         | 5.30161  | 5.42169   | 5.12082    | 5.44432    | 5.60881   | 5.79163   |
| JADE3         | 3.6363   | 3.80861   | 3.17842    | 3.1858     | 2.99791   | 2.5925    |
| JAG1          | 5.1014   | 5.62164   | 3.80516    | 4.20292    | 7.23742   | 6.50822   |
| JAGN1         | 4.46896  | 4.29037   | 3.48536    | 3.77991    | 4.08368   | 4.30451   |
| JAK1          | 6.58414  | 6.57674   | 6.69623    | 7.05418    | 6.46524   | 6.78837   |
| JAK2          | 2.58864  | 2.82487   | 2.96114    | 3.43033    | 3.55643   | 3.59707   |
| JAKMIP2       | 2.93574  | 3.05288   | -2.58563   | -1.95998   | 2.06182   | 3.11843   |
| JAKMIP3       | -3.8896  | -3.65369  | 3.02846    | 2.73864    | 3.44792   | 1.84021   |
| JAM2          | 0.567789 | 0.813344  | 2.0405     | 1.99449    | -2.65941  | -3.12051  |
| JAM3          | 6.08051  | 6.025     | 4.61522    | 4.96104    | 5.71205   | 5.71906   |
| JARID2        | 5.10905  | 4.93105   | 4.25527    | 4.25422    | 5.23068   | 4.59477   |
| JAZF1         | 1.63485  | 1.83344   | 3.02133    | 3.14125    | 2.72673   | 3.24399   |
| JDP2          | -2.37642 | -2.46206  | 1.53076    | 2.01532    | 0.0122397 | 0.126299  |
| JKAMP         | 4.73502  | 4.55117   | 4.3302     | 4.64268    | 5.2492    | 5.64697   |
| JMJD1C        | 5.90306  | 5.74361   | 5.79399    | 5.68637    | 6.12402   | 5.90691   |
| JMJD4         | 3.60837  | 3.59211   | 3.39208    | 3.6365     | 3.14037   | 3.29007   |
| JMJD6         | 4.64532  | 4.56368   | 3.94189    | 4.20065    | 4.8655    | 4.41351   |
| JMJD7         | 0.906106 | 0.708081  | 0.810986   | 0.899354   | 0.391999  | 1.3453    |
| JMJD7-PLA2G4B | 2.13154  | 2.09551   | 2.88935    | 2.75073    | 2.62034   | 1.90972   |
| JMJD8         | 4.8516   | 4.63899   | 4.71484    | 4.90755    | 4.51452   | 4.29645   |
| JMY           | 3.93209  | 4.0139    | 3.5478     | 3.5864     | 4.58702   | 4.53288   |
| JOSD1         | 5.09045  | 5.26251   | 4.82909    | 5.26892    | 5.14784   | 5.13563   |
| JOSD2         | 0.146525 | -0.292758 | -0.0541032 | -0.0642959 | 0.706084  | 1.73626   |
| JPH1          | 2.93937  | 3.06659   | -0.138983  | -0.493926  | 0.293994  | -0.280286 |
| JPH2          | -4.11163 | -3.87578  | 1.09265    | 1.77384    | 1.99792   | 1.56945   |
| JPX           | 3.16351  | 3.1032    | 3.80588    | 3.91946    | 3.84684   | 3.65137   |
| JRK           | 4.42737  | 4.3413    | 4.47828    | 4.60033    | 3.86092   | 3.19088   |
| JRKL          | 2.45575  | 2.64569   | 3.49243    | 3.65273    | 2.74484   | 2.62869   |
| JTB           | 5.39102  | 5.49746   | 4.27078    | 4.86987    | 5.53501   | 6.21849   |
| JUN           | 4.40092  | 4.43045   | 4.25734    | 4.85551    | 5.76909   | 5.60048   |
| JUNB          | 2.95556  | 2.68182   | 1.74725    | 2.32164    | 2.58763   | 2.78114   |
| JUND          | 2.72719  | 2.1445    | 1.71133    | 1.76772    | 4.40038   | 3.70055   |
| JUP           | ?        | ?         | 1.27595    | 1.55654    | 2.16625   | 2.22994   |
| KALRN         | 2.12122  | 1.45008   | 3.02629    | 2.81302    | -1.37455  | -1.79933  |
| KANK1         | 4.19648  | 3.93268   | 5.95025    | 6.06171    | 5.86887   | 5.77715   |
| KANK2         | 3.63295  | 3.46048   | 4.99327    | 4.97929    | 4.92229   | 4.65742   |
| KANSL1        | 5.49336  | 5.32356   | 5.87291    | 5.72206    | 4.9821    | 4.64844   |

|              |           |            |            |            |            |           |
|--------------|-----------|------------|------------|------------|------------|-----------|
| KANSL1L      | 3.88093   | 3.93148    | 4.2933     | 4.39399    | 3.95621    | 3.92882   |
| KANSL2       | 3.6986    | 3.6522     | 3.88525    | 3.98128    | 3.34391    | 3.43795   |
| KANSL3       | 5.22311   | 5.17378    | 4.91713    | 5.05607    | 5.47761    | 5.59648   |
| KANTR        | 1.44068   | 1.29657    | 0.891886   | 1.02402    | 0.645324   | -0.881925 |
| KARS         | 6.50607   | 6.53961    | 5.95384    | 6.5251     | 6.18556    | 6.70234   |
| KARSP1       | 0.255223  | 0.432061   | -0.183372  | 0.430424   | 0.0402612  | -0.497071 |
| KAT2A        | 3.83095   | 3.56075    | 4.19691    | 4.00697    | 4.19919    | 3.6122    |
| KAT2B        | 5.11468   | 4.36211    | 3.82771    | 3.71771    | 4.96173    | 4.97452   |
| KAT5         | 4.06734   | 4.00382    | 2.77159    | 3.02049    | 3.49229    | 3.74757   |
| KAT6A        | 5.85454   | 5.92112    | 5.66314    | 5.76114    | 5.11693    | 4.82952   |
| KAT6B        | 3.1179    | 2.72698    | 4.08911    | 3.87558    | 4.86961    | 4.1698    |
| KAT7         | 5.33017   | 5.42717    | 4.93612    | 5.25907    | 4.82213    | 4.77577   |
| KAT8         | 3.21978   | 3.13707    | 3.04289    | 3.2399     | 3.70492    | 3.22403   |
| KATNA1       | 2.6206    | 2.54839    | 2.30433    | 2.43808    | 3.21006    | 3.34857   |
| KATNAL1      | 4.56183   | 4.6066     | 4.62383    | 5.02109    | 4.8856     | 4.7185    |
| KATNAL2      | 2.51282   | 2.51731    | 1.75315    | 1.73669    | -0.43131   | -1.18284  |
| KATNB1       | 3.31494   | 2.99249    | 3.20018    | 3.65273    | 4.441      | 4.52571   |
| KATNBL1      | 3.63053   | 3.84277    | 3.45109    | 3.56487    | 3.33587    | 3.70636   |
| KATNBL1P6    | 1.09644   | 1.3914     | 0.532297   | 0.837055   | 0.805012   | 1.88771   |
| KAZALD1      | 2.0083    | 1.74176    | 1.0357     | 0.761609   | -0.200727  | -0.38461  |
| KAZN         | -0.129199 | -0.0185039 | 0.723445   | 1.32383    | 1.69109    | 1.28202   |
| KB-1208A12.3 | 3.75985   | 3.83977    | 3.46447    | 4.01729    | 4.26694    | 5.41535   |
| KB-1460A1.5  | -0.323873 | -0.036446  | -0.161006  | 0.563685   | 0.679613   | 0.0213376 |
| KB-1572G7.2  | 2.46262   | 2.38338    | 2.22988    | 2.19468    | 0.903324   | -0.17222  |
| KB-431C1.5   | 0.278306  | -0.120595  | 1.01783    | 0.903293   | -0.0163223 | -0.4586   |
| KBTBD2       | 5.33018   | 5.42932    | 5.17127    | 5.33567    | 5.29897    | 5.42835   |
| KBTBD3       | -0.547721 | -0.25044   | 1.2174     | 1.24116    | 0.816395   | 1.76092   |
| KBTBD4       | 3.30122   | 3.14991    | 3.05889    | 3.29882    | 3.82909    | 4.05096   |
| KBTBD6       | 4.25721   | 4.55493    | 3.56716    | 3.91493    | 4.21223    | 4.25191   |
| KBTBD7       | 3.48966   | 3.38984    | 3.37397    | 3.46292    | 3.44188    | 3.36461   |
| KBTBD8       | 2.69967   | 2.53152    | 1.45314    | 1.43811    | 1.91714    | 2.42258   |
| KC6          | 2.37775   | 2.49136    | -5.1783    | -6.09892   | -6.64581   | -5.69922  |
| KCMF1        | 5.05246   | 5.02699    | 4.8249     | 5.22656    | 5.361      | 5.3533    |
| KCNA2        | 1.76447   | 1.65093    | -4.18092   | -3.52222 ? |            | -5.69922  |
| KCNAB1       | 1.49565   | 1.95118    | 1.79388    | 1.99972    | 0.93937    | 0.474306  |
| KCNAB2       | 0.930336  | 0.894767   | 3.0501     | 3.51323    | 2.32554    | 1.89323   |
| KCNAB3       | 1.74389   | 1.43806    | 0.27602    | 0.158078   | -0.338214  | -1.61882  |
| KCNC4        | 2.92298   | 3.43953    | 0.340141   | 0.798133   | -2.85193   | -3.70484  |
| KCND1        | 1.61384   | 0.912259   | 1.83887    | 1.38307    | -1.95932   | -2.70579  |
| KCNE4        | 0.440559  | 0.181128   | 5.66978    | 5.68233    | 4.18361    | 3.61522   |
| KCNG1        | 3.49838   | 3.56085    | 0.686917   | 0.798133   | -5.65305 ? |           |
| KCNH1        | 1.5991    | 1.71068    | -0.962089  | -0.792822  | -3.78453   | -2.24816  |
| KCNH2        | ?         | -5.45651   | 0.711372   | 1.24877    | -6.64581 ? |           |
| KCNH5        | 2.93574   | 2.93804    | -6.17309 ? |            | -1.80184   | -0.183001 |
| KCNIP3       | 0.768595  | 0.840999   | 0.759062   | 0.902467   | 0.519683   | 1.12623   |
| KCNIP4       | 1.65027   | 1.64433    | 0.610974   | 0.28359    | 1.64653    | 1.57817   |
| KCNIP4-IT1   | 4.10424   | 4.17286 ?  |            | -3.78492   | 2.89812    | 2.64644   |
| KCNJ13       | 1.84508   | 1.86831    | 2.46193    | 2.17536    | 1.76874    | 1.2539    |
| KCNJ14       | 1.08953   | 0.936259   | -0.471995  | -0.380164  | 0.551344   | 0.127792  |
| KCNJ2        | -0.676496 | -1.14061   | 3.19123    | 3.11035    | 4.05048    | 3.24748   |
| KCNK1        | ?         | ?          | 0.699196   | 1.10068    | -1.85245   | -2.00571  |
| KCNK5        | 2.96804   | 2.94655    | -5.1783    | -6.09892   | -6.64581 ? |           |

|            |            |           |           |           |            |           |
|------------|------------|-----------|-----------|-----------|------------|-----------|
| KCNMA1     | 4.74049    | 5.46928   | 4.50838   | 5.10132   | 5.40004    | 5.80307   |
| KCNMA1-AS1 | 1.09207    | 1.77653   | 1.08146   | 1.32456   | 0.831974   | 0.401084  |
| KCNMB3     | 0.211859   | 0.153676  | 1.19404   | 0.842609  | 1.44068    | 0.59343   |
| KCNMB4     | 1.74389    | 1.41371   | -1.05395  | -1.78641  | 0.597155   | -0.348991 |
| KCNN3      | 5.04787    | 5.30577   | -0.69145  | 0.317536  | -5.07051   | -3.12051  |
| KCNN4      | 5.19649    | 5.4946    | 2.96114   | 3.27272   | 4.40845    | 4.25762   |
| KCNQ1OT1   | 9.93594    | 9.734     | 7.34823   | 7.05402   | 6.03312    | 5.67345   |
| KCNQ5      | 3.70073    | 3.62063   | -6.17309  | -6.09892  | 3.40174    | 3.2677    |
| KCNRG      | 1.2357     | 1.56891   | 1.27715   | 1.13162   | 1.82346    | 1.69141   |
| KCNS2      | 0.367103   | -0.214763 | 0.488988  | 0.100749  | 0.197777   | 0.0213376 |
| KCNS3      | 4.31634    | 4.9013    | 0.208904  | 1.55655   | 0.597164   | 1.50278   |
| KCNT2      | 1.52013    | 1.06859   | -0.428455 | -0.823182 | 0.578176   | 1.25912   |
| KCNV2      | -0.549135  | -0.27286  | -1.42826  | -1.71605  | 1.26455    | 0.965773  |
| KCTD1      | 2.57706    | 2.59192   | 2.35177   | 2.4799    | 1.85891    | 1.75275   |
| KCTD10     | 5.05432    | 4.99858   | 5.06309   | 5.23185   | 4.95016    | 4.7619    |
| KCTD11     | 1.7968     | 1.73686   | 2.36724   | 2.72723   | 2.15669    | 1.92993   |
| KCTD12     | 1.88966    | 2.08021   | 4.76411   | 4.35162   | 5.9326     | 5.16749   |
| KCTD13     | 2.24231    | 2.4329    | 1.77418   | 1.81168   | 1.2071     | 1.0747    |
| KCTD14     | -3.91265   | -3.03182  | 1.58472   | 1.9097    | -3.77088   | -3.38849  |
| KCTD15     | 3.84298    | 3.55952   | 3.52211   | 3.54402   | 3.97268    | 3.75272   |
| KCTD17     | 2.03903    | 2.24798   | 2.36339   | 2.9301    | 1.72774    | 2.31011   |
| KCTD18     | 2.48581    | 2.6587    | 2.46754   | 2.69531   | 2.71908    | 2.96925   |
| KCTD2      | 3.38174    | 3.52015   | 3.99264   | 4.48828   | 4.83053    | 5.20915   |
| KCTD20     | 6.03479    | 6.24668   | 5.93185   | 6.45842   | 6.96351    | 7.30403   |
| KCTD21     | 2.6996     | 3.01135   | 2.43326   | 2.91362   | 2.43226    | 2.59344   |
| KCTD21-AS1 | 2.85941    | 3.04051   | 1.02051   | 1.16711   | -0.571088  | -0.585622 |
| KCTD3      | 5.72035    | 5.74633   | 4.64302   | 5.02109   | 5.43246    | 5.60504   |
| KCTD4      | -0.0550876 | -0.604659 | 0.914572  | 1.43811   | 0.679613   | 0.816919  |
| KCTD5      | 3.61143    | 3.47725   | 3.65634   | 4.00758   | 3.87658    | 3.99342   |
| KCTD6      | 2.80077    | 2.73928   | 1.78229   | 2.03586   | 2.65259    | 2.55539   |
| KCTD7      | 2.8584     | 2.92462   | 2.93891   | 2.99571   | 3.36859    | 3.38598   |
| KCTD9      | 4.69672    | 4.72892   | 4.19488   | 4.66142   | 4.88623    | 4.75307   |
| KCTD9P1    | -0.0824705 | -0.411708 | 1.12269   | 1.52156   | 2.41459    | 2.34071   |
| KCTD9P2    | 0.675708   | 0.788945  | -0.13983  | 0.658975  | 0.81487    | 0.913286  |
| KCTD9P4    | 0.917554   | 0.450728  | 0.385508  | 0.865966  | 0.915919   | 0.892445  |
| KDELC1     | 3.71337    | 3.40133   | 3.58796   | 3.60713   | 3.1789     | 3.49027   |
| KDELC1P1   | 0.221209   | 0.603321  | 0.558032  | 0.317536  | -0.0752099 | -0.211608 |
| KDELC2     | 4.5435     | 4.2803    | 6.52775   | 6.63008   | 5.05221    | 4.9043    |
| KDELR1     | 5.21228    | 5.10318   | 5.80761   | 5.93355   | 5.73545    | 5.82075   |
| KDELR2     | 6.84618    | 6.81272   | 7.42315   | 7.61938   | 6.999      | 6.76522   |
| KDELR3     | 4.23976    | 4.28114   | 3.69606   | 4.2432    | 2.77015    | 3.59249   |
| KDM1A      | 6.43391    | 6.45749   | 5.53201   | 5.84972   | 5.80089    | 5.93397   |
| KDM1B      | 3.23461    | 3.435     | 2.12484   | 2.55296   | 3.61348    | 4.01438   |
| KDM2A      | 5.67976    | 5.64598   | 5.83675   | 5.96863   | 5.35684    | 4.84595   |
| KDM2B      | 4.16735    | 4.03967   | 3.67655   | 3.61308   | 3.83747    | 3.02722   |
| KDM3A      | 4.98301    | 4.9062    | 4.97823   | 4.76154   | 5.96515    | 5.58157   |
| KDM3B      | 5.81566    | 5.77708   | 5.9589    | 6.04535   | 5.97177    | 5.75322   |
| KDM4A      | 4.94052    | 4.80768   | 5.26262   | 5.43713   | 4.96154    | 4.61108   |
| KDM4A-AS1  | 0.843132   | 0.609689  | 0.994601  | 1.20345   | 0.251483   | -0.816433 |
| KDM4B      | 2.69753    | 2.48845   | 3.25942   | 3.26839   | 4.18518    | 3.64643   |
| KDM4C      | 4.017      | 4.07587   | 3.64313   | 3.72203   | 5.27204    | 4.74187   |
| KDM5A      | 6.76026    | 6.69285   | 6.53858   | 6.69755   | 6.23718    | 6.08493   |

|           |           |               |           |           |            |            |
|-----------|-----------|---------------|-----------|-----------|------------|------------|
| KDM5B     | 5.99699   | 6.21467       | 5.97477   | 6.19725   | 5.21429    | 5.16826    |
| KDM5C     | 5.90453   | 5.88864       | 5.33561   | 5.61354   | 5.57602    | 5.17516    |
| KDM5D     | -6.68418  | -6.45019      | 4.63905   | 4.62163   | -5.65305 ? |            |
| KDM6A     | 4.29527   | 4.15553       | 2.77358   | 2.77077   | 4.04532    | 3.31565    |
| KDM6B     | 1.51527   | 1.10707       | 2.74427   | 2.35471   | 1.91714    | 1.17598    |
| KDM7A     | 4.49074   | 4.72575       | 2.759     | 3.02304   | 3.83054    | 4.14503    |
| KDR       | -6.68418  | -4.13839 ?    |           | -6.09892  | 2.24359    | 3.06478    |
| KDSR      | 5.57267   | 5.68752       | 3.95072   | 4.34752   | 3.47924    | 3.56708    |
| KEAP1     | 3.93664   | 3.92624       | 4.17513   | 4.70174   | 4.36414    | 4.77809    |
| KHDC1     | 1.09539   | 0.946604      | -1.37581  | -1.40802  | 2.78057    | 2.48806    |
| KHDRBS1   | 5.98936   | 5.93887       | 5.78187   | 5.77801   | 5.95761    | 5.81489    |
| KHDRBS3   | 4.07406   | 4.25996       | -2.86056  | -2.64851  | 4.72122    | 4.50395    |
| KHK       | 1.84669   | 1.79528       | -1.32519  | -0.709972 | 1.1995     | 1.70699    |
| KHNYN     | 5.20497   | 5.06284       | 4.40711   | 4.45412   | 5.03773    | 4.85088    |
| KHSRP     | 5.37486   | 5.12013       | 4.76621   | 5.01335   | 5.477      | 5.25038    |
| KHSRPP1   | 2.08411   | 1.9174        | 1.56548   | 1.69856   | 2.29379    | 2.02123    |
| KIAA0020  | 5.53992   | 5.46935       | 4.29726   | 4.5278    | 6.51942    | 6.66505    |
| KIAA0040  | 4.28603   | 4.81734       | -1.01332  | -0.52367  | -4.65668   | -5.69922   |
| KIAA0100  | 7.48234   | 7.52193       | 7.19917   | 7.43469   | 8.45151    | 8.35801    |
| KIAA0101  | 4.82945   | 4.73155       | 4.45343   | 4.6043    | 4.83911    | 4.8103     |
| KIAA0141  | 4.71508   | 4.63649       | 4.51778   | 4.64438   | 4.58939    | 4.47195    |
| KIAA0195  | 3.6352    | 3.24624       | 4.60844   | 4.4313    | 4.6053     | 4.38999    |
| KIAA0196  | 4.85796   | 4.86204       | 4.66781   | 5.03589   | 4.59154    | 5.03347    |
| KIAA0226  | 3.33159   | 3.22366       | 3.76776   | 3.93966   | 5.17494    | 5.00236    |
| KIAA0226L | -0.191134 | -0.00302562 ? | ?         |           | 0.549226   | 0.0483059  |
| KIAA0232  | 5.98736   | 5.99216       | 5.77066   | 5.74756   | 5.77925    | 5.39461    |
| KIAA0319  | -1.20691  | -0.292758     | 0.711372  | 0.857026  | 0.782702   | 0.200291   |
| KIAA0319L | 6.05582   | 5.90508       | 5.80728   | 5.84602   | 6.36031    | 6.34345    |
| KIAA0355  | 3.82546   | 3.8523        | 3.95218   | 4.16962   | 4.76909    | 4.65193    |
| KIAA0368  | 6.29669   | 6.38712       | 5.92793   | 6.18984   | 5.99901    | 5.97099    |
| KIAA0391  | 4.46882   | 4.44753       | 3.61128   | 3.93945   | 4.54027    | 4.74531    |
| KIAA0408  | 0.925483  | 1.67661       | -0.12203  | 0.110697  | 3.20615    | 3.42124    |
| KIAA0430  | 4.63072   | 4.66965       | 4.50821   | 4.68313   | 4.58166    | 4.5209     |
| KIAA0513  | 2.98217   | 2.82718       | 3.37107   | 3.80555   | 3.12759    | 3.11983    |
| KIAA0556  | 3.09156   | 3.19292       | 3.63441   | 3.73571   | 3.56546    | 3.40406    |
| KIAA0586  | 4.39053   | 4.42478       | 3.5769    | 4.00859   | 4.23215    | 4.53763    |
| KIAA0753  | 3.66112   | 3.63222       | 4.44557   | 4.40148   | 4.3549     | 4.11843    |
| KIAA0825  | 0.71885   | 0.822624      | 0.0671844 | 0.0811214 | -0.10558   | 1.17598    |
| KIAA0895  | 3.16665   | 3.19192       | 3.08097   | 3.42852   | 3.33548    | 3.35945    |
| KIAA0895L | 2.8136    | 2.46584       | 3.56533   | 3.26446   | 3.6152     | 2.81747    |
| KIAA0907  | 5.77439   | 5.92893       | 5.1231    | 5.54714   | 5.66444    | 5.46633    |
| KIAA0922  | 3.69859   | 3.82139       | 3.65726   | 3.53684   | 3.2866     | 3.27057    |
| KIAA0930  | 4.91516   | 4.82486       | 5.82104   | 6.14707   | 4.60763    | 4.41611    |
| KIAA1024  | 1.59098   | 1.54281       | 1.13845   | 1.32585   | 2.84153    | 2.75273    |
| KIAA1033  | 6.019     | 6.09197       | 5.43071   | 5.75882   | 5.90315    | 6.24854    |
| KIAA1107  | 1.02208   | 0.831845      | 1.98643   | 1.8912    | -0.412205  | -0.0627204 |
| KIAA1109  | 6.57002   | 6.56521       | 7.37191   | 7.43782   | 6.60922    | 6.737      |
| KIAA1143  | 4.84109   | 4.83861       | 4.38417   | 4.70042   | 5.17347    | 5.28885    |
| KIAA1147  | 5.76112   | 6.00373       | 4.89061   | 5.13731   | 6.03556    | 6.24785    |
| KIAA1161  | 2.17438   | 1.92088       | 1.57806   | 1.39901   | 3.16147    | 2.2475     |
| KIAA1191  | 5.01853   | 5.08236       | 5.4064    | 5.8993    | 5.36841    | 5.57587    |
| KIAA1211  | 1.72302   | 1.91656       | -1.53926  | -1.58485  | -1.41201   | -1.89883   |

|           |           |           |          |            |           |           |
|-----------|-----------|-----------|----------|------------|-----------|-----------|
| KIAA1217  | 4.57704   | 4.8156    | 4.18825  | 4.29417    | 3.46639   | 3.13564   |
| KIAA1324L | 5.05706   | 5.52085   | -2.09546 | -3.10759 ? |           | -5.69922  |
| KIAA1328  | 2.01677   | 1.88591   | 2.48183  | 2.37815    | 1.49671   | 1.04823   |
| KIAA1407  | 0.171373  | 0.503023  | 1.57806  | 1.24877    | 0.384182  | -0.706491 |
| KIAA1429  | 5.87197   | 5.9054    | 5.91121  | 6.15034    | 6.06312   | 6.34722   |
| KIAA1462  | 0.45076   | 0.407614  | 5.48402  | 5.37094    | 0.939663  | 0.80115   |
| KIAA1467  | 3.86698   | 3.71707   | 3.52901  | 3.64439    | 2.84551   | 2.25331   |
| KIAA1468  | 4.85214   | 4.88365   | 4.06796  | 4.37296    | 3.41784   | 3.5003    |
| KIAA1522  | 2.95555   | 2.8881    | 2.78803  | 2.87702    | 2.92654   | 2.89692   |
| KIAA1524  | 4.87928   | 5.10794   | 4.75531  | 5.21534    | 4.49639   | 4.9789    |
| KIAA1549  | 4.94882   | 5.36011   | 4.99576  | 4.91215    | 4.90526   | 5.01523   |
| KIAA1549L | 6.58541   | 6.62746   | 1.68687  | 1.8912     | 1.12703   | 0.100762  |
| KIAA1551  | 5.53753   | 5.46712   | 6.63605  | 6.60973    | 4.88125   | 5.14736   |
| KIAA1586  | 3.81493   | 3.82673   | 3.54269  | 3.64487    | 3.82901   | 4.08161   |
| KIAA1614  | 2.33309   | 2.02773   | 2.03313  | 1.7288     | 1.31821   | 0.42663   |
| KIAA1644  | 4.20555   | 4.59919   | 2.99141  | 3.68558    | -4.33548  | -1.18284  |
| KIAA1671  | 0.566464  | 0.206981  | 4.42897  | 3.85987    | 3.51218   | 2.41742   |
| KIAA1715  | 4.84973   | 5.15507   | 5.97348  | 6.27892    | 5.92869   | 5.49724   |
| KIAA1755  | 4.05412   | 3.96026   | -2.37543 | -2.40763   | -4.65668  | -5.69922  |
| KIAA1841  | 2.22674   | 2.11303   | 2.84352  | 2.72436    | 3.20217   | 3.37246   |
| KIAA1919  | 3.44047   | 3.50149   | 3.49948  | 3.49851    | 4.14623   | 3.87637   |
| KIAA1958  | 3.2449    | 3.02901   | 2.97635  | 2.53504    | 4.23146   | 3.73416   |
| KIAA2013  | 4.80377   | 4.7051    | 4.30439  | 4.7169     | 5.94529   | 5.77228   |
| KIAA2018  | 4.20404   | 4.18998   | 4.16188  | 4.30796    | 3.91334   | 4.10546   |
| KIAA2026  | 3.97688   | 3.92301   | 4.26666  | 4.1391     | 5.30619   | 5.073     |
| KIDINS220 | 5.81685   | 5.72603   | 5.83502  | 5.93387    | 6.34704   | 6.25401   |
| KIF11     | 6.23405   | 6.36389   | 5.7472   | 6.03964    | 6.02552   | 6.19527   |
| KIF13A    | 5.43756   | 5.52087   | 4.80089  | 5.42353    | 6.31925   | 6.64144   |
| KIF13B    | 4.26828   | 4.2402    | 3.67463  | 3.852      | 4.60937   | 4.21325   |
| KIF14     | 6.33105   | 6.46787   | 5.68066  | 5.98689    | 5.72339   | 5.83535   |
| KIF15     | 5.24598   | 5.32587   | 4.77576  | 4.97796    | 4.46767   | 4.74963   |
| KIF16B    | 4.84393   | 4.89029   | 3.93801  | 4.11758    | 2.94517   | 2.98329   |
| KIF18A    | 4.58342   | 4.67797   | 4.69452  | 5.145      | 4.65029   | 5.33219   |
| KIF18B    | 4.86746   | 4.76778   | 4.46931  | 4.59421    | 4.55581   | 3.99026   |
| KIF1B     | 6.00373   | 5.94944   | 6.36239  | 6.38949    | 6.90465   | 6.43091   |
| KIF1BP    | 4.04743   | 3.9976    | 3.64937  | 4.00361    | 4.17019   | 4.32395   |
| KIF1C     | 5.47832   | 5.28912   | 5.71921  | 5.901      | 6.62043   | 6.1644    |
| KIF20A    | 6.23403   | 6.28197   | 5.89162  | 6.43275    | 5.88877   | 5.88526   |
| KIF20B    | 6.10564   | 6.1816    | 5.81751  | 6.17337    | 5.93421   | 6.32327   |
| KIF21A    | 5.10342   | 4.98939   | 4.70977  | 4.60541    | 4.42516   | 4.15747   |
| KIF21B    | -1.65424  | -1.65505  | 2.42752  | 2.61228    | -5.65305  | -5.69922  |
| KIF22     | 5.38035   | 5.42851   | 5.01156  | 5.25155    | 4.78956   | 4.85738   |
| KIF23     | 6.38666   | 6.33924   | 5.85394  | 6.1768     | 6.27961   | 6.14771   |
| KIF24     | 3.58204   | 3.69069   | 3.61108  | 3.80254    | 4.21014   | 3.81901   |
| KIF26B    | -0.272655 | -0.707737 | 2.19153  | 1.9191     | 3.01565   | 3.64423   |
| KIF27     | 1.89343   | 1.923     | 2.05281  | 2.33817    | 0.0396157 | 0.50283   |
| KIF2A     | 4.85598   | 4.85569   | 5.11681  | 5.39398    | 5.19845   | 5.55949   |
| KIF2C     | 5.74679   | 5.95215   | 5.76676  | 6.30974    | 5.65032   | 5.92849   |
| KIF3A     | 4.65019   | 4.58222   | 4.36144  | 4.32475    | 4.24957   | 3.6813    |
| KIF3B     | 6.24196   | 6.17309   | 6.12708  | 6.31585    | 6.71254   | 6.4018    |
| KIF3C     | 3.70179   | 3.77913   | 3.13841  | 3.21085    | 3.91428   | 3.55068   |
| KIF4A     | 5.32067   | 5.4406    | 5.1506   | 5.5061     | 5.77761   | 5.92256   |

|         |          |          |           |           |          |          |
|---------|----------|----------|-----------|-----------|----------|----------|
| KIF4B   | 2.36567  | 2.51196  | 2.12143   | 2.55834   | 2.76874  | 2.67331  |
| KIF5A   | 1.60016  | 2.00478  | 1.78229   | 2.50221   | 1.99076  | 1.90064  |
| KIF5B   | 7.37866  | 7.33267  | 6.70426   | 6.98672   | 7.6211   | 7.46633  |
| KIF5C   | 5.52549  | 6.00246  | 2.59785   | 3.63094   | 2.52706  | 3.47568  |
| KIF7    | 2.55773  | 2.23311  | 3.72557   | 3.95527   | 2.16798  | 1.64122  |
| KIF9    | 1.15677  | 1.12027  | 0.281265  | 0.676592  | 1.48651  | 2.33464  |
| KIFAP3  | 4.45887  | 4.43422  | 3.09494   | 3.28349   | 3.79706  | 4.30591  |
| KIFC1   | 4.97575  | 4.91584  | 4.52996   | 4.85329   | 4.87298  | 4.66     |
| KIFC2   | 2.40927  | 2.08694  | 3.12831   | 3.17111   | 2.66392  | 2.19342  |
| KIFC3   | 4.00362  | 3.88361  | 4.35467   | 4.88003   | 4.97811  | 5.07135  |
| KIN     | 2.7542   | 2.71707  | 2.44585   | 2.36692   | 2.84153  | 2.85554  |
| KIRREL  | 7.4628   | 7.2325   | 7.24439   | 7.34731   | 7.58538  | 7.40955  |
| KIRREL3 | 2.07243  | 2.53435  | -0.568612 | -0.226029 | 1.90957  | 2.69844  |
| KITLG   | 3.98567  | 4.36131  | 4.55033   | 4.07481   | 3.38272  | 4.23139  |
| KIZ     | 3.33984  | 3.39668  | 2.76485   | 2.97598   | 3.75013  | 3.92628  |
| KLB     | 1.03569  | 1.06077  | -0.69145  | -0.301307 | 1.26455  | 0.422664 |
| KLC1    | 6.22492  | 6.14081  | 5.31512   | 5.38493   | 6.09135  | 5.64878  |
| KLC2    | 3.55934  | 3.52958  | 3.0581    | 3.33565   | 3.37337  | 3.02364  |
| KLC4    | 2.46174  | 2.43012  | 2.40519   | 2.56483   | 2.99289  | 2.88929  |
| KLF10   | 3.97864  | 4.15002  | 4.88186   | 4.83808   | 4.24505  | 3.95327  |
| KLF11   | 3.79377  | 3.75389  | 1.7294    | 1.65939   | 2.22845  | 1.99375  |
| KLF12   | 3.92022  | 3.85569  | 3.7663    | 3.76308   | 4.40509  | 4.25329  |
| KLF13   | 2.91564  | 3.28031  | 4.74054   | 5.0994    | 3.69393  | 3.69203  |
| KLF16   | 1.63634  | 1.39518  | 1.0357    | 1.51326   | 2.38955  | 2.354    |
| KLF3    | 4.10744  | 3.83178  | 3.90362   | 3.75381   | 5.17453  | 4.61745  |
| KLF4    | 1.62738  | 0.996642 | 0.371169  | 0.773887  | -1.75295 | -1.31405 |
| KLF5    | 3.44685  | 3.64175  | 2.0786    | 2.52781   | 2.0332   | 1.40185  |
| KLF6    | 4.53156  | 4.4701   | 4.78296   | 5.15268   | 4.47541  | 4.24894  |
| KLF7    | 3.62171  | 3.90566  | 3.45129   | 3.71295   | 4.81439  | 4.4174   |
| KLF9    | 6.56799  | 6.0558   | 4.83049   | 4.84026   | 4.17258  | 3.581    |
| KLHDC10 | 5.41205  | 5.42893  | 5.08326   | 5.41423   | 5.46864  | 5.49968  |
| KLHDC2  | 3.84735  | 3.97577  | 2.87194   | 3.04753   | 3.7853   | 4.27951  |
| KLHDC3  | 5.06083  | 4.76657  | 4.4052    | 4.44767   | 6.24001  | 6.23467  |
| KLHDC4  | 3.89897  | 3.86021  | 3.52728   | 3.56005   | 3.58524  | 3.47568  |
| KLHDC8B | 2.42764  | 2.19538  | 2.46754   | 2.51324   | 1.78266  | 2.06149  |
| KLHL11  | 3.27103  | 3.4198   | 3.39579   | 3.65106   | 4.05393  | 4.10546  |
| KLHL12  | 4.61284  | 4.55067  | 4.07308   | 4.16263   | 4.25445  | 4.46537  |
| KLHL13  | 1.07353  | 1.10179  | -4.18092  | -6.09892  | 5.41693  | 5.37436  |
| KLHL15  | 2.84782  | 3.03101  | 3.27796   | 3.49851   | 3.26747  | 3.49786  |
| KLHL17  | 1.84784  | 1.53719  | 1.70525   | 1.91357   | 2.51712  | 2.09421  |
| KLHL18  | 4.39851  | 4.62115  | 3.40148   | 3.87399   | 4.53674  | 4.64186  |
| KLHL2   | 2.6208   | 2.994    | 2.73701   | 3.24389   | 3.52219  | 3.56441  |
| KLHL20  | 4.088    | 4.19714  | 3.56802   | 3.70014   | 4.07016  | 4.16057  |
| KLHL21  | 4.81365  | 4.76175  | 3.9393    | 4.14856   | 5.15826  | 4.67158  |
| KLHL22  | 3.39756  | 3.4826   | 3.60438   | 3.61806   | 2.14706  | 2.02123  |
| KLHL23  | 4.57934  | 4.84315  | 2.81392   | 2.63407   | 3.8767   | 3.81223  |
| KLHL24  | 4.22572  | 4.09558  | 4.30431   | 4.39698   | 5.17059  | 5.5263   |
| KLHL25  | 2.59095  | 2.52869  | 2.66198   | 2.74293   | 1.57334  | 0.922708 |
| KLHL26  | 0.693311 | 0.548466 | -1.53926  | -0.899117 | 1.01923  | 0.578775 |
| KLHL28  | 3.68041  | 3.72828  | 2.24695   | 2.18123   | 4.37841  | 4.00236  |
| KLHL29  | 3.67705  | 3.67927  | 1.68687   | 1.9191    | 1.7191   | 1.80902  |
| KLHL36  | 5.07446  | 4.93589  | 4.59043   | 4.57679   | 4.20309  | 3.73623  |

|           |           |            |           |           |             |            |
|-----------|-----------|------------|-----------|-----------|-------------|------------|
| KLHL4     | -6.68418  | -5.45651   | 1.26773   | 2.01532   | 1.38413     | 2.57407    |
| KLHL42    | 4.8901    | 5.11646    | 4.54948   | 4.75535   | 4.70601     | 4.94613    |
| KLHL5     | 4.68849   | 4.77741    | 4.93389   | 5.32219   | 5.40742     | 5.52997    |
| KLHL7     | 4.42373   | 4.50798    | 4.454     | 4.69287   | 4.09625     | 4.5257     |
| KLHL7-AS1 | 0.0289651 | 0.0918691  | 1.63029   | 1.65939   | -1.61549    | -1.61882   |
| KLHL8     | 3.79477   | 3.86245    | 3.31832   | 3.57066   | 3.58524     | 3.46571    |
| KLHL9     | 4.96002   | 5.02749    | 4.71507   | 4.95321   | 5.80983     | 6.23028    |
| KLRAP1    | 0.930336  | 0.444137   | 1.52387   | 1.59165   | 0.86332     | -0.0341544 |
| KMO       | -0.402845 | -0.137938  | 0.61421   | 0.93876   | -0.00296634 | 0.312433   |
| KMT2A     | 6.96103   | 6.88812    | 7.33979   | 7.29206   | 6.4559      | 6.14269    |
| KMT2B     | 3.47585   | 3.2219     | 4.21628   | 4.0127    | 3.67954     | 3.27913    |
| KMT2C     | 7.03112   | 6.90047    | 7.13693   | 6.89954   | 7.41805     | 6.94348    |
| KMT2D     | 5.76227   | 5.4504     | 5.77691   | 5.53114   | 5.13953     | 4.95615    |
| KMT2E     | 5.40618   | 5.35412    | 5.26272   | 5.22313   | 5.59457     | 5.46156    |
| KNOP1     | 5.21551   | 5.15427    | 4.4937    | 4.57839   | 4.9489      | 4.68556    |
| KNSTRN    | 5.5662    | 5.65837    | 4.27693   | 4.9163    | 4.80013     | 5.22401    |
| KNTC1     | 6.02434   | 6.03399    | 6.33411   | 6.4641    | 5.50772     | 5.49234    |
| KPNA1     | 5.09098   | 5.05696    | 5.21177   | 5.40839   | 5.45008     | 5.36634    |
| KPNA2     | 7.35664   | 7.27449    | 6.99067   | 7.43194   | 7.99241     | 8.00636    |
| KPNA3     | 5.03096   | 5.16968    | 5.0984    | 5.4596    | 5.30221     | 5.41481    |
| KPNA4     | 5.47374   | 5.37617    | 5.87428   | 6.16655   | 6.45021     | 6.30318    |
| KPNA5     | 2.61381   | 2.82488    | 2.37491   | 2.69854   | 3.65597     | 4.53168    |
| KPNA6     | 6.17465   | 6.75483    | 6.03443   | 6.89025   | 6.24477     | 6.9226     |
| KPNB1     | 8.70795   | 8.52284    | 7.71597   | 7.98389   | 8.55433     | 8.5702     |
| KPTN      | 1.2317    | 0.920926   | -0.183372 | -0.327299 | 1.06767     | 0.769095   |
| KRAS      | 5.0215    | 4.96737    | 4.7535    | 4.92896   | 4.56158     | 4.17738    |
| KRBA1     | 2.85743   | 2.74173    | 2.60439   | 2.57769   | 2.41117     | 2.0415     |
| KRBA2     | 1.19395   | 1.28127    | 2.26109   | 2.27523   | 2.47902     | 2.27508    |
| KRBOX4    | 1.70667   | 1.85427    | 3.59105   | 3.67858   | 2.94001     | 2.89843    |
| KRCC1     | 3.2287    | 3.30037    | 3.3768    | 3.58292   | 2.8554      | 3.51004    |
| KREMEN1   | 3.83132   | 3.52867    | 4.60356   | 4.69932   | 0.568596    | 0.0747657  |
| KRI1      | 4.14447   | 4.09667    | 3.12212   | 3.34667   | 4.22627     | 3.77904    |
| KRIT1     | 4.96996   | 4.86542    | 6.16629   | 6.13422   | 5.09426     | 4.72696    |
| KRR1      | 5.28422   | 5.26024    | 5.01794   | 5.16674   | 5.11422     | 5.52545    |
| KRT10     | 1.89714   | 1.88591    | 1.40148   | 1.8512    | 3.23299     | 3.39657    |
| KRT15     | -1.20691  | 0.265185   | -2.48229  | -0.751045 | 1.21626     | 3.19114    |
| KRT18     | 6.25064   | 6.54808    | 5.7897    | 6.20864   | 1.78625     | 2.23709    |
| KRT18P11  | 1.07572   | 1.66184    | 0.680972  | 1.26844   | -3.01585    | -5.53632   |
| KRT18P15  | 0.744299  | 0.675753   | 1.84772   | 1.5274    | 0.233459    | -0.500516  |
| KRT18P31  | 1.25538   | 1.12963    | 2.00137   | 1.55655   | 0.947083    | 0.463298   |
| KRT18P57  | 0.62293   | 0.491443   | 0.571444  | 0.317536  | -0.530833   | -1.53638   |
| KRT7      | 0.258193  | 0.533025   | -0.275275 | 0.637694  | -0.941116   | -0.103928  |
| KRT8      | 1.63354   | 1.8143     | 1.39394   | 1.15211   | -1.98063    | -1.34115   |
| KRT80     | 2.45068   | 2.93591    | 2.39769   | 3.76307   | 4.34039     | 4.8305     |
| KRT81     | -1.53421  | -2.03355   | 3.37115   | 4.70695   | 7.42605     | 8.52866    |
| KRT86     | -4.07937  | -3.56131   | 0.317455  | 0.691749  | 0.69215     | 1.87929    |
| KRT87P    | -6.68418  | -4.87366   | -4.94564  | -2.97969  | 0.894721    | 2.46933    |
| KRT8P12   | 0.939512  | 0.831845   | 1.34853   | 1.40736   | 0.824589    | 0.294982   |
| KRT8P3    | -0.471271 | 0.0375931  | 1.08829   | 1.1388    | -0.522462   | -1.39435   |
| KRT8P33   | 0.584857  | -0.0174317 | 0.466162  | 0.32277   | -0.00779861 | -1.12145   |
| KRT8P39   | 1.02208   | 0.938098   | 0.156448  | 0.020584  | -0.285108   | -1.31405   |
| KRTCAP2   | 4.52543   | 4.57332    | 3.98747   | 4.241     | 4.54792     | 4.74717    |



|               |          |           |          |            |            |           |
|---------------|----------|-----------|----------|------------|------------|-----------|
| KSR1          | 3.14588  | 3.37859   | 1.52837  | 1.63266    | 3.28223    | 2.91309   |
| KSR2          | 3.95911  | 3.54977 ? | ?        |            | -0.530833  | 0.0213376 |
| KTI12         | 2.44871  | 2.56045   | 2.21308  | 2.55984    | 2.82543    | 2.98173   |
| KTN1          | 7.98958  | 8.13289   | 7.54707  | 7.69762    | 8.47754    | 8.56413   |
| KTN1-AS1      | 0.878411 | 0.794611  | 1.04535  | 0.845438   | 0.568596   | 1.0747    |
| KXD1          | 4.17788  | 4.12159   | 4.0125   | 4.39074    | 5.20493    | 5.34531   |
| KYNU          | 5.70481  | 5.33845   | 5.46585  | 6.64828    | -2.95876   | -2.70579  |
| L1CAM         | 5.94622  | 5.95541   | 4.30109  | 5.01108    | -2.13612   | 0.151378  |
| L2HGDH        | 3.1824   | 3.07323   | 2.19581  | 2.10867    | 2.80291    | 2.8355    |
| L3HYPDH       | 3.21062  | 3.37564   | 2.93609  | 2.86155    | 3.43196    | 3.91767   |
| L3MBTL1       | 1.13383  | 1.20254   | 2.35177  | 2.20407    | 1.40582    | 0.97985   |
| L3MBTL2       | 4.06281  | 4.13457   | 4.30625  | 4.72276    | 4.25867    | 4.15496   |
| L3MBTL3       | 2.54106  | 2.59875   | 2.36874  | 2.63506    | 2.21819    | 2.4726    |
| LA16c-358B7.3 | 1.82335  | 1.66669   | 2.23205  | 2.20637    | 1.32949    | 0.720716  |
| LA16c-3G11.7  | 0.34975  | 0.12071   | 0.255755 | 1.04232    | 1.01212    | 1.4099    |
| LA16c-431H6.6 | 1.08699  | 1.06713   | 0.559854 | -0.0568123 | 0.0679003  | -0.547805 |
| LA16c-431H6.7 | 1.36705  | 1.3764    | 0.517004 | 0.383121   | 0.0812851  | -0.95156  |
| LA16c-60H5.7  | 1.8132   | 1.75161   | 1.60636  | 1.95164    | 2.45591    | 2.16543   |
| LACC1         | 2.50841  | 2.45401   | 2.27788  | 2.64883    | -0.0602604 | 0.406526  |
| LACE1         | 0.792847 | 1.06859   | 1.76487  | 1.98923    | 2.08454    | 2.34315   |
| LACTB         | 3.26959  | 3.44404   | 4.01737  | 4.48736    | 4.56369    | 4.75373   |
| LACTB2        | 1.36689  | 1.66935   | -3.37468 | -2.97055   | 1.79986    | 2.45603   |
| LAGE3         | 2.21682  | 2.31196   | 1.14745  | 1.23107    | 3.24357    | 4.03305   |
| LAMA2         | -1.94365 | -1.80443  | -1.53926 | -1.20162   | 3.27938    | 3.81046   |
| LAMA3         | -3.2383  | -3.87578  | 1.65571  | 1.90242    | 0.305574   | 0.100762  |
| LAMA4         | 8.19867  | 8.67074   | 6.18845  | 6.08137    | 5.73703    | 6.27403   |
| LAMA5         | 1.86601  | 1.40129   | 1.18136  | 1.0629     | 5.12207    | 5.28687   |
| LAMB1         | 8.80809  | 9.07487   | 9.21147  | 8.98382    | 7.30131    | 7.32763   |
| LAMB2         | 5.96313  | 5.62063   | 5.15017  | 5.32891    | 6.30058    | 5.66832   |
| LAMB3         | 2.26672  | 2.68182   | 4.44126  | 5.50957    | 3.31698    | 4.00925   |
| LAMC1         | 9.59586  | 9.41388   | 8.39347  | 8.73227    | 8.26988    | 8.21334   |
| LAMP1         | 5.40556  | 6.47276   | 5.4942   | 6.58779    | 5.12431    | 5.83535   |
| LAMP2         | 6.73421  | 6.85996   | 6.54376  | 7.16877    | 8.74241    | 8.77177   |
| LAMTOR1       | 4.85454  | 4.56642   | 4.10534  | 4.3048     | 4.59472    | 4.60843   |
| LAMTOR2       | 3.55121  | 3.61264   | 2.86905  | 3.19038    | 3.10622    | 3.60389   |
| LAMTOR3       | 3.53932  | 3.68308   | 3.05965  | 3.57066    | 4.08704    | 4.79809   |
| LAMTOR4       | 4.14028  | 4.16902   | 3.74379  | 4.16093    | 4.31298    | 5.24716   |
| LAMTOR5       | 3.98478  | 4.1296    | 3.74826  | 4.17826    | 4.38818    | 4.93623   |
| LAMTOR5-AS1   | 2.9168   | 2.96903   | 2.68135  | 2.35337    | 2.25552    | 1.82366   |
| LANCL1        | 5.03306  | 5.27354   | 6.05875  | 6.30484    | 5.47924    | 5.74911   |
| LANCL2        | 3.49936  | 3.43349   | 2.67757  | 2.87702    | 3.65143    | 3.99892   |
| LANCL3        | 0.399051 | 0.868134  | -4.18092 | -6.09892   | 1.20392    | 1.77713   |
| LAP3          | 4.18105  | 4.32045   | 4.54018  | 5.17337    | 5.51921    | 5.61717   |
| LAPTM4A       | 5.50824  | 5.27017   | 5.59619  | 5.86271    | 5.74748    | 6.15514   |
| LAPTM4B       | 7.0926   | 7.11501   | 5.78945  | 5.66508    | 6.47548    | 6.53196   |
| LAPTM5        | -2.52833 | -3.00228  | 5.93961  | 6.3271     | -0.987612  | -1.61882  |
| LARGE         | 4.12747  | 4.41803   | 2.15635  | 1.92688    | -1.80184   | -2.38405  |
| LARP1         | 6.70578  | 6.79629   | 7.58537  | 7.85704    | 7.43252    | 7.0471    |
| LARP1B        | 3.81558  | 3.94009   | 3.06191  | 3.4534     | 3.60395    | 3.57405   |
| LARP4         | 6.64987  | 6.70029   | 6.08653  | 6.40219    | 6.14504    | 6.04519   |
| LARP4B        | 5.43952  | 5.39864   | 4.74794  | 4.82633    | 5.52267    | 5.21586   |
| LARP4P        | 1.50673  | 1.58941   | 0.609112 | 0.820306   | 0.870061   | 0.383132  |

|           |           |          |           |           |            |          |
|-----------|-----------|----------|-----------|-----------|------------|----------|
| LARP6     | 3.19261   | 3.21625  | 3.42187   | 4.24199   | 4.40037    | 4.90061  |
| LARP7     | 4.16051   | 4.10195  | 3.74269   | 3.8855    | 4.23073    | 4.73441  |
| LARS      | 7.4072    | 7.43657  | 6.32944   | 6.69045   | 7.2434     | 7.43889  |
| LARS2     | 5.00352   | 5.08067  | 4.18716   | 4.47988   | 4.72178    | 4.77003  |
| LAS1L     | 4.46265   | 4.46938  | 4.86971   | 5.11213   | 5.1828     | 5.00753  |
| LASP1     | 5.39432   | 5.37479  | 6.21035   | 6.85279   | 6.0563     | 6.3523   |
| LAT2      | 0.345419  | 0.456112 | -0.300715 | 0.139221  | -0.0308197 | -0.38461 |
| LATS1     | 4.75619   | 4.75868  | 4.54758   | 4.57669   | 5.44224    | 5.16896  |
| LATS2     | 3.67378   | 3.66514  | 3.62543   | 3.83515   | 3.6251     | 3.21513  |
| LAYN      | -5.69162  | -5.45651 | 3.57136   | 4.14621   | 6.29907    | 6.80971  |
| LBH       | 2.0921    | 2.1482   | -1.229    | -1.58485  | -4.33548   | -3.12051 |
| LBHD1     | 2.46685   | 2.70226  | 1.98072   | 2.3063    | 1.57615    | 1.17593  |
| LBR       | 6.4001    | 6.65071  | 6.42729   | 6.8145    | 6.08496    | 6.20165  |
| LCA5      | 2.59326   | 2.71708  | 2.07859   | 2.20407   | 3.38135    | 4.05815  |
| LCAT      | 0.989372  | 0.693614 | 1.51822   | 1.43042   | 1.16187    | 0.3684   |
| LCLAT1    | 5.41303   | 5.38067  | 4.34394   | 4.33308   | 5.06419    | 4.95772  |
| LCMT1     | 2.55596   | 2.51445  | 2.50299   | 3.15327   | 2.66388    | 3.01439  |
| LCMT1-AS2 | 1.70609   | 2.02099  | 2.64938   | 2.52781   | 1.48948    | 0.736302 |
| LCMT2     | 3.63184   | 3.62063  | 2.64304   | 3.1603    | 3.13248    | 3.42257  |
| LCN2      | 5.74954   | 6.4244   | -3.59683  | -3.78492  | -6.64581   | -5.69922 |
| LCOR      | 4.56007   | 4.67158  | 4.64699   | 4.84464   | 5.13856    | 5.1782   |
| LCORL     | 4.50087   | 4.48196  | 4.32853   | 4.33474   | 4.84343    | 4.86186  |
| LCP1      | 0.312247  | 2.01696  | -3.18222  | -1.15432  | -0.136602  | 0.50283  |
| LCTL      | 1.82812   | 1.68092  | -0.3852   | -0.174346 | 3.31199    | 3.5482   |
| LDAH      | 4.155     | 4.05481  | 3.63025   | 3.67744   | 4.0642     | 4.3087   |
| LDB1      | 3.73973   | 3.57744  | 4.61495   | 4.67252   | 4.97952    | 4.66833  |
| LDB2      | -0.144345 | 0.20969  | 3.44746   | 3.32051 ? |            | -5.69922 |
| LDHA      | 8.79795   | 8.88337  | 9.1006    | 9.42938   | 3.49357    | 3.84492  |
| LDHAP2    | 1.62619   | 1.49578  | 1.98751   | 2.28802   | 0.232071   | 0.229785 |
| LDHAP3    | 0.140792  | 0.364079 | 0.842858  | 1.40813   | -4.44942   | -4.06289 |
| LDHAP4    | 4.48065   | 4.67163  | 5.95315   | 6.19537   | -0.162623  | 0.42562  |
| LDHAP5    | 1.71865   | 1.64662  | 2.23792   | 2.50709   | -4.07293   | -3.70484 |
| LDHAP7    | 2.31884   | 2.73276  | 3.35338   | 3.54364   | -2.69678   | -2.8355  |
| LDHB      | 8.42579   | 8.31844  | 7.62078   | 8.03524   | 7.9161     | 8.58726  |
| LDHBP2    | 3.80296   | 3.80297  | 3.09067   | 3.54432   | 3.31769    | 3.52229  |
| LDLR      | 6.97267   | 6.90399  | 6.22054   | 6.59333   | 6.65515    | 6.55212  |
| LDLRAD3   | 4.60641   | 4.61063  | 2.03082   | 2.39898   | 4.02618    | 4.08281  |
| LDLRAD4   | -1.61119  | -2.46206 | 1.92897   | 1.13916   | 3.57323    | 2.87407  |
| LDLRAP1   | 2.63855   | 2.9529   | 2.72338   | 3.26621   | 3.08116    | 3.18203  |
| LDOC1     | -1.20691  | -1.87737 | 1.82213   | 1.7367    | 3.98805    | 3.85362  |
| LDOC1L    | 5.14405   | 5.23281  | 4.13275   | 4.58465   | 4.56368    | 4.49663  |
| LEAP2     | 1.83233   | 1.61934  | 2.48892   | 2.02562   | 1.60651    | 0.752791 |
| LEF1      | 4.79695   | 4.61324  | 4.03102   | 3.61695   | 2.2215     | 2.36488  |
| LEMD2     | 4.37972   | 4.33886  | 4.86836   | 5.11215   | 4.81186    | 4.61633  |
| LEMD3     | 4.96091   | 4.93482  | 3.99514   | 3.9826    | 4.39429    | 4.28905  |
| LENG1     | 0.998578  | 0.81295  | 0.94152   | 1.11479   | 1.28962    | 1.63917  |
| LENG8     | 4.49292   | 4.28085  | 5.54355   | 5.49218   | 4.97621    | 4.31212  |
| LEO1      | 4.52067   | 4.55816  | 3.93412   | 4.19153   | 4.64462    | 4.48557  |
| LEPR      | 1.68866   | 1.98628  | 2.36167   | 2.50089   | 3.72564    | 4.72278  |
| LEPROT    | 5.29071   | 5.13587  | 5.47622   | 5.78725   | 5.22766    | 5.72527  |
| LEPROTL1  | 4.12091   | 4.54559  | 4.00639   | 4.76076   | 4.35236    | 5.03709  |
| LETM1     | 5.40746   | 5.37242  | 4.67596   | 4.97597   | 6.02945    | 5.74036  |

|           |           |           |            |              |            |            |
|-----------|-----------|-----------|------------|--------------|------------|------------|
| LETM2     | 1.11013   | 1.25593   | 0.913715   | 1.31855      | -0.987612  | -0.433764  |
| LETMD1    | 4.35958   | 4.25568   | 4.52642    | 4.6097       | 3.78159    | 3.59934    |
| LFNG      | -0.768111 | -0.847889 | 1.20884    | 1.78602      | 0.954457   | 1.97981    |
| LGALS1    | 7.88754   | 7.76869   | 7.16567    | 7.82774      | 7.13126    | 7.66204    |
| LGALS3    | 3.21382   | 3.3429    | 3.81788    | 4.5169       | 2.86912    | 3.79114    |
| LGALS3BP  | 7.37718   | 7.26038   | 7.88814    | 8.00777      | 8.3849     | 8.33491    |
| LGALS8    | 4.83236   | 4.8856    | 4.99586    | 5.36685      | 5.3362     | 5.41856    |
| LGALSL    | 3.18966   | 3.3103    | 1.65571    | 1.92462      | 0.855456   | 0.951558   |
| LGMN      | 4.21573   | 4.05434   | 2.79263    | 3.20632      | 3.29764    | 3.36206    |
| LGMNP1    | 1.05213   | 0.933754  | -0.15225   | -0.275776    | 0.493709   | -0.497071  |
| LGR4      | 4.33916   | 4.14725   | 4.80586    | 4.56271      | 5.43447    | 5.81735    |
| LHFP      | 4.1782    | 4.30119   | 1.93025    | 2.27921      | 4.6158     | 4.1805     |
| LHFPL2    | 5.90574   | 5.69926   | 5.10358    | 5.46619      | 6.34572    | 6.19568    |
| LHX4      | 3.18055   | 3.07478   | 2.68201    | 2.66172      | 1.89131    | 1.22788    |
| LHX8      | -2.43244  | -1.87737  | 1.12941    | 0.957328 ?   | ?          |            |
| LIAS      | 1.27825   | 1.40756   | 1.33222    | 1.69856      | 2.44036    | 2.41742    |
| LIF       | 8.80317   | 9.01847   | 3.45375    | 4.09304      | 4.06831    | 3.97431    |
| LIFR      | 4.60886   | 4.62993   | 8.0625     | 7.64038      | 5.30291    | 5.36428    |
| LIFR-AS1  | -0.925423 | -1.03746  | 1.86471    | 1.19182      | -1.53062   | -1.26753   |
| LIG1      | 4.31633   | 4.2253    | 4.30673    | 4.29507      | 4.3111     | 4.27484    |
| LIG3      | 5.55313   | 5.53747   | 4.77549    | 4.83392      | 5.02778    | 4.77785    |
| LIG4      | 3.74904   | 3.6907    | 3.75458    | 3.85408      | 4.73576    | 4.74862    |
| LIMA1     | 6.68787   | 6.66223   | 6.4736     | 6.88888      | 6.00904    | 6.16286    |
| LIMCH1    | 5.48641   | 5.75479   | 7.0055     | 6.45627      | 8.37542    | 7.98011    |
| LIMD1     | 4.57521   | 4.45358   | 4.49757    | 4.68169      | 5.24498    | 4.99696    |
| LIMD1-AS1 | 0.736925  | 0.998802  | 0.342714   | 1.06904      | 1.45959    | 1.7384     |
| LIMD2     | 3.50298   | 2.78892   | 3.39834    | 3.21513      | 0.83825    | 0.453607   |
| LIME1     | 1.38363   | 1.23533   | 1.04705    | 1.06003      | 1.18666    | 0.869232   |
| LIMK1     | 3.23018   | 3.03502   | 5.05667    | 5.41815      | 5.23678    | 5.4161     |
| LIMK2     | 3.43292   | 3.35896   | 3.16303    | 3.0933       | 2.13097    | 2.11361    |
| LIMS1     | 4.89171   | 5.43043   | 4.72741    | 5.32424      | 5.59971    | 5.6758     |
| LIMS3     | -0.307737 | 0.415001  | -0.821327  | -0.0448256   | 0.196985   | 0.295323   |
| LIN28B    | 2.17746   | 2.49717   | -2.48229   | -4.52056     | -5.65305 ? |            |
| LIN37     | 1.38903   | 0.865167  | 1.99445    | 2.26685      | 2.1785     | 1.9963     |
| LIN52     | 2.90825   | 2.82256   | 1.78229    | 2.37096      | 2.75121    | 3.11984    |
| LIN54     | 4.20027   | 4.29037   | 4.21949    | 4.57153      | 4.22538    | 4.0212     |
| LIN7C     | 5.16428   | 5.55635   | 4.76188    | 5.39549      | 5.97896    | 6.231      |
| LIN9      | 3.23903   | 3.37004   | 3.15855    | 3.4342       | 3.10953    | 3.98503    |
| LINC-PINT | 4.46268   | 4.23932   | 4.97697    | 5.1938       | 4.03056    | 3.93714    |
| LINC00052 | -2.69815  | -2.87684  | -3.18222 ? |              | 2.45605    | 2.78915    |
| LINC00094 | 2.93756   | 2.84363   | 3.0966     | 3.30928      | 3.40758    | 3.29794    |
| LINC00116 | 1.11475   | 0.666511  | 0.623914   | 1.48367      | 1.71041    | 3.30731    |
| LINC00152 | 4.28106   | 4.0501    | 4.12631    | 4.35325      | 4.53562    | 4.28291    |
| LINC00174 | 0.840145  | 0.727049  | 1.95605    | 1.82784      | 0.670686   | -0.536593  |
| LINC00176 | 0.409538  | 0.491443  | 0.431281   | -0.000171691 | -0.338214  | -0.280287  |
| LINC00205 | 0.345419  | 0.525929  | 2.00137    | 2.10065      | 0.901996   | 0.33778    |
| LINC00216 | 1.04203   | 0.954591  | 0.460428   | 0.300663     | 0.458718   | -0.0918635 |
| LINC00235 | 1.68033   | 1.76119   | 1.09265    | 1.48367      | 0.305574   | 0.422664   |
| LINC00265 | 0.395392  | 0.578948  | 0.639788   | 0.336478     | -0.160869  | 0.0229714  |
| LINC00294 | 3.20868   | 3.44761   | 1.56295    | 2.23367      | 2.70669    | 3.01039    |
| LINC00310 | 2.06249   | 1.77559   | 3.08794    | 2.64941      | 0.625168   | -0.421131  |
| LINC00324 | 0.460879  | 0.432061  | 0.0260635  | 0.476226     | 0.0263185  | 0.97985    |

|           |           |           |            |            |            |            |
|-----------|-----------|-----------|------------|------------|------------|------------|
| LINC00326 | 1.85937   | 1.17383   | -2.72315   | -0.938639  | -2.41163   | -2.70579   |
| LINC00327 | 1.61384   | 1.39518   | -2.72315   | -2.64851   | -1.70566   | -1.18284   |
| LINC00339 | 2.57705   | 2.32507   | 2.62706    | 2.70817    | 1.86719    | 2.10066    |
| LINC00342 | 0.753664  | 0.968238  | 1.508      | 1.42215    | 1.77069    | 0.852039   |
| LINC00346 | 3.46959   | 3.19      | 2.23435    | 2.38704    | 3.70492    | 3.23287    |
| LINC00355 | 1.00834   | 1.06859   | -0.117291  | 0.020584 ? | ?          |            |
| LINC00460 | 1.82451   | 2.10703   | -5.1783    | -6.09892   | 2.2008     | 2.75273    |
| LINC00461 | 2.12112   | 2.29873   | 2.8193     | 3.07853    | 7.36643    | 7.40986    |
| LINC00467 | 1.05586   | 0.97184   | 2.17844    | 2.47615    | 1.64806    | 2.16982    |
| LINC00470 | 2.60471   | 2.48554   | -3.37468   | -3.78492 ? | ?          |            |
| LINC00472 | 3.97467   | 3.464     | 2.88257    | 3.05755    | 3.5537     | 3.31367    |
| LINC00473 | 4.53358   | 4.37452   | -5.1783    | -6.09892   | -0.466855  | -0.0133459 |
| LINC00476 | 1.90527   | 1.72789   | 1.34056    | 1.19681    | 1.27304    | 1.60882    |
| LINC00493 | 4.07546   | 4.1316    | 3.23955    | 3.72072    | 4.06398    | 5.0543     |
| LINC00511 | 5.04869   | 5.17739   | 2.9066     | 3.25312    | 5.26226    | 5.12141    |
| LINC00536 | -4.11163  | -3.46127  | 1.81651    | 2.37903    | -0.470299  | -0.38461   |
| LINC00601 | -0.191134 | -0.681268 | 1.13846    | 1.82784    | 1.45867    | 1.97279    |
| LINC00622 | 2.88213   | 2.9529    | -1.65952   | -0.786664  | -0.878698  | -0.577229  |
| LINC00623 | 1.47181   | 1.13697   | 0.271115   | 0.573045   | 0.248134   | 0.409527   |
| LINC00624 | 2.26606   | 2.33463   | 1.56118    | 1.31141    | 1.12369    | 0.377146   |
| LINC00630 | 1.71458   | 1.64021   | 2.37108    | 2.3602     | 2.05932    | 1.56011    |
| LINC00639 | -3.8896   | -4.45968  | -6.17309 ? |            | 3.18269    | 2.97858    |
| LINC00641 | 3.79777   | 3.71082   | 3.39955    | 3.24653    | 3.81339    | 3.11027    |
| LINC00657 | 8.14149   | 8.08933   | 7.65094    | 7.91006    | 7.72       | 7.42449    |
| LINC00662 | 2.13164   | 2.34051   | 3.4081     | 3.5252     | 3.52677    | 3.66146    |
| LINC00665 | 3.28361   | 3.19238   | 1.72026    | 1.67807    | 0.0116674  | -0.4586    |
| LINC00667 | -6.68418  | -6.45019  | 4.20105    | 4.30802    | 4.91762    | 4.71235    |
| LINC00680 | 2.26897   | 2.27013   | 2.22306    | 2.53112    | 2.53319    | 2.34839    |
| LINC00704 | 0.880497  | 0.988427  | -2.18288   | -0.716284  | 0.799187   | 1.03481    |
| LINC00707 | 2.06581   | 2.87032   | -3.01245   | -1.78641   | 1.31701    | 2.00067    |
| LINC00839 | 1.85553   | 1.5651    | 1.55798    | 1.93559    | 0.270529   | 0.0483059  |
| LINC00847 | 0.463403  | 0.522337  | 0.81646    | 0.939655   | 1.84875    | 2.26364    |
| LINC00852 | 0.195852  | 0.491443  | 0.474784   | 0.176693   | -0.470299  | -1.4584    |
| LINC00857 | 1.17133   | 1.01295   | -0.825729  | 0.0410467  | -0.0454657 | 0.463298   |
| LINC00863 | 0.966128  | 0.936493  | 1.57227    | 1.42996    | 1.29497    | 1.04558    |
| LINC00869 | 2.80447   | 2.73749   | 1.89024    | 1.92969    | 2.46648    | 1.92431    |
| LINC00882 | -2.17488  | -3.87578  | -0.790968  | -0.979274  | 2.35651    | 2.677      |
| LINC00883 | 2.38042   | 2.39204   | 2.85814    | 3.38703    | 2.50712    | 2.78114    |
| LINC00886 | 2.02204   | 1.84096   | 0.860939   | 1.07114    | -5.07051   | -5.69922   |
| LINC00888 | 1.30659   | 1.47941   | 1.75314    | 2.24434    | 1.66165    | 2.32672    |
| LINC00893 | -0.318925 | -0.715273 | 0.680909   | 0.710781   | 0.522257   | 0.295147   |
| LINC00894 | 0.217268  | -0.030547 | 0.984903   | 0.765212   | 1.13756    | 0.318369   |
| LINC00899 | -0.611411 | -0.847889 | 1.14744    | 1.1104     | 0.246688   | 0.247587   |
| LINC00909 | 2.59095   | 2.36372   | 1.99143    | 2.26623    | 1.18523    | 1.33772    |
| LINC00920 | 0.930336  | 1.07637   | 0.308431   | 0.367002   | 1.02625    | 1.86317    |
| LINC00941 | 0.243547  | 0.766044  | -0.325375  | 0.020584   | -0.802092  | -0.31423   |
| LINC00942 | -2.37642  | -2.6546   | 4.4005     | 4.71851    | -1.65987   | -2.38405   |
| LINC00960 | 0.987481  | 0.938098  | -1.93506   | -2.30078 ? | ?          |            |
| LINC00961 | -1.94365  | -3.46127  | -0.723865  | -1.02108   | 3.23602    | 3.29891    |
| LINC00963 | 3.83303   | 3.49346   | 3.25527    | 3.47989    | 5.23126    | 4.39525    |
| LINC00969 | 3.5527    | 3.45302   | 5.39308    | 5.40522    | 5.46767    | 5.02471    |
| LINC00973 | -0.721575 | -1.55554  | -0.723865  | -0.0426024 | 2.64804    | 3.2358     |

|                  |           |             |            |           |            |            |
|------------------|-----------|-------------|------------|-----------|------------|------------|
| LINC00998        | 4.22426   | 4.11741     | 2.96114    | 3.2131    | 3.37311    | 4.23286    |
| LINC01001        | 1.67629   | 1.37807     | 0.543417   | 0.397912  | -0.0756051 | -0.653051  |
| LINC01002        | 1.72579   | 1.70632     | 1.39116    | 1.38776   | 0.27664    | -0.618965  |
| LINC01004        | 0.108397  | 0.382745    | 0.488988   | 0.231137  | -0.932127  | -0.706491  |
| LINC01089        | 2.01522   | 1.88696     | 2.10326    | 2.11716   | 1.31367    | 1.37306    |
| LINC01116        | 2.28667   | 2.63732     | 2.04493    | 2.47223   | 2.79697    | 3.65726    |
| LINC01119        | 0.255223  | 0.727058    | 0.208904   | 0.176693  | 0.499649   | 0.615294   |
| LINC01128        | 2.26773   | 2.14974     | 1.72016    | 2.11431   | 3.04446    | 2.6853     |
| LINC01137        | 0.0824028 | 0.603321    | 0.793829   | 1.4458    | -0.490197  | -0.0918635 |
| LINC01138        | 2.36947   | 2.20897     | 2.07423    | 2.19205   | 1.75155    | 0.994587   |
| LINC01184        | 3.16201   | 3.31851     | 3.39579    | 3.50956   | 3.54304    | 3.84979    |
| LINC01224        | -1.7917   | -1.81849    | 1.95605    | 2.40294   | -0.393347  | -0.799586  |
| LINC01232        | 0.999011  | 0.871449    | 2.65782    | 2.50589   | -0.173838  | -0.577229  |
| LINC01268        | -1.8406   | -2.1403     | -1.93506   | -1.40802  | 3.66048    | 3.34857    |
| LINC01278        | 1.21386   | 0.859151    | 1.76487    | 1.43037   | 1.56854    | 1.17598    |
| LINC01291        | 1.8934    | 1.87257     | 0.584741   | 1.02051   | 1.60651    | 1.50278    |
| LINC01296        | 3.74485   | 3.78221     | 2.19339    | 1.64607   | 3.79895    | 4.06202    |
| LINC01311        | 1.09539   | 0.90354     | -0.206089  | -0.108685 | -0.682812  | -0.706491  |
| LINC01347        | 0.256141  | -0.257609   | 0.481526   | 0.280196  | 0.311898   | -0.843966  |
| LINC01355        | 4.3824    | 4.51443     | 3.24274    | 3.30269   | 3.97993    | 3.73207    |
| LINC01410        | 1.53341   | 1.58221     | 0.499149   | 0.486272  | 1.34621    | 1.14509    |
| LINC01419        | 2.56924   | 2.96076     | -6.17309   | -3.10759  | -3.85089   | -4.70296   |
| LINC01420        | 1.867     | 1.9295      | 1.92503    | 2.42646   | 2.88273    | 3.46322    |
| LINC01426        | 2.0921    | 2.27188     | -0.897866  | -0.786664 | -3.33694   | -2.8983    |
| LINC01444        | ?         | ?           | 0.558032   | 1.64609   | -0.959604  | 1.00759    |
| LINC01447        | 2.32607   | 2.64803     | -1.42826   | -1.78641  | -5.65305   | -3.70484   |
| LINC01465        | 1.72721   | 1.64571     | 0.759062   | 1.01017   | -0.470299  | 0.151378   |
| LINC01468        | -2.52833  | -3.65369 ?  | ?          |           | 1.67957    | 1.9868     |
| LINC01481        | 1.06521   | 0.633087    | -0.0126762 | -0.177162 | -0.186485  | -0.63717   |
| LINC01515        | 2.44048   | 2.35735     | -6.17309 ? |           | 1.99076    | 1.47324    |
| LINC01521        | 1.27825   | 0.996649    | 0.996447   | 0.414828  | -0.23389   | -0.848487  |
| LINC01551        | -2.52833  | -3.65369    | 1.25947    | 1.78602   | 3.0625     | 3.25039    |
| LINC01572        | 0.317431  | 0.0273664   | 0.993312   | 0.901417  | 0.615934   | -0.0428625 |
| LINC01578        | 4.6648    | 4.67065     | 5.05145    | 4.83703   | 5.3221     | 5.18249    |
| LINC01579        | 0.727258  | 0.938098 ?  |            | -6.09892  | 2.93775    | 2.98329    |
| LINC01604        | 0.752201  | 0.278722    | 0.558032   | 0.605504  | 0.947083   | 0.633217   |
| LINGO2           | -0.359059 | -0.333394 ? | ?          |           | 1.78266    | 2.14505    |
| LINS             | 3.54066   | 3.45154     | 3.02837    | 3.31324   | 2.89266    | 3.0178     |
| LIPA             | 5.57531   | 5.476       | 5.54272    | 5.76574   | 5.82528    | 6.36642    |
| LIPG             | -1.56938  | -1.37502 ?  |            | -6.09892  | 1.40043    | 2.5925     |
| LIPH             | -2.37642  | -1.33321    | 0.120378   | 0.367002  | 1.98357    | 1.92993    |
| LIPT1            | 0.906567  | 0.939603    | 0.842963   | 0.869808  | 0.815789   | 1.29519    |
| LITAF            | 5.19459   | 4.77077     | 5.00506    | 5.09145   | 4.52457    | 4.01609    |
| LIX1L            | 4.42317   | 4.56636     | 4.16091    | 4.36609   | 4.71903    | 4.59038    |
| LL0XNC01-237H1.2 | 0.0692347 | 0.0299405   | 1.11115    | 1.12634   | 1.26713    | 0.878317   |
| LL0XNC01-7P3.1   | 1.30659   | 1.03706     | 1.48185    | 1.38307   | -0.136604  | -1.006     |
| LL22NC03-80A10.6 | 2.31467   | 2.17973     | 2.08193    | 2.31929   | 1.76576    | 1.64809    |
| LL22NC03-86G7.1  | 4.2398    | 4.19902     | 3.69901    | 3.82296   | 3.07615    | 2.58653    |
| LL22NC03-N14H11  | 1.80874   | 1.98426     | 0.871828   | 0.505972  | 1.02625    | 0.560157   |
| LL22NC03-N64E9.1 | 2.03794   | 2.34647     | 1.076      | 1.10816   | 1.21475    | 0.532407   |
| LLGL1            | 3.26526   | 3.09749     | 3.74277    | 3.99183   | 3.90098    | 4.11982    |
| LLNLR-222A1.1    | 2.33898   | 2.16368     | 2.357      | 2.28672   | 2.11858    | 1.92916    |

|           |            |           |            |           |            |          |
|-----------|------------|-----------|------------|-----------|------------|----------|
| LLPH      | 4.17926    | 4.27926   | 2.98018    | 3.50551   | 4.62632    | 4.7417   |
| LMAN1     | 7.33331    | 7.43261   | 7.17043    | 7.67638   | 5.65284    | 5.98197  |
| LMAN2     | 5.71321    | 5.53926   | 6.05368    | 6.38099   | 6.34337    | 6.52808  |
| LMAN2L    | 3.71771    | 3.66386   | 4.32327    | 4.68881   | 4.27116    | 4.45694  |
| LMBR1     | 5.73081    | 5.78426   | 5.90738    | 5.88918   | 4.84842    | 4.71799  |
| LMBR1L    | 3.38041    | 3.2376    | 3.65725    | 3.73038   | 2.78885    | 2.677    |
| LMBRD1    | 3.42763    | 3.55396   | 2.93022    | 3.28777   | 3.49071    | 4.25329  |
| LMBRD2    | 3.39499    | 3.53151   | 4.79446    | 4.89398   | 4.90097    | 4.88853  |
| LMCD1     | 4.74645    | 4.84092   | 1.66826    | 1.70499   | 4.77951    | 3.62421  |
| LMF1      | 0.9596     | 0.645757  | 0.796083   | -0.086319 | -2.01588   | -3.38329 |
| LMF2      | 4.24342    | 3.95817   | 5.13782    | 5.25692   | 1.69286    | 1.87827  |
| LMLN      | 1.7928     | 2.02502   | 3.43113    | 3.79651   | 3.46639    | 4.08605  |
| LMNA      | 7.59802    | 7.47259   | 6.78712    | 7.27609   | 6.65907    | 6.83342  |
| LMNB1     | 5.9551     | 6.06119   | 5.94897    | 6.13287   | 6.0068     | 6.05316  |
| LMNB2     | 6.20405    | 5.88973   | 5.65568    | 5.89327   | 6.55856    | 6.08118  |
| LMO3      | -0.840854  | -0.847889 | 2.09727    | 2.36286   | 5.11447    | 5.10626  |
| LMO4      | 4.58458    | 4.24537   | 4.15744    | 4.39499   | 4.39564    | 5.32326  |
| LMO7      | 6.03239    | 6.22796   | 4.8965     | 5.07634   | 5.05854    | 4.83697  |
| LMTK2     | 5.48888    | 5.28282   | 5.53329    | 5.3935    | 4.96036    | 4.44557  |
| LNP1      | 0.414449   | -0.113543 | 0.642443   | 0.595991  | 0.788126   | 0.85366  |
| LNPEP     | 5.96901    | 5.91      | 6.79211    | 6.85803   | 6.47711    | 6.46504  |
| LNX1      | 0.925331   | 0.984713  | 0.679433   | 0.997784  | 2.63422    | 2.92497  |
| LNX2      | 2.61608    | 2.53998   | 3.06915    | 3.36488   | 2.78264    | 2.71956  |
| LOH12CR1  | 2.92481    | 2.91002   | 2.29223    | 2.02048   | 2.16943    | 2.5925   |
| LONP1     | 5.13853    | 4.81385   | 4.63824    | 4.85984   | 5.60618    | 5.54417  |
| LONP2     | 5.7215     | 5.829     | 6.08493    | 6.39964   | 6.89129    | 6.99185  |
| LONRF1    | 2.00485    | 2.00478   | 2.68993    | 2.93284   | 1.83956    | 2.2002   |
| LONRF2    | 5.43211    | 6.10199   | 0.711372   | 1.32585   | 4.24432    | 3.85933  |
| LONRF3    | 0.195852   | -0.508457 | 0.914572   | 1.0511    | 1.32273    | 1.1637   |
| LOX       | 1.52511    | 1.58948   | 5.61261    | 6.16483   | 3.56318    | 2.06187  |
| LOXL1     | -5.69162   | -5.45651  | 4.24797    | 3.84246   | 1.99433    | 2.39465  |
| LOXL1-AS1 | -6.68418 ? |           | 2.26358    | 2.51324   | 1.14712    | 2.08361  |
| LOXL2     | 8.14027    | 7.91334   | 8.23795    | 8.16006   | 7.40975    | 7.04232  |
| LOXL3     | 7.20169    | 6.72898   | 2.49297    | 2.5031    | 3.23864    | 3.0604   |
| LOXL4     | -0.578973  | -1.105    | 1.00237    | 0.773887  | 2.09125    | 0.749826 |
| LPAR1     | -4.11163   | -4.13839  | 4.40801    | 4.97132   | -6.64581 ? |          |
| LPAR6     | 2.02204    | 2.02099   | 2.4052     | 2.32164   | 2.83155    | 3.01438  |
| LPCAT1    | 5.26634    | 5.08979   | 4.45851    | 4.84754   | 4.92604    | 4.89506  |
| LPCAT2    | -2.45038   | -1.93875  | 1.85174    | 2.96594   | 4.97618    | 5.3469   |
| LPCAT3    | 4.00972    | 3.75879   | 4.01369    | 4.14696   | 3.05684    | 2.99882  |
| LPCAT4    | 2.90641    | 2.99043   | 3.09493    | 3.20632   | 3.11448    | 2.63759  |
| LPGAT1    | 6.64346    | 6.53448   | 6.47859    | 6.61732   | 6.13328    | 5.86028  |
| LPIN1     | 5.2209     | 5.23715   | 5.23536    | 5.55206   | 6.03993    | 6.36306  |
| LPIN2     | 3.01663    | 3.00853   | 6.08054    | 6.20501   | 5.81056    | 5.42318  |
| LPL       | 2.57705    | 3.33158   | -3.18222   | -3.78492  | -4.65668   | -4.11926 |
| LPP       | 7.04287    | 6.92867   | 6.78674    | 6.78953   | 7.5204     | 7.31922  |
| LPP-AS2   | 2.19586    | 2.13906   | 1.93561    | 2.09183   | 1.42052    | 1.03898  |
| LPPR2     | 2.29245    | 1.94232   | 2.81649    | 2.93557   | 3.08788    | 3.27628  |
| LPXN      | 0.399051   | 0.6247    | 2.90394    | 3.94645   | 1.15352    | 1.92267  |
| LRAT      | 2.78071    | 2.90567   | -3.59683 ? |           | 0.427241   | 0.878317 |
| LRBA      | 6.05791    | 6.01446   | 6.09181    | 6.0754    | 6.04142    | 6.03207  |
| LRCH1     | 4.10019    | 4.18281   | 3.98263    | 4.03072   | 3.6274     | 3.49786  |

|            |           |           |          |          |          |             |
|------------|-----------|-----------|----------|----------|----------|-------------|
| LRCH2      | -0.272655 | -0.39658  | -6.17309 | -3.10759 | 3.39768  | 3.2358      |
| LRCH3      | 4.43593   | 4.37714   | 4.88113  | 4.8107   | 4.98292  | 4.77396     |
| LRCH4      | 2.32639   | 2.086     | 2.62028  | 2.61161  | 2.21257  | 2.17953     |
| LRFN3      | 1.25516   | 1.15925   | 1.05494  | 0.946521 | 0.362161 | 0.422664    |
| LRFN4      | 2.31173   | 1.99202   | 1.60838  | 2.04579  | 1.4128   | 1.86698     |
| LRIF1      | 4.01511   | 3.94603   | 3.57756  | 3.79495  | 3.10257  | 2.89324     |
| LRIG1      | 4.49554   | 4.68289   | 2.83556  | 2.80736  | 5.0785   | 4.56669     |
| LRIG2      | 4.71398   | 4.66549   | 4.66274  | 4.6552   | 4.83051  | 4.48547     |
| LRIG3      | 4.88351   | 4.98732   | 4.28203  | 4.30162  | 5.11281  | 5.10705     |
| LRP1       | 4.47832   | 4.25397   | 7.03862  | 6.66406  | 2.27634  | 2.37545     |
| LRP10      | 4.92251   | 4.81094   | 4.97318  | 5.12058  | 4.93167  | 5.07545     |
| LRP11      | 4.15771   | 4.19752   | 5.25619  | 5.5426   | 2.92229  | 2.9515      |
| LRP12      | 4.7256    | 4.90458   | 5.22212  | 5.39398  | 5.6745   | 5.74603     |
| LRP1B      | 3.65296   | 3.24452   | -1.34596 | -1.78641 | 5.76645  | 5.33288     |
| LRP2BP     | 2.18968   | 2.06856   | 2.01617  | 1.68562  | 1.99792  | 1.17598     |
| LRP4       | 3.66892   | 3.31985   | 3.93665  | 3.41446  | 3.82266  | 3.48571     |
| LRP5       | 4.21078   | 3.47379   | 4.32428  | 4.44191  | 3.05566  | 2.79314     |
| LRP5L      | 2.3724    | 2.19181   | 2.35177  | 2.375    | 1.53448  | 0.863209    |
| LRP6       | 7.11888   | 7.01989   | 6.27437  | 6.18525  | 6.25746  | 6.05607     |
| LRP8       | 6.45286   | 6.62409   | 6.30424  | 6.67073  | 6.22115  | 6.39516     |
| LRPAP1     | 5.89149   | 5.62062   | 5.15464  | 5.24651  | 5.78676  | 5.72006     |
| LRPPRC     | 7.09886   | 6.95011   | 6.37009  | 6.51801  | 6.69502  | 6.85957     |
| LRR1       | 3.63629   | 3.70875   | 2.61483  | 2.92118  | 3.06761  | 3.88689     |
| LRRC1      | 2.76605   | 2.98978   | 1.66449  | 1.83212  | 3.68222  | 3.79917     |
| LRRC14     | 3.60013   | 3.45303   | 3.85613  | 4.01858  | 3.87751  | 3.68889     |
| LRRC15     | 4.32746   | 4.51586   | -4.59508 | -4.52056 | -4.33548 | -5.69922    |
| LRRC16A    | 3.9618    | 3.96236   | 3.36723  | 3.55295  | 3.59708  | 3.83244     |
| LRRC17     | 2.52202   | 2.0802    | 4.64457  | 4.14789  | 2.08339  | 2.06809     |
| LRRC2      | -2.30606  | -2.6546   | -6.17309 | -5.10387 | 2.72772  | 3.29047     |
| LRRC20     | 2.26383   | 2.03702   | 2.52729  | 2.75846  | 1.94334  | 2.48805     |
| LRRC23     | 0.572114  | 0.151924  | 1.7024   | 1.70987  | 0.398263 | 0.127118    |
| LRRC27     | 0.768595  | 0.666511  | 1.7707   | 1.69856  | 1.60182  | 1.71117     |
| LRRC28     | 2.74801   | 2.81329   | 2.58354  | 2.95457  | 2.59944  | 3.19113     |
| LRRC37A    | 1.51168   | 1.51666   | 1.96663  | 1.94148  | 0.536073 | 0.297884    |
| LRRC37A16P | 0.0266726 | -0.202957 | 1.51514  | 1.62655  | 1.61197  | 1.567       |
| LRRC37A17P | 2.42249   | 2.42269   | 3.15617  | 3.16433  | 2.44403  | 2.4217      |
| LRRC37A2   | 4.58601   | 4.47094   | 4.53635  | 4.32154  | 3.2306   | 2.32814     |
| LRRC37A3   | 2.00988   | 2.11978   | 2.66136  | 2.25878  | 0.934705 | 0.514117    |
| LRRC37A4P  | 4.10842   | 3.95094   | 4.61925  | 4.53571  | 4.42981  | 3.85731     |
| LRRC37B    | 2.43035   | 2.2461    | 2.23165  | 2.23441  | 2.54392  | 1.98991     |
| LRRC37BP1  | 3.31272   | 3.17852   | 3.59069  | 3.57085  | 4.01994  | 3.6506      |
| LRRC4      | 1.60016   | 1.45605   | 1.51695  | 1.49854  | 0.625168 | -0.00614162 |
| LRRC40     | 4.03393   | 4.27355   | 4.15743  | 4.57065  | 3.75226  | 4.58445     |
| LRRC41     | 5.34715   | 5.39815   | 6.13747  | 6.44235  | 5.47732  | 5.4962      |
| LRRC42     | 3.73241   | 3.68689   | 3.95731  | 4.36892  | 3.44298  | 3.73623     |
| LRRC45     | 3.18509   | 2.66387   | 2.4422   | 2.49481  | 2.81543  | 2.5317      |
| LRRC47     | 4.28084   | 4.10052   | 3.75035  | 4.25529  | 5.15601  | 4.93112     |
| LRRC48     | 0.749277  | 0.788686  | 0.924594 | 1.15625  | 0.718956 | -0.176719   |
| LRRC49     | 2.43268   | 2.75887   | 2.17271  | 2.65653  | 1.85575  | 3.02567     |
| LRRC57     | 3.51613   | 3.8144    | 2.40141  | 3.11757  | 3.41543  | 3.79558     |
| LRRC58     | 6.00394   | 6.23736   | 5.65331  | 6.14559  | 6.27649  | 6.29855     |
| LRRC59     | 7.04964   | 7.07993   | 6.4582   | 7.06376  | 7.35904  | 7.27475     |

|             |           |           |           |           |            |           |
|-------------|-----------|-----------|-----------|-----------|------------|-----------|
| LRRC7       | -0.359059 | -0.604659 | 0.156448  | -0.275776 | 1.96907    | 0.937201  |
| LRRC70      | -0.254317 | 0.377213  | 0.978701  | 0.708929  | -0.859826  | -0.546745 |
| LRRC75A     | 3.05408   | 2.94966   | 2.46801   | 2.56615   | 3.53005    | 3.26634   |
| LRRC75A-AS1 | 6.81204   | 6.7698    | 6.6629    | 7.06206   | 7.66443    | 8.168     |
| LRRC8A      | 5.11027   | 5.00731   | 4.31732   | 4.51321   | 5.52119    | 5.70691   |
| LRRC8B      | 4.58997   | 4.72855   | 2.08796   | 2.04071   | 4.73474    | 4.86028   |
| LRRC8C      | 4.15967   | 3.7356    | 4.40143   | 4.17657   | 4.11283    | 3.54831   |
| LRRC8D      | 5.40318   | 5.43464   | 5.59      | 6.00918   | 6.31306    | 6.35392   |
| LRRC8E      | 2.25449   | 1.90056   | 2.09794   | 2.11936   | 2.01804    | 1.77292   |
| LRRCC1      | 3.21232   | 3.39203   | 2.20451   | 2.45343   | 3.89906    | 4.74449   |
| LRRFIP1     | 5.5383    | 5.75367   | 6.70802   | 6.9875    | 6.37738    | 5.97661   |
| LRRFIP1P1   | 0.763352  | 0.774292  | 1.6688    | 1.80903   | 2.42945    | 1.61684   |
| LRRFIP2     | 5.00611   | 5.14169   | 4.21628   | 4.61055   | 5.5049     | 5.89366   |
| LRRIQ3      | 1.20786   | 1.5651    | 0.636738  | 0.95732   | -0.959604  | 0.0747657 |
| LRRK1       | 0.938286  | 1.78454   | 4.44442   | 4.3115    | -0.597952  | -1.53638  |
| LRRK2       | 2.39897   | 2.58973   | -5.1783   | -5.10387  | -1.26766   | -0.497071 |
| LRRN2       | -4.69535  | -6.45019  | 2.23435   | 2.40294   | -3.33694   | -3.70484  |
| LRRN3       | 4.34259   | 4.08886   | -0.757028 | -1.15432  | -0.0308211 | -0.348991 |
| LRRTM2      | 3.48092   | 3.41901   | 3.23084   | 3.08507   | 2.36761    | 2.24673   |
| LRRTM4      | 2.26094   | 1.53154   | 0.649441  | -0.154483 | -6.64581 ? |           |
| LRSAM1      | 1.85937   | 1.83639   | 1.98141   | 2.13437   | 2.24359    | 1.9868    |
| LRTOMT      | 2.24812   | 2.30726   | 2.3173    | 2.26762   | 1.80094    | 1.70851   |
| LRWD1       | 3.64299   | 3.61531   | 2.54441   | 2.94917   | 3.34391    | 3.49296   |
| LSAMP       | 4.49011   | 4.65218   | 1.60441   | 1.61913   | 3.68951    | 4.09902   |
| LSG1        | 5.13854   | 5.25525   | 5.3648    | 5.73193   | 5.92086    | 6.03936   |
| LSM1        | 3.67971   | 3.69715   | 2.9627    | 3.35029   | 3.8843     | 4.57058   |
| LSM10       | 2.71244   | 2.6483    | 2.29628   | 2.7209    | 3.19612    | 3.44302   |
| LSM11       | 3.76852   | 3.69954   | 3.0501    | 2.98921   | 4.2578     | 3.90246   |
| LSM12       | 3.66898   | 3.44983   | 3.51576   | 3.86126   | 4.88706    | 4.9224    |
| LSM12P1     | 2.52351   | 2.51774   | 2.41517   | 2.71461   | 3.8011     | 3.90478   |
| LSM14A      | 5.47583   | 5.37032   | 5.3667    | 5.59413   | 6.13614    | 5.73983   |
| LSM14B      | 4.66395   | 4.38889   | 3.8839    | 3.81003   | 4.74002    | 4.17746   |
| LSM2        | 3.06248   | 3.1756    | 2.55703   | 2.95996   | 3.65868    | 4.31426   |
| LSM3        | 4.55195   | 4.5409    | 3.81534   | 4.242     | 4.61729    | 5.66164   |
| LSM4        | 4.71664   | 4.4986    | 4.30531   | 4.60284   | 5.77089    | 6.09616   |
| LSM5        | 4.94566   | 4.92086   | 4.38443   | 4.55561   | 4.95623    | 5.60899   |
| LSM6        | 2.8107    | 2.83866   | 2.06917   | 2.10065   | 2.3593     | 2.29893   |
| LSM7        | 2.98743   | 2.85457   | 2.02595   | 2.5169    | 3.39361    | 3.93353   |
| LSM8        | 4.36431   | 4.30119   | 4.48181   | 4.55561   | 4.3033     | 4.63979   |
| LSR         | 1.07576   | 1.05291   | -0.401986 | 0.0410467 | -0.551587  | 0.0213376 |
| LSS         | 4.50936   | 4.21104   | 5.59698   | 5.8793    | 5.60566    | 5.71869   |
| LTA4H       | 5.13234   | 5.00949   | 4.85145   | 5.02918   | 4.29865    | 4.60688   |
| LTB4R       | 1.37778   | 1.3251    | 1.61741   | 1.49854   | 0.469063   | -1.24695  |
| LTB4R2      | 1.53634   | 1.24253   | 0.555384  | 1.29588   | 0.864572   | -0.23555  |
| LTBP1       | 2.58402   | 2.41675   | 2.13843   | 2.85985   | 5.73525    | 5.94524   |
| LTBP2       | 2.96502   | 2.91767   | 0.816542  | 1.07114   | 2.14297    | 2.21217   |
| LTBP3       | 4.44994   | 4.33836   | 3.99129   | 3.92399   | 3.59721    | 3.34233   |
| LTBP4       | 2.13383   | 1.62465   | 2.44585   | 2.42257   | 1.83557    | 2.00755   |
| LTBR        | 5.21902   | 5.17678   | 5.68577   | 5.86009   | 4.3453     | 4.41485   |
| LTF         | -5.69162  | -5.45651  | -5.1783   | -4.10635  | 2.56129    | 3.26771   |
| LTN1        | 5.5435    | 5.69324   | 6.00442   | 6.29602   | 5.9272     | 6.59678   |
| LTV1        | 4.45763   | 4.37714   | 3.66197   | 4.0127    | 5.08283    | 5.27695   |



|          |          |            |           |           |           |           |
|----------|----------|------------|-----------|-----------|-----------|-----------|
| LUC7L    | 3.07736  | 3.03701    | 4.6454    | 4.52143   | 4.48689   | 4.19565   |
| LUC7L2   | 3.97378  | 3.55116    | 3.27083   | 3.62636   | 4.44324   | 4.63923   |
| LUC7L3   | 6.71043  | 6.65705    | 7.03275   | 6.9695    | 6.76895   | 6.1462    |
| LUCAT1   | 2.90597  | 2.72366    | 5.60513   | 5.724     | 1.43523   | 0.50283   |
| LUM      | 1.52013  | 1.54842    | -0.973801 | -0.716284 | -1.57243  | -0.38461  |
| LURAP1L  | 1.76855  | 1.37009    | 4.46663   | 4.54132   | 3.40981   | 3.67482   |
| LUZP1    | 6.08232  | 5.99261    | 5.95542   | 6.13627   | 5.95557   | 5.68962   |
| LY6E     | 4.85357  | 4.87866    | 5.60929   | 5.85117   | -1.65987  | -2.00571  |
| LY6G5B   | 2.07926  | 1.86618    | 2.30905   | 2.2328    | 2.12935   | 1.29783   |
| LY6K     | 4.7476   | 4.4339     | -0.161243 | 0.292252  | -0.675012 | -0.756414 |
| LY96     | ?        | -5.45651   | 1.24279   | 1.74295   | 2.14707   | 3.69629   |
| LYAR     | 4.0994   | 4.13891    | 2.47827   | 3.0586    | 4.70654   | 4.70373   |
| LYN      | ?        | -5.45651   | 3.7037    | 4.11396   | 3.09124   | 3.15438   |
| LYPD1    | 5.66406  | 5.51057    | 2.22118   | 2.67383   | 6.52095   | 6.90893   |
| LYPD6    | 2.92846  | 3.29538    | 2.40521   | 2.54224   | 1.44301   | 1.97981   |
| LYPD6B   | ?        | -6.45019   | 3.55963   | 3.90938 ? |           | -5.69922  |
| LYPLA1   | 5.29629  | 5.41643    | 4.98539   | 5.21255   | 5.19482   | 4.95538   |
| LYPLA1P3 | 2.26967  | 2.37592    | 1.61483   | 2.18556   | 2.03071   | 2.46135   |
| LYPLA2   | 4.01812  | 3.94942    | 3.00832   | 3.40419   | 4.77928   | 5.19125   |
| LYPLA2P1 | 2.18996  | 1.94998    | 1.02622   | 1.21881   | 2.76542   | 2.91359   |
| LYPLA2P2 | 0.328503 | 0.173537   | -0.623825 | -0.137643 | 0.988739  | 1.53458   |
| LYPLAL1  | 2.69325  | 2.59516    | 2.96877   | 3.23547   | 2.70602   | 3.2677    |
| LYRM1    | 2.33505  | 2.12765    | 2.48679   | 2.97599   | 2.22702   | 2.96956   |
| LYRM2    | 5.1863   | 5.16753    | 3.66403   | 4.06287   | 5.50635   | 5.97465   |
| LYRM4    | 3.18814  | 3.26677    | 2.4164    | 2.68885   | 3.78677   | 3.93353   |
| LYRM5    | 1.82125  | 1.82916    | 1.99375   | 2.29054   | 1.94883   | 2.57431   |
| LYRM7    | 3.80375  | 3.83865    | 4.26149   | 4.57065   | 5.01916   | 4.98589   |
| LYSMD1   | 2.80078  | 2.79926    | 2.18282   | 2.19497   | 2.62279   | 2.82857   |
| LYSMD2   | 1.82842  | 2.06856    | 1.25115   | 1.76772   | 1.43249   | 1.97981   |
| LYSMD3   | 3.81463  | 3.77316    | 4.25422   | 4.77306   | 5.1781    | 5.51786   |
| LYSMD4   | 2.64401  | 2.35995    | -1.54864  | -1.64961  | 1.67948   | 1.46623   |
| LYST     | 6.05911  | 5.62563    | 6.18037   | 6.28985   | 6.03827   | 6.27688   |
| LZIC     | 3.5429   | 3.53149    | 2.61415   | 2.84247   | 3.8544    | 4.17133   |
| LZTFL1   | 2.9627   | 2.61665    | 2.73832   | 2.67254   | 3.23754   | 3.36474   |
| LZTR1    | 4.71083  | 4.60189    | 4.1991    | 4.5278    | 3.98804   | 3.80306   |
| LZTS1    | 4.30374  | 4.29786    | 2.49948   | 2.65605   | 1.49454   | 1.70271   |
| LZTS2    | 4.48563  | 4.27583    | 4.1257    | 4.33788   | 4.19207   | 3.88195   |
| LZTS3    | 1.80478  | 2.32833    | 1.51695   | 2.33414   | 2.52458   | 3.03476   |
| M6PR     | 7.17893  | 7.17949    | 6.35657   | 6.68976   | 7.0065    | 7.42668   |
| MAB21L2  | 0.367103 | -0.0876659 | 0.401532  | 0.685662  | -0.121008 | -0.95156  |
| MACF1    | 8.86519  | 8.76081    | 8.78737   | 8.83069   | 10.0017   | 9.4865    |
| MACROD1  | 1.83622  | 1.67161    | 0.460428  | 0.248838  | 0.732078  | 1.06153   |
| MAD1L1   | 3.48455  | 3.3637     | 3.48536   | 3.81746   | 3.32553   | 3.22403   |
| MAD2L1   | 5.66346  | 5.8055     | 4.81028   | 5.20562   | 6.14042   | 6.76206   |
| MAD2L1BP | 3.36702  | 3.38578    | 2.74722   | 3.31534   | 3.90479   | 4.52452   |
| MAD2L2   | 2.94117  | 2.78509    | 2.77649   | 3.28349   | 3.03492   | 3.4632    |
| MADD     | 4.63127  | 4.46345    | 4.94059   | 5.07355   | 4.43837   | 3.92082   |
| MAEA     | 4.07323  | 4.09079    | 3.70978   | 4.15911   | 4.5947    | 4.9824    |
| MAF      | 2.03226  | 1.8272     | 2.05967   | 2.39103   | 4.18675   | 4.12142   |
| MAF1     | 4.23387  | 4.22628    | 4.24378   | 4.69691   | 4.97948   | 5.50637   |
| MAFB     | ?        | ?          | 2.00137   | 2.16265   | -1.20056  | -1.38442  |
| MAFF     | 3.53813  | 3.61797    | 1.70525   | 2.52055   | 0.749148  | 0.176042  |

|           |          |           |           |            |            |           |
|-----------|----------|-----------|-----------|------------|------------|-----------|
| MAFG      | 5.04666  | 4.91254   | 5.31517   | 5.59879    | 5.37388    | 4.78882   |
| MAFG-AS1  | 1.39372  | 1.23069   | 0.759062  | 1.04098    | -0.615709  | -0.848487 |
| MAFK      | 2.44724  | 2.44431   | 2.70638   | 3.16682    | 3.36295    | 3.04783   |
| MAG       | 3.5006   | 3.3429    | -4.59508  | -4.10635 ? | ?          |           |
| MAGEA1    | 4.61889  | 4.55117   | -1.65952  | -1.02108   | -4.65668   | -2.8983   |
| MAGEA10   | 5.45382  | 5.54194   | -5.1783   | -5.10387   | -4.65668   | -4.70296  |
| MAGEA12   | 5.64497  | 5.60055   | -6.17309  | -4.10635   | 6.05846    | 6.38392   |
| MAGEA2    | 4.58565  | 4.34025   | -5.1783   | -4.77239   | 4.01782    | 3.97268   |
| MAGEA2B   | 3.91868  | 4.31351 ? |           | -7.14238   | 3.7443     | 3.8744    |
| MAGEA3    | 6.24054  | 6.28502   | 0.210164  | 0.757074   | 2.40744    | 2.50269   |
| MAGEA6    | 6.19017  | 6.18466   | -1.54351  | -0.370764  | 6.27946    | 6.54408   |
| MAGEB17   | 2.12563  | 2.36386   | -4.59508  | -3.80198   | -4.65668 ? |           |
| MAGEC1    | 1.8934   | 1.38268   | -2.5977   | -5.10387   | -6.64581 ? |           |
| MAGED1    | 6.01127  | 5.89359   | 6.0958    | 6.37318    | 5.62479    | 5.65468   |
| MAGED2    | 5.93957  | 5.84775   | 5.11282   | 5.63894    | 4.80882    | 5.28622   |
| MAGED4    | 1.01716  | 0.622659  | 1.96441   | 2.32906    | 0.11274    | 0.560676  |
| MAGED4B   | 1.15719  | 0.998217  | 1.79055   | 2.11477    | 0.180784   | 0.596649  |
| MAGEF1    | 4.03647  | 3.99556   | 3.79804   | 4.04598    | 5.20309    | 5.08363   |
| MAGEH1    | 2.14014  | 1.89033   | 2.86088   | 3.04852    | -5.07051   | -4.11926  |
| MAGI1     | 2.77724  | 2.93652   | 2.23513   | 2.03172    | 1.41201    | 1.2732    |
| MAGI2     | 1.94375  | 1.89822   | -1.229    | -0.938639  | 2.19176    | 2.05296   |
| MAGI2-AS3 | 4.52026  | 4.55549   | -0.482896 | -0.464785  | 3.69162    | 3.95912   |
| MAGI3     | 3.82056  | 3.70206   | 4.41359   | 4.38702    | 5.29896    | 5.38867   |
| MAGOH     | 3.25074  | 3.32179   | 2.759     | 3.1391     | 3.24658    | 3.52211   |
| MAGOHB    | 3.77766  | 3.74173   | 3.60602   | 3.84827    | 3.29232    | 3.32671   |
| MAGT1     | 5.76034  | 5.97071   | 6.35682   | 6.86918    | 6.05881    | 6.33969   |
| MAK       | 0.146525 | 0.344613  | 0.636738  | 0.350701   | 0.480989   | -0.49244  |
| MAK16     | 5.58502  | 5.55162   | 4.29798   | 4.59543    | 5.82494    | 5.92911   |
| MALAT1    | 12.1966  | 11.7236   | 13.4103   | 13.0198    | 12.9598    | 12.262    |
| MALSU1    | 3.43404  | 3.34476   | 3.95593   | 4.30477    | 3.90914    | 4.24091   |
| MALT1     | 5.52967  | 5.61728   | 6.51669   | 6.84177    | 7.04885    | 7.21355   |
| MAMDC2    | -2.50222 | -1.45032  | -1.2763   | -2.07775   | 3.73764    | 3.59912   |
| MAMDC4    | 0.959318 | 0.614144  | 0.871828  | 0.491176   | -0.551587  | -1.38442  |
| MAML1     | 4.0798   | 4.036     | 4.85196   | 4.75767    | 4.82045    | 4.50152   |
| MAML2     | 4.31702  | 4.2315    | 5.0891    | 5.13791    | 5.13591    | 4.93714   |
| MAML3     | 4.53429  | 4.57173   | 0.919516  | 1.05962    | 2.26712    | 2.20619   |
| MAMLD1    | 2.02204  | 1.93806   | 1.52387   | 1.49112    | 1.85147    | 1.2122    |
| MAN1A1    | 3.52492  | 3.6535    | 2.19587   | 2.47239    | 4.40577    | 4.75885   |
| MAN1A2    | 6.42227  | 6.49152   | 5.97254   | 6.14028    | 7.55417    | 7.58762   |
| MAN1B1    | 5.48018  | 5.42931   | 5.17292   | 5.44142    | 5.14865    | 5.26121   |
| MAN2A1    | 6.0145   | 5.90265   | 5.47914   | 5.55294    | 6.72607    | 6.92786   |
| MAN2A2    | 5.23638  | 5.08083   | 4.23311   | 4.30705    | 4.03952    | 3.35287   |
| MAN2B1    | 4.25743  | 3.97097   | 4.16851   | 4.03997    | 4.00284    | 3.67138   |
| MAN2B2    | 3.03563  | 3.15738   | 4.12254   | 4.3434     | 4.49261    | 4.37543   |
| MAN2C1    | 4.26335  | 4.05544   | 4.44686   | 4.55743    | 4.23225    | 3.68438   |
| MANBA     | 4.38904  | 4.53008   | 3.60275   | 3.91076    | 3.21927    | 3.17899   |
| MANBAL    | 4.51281  | 4.32585   | 3.51345   | 3.66595    | 3.80424    | 3.69843   |
| MANEA     | 3.52853  | 3.63256   | 3.39202   | 3.51689    | 4.2269     | 4.26194   |
| MANEAL    | 3.45235  | 3.45021   | 3.08171   | 3.32987    | 3.29335    | 3.63741   |
| MANF      | 5.96178  | 5.80334   | 5.06499   | 5.52416    | 5.35089    | 5.34313   |
| MANSC1    | 2.89897  | 2.99454   | -0.095919 | 0.46112    | 3.34531    | 3.98503   |
| MAOA      | 2.52252  | 2.38891   | -1.65952  | -0.751045  | -4.33548   | -4.70296  |

|             |            |           |           |           |            |           |
|-------------|------------|-----------|-----------|-----------|------------|-----------|
| MAP1A       | 3.26958    | 3.13893   | 2.54781   | 3.30269   | 5.16424    | 5.0974    |
| MAP1B       | 7.94612    | 8.42287   | 8.81607   | 9.32945   | 9.86495    | 10.0325   |
| MAP1LC3A    | 1.78476    | 1.31199   | 1.12941   | 1.30061   | 1.73203    | 1.75275   |
| MAP1LC3B    | 4.36675    | 4.23916   | 4.61822   | 5.01336   | 4.30587    | 4.47011   |
| MAP1LC3B2   | 1.93155    | 1.76687   | 2.11558   | 2.56694   | 1.89993    | 2.06467   |
| MAP1S       | 1.08887    | 0.859151  | 1.2174    | 1.34243   | 1.3621     | 1.91536   |
| MAP2        | 0.994464   | 1.31856   | 4.90326   | 5.13731   | 6.26544    | 5.69256   |
| MAP2K1      | 4.16771    | 4.31639   | 4.20669   | 4.62972   | 5.40915    | 5.171     |
| MAP2K1P1    | 0.0283428  | 0.600374  | 0.282143  | 0.69562   | 1.5194     | 1.26448   |
| MAP2K2      | 4.54613    | 4.2222    | 3.83642   | 4.16416   | 5.61469    | 5.27689   |
| MAP2K3      | 3.83327    | 3.69071   | 3.1111    | 3.48362   | 3.41917    | 3.02121   |
| MAP2K4      | 4.27276    | 4.27978   | 4.50882   | 4.85177   | 5.24176    | 5.45518   |
| MAP2K4P1    | -0.262824  | -0.166064 | 0.0701145 | 0.713669  | 0.937744   | 1.11078   |
| MAP2K5      | 1.75628    | 1.62465   | 1.46757   | 1.49112   | 1.50965    | 1.97981   |
| MAP2K6      | 1.53936    | 1.73194   | 2.32429   | 2.32998   | 3.05222    | 3.45568   |
| MAP2K7      | 2.54649    | 2.13336   | 2.29627   | 2.11036   | 3.24508    | 2.84404   |
| MAP3K1      | 5.4269     | 5.62177   | 5.93341   | 6.0414    | 6.0715     | 5.67308   |
| MAP3K10     | 2.03565    | 1.65613   | 1.48894   | 1.47617   | 1.85542    | 1.33772   |
| MAP3K11     | 5.32502    | 5.08259   | 4.07504   | 4.241     | 4.04012    | 3.90983   |
| MAP3K12     | 4.15582    | 4.14943   | 4.6474    | 4.83117   | 3.46762    | 3.60356   |
| MAP3K13     | 3.2782     | 3.28714   | 4.01105   | 4.06803   | 5.1478     | 4.82794   |
| MAP3K14     | 2.65679    | 2.40516   | 4.5959    | 4.62915   | 4.6869     | 4.05008   |
| MAP3K14-AS1 | 0.0793884  | 0.057166  | 1.96296   | 2.07175   | 1.24489    | 0.830385  |
| MAP3K2      | 6.002      | 6.16355   | 5.56257   | 5.85371   | 6.75753    | 6.87895   |
| MAP3K3      | 4.10267    | 3.78554   | 4.34264   | 4.52152   | 3.87026    | 3.46942   |
| MAP3K4      | 5.24595    | 5.14863   | 4.3459    | 4.53409   | 6.50682    | 6.5867    |
| MAP3K5      | 2.75625    | 2.49427   | 2.81366   | 3.46672   | 3.27927    | 3.55773   |
| MAP3K6      | 1.82842    | 1.7708    | 1.48185   | 1.67257   | 2.06763    | 1.95152   |
| MAP3K7      | 5.80323    | 5.98785   | 4.867     | 5.14619   | 5.64856    | 5.81978   |
| MAP3K8      | -0.395124  | -0.39658  | 2.40521   | 2.56361   | -0.217212  | 0.247587  |
| MAP3K9      | 3.71031    | 3.51729   | 3.17404   | 3.17889   | 3.71256    | 2.93354   |
| MAP4        | 7.09254    | 6.97322   | 6.64936   | 6.69512   | 7.32753    | 7.26197   |
| MAP4K2      | 3.56654    | 3.48989   | 2.47113   | 2.62928   | 2.9209     | 2.64644   |
| MAP4K3      | 3.81958    | 3.81094   | 4.06677   | 4.26946   | 4.70217    | 4.61069   |
| MAP4K4      | 7.51772    | 7.55318   | 6.95921   | 7.23408   | 7.35071    | 6.8714    |
| MAP4K5      | 5.382      | 5.38648   | 3.88511   | 4.18004   | 4.90241    | 4.91716   |
| MAP6D1      | 0.243547   | 0.223769  | 0.340141  | 0.213217  | 2.01567    | 1.48315   |
| MAP7D1      | 4.52008    | 4.32831   | 4.71809   | 4.93555   | 5.5775     | 5.47815   |
| MAP7D3      | 0.595618   | 0.71714   | 3.84439   | 4.2867    | 4.43178    | 4.56591   |
| MAP9        | -5.69162 ? |           | 2.25683   | 2.3864    | 3.39292    | 4.15936   |
| MAPK1       | 6.40731    | 6.83891   | 5.64896   | 6.29871   | 5.70025    | 6.1305    |
| MAPK10      | -2.05464   | -2.29223  | -0.276471 | -0.899117 | 1.96542    | 2.70269   |
| MAPK11      | 2.52975    | 2.40135   | 3.50299   | 3.50956   | -0.753191  | -0.619042 |
| MAPK12      | 3.91045    | 3.57618   | 4.85648   | 4.76822   | 1.88788    | 1.77871   |
| MAPK14      | 5.27104    | 5.15277   | 5.37008   | 5.61354   | 5.32764    | 5.19943   |
| MAPK1IP1L   | 5.74489    | 5.76716   | 4.6068    | 4.83515   | 5.72203    | 5.46697   |
| MAPK3       | 3.17129    | 3.0068    | 3.45491   | 3.73353   | 3.06421    | 3.14504   |
| MAPK6       | 6.12376    | 6.34495   | 5.43551   | 6.04457   | 6.76883    | 7.20085   |
| MAPK6PS3    | 0.714628   | 0.825965  | 0.602153  | 0.595446  | 0.00219123 | 0.383596  |
| MAPK7       | 2.10283    | 1.80203   | 2.67244   | 2.73297   | 2.65132    | 2.20002   |
| MAPK8       | 3.88023    | 4.27609   | 3.85813   | 4.10791   | 4.01652    | 4.89412   |
| MAPK8IP1    | 1.82396    | 1.36375   | 1.84441   | 1.94621   | 3.76685    | 3.2181    |

|              |          |            |           |           |             |            |
|--------------|----------|------------|-----------|-----------|-------------|------------|
| MAPK8IP3     | 4.25438  | 3.92409    | 4.58878   | 4.36487   | 4.18203     | 3.36475    |
| MAPK9        | 4.27174  | 4.01692    | 5.15799   | 5.12298   | 4.92136     | 4.84114    |
| MAPKAP1      | 5.01731  | 4.98216    | 4.59701   | 4.81375   | 5.51928     | 5.83389    |
| MAPKAPK2     | 4.88776  | 4.5692     | 4.81152   | 4.90659   | 5.10908     | 4.4443     |
| MAPKAPK3     | 3.79177  | 3.80861    | 1.88259   | 2.73667   | 3.76806     | 4.03474    |
| MAPKAPK5     | 4.73669  | 4.71091    | 4.50979   | 4.48894   | 4.08855     | 3.72899    |
| MAPKAPK5-AS1 | 2.46962  | 2.44253    | 2.32201   | 2.73927   | 2.21281     | 2.50477    |
| MAPKBP1      | 4.22394  | 4.28574    | 3.64936   | 3.88949   | 3.80573     | 3.27057    |
| MAPRE1       | 6.70747  | 6.69538    | 6.3703    | 6.71052   | 6.53237     | 6.67827    |
| MAPRE1P1     | 0.721346 | 0.9152     | 0.137608  | 0.178594  | 0.619751    | 0.706128   |
| MAPRE2       | 4.22127  | 4.19893    | 4.53328   | 4.72247   | 4.51398     | 4.26195    |
| MAPRE3       | 2.07243  | 1.96344    | 2.45311   | 2.38704   | 2.63662     | 2.48805    |
| MAPT         | 3.31773  | 3.24969    | 1.71738   | 1.42259   | -0.00196773 | -1.006     |
| MARCH1       | 2.94298  | 3.07632    | 2.66823   | 2.67255   | 4.18752     | 4.11347    |
| MARCH2       | 1.44051  | 1.2583     | 0.759062  | 1.02051   | 2.2734      | 2.56476    |
| MARCH3       | 2.16822  | 2.12589    | 0.292311  | 0.82198   | 2.11778     | 2.49787    |
| MARCH5       | 3.40159  | 3.34772    | 3.11569   | 3.19724   | 4.10704     | 4.22992    |
| MARCH6       | 6.33917  | 6.44797    | 7.0152    | 7.07973   | 6.7869      | 6.74321    |
| MARCH7       | 6.09784  | 6.20444    | 6.19232   | 6.28324   | 6.11677     | 6.29074    |
| MARCH8       | 3.22721  | 3.55256    | 1.63029   | 2.14386   | 3.25108     | 3.57636    |
| MARCH9       | 2.51282  | 2.51445    | 2.69913   | 2.8996    | 2.57811     | 2.70269    |
| MARCKS       | 5.53393  | 5.55674    | 6.00385   | 6.17831   | 8.29412     | 8.1503     |
| MARCKSL1     | 5.05246  | 4.7466     | 3.51865   | 3.36488   | 4.8539      | 4.19264    |
| MARK1        | 0.710384 | 0.676782 ? | ?         |           | 2.68621     | 2.54122    |
| MARK2        | 3.84684  | 3.75633    | 3.29828   | 3.27704   | 3.31123     | 3.10386    |
| MARK3        | 5.90824  | 5.92462    | 4.66509   | 4.73665   | 5.70409     | 5.69309    |
| MARK4        | 1.94119  | 1.50873    | 2.83608   | 2.85696   | 2.67955     | 2.29893    |
| MARS         | 5.93764  | 5.99263    | 5.83605   | 6.40275   | 6.56321     | 6.39378    |
| MARS2        | 3.5677   | 3.71954    | 1.38638   | 1.97335   | 3.10622     | 3.51245    |
| MARVELD1     | 4.80919  | 4.7183     | 3.91055   | 3.93008   | 3.53321     | 3.66397    |
| MASP1        | ?        | -6.45019   | 2.64938   | 3.55652   | -5.65305    | -4.70296   |
| MASP2        | 0.312247 | -0.105152  | 0.636738  | 0.563685  | 0.947083    | -0.0341529 |
| MAST2        | 4.65736  | 4.48552    | 5.16354   | 5.25638   | 4.99207     | 4.5982     |
| MAST3        | 1.45575  | 0.843622   | 2.42563   | 1.97542   | 1.98628     | 0.893261   |
| MAST4        | 0.915689 | 0.988427   | -1.2763   | -0.979274 | 2.5221      | 2.74862    |
| MASTL        | 4.88082  | 4.87626    | 4.22749   | 4.40654   | 4.38563     | 4.56916    |
| MAT2A        | 7.06483  | 6.98119    | 7.10446   | 7.23413   | 6.80268     | 6.76756    |
| MAT2B        | 3.52733  | 4.36686    | 4.20126   | 5.42498   | 3.91333     | 5.64311    |
| MATN1-AS1    | 0.945188 | 1.08186    | 0.0533199 | 0.0992548 | -0.379337   | -0.44602   |
| MATN2        | 5.20705  | 5.87366    | 3.32823   | 3.62249   | 3.46768     | 4.69416    |
| MATN3        | 1.34536  | 1.95081    | 0.340141  | 1.08105   | -5.07051    | -3.70484   |
| MATR3        | 8.11503  | 8.21685    | 7.90523   | 8.04913   | 8.19994     | 8.3805     |
| MAU2         | 4.22053  | 4.22803    | 4.17402   | 4.39101   | 5.0014      | 4.90431    |
| MAVS         | 5.78571  | 5.53538    | 6.83257   | 7.22586   | 6.18182     | 6.11466    |
| MAX          | 3.97355  | 3.92812    | 3.06911   | 3.34755   | 3.46305     | 3.35524    |
| MAZ          | 5.85382  | 5.78863    | 4.90329   | 5.0102    | 6.22349     | 6.05119    |
| MB21D2       | 2.62286  | 2.78034    | 1.7234    | 1.86848   | 3.95348     | 3.59249    |
| MBD1         | 4.79026  | 4.73005    | 3.94318   | 4.19038   | 3.89906     | 3.73416    |
| MBD2         | 4.98653  | 5.03251    | 4.34297   | 4.88552   | 4.07863     | 4.1881     |
| MBD3         | 4.45574  | 3.86359    | 3.98766   | 3.85552   | 5.10497     | 5.18125    |
| MBD4         | 3.87361  | 3.90238    | 4.25734   | 4.5724    | 4.50585     | 4.51848    |
| MBD5         | 3.86249  | 3.74826    | 4.02668   | 3.8172    | 4.28242     | 3.95408    |

|            |          |           |           |            |           |           |
|------------|----------|-----------|-----------|------------|-----------|-----------|
| MBD6       | 1.47588  | 1.16656   | 2.48183   | 2.17196    | 1.9581    | 1.54125   |
| MBIP       | 2.20181  | 2.16653   | 2.25944   | 2.35062    | 2.57811   | 2.85935   |
| MBLAC2     | 2.36433  | 2.456     | 2.55027   | 2.5169     | 2.99969   | 2.95507   |
| MBNL1      | 6.43707  | 6.49903   | 7.04927   | 7.35109    | 7.21998   | 7.16663   |
| MBNL2      | 5.9909   | 6.02121   | 5.22374   | 5.41619    | 5.48304   | 5.70955   |
| MBNL3      | 3.17437  | 3.35253   | 3.58135   | 3.53142    | 3.36205   | 3.9043    |
| MBOAT1     | 1.93394  | 1.99661   | 2.00632   | 2.06112    | 1.59711   | 1.88577   |
| MBOAT2     | 4.55712  | 4.98113   | 5.52512   | 6.01399    | 4.30907   | 5.18885   |
| MBOAT7     | 4.62679  | 4.57676   | 4.89194   | 5.1073     | 4.89234   | 5.00235   |
| MBP        | 0.16579  | -0.118594 | 0.138526  | -0.0869685 | 2.62279   | 2.35398   |
| MBTD1      | 4.38772  | 4.24623   | 4.30229   | 4.09696    | 4.2704    | 3.74037   |
| MBTPS1     | 6.37857  | 6.39183   | 6.12396   | 6.4479     | 5.69831   | 5.70532   |
| MBTPS2     | 3.444    | 3.37337   | 4.64944   | 4.7463     | 3.35942   | 3.65444   |
| MC1R       | 3.01157  | 2.94623   | 1.41191   | 1.83045    | 0.52295   | 0.80719   |
| MCAM       | 7.83761  | 6.88644   | 4.56885   | 4.61907    | 5.0539    | 4.80107   |
| MCAT       | 2.6803   | 2.70458   | 2.30433   | 2.65937    | 2.31699   | 2.32121   |
| MCC        | 5.28958  | 5.39513   | 3.25111   | 3.1835     | 7.20633   | 7.10868   |
| MCCC1      | 2.99441  | 3.10701   | 3.80941   | 4.26403    | 4.04272   | 4.46696   |
| MCCC2      | 4.18126  | 4.39435   | 4.62222   | 4.94712    | 5.0323    | 5.18507   |
| MCEE       | 0.710384 | 0.537236  | 1.00636   | 1.46107    | 1.06767   | 1.48315   |
| MCF2L      | -3.8896  | -2.37465  | 2.60765   | 3.0933 ?   | ?         |           |
| MCFD2      | 7.42605  | 7.18592   | 7.43444   | 7.82416    | 7.56724   | 7.9583    |
| MCL1       | 8.2      | 8.09869   | 6.60074   | 6.83254    | 7.41707   | 7.13465   |
| MCM10      | 5.47961  | 5.61498   | 4.05368   | 4.22096    | 4.45798   | 4.40311   |
| MCM2       | 6.17285  | 5.96942   | 5.50865   | 5.72484    | 5.57629   | 5.5082    |
| MCM3       | 6.71563  | 6.74364   | 5.9917    | 6.38226    | 6.84833   | 6.69121   |
| MCM3AP     | 5.46823  | 5.4988    | 6.23968   | 6.34542    | 5.75751   | 5.52787   |
| MCM3AP-AS1 | 2.99349  | 3.15996   | 3.67427   | 3.65618    | 2.95051   | 2.54987   |
| MCM4       | 7.08108  | 7.11813   | 6.45196   | 6.74837    | 6.43341   | 6.41319   |
| MCM5       | 6.14008  | 6.05285   | 5.40846   | 5.72603    | 4.95758   | 5.03727   |
| MCM6       | 6.10504  | 6.03498   | 4.6822    | 4.75922    | 5.24243   | 5.34244   |
| MCM7       | 7.89327  | 7.91377   | 6.55435   | 6.99959    | 6.91015   | 7.09195   |
| MCM8       | 5.93003  | 6.05308   | 5.94024   | 6.06797    | 5.91024   | 5.48246   |
| MCM9       | 3.26987  | 3.5161    | 3.02157   | 3.40212    | 3.9928    | 3.93649   |
| MCMBP      | 5.77512  | 5.91756   | 5.29424   | 5.78861    | 5.67895   | 6.07258   |
| MCMDC2     | 0.600365 | 0.65817   | -0.243151 | -0.742207  | 0.084037  | -0.111114 |
| MCOLN1     | 2.35358  | 2.06894   | 1.79779   | 2.14437    | 2.35033   | 2.04436   |
| MCOLN2     | 2.73764  | 2.27526   | 4.21735   | 4.48828    | 4.48244   | 5.10866   |
| MCOLN3     | 1.39372  | 1.30539   | 2.68067   | 2.894      | -0.152369 | -0.247125 |
| MCPH1      | 4.26944  | 4.34235   | 3.88063   | 4.05592    | 4.18117   | 4.19207   |
| MCRS1      | 4.7256   | 4.61463   | 3.73831   | 3.96397    | 4.23904   | 4.5221    |
| MCTP1      | 3.96714  | 4.07145   | 2.28002   | 2.04601    | 2.70383   | 2.96218   |
| MCTP2      | 0.959191 | 0.794611  | 4.32129   | 4.75844    | -2.95876  | -2.70579  |
| MCTS1      | 2.57006  | 2.61047   | 3.52436   | 4.16697    | 4.57367   | 5.46939   |
| MCTS2P     | 0.795027 | 0.513905  | 1.31386   | 1.3644     | 1.34276   | 1.14893   |
| MCU        | 3.64965  | 3.60056   | 2.90924   | 3.0686     | 4.14301   | 4.59248   |
| MCUR1      | 3.55595  | 3.80604   | 3.13195   | 3.54939    | 4.07288   | 4.6309    |
| MDC1       | 4.73622  | 4.52512   | 4.63018   | 4.46007    | 4.732     | 4.24893   |
| MDFIC      | 4.60297  | 4.71397   | 3.97634   | 4.0933     | 3.84253   | 3.70692   |
| MDGA1      | 0.595618 | 0.344613  | 3.11798   | 3.47614    | 2.18833   | 3.49541   |
| MDH1       | 6.24745  | 6.37339   | 5.56715   | 6.04976    | 6.44395   | 7.28265   |
| MDH2       | 6.06786  | 6.02424   | 5.60395   | 5.95184    | 6.53631   | 6.61662   |

|         |          |           |           |           |           |           |
|---------|----------|-----------|-----------|-----------|-----------|-----------|
| MDK     | 3.57587  | 2.58429   | 5.54611   | 5.32214   | 2.91524   | 2.2062    |
| MDM1    | 3.21978  | 3.29871   | 3.46213   | 3.38102   | 3.23754   | 3.15127   |
| MDM2    | 7.77514  | 7.54127   | 5.13022   | 5.3456    | 6.33742   | 5.7994    |
| MDM4    | 6.3262   | 6.22473   | 5.57052   | 5.26023   | 6.11796   | 5.29046   |
| MDN1    | 7.58528  | 7.55821   | 6.50081   | 6.61731   | 6.95311   | 6.51419   |
| MDP1    | 0.605893 | 0.914733  | 0.1424    | 0.940159  | 0.700005  | 2.35291   |
| ME1     | 4.55003  | 4.38107   | -2.72315  | -2.93781  | -1.30241  | -0.752286 |
| ME2     | 5.21077  | 5.39304   | 3.75718   | 4.04599   | 3.84351   | 4.35263   |
| ME2P1   | 0.930949 | 1.13241   | -0.396005 | -0.301307 | -0.572647 | -0.619042 |
| ME3     | ?        | -5.45651  | -4.59508  | -4.52056  | 1.63893   | 1.50278   |
| MEA1    | 4.51798  | 4.67377   | 4.2116    | 4.82084   | 5.92719   | 6.10658   |
| MEAF6   | 4.09614  | 4.20514   | 3.30432   | 3.64104   | 4.02531   | 4.10385   |
| MECOM   | 2.68031  | 2.88146   | 4.07739   | 4.48922   | 2.75332   | 3.42257   |
| MECP2   | 4.92708  | 4.92031   | 5.04288   | 5.23268   | 5.4625    | 5.56416   |
| MECR    | 2.71032  | 2.66128   | 2.08328   | 2.61228   | 2.7234    | 3.0178    |
| MED1    | 5.58166  | 5.92648   | 5.37394   | 5.76884   | 5.60298   | 5.77456   |
| MED10   | 2.54648  | 2.47381   | 2.52385   | 2.76155   | 2.79913   | 2.93354   |
| MED11   | 2.02884  | 1.77257   | 2.16964   | 2.11922   | 2.67071   | 2.99466   |
| MED12   | 4.09125  | 4.03799   | 4.25838   | 4.24872   | 4.11447   | 3.92446   |
| MED12L  | 2.7404   | 2.54359   | -1.62436  | -1.8311   | 3.55754   | 3.43703   |
| MED13   | 7.18278  | 7.0995    | 6.91007   | 7.023     | 7.63498   | 7.24348   |
| MED13L  | 6.39464  | 6.14964   | 5.79022   | 5.68455   | 6.39027   | 5.81407   |
| MED14   | 5.17397  | 5.08837   | 5.24116   | 5.14796   | 4.79706   | 4.57868   |
| MED15   | 5.00925  | 4.85617   | 4.49943   | 4.72247   | 4.34154   | 4.1754    |
| MED16   | 1.9769   | 1.62994   | 2.31235   | 2.29207   | 2.77641   | 3.16365   |
| MED17   | 3.45952  | 3.57469   | 4.23853   | 4.33512   | 4.26581   | 4.33083   |
| MED18   | 2.66725  | 2.61398   | 2.03567   | 2.2792    | 2.9209    | 3.11983   |
| MED19   | 2.26094  | 2.32507   | 2.25112   | 2.38304   | 2.70384   | 2.90432   |
| MED20   | 3.55121  | 3.53574   | 3.57304   | 3.89679   | 4.4225    | 4.70479   |
| MED21   | 3.76035  | 3.83061   | 3.65725   | 4.05229   | 3.99341   | 4.41351   |
| MED22   | 4.31702  | 4.23063   | 3.91316   | 4.05355   | 3.84847   | 3.56474   |
| MED23   | 4.07324  | 4.2315    | 4.22692   | 4.44192   | 4.84001   | 4.81587   |
| MED24   | 3.71877  | 3.71831   | 3.77792   | 3.94509   | 4.21236   | 4.0958    |
| MED25   | 1.78964  | 1.65406   | 2.38593   | 2.49955   | 2.23354   | 1.89856   |
| MED26   | 1.77476  | 1.70478   | 1.77403   | 1.64488   | 2.36093   | 1.86342   |
| MED27   | 2.48139  | 2.51279   | 2.31198   | 2.89831   | 2.30882   | 2.6564    |
| MED28   | 4.97388  | 4.74615   | 4.80013   | 4.70331   | 5.4385    | 4.80571   |
| MED29   | 3.93664  | 3.90785   | 4.03322   | 4.36792   | 4.84747   | 4.84209   |
| MED30   | 1.98042  | 1.86361   | 1.37876   | 1.70499   | 1.2101    | 1.62424   |
| MED31   | 2.7889   | 2.93343   | 2.44194   | 3.05008   | 3.39302   | 4.67198   |
| MED4    | 3.6031   | 3.80965   | 3.24659   | 3.54513   | 3.40428   | 3.78262   |
| MED6    | 3.74283  | 3.72574   | 2.87448   | 3.081     | 3.55036   | 3.90799   |
| MED7    | 2.51525  | 2.59244   | 3.19152   | 3.1603    | 3.17416   | 3.83826   |
| MED8    | 4.47656  | 4.21034   | 4.58305   | 4.78282   | 4.77058   | 4.89933   |
| MED9    | 2.7035   | 2.62728   | 3.136     | 3.41266   | 3.26553   | 3.18352   |
| MEF2A   | 5.27946  | 5.41296   | 4.07523   | 4.26513   | 4.22616   | 4.61825   |
| MEF2BNB | 2.66276  | 2.51496   | 2.42651   | 2.50621   | 3.23432   | 3.20831   |
| MEF2C   | 3.60013  | 3.29654   | -1.43719  | -1.41436  | 4.08985   | 4.33877   |
| MEF2D   | 3.25367  | 2.80629   | 3.35758   | 3.25531   | 2.99433   | 2.52692   |
| MEG3    | ?        | ?         | 2.18718   | 2.97599   | 1.34536   | 0.863209  |
| MEGF10  | 2.96981  | 3.05088 ? | ?         | ?         | -0.959604 | -1.79933  |
| MEGF11  | 1.76856  | 1.71211   | 1.58469   | 1.25754   | 1.29393   | 0.97985   |

|           |           |           |            |           |          |           |
|-----------|-----------|-----------|------------|-----------|----------|-----------|
| MEGF8     | 5.07035   | 4.51587   | 4.54524    | 4.30374   | 4.48432  | 4.29188   |
| MEGF9     | 3.74179   | 3.6299    | 4.17951    | 4.19723   | 3.92277  | 3.59021   |
| MEIS1     | 3.82833   | 3.39289   | 4.85569    | 4.56258   | 3.44831  | 3.1378    |
| MEIS2     | 3.99183   | 3.80204   | 4.58773    | 4.04212   | 3.87297  | 3.9022    |
| MEIS3     | 1.63024   | 0.807874  | 2.56586    | 2.4105    | 1.54304  | 2.01507   |
| MELK      | 4.89756   | 4.84719   | 4.57469    | 4.93624   | 5.74694  | 5.87682   |
| MEMO1     | 3.5335    | 3.41366   | 2.47575    | 2.91418   | 4.02753  | 4.3269    |
| MEMO1P1   | 2.37462   | 2.66344   | 1.55846    | 1.83076   | 3.09679  | 3.4026    |
| MEN1      | 4.21755   | 4.07147   | 3.41824    | 3.5968    | 2.95256  | 2.82857   |
| MEPCE     | 4.60384   | 4.55729   | 3.31745    | 3.85209   | 4.39407  | 4.53278   |
| MERTK     | -3.37567  | -4.45968  | 0.416483   | 0.213217  | 1.74486  | 1.25912   |
| MESDC1    | 2.66944   | 2.97387   | 1.83331    | 1.71775   | 1.63434  | 1.71117   |
| MESDC2    | 5.63939   | 5.77493   | 5.6347     | 6.05867   | 5.48402  | 5.59764   |
| MEST      | -1.8123   | -2.37465  | 3.84081    | 4.14124   | 4.6988   | 5.65129   |
| MESTP1    | ?         | ?         | 0.0166532  | 0.103383  | 0.958033 | 1.82306   |
| MET       | 6.16664   | 6.69496   | 6.58091    | 7.23226   | 6.73143  | 6.88149   |
| METAP1    | 4.73936   | 4.85947   | 4.3055     | 4.64208   | 4.49065  | 4.88015   |
| METAP1D   | 2.64966   | 2.62728   | 2.08328    | 2.13437   | 2.54427  | 2.47321   |
| METAP2    | 6.05829   | 6.21419   | 5.15465    | 5.65271   | 5.91405  | 6.1427    |
| METRN     | 3.08228   | 2.42895   | 2.86633    | 2.97066   | 3.39497  | 3.92082   |
| METRNL    | 1.69756   | 1.38894   | 2.15189    | 2.66267   | 0.258664 | -0.280287 |
| METTL1    | 1.74106   | 1.8296    | 1.56462    | 2.0972    | 1.95069  | 2.06955   |
| METTL10   | 3.08893   | 3.1658    | 3.28513    | 3.39943   | 3.46952  | 3.68026   |
| METTL12   | 3.29146   | 3.38395   | 2.17225    | 2.21705   | 2.39477  | 2.41234   |
| METTL13   | 5.18126   | 5.09651   | 3.60111    | 3.88976   | 4.47282  | 4.45693   |
| METTL14   | 3.76955   | 3.82486   | 3.65568    | 3.77535   | 3.81034  | 4.20168   |
| METTL15   | 2.84752   | 2.70884   | 3.22413    | 3.34805   | 3.72285  | 3.59178   |
| METTL15P1 | 1.43106   | 1.66288   | 1.72232    | 1.66104   | 0.859493 | 1.22777   |
| METTL16   | 4.06579   | 4.16102   | 4.23896    | 4.52325   | 4.56849  | 4.3634    |
| METTL17   | 4.45305   | 4.4144    | 3.71376    | 3.9588    | 4.20756  | 4.18296   |
| METTL18   | 2.48551   | 2.51695   | 1.74725    | 2.04601   | 1.56854  | 2.30453   |
| METTL20   | 0.936485  | 0.856189  | 1.25917    | 1.34562   | 0.554638 | 0.507536  |
| METTL21A  | 2.94722   | 3.02161   | 2.1517     | 2.4201    | 3.19959  | 3.37735   |
| METTL21B  | 0.829898  | 1.21244   | 1.72868    | 2.29446   | 2.10442  | 2.11138   |
| METTL22   | 2.74179   | 2.47086   | 3.15187    | 3.081     | 2.0332   | 1.56945   |
| METTL23   | 3.97423   | 3.94654   | 3.53072    | 3.66596   | 4.13166  | 4.60956   |
| METTL25   | 0.93073   | 0.808171  | -0.0865395 | -0.397277 | 0.695655 | 1.27395   |
| METTL2A   | 4.17052   | 4.26078   | 3.2805     | 3.56327   | 4.57615  | 4.86372   |
| METTL2B   | 4.96581   | 5.05262   | 4.321      | 4.59995   | 5.30959  | 5.32036   |
| METTL3    | 4.98599   | 5.00194   | 3.66968    | 3.89265   | 4.92824  | 4.78817   |
| METTL4    | 2.32884   | 2.38892   | 2.59785    | 2.77688   | 3.34391  | 3.76496   |
| METTL5    | 3.519     | 3.63536   | 3.04059    | 3.40887   | 3.73576  | 4.6909    |
| METTL6    | 3.04161   | 3.12024   | 2.40521    | 2.64607   | 3.35667  | 3.78631   |
| METTL7A   | -0.289526 | -0.418271 | 4.24902    | 4.3237    | 4.33048  | 4.47692   |
| METTL8    | 4.20614   | 4.44777   | 3.68838    | 3.93928   | 4.01475  | 4.35743   |
| METTL9    | 4.94521   | 5.05312   | 5.06264    | 5.35264   | 4.96448  | 5.39788   |
| MEX3A     | 4.39895   | 4.02499   | 3.32229    | 2.76154   | 3.13573  | 2.27058   |
| MEX3B     | 0.377835  | 0.20969   | 0.966283   | 0.95732   | 0.246688 | 0.270672  |
| MEX3C     | 6.54222   | 6.92732   | 3.95602    | 4.18808   | 3.65258  | 3.99372   |
| MEX3D     | 1.88215   | 1.73686   | 1.95605    | 2.04094   | 3.03318  | 2.75273   |
| MFAP1     | 4.55594   | 4.60793   | 4.13388    | 4.26186   | 5.16545  | 5.03642   |
| MFAP3     | 4.67703   | 4.67541   | 4.8326     | 5.02366   | 5.24805  | 5.4005    |

|         |          |           |          |          |           |           |
|---------|----------|-----------|----------|----------|-----------|-----------|
| MFAP3L  | 3.93021  | 3.82012   | -3.85951 | -4.52056 | 4.40771   | 4.29457   |
| MFF     | 5.02445  | 5.00978   | 4.88764  | 5.17115  | 5.86536   | 6.17657   |
| MFGE8   | 4.84636  | 4.60928   | 5.20448  | 5.21984  | 1.25263   | 0.847941  |
| MFHAS1  | 3.99004  | 3.8375    | 3.42935  | 3.3258   | 4.09791   | 3.80503   |
| MFI2    | 4.04154  | 3.95606   | 1.61741  | 1.60545  | 1.18523   | 1.24753   |
| MFN1    | 5.01377  | 5.06694   | 5.40501  | 5.67651  | 5.95521   | 6.35021   |
| MFN2    | 5.74536  | 5.57984   | 5.63503  | 6.02855  | 6.76814   | 6.48096   |
| MFSD1   | 4.37014  | 4.34443   | 4.56444  | 5.10183  | 4.83945   | 5.39587   |
| MFSD10  | 2.97158  | 2.85457   | 2.68067  | 2.83663  | 3.59118   | 3.52691   |
| MFSD11  | 3.73931  | 3.69568   | 3.67597  | 3.94888  | 3.73606   | 4.1473    |
| MFSD12  | 7.4017   | 7.02854   | 3.60307  | 3.58598  | 5.41395   | 5.03278   |
| MFSD1P1 | 0.40317  | 0.0931274 | 0.979089 | 1.0909   | 0.57974   | 0.15243   |
| MFSD2A  | 3.08064  | 2.82718   | 0.64945  | 1.36695  | 4.2917    | 3.59935   |
| MFSD3   | 1.51528  | 0.794611  | 1.43857  | 1.86274  | 1.61119   | 2.0482    |
| MFSD4   | 0.436204 | 0.332943  | 0.514461 | 0.238506 | -0.219472 | -0.519441 |
| MFSD5   | 3.76649  | 3.81676   | 3.14291  | 3.70175  | 3.55401   | 3.97277   |
| MFSD6   | 3.08064  | 3.54837   | 3.64461  | 4.48269  | 5.15386   | 5.6563    |
| MFSD8   | 2.9823   | 3.3732    | 3.14515  | 3.52416  | 3.08661   | 3.50526   |
| MFSD9   | 3.19574  | 3.31851   | 2.99639  | 3.24432  | 2.96905   | 2.66834   |
| MGA     | 6.29968  | 6.131     | 5.16077  | 5.12347  | 6.00035   | 5.71586   |
| MGAM2   | 3.71561  | 3.82486   | -5.1783  | -6.09892 | -5.65305  | -4.70296  |
| MGAT1   | 4.68516  | 4.46567   | 5.49859  | 5.7909   | 5.532     | 5.7972    |
| MGAT2   | 2.89799  | 2.53042   | 2.19498  | 2.13923  | 2.47094   | 3.37255   |
| MGAT4A  | -2.05464 | -2.21426  | 2.87988  | 3.27272  | 1.30552   | 1.37014   |
| MGAT4B  | 5.65008  | 5.21406   | 5.51726  | 5.50886  | 5.66117   | 5.49249   |
| MGAT5   | 6.88583  | 6.82968   | 5.75639  | 5.67336  | 5.01343   | 4.68668   |
| MGAT5B  | 2.56537  | 2.47381   | 1.99641  | 2.02048  | 2.88852   | 2.919     |
| MGEA5   | 5.24232  | 5.33073   | 6.17924  | 6.32242  | 6.63218   | 6.4729    |
| MGLL    | 5.41821  | 5.56745   | 2.88795  | 3.42256  | 0.405873  | 0.736302  |
| MGME1   | 4.51948  | 4.3144    | 4.19586  | 4.26185  | 4.16225   | 4.29749   |
| MGP     | 0.727258 | -0.93902  | 2.38255  | 1.46107  | -0.136604 | -2.24661  |
| MGRN1   | 2.99789  | 2.78034   | 3.20234  | 3.21985  | 2.83355   | 2.6899    |
| MGST1   | 3.81662  | 4.04791   | 5.94059  | 6.39299  | 6.41899   | 6.76369   |
| MGST2   | -1.43547 | -1.91931  | 1.60787  | 1.99529  | 2.12475   | 2.83245   |
| MGST3   | 4.36969  | 4.46714   | 3.34004  | 3.80107  | 3.85539   | 4.5209    |
| MIA     | 5.58653  | 5.50072   | -3.37468 | -5.88892 | -5.11342  | -4.70296  |
| MIA3    | 6.20972  | 6.31382   | 6.48535  | 6.7713   | 6.30046   | 6.32815   |
| MIAT    | 1.15442  | 1.57905   | 2.09603  | 2.1139   | 2.76725   | 2.59489   |
| MIATNB  | 0.536123 | 0.181052  | 0.800231 | 0.865515 | 0.129283  | 0.290247  |
| MIB1    | 5.53063  | 5.84064   | 5.8041   | 6.25639  | 5.86592   | 6.27769   |
| MIB2    | 1.73558  | 1.12967   | 2.31634  | 2.25313  | 1.92333   | 1.74585   |
| MICA    | 3.15552  | 2.98779   | 2.92838  | 3.08534  | 5.41582   | 5.66368   |
| MICAL1  | 3.13189  | 3.05195   | 3.57749  | 3.70443  | 3.72246   | 3.8191    |
| MICAL2  | 2.13699  | 2.72945   | 4.31631  | 5.36334  | 3.6862    | 4.28338   |
| MICAL3  | 7.25364  | 7.0103    | 4.98071  | 4.85407  | 6.248     | 5.64435   |
| MICALL1 | 6.06534  | 5.90731   | 3.66979  | 3.9024   | 4.98355   | 4.65851   |
| MICALL2 | 2.72929  | 2.18822   | 3.19152  | 3.1248   | 2.92466   | 2.21812   |
| MICB    | 3.76259  | 3.48447   | 3.31574  | 3.74642  | 2.81567   | 2.48584   |
| MICU1   | 4.10021  | 4.16011   | 4.23854  | 4.61653  | 4.73038   | 4.95238   |
| MICU2   | 3.67487  | 3.95501   | 3.17843  | 3.58988  | 3.62508   | 4.14971   |
| MICU3   | ?        | ?         | 3.00878  | 2.58118  | 0.909612  | 0.878317  |
| MID1    | 4.20178  | 4.12023   | 4.86631  | 5.25146  | 6.06758   | 6.10905   |



|             |           |           |           |            |            |           |
|-------------|-----------|-----------|-----------|------------|------------|-----------|
| MID1IP1     | 2.7251    | 2.50902   | 3.30466   | 3.5864     | 3.08045    | 3.10386   |
| MIDN        | 3.05079   | 2.44406   | 3.24275   | 3.05356    | 3.60766    | 3.54831   |
| MIEF1       | 5.35587   | 5.31358   | 4.62944   | 5.02944    | 5.1844     | 5.25833   |
| MIEF2       | 1.64081   | 1.37009   | 2.30433   | 2.54224    | 2.4351     | 2.48805   |
| MIEN1       | 2.92088   | 2.86159   | 2.40762   | 2.77935    | 3.42972    | 3.85909   |
| MIER1       | 4.85166   | 4.98268   | 4.98075   | 5.23658    | 5.50301    | 5.55478   |
| MIER2       | 2.62736   | 2.31853   | 2.12028   | 2.22658    | 3.00147    | 2.68561   |
| MIER3       | 4.65783   | 4.81269   | 4.88095   | 5.0621     | 4.95577    | 4.96203   |
| MIF         | 5.12256   | 4.69723   | 4.45798   | 4.82549    | -2.00149   | -3.42671  |
| MIF-AS1     | 0.319445  | 0.342896  | 0.617214  | 0.718675   | -0.272146  | -0.491296 |
| MIF4GD      | 1.59326   | 1.67611   | 1.6133    | 1.48647    | 2.15689    | 2.37069   |
| MIIP        | 1.84398   | 1.58704   | 2.05967   | 2.23992    | 2.13737    | 2.36477   |
| MILR1       | 1.7314    | 1.54281   | 2.35177   | 2.84828    | 1.69287    | 1.76092   |
| MINA        | 4.33331   | 4.50852   | 4.88212   | 5.14725    | 3.93225    | 4.39103   |
| MINK1       | 4.00894   | 3.76234   | 4.54919   | 4.55407    | 4.74481    | 4.65303   |
| MINOS1      | 3.69712   | 3.69252   | 3.7771    | 4.01213    | 4.32188    | 4.79981   |
| MINPP1      | 4.58399   | 4.52867   | 4.06914   | 4.20519    | 4.86423    | 5.06806   |
| MIOS        | 4.31982   | 4.42969   | 3.81506   | 3.93556    | 4.18518    | 4.5752    |
| MIPEP       | 1.97496   | 1.87547   | 2.14741   | 2.35471    | 2.07442    | 2.78515   |
| MIPOL1      | 3.47085   | 3.4928    | 2.73833   | 2.56361    | 2.99075    | 3.22403   |
| MIR133A1HG  | 0.80878   | 0.831845  | 1.82773   | 1.50592    | 0.939663   | 0.270672  |
| MIR17HG     | 3.5055    | 3.70832   | 1.5647    | 1.75539    | 1.5246     | 1.70271   |
| MIR181A1HG  | 3.79277   | 3.67159   | 3.43118   | 3.09819    | 3.54304    | 3.22107   |
| MIR210HG    | -0.159773 | -0.629746 | 1.91453   | 1.73041    | 2.38682    | 1.17598   |
| MIR222HG    | 3.97688   | 3.69323   | 3.43669   | 3.56183    | 3.67731    | 3.16057   |
| MIR22HG     | 2.89898   | 2.89691   | 4.01246   | 4.18694    | 4.29025    | 3.76699   |
| MIR4435-2HG | 4.62939   | 4.5152    | 5.024     | 5.13412    | 5.08695    | 4.85477   |
| MIR4458HG   | -2.30606  | -3.65369  | 2.42382   | 2.69208    | 1.02625    | 0.80115   |
| MIR4697HG   | 2.29246   | 2.42895   | 1.20023   | 0.857026 ? | ?          |           |
| MIR503HG    | -0.341358 | -1.07024  | 0.782333  | 0.591699   | 0.172692   | -0.38461  |
| MIR600HG    | 2.7053    | 2.3336    | 1.84782   | 1.43347    | 3.08861    | 2.28107   |
| MIR646HG    | 1.45071   | 1.43806   | -2.5977   | -3.10759 ? | ?          |           |
| MIR99AHG    | -1.69862  | -1.93875  | -0.428455 | -0.716287  | 4.26376    | 4.88293   |
| MIRLET7BHG  | 3.65846   | 3.45453   | 4.29726   | 4.24542    | 3.86814    | 3.25329   |
| MIRLET7DHG  | 0.568392  | 0.895605  | 0.452543  | 1.26434    | -0.0365333 | 0.752243  |
| MIS12       | 4.18257   | 4.22422   | 4.24916   | 4.41407    | 4.10565    | 4.43979   |
| MIS18A      | 2.44814   | 2.66902   | 2.95603   | 3.21536    | 2.15669    | 1.97279   |
| MIS18BP1    | 4.22349   | 4.38499   | 3.40519   | 3.51323    | 4.57628    | 5.04732   |
| MITD1       | 3.42017   | 3.4546    | 3.17821   | 3.27488    | 3.30908    | 3.09879   |
| MITF        | 3.31773   | 3.29538   | 3.3749    | 3.70334    | 2.52953    | 2.21811   |
| MKI67       | 8.61695   | 8.43816   | 8.73848   | 8.63889    | 8.75554    | 7.99205   |
| MKKS        | 4.19875   | 4.0994    | 4.29826   | 4.58814    | 4.81238    | 5.18201   |
| MKL1        | 3.22425   | 3.03101   | 3.44219   | 3.37095    | 2.80526    | 2.54122   |
| MKL2        | 4.89605   | 4.80409   | 5.34085   | 5.26579    | 4.1843     | 3.9713    |
| MKLN1       | 6.26026   | 6.22574   | 6.8745    | 7.10657    | 6.47669    | 6.37544   |
| MKLN1-AS    | 0.133932  | 0.107125  | 1.04535   | 1.0909     | 0.234612   | 0.541297  |
| MKNK1       | 3.66176   | 3.75025   | 4.04155   | 4.36386    | 4.02096    | 3.94433   |
| MKNK2       | 4.1179    | 3.50149   | 4.45219   | 4.49015    | 5.41047    | 4.90707   |
| MKRN1       | 5.72496   | 5.77516   | 5.25675   | 5.63745    | 6.20991    | 6.34811   |
| MKRN2       | 4.45387   | 4.55179   | 3.87697   | 4.18854    | 4.45536    | 4.91295   |
| MKRN3       | 2.81313   | 2.8401    | 3.23121   | 3.21609    | 2.52466    | 2.18067   |
| MKRN5P      | 0.870156  | 1.00482   | 1.05281   | 1.01017    | 0.715208   | 0.86236   |

|           |           |            |           |           |            |          |
|-----------|-----------|------------|-----------|-----------|------------|----------|
| MKS1      | 2.19271   | 2.06856    | 1.82198   | 2.02562   | 2.15663    | 2.20016  |
| MLEC      | 8.35369   | 8.5712     | 7.57636   | 7.89827   | 7.43358    | 7.67899  |
| MLF1      | 2.91195   | 3.0068     | 2.99888   | 3.44577   | 2.68621    | 3.5245   |
| MLF2      | 5.2843    | 5.21311    | 4.90526   | 5.22321   | 5.61641    | 5.66286  |
| MLH1      | 4.72875   | 4.70017    | 4.10304   | 4.44575   | 4.87252    | 4.91075  |
| MLH3      | -0.632781 | -0.508457  | 4.34785   | 4.31638   | 3.66612    | 3.47568  |
| MLK4      | 2.02886   | 2.13336    | 2.39769   | 2.53143   | 2.42717    | 1.97279  |
| MLK7-AS1  | 0.0977591 | -0.0582957 | 1.34333   | 1.3372    | -0.609971  | -1.08729 |
| MLKL      | 2.14014   | 2.29872    | 2.90129   | 3.34238   | 1.90577    | 2.42773  |
| MLLT1     | 4.02713   | 3.54698    | 4.12708   | 4.20858   | 4.68619    | 4.12775  |
| MLLT10    | 4.44558   | 4.44328    | 3.56802   | 3.6037    | 4.38613    | 4.34585  |
| MLLT11    | 3.82362   | 3.85024    | 5.70675   | 6.06016   | 5.79354    | 5.90925  |
| MLLT3     | 4.15656   | 4.2289     | 2.45311   | 2.55296   | 4.8144     | 4.70479  |
| MLLT4     | 5.3494    | 5.26549    | 5.27743   | 5.34598   | 5.78908    | 5.38868  |
| MLLT6     | 5.09305   | 5.14434    | 4.99849   | 5.04172   | 5.20909    | 5.38262  |
| MLPH      | 2.99267   | 3.37004    | 3.34004   | 4.03583   | 2.93589    | 3.77508  |
| MLST8     | 2.86816   | 2.35929    | 2.99828   | 3.11471   | 2.9891     | 2.94223  |
| MLX       | 4.88183   | 4.64948    | 4.65562   | 4.81208   | 5.71725    | 5.54887  |
| MLXIP     | 4.45447   | 4.19893    | 4.32229   | 4.18694   | 5.06931    | 4.43155  |
| MLYCD     | 2.90847   | 2.72962    | 3.59543   | 3.67235   | 2.11678    | 1.94159  |
| MMAA      | 1.42475   | 1.2583     | 1.06446   | 1.1104    | 0.447209   | 1.24753  |
| MMAB      | 3.51118   | 3.3086     | 2.44208   | 2.81599   | 2.57092    | 3.08046  |
| MMACHC    | 2.95803   | 3.01751    | 4.97178   | 5.26346   | 4.86077    | 4.88496  |
| MMADHC    | 5.86549   | 5.88805    | 4.78394   | 5.31259   | 6.12401    | 7.09121  |
| MMD       | 3.76546   | 4.31933    | 5.66744   | 5.87237   | 2.51712    | 3.20618  |
| MME       | ?         | -4.87366   | 4.11302   | 4.79084   | -3.85089   | -3.70484 |
| MMGT1     | 3.78373   | 3.83406    | 4.5655    | 4.88764   | 5.01652    | 5.2099   |
| MMP1      | -2.52833  | -2.29223   | 4.25527   | 6.45816 ? |            | -3.12051 |
| MMP13     | -5.69162  | -6.45019   | 3.63983   | 4.79579   | -5.65305 ? |          |
| MMP14     | 5.19386   | 4.78921    | 5.60887   | 5.84351   | 4.87056    | 4.58559  |
| MMP15     | 4.32813   | 3.99453    | 1.09265   | 1.23995   | 1.59239    | 1.62424  |
| MMP16     | 7.1303    | 6.92101    | 2.32824   | 2.50221   | 6.00255    | 6.27654  |
| MMP17     | 2.87646   | 2.31525    | 0.138526  | 0.19507   | -1.23372   | -1.70626 |
| MMP19     | -1.13684  | -2.12563   | 1.99441   | 1.99952   | -3.52019   | -2.43702 |
| MMP2      | 8.23223   | 8.5668     | 8.76681   | 8.95299   | 6.5498     | 6.05295  |
| MMP24     | 1.47523   | 1.05428    | 1.12879   | 1.19269   | 1.12858    | 0.788702 |
| MMP24-AS1 | 3.37127   | 3.11672    | 2.6336    | 2.65986   | 4.18324    | 4.18563  |
| MMP3      | -5.10914  | -4.87366   | 3.24484   | 5.27      | -2.572     | -1.12145 |
| MMS19     | 4.70977   | 4.65933    | 4.79303   | 4.99839   | 5.26077    | 5.14112  |
| MMS22L    | 5.02926   | 5.08018    | 5.21147   | 5.21703   | 5.40342    | 5.10546  |
| MNAT1     | 3.93845   | 3.96864    | 3.45673   | 3.52416   | 3.41784    | 3.98666  |
| MND1      | 2.06913   | 2.1738     | 1.30837   | 1.39106   | 1.59239    | 1.85556  |
| MNS1      | 2.61342   | 2.63677    | 1.45185   | 1.68484   | 1.91515    | 1.93443  |
| MNT       | 1.90457   | 1.39517    | 2.39392   | 2.32312   | 2.39155    | 1.76137  |
| MOAP1     | 3.3844    | 3.3637     | 2.13842   | 2.09576   | 3.86031    | 3.7609   |
| MOB1A     | 6.0935    | 6.49242    | 6.22586   | 6.80086   | 6.76658    | 7.3814   |
| MOB1B     | 4.82985   | 4.81618    | 4.58714   | 4.56536   | 5.06035    | 4.46945  |
| MOB2      | 2.95556   | 2.81793    | 1.82213   | 2.46104   | 2.63202    | 2.74862  |
| MOB3A     | 2.0921    | 1.59788    | 3.38444   | 3.39302   | 2.74058    | 2.22994  |
| MOB3C     | 3.37106   | 3.45004    | 3.6604    | 4.10185   | 3.15181    | 3.07793  |
| MOB4      | 4.13904   | 4.37848    | 3.80875   | 4.36189   | 4.7344     | 5.11626  |
| MOCOS     | 3.56654   | 3.53151    | -0.138983 | 0.46112   | 1.44826    | 1.56011  |

|           |          |           |          |          |          |           |
|-----------|----------|-----------|----------|----------|----------|-----------|
| MOCS1     | 3.0269   | 2.91831   | 2.51137  | 3.20101  | 2.13339  | 2.15456   |
| MOCS2     | 3.94658  | 4.04791   | 4.24169  | 4.52779  | 4.40712  | 5.01352   |
| MOCS3     | 4.11389  | 4.19089   | 2.66198  | 2.97333  | 3.1276   | 2.99373   |
| MOGS      | 5.86479  | 5.75843   | 4.96304  | 5.04978  | 5.92324  | 5.91761   |
| MOK       | 5.55239  | 5.63971   | 2.23572  | 2.10065  | 2.0778   | 1.84021   |
| MON1A     | 2.79678  | 2.81793   | 1.32432  | 1.74918  | 2.86325  | 3.19717   |
| MON1B     | 4.09776  | 4.032     | 3.9026   | 4.14737  | 3.98354  | 3.87824   |
| MON2      | 5.81315  | 5.75359   | 5.55329  | 5.72168  | 5.26931  | 5.04983   |
| MORC2     | 3.99416  | 3.74731   | 3.98087  | 4.05028  | 4.15788  | 3.83024   |
| MORC3     | 4.06634  | 4.06698   | 4.59212  | 4.7356   | 4.60406  | 4.90341   |
| MORC4     | 4.60523  | 4.52653   | 3.03807  | 3.41669  | 2.33406  | 2.43285   |
| MORF4L1   | 5.34364  | 5.66045   | 5.48135  | 5.97329  | 5.98511  | 6.60593   |
| MORF4L1P1 | 5.60402  | 5.85068   | 5.5323   | 6.1517   | 6.21325  | 6.9934    |
| MORF4L2   | 7.22554  | 7.3321    | 7.00981  | 7.50861  | 7.79803  | 8.36029   |
| MORN1     | 1.85554  | 1.95503   | 2.72338  | 2.86272  | 1.82353  | 1.46325   |
| MORN2     | 2.14329  | 2.11344   | 1.50301  | 1.57037  | 2.4351   | 3.03813   |
| MORN4     | 0.71885  | 0.318612  | 1.91453  | 2.15798  | 0.901996 | 1.25912   |
| MOSPD1    | 2.48333  | 2.72204   | 3.12709  | 3.55117  | 2.80322  | 3.89876   |
| MOSPD2    | 3.05414  | 2.82025   | 2.93022  | 3.20859  | 3.71255  | 3.79512   |
| MOSPD3    | 0.50068  | 0.407614  | 0.610974 | 0.591699 | 0.723471 | 0.785207  |
| MOV10     | 4.78156  | 4.60117   | 5.67193  | 5.72435  | 5.65157  | 4.9876    |
| MOXD1     | 3.65074  | 3.47967   | -1.93506 | -1.64896 | 5.80752  | 6.59878   |
| MPC1      | 1.72302  | 1.82258   | 2.43854  | 3.02046  | 2.74058  | 3.27914   |
| MPC2      | 3.15132  | 3.27322   | 3.3302   | 3.73641  | 3.71488  | 4.2751    |
| MPDU1     | 4.74786  | 4.8001    | 4.74802  | 5.04563  | 5.38193  | 5.98591   |
| MPDZ      | 5.54587  | 5.55708   | 5.22798  | 5.29896  | 6.43079  | 6.21919   |
| MPG       | 1.98998  | 1.65277   | 3.00469  | 3.22073  | 2.61501  | 3.62131   |
| MPHOSPH10 | 4.67104  | 4.70456   | 3.9573   | 4.2727   | 4.64005  | 4.83341   |
| MPHOSPH6  | 3.11149  | 3.22191   | 3.529    | 3.86127  | 2.85737  | 3.24165   |
| MPHOSPH8  | 4.45213  | 4.37726   | 4.35207  | 4.4046   | 3.9457   | 3.72751   |
| MPHOSPH9  | 6.10799  | 6.07543   | 5.38964  | 5.42499  | 5.41788  | 5.3605    |
| MPI       | 4.57113  | 4.45516   | 4.45137  | 4.71758  | 5.00713  | 4.5725    |
| MPLKIP    | 3.99353  | 3.98836   | 3.95858  | 3.83368  | 3.47668  | 3.34857   |
| MPND      | 0.310864 | -0.101508 | 0.538041 | 0.704969 | 1.25008  | 1.36963   |
| MPP1      | 2.64078  | 2.51158   | 2.73535  | 3.69692  | 2.85933  | 2.92265   |
| MPP2      | 1.91565  | 1.59247   | 2.65884  | 2.18121  | 0.172692 | -0.536593 |
| MPP3      | 1.28396  | 1.14454   | 1.91979  | 2.28351  | 1.56372  | 1.25912   |
| MPP5      | 5.05373  | 5.02849   | 4.676    | 4.87771  | 4.67115  | 4.7143    |
| MPP6      | 4.6335   | 4.59379   | 5.19097  | 4.92391  | 4.68342  | 5.14347   |
| MPPE1     | 1.64513  | 1.63199   | 2.04654  | 2.22222  | 2.52728  | 2.86586   |
| MPRIP     | 6.5145   | 6.722     | 6.88338  | 6.83495  | 6.44831  | 5.85107   |
| MPRIPP1   | 2.57485  | 2.79617   | 3.17215  | 3.04854  | 2.59924  | 1.91037   |
| MPST      | 3.10344  | 2.75633   | 3.51865  | 3.71135  | 2.65937  | 2.30453   |
| MPV17     | 4.27963  | 4.04791   | 3.44402  | 3.62588  | 4.93587  | 5.05067   |
| MPV17L2   | 2.19576  | 1.95924   | 1.74725  | 2.16731  | 2.26748  | 2.43431   |
| MPZ       | 6.54842  | 5.52762   | 0.782333 | 0.100749 | -2.65941 | -2.8983   |
| MPZL1     | 6.03982  | 6.043     | 6.5744   | 6.94187  | 5.95507  | 6.10625   |
| MR1       | 1.74803  | 1.51447   | 4.51777  | 4.60541  | 2.67732  | 3.29891   |
| MRAS      | 2.7418   | 3.19179   | 2.40895  | 2.7209   | -3.07415 | -3.12051  |
| MRC2      | 5.55948  | 5.17938   | 7.09458  | 6.84802  | 5.89006  | 5.21251   |
| MRE11A    | 3.65104  | 3.77745   | 4.8556   | 4.95321  | 3.68827  | 3.96336   |
| MREG      | 2.12858  | 2.61461   | 1.19244  | 1.15801  | 2.55282  | 2.40668   |

|          |           |           |          |         |          |          |
|----------|-----------|-----------|----------|---------|----------|----------|
| MRFAP1   | 6.37966   | 6.35479   | 6.02406  | 6.35722 | 7.10247  | 7.24668  |
| MRFAP1L1 | 4.74593   | 4.80041   | 4.52556  | 4.79278 | 5.26152  | 5.39981  |
| MRGBP    | 4.3072    | 4.3716    | 3.73665  | 4.21197 | 4.70381  | 4.59134  |
| MR11     | 3.49393   | 3.50251   | 2.70135  | 3.11534 | 4.2695   | 4.15944  |
| MRM1     | 1.52496   | 1.554     | 0.935482 | 1.16735 | 1.10792  | 1.12623  |
| MROH1    | 2.23758   | 1.82258   | 2.86361  | 2.8827  | 2.42185  | 2.08772  |
| MRPL1    | 2.78273   | 2.95078   | 2.44949  | 2.81302 | 2.7363   | 3.64864  |
| MRPL10   | 4.18357   | 4.19893   | 3.62383  | 3.95456 | 4.09122  | 4.18202  |
| MRPL11   | 4.25293   | 4.15185   | 3.77067  | 4.17077 | 3.50454  | 4.02291  |
| MRPL12   | 3.48912   | 3.41147   | 2.84509  | 3.23177 | 4.24128  | 4.97806  |
| MRPL13   | 3.99615   | 4.0879    | 3.94704  | 4.32788 | 4.39158  | 5.63535  |
| MRPL14   | 3.56067   | 3.53434   | 3.45129  | 3.99445 | 4.45408  | 5.0212   |
| MRPL15   | 3.85358   | 3.75511   | 3.34591  | 3.86128 | 3.28952  | 4.30312  |
| MRPL16   | 3.85454   | 3.86246   | 3.5962   | 3.74448 | 3.69834  | 3.7383   |
| MRPL17   | 4.99004   | 5.01339   | 4.10534  | 4.72168 | 4.87788  | 5.70532  |
| MRPL18   | 3.78976   | 3.81095   | 3.61252  | 4.1067  | 5.04401  | 5.50396  |
| MRPL19   | 5.11152   | 5.16605   | 4.40425  | 4.70013 | 5.25062  | 5.63099  |
| MRPL2    | 2.41537   | 2.43579   | 2.40895  | 2.7398  | 3.3448   | 3.31793  |
| MRPL20   | 4.56859   | 4.56538   | 3.89186  | 4.3025  | 5.3849   | 5.94852  |
| MRPL21   | 4.07158   | 4.15278   | 3.47821  | 3.97863 | 3.92088  | 4.93623  |
| MRPL22   | 2.72299   | 2.77795   | 3.53758  | 3.73509 | 3.45993  | 3.86693  |
| MRPL23   | 3.83718   | 3.75511   | 2.84162  | 3.35879 | 2.77433  | 3.31843  |
| MRPL24   | 4.59267   | 4.48916   | 3.61089  | 3.97465 | 4.37792  | 5.12143  |
| MRPL27   | 4.58343   | 4.51156   | 3.75899  | 3.75381 | 4.81441  | 5.10384  |
| MRPL28   | 2.68895   | 2.58156   | 4.34883  | 4.78826 | 4.20618  | 4.72791  |
| MRPL3    | 5.12727   | 5.23399   | 4.43285  | 4.95091 | 5.48151  | 6.29615  |
| MRPL30   | 4.87689   | 4.92561   | 4.04316  | 4.33621 | 4.87974  | 5.563    |
| MRPL32   | 4.74332   | 4.8636    | 5.18007  | 5.42204 | 4.72068  | 5.28124  |
| MRPL33   | 4.59607   | 4.44442   | 3.16078  | 3.48008 | 6.16961  | 6.7357   |
| MRPL34   | 2.66753   | 2.55623   | 1.64983  | 2.32719 | 3.62916  | 4.2928   |
| MRPL35   | 5.02478   | 5.07301   | 4.22754  | 4.51474 | 5.12544  | 5.42877  |
| MRPL36   | 3.95465   | 4.02699   | 3.42751  | 3.95726 | 4.86471  | 5.17515  |
| MRPL37   | 5.12199   | 5.13892   | 5.20448  | 5.66936 | 5.53084  | 5.78362  |
| MRPL37P1 | -0.676496 | -0.508457 | 0.793829 | 1.07114 | 0.990802 | 0.151378 |
| MRPL38   | 4.02692   | 4.03043   | 3.73016  | 4.11694 | 4.41466  | 4.57779  |
| MRPL39   | 3.22126   | 3.12212   | 3.16742  | 3.82042 | 2.93775  | 3.60391  |
| MRPL3P1  | 1.84568   | 2.07353   | 0.978166 | 1.95946 | 2.22175  | 2.81233  |
| MRPL4    | 3.09467   | 2.72885   | 2.42451  | 2.78296 | 3.74469  | 3.99661  |
| MRPL40   | 4.23238   | 4.09461   | 3.72488  | 4.09451 | 3.67172  | 4.22844  |
| MRPL41   | 2.40946   | 2.33483   | 2.25112  | 2.65273 | 3.32268  | 4.07792  |
| MRPL42   | 5.63894   | 5.5992    | 4.52377  | 4.85968 | 5.61655  | 5.83489  |
| MRPL43   | 3.69944   | 3.69592   | 3.4348   | 3.87498 | 4.6377   | 5.2268   |
| MRPL44   | 3.27331   | 3.3347    | 3.16078  | 3.43033 | 4.00478  | 4.26482  |
| MRPL45   | 3.9297    | 3.8521    | 3.47733  | 3.95049 | 4.02269  | 4.43222  |
| MRPL46   | 3.70074   | 3.69219   | 3.42378  | 3.75845 | 3.33687  | 3.94592  |
| MRPL47   | 3.53152   | 3.73251   | 3.64881  | 4.03444 | 4.42977  | 5.43723  |
| MRPL48   | 3.55713   | 3.64044   | 2.46035  | 2.73039 | 2.81543  | 3.20318  |
| MRPL49   | 5.41713   | 5.45062   | 4.3592   | 4.82263 | 4.56003  | 4.97188  |
| MRPL50   | 3.75213   | 3.76231   | 3.15846  | 3.50588 | 3.76172  | 4.52448  |
| MRPL51   | 5.55724   | 5.54673   | 5.04838  | 5.46596 | 5.43683  | 6.04778  |
| MRPL52   | 3.09209   | 3.10701   | 2.64938  | 2.93284 | 3.69504  | 4.36876  |
| MRPL53   | 3.33674   | 3.19715   | 2.67757  | 2.85984 | 3.22841  | 3.61252  |

|               |           |          |          |           |          |          |
|---------------|-----------|----------|----------|-----------|----------|----------|
| MRPL54        | 2.47336   | 2.29872  | 1.25116  | 1.53507   | 3.35232  | 4.4868   |
| MRPL55        | 2.71667   | 2.47674  | 2.62706  | 3.1224    | 3.21621  | 3.35668  |
| MRPL57        | 3.64188   | 3.68943  | 3.36145  | 3.72089   | 3.78159  | 4.32533  |
| MRPL9         | 4.34524   | 4.40528  | 3.50201  | 3.88433   | 3.9041   | 4.28154  |
| MRPS10        | 3.87468   | 3.79004  | 3.98302  | 4.48187   | 5.15287  | 5.51448  |
| MRPS11        | 3.88527   | 3.76896  | 4.12691  | 4.34371   | 3.9733   | 4.327    |
| MRPS12        | 3.20532   | 3.03791  | 2.80135  | 3.1908    | 3.84064  | 4.32647  |
| MRPS14        | 3.81957   | 3.6561   | 3.60772  | 3.82494   | 3.632    | 4.00237  |
| MRPS15        | 4.65625   | 4.62923  | 4.27898  | 4.5968    | 5.005    | 5.36609  |
| MRPS16        | 5.24963   | 5.2845   | 4.83469  | 5.24154   | 6.03577  | 6.42541  |
| MRPS17        | 3.56589   | 3.50005  | 3.13446  | 3.51874   | 3.73447  | 4.17967  |
| MRPS18A       | 3.86239   | 3.72458  | 3.26821  | 3.63649   | 4.15323  | 4.31462  |
| MRPS18B       | 4.4652    | 4.43727  | 4.3302   | 4.7784    | 4.90145  | 4.82953  |
| MRPS18C       | 3.3838    | 3.55515  | 3.09829  | 3.50599   | 3.62873  | 4.44657  |
| MRPS2         | 3.59494   | 3.47914  | 3.25509  | 3.66639   | 4.04856  | 4.05719  |
| MRPS21        | 5.33539   | 5.1998   | 4.18061  | 4.40192   | 5.44202  | 5.93983  |
| MRPS22        | 4.11145   | 4.20857  | 3.91831  | 4.36773   | 4.1677   | 4.75575  |
| MRPS23        | 5.19383   | 5.29203  | 4.18934  | 4.63348   | 5.90979  | 6.73285  |
| MRPS24        | 4.49721   | 4.21811  | 4.04418  | 4.54896   | 4.29652  | 4.48434  |
| MRPS25        | 5.09769   | 5.01382  | 4.53236  | 4.55404   | 5.08302  | 4.72969  |
| MRPS26        | 3.94567   | 3.96236  | 3.25111  | 3.77229   | 3.63775  | 4.14659  |
| MRPS27        | 5.13379   | 5.21178  | 5.50163  | 5.8465    | 5.83713  | 6.05004  |
| MRPS28        | 2.70201   | 2.69686  | 2.77195  | 3.0686    | 3.75251  | 4.45753  |
| MRPS30        | 4.39103   | 4.60727  | 4.29322  | 4.56713   | 5.13328  | 5.13091  |
| MRPS31        | 2.88589   | 2.77795  | 2.83608  | 2.95996   | 2.8073   | 2.87072  |
| MRPS31P4      | 0.0961134 | 0.604185 | 0.453122 | 0.339263  | 0.219128 | 0.883629 |
| MRPS31P5      | 1.64438   | 1.74978  | 1.61365  | 1.64532   | 1.13809  | 0.534928 |
| MRPS33        | 3.22425   | 3.10511  | 3.12482  | 3.57416   | 4.23449  | 5.04315  |
| MRPS34        | 4.27821   | 4.08116  | 4.03563  | 4.35571   | 4.46572  | 4.70903  |
| MRPS35        | 4.58342   | 4.75268  | 4.13503  | 4.63349   | 4.05134  | 4.7751   |
| MRPS36        | 1.9588    | 2.20503  | 2.31739  | 2.81599   | 2.96643  | 3.91209  |
| MRPS36P1      | 0.769399  | 0.729896 | 0.963592 | 1.4148    | 1.70797  | 2.55902  |
| MRPS5         | 4.81068   | 4.79218  | 4.4818   | 4.77228   | 5.29243  | 5.11506  |
| MRPS6         | 6.08993   | 6.2117   | 6.63893  | 6.78334   | 5.33445  | 5.24618  |
| MRPS7         | 4.1915    | 4.15562  | 4.60323  | 5.03556   | 5.57203  | 6.15857  |
| MRPS9         | 3.7295    | 3.83068  | 3.21057  | 3.64931   | 3.67584  | 3.92707  |
| MRRF          | 3.98575   | 3.93412  | 4.04669  | 4.13127   | 4.52811  | 4.73715  |
| MRS2          | 4.27246   | 4.00405  | 3.59291  | 3.73269   | 4.93399  | 5.05567  |
| MRTO4         | 4.99082   | 5.07184  | 4.44544  | 4.96438   | 5.46759  | 5.59248  |
| MSANTD2       | 3.48333   | 3.55368  | 3.80638  | 3.7988    | 3.12923  | 2.66834  |
| MSANTD3       | 4.69589   | 4.85117  | 4.08326  | 4.44072   | 4.95392  | 4.66287  |
| MSANTD3-TMEFF | 1.2257    | 1.21359  | 1.54476  | 1.17236   | 1.70682  | 0.968201 |
| MSANTD4       | 2.74594   | 2.68945  | 3.63506  | 3.841     | 4.80983  | 4.85361  |
| MSC           | -3.40093  | -4.87366 | 3.90916  | 4.44288 ? |          | ?        |
| MSC-AS1       | -3.42216  | -2.64014 | 3.52261  | 3.80149 ? |          | ?        |
| MSH2          | 5.52823   | 5.61361  | 4.91779  | 5.03135   | 5.19572  | 5.53167  |
| MSH3          | 3.73948   | 3.68886  | 4.04411  | 4.10242   | 4.26398  | 4.60722  |
| MSH5          | 3.31703   | 2.96485  | 3.47368  | 3.40474   | 2.68884  | 1.68701  |
| MSH5-SAPCD1   | 1.82299   | 1.38724  | 2.03872  | 1.66184   | 0.829005 | 0.894426 |
| MSH6          | 6.70251   | 6.76393  | 6.42221  | 6.69026   | 6.42338  | 6.369    |
| MSI2          | 5.81019   | 5.80831  | 4.69299  | 4.67989   | 7.24571  | 6.93329  |
| MSL1          | 5.02158   | 4.90402  | 5.60111  | 5.60411   | 5.87641  | 5.61689  |

|          |           |            |           |           |           |           |
|----------|-----------|------------|-----------|-----------|-----------|-----------|
| MSL2     | 3.94566   | 3.85907    | 3.98389   | 4.03328   | 3.77952   | 3.57174   |
| MSL3     | 3.06213   | 3.17378    | 3.1111    | 3.32573   | 3.361     | 3.53568   |
| MSL3P1   | -2.1653   | -2.46208   | -2.77279  | -2.29725  | 1.43853   | 1.66391   |
| MSMO1    | 5.44936   | 5.45077    | 5.82457   | 6.28695   | 5.38478   | 6.12777   |
| MSN      | 7.23635   | 7.45812    | 8.26055   | 8.70142   | 8.45484   | 8.34054   |
| MSNP1    | 2.84402   | 3.2083     | 4.07899   | 4.47843   | 4.20087   | 3.75536   |
| MSRA     | 1.62738   | 1.92088    | 1.7294    | 2.03075   | 3.14705   | 3.42771   |
| MSRB1    | 1.78476   | 1.58704    | 2.00633   | 2.52781   | 2.2997    | 3.07136   |
| MSRB2    | -0.489437 | -0.818747  | 1.31637   | 1.6394    | 0.405873  | 1.03481   |
| MSRB3    | 4.40812   | 4.95555    | 1.85542   | 2.96532   | 3.34672   | 4.00753   |
| MSS51    | 0.0954519 | -0.0197685 | -0.935332 | -1.30113  | 1.09463   | -0.121607 |
| MST1     | 2.43076   | 1.88282    | 1.71509   | 1.53316   | 1.22414   | 0.848598  |
| MSTO1    | 3.92834   | 3.76157    | 3.49374   | 3.92149   | 3.59294   | 3.40548   |
| MSTO2P   | 0.732087  | 0.37109    | 0.155555  | 0.569958  | 0.855982  | -0.942889 |
| MSX1     | 0.388476  | 0.166625   | 2.45311   | 2.97864   | 0.0946955 | 0.176042  |
| MSX2     | -1.37679  | -1.65505   | 1.05494   | 1.82784   | -1.48999  | -1.61882  |
| MT1E     | 0.776727  | 1.64571    | 0.225978  | 1.8512    | 5.2023    | 6.70998   |
| MT1F     | ?         | ?          | -1.79072  | -0.40821  | 0.939663  | 2.24754   |
| MT1P3    | -3.8896   | -3.13966   | -3.59683  | -2.10822  | 0.479334  | 2.42894   |
| MT1X     | 1.58589   | 1.99758    | 1.55707   | 2.82102   | 3.7981    | 4.951     |
| MT2A     | 5.21342   | 5.28728    | 3.53245   | 4.16997   | 5.68481   | 6.29713   |
| MT2P1    | 0.323774  | 0.903409   | -1.37621  | -0.398186 | 0.798349  | 1.58757   |
| MTA1     | 4.44296   | 4.13509    | 3.21175   | 3.22749   | 3.93557   | 3.43427   |
| MTA2     | 6.01369   | 6.21885    | 5.30984   | 5.84971   | 6.09475   | 6.42802   |
| MTA3     | 3.81957   | 3.61664    | 3.73086   | 3.59161   | 3.79399   | 3.60163   |
| MTAP     | 5.78865   | 5.90692    | 4.64206   | 4.98587   | 6.67094   | 6.73962   |
| MTAPP2   | 0.273349  | 0.759233   | 1.07934   | 0.868521  | 1.18934   | 1.25359   |
| MTATP6P1 | 5.37605   | 4.99862    | 5.97286   | 5.40143   | 5.87617   | 5.10224   |
| MTBP     | 3.90491   | 4.01039    | 3.64936   | 3.79242   | 3.58209   | 3.79742   |
| MTCH1    | 5.24635   | 5.12633    | 5.71092   | 6.18751   | 6.34304   | 6.39      |
| MTCH2    | 4.68516   | 4.66449    | 4.60355   | 5.04408   | 5.57239   | 5.8862    |
| MTCL1    | 2.64468   | 2.6352     | 4.1214    | 4.18119   | 5.69593   | 5.21442   |
| MTCP1    | 1.18098   | 1.18599    | 1.49963   | 1.88745   | 1.60214   | 1.88691   |
| MTDH     | 6.91796   | 7.08991    | 7.08266   | 7.53976   | 7.17902   | 7.41497   |
| MTERF1   | 4.40617   | 4.42893    | 4.28815   | 4.40094   | 3.89523   | 4.19112   |
| MTERF2   | 3.29632   | 3.14213    | 3.11566   | 3.13492   | 2.81167   | 2.64118   |
| MTERF3   | 2.91011   | 2.93162    | 2.78803   | 3.10063   | 3.00148   | 3.52691   |
| MTERF4   | 3.82607   | 3.94535    | 3.90088   | 3.96045   | 4.54063   | 4.25219   |
| MTF1     | 4.18813   | 4.43853    | 3.44541   | 3.89117   | 4.77561   | 5.04315   |
| MTF2     | 4.93391   | 4.70644    | 5.30631   | 5.14027   | 4.9672    | 4.43666   |
| MTFMT    | 2.35887   | 2.24107    | 2.46754   | 2.64941   | 2.35093   | 2.5317    |
| MTFP1    | 3.60712   | 3.40166    | 2.88092   | 2.75115   | 3.45762   | 3.42334   |
| MTFR1    | 4.19341   | 4.30308    | 3.9523    | 4.2412    | 3.50857   | 3.91171   |
| MTFR1L   | 4.75116   | 4.63103    | 4.1325    | 4.36845   | 5.34685   | 5.46479   |
| MTFR2    | 1.58636   | 1.59788    | 1.12941   | 1.41477   | 2.18206   | 2.47818   |
| MTG1     | 3.58957   | 3.31702    | 3.4359    | 3.53382   | 3.81037   | 3.6223    |
| MTG2     | 4.40945   | 4.32669    | 3.84853   | 4.10913   | 4.85487   | 4.63758   |
| MTHFD1   | 6.00283   | 6.059      | 4.72056   | 5.1821    | 5.60159   | 5.87117   |
| MTHFD1L  | 4.94385   | 5.0149     | 3.1111    | 3.3048    | 4.90049   | 4.56823   |
| MTHFD1P1 | 2.66974   | 2.91694    | 1.57731   | 1.92657   | 2.47313   | 2.39229   |
| MTHFD2   | 5.22652   | 5.93101    | 4.67227   | 5.66888   | 5.68099   | 6.38516   |
| MTHFD2L  | 3.47696   | 3.63247    | 2.84654   | 3.19258   | 5.01362   | 5.18553   |

|           |          |          |            |           |            |            |
|-----------|----------|----------|------------|-----------|------------|------------|
| MTHFD2P7  | 0.323393 | 1.30865  | -0.0973012 | 1.21373   | 0.817083   | 1.64815    |
| MTHFR     | 2.87901  | 2.6075   | 3.48326    | 3.54244   | 3.43435    | 3.02829    |
| MTHFS     | 1.47451  | 1.57637  | 1.64185    | 2.04645   | 0.630722   | 1.33407    |
| MTHFSD    | 3.05247  | 3.05483  | 3.23854    | 3.30903   | 2.17891    | 2.03478    |
| MTIF2     | 4.64212  | 4.58942  | 4.18817    | 4.42045   | 4.85365    | 5.17791    |
| MTIF3     | 2.32425  | 2.43554  | 2.48915    | 2.81288   | 3.19622    | 3.85416    |
| MTM1      | 2.47586  | 2.55676  | 2.47827    | 2.61229   | 3.17417    | 3.28197    |
| MTMR1     | 4.19194  | 4.50293  | 3.8235     | 4.21872   | 5.03752    | 5.11505    |
| MTMR10    | 3.86758  | 3.85527  | 3.27458    | 3.39311   | 3.34305    | 3.46582    |
| MTMR11    | 1.99443  | 2.15188  | 2.89062    | 3.12958   | 2.83555    | 3.22107    |
| MTMR12    | 4.60925  | 4.35811  | 4.34786    | 4.44288   | 5.32589    | 5.02883    |
| MTMR14    | 3.91747  | 3.8936   | 3.31832    | 3.41277   | 4.49956    | 4.60503    |
| MTMR2     | 4.46582  | 4.62858  | 5.14008    | 5.5864    | 5.71824    | 6.12973    |
| MTMR3     | 4.64468  | 4.64599  | 4.95562    | 5.02858   | 5.00322    | 4.74968    |
| MTMR4     | 5.46392  | 5.83381  | 5.02591    | 5.68395   | 5.65312    | 6.3952     |
| MTMR6     | 4.65956  | 4.90238  | 4.42934    | 4.96731   | 4.35161    | 4.89598    |
| MTMR7     | 1.30193  | 1.11343  | 1.92932    | 1.90786   | 1.12764    | 0.607787   |
| MTMR9     | 4.14284  | 4.40502  | 4.02304    | 4.37905   | 4.27653    | 4.63935    |
| MTMR9LP   | -2.05464 | -1.60444 | 0.747284   | 1.18585   | 0.578176   | -0.0341529 |
| MTND1P23  | 2.95018  | 2.76598  | 3.1088     | 2.65273   | 3.56489    | 2.68561    |
| MTND2P28  | 5.75444  | 5.56229  | 5.74462    | 5.15032   | 6.19143    | 6.09821    |
| MTND4P12  | -1.05494 | -0.93902 | -1.229     | -0.649181 | 2.89044    | 2.2933     |
| MTO1      | 4.22635  | 4.16817  | 3.36131    | 3.77357   | 3.90949    | 3.92428    |
| MTOR      | 6.27448  | 6.27686  | 6.05254    | 6.45315   | 6.58731    | 6.53542    |
| MTPAP     | 3.9883   | 4.06755  | 3.43303    | 3.62926   | 3.83053    | 3.89505    |
| MTPN      | 7.41022  | 7.53727  | 6.67834    | 7.14116   | 7.49973    | 7.81008    |
| MTR       | 6.13437  | 6.13191  | 5.96017    | 6.08314   | 6.00924    | 5.62476    |
| MTRF1     | 2.2493   | 2.26509  | 2.16964    | 2.27057   | 2.31412    | 2.83245    |
| MTRF1L    | 4.00148  | 4.05019  | 3.74196    | 3.93496   | 4.60367    | 4.54225    |
| MTRNR2L12 | 1.02146  | 0.866963 | 2.71132    | 0.901216  | 0.878914   | 0.633217   |
| MTRR      | 4.91608  | 4.84435  | 4.38538    | 4.81152   | 4.69833    | 4.7414     |
| MTSS1     | 1.00142  | 0.980157 | 1.37111    | 1.17662   | 0.97892    | 0.422664   |
| MTSS1L    | 3.5349   | 2.92848  | 5.18777    | 5.09461   | 5.65503    | 5.1926     |
| MTTP      | -5.10914 | -4.13839 | -2.18288   | -3.10759  | 1.90577    | 2.16982    |
| MTURN     | 3.75421  | 3.7739   | 2.56803    | 2.87702   | 3.08915    | 3.40601    |
| MTUS1     | 2.98532  | 3.30885  | 4.47928    | 4.92097   | 0.91718    | 0.151378   |
| MTX1      | 4.39828  | 4.23054  | 3.69599    | 4.12241   | 3.5398     | 3.52428    |
| MTX2      | 3.5213   | 3.53151  | 3.3653     | 3.6953    | 3.98625    | 4.5003     |
| MTX3      | 4.67976  | 4.81153  | 5.0815     | 5.35059   | 5.398      | 5.46883    |
| MUC5B     | 1.76445  | 1.69706  | -3.18222   | -3.52222  | -4.65668   | -5.69922   |
| MUL1      | 4.18966  | 4.16011  | 4.39484    | 4.80705   | 4.55157    | 4.81586    |
| MUM1      | 4.26064  | 4.03779  | 4.14053    | 4.15185   | 4.63805    | 4.42971    |
| MUS81     | 4.02018  | 4.09201  | 3.58798    | 3.84391   | 3.34391    | 3.39395    |
| MUT       | 3.46331  | 3.60862  | 3.89862    | 4.10427   | 5.32481    | 5.53109    |
| MUTYH     | 2.49479  | 2.54022  | 2.95232    | 3.09235   | 2.55611    | 2.79995    |
| MVB12A    | 2.68419  | 2.72245  | 2.05959    | 2.27402   | 3.26436    | 3.96217    |
| MVB12B    | 2.85167  | 2.64045  | 0.711372   | 0.383121  | -0.0308197 | -0.848487  |
| MVD       | 2.87078  | 2.66645  | 3.04048    | 3.27704   | 1.95074    | 2.57407    |
| MVK       | 3.68066  | 3.58976  | 2.69311    | 3.12      | 2.95624    | 3.44614    |
| MVP       | 2.57937  | 2.66642  | 5.63984    | 6.34521   | 5.15707    | 5.97891    |
| MX1       | -1.65424 | -1.76193 | 3.33312    | 3.26152   | 5.46566    | 4.75787    |
| MX2       | -3.8896  | -3.46127 | 3.31433    | 3.87843   | -0.136604  | 0.100762   |

|            |            |          |            |            |            |           |
|------------|------------|----------|------------|------------|------------|-----------|
| MXD1       | 1.94482    | 2.09942  | 1.6494     | 2.05364    | 2.3227     | 2.44966   |
| MXD3       | 2.6837     | 2.41008  | 3.09365    | 3.23299    | 2.73508    | 3.06409   |
| MXD4       | 2.6206     | 2.05287  | 3.13389    | 2.96532    | 3.24658    | 3.028     |
| MXI1       | 3.72718    | 3.82023  | 2.84439    | 3.04092    | 3.72446    | 3.24165   |
| MXRA7      | 6.26122    | 6.32965  | 5.78499    | 6.00665    | 6.84944    | 7.07595   |
| MYADM      | 3.18356    | 2.99043  | 3.78946    | 3.96933    | 2.98355    | 2.81686   |
| MYBBP1A    | 4.96705    | 4.75603  | 4.27027    | 4.45958    | 5.72032    | 5.67601   |
| MYBL1      | 3.96181    | 4.19982  | 4.29524    | 4.76691    | 4.2269     | 4.0178    |
| MYBL2      | 6.18996    | 6.02925  | 4.41359    | 4.38802    | 5.09915    | 4.80307   |
| MYC        | 4.2033     | 4.34934  | 3.94317    | 4.30691    | 3.18674    | 2.919     |
| MYCBP      | 4.09207    | 4.1009   | 3.26021    | 3.64269    | 4.62727    | 5.20695   |
| MYCBP2     | 6.29826    | 6.34656  | 6.52556    | 6.60611    | 6.4821     | 6.29067   |
| MYCBP2-AS1 | -0.0550816 | 0.249555 | 0.544782   | 0.261603   | -0.122562  | -0.235222 |
| MYCN       | 3.65847    | 2.76116  | -1.65952   | -0.751045  | -6.64581   | -5.69922  |
| MYD88      | 2.76241    | 2.36371  | 2.95603    | 2.97067    | 3.8245     | 3.61295   |
| MYDGF      | 5.25329    | 5.14263  | 4.49682    | 5.01594    | 5.42385    | 5.8085    |
| MYEF2      | 3.40155    | 3.27694  | -0.095919  | 0.300651   | 5.28318    | 4.49418   |
| MYEOV      | 5.49784    | 5.64011  | -0.0336419 | 1.07114    | 0.0946955  | 0.878317  |
| MYEOV2     | 3.74283    | 3.67927  | 3.12481    | 3.33825    | 4.40307    | 5.32946   |
| MYH10      | 7.30927    | 7.08928  | 6.52751    | 6.22516    | 2.98895    | 1.9868    |
| MYH11      | 1.43744    | 1.33336  | 1.25673    | 1.24742    | 0.74223    | -1.0508   |
| MYH14      | 2.84975    | 2.41352  | -4.59508   | -6.09892 ? |            | -5.69922  |
| MYH15      | 0.430296   | 1.045    | 2.56468    | 4.01141    | -1.95932   | -0.799586 |
| MYH9       | 8.77433    | 8.82983  | 8.41869    | 8.56098    | 9.19219    | 8.66162   |
| MYL12A     | 4.67342    | 4.90065  | 5.3852     | 5.98856    | 6.53523    | 7.16067   |
| MYL12B     | 5.49499    | 4.78569  | 5.78736    | 5.66531    | 7.26356    | 6.9387    |
| MYL5       | 0.165597   | 0.224658 | 1.38681    | 1.40443    | 0.26438    | 0.601078  |
| MYL6       | 7.20924    | 7.57419  | 6.77747    | 7.52276    | 7.90703    | 8.90772   |
| MYL6B      | 4.35192    | 4.30863  | 4.29258    | 4.42498    | 4.82069    | 5.00142   |
| MYL6P3     | 0.658554   | 1.40138  | 0.225978   | 1.12005    | 1.68845    | 1.93056   |
| MYL6P5     | -0.0477872 | 0.51788  | -0.648329  | 0.357946   | 0.898874   | 1.51759   |
| MYLIP      | 2.70394    | 2.69451  | 3.6853     | 3.73979    | 3.09458    | 3.27628   |
| MYLK       | 2.99847    | 3.05286  | 6.0664     | 6.83637    | 5.40682    | 6.87596   |
| MYNN       | 3.46861    | 3.48169  | 3.55528    | 3.77279    | 3.77827    | 4.27264   |
| MYO10      | 5.37304    | 5.17196  | 6.62941    | 6.55405    | 6.1302     | 5.45377   |
| MYO18A     | 5.42796    | 5.20335  | 6.55489    | 6.59325    | 6.35883    | 5.84029   |
| MYO19      | 5.93613    | 5.89973  | 5.15117    | 5.416      | 6.14514    | 5.91303   |
| MYO1B      | 6.14482    | 5.96683  | -1.37581   | -1.86039   | 5.84675    | 5.78012   |
| MYO1C      | 5.94138    | 5.92813  | 5.65882    | 6.02012    | 6.61076    | 6.71143   |
| MYO1D      | 3.63184    | 3.73794  | -3.59683   | -2.93781   | -4.07293   | -2.24661  |
| MYO1E      | 6.00438    | 6.17306  | 3.70825    | 3.96263    | 6.13184    | 5.95817   |
| MYO5A      | 6.42099    | 6.57763  | 4.73384    | 5.04345    | 5.50081    | 5.70001   |
| MYO5B      | 0.96598    | 1.31856  | 1.43687    | 1.41272    | 1.41031    | 2.01383   |
| MYO6       | 4.37638    | 4.64043  | 4.39107    | 4.39598    | 4.30402    | 4.33904   |
| MYO9A      | 5.41767    | 5.43924  | 5.6304     | 5.56238    | 5.3982     | 5.31903   |
| MYO9B      | 4.96868    | 4.79677  | 5.25986    | 5.28171    | 5.77238    | 5.31564   |
| MYOF       | 6.78581    | 6.6443   | 6.56968    | 7.17755    | 7.97629    | 7.71054   |
| MYPN       | 3.26382    | 3.32832  | -1.48269   | -0.493926  | -4.65668 ? |           |
| MYPOP      | 0.752201   | 0.68698  | 0.558032   | 0.659431   | 0.901996   | 1.20023   |
| MYRF       | 1.04254    | 0.822624 | 2.28149    | 2.27916    | 2.0177     | 2.04251   |
| MYRIP      | 2.1982     | 2.12571  | -0.742746  | -1.78641   | -4.33548   | -4.11926  |
| MYSM1      | 5.7759     | 5.80541  | 5.36623    | 5.24319    | 5.83282    | 5.1805    |



|             |           |            |           |              |           |           |
|-------------|-----------|------------|-----------|--------------|-----------|-----------|
| MZF1        | 3.13144   | 2.89939    | 3.02813   | 2.84083      | 3.70041   | 2.78034   |
| MZF1-AS1    | 1.23465   | 0.715841   | 0.840008  | 1.01597      | 0.47024   | -0.610724 |
| MZT1        | 4.20254   | 4.50653    | 3.4942    | 3.9586       | 4.98579   | 4.86976   |
| MZT2A       | 3.12343   | 2.92604    | 2.09845   | 2.39197      | 2.86345   | 3.22687   |
| MZT2B       | 3.1732    | 2.85982    | 2.59318   | 2.92987      | 3.27883   | 4.27548   |
| Metazoa_SRP | 14.248    | 14.0391    | 13.5042   | 13.9186      | 14.6805   | 15.1661   |
| N4BP1       | 3.92571   | 3.96027    | 4.49507   | 4.57591      | 4.88321   | 5.16904   |
| N4BP2       | 4.52189   | 4.60323    | 3.64462   | 3.74136      | 4.13896   | 4.5257    |
| N4BP2L1     | 0.264344  | -0.0877349 | 1.33218   | 1.38232      | -0.217227 | -0.585715 |
| N4BP2L2     | 5.88525   | 5.96494    | 6.13697   | 6.10251      | 5.68619   | 5.54387   |
| N4BP2L2-IT2 | 3.10182   | 3.04495    | 2.62384   | 2.81599      | 2.76596   | 2.43285   |
| N6AMT1      | 2.67774   | 2.33807    | 3.35949   | 3.10792      | 2.06763   | 2.04819   |
| N6AMT2      | -0.432112 | -0.629746  | 0.544485  | 0.619169     | 0.107996  | 0.422664  |
| NAA10       | 3.80176   | 3.72326    | 3.95984   | 4.28347      | 4.91285   | 5.28975   |
| NAA11       | 4.23313   | 4.31604    | -5.1783   | -3.78492     | -4.07293  | -5.69922  |
| NAA15       | 6.27391   | 6.36803    | 5.79842   | 6.11813      | 6.22591   | 6.54065   |
| NAA16       | 3.90269   | 3.86695    | 3.74722   | 3.72406      | 3.52705   | 3.3101    |
| NAA20       | 4.92068   | 4.89249    | 4.35077   | 4.5467       | 4.55824   | 4.87917   |
| NAA25       | 5.6427    | 5.71175    | 5.31731   | 5.53411      | 5.15786   | 5.24237   |
| NAA30       | 3.95734   | 4.18372    | 3.00631   | 3.40096      | 3.85242   | 3.88387   |
| NAA35       | 3.66287   | 3.6153     | 3.34786   | 3.52598      | 3.71906   | 3.84018   |
| NAA38       | 3.22006   | 3.19235    | 3.45037   | 3.91613      | 3.8515    | 5.22523   |
| NAA40       | 4.928     | 4.85286    | 4.68914   | 4.86916      | 4.11776   | 3.88574   |
| NAA50       | 6.30198   | 6.37635    | 6.21763   | 6.75652      | 6.57536   | 6.79288   |
| NAA60       | 3.13533   | 2.74662    | 3.24065   | 3.046        | 3.35789   | 2.78113   |
| NAAA        | 1.22578   | 0.946604   | 2.82771   | 2.96264      | -0.217212 | -0.247125 |
| NAALAD2     | 0.539412  | 0.537236   | 1.20023   | 1.25754      | 0.625168  | -0.619042 |
| NAB1        | 5.74905   | 5.43855    | 4.12713   | 4.03327      | 4.73259   | 4.40939   |
| NAB2        | 2.5055    | 2.50296    | 2.4312    | 2.83076      | 1.83157   | 2.02123   |
| NABP1       | 4.90761   | 4.98456    | 5.83619   | 6.11262      | 6.13026   | 6.02819   |
| NABP2       | 4.35619   | 4.34208    | 3.48536   | 3.90659      | 4.2428    | 4.5483    |
| NACA        | 6.29251   | 6.25571    | 6.76146   | 7.21601      | 7.11242   | 7.70265   |
| NACA2       | 2.41103   | 2.4622     | 2.75109   | 3.35945      | 3.3806    | 3.78103   |
| NACA3P      | 2.50317   | 2.5547     | 2.81374   | 3.30286      | 4.27565   | 4.69161   |
| NACAD       | 0.784805  | 0.804012   | -0.375995 | -0.000171691 | -1.01618  | -1.06257  |
| NACAP1      | 1.13285   | 1.11818    | 1.81733   | 2.25199      | 2.15778   | 2.39897   |
| NACC1       | 4.70891   | 4.34789    | 4.4413    | 4.66662      | 5.61285   | 5.32876   |
| NACC2       | 4.95823   | 3.76839    | 3.38633   | 2.95726      | 5.03011   | 4.09742   |
| NADK        | 4.06827   | 3.87701    | 4.27077   | 4.5565       | 5.11939   | 5.15592   |
| NADK2       | 2.87268   | 3.06659    | 4.95729   | 5.25145      | 3.72662   | 3.75066   |
| NADSYN1     | 3.69323   | 3.44255    | 4.26562   | 4.44384      | 3.78367   | 3.5293    |
| NAE1        | 4.91655   | 4.91923    | 4.91186   | 5.16962      | 5.22919   | 5.71587   |
| NAF1        | 2.18968   | 2.17017    | 1.84441   | 1.98395      | 1.37865   | 1.493     |
| NAGA        | 4.31214   | 4.24191    | 4.33414   | 4.53772      | 3.83354   | 3.72999   |
| NAGK        | 3.31773   | 3.32832    | 3.80747   | 3.85696      | 3.7427    | 3.70903   |
| NAGLU       | 3.86697   | 3.61398    | 4.12708   | 4.27271      | 3.22996   | 3.63313   |
| NAGPA       | 2.99431   | 2.64232    | 2.68701   | 2.76589      | 2.26884   | 1.90802   |
| NAGS        | -0.768111 | -0.707734  | 0.355738  | 0.563685     | -0.217214 | 0.597145  |
| NAIF1       | 2.70607   | 2.62463    | 1.71737   | 2.02048      | 2.88659   | 2.85554   |
| NAIP        | 3.04992   | 2.90874    | 3.89392   | 3.72255      | 3.36874   | 2.95965   |
| NALCN       | 0.920621  | 1.17021    | -0.350462 | 0.646144     | 0.457836  | 0.613136  |
| NAMPT       | 7.16809   | 6.48221    | 6.90522   | 7.43151      | 5.31198   | 5.34673   |

|          |          |          |           |           |              |           |
|----------|----------|----------|-----------|-----------|--------------|-----------|
| NAMPTP1  | 6.66145  | 5.9711   | 6.25813   | 6.86946   | 4.68225      | 5.00816   |
| NANOS1   | 0.377835 | 0.537236 | 1.42385   | 1.07114   | 2.44823      | 1.97279   |
| NANP     | 4.4918   | 4.55813  | 3.58631   | 3.73194   | 3.79193      | 3.77307   |
| NANS     | 3.35892  | 3.40384  | 3.44219   | 3.98525   | 3.64193      | 3.70981   |
| NAPIL1   | 7.56362  | 7.64956  | 7.31453   | 7.49301   | 7.85472      | 7.96698   |
| NAPIL1P1 | 2.18016  | 2.30046  | 2.02662   | 2.21216   | 2.45727      | 2.47753   |
| NAPIL1P3 | 2.00156  | 2.09051  | 1.7508    | 2.01577   | 2.10197      | 2.15149   |
| NAPIL4   | 6.06546  | 6.05767  | 5.67797   | 5.99643   | 5.22108      | 5.56114   |
| NAPIL4P1 | 1.4483   | 1.75317  | 1.18199   | 1.39115   | 2.26831      | 1.78645   |
| NAPIL4P3 | 1.87109  | 2.05359  | 1.53007   | 1.98457   | 2.1591       | 2.10671   |
| NAPIL5   | -4.11163 | -3.46127 | -1.48269  | -0.938639 | 2.13737      | 2.49297   |
| NAPA     | 4.06361  | 3.92782  | 4.11477   | 4.59283   | 4.85568      | 4.90201   |
| NAPB     | 3.97775  | 3.97802  | 4.32723   | 4.47988   | 3.52331      | 3.32395   |
| NAPEPLD  | 4.28747  | 4.44027  | 3.19802   | 3.36488   | 4.62045      | 4.68881   |
| NAPG     | 3.81958  | 3.93803  | 4.31332   | 4.84318   | 4.95531      | 5.06477   |
| NAPRT    | 0.649238 | 0.281977 | 0.470407  | 0.147789  | -0.350791    | -0.497073 |
| NARF     | 4.4633   | 3.97906  | 3.99514   | 3.72879   | 5.83475      | 5.08036   |
| NARFL    | 2.5594   | 2.40955  | 2.5838    | 2.85888   | 2.7208       | 2.95669   |
| NARS     | 7.18298  | 7.27639  | 5.81998   | 6.36331   | 6.21925      | 6.39755   |
| NARS2    | 4.21659  | 4.28141  | 2.76561   | 2.8857    | 2.75235      | 3.20979   |
| NASP     | 6.59313  | 6.53119  | 7.29439   | 7.38075   | 6.6817       | 6.11416   |
| NAT1     | 0.345419 | 0.357428 | 0.860939  | 1.32585   | 0.282309     | 1.06153   |
| NAT10    | 4.66121  | 4.47525  | 4.56215   | 4.86269   | 5.66272      | 5.32877   |
| NAT14    | 3.03733  | 2.86134  | 2.59127   | 2.97067   | 4.24884      | 4.70901   |
| NAT6     | 1.59587  | 1.57201  | 0.625467  | 1.00157   | 1.15053      | 1.22045   |
| NAT9     | 3.4302   | 3.36846  | 3.86632   | 4.04978   | 4.58997      | 4.60162   |
| NATD1    | 0.701877 | 0.318612 | 1.96116   | 1.87419   | 1.44302      | 0.769095  |
| NAV1     | 5.91377  | 5.68517  | 5.63465   | 5.56492   | 4.07101      | 4.00064   |
| NAV2     | 3.2623   | 3.55209  | 2.56093   | 3.42283   | 4.72733      | 4.52993   |
| NAV3     | 3.94477  | 4.23759  | 4.63025   | 5.6208    | 2.47669      | 2.54122   |
| NBAS     | 5.7688   | 5.85596  | 5.24955   | 5.53772   | 5.30581      | 5.43154   |
| NBEA     | 5.13012  | 5.04824  | 3.76951   | 3.59239   | 4.57113      | 4.56438   |
| NBEAL1   | 6.07713  | 6.03342  | 5.60808   | 5.93877   | 6.89203      | 7.35817   |
| NBEAL2   | 2.79877  | 2.44105  | 2.44948   | 2.1904    | 3.44952      | 3.06147   |
| NBL1     | 3.28241  | 2.92042  | 3.35592   | 3.07003   | -0.000170248 | -0.175494 |
| NBN      | 4.96403  | 5.23588  | 4.60764   | 4.80031   | 5.66696      | 6.44014   |
| NBPF1    | 5.10423  | 5.25254  | 4.95817   | 5.08078   | 5.13981      | 4.4356    |
| NBPF10   | 5.14692  | 5.0418   | 4.65732   | 4.66852   | 4.00102      | 3.19583   |
| NBPF11   | 4.20243  | 4.2805   | 3.55813   | 3.66805   | 3.50429      | 2.82601   |
| NBPF12   | 3.91242  | 4.00822  | 3.59363   | 3.76113   | 3.95276      | 3.14059   |
| NBPF14   | 5.41689  | 5.34605  | 5.377     | 5.48359   | 4.82612      | 4.26843   |
| NBPF15   | 5.03251  | 5.03072  | 4.74502   | 4.77914   | 4.42624      | 4.16835   |
| NBPF19   | 5.66287  | 5.60833  | 5.69248   | 5.60198   | 5.07354      | 4.19568   |
| NBPF20   | 4.95031  | 4.89766  | 4.46548   | 4.60231   | 3.6251       | 2.72987   |
| NBPF25P  | 2.58576  | 2.64545  | 1.78227   | 2.14504   | 2.23856      | 1.33137   |
| NBPF26   | 3.9974   | 3.98851  | 3.4353    | 3.54575   | 3.2153       | 2.54143   |
| NBPF3    | 3.06519  | 3.27435  | 2.71455   | 2.98942   | 1.0274       | 1.27277   |
| NBPF8    | 5.45555  | 5.4902   | 4.83517   | 4.94304   | 5.03183      | 4.49744   |
| NBPF9    | 5.60885  | 5.69801  | 5.15255   | 5.22336   | 5.0193       | 4.64901   |
| NBR1     | 5.64766  | 5.79808  | 5.87041   | 6.26243   | 5.95625      | 6.50001   |
| NCALD    | 3.09859  | 2.79926  | -0.790968 | -1.52346  | 0.395063     | 0.615294  |
| NCAMI    | 4.22208  | 4.65071  | 2.05481   | 1.91892   | 3.38796      | 3.32226   |

|           |          |           |          |            |           |            |
|-----------|----------|-----------|----------|------------|-----------|------------|
| NCAM2     | 4.59955  | 4.47672   | -2.5977  | -2.64851 ? |           | ?          |
| NCAPD2    | 7.29309  | 7.04971   | 6.82157  | 6.9382     | 6.66842   | 6.1038     |
| NCAPD2P1  | 0.60502  | 0.86082   | 0.460889 | 0.738111   | 0.340915  | -0.0616585 |
| NCAPD3    | 5.98337  | 6.0091    | 5.80861  | 6.08971    | 6.0446    | 5.79801    |
| NCAPG     | 5.9721   | 5.95361   | 5.33252  | 5.67064    | 6.04141   | 6.37519    |
| NCAPG2    | 6.1507   | 6.10128   | 6.22745  | 6.38677    | 5.35858   | 5.03052    |
| NCAPH     | 5.20254  | 5.37908   | 4.05009  | 4.47707    | 4.91047   | 4.86219    |
| NCAPH2    | 4.37773  | 4.15462   | 4.3203   | 4.59679    | 3.49324   | 3.74243    |
| NCBP1     | 5.14679  | 5.23715   | 4.81788  | 5.14146    | 5.20154   | 5.3533     |
| NCBP2     | 5.54457  | 5.53595   | 5.22081  | 5.43563    | 6.71658   | 6.74386    |
| NCBP2-AS2 | 2.59555  | 2.44105   | 2.40145  | 2.6191     | 3.8981    | 3.95506    |
| NCDN      | 3.91741  | 3.76972   | 3.0186   | 3.26234    | 4.51398   | 4.7185     |
| NCEH1     | 3.94116  | 4.32913   | 4.48978  | 5.38904    | 5.12024   | 5.68986    |
| NCK1      | 3.43663  | 3.48113   | 4.45491  | 4.61312    | 3.56971   | 3.57638    |
| NCK1-AS1  | -0.58107 | -0.626072 | 1.49575  | 1.55573    | -0.433896 | -0.27296   |
| NCK2      | 4.54919  | 4.58847   | 3.37586  | 3.56711    | -1.38979  | -3.70484   |
| NCKAP1    | 6.77704  | 6.31913   | 6.39723  | 6.29395    | 7.27152   | 7.15241    |
| NCKAP5    | 1.89714  | 1.70711   | 0.723445 | 0.833756   | -4.65668  | -3.12051   |
| NCKAP5L   | 3.87267  | 3.65869   | 3.98824  | 3.92459    | 3.25856   | 3.21931    |
| NCKIPSD   | 3.18204  | 3.06268   | 3.30633  | 3.54402    | 4.63373   | 4.3059     |
| NCL       | 8.76525  | 8.79146   | 7.98339  | 8.32508    | 8.80031   | 8.5086     |
| NCLN      | 4.78171  | 4.58904   | 4.34003  | 4.5187     | 5.25332   | 5.18202    |
| NCLP1     | 1.49572  | 1.61934   | 0.82777  | 1.22245    | 1.41661   | 0.702755   |
| NCOA1     | 4.14953  | 4.14448   | 4.28205  | 4.46102    | 4.86226   | 4.88854    |
| NCOA2     | 4.59896  | 4.55327   | 5.36672  | 5.50542    | 4.53754   | 4.44556    |
| NCOA3     | 6.05476  | 6.30948   | 6.39904  | 6.70088    | 5.57331   | 5.69307    |
| NCOA4     | 5.80353  | 5.91455   | 5.85876  | 6.58244    | 6.39243   | 7.00492    |
| NCOA5     | 4.63798  | 4.56713   | 3.83745  | 3.95726    | 4.07946   | 3.96039    |
| NCOA6     | 5.2123   | 5.1141    | 5.08091  | 5.10183    | 4.48308   | 4.26626    |
| NCOA7     | 5.07613  | 4.62129   | 4.56635  | 4.88482    | 4.96903   | 4.53049    |
| NCOR1     | 6.22163  | 6.20584   | 6.88311  | 6.9333     | 6.95229   | 6.62922    |
| NCOR2     | 4.04154  | 3.70833   | 4.02958  | 3.47989    | 4.72176   | 4.37809    |
| NCR3LG1   | 5.13342  | 4.84377   | 1.71133  | 1.96266    | 3.9979    | 3.27913    |
| NCS1      | 4.60639  | 4.15737   | 4.18498  | 4.29843    | 4.353     | 3.7991     |
| NCSTN     | 5.47424  | 5.46657   | 4.75513  | 4.90798    | 5.39578   | 5.55595    |
| NDC1      | 6.5902   | 6.80011   | 5.75789  | 6.28696    | 6.22078   | 6.71718    |
| NDC80     | 3.81366  | 3.91978   | 3.94704  | 4.30796    | 4.63315   | 5.28692    |
| NDE1      | 4.29462  | 4.15988   | 3.90888  | 4.18712    | 3.94334   | 3.73995    |
| NDEL1     | 4.13064  | 3.7356    | 4.38157  | 4.33722    | 4.41449   | 3.73829    |
| NDFIP1    | 4.80869  | 5.05233   | 4.91715  | 5.25641    | 5.18123   | 5.55303    |
| NDFIP2    | 4.72562  | 4.84378   | 3.925    | 3.9342     | 4.49514   | 4.9824     |
| NDNF      | 1.20786  | 1.35098 ? |          | -6.09892   | 4.04272   | 3.44304    |
| NDNL2     | 2.86317  | 3.33158   | 2.77359  | 3.52234    | 2.65258   | 3.31566    |
| NDOR1     | 1.66727  | 1.50874   | 1.65571  | 1.8512     | 1.28225   | 1.23585    |
| NDP       | -4.37417 | -2.6546   | -1.79072 | -0.916649  | 1.69157   | 2.80064    |
| NDRG1     | 5.33949  | 5.44027   | 6.63745  | 6.63492    | 6.30129   | 4.81291    |
| NDRG2     | 1.19579  | 0.996642  | 0.871828 | 0.761609   | -4.65668  | -3.70484   |
| NDRG3     | 4.60925  | 4.66027   | 4.65568  | 4.97398    | 4.88366   | 4.9299     |
| NDRG4     | 2.74801  | 2.70709   | 1.82213  | 2.03075    | 3.86911   | 4.24311    |
| NDST1     | 5.32811  | 5.0558    | 6.26507  | 6.36206    | 5.94398   | 5.64917    |
| NDST2     | 2.69507  | 2.62381   | 2.45926  | 2.67397    | 2.75616   | 3.06865    |
| NDUFA1    | 3.5491   | 3.51129   | 4.32183  | 4.71273    | 5.42922   | 6.26794    |

|            |           |            |          |            |           |          |
|------------|-----------|------------|----------|------------|-----------|----------|
| NDUFA10    | 5.24233   | 5.18236    | 4.84438  | 5.12897    | 5.48402   | 5.31147  |
| NDUFA11    | 4.07507   | 3.73573    | 3.12918  | 3.24365    | 4.76457   | 5.46684  |
| NDUFA12    | 3.6047    | 3.74904    | 3.15187  | 3.71294    | 3.47668   | 4.27199  |
| NDUFA13    | 4.70747   | 4.71028    | 4.1694   | 4.39298    | 5.81923   | 6.78981  |
| NDUFA2     | 3.72718   | 3.67158    | 3.79375  | 4.08715    | 4.013     | 5.1843   |
| NDUFA3     | 2.8735    | 2.7675     | 2.7251   | 3.20511    | 4.13604   | 4.50641  |
| NDUFA4     | 5.76459   | 5.83691    | 5.62027  | 6.09259    | 5.73177   | 6.86266  |
| NDUFA5     | 4.37      | 4.59312    | 4.07223  | 4.53267    | 4.36138   | 5.13013  |
| NDUFA5P11  | 1.59351   | 1.61923    | 1.10544  | 1.50303    | 1.42176   | 2.43273  |
| NDUFA6     | 3.73554   | 3.6113     | 4.74573  | 5.14855    | 4.12512   | 4.72374  |
| NDUFA6-AS1 | 0.646227  | 0.569608   | 0.138526 | -0.0212303 | -0.230024 | 0.374155 |
| NDUFA7     | 2.78067   | 2.558      | 2.29024  | 2.57251    | 3.20548   | 3.83251  |
| NDUFA8     | 2.91379   | 2.87478    | 3.0308   | 3.50588    | 3.15668   | 3.64643  |
| NDUFA9     | 4.78337   | 4.87646    | 4.74056  | 5.14593    | 4.34674   | 4.78378  |
| NDUFA9P1   | 1.62351   | 1.73686    | 1.82213  | 1.8912     | 0.75262   | 0.832509 |
| NDUFAB1    | 3.93481   | 3.85795    | 3.5427   | 3.99052    | 4.09706   | 4.79512  |
| NDUFAF1    | 2.41207   | 2.42895    | 2.13391  | 2.25751    | 3.04878   | 3.53407  |
| NDUFAF2    | 2.03143   | 2.11902    | 2.54121  | 3.0012     | 3.14282   | 3.96285  |
| NDUFAF3    | 3.36919   | 3.59634    | 2.65726  | 3.31311    | 2.88238   | 3.96724  |
| NDUFAF4    | 2.2198    | 2.40753    | 1.37111  | 1.90242    | 3.22233   | 3.86883  |
| NDUFAF5    | 3.6352    | 3.64306    | 3.38633  | 3.44768    | 3.02794   | 3.40443  |
| NDUFAF6    | 1.867     | 2.04497    | 1.496    | 1.81601    | 2.2496    | 2.91168  |
| NDUFAF7    | 3.98487   | 3.99989    | 3.47569  | 3.56357    | 4.34158   | 4.29835  |
| NDUFB1     | 3.34805   | 3.34932    | 2.66511  | 2.86272    | 3.62625   | 4.55656  |
| NDUFB10    | 3.97862   | 4.21311    | 3.84852  | 4.45627    | 4.37654   | 4.87165  |
| NDUFB11    | 4.4876    | 4.38213    | 4.4318   | 4.7862     | 3.94721   | 4.52237  |
| NDUFB2     | 4.5021    | 4.36138    | 3.63597  | 4.06957    | 5.078     | 6.19588  |
| NDUFB3     | 3.46701   | 3.51719    | 3.08084  | 3.63062    | 4.29699   | 5.46959  |
| NDUFB4     | 4.02701   | 4.06693    | 4.48677  | 4.88807    | 4.96063   | 5.50694  |
| NDUFB5     | 3.84395   | 3.96027    | 4.54609  | 4.92802    | 5.3141    | 6.18202  |
| NDUFB6     | 3.82645   | 3.94548    | 3.20018  | 3.78447    | 4.7852    | 6.04982  |
| NDUFB7     | 3.01346   | 2.64044    | 2.82772  | 3.16498    | 4.00148   | 5.00839  |
| NDUFB8     | 5.26563   | 5.54773    | 4.18346  | 4.68449    | 4.7619    | 5.18439  |
| NDUFB9     | 5.24496   | 5.42397    | 5.06384  | 5.64706    | 5.90193   | 6.49344  |
| NDUFC1     | 3.32363   | 3.30203    | 2.64039  | 3.03584    | 3.31421   | 3.7677   |
| NDUFC2     | 5.76911   | 5.62831    | 4.84882  | 5.21702    | 4.57306   | 4.92264  |
| NDUFS1     | 6.06449   | 6.09147    | 5.66508  | 6.00163    | 6.89651   | 7.11224  |
| NDUFS2     | 5.66231   | 5.44102    | 4.68914  | 4.89609    | 5.79423   | 5.68989  |
| NDUFS3     | 4.24396   | 4.33768    | 3.99095  | 4.52855    | 5.13878   | 5.84538  |
| NDUFS4     | 3.29386   | 3.42742    | 3.74277  | 4.20632    | 4.38817   | 5.43091  |
| NDUFS5     | 5.6854    | 5.57398    | 4.43393  | 4.83368    | 6.19118   | 6.9082   |
| NDUFS6     | 3.73763   | 3.76477    | 3.1134   | 3.68071    | 4.53506   | 4.65193  |
| NDUFS7     | 2.23687   | 1.87383    | 2.0493   | 2.49033    | 2.78718   | 3.40801  |
| NDUFS8     | 3.99004   | 3.74172    | 4.22374  | 4.65686    | 4.18125   | 4.62867  |
| NDUFV1     | 5.45667   | 5.34611    | 5.10418  | 5.46576    | 4.95623   | 5.01523  |
| NDUFV2     | 3.48675   | 3.59113    | 4.33636  | 4.69908    | 4.87275   | 5.60999  |
| NDUFV2P1   | 2.72316   | 2.74008    | 3.46392  | 3.9457     | 4.22769   | 4.90511  |
| NDUFV3     | 4.2123    | 4.1592     | 3.59455  | 3.66596    | 4.14865   | 3.92446  |
| NEAT1      | 10.7483   | 10.3549    | 12.3194  | 12.1531    | 10.7675   | 9.75982  |
| NEB        | 2.3316    | 2.41061    | 1.25116  | 1.30061    | 2.35372   | 1.54125  |
| NEBL       | -0.489437 | -0.0703908 | -2.48229 | -2.02079   | 5.01034   | 4.16364  |
| NECAB1     | 1.27071   | 1.3672     | -1.74367 | -1.2995    | 1.13735   | 0.857193 |

|          |          |           |           |            |            |            |
|----------|----------|-----------|-----------|------------|------------|------------|
| NECAB3   | 3.09046  | 2.6483    | 4.24932   | 4.38141    | 3.94517    | 3.52931    |
| NECAP1   | 4.53036  | 4.685     | 4.11681   | 4.73353    | 4.71239    | 5.073      |
| NECAP2   | 4.34051  | 4.37241   | 4.54269   | 4.77304    | 5.19842    | 5.44555    |
| NEDD1    | 4.90361  | 5.0489    | 3.85676   | 4.18233    | 4.65086    | 4.97977    |
| NEDD4    | 5.8882   | 5.95234   | 6.46593   | 6.96655    | 6.8674     | 7.28497    |
| NEDD4L   | 6.25363  | 6.48641   | 4.05129   | 4.78218    | 3.36757    | 3.40703    |
| NEDD8    | 5.42723  | 5.4559    | 4.3874    | 4.82964    | 5.95254    | 6.2967     |
| NEDD9    | 4.41334  | 4.53432   | 3.606     | 3.35061    | 6.48005    | 5.84161    |
| NEGR1    | 2.96449  | 3.50869   | -2.37543  | -3.78492   | 2.12107    | 3.05151    |
| NEIL1    | 1.79773  | 1.48217   | 1.46519   | 1.41662    | 1.44676    | 0.421781   |
| NEIL2    | 2.77869  | 2.82256   | 2.02595   | 2.41082    | 3.18361    | 2.98329    |
| NEIL3    | 3.12747  | 3.27525   | 4.3302    | 4.7761     | 3.24658    | 3.49786    |
| NEK1     | 3.11471  | 3.24279   | 3.342     | 3.375      | 3.68065    | 3.78313    |
| NEK10    | 2.67162  | 2.84322   | 2.23012   | 2.02048    | 2.75755    | 3.028      |
| NEK11    | -1.37679 | -0.970724 | 0.558032  | 0.810106   | 0.983605   | 1.41227    |
| NEK2     | 4.41965  | 4.6604    | 4.14173   | 4.77376    | 4.21997    | 4.6117     |
| NEK3     | 0.409538 | 0.444137  | 1.20023   | 1.49854    | 1.93963    | 2.23582    |
| NEK4     | 4.81055  | 4.81959   | 4.32823   | 4.52353    | 4.8951     | 4.82024    |
| NEK6     | 4.56887  | 4.10225   | 4.38822   | 4.56624    | 4.88803    | 4.3781     |
| NEK7     | 5.10018  | 5.541     | 4.86767   | 5.32943    | 5.16703    | 5.84451    |
| NEK8     | 0.35629  | -0.292758 | 0.814903  | 0.367002   | 0.258664   | 0.151378   |
| NEK9     | 3.29535  | 3.03456   | 4.63366   | 4.68035    | 4.37656    | 4.18888    |
| NELFA    | 2.41988  | 2.29872   | 2.0405    | 2.07607    | 2.64804    | 2.5317     |
| NELFB    | 3.43407  | 3.23064   | 3.0926    | 3.27919    | 3.81441    | 3.85933    |
| NELFCD   | 6.10766  | 6.04618   | 4.92238   | 5.15444    | 6.04574    | 5.85885    |
| NELFE    | 4.5811   | 4.65414   | 4.01982   | 4.66018    | 5.0535     | 5.56357    |
| NELL2    | 2.58864  | 2.57883   | -6.17309  | -4.52056   | -2.65941   | -4.11926   |
| NEMF     | 5.3116   | 5.23895   | 4.41539   | 4.57976    | 4.74982    | 4.86573    |
| NEMP1    | 4.93207  | 4.98421   | 5.97892   | 6.24043    | 4.91715    | 5.04147    |
| NEMP2    | 3.73554  | 3.79218   | 2.94319   | 3.3258     | 2.79913    | 2.92992    |
| NENF     | 4.3002   | 4.34689   | 3.55963   | 3.86845    | 4.03751    | 4.70373    |
| NEO1     | -1.1752  | -1.50825  | 6.16021   | 6.26699    | -1.37455   | -2.53597   |
| NES      | 8.49227  | 8.52698   | -0.206089 | -0.0426024 | 8.98728    | 8.36398    |
| NET1     | 4.54765  | 4.85964   | 4.0429    | 4.40688    | 4.59294    | 4.67373    |
| NETO2    | 5.03773  | 5.12024   | -3.59683  | -6.09892   | -3.6585    | -2.8983    |
| NEU1     | 5.1801   | 5.17559   | 4.92828   | 5.70135    | 6.06329    | 6.42774    |
| NEU3     | 4.42762  | 4.38108   | 3.76192   | 3.93146    | 3.68288    | 3.51729    |
| NEURL1B  | 0.05414  | 0.356426  | 2.63026   | 2.86842    | -0.235834  | -0.0939684 |
| NEURL4   | 3.46205  | 3.33805   | 3.87487   | 4.03321    | 4.06936    | 3.51709    |
| NEXN     | 2.44962  | 2.30204   | 3.17505   | 3.49322    | 3.46869    | 3.10548    |
| NF1      | 6.04741  | 5.96288   | 6.73526   | 6.62873    | 5.73289    | 5.35352    |
| NF2      | 7.17924  | 6.88662   | 5.78475   | 5.95994    | 7.9107     | 7.56419    |
| NFASC    | 3.96803  | 4.04494   | -0.973801 | -0.327299  | -1.85245   | -2.53597   |
| NFAT5    | 5.92976  | 5.80215   | 7.07602   | 6.79164    | 6.53611    | 6.08159    |
| NFATC1   | 2.66287  | 2.35415   | 0.793829  | 0.913608   | -1.53062   | -1.12145   |
| NFATC2   | 5.25001  | 4.64502   | -0.598354 | -0.52367   | -0.217212  | -1.70626   |
| NFATC2IP | 4.60869  | 4.56988   | 4.57219   | 4.68721    | 4.62912    | 4.20167    |
| NFATC3   | 4.9178   | 4.86259   | 4.86388   | 4.95862    | 5.49359    | 5.44052    |
| NFATC4   | 3.2033   | 2.97803   | 2.17844   | 2.1152     | -6.64581 ? |            |
| NFE2L1   | 7.79785  | 7.77864   | 6.95729   | 7.26321    | 7.50468    | 7.23068    |
| NFE2L2   | 5.96753  | 5.93199   | 7.37229   | 7.28381    | 5.2762     | 5.31053    |
| NFE2L3   | 7.35115  | 7.49635   | 5.90125   | 6.33332    | 5.05992    | 5.42699    |

|          |           |          |          |           |            |             |
|----------|-----------|----------|----------|-----------|------------|-------------|
| NFE2L3P1 | 2.16317   | 2.40918  | 0.157044 | 0.845903  | -0.267833  | -0.00308489 |
| NFIA     | 3.82056   | 4.18101  | 3.0525   | 2.786     | 2.30549    | 2.92265     |
| NFIB     | 5.87526   | 6.08015  | 4.73758  | 5.01916   | 6.17441    | 6.45342     |
| NFIC     | 3.87267   | 3.46937  | 4.17841  | 3.98392   | 4.67842    | 4.31148     |
| NFIL3    | 2.8284    | 1.80397  | 3.51691  | 3.74915   | 2.31699    | 2.09421     |
| NFIX     | 3.26382   | 2.57608  | 3.80658  | 3.6208    | 5.19142    | 4.71639     |
| NFKB1    | 5.82744   | 5.88034  | 3.83746  | 4.20064   | 4.02532    | 4.04315     |
| NFKB2    | 4.63631   | 4.68878  | 2.77649  | 3.11518   | 2.58763    | 1.94436     |
| NFKBIA   | 5.25293   | 5.21134  | 4.73458  | 5.30585   | 4.01741    | 4.31009     |
| NFKBIB   | 2.27248   | 2.23414  | 1.62387  | 2.21312   | 2.4767     | 2.10709     |
| NFKBID   | 1.00834   | 1.3381   | 0.308431 | 0.798133  | -0.0163223 | -0.706491   |
| NFKBIE   | 3.78776   | 3.9497   | 2.53758  | 2.81599   | 2.04362    | 2.08772     |
| NFKBIL1  | 1.14646   | 1.20963  | 1.07392  | 1.2041    | 2.12107    | 2.37012     |
| NFKBIZ   | 4.29562   | 4.05344  | 4.52422  | 5.2429    | 2.83369    | 2.19397     |
| NFRKB    | 4.19421   | 4.15921  | 4.30129  | 4.50127   | 4.77433    | 4.34856     |
| NFS1     | 3.93027   | 3.97072  | 3.55794  | 3.80107   | 4.36066    | 4.24311     |
| NFU1     | 2.23758   | 2.26168  | 2.34397  | 3.05357   | 2.26748    | 3.24748     |
| NFX1     | 4.86075   | 4.90072  | 4.3459   | 4.60111   | 5.86521    | 5.71429     |
| NFXL1    | 3.56504   | 3.62001  | 2.65007  | 2.90521   | 3.77428    | 3.71375     |
| NFYA     | 4.4334    | 4.19358  | 4.43025  | 4.4313    | 4.73577    | 4.65083     |
| NFYB     | 3.89056   | 3.82486  | 3.43669  | 3.60713   | 3.03839    | 3.46286     |
| NFYC     | 3.49931   | 3.63824  | 3.79784  | 4.0985    | 3.87058    | 3.78001     |
| NFYC-AS1 | 1.52519   | 1.49532  | 2.55505  | 2.57325   | 0.972729   | 0.64308     |
| NGDN     | 4.12029   | 4.16742  | 2.63347  | 2.94917   | 3.5661     | 4.07628     |
| NGFR     | 4.3627    | 2.28126  | -4.59508 | -3.10759  | -4.33548   | -1.18284    |
| NGFRAP1  | 5.08757   | 4.93909  | 4.82977  | 5.11878   | 5.24433    | 5.69842     |
| NGLY1    | 3.93231   | 4.11945  | 3.91179  | 4.11999   | 4.64164    | 4.7981      |
| NGRN     | 5.63208   | 5.64495  | 5.33488  | 5.67623   | 6.05905    | 6.27        |
| NHEJ1    | 2.42654   | 2.3435   | 2.15453  | 2.33493   | 2.82058    | 3.17021     |
| NHLRC2   | 5.17666   | 5.23628  | 5.1806   | 5.08961   | 5.51086    | 5.14893     |
| NHLRC3   | 3.34805   | 3.57881  | 3.74128  | 3.94781   | 3.65484    | 4.21958     |
| NHP2     | 4.71727   | 4.81924  | 3.99978  | 4.57558   | 5.41941    | 6.20954     |
| NHP2P1   | 2.7025    | 2.81036  | 2.08362  | 2.5803    | 3.70644    | 3.89134     |
| NHS      | 3.3453    | 2.98631  | 3.21523  | 3.60714   | -1.01618   | -1.70626    |
| NHSL1    | 4.39897   | 4.45602  | 2.19587  | 1.87419   | 4.88657    | 4.70478     |
| NHSL2    | 1.23776   | 1.68721  | 1.39422  | 1.97366   | 2.02657    | 2.10079     |
| NICN1    | 2.70394   | 2.7269   | 2.97121  | 3.10792   | 2.62719    | 2.46765     |
| NID1     | 7.67027   | 7.73243  | 6.09106  | 5.99055   | 5.85241    | 5.19714     |
| NID2     | 5.49862   | 5.66801  | 4.45229  | 4.29644   | -2.81814   | -3.34576    |
| NIF3L1   | 3.74895   | 3.78508  | 3.00877  | 3.35674   | 3.8134     | 4.35398     |
| NIFK     | 5.01087   | 4.99562  | 3.52145  | 3.87655   | 5.26716    | 6.11725     |
| NIFK-AS1 | 2.58841   | 2.52514  | 2.10345  | 2.15952   | 1.89335    | 1.71476     |
| NIM1K    | -0.395122 | -1.07024 | -1.32519 | -0.616766 | 1.90196    | 1.2122      |
| NIN      | 6.13972   | 6.63519  | 5.10186  | 5.66801   | 5.52456    | 5.74654     |
| NINJ1    | 2.66507   | 2.41981  | 4.11224  | 4.72167   | 3.04706    | 2.85553     |
| NINL     | 3.78171   | 3.57471  | 2.28002  | 2.15329   | -2.75246   | -4.70296    |
| NIP7     | 4.69952   | 4.84049  | 4.07998  | 4.44207   | 6.05711    | 6.4517      |
| NIPA1    | 4.67705   | 4.73436  | 4.73608  | 5.01398   | 5.1965     | 4.7971      |
| NIPA2    | 5.47445   | 5.5527   | 5.18552  | 5.60055   | 6.00796    | 6.17669     |
| NIPAL1   | 3.21423   | 3.80448  | -3.92409 | -2.10853  | -1.61414   | -1.13601    |
| NIPAL3   | 5.16543   | 5.25179  | 3.60432  | 4.56445   | 5.52386    | 5.7593      |
| NIPBL    | 5.97577   | 5.82745  | 6.42008  | 6.21083   | 6.25273    | 6.07259     |

|           |            |           |            |             |           |           |
|-----------|------------|-----------|------------|-------------|-----------|-----------|
| NIPSNAP1  | 4.51341    | 4.64567   | 1.71133    | 2.01014     | 4.97541   | 5.43347   |
| NIPSNAP3A | 1.45578    | 1.70209   | 2.03567    | 2.27489     | 2.36207   | 3.5076    |
| NISCH     | 4.79025    | 4.52867   | 5.09201    | 5.05606     | 5.05092   | 4.46945   |
| NIT1      | 3.68902    | 3.73042   | 3.47232    | 3.72646     | 3.39429   | 3.54671   |
| NIT2      | 4.20931    | 4.19089   | 4.68914    | 4.68964     | 4.15906   | 4.43411   |
| NKAP      | 2.93755    | 2.73438   | 2.96877    | 3.21985     | 3.27927   | 3.51969   |
| NKILA     | 5.26483    | 5.57901   | 0.629333   | 0.654481    | 1.01434   | 0.93191   |
| NKIRAS1   | 3.21317    | 3.69844   | 2.40932    | 2.88806     | 3.72452   | 4.76028   |
| NKIRAS2   | 3.87745    | 3.80688   | 4.13886    | 4.44219     | 5.19623   | 5.22961   |
| NKRF      | 2.91011    | 3.0743    | 3.47634    | 3.74752     | 4.50657   | 4.54473   |
| NKTR      | 6.93731    | 6.85993   | 7.05858    | 6.85204     | 7.14491   | 6.37141   |
| NKX2-2    | 1.50144    | 1.35737   | -0.453959  | -0.725802 ? |           | ?         |
| NKX3-1    | 0.727258   | 1.20963   | 2.42012    | 3.08347     | 0.670686  | 0.863209  |
| NLE1      | 4.19422    | 4.12305   | 3.23019    | 3.66596     | 4.0199    | 4.09158   |
| NLGN1     | 3.6857     | 3.69954   | -5.1783    | -4.52056    | 3.0436    | 3.60389   |
| NLGN2     | 3.41857    | 3.27187   | 3.99763    | 3.59161     | 3.26004   | 2.78915   |
| NLGN4X    | 4.7759     | 4.59968   | -4.9135 ?  |             | 3.3411    | 3.46059   |
| NLGN4Y    | -4.00826   | -4.36068  | 1.75076    | 1.59165 ?   |           | -5.63497  |
| NLK       | 4.25148    | 4.47893   | 3.66667    | 3.79354     | 4.62855   | 4.65413   |
| NLN       | 4.49075    | 4.54977   | 4.72034    | 4.79128     | 5.36688   | 5.5424    |
| NLRC5     | 1.27251    | 1.74176   | 4.12595    | 4.28348     | 5.16663   | 4.96216   |
| NLRP1     | 3.58749    | 3.43801   | 3.44947    | 3.66596     | 1.43776   | 0.68568   |
| NLRX1     | 1.57708    | 0.988427  | 2.23435    | 1.92462     | 1.72342   | 1.06153   |
| NMB       | 2.8107     | 3.05286   | 0.00643448 | 0.619178    | 2.2008    | 3.10064   |
| NMD3      | 4.82777    | 4.98622   | 4.89009    | 5.36686     | 4.98038   | 5.59189   |
| NMD3P1    | -0.0513199 | 0.0310987 | -0.165243  | 0.506947    | -0.10558  | 0.522849  |
| NME1      | 6.71517    | 6.70205   | 5.34022    | 5.86365     | 6.6498    | 7.17946   |
| NME1-NME2 | 6.88957    | 6.76323   | 5.7681     | 6.25748     | 6.8574    | 7.645     |
| NME2      | 3.9371     | 3.6776    | 2.14715    | 3.0923      | 3.77317   | 4.51264   |
| NME2P1    | 3.79772    | 3.83827   | 2.83535    | 3.2914      | 3.81182   | 4.24739   |
| NME3      | 1.31777    | 1.20963   | 1.61741    | 1.78602     | 1.61584   | 2.99026   |
| NME4      | 3.46834    | 3.24796   | 4.31978    | 4.42645     | 4.55946   | 4.5412    |
| NME6      | 2.93936    | 3.12587   | 2.48538    | 2.87417     | 3.6053    | 3.51729   |
| NME7      | 3.85638    | 3.92549   | 3.32586    | 3.7601      | 4.19473   | 5.16247   |
| NME9      | 0.480917   | 0.570667  | 0.371169   | -0.0212318  | -0.217212 | -0.706493 |
| NMI       | 2.45575    | 2.62728   | 1.77651    | 2.01532     | 2.55645   | 3.32671   |
| NMNAT1    | 1.35625    | 1.37009   | 2.5273     | 2.80706     | 2.67509   | 2.63315   |
| NMNAT2    | 3.38705    | 3.5623    | 1.02599    | 2.09087     | 2.33406   | 2.90432   |
| NMRAL1    | 1.84835    | 1.89254   | 2.22164    | 2.45724     | -3.6585   | -2.70579  |
| NMRK1     | 0.923035   | 0.756391  | -0.325375  | -0.716287   | 0.679613  | 1.27061   |
| NMT1      | 6.23368    | 6.1704    | 6.10419    | 6.47635     | 6.42617   | 6.39326   |
| NMT2      | 2.99617    | 2.78156   | 4.70343    | 5.02859     | 3.25663   | 3.34278   |
| NNMT      | 4.20329    | 3.05286   | 4.8291     | 5.65062     | 4.0323    | 4.38604   |
| NNT       | 5.52917    | 5.58529   | 5.96281    | 6.26656     | 5.9721    | 6.18286   |
| NNT-AS1   | 2.86851    | 2.94867   | 2.89679    | 2.98292     | 3.69232   | 3.54778   |
| NOA1      | 3.01179    | 3.04479   | 2.62711    | 3.0437      | 4.74492   | 5.06505   |
| NOB1      | 3.89108    | 3.90362   | 3.8349     | 4.20467     | 4.85394   | 5.06348   |
| NOC2L     | 5.78297    | 5.76056   | 5.05536    | 5.47062     | 6.46441   | 6.57386   |
| NOC3L     | 4.95107    | 5.04691   | 4.16188    | 4.45436     | 5.5664    | 6.22325   |
| NOC4L     | 1.53936    | 1.3381    | 1.30838    | 1.67257     | 1.09463   | 1.51249   |
| NOCT      | 3.49936    | 3.57333   | 2.48183    | 2.82192     | 3.34812   | 2.79712   |
| NOD1      | 3.16343    | 3.13864   | 2.85155    | 2.77809     | 2.31894   | 1.96541   |

|              |           |           |          |           |           |           |
|--------------|-----------|-----------|----------|-----------|-----------|-----------|
| NOL10        | 4.67566   | 4.7906    | 3.67081  | 3.92579   | 5.02948   | 5.42877   |
| NOL11        | 4.85335   | 4.99053   | 4.63959  | 5.04144   | 5.56492   | 6.23032   |
| NOL12        | 3.23018   | 3.05286   | 2.62062  | 2.76155   | 2.47669   | 2.41742   |
| NOL3         | 1.99629   | 2.10208   | 2.84605  | 3.17382   | 3.519     | 3.73175   |
| NOL4L        | 4.6275    | 4.61516   | 4.99325  | 4.92419   | 4.07212   | 3.69594   |
| NOL6         | 5.61041   | 5.56125   | 4.22374  | 4.66431   | 6.70453   | 6.53586   |
| NOL7         | 3.73559   | 4.00268   | 3.34639  | 3.95502   | 4.72306   | 5.27954   |
| NOL8         | 4.95286   | 4.93264   | 4.1817   | 4.44605   | 4.65771   | 4.64971   |
| NOL9         | 5.14012   | 5.34087   | 4.59783  | 5.12777   | 5.27742   | 5.00838   |
| NOLC1        | 6.76711   | 6.7726    | 5.57426  | 5.97662   | 7.05406   | 6.87963   |
| NOM1         | 5.06785   | 5.12305   | 4.4275   | 4.67089   | 3.81644   | 3.38074   |
| NOMO1        | 6.89233   | 6.73354   | 6.68198  | 6.92089   | 6.23338   | 6.09572   |
| NOMO2        | 6.40278   | 6.31293   | 6.69123  | 7.08224   | 6.36714   | 6.23209   |
| NOMO3        | 5.67737   | 5.61906   | 6.17192  | 6.4477    | 5.87775   | 5.71754   |
| NONO         | 7.77344   | 7.51143   | 7.5836   | 7.64235   | 8.30649   | 7.66209   |
| NOP10        | 5.14561   | 5.01136   | 3.80516  | 4.19609   | 5.26559   | 5.92851   |
| NOP14        | 4.98283   | 4.95612   | 4.11113  | 4.47071   | 5.4376    | 5.25545   |
| NOP14-AS1    | 3.13926   | 3.04086   | 2.58782  | 2.5733    | 3.25773   | 2.93704   |
| NOP16        | 4.35717   | 4.29419   | 3.32223  | 3.75177   | 5.05968   | 5.45832   |
| NOP2         | 5.54765   | 5.59344   | 4.52814  | 4.94712   | 4.98849   | 5.00752   |
| NOP56        | 7.02831   | 6.99687   | 6.89953  | 7.10062   | 6.39738   | 6.1846    |
| NOP58        | 6.0908    | 6.1008    | 4.68293  | 5.09451   | 5.85609   | 6.1636    |
| NOP9         | 4.91431   | 4.9376    | 4.10831  | 4.37453   | 5.03968   | 4.95741   |
| NOS1AP       | 2.05861   | 1.91161   | -2.5977  | -1.86039  | 1.67188   | 1.67185   |
| NOSIP        | 3.23903   | 3.0568    | 3.21736  | 3.78599   | 3.90003   | 4.68774   |
| NOSTRIN      | 1.85937   | 1.97597   | 1.12941  | 1.01017   | 1.1471    | 0.483199  |
| NOTCH1       | 3.60127   | 3.12775   | 2.48183  | 2.24874   | 2.41117   | 2.1262    |
| NOTCH2       | 7.68703   | 7.79376   | 7.78485  | 8.13992   | 8.38486   | 8.08125   |
| NOTCH2NL     | 5.50243   | 5.42534   | 5.41067  | 5.37673   | 4.41002   | 4.10832   |
| NOTUM        | -1.27248  | -3.00228  | -6.17309 | -4.10635  | 1.88661   | 2.48805   |
| NOV          | 3.58401   | 3.025     | 2.43854  | 3.19496   | -4.07293  | -1.79933  |
| NOVA1        | 1.71458   | 1.60328 ? |          | -6.09892  | 1.68845   | 1.72795   |
| NPAS2        | 5.30673   | 4.98397   | 1.63043  | 1.7255    | 0.814206  | 0.173882  |
| NPAS3        | -0.255978 | -0.46266  | 3.83189  | 3.53864   | 3.88078   | 3.01439   |
| NPAT         | 3.54559   | 3.58109   | 5.25546  | 5.40714   | 4.54519   | 4.76616   |
| NPC1         | 4.83828   | 4.83207   | 5.97659  | 6.67597   | 4.26117   | 4.06123   |
| NPC2         | 4.86175   | 4.61462   | 4.21415  | 4.50863   | 4.59294   | 4.98591   |
| NPDC1        | -0.549135 | -0.629746 | 2.61091  | 2.66926   | 1.15352   | 1.56945   |
| NPEPL1       | 2.75697   | 2.20521   | 2.0389   | 1.99019   | 2.89379   | 2.83388   |
| NPEPPS       | 5.95219   | 5.86756   | 6.3014   | 6.23512   | 6.12355   | 5.90494   |
| NPHP1        | 1.82058   | 1.85459   | 1.43123  | 1.64609   | 1.77851   | 2.03478   |
| NPHP3        | 3.82252   | 3.7716    | 3.99699  | 3.94831   | 3.5245    | 2.9676    |
| NPHP3-ACAD11 | 0.804483  | 0.731479  | 0.231654 | -0.201254 | -0.103888 | 0.2931    |
| NPHP4        | 2.75831   | 2.51158   | 3.03565  | 3.0586    | 2.61583   | 2.3377    |
| NPIPA1       | 3.27332   | 3.02163   | 3.62535  | 3.6505    | 3.02525   | 2.5586    |
| NPIPA2       | 0.607872  | 0.464836  | 0.974948 | 1.16467   | 0.451509  | -0.836192 |
| NPIPA5       | -0.509136 | -0.80933  | 1.02462  | 1.17349   | -0.569486 | -1.73922  |
| NPIPB11      | 0.250113  | 0.197941  | 0.433387 | 0.282487  | -0.425174 | -0.604174 |
| NPIPB3       | 2.79068   | 2.50988   | 3.04208  | 3.04822   | 1.90799   | 1.72346   |
| NPIPB4       | 3.29593   | 3.3364    | 3.96712  | 3.97097   | 3.14202   | 2.36238   |
| NPIPB5       | 4.65151   | 4.55133   | 5.28624  | 5.13504   | 4.27416   | 3.60747   |
| NPIPB9       | -0.29928  | -0.053925 | 0.981823 | 0.72534   | 0.183353  | 0.148374  |



|           |            |            |            |           |           |           |
|-----------|------------|------------|------------|-----------|-----------|-----------|
| NPIPP1    | 0.301599   | 0.505921   | 1.65582    | 1.49793   | 0.823912  | -0.151612 |
| NPL       | 2.27248    | 2.40136    | -0.598354  | 0.445854  | -1.61549  | -0.752286 |
| NPLOC4    | 6.69378    | 6.67446    | 6.47066    | 6.77591   | 7.35392   | 7.11245   |
| NPM1      | 7.95482    | 7.96158    | 7.98672    | 8.41988   | 8.73297   | 9.24865   |
| NPM1P12   | -0.367843  | -0.0946522 | -0.430046  | 0.248365  | 0.256685  | 1.14266   |
| NPM1P18   | 0.216697   | -0.27666   | 0.0321714  | 0.976144  | 0.566533  | 1.74317   |
| NPM1P19   | 1.40964    | 1.12925    | 1.10487    | 1.96302   | 1.59708   | 2.38977   |
| NPM1P24   | 3.83641    | 3.94536    | 4.12226    | 4.36839   | 4.6861    | 4.99087   |
| NPM1P26   | 1.10242    | 1.03757    | 1.5056     | 1.5474    | 1.42602   | 1.57935   |
| NPM1P27   | 7.2786     | 7.26081    | 7.43683    | 7.79054   | 8.1195    | 8.60034   |
| NPM1P29   | -0.413499  | -0.333394  | 1.73537    | 1.195     | 1.51964   | 0.769095  |
| NPM1P39   | 4.23438    | 4.27906    | 4.37902    | 4.82134   | 5.03175   | 5.57385   |
| NPM1P46   | 0.780176   | 1.04516    | 0.732877   | 1.22222   | 1.61065   | 2.01832   |
| NPM1P5    | -0.0400162 | -0.0479677 | 0.242816   | 0.740392  | 1.04004   | 1.50186   |
| NPM1P6    | 3.4832     | 3.44057    | 3.4564     | 4.12945   | 4.30775   | 4.78362   |
| NPM3      | 3.1131     | 3.26508    | 2.46395    | 2.91077   | 3.17731   | 3.66832   |
| NPR2      | 2.49774    | 2.07616    | 3.22074    | 3.18103   | 1.83353   | 1.5077    |
| NPR3      | 2.50551    | 1.72701    | 0.0833836  | 0.46112   | 3.01034   | 2.42259   |
| NPRL2     | 3.62895    | 3.67523    | 3.03527    | 3.48374   | 3.84556   | 4.05162   |
| NPRL3     | 1.38458    | 1.10427    | 2.89238    | 2.67214   | 2.16735   | 1.92229   |
| NPTN      | 5.74979    | 5.59243    | 5.578      | 5.88055   | 5.56066   | 5.29258   |
| NPTN-IT1  | 1.80477    | 1.65093    | 1.92503    | 1.77384   | 1.37315   | 0.615294  |
| NPTX1     | ?          | -6.45019   | 3.50821    | 3.81599   | -2.65941  | -3.12051  |
| NPTXR     | 0.863225   | 0.61405    | 3.67756    | 3.54042   | -3.48878  | -2.8983   |
| NQO1      | 6.93109    | 6.98809    | 9.57494    | 9.89164   | 8.65995   | 9.46313   |
| NQO2      | 2.15518    | 2.43669    | 4.65644    | 5.04984   | 3.36832   | 3.19374   |
| NR1D1     | 0.0021048  | -0.394367  | 1.23829    | 1.39675   | 1.34822   | 1.21972   |
| NR1D2     | 5.04282    | 5.24882    | 4.18389    | 4.83661   | 5.35022   | 5.77861   |
| NR1H2     | 3.25075    | 2.99659    | 3.0926     | 3.54402   | 4.29388   | 4.71849   |
| NR1H3     | 0.685662   | 0.604081   | 2.34037    | 2.69611   | 0.724511  | 0.769602  |
| NR2C1     | 3.64522    | 3.513      | 3.7663     | 3.67744   | 3.39226   | 3.14816   |
| NR2C2     | 6.0169     | 6.0086     | 5.61335    | 5.66668   | 6.14894   | 5.77724   |
| NR2C2AP   | 3.00571    | 2.78899    | 2.02467    | 2.38121   | 3.03712   | 3.31274   |
| NR2E1     | ?          | ?          | -6.17309   | -6.09892  | 2.85342   | 3.02801   |
| NR2F1     | 1.0603     | 0.581631   | 6.5491     | 6.05793   | 4.2122    | 3.86275   |
| NR2F1-AS1 | 1.82582    | 1.73194    | 4.79926    | 4.49302   | 2.99651   | 2.87527   |
| NR2F2     | 4.2168     | 4.52087    | 2.81366    | 3.03584   | 3.16624   | 3.47319   |
| NR2F2-AS1 | 1.78553    | 2.10695    | 0.30688    | 0.382922  | -0.895194 | -1.36737  |
| NR2F6     | 3.25221    | 3.11836    | 2.93283    | 3.07109   | 4.12104   | 4.00064   |
| NR3C1     | 5.49967    | 5.48149    | 6.76569    | 6.83001   | 6.78374   | 6.85145   |
| NR3C2     | 1.18361    | 1.15192    | -0.0748604 | -0.301307 | 0.606556  | 0.200291  |
| NR4A1     | 5.0562     | 5.28426    | 0.138369   | 0.139221  | -0.511857 | -0.421133 |
| NR4A2     | 3.41336    | 2.6483     | -2.37543   | -1.64896  | -0.250761 | -1.12145  |
| NR6A1     | 2.69539    | 2.33159    | 2.37108    | 1.96266   | 1.94334   | 1.15132   |
| NRAS      | 6.38804    | 6.45059    | 5.54141    | 6.06015   | 7.6597    | 7.84726   |
| NRAV      | 2.2696     | 2.27188    | 1.88797    | 2.24434   | 2.18206   | 2.42258   |
| NRBF2     | 3.18637    | 3.23863    | 2.48073    | 2.90435   | 4.04671   | 4.19414   |
| NRBP1     | 5.43338    | 5.34009    | 4.92106    | 5.1725    | 5.91943   | 6.4735    |
| NRBP2     | 2.10184    | 2.12214    | 3.1603     | 3.29844   | 3.41233   | 3.10048   |
| NRCAM     | 0.520176   | 0.370142   | 5.70938    | 5.77495   | 6.78943   | 7.04419   |
| NRD1      | 6.55715    | 6.5865     | 6.59476    | 6.89268   | 6.73083   | 6.86746   |
| NRDE2     | 4.49185    | 4.29312    | 3.22559    | 3.20021   | 3.67832   | 3.28679   |

|          |            |          |          |          |           |           |
|----------|------------|----------|----------|----------|-----------|-----------|
| NREP     | 4.55972    | 4.51821  | 4.39844  | 4.21839  | 4.93685   | 4.78423   |
| NRF1     | 3.48579    | 3.39358  | 2.95091  | 3.23547  | 3.05394   | 3.1325    |
| NRG1     | 3.02202    | 3.06072  | 5.97381  | 6.38201  | 3.93214   | 3.55773   |
| NRG2     | 0.243547   | 0.318612 | 1.05494  | 1.31748  | 2.0778    | 2.02123   |
| NRIP1    | 7.0684     | 6.79418  | 6.49223  | 6.49906  | 5.57384   | 5.89459   |
| NRIP3    | 1.29532    | 1.3764   | -4.18092 | -4.10635 | 2.42717   | 2.82468   |
| NRM      | 3.07901    | 3.07244  | 3.53758  | 3.73038  | 2.93775   | 2.80109   |
| NRN1     | 2.5055     | 2.43198  | 3.16077  | 3.61227  | 2.55159   | 2.32121   |
| NRP1     | 6.34644    | 6.52478  | 6.14825  | 6.63483  | 7.60001   | 7.63826   |
| NRP2     | 6.58963    | 6.86023  | 4.9238   | 5.80922  | 9.46036   | 9.59959   |
| NRSN2    | 3.56301    | 3.39202  | 4.5117   | 4.70495  | 3.84151   | 4.06311   |
| NRXN3    | 4.32675    | 4.65739  | 2.12028  | 2.32582  | 1.91336   | 1.90802   |
| NSA2     | 4.65489    | 4.8239   | 4.61561  | 5.33835  | 5.66014   | 6.45399   |
| NSD1     | 6.33182    | 6.3284   | 6.81839  | 6.82633  | 6.86827   | 6.64491   |
| NSDHL    | 4.4009     | 4.35414  | 3.62383  | 4.07233  | 3.69944   | 3.87071   |
| NSF      | 5.14603    | 5.31712  | 4.93587  | 5.37128  | 5.60235   | 5.91422   |
| NSFL1C   | 4.82203    | 4.86695  | 5.49594  | 5.80106  | 4.44428   | 4.40832   |
| NSFP1    | 2.26368    | 2.08535  | 1.07675  | 0.272107 | -0.15233  | 0.985464  |
| NSL1     | 4.11789    | 4.18281  | 4.17951  | 4.43614  | 4.23828   | 4.83534   |
| NSMAF    | 4.16045    | 4.19982  | 4.19151  | 4.63768  | 4.20773   | 4.27343   |
| NSMCE1   | 2.84782    | 2.80862  | 3.23644  | 3.62926  | 3.21467   | 3.80504   |
| NSMCE2   | 3.11631    | 3.18104  | 2.97635  | 3.2878   | 3.24808   | 4.25039   |
| NSMCE4A  | 3.71962    | 3.71443  | 2.83393  | 3.10151  | 3.68333   | 4.25159   |
| NSMF     | 3.29527    | 2.78034  | 3.77213  | 3.92322  | 3.62624   | 3.38604   |
| NSRP1    | 3.40084    | 3.33985  | 4.21972  | 4.50027  | 4.39208   | 4.06429   |
| NSRP1P1  | 0.307382   | 0.393866 | 0.684253 | 0.492294 | 0.541782  | -0.3042   |
| NSUN2    | 5.96093    | 6.00654  | 5.41637  | 5.7757   | 6.13084   | 5.87779   |
| NSUN3    | 2.52214    | 2.52162  | 3.06832  | 3.31328  | 2.67848   | 2.71211   |
| NSUN4    | 4.47272    | 4.54277  | 4.02227  | 4.31638  | 4.29824   | 4.24018   |
| NSUN5    | 0.631384   | 0.288595 | 1.51082  | 1.83826  | 1.44912   | 1.29906   |
| NSUN5P1  | 4.20771    | 4.19515  | 4.51772  | 4.53119  | 4.63444   | 4.08892   |
| NSUN5P2  | 1.536      | 1.60718  | 1.9645   | 2.19911  | 2.06239   | 1.81902   |
| NSUN6    | 2.42247    | 2.57059  | 1.69303  | 1.71138  | 2.81137   | 2.87072   |
| NT5C     | 2.99854    | 2.92876  | 2.90773  | 2.80953  | 3.22432   | 3.81426   |
| NT5C2    | 3.91361    | 4.01088  | 5.5421   | 5.79871  | 5.68136   | 5.57427   |
| NT5C3A   | 3.80169    | 4.03352  | 3.56995  | 3.97187  | 3.69826   | 4.00621   |
| NT5C3AP1 | 1.16561    | 1.52292  | 1.14603  | 1.4076   | 1.31169   | 1.43048   |
| NT5C3B   | 3.56301    | 3.41673  | 3.75605  | 4.08716  | 4.12841   | 4.41611   |
| NT5DC1   | 2.84129    | 3.01108  | 3.86731  | 4.27191  | 3.30431   | 4.03465   |
| NT5DC2   | 5.20768    | 4.86745  | 4.25111  | 4.33095  | 5.0836    | 4.70267   |
| NT5DC3   | 4.69859    | 4.7405   | 3.37872  | 3.77839  | 5.60089   | 4.81782   |
| NT5E     | 6.9905     | 7.60592  | 4.15074  | 5.79728  | 4.16386   | 5.64311   |
| NTAN1    | 3.22719    | 3.13056  | 2.88883  | 3.23898  | 2.60271   | 2.80962   |
| NTAN1P2  | 0.00124018 | 0.212021 | 0.517004 | 0.659431 | 0.0812851 | -0.309336 |
| NTHL1    | 2.77055    | 2.37635  | 1.67924  | 1.89682  | 1.97989   | 2.68122   |
| NTM      | 4.87449    | 5.10837  | -5.1783  | -3.78492 | 1.83949   | 2.46823   |
| NTMT1    | 3.10977    | 2.95184  | 2.71592  | 3.24671  | 3.86589   | 4.12425   |
| NTN1     | 2.01175    | 2.03702  | 1.02599  | 2.18581  | -1.23372  | -1.38442  |
| NTN4     | 4.1179     | 4.50152  | 1.83331  | 2.45343  | 4.4508    | 4.29609   |
| NTNG1    | 2.64966    | 2.34452  | -5.1783  | -4.10635 | 2.77433   | 2.99373   |
| NTNG2    | -3.37567   | -2.87684 | 1.51     | 1.60545  | -3.85089  | -3.12051  |
| NTPCR    | 4.33865    | 4.37576  | 5.37034  | 5.48523  | 4.29009   | 4.56143   |

|          |          |          |           |          |          |          |
|----------|----------|----------|-----------|----------|----------|----------|
| NTRK3    | -5.69162 | -6.45019 | -2.5977   | -2.40763 | 2.8962   | 3.79711  |
| NUAK1    | 3.51767  | 3.47085  | 2.84715   | 3.33825  | 3.55158  | 3.60163  |
| NUAK2    | 1.60474  | 2.01586  | 2.1019    | 2.44577  | 3.43373  | 3.67482  |
| NUB1     | 4.75686  | 4.90536  | 4.95163   | 5.54991  | 5.15503  | 5.56649  |
| NUBP1    | 2.78714  | 2.72621  | 2.09253   | 2.38393  | 2.48217  | 2.79665  |
| NUBP2    | 3.08064  | 2.84777  | 2.74722   | 2.86272  | 2.90194  | 3.49296  |
| NUBPL    | 2.50794  | 2.55397  | 2.08796   | 2.05107  | 2.32554  | 2.44812  |
| NUCB1    | 5.80175  | 5.60388  | 5.87305   | 5.95812  | 5.86054  | 5.7486   |
| NUCB2    | 4.5213   | 4.50797  | 4.91713   | 5.56536  | 3.73736  | 3.99546  |
| NUCKS1   | 8.20242  | 8.15214  | 8.05622   | 8.13813  | 8.5465   | 8.53987  |
| NUDC     | 5.46688  | 5.3589   | 4.61899   | 5.05809  | 5.72656  | 5.56904  |
| NUDCD1   | 5.26743  | 5.39474  | 4.42749   | 4.81078  | 4.79346  | 5.64311  |
| NUDCD2   | 3.55476  | 3.58154  | 4.12822   | 4.16029  | 4.43442  | 4.4174   |
| NUDCD3   | 5.50364  | 5.52548  | 5.68608   | 5.87734  | 5.49291  | 5.56005  |
| NUDT1    | 3.1805   | 3.20427  | 3.31234   | 3.64606  | 3.38818  | 3.98851  |
| NUDT11   | 1.16882  | 1.12217  | 2.52827   | 2.78941  | 1.01848  | 0.893261 |
| NUDT12   | 3.56301  | 3.58156  | 3.42381   | 3.50034  | 3.85931  | 4.29891  |
| NUDT13   | 1.0472   | 1.18944  | -0.111639 | 0.179893 | 0.840499 | 0.133682 |
| NUDT15   | 4.04154  | 4.11269  | 2.96114   | 3.38703  | 4.16146  | 4.32808  |
| NUDT16   | 2.64966  | 2.37322  | 3.92368   | 4.11153  | 4.03754  | 3.41998  |
| NUDT16L1 | 2.35893  | 2.03304  | 2.1019    | 2.37097  | 3.05051  | 3.45568  |
| NUDT18   | 0.727258 | 0.581631 | 1.18285   | 1.77994  | 0.823578 | 1.27061  |
| NUDT19   | 2.6296   | 2.6587   | 2.58467   | 3.00231  | 3.31697  | 2.82467  |
| NUDT2    | 1.60474  | 1.3764   | 2.63027   | 2.9892   | 3.19766  | 4.12617  |
| NUDT21   | 6.46691  | 6.46177  | 6.61555   | 6.80197  | 7.5035   | 7.5269   |
| NUDT22   | 2.94331  | 2.9309   | 2.56545   | 2.95467  | 2.78734  | 3.12342  |
| NUDT3    | 5.32892  | 5.43825  | 5.68047   | 5.88603  | 6.63501  | 6.58112  |
| NUDT4    | 5.73529  | 5.86106  | 4.65269   | 5.09919  | 5.68957  | 5.93395  |
| NUDT4P1  | 2.52567  | 2.30411  | 0.312514  | 1.41699  | 2.53119  | 2.76398  |
| NUDT4P2  | 1.96423  | 2.55241  | 1.21032   | 1.55132  | 1.52579  | 2.21808  |
| NUDT5    | 5.09666  | 5.02154  | 4.27434   | 4.52908  | 5.38818  | 5.61904  |
| NUDT6    | 2.31455  | 2.48245  | 3.10138   | 3.39412  | 1.71147  | 1.7239   |
| NUDT9    | 3.29668  | 3.29205  | 2.54781   | 2.72723  | 2.86913  | 2.73624  |
| NUF2     | 4.9389   | 5.04443  | 4.10649   | 4.28026  | 4.79707  | 5.4831   |
| NUFIP1   | 2.93454  | 2.88185  | 2.06357   | 2.35925  | 2.55731  | 2.86889  |
| NUFIP1P  | 0.536162 | 0.754682 | 0.311329  | 0.078883 | 0.584299 | 0.776929 |
| NUFIP2   | 6.87609  | 6.97438  | 7.49715   | 7.79033  | 7.89948  | 7.89434  |
| NUMA1    | 7.16624  | 7.18954  | 6.98019   | 7.07092  | 6.24772  | 6.04157  |
| NUMB     | 4.52008  | 4.35573  | 4.70781   | 4.73772  | 4.4185   | 3.94613  |
| NUMBL    | 1.74389  | 1.77559  | 2.68685   | 2.80107  | 3.11118  | 2.919    |
| NUP107   | 5.40347  | 5.51386  | 4.5895    | 4.97661  | 4.81223  | 5.24227  |
| NUP133   | 5.13696  | 5.26846  | 4.66117   | 5.13672  | 4.94052  | 5.20242  |
| NUP153   | 6.41456  | 6.41365  | 5.98021   | 6.03761  | 6.41821  | 6.30559  |
| NUP155   | 6.46626  | 6.31235  | 6.20451   | 6.28907  | 6.52052  | 6.31772  |
| NUP160   | 5.8025   | 5.79511  | 5.77862   | 6.05577  | 6.01235  | 5.96834  |
| NUP188   | 5.68569  | 5.64075  | 4.87446   | 5.09634  | 5.58195  | 5.3721   |
| NUP205   | 7.18306  | 7.26348  | 6.49283   | 6.82944  | 6.50601  | 6.45474  |
| NUP210   | ?        | ?        | -5.1783   | -3.78492 | 5.75466  | 5.16287  |
| NUP214   | 4.9668   | 4.91656  | 4.73072   | 4.83506  | 4.9716   | 4.61427  |
| NUP35    | 3.59554  | 3.65733  | 2.15188   | 2.63938  | 3.54425  | 4.13249  |
| NUP37    | 4.03308  | 3.86695  | 3.20665   | 3.58814  | 3.43245  | 4.19565  |
| NUP43    | 5.18584  | 5.26421  | 4.83536   | 5.18923  | 5.8861   | 6.03167  |

|            |           |          |            |           |           |           |
|------------|-----------|----------|------------|-----------|-----------|-----------|
| NUP50      | 6.52832   | 6.42213  | 5.81224    | 5.83117   | 5.82726   | 5.50329   |
| NUP50-AS1  | 1.40949   | 1.79457  | 1.66826    | 1.94105   | 0.529601  | 0.937209  |
| NUP54      | 4.59266   | 4.79982  | 3.93022    | 4.50311   | 5.26376   | 5.89133   |
| NUP62      | 5.00896   | 4.88811  | 4.77305    | 5.04124   | 5.56957   | 5.39462   |
| NUP85      | 4.67052   | 4.68943  | 4.77285    | 5.06796   | 4.88223   | 5.0263    |
| NUP88      | 4.8888    | 5.01508  | 4.87219    | 5.3651    | 5.12358   | 5.56543   |
| NUP93      | 5.23901   | 5.23193  | 5.24011    | 5.56269   | 6.08995   | 5.87872   |
| NUP98      | 7.10515   | 7.0074   | 6.41312    | 6.73101   | 6.35348   | 6.09941   |
| NUPL1      | 6.27943   | 6.23325  | 5.86461    | 6.06014   | 6.22917   | 6.08891   |
| NUPL2      | 4.01184   | 4.01693  | 3.47647    | 3.72406   | 3.85834   | 3.97452   |
| NUPR1      | -6.68418  | -5.45651 | 2.541      | 3.00752   | 1.53448   | 1.93717   |
| NUS1       | 4.90835   | 5.04059  | 4.66683    | 4.8941    | 5.22208   | 5.38537   |
| NUS1P1     | 2.21013   | 2.42217  | 1.87057    | 2.11439   | 2.51373   | 2.82081   |
| NUSAP1     | 6.40108   | 6.37083  | 5.59495    | 5.84828   | 6.0255    | 6.2125    |
| NUTF2      | 5.06946   | 5.11335  | 5.03745    | 5.40417   | 6.25247   | 6.35076   |
| NUTF2P2    | 0.276461  | 0.547914 | 0.391009   | 0.621918  | 1.82478   | 1.729     |
| NUTM2A     | -0.483037 | -0.69698 | 1.17068    | 0.265149  | 0.444784  | -0.88417  |
| NUTM2A-AS1 | 3.2939    | 3.23624  | 2.93998    | 2.99204   | 3.13258   | 3.1293    |
| NUTM2B     | 0.374589  | 0.348176 | -0.0969247 | -0.359492 | 1.49119   | 0.662297  |
| NUTM2B-AS1 | 4.16359   | 4.20503  | 4.07184    | 3.89403   | 4.28699   | 3.93746   |
| NUTM2D     | 1.05166   | 1.15463  | 1.18641    | 1.28423   | 0.648456  | 0.682483  |
| NUTM2G     | 0.557248  | 0.331155 | 0.442195   | 0.367002  | -0.165176 | -0.848487 |
| NVL        | 3.84541   | 3.86721  | 4.00187    | 4.02671   | 3.75422   | 3.67798   |
| NXF1       | 4.74644   | 4.62328  | 4.35854    | 4.5296    | 4.632     | 4.45819   |
| NXN        | -4.11163  | -5.45651 | 3.68375    | 3.98128   | 3.78884   | 3.14191   |
| NXPE3      | 5.15558   | 5.2168   | 5.81561    | 5.98907   | 6.0303    | 5.943     |
| NXT1       | 3.50182   | 3.71083  | 2.80517    | 3.55295   | 3.20543   | 3.6398    |
| NXT2       | 1.44051   | 1.64048  | 2.41268    | 2.77992   | 2.70383   | 3.40443   |
| NYAP2      | ?         | -4.87366 | 2.57804    | 2.57769 ? |           | -5.69922  |
| OAF        | 4.42114   | 4.19357  | 3.39013    | 3.73979   | 0.479334  | 0.832509  |
| OARD1      | 2.84782   | 2.69703  | 3.1153     | 3.18119   | 3.50135   | 3.46433   |
| OAS1       | 1.6629    | 1.68185  | 2.58793    | 2.87702   | 3.67284   | 3.38604   |
| OAS2       | -6.68418  | -6.45019 | 2.94834    | 2.89118   | 3.37998   | 2.83245   |
| OAS3       | 4.37573   | 4.61195  | 4.31931    | 4.59852   | 4.71309   | 4.09903   |
| OASL       | -0.816197 | -1.07024 | 0.00643448 | 0.231137  | 1.23456   | 2.21812   |
| OAT        | 5.3086    | 5.28652  | 5.51553    | 6.182     | 5.19491   | 5.57636   |
| OAZ1       | 6.83681   | 6.64214  | 6.81751    | 7.29585   | 7.77441   | 8.24055   |
| OAZ2       | 4.33914   | 4.33319  | 4.60596    | 4.68558   | 4.69117   | 4.87823   |
| OBFC1      | 1.76038   | 1.74176  | 2.15188    | 2.53143   | 2.78678   | 3.44049   |
| OBSCN      | 2.23738   | 1.82102  | 4.21113    | 4.09293   | -2.05768  | -2.38405  |
| OBSL1      | 4.34631   | 3.83691  | 4.99534    | 4.80004   | 4.31221   | 4.16911   |
| OCEL1      | 1.14646   | 0.831845 | 0.445928   | 0.736735  | 2.09793   | 2.16367   |
| OCIAD1     | 5.49444   | 5.6086   | 4.91516    | 5.23323   | 6.08997   | 6.42029   |
| OCIAD2     | -3.37567  | -4.13839 | 0.871828   | 1.30061   | 5.63287   | 6.65247   |
| OCLN       | 0.381837  | 0.350158 | 1.08215    | 1.30377   | 3.18363   | 2.99683   |
| OCRL       | 3.7807    | 3.66257  | 4.35175    | 4.45435   | 4.87692   | 4.58906   |
| ODC1       | 5.57003   | 5.52831  | 3.72036    | 3.83661   | 6.722     | 6.91096   |
| ODCP       | 0.567789  | 0.603321 | 0.73541    | 0.266325  | 0.305574  | 0.0483059 |
| ODF2       | 4.7525    | 4.72685  | 4.43385    | 4.75141   | 4.60457   | 4.36459   |
| ODF2L      | 4.39235   | 4.42436  | 4.90393    | 4.91907   | 4.21159   | 4.0515    |
| OFD1       | 2.83527   | 2.60136  | 3.13722    | 3.04324   | 3.46727   | 3.23514   |
| OFD1P17    | -0.167846 | 0.247405 | 1.08824    | 0.750315  | 0.522879  | -0.11478  |

|          |          |          |          |           |            |            |
|----------|----------|----------|----------|-----------|------------|------------|
| OGDH     | 5.28673  | 5.16879  | 5.6694   | 5.87451   | 5.59294    | 5.41156    |
| OGFOD1   | 4.53674  | 4.70218  | 4.4986   | 5.04196   | 5.81155    | 6.16624    |
| OGFOD2   | 1.58152  | 1.35717  | 1.84801  | 1.68916   | 1.51053    | 1.55048    |
| OGFOD3   | 3.61153  | 3.52726  | 3.24065  | 3.20179   | 4.09541    | 4.05483    |
| OGFR     | 4.5677   | 4.40134  | 4.40519  | 4.66513   | 4.63488    | 4.55773    |
| OGFRL1   | 5.19503  | 5.44637  | 4.59235  | 5.14082   | 6.22307    | 5.94817    |
| OGG1     | 3.36895  | 3.23575  | 3.30077  | 3.38725   | 3.866      | 3.69925    |
| OGN      | 0.980464 | 1.33162  | 1.27595  | 0.968047  | -0.0602619 | -0.0627204 |
| OGT      | 6.49016  | 6.58171  | 6.98733  | 7.13297   | 7.61642    | 7.41625    |
| OIP5     | 2.2386   | 2.31285  | 1.64565  | 1.9684    | 2.0225     | 2.80913    |
| OIP5-AS1 | 5.86212  | 6.00367  | 5.39701  | 5.74171   | 6.13755    | 6.66857    |
| OLA1     | 5.64019  | 5.76535  | 6.12911  | 6.59644   | 6.17289    | 6.63216    |
| OLA1P1   | 3.43412  | 3.68181  | 3.93899  | 4.6136    | 3.94453    | 4.40511    |
| OLFM1    | ?        | -5.45651 | 2.98139  | 3.01788 ? |            | -5.69922   |
| OLFM2    | 1.69756  | 1.65093  | -2.37543 | -2.30078  | -1.80184   | -2.24661   |
| OLFML2A  | 4.4462   | 4.42967  | 3.20019  | 3.26838   | 2.50963    | 2.41224    |
| OLFML2B  | -1.61119 | -1.37502 | 2.93542  | 3.37498   | 5.00682    | 4.69841    |
| OLFML3   | 1.17133  | 0.988419 | 1.99142  | 1.61913   | -2.85193   | -3.38329   |
| OLMALINC | 2.17438  | 1.89913  | 1.19157  | 0.999755  | 2.53446    | 2.02802    |
| OLR1     | ?        | -4.87366 | 3.48714  | 3.74603 ? |            | -5.69922   |
| OMA1     | 3.2287   | 3.00068  | 3.23006  | 3.17658   | 3.02794    | 3.45063    |
| OMD      | 0.693311 | 0.90354  | 1.27595  | 1.02051   | -0.136604  | -0.619042  |
| OMG      | 1.95915  | 1.8318   | 2.86633  | 2.40688   | 2.34533    | 2.04819    |
| ONECUT2  | 3.95017  | 3.52726  | 3.84438  | 3.3258    | -1.20056   | -2.53597   |
| OPA1     | 5.8495   | 5.94997  | 5.87345  | 6.27838   | 6.92854    | 7.20113    |
| OPA3     | 4.20178  | 4.30947  | 3.80089  | 4.11517   | 5.28146    | 5.05981    |
| OPHN1    | 3.89431  | 4.16832  | 2.91451  | 3.11276   | 5.48179    | 5.15203    |
| OPN3     | 3.62445  | 3.07018  | 3.99234  | 3.78252   | 3.48443    | 2.94129    |
| OPRD1    | 4.7423   | 5.37163  | -2.86058 | -2.92969  | 0.147163   | 0.0747657  |
| OPTN     | 3.97157  | 4.11363  | 4.35369  | 4.94102   | 3.92464    | 4.42256    |
| OR7E126P | 0.460879 | 0.272489 | 0.987183 | 0.383121  | -0.705893  | -2.15312   |
| OR7E38P  | 1.92658  | 1.85193  | 2.04476  | 2.23097   | 2.80115    | 2.96898    |
| ORAI1    | 2.88589  | 2.60056  | 2.23435  | 2.3588    | 2.26452    | 2.58332    |
| ORAI2    | 4.83247  | 4.60017  | 4.81085  | 5.04688   | 5.19428    | 5.02267    |
| ORAI3    | 1.64327  | 1.19057  | 3.48027  | 3.41938   | 2.74267    | 3.20879    |
| ORAOV1   | 3.22114  | 3.232    | 3.01123  | 3.28808   | 2.84827    | 2.36508    |
| ORC1     | 4.76446  | 4.82024  | 4.4117   | 4.75769   | 4.37244    | 4.09095    |
| ORC2     | 4.37552  | 4.48857  | 3.87025  | 4.04074   | 4.9839     | 5.10207    |
| ORC3     | 4.54051  | 4.78564  | 3.86632  | 4.18121   | 4.41248    | 5.25543    |
| ORC4     | 4.48429  | 4.45237  | 4.11286  | 4.18082   | 4.50628    | 5.13681    |
| ORC5     | 3.7624   | 3.7319   | 3.23854  | 3.50772   | 3.62278    | 4.0178     |
| ORC6     | 3.68893  | 3.60593  | 4.02227  | 4.23324   | 4.58048    | 4.53526    |
| ORMDL1   | 4.58343  | 4.52867  | 4.29625  | 4.48922   | 5.7188     | 5.90475    |
| ORMDL2   | 3.84037  | 3.86419  | 3.64271  | 4.0007    | 3.51268    | 3.97223    |
| ORMDL3   | 3.79578  | 3.73805  | 4.38538  | 4.53412   | 4.29679    | 4.35262    |
| OS9      | 5.92594  | 5.93989  | 6.62262  | 6.8966    | 6.15884    | 6.05358    |
| OSBP     | 4.52973  | 4.58496  | 4.99015  | 5.30954   | 4.7607     | 4.83824    |
| OSBP2    | 1.6585   | 2.08407  | -2.09546 | -1.58485  | -1.80184   | -3.12051   |
| OSBPL10  | 6.35568  | 6.23758  | 3.0308   | 3.16963   | 6.57419    | 6.19679    |
| OSBPL11  | 3.49075  | 3.62727  | 3.53757  | 3.77839   | 3.80729    | 3.95149    |
| OSBPL1A  | 3.67135  | 3.77782  | 3.59192  | 3.72872   | 2.75292    | 2.52212    |
| OSBPL2   | 4.86602  | 4.69071  | 4.71023  | 4.94915   | 4.88897    | 4.47816    |

|               |          |           |            |            |          |           |
|---------------|----------|-----------|------------|------------|----------|-----------|
| OSBPL3        | 5.70632  | 6.02097   | 4.01246    | 4.2399     | 4.78574  | 4.64533   |
| OSBPL5        | 2.99615  | 2.50871   | 3.25111    | 3.35674    | -1.10542 | -1.38442  |
| OSBPL6        | 3.11951  | 3.28367   | 1.5714     | 1.68562    | 4.2968   | 4.23286   |
| OSBPL7        | 2.28393  | 2.33483   | 2.75018    | 2.84246    | 2.67732  | 2.50762   |
| OSBPL8        | 5.73866  | 5.79921   | 5.5896     | 5.80068    | 5.63978  | 5.65795   |
| OSBPL9        | 5.29626  | 5.23103   | 6.15222    | 6.32197    | 5.74585  | 5.70464   |
| OSCP1         | 0.693311 | 0.0450795 | 0.849967   | 1.32585    | 0.939663 | 1.41227   |
| OSER1         | 4.58978  | 4.61994   | 4.45217    | 4.9773     | 4.48498  | 5.10221   |
| OSER1-AS1     | 0.631914 | 0.467978  | 0.893354   | 1.39106    | 0.246688 | 0.33778   |
| OSGEP         | 3.22143  | 3.33563   | 2.35953    | 2.80011    | 3.16361  | 3.10281   |
| OSGEPL1       | 2.18151  | 2.21532   | 1.88213    | 2.17999    | 2.64119  | 3.14321   |
| OSGIN1        | 0.586404 | 0.419895  | 3.73236    | 4.03963    | 1.06084  | 1.1637    |
| OSGIN2        | 3.92662  | 4.10321   | 4.10648    | 4.69529    | 4.54365  | 4.69521   |
| OSMR          | 5.92235  | 5.59941   | 7.61951    | 7.74073    | 6.4785   | 6.16599   |
| OSR1          | 1.06916  | 0.635262  | 1.69303    | 1.64609    | 0.282309 | -0.95156  |
| OSR2          | -1.45077 | -0.907998 | -0.0748589 | 0.158078   | 1.04018  | 0.847941  |
| OST4          | 4.57117  | 4.6639    | 3.61173    | 3.99808    | 5.42184  | 6.02132   |
| OSTC          | 4.98869  | 4.95021   | 5.43623    | 5.68112    | 4.85041  | 5.72319   |
| OSTF1         | 1.70183  | 1.74664   | 1.86635    | 2.46104    | 2.11778  | 2.78915   |
| OSTM1         | 4.93893  | 4.93373   | 5.13895    | 5.42253    | 7.53161  | 7.99435   |
| OTOGL         | -3.11289 | -2.76144  | -5.1783    | -2.78591   | 2.88273  | 3.0877    |
| OTUB1         | 5.0087   | 4.98681   | 4.29928    | 4.74057    | 4.61696  | 5.03895   |
| OTUB2         | 2.50766  | 2.63108   | 0.874396   | 0.969668   | 1.059    | 0.767273  |
| OTUD1         | 1.64525  | 1.50873   | 1.08332    | 1.57069    | -2.65941 | -2.70579  |
| OTUD3         | 3.95197  | 3.85456   | 3.9889     | 3.96531    | 3.88658  | 3.00065   |
| OTUD4         | 5.56181  | 5.6142    | 5.08375    | 5.28071    | 5.41122  | 5.06622   |
| OTUD4P1       | 2.08384  | 2.20765   | 1.94319    | 2.12223    | 1.84426  | 1.60322   |
| OTUD5         | 4.16588  | 4.14263   | 4.04047    | 4.48923    | 3.8798   | 3.91166   |
| OTUD6B        | 3.65847  | 3.73682   | 3.51344    | 3.75536    | 4.38543  | 4.21958   |
| OTUD6B-AS1    | 3.16201  | 3.05286   | 3.69146    | 3.8145     | 3.86521  | 4.11505   |
| OTUD7B        | 5.53811  | 5.44442   | 4.69605    | 4.80779    | 5.16464  | 4.81095   |
| OTULIN        | 5.22979  | 5.21487   | 5.21253    | 5.35775    | 5.35091  | 5.11106   |
| OVCA2         | 3.08444  | 2.92366   | 3.25655    | 3.76051    | 3.856    | 4.53917   |
| OXA1L         | 4.67159  | 4.55673   | 4.0477     | 4.26403    | 5.04098  | 5.07382   |
| OXCT1         | 4.27243  | 4.39901   | 3.14291    | 3.57592    | 4.42448  | 4.7568    |
| OXLD1         | 3.55177  | 3.31044   | 2.61255    | 3.00492    | 3.43888  | 3.89333   |
| OXNAD1        | 3.9193   | 3.96027   | 3.48003    | 3.69207    | 3.82954  | 4.11506   |
| OXR1          | 4.53093  | 4.77276   | 3.4531     | 3.79398    | 4.10206  | 4.75818   |
| OXSM          | 2.54115  | 2.61621   | 1.61135    | 2.08102    | 2.75795  | 3.60843   |
| OXSR1         | 5.83205  | 5.71425   | 4.64619    | 5.07852    | 6.29388  | 6.17363   |
| OXTR          | 0.743937 | 0.90354   | -0.325375  | -0.0642959 | 0.847548 | 0.68568   |
| P2RX4         | 1.69756  | 1.692     | 2.51346    | 2.81896    | 1.90577  | 2.14505   |
| P2RX5-TAX1BP3 | 0.430039 | 0.367427  | 0.483075   | 0.155827   | -0.5694  | -0.49705  |
| P2RX6         | -1.41331 | -1.2146   | 2.18282    | 2.48628    | -2.572   | -2.38405  |
| P2RX7         | 0.768595 | 0.736899  | 1.81086    | 3.0611     | -0.43131 | -0.536593 |
| P2RY1         | 3.01173  | 3.33481 ? | ?          |            | 1.77017  | 1.63317   |
| P2RY11        | 1.48976  | 1.13154   | -0.223722  | -0.0972858 | 1.97841  | 1.29276   |
| P3H1          | 5.74359  | 5.33845   | 6.58922    | 6.73526    | 5.01786  | 4.50517   |
| P3H2          | 4.88728  | 4.77376   | 6.60068    | 6.81411    | 5.43274  | 4.66723   |
| P3H3          | 4.78021  | 4.78387   | 4.17182    | 4.45055    | 4.21236  | 4.63868   |
| P3H4          | 4.78273  | 4.59307   | 4.35175    | 4.46954    | 3.4298   | 3.59224   |
| P4HA1         | 5.49137  | 5.33968   | 5.66706    | 5.96599    | 6.80898  | 6.49661   |

|             |           |           |           |            |          |            |
|-------------|-----------|-----------|-----------|------------|----------|------------|
| P4HA2       | 5.22387   | 5.26845   | 5.86427   | 6.11912    | 6.07573  | 5.38794    |
| P4HB        | 9.04242   | 8.89895   | 8.64582   | 8.94931    | 8.83336  | 8.72403    |
| P4HTM       | 3.62036   | 3.36345   | 3.07622   | 3.32126    | 3.64689  | 3.36681    |
| PA2G4       | 6.79852   | 6.81936   | 5.27919   | 5.69875    | 6.24642  | 6.32577    |
| PA2G4P1     | 2.00587   | 1.86289   | 0.76612   | 0.633682   | 1.28125  | 1.17556    |
| PA2G4P2     | 2.24182   | 2.38315   | 0.755409  | 1.23445    | 1.72246  | 1.57492    |
| PA2G4P4     | 4.46842   | 4.61054   | 2.98361   | 3.26232    | 3.69072  | 3.81041    |
| PAAF1       | 3.15423   | 3.15003   | 3.17623   | 3.47237    | 2.77433  | 2.68561    |
| PABPC1      | 7.2029    | 6.92348   | 7.46325   | 7.31049    | 8.04698  | 7.87008    |
| PABPC1L     | 3.457     | 3.51872   | 3.42565   | 3.37298    | 3.38272  | 2.47321    |
| PABPC1P3    | -0.419098 | -0.474893 | 0.346543  | 0.132208   | 0.502351 | 0.0136695  |
| PABPC1P4    | 1.94995   | 1.65755   | 2.19254   | 1.9712     | 2.76623  | 2.37091    |
| PABPC3      | 3.42394   | 3.20796   | 3.75993   | 3.62563    | 4.17913  | 3.99164    |
| PABPC4      | 5.95025   | 5.80152   | 4.973     | 5.0314     | 5.92614  | 5.61256    |
| PABPN1      | 5.06402   | 4.78989   | 4.1398    | 4.22811    | 5.49515  | 5.13752    |
| PACRGL      | 2.35622   | 2.53998   | 1.83887   | 2.02562    | 2.77849  | 3.14816    |
| PACS1       | 3.74696   | 3.62594   | 3.88525   | 3.83368    | 3.19612  | 3.25619    |
| PACS2       | 3.75213   | 3.50581   | 2.5995    | 2.49481    | 3.22843  | 3.08771    |
| PACSIN2     | 5.09822   | 5.00987   | 5.26666   | 5.62798    | 4.99747  | 4.66614    |
| PACSIN3     | 3.92846   | 3.70582   | 3.03807   | 3.4049     | 3.52952  | 3.35668    |
| PADI3       | -2.9975   | -3.29152  | 1.05494   | 1.74918    | 0.983605 | 3.55068    |
| PAF1        | 4.50609   | 4.51586   | 4.21308   | 4.54491    | 5.21312  | 4.80897    |
| PAFAH1B1    | 5.98678   | 6.07068   | 6.29763   | 6.56195    | 6.93643  | 7.01862    |
| PAFAH1B2    | 5.99634   | 6.53535   | 5.803     | 6.66369    | 6.30601  | 6.84089    |
| PAFAH1B3    | 2.71002   | 2.67867   | 2.28086   | 2.62178    | 3.25885  | 3.83555    |
| PAFAH2      | 3.15268   | 3.12962   | 2.72338   | 3.17426    | 3.50334  | 3.8188     |
| PAG1        | 3.34531   | 3.55675   | 4.29221   | 4.60111    | 4.1694   | 3.76089    |
| PAGE2       | 3.92296   | 3.80641   | -6.17309  | -6.09892 ? | ?        |            |
| PAGE5       | 4.04639   | 3.98792   | -3.59683  | -2.40763   | -6.64581 | -5.69922   |
| PAGR1       | 4.00467   | 3.92399   | 3.41263   | 3.5496     | 3.46239  | 3.42911    |
| PAICS       | 6.95471   | 7.00175   | 6.37316   | 6.76832    | 9.03045  | 9.23098    |
| PAICSP4     | 2.80367   | 3.12075   | 2.40598   | 2.80646    | 4.84032  | 4.93585    |
| PAIP1       | 3.77374   | 3.78624   | 3.76866   | 4.05731    | 4.39462  | 4.76701    |
| PAIP2       | 5.23647   | 5.1426    | 5.27585   | 5.53862    | 5.82683  | 6.21549    |
| PAK1        | 4.84857   | 4.96547   | 3.9367    | 4.22656    | 3.97509  | 4.1969     |
| PAK1IP1     | 3.84588   | 3.86919   | 2.80517   | 3.25531    | 4.82802  | 5.31495    |
| PAK2        | 5.32479   | 5.20944   | 5.53585   | 5.73229    | 6.10417  | 6.06265    |
| PAK3        | -0.223192 | 0.076436  | -0.825729 | -0.353769  | 3.62971  | 4.50273    |
| PAK4        | 2.0823    | 2.041     | 2.693     | 2.97599    | 3.06931  | 2.96572    |
| PALB2       | 3.89056   | 4.01086   | 3.9914    | 4.45531    | 3.53568  | 3.6856     |
| PALLD       | 4.62236   | 4.58334   | 5.89094   | 6.05647    | 6.44525  | 6.59549    |
| PALM2       | 2.06204   | 2.49567   | 1.05938   | 0.385674   | 0.746356 | -0.0369639 |
| PALM2-AKAP2 | 4.23388   | 3.94279   | 1.83921   | 2.86413    | 3.24786  | 2.91817    |
| PALM3       | 0.399051  | 0.592522  | 0.849967  | 0.935626   | -2.75246 | -2.70579   |
| PAM         | 6.97478   | 7.10832   | 6.34028   | 6.35853    | 6.92828  | 6.72765    |
| PAM16       | 1.28963   | 1.38268   | 1.14718   | 1.63263    | 1.37315  | 2.43506    |
| PAMR1       | -5.69162  | -6.45019  | 4.48713   | 4.53952    | -3.19956 | -4.70296   |
| PAN2        | 3.7114    | 3.17921   | 4.36722   | 4.06735    | 3.24207  | 2.53647    |
| PAN3        | 4.2988    | 4.15278   | 4.38252   | 4.25858    | 4.04358  | 3.48064    |
| PANDAR      | 0.449862  | 0.693712  | 0.762221  | 1.39889    | 1.67671  | 1.75313    |
| PANK1       | 2.46332   | 2.39204   | 1.95937   | 2.06609    | 2.57572  | 2.5173     |
| PANK2       | 4.73764   | 4.65305   | 5.20233   | 5.40341    | 4.43311  | 4.42315    |

|            |           |            |           |           |           |           |
|------------|-----------|------------|-----------|-----------|-----------|-----------|
| PANK3      | 6.5242    | 6.79669    | 6.43389   | 6.8864    | 7.41718   | 7.56818   |
| PANK4      | 2.58864   | 2.40753    | 2.77068   | 2.94375   | 3.16465   | 2.92629   |
| PANX1      | 4.26956   | 4.3453     | 4.63506   | 4.96733   | 4.54788   | 4.80996   |
| PANX2      | -1.45077  | -1.46246   | 1.06446   | 0.845438  | 0.86332   | 0.878317  |
| PAPD4      | 4.35144   | 4.53574    | 5.0926    | 5.20234   | 5.30185   | 5.38405   |
| PAPD5      | 3.58747   | 3.82718    | 3.88121   | 4.01658   | 4.76226   | 4.7164    |
| PAPD7      | 4.78322   | 4.63912    | 4.76776   | 4.661     | 4.825     | 4.11506   |
| PAPOLA     | 6.53871   | 6.4758     | 5.91549   | 6.04567   | 6.66622   | 6.51094   |
| PAPOLG     | 3.66176   | 3.77437    | 3.48358   | 3.51689   | 3.51086   | 3.6107    |
| PAPPA      | 5.79913   | 5.84633    | 2.96999   | 2.78761   | 5.81177   | 5.55421   |
| PAPSS1     | 4.97909   | 5.06071    | 5.00196   | 5.27541   | 4.78418   | 4.74552   |
| PAPSS2     | 4.38242   | 3.71333    | 4.56719   | 5.1444    | 3.15668   | 3.27056   |
| PAQR3      | 4.03802   | 4.68742    | 3.9053    | 4.20901   | 3.85846   | 4.59104   |
| PAQR4      | 4.00287   | 3.88132    | 3.23576   | 3.44709   | 2.76035   | 2.60516   |
| PAQR5      | 1.59558   | 1.58665    | -0.240653 | -0.381793 | -1.15445  | -1.18284  |
| PAQR7      | 3.91053   | 3.91291    | 2.97926   | 3.16734   | 3.4092    | 3.18194   |
| PAQR8      | 4.18125   | 4.36606    | 4.04288   | 4.42935   | 4.01564   | 4.24456   |
| PARD3      | 5.42503   | 5.37792    | 2.01126   | 1.98923   | 4.88415   | 4.54121   |
| PARD3B     | 2.35078   | 2.45603    | 2.49949   | 2.28779   | 2.95991   | 2.77711   |
| PARD6A     | -0.159773 | -0.27286   | -3.37468  | -2.10822  | 2.1726    | 2.49297   |
| PARD6B     | 4.14326   | 3.79454    | 4.82349   | 4.94033   | 3.75332   | 3.10386   |
| PARD6G     | 3.30515   | 3.23085    | 1.1304    | 0.893937  | 0.282309  | -0.283387 |
| PARD6G-AS1 | 1.33439   | 1.614      | 0.371169  | 0.19507   | -0.530833 | -0.619042 |
| PARG       | 4.60194   | 4.58561    | 4.08801   | 4.20559   | 4.80327   | 4.7384    |
| PARGP1     | 2.79246   | 2.71424    | 2.55945   | 2.22999   | 2.68442   | 2.75611   |
| PARK7      | 5.60869   | 5.57435    | 5.19369   | 5.54938   | 6.0906    | 6.61548   |
| PARL       | 3.55893   | 3.56641    | 3.84852   | 4.25082   | 4.44634   | 4.9342    |
| PARM1      | 4.05581   | 3.48262    | 1.93024   | 0.761609  | -5.07051  | -5.69922  |
| PARN       | 4.18049   | 4.04097    | 3.97002   | 4.15209   | 3.84847   | 3.92081   |
| PARP1      | 6.98231   | 6.90914    | 6.53232   | 6.77741   | 6.77624   | 6.68332   |
| PARP10     | 1.50553   | 1.35098    | 3.55118   | 3.65604   | 3.30403   | 3.38605   |
| PARP11     | 1.08233   | 0.746683   | 1.73537   | 1.69856   | -1.75295  | -2.70579  |
| PARP12     | 3.6943    | 3.88809    | 3.84714   | 4.09696   | 4.30978   | 4.31287   |
| PARP14     | 5.15889   | 5.37278    | 7.10757   | 7.09527   | 8.14812   | 8.21465   |
| PARP16     | 1.47089   | 1.23069    | 2.02107   | 2.17196   | 2.26155   | 2.16367   |
| PARP1P1    | 2.38381   | 2.47869    | 1.64004   | 1.89916   | 2.07271   | 1.46813   |
| PARP2      | 3.85647   | 3.87254    | 2.75312   | 3.01788   | 3.71146   | 3.42514   |
| PARP3      | 2.51282   | 2.38892    | 2.84162   | 3.21536   | 1.60651   | 2.08121   |
| PARP4      | 5.64939   | 5.94446    | 5.8357    | 6.22155   | 5.41783   | 5.80601   |
| PARP6      | 4.25438   | 4.20869    | 4.53928   | 4.59593   | 4.54603   | 4.08607   |
| PARP8      | 3.69674   | 3.73437    | 3.28612   | 3.19724   | 2.47208   | 2.20019   |
| PARP9      | 2.79459   | 2.97294    | 3.93927   | 4.31531   | 5.96178   | 6.3092    |
| PARPBP     | 4.7811    | 4.87641    | 3.57396   | 3.78778   | 4.01568   | 4.49174   |
| PARS2      | 1.80874   | 2.02903    | 2.11571   | 2.59509   | 2.25259   | 2.33222   |
| PART1      | -0.228209 | -0.0918512 | 0.780612  | 1.08275   | -1.59203  | -1.4238   |
| PARVA      | 4.1211    | 3.96969    | 5.13162   | 5.32057   | 4.12922   | 4.19113   |
| PARVB      | 1.68897   | 1.63505    | 2.96114   | 3.45913   | -2.95876  | -2.38405  |
| PASK       | 4.09259   | 3.79296    | 3.63349   | 3.58148   | 3.14621   | 2.59737   |
| PATL1      | 3.53334   | 3.51586    | 3.76776   | 3.9586    | 3.33917   | 3.21215   |
| PATZ1      | 4.1589    | 4.05875    | 3.00383   | 3.16264   | 3.26895   | 3.46822   |
| PAWR       | 4.81377   | 5.03749    | 4.59125   | 4.78977   | 5.56239   | 5.36541   |
| PAX3       | -0.917461 | -1.37502   | 2.27592   | 2.40294   | -3.6585   | -2.70579  |



|            |          |            |           |            |            |            |
|------------|----------|------------|-----------|------------|------------|------------|
| PAX6       | -0.69886 | -0.629746  | 1.45314   | 1.39901    | 2.47925    | 2.18812    |
| PAX8       | 3.37608  | 3.77562    | 0.163035  | 1.10341    | 1.33768    | 2.13214    |
| PAX8-AS1   | 5.45369  | 6.06234    | 0.42219   | 1.60983    | 0.664201   | 1.43766    |
| PAX9       | -0.97084 | -1.20847   | 0.888204  | 0.273098   | 0.979616   | 0.483674   |
| PAXBP1     | 5.14326  | 5.028      | 5.77791   | 5.69489    | 4.60647    | 4.30031    |
| PAXBP1-AS1 | 1.20183  | 1.00482    | 2.1019    | 1.95189    | 0.479334   | 0.100762   |
| PAXIP1     | 4.81979  | 4.79368    | 4.25994   | 4.29196    | 3.85218    | 3.23536    |
| PAXIP1-AS1 | 1.76038  | 1.79928    | 1.5847    | 1.77384    | 0.990802   | 0.863209   |
| PAXIP1-AS2 | 1.6956   | 1.71937    | 2.18059   | 2.2225     | 1.39101    | 1.12815    |
| PBDC1      | 2.90083  | 2.93804    | 1.99142   | 2.53864    | 3.41382    | 3.54122    |
| PBK        | 5.33846  | 5.3994     | 4.56801   | 4.849      | 4.5673     | 4.93353    |
| PBLD       | 0.195852 | -0.0533185 | 1.88259   | 1.59857    | 1.8711     | 1.38079    |
| PBRM1      | 6.20535  | 6.26519    | 5.64634   | 5.78933    | 6.27805    | 6.18079    |
| PBX1       | 2.9138   | 2.65091    | 3.76485   | 3.33412    | 6.14198    | 5.90337    |
| PBX2       | 4.34237  | 3.94063    | 3.99112   | 3.85707    | 4.3407     | 3.71441    |
| PBX2P1     | 1.62867  | 1.57919    | 1.46197   | 1.2304     | 1.64145    | 1.05415    |
| PBX3       | 3.25802  | 3.3998     | 1.98141   | 2.13437    | 3.38818    | 3.60163    |
| PBXIP1     | 5.17092  | 4.66385    | 5.34538   | 5.46768    | 5.5215     | 5.63254    |
| PC         | 4.33168  | 4.32759    | 4.30268   | 4.78223    | 3.0344     | 3.20168    |
| PCBD1      | 1.92665  | 2.23066    | 1.77651   | 2.39898    | 3.32268    | 3.45568    |
| PCBD2      | 2.36879  | 2.6728     | 2.76067   | 2.86795    | 2.3319     | 2.22285    |
| PCBP1      | 5.24122  | 5.11919    | 4.46127   | 4.5359     | 5.25529    | 5.1964     |
| PCBP1-AS1  | 2.97294  | 2.75448    | 2.69896   | 2.41871    | 2.55568    | 2.0483     |
| PCBP2      | 6.394    | 6.23736    | 6.29063   | 6.2137     | 5.95272    | 5.83624    |
| PCBP3      | -1.52875 | -1.93875   | 1.98643   | 2.33827 ?  | ?          |            |
| PCBP3-OT1  | -1.8406  | -2.76144   | 1.61741   | 1.65276    | -6.64581 ? |            |
| PCBP4      | 4.64576  | 4.2254     | 3.0308    | 3.21085    | 3.60881    | 3.60389    |
| PCCA       | 2.30153  | 2.24672    | 3.5089    | 3.48178    | 2.42678    | 2.57321    |
| PCCB       | 3.73049  | 3.69185    | 3.0917    | 3.53043    | 3.54472    | 3.83326    |
| PCDH1      | 5.72247  | 4.83865    | 0.225978  | 1.12005    | -3.33694   | -2.53597   |
| PCDH10     | 3.16201  | 3.04495    | -0.161006 | -0.585061  | 4.5295     | 4.00409    |
| PCDH17     | 3.6172   | 3.43349 ?  | ?         |            | 2.60179    | 2.68131    |
| PCDH18     | 1.67164  | 1.70711    | 7.04943   | 6.36465    | 3.59235    | 3.84788    |
| PCDH20     | -1.41331 | -2.37465   | 0.120378  | 0.902467   | 5.44133    | 6.60417    |
| PCDH7      | 2.39633  | 2.59245    | -6.17309  | -3.78492   | -0.660096  | -0.247123  |
| PCDH9      | 5.68566  | 5.37239    | -1.37581  | -1.64896   | 5.5793     | 5.80007    |
| PCDHA10    | 3.33907  | 3.2967     | -4.29892  | -3.52234   | -3.63244 ? |            |
| PCDHA11    | 2.17753  | 2.35188    | -5.1782   | -6.08452   | -5.65295   | -4.39837   |
| PCDHA2     | 2.12548  | 1.86501    | -4.05396  | -3.51044 ? |            | -13.2868   |
| PCDHA3     | 3.87141  | 3.73113    | -2.91128  | -4.52056   | -4.33541   | -4.69257   |
| PCDHA4     | 3.30685  | 3.24344    | -3.37468  | -3.73046   | -3.85089   | -4.68098   |
| PCDHA5     | 2.52977  | 2.40842    | -5.1783   | -3.88131   | -6.1458 ?  |            |
| PCDHA6     | 3.24508  | 3.15347    | -3.85951  | -6.09883   | -5.07051   | -4.69757   |
| PCDHA7     | 3.14545  | 2.87718    | -5.84661  | -5.59246   | -3.51959   | -4.69678   |
| PCDHAC1    | 2.56396  | 2.41648    | -5.58868  | -4.10635   | -5.08692 ? |            |
| PCDHAC2    | 2.33799  | 2.43409    | -3.47952  | -2.93671 ? | ?          |            |
| PCDHB10    | 1.91381  | 1.91447    | 0.722536  | 0.288359   | 0.248814   | -0.0933326 |
| PCDHB11    | 1.84535  | 1.70315    | 0.597917  | 0.335758   | -2.07475   | -2.70579   |
| PCDHB12    | 2.47982  | 2.36589    | 0.893354  | 0.430424   | -3.15591   | -4.11926   |
| PCDHB13    | 2.09323  | 1.86743    | 1.29534   | 0.799145   | -3.20887   | -3.86617   |
| PCDHB14    | 1.44953  | 1.4024     | 2.55303   | 2.14901    | 1.56854    | 0.978518   |
| PCDHB15    | 1.80505  | 2.07603    | 0.238946  | -0.383375  | -2.41163   | -2.74991   |

|          |           |            |           |            |            |            |
|----------|-----------|------------|-----------|------------|------------|------------|
| PCDHB16  | 4.07403   | 3.81103    | 2.98269   | 2.25817    | -0.0637725 | -0.982845  |
| PCDHB17P | 2.21002   | 1.98911    | -1.91719  | -2.93571 ? | ?          |            |
| PCDHB2   | 3.96062   | 3.82964    | 1.84539   | 1.01662    | -0.34409   | -1.16796   |
| PCDHB5   | 4.35565   | 3.96456    | -3.85951  | -2.64851   | -5.61326   | -4.64778   |
| PCDHB6   | 3.25334   | 3.34251    | -4.17617  | -4.10635   | -5.64523   | -5.69922   |
| PCDHB7   | 2.97426   | 2.64596    | -0.757028 | -1.09739   | -0.905167  | -0.899103  |
| PCDHB8   | 4.08672   | 3.95603    | -0.653591 | -1.58116   | -4.53431   | -5.19176   |
| PCDHB9   | 2.05898   | 2.03798    | 1.15374   | 0.73508    | -0.273545  | -0.832306  |
| PCDHGA1  | 0.726212  | 0.159048   | 0.232771  | -0.336116  | 0.636924   | -0.0482019 |
| PCDHGA10 | 2.59249   | 2.48314    | 2.64653   | 2.21425    | 1.12611    | 0.27978    |
| PCDHGA11 | 0.836215  | 0.81619    | 0.817394  | 0.578533   | 0.387914   | -0.725172  |
| PCDHGA4  | 1.26354   | 0.982284   | 0.983649  | 0.929632   | 1.38286    | 0.34276    |
| PCDHGA5  | 1.2093    | 0.436897   | 1.10883   | 0.585174   | 1.55757    | 0.545148   |
| PCDHGA6  | 1.51095   | 1.29602    | 1.98902   | 1.51905    | 2.20774    | 1.15867    |
| PCDHGA8  | 0.452627  | 0.72396    | 0.446584  | -0.0945798 | 0.894457   | -0.0101634 |
| PCDHGA9  | 0.667765  | 0.493145   | 2.68674   | 2.49812    | 1.87896    | 1.09828    |
| PCDHGB1  | 0.844611  | 0.525748   | 0.731661  | -0.0818581 | 1.8729     | 0.672652   |
| PCDHGB2  | 2.76618   | 2.829      | 2.19585   | 2.04029    | 2.85066    | 2.74209    |
| PCDHGB3  | 1.37151   | 0.987066   | 1.76438   | 1.0127     | 1.92409    | 1.00398    |
| PCDHGB4  | 0.593354  | 0.108625   | 0.239105  | -0.0954319 | 0.849991   | -0.019824  |
| PCDHGB6  | 0.75628   | 0.715507   | 0.713678  | 0.417607   | 0.749208   | -0.206424  |
| PCDHGB7  | 2.65743   | 2.59661    | 1.6592    | 1.28751    | 0.836457   | 0.235703   |
| PCDHGC3  | 6.9489    | 6.59184    | 6.40114   | 6.28523    | 6.25214    | 5.94788    |
| PCDHGC4  | 2.46364   | 1.81024    | 1.62681   | 1.16356    | 1.2387     | 0.362734   |
| PCDHGC5  | 2.38316   | 1.57768    | 1.64771   | 1.13205    | 1.69439    | 0.37709    |
| PCED1A   | 2.85935   | 2.50583    | 3.75017   | 3.76615    | 1.79093    | 1.46325    |
| PCED1B   | -0.591601 | -0.622086  | -0.254699 | 0.0321291  | 0.664192   | 0.662515   |
| PCF11    | 5.27498   | 5.18394    | 5.49287   | 5.57498    | 5.28887    | 5.18462    |
| PCGF1    | 2.36163   | 2.30535    | 1.83331   | 2.29584    | 2.26748    | 2.45317    |
| PCGF2    | 2.51118   | 2.37236    | 2.28502   | 2.02601    | 2.01167    | 1.84661    |
| PCGF3    | 5.00091   | 4.78024    | 5.23063   | 5.2673     | 5.85042    | 5.17056    |
| PCGF5    | 4.77715   | 4.72265    | 4.09143   | 4.63179    | 5.37004    | 5.23283    |
| PCGF6    | 2.5636    | 2.51482    | 2.28305   | 2.51108    | 2.79131    | 2.82456    |
| PCGF7P   | 0.396466  | -0.0386523 | -0.270293 | 0.310631   | 0.244351   | 0.294018   |
| PCID2    | 4.52203   | 4.41673    | 4.66234   | 4.95834    | 4.52918    | 4.32636    |
| PCIF1    | 3.26815   | 3.11647    | 2.89063   | 2.98921    | 2.88273    | 3.09742    |
| PCK2     | 2.19878   | 2.30535    | 2.5273    | 3.01271    | 2.04015    | 2.18205    |
| PCLO     | 4.68514   | 4.75329    | -0.300715 | -0.154483  | -5.65305   | -5.69922   |
| PCM1     | 6.51642   | 6.60003    | 6.42242   | 6.61781    | 6.09895    | 6.25435    |
| PCMT1    | 4.6462    | 4.87127    | 4.90433   | 5.32191    | 5.53147    | 6.01601    |
| PCMTD1   | 4.61491   | 4.80745    | 4.58958   | 4.73271    | 3.96173    | 4.49784    |
| PCMTD2   | 5.43534   | 5.49532    | 4.65173   | 4.52143    | 4.97357    | 4.97803    |
| PCNA     | 6.61979   | 6.7247     | 6.48225   | 6.8674     | 6.42916    | 6.97003    |
| PCNP     | 5.80111   | 5.9012     | 5.52493   | 5.76559    | 5.61999    | 5.51151    |
| PCNPP5   | 2.03462   | 2.17158    | 1.61434   | 2.01272    | 1.73886    | 1.94095    |
| PCNT     | 5.16203   | 5.0484     | 6.28764   | 6.36581    | 4.85737    | 4.50274    |
| PCNX     | 6.58182   | 6.43122    | 6.07945   | 6.08716    | 6.38234    | 6.26911    |
| PCNXL2   | 4.91069   | 5.16904    | 4.88456   | 5.13916    | 4.33971    | 4.20396    |
| PCNXL3   | 5.1805    | 4.85342    | 4.76774   | 4.64522    | 4.54059    | 4.58905    |
| PCNXL4   | 6.03142   | 6.10597    | 5.23542   | 5.46314    | 5.4446     | 5.67584    |
| PCOLCE   | 6.089     | 5.74545    | 5.76889   | 5.61883    | -1.37455   | -1.38442   |
| PCOLCE2  | 1.12115   | 1.08411    | 0.416483  | 0.491176   | 1.77851    | 2.56008    |

|          |           |             |           |           |          |          |
|----------|-----------|-------------|-----------|-----------|----------|----------|
| PCSK1    | 0.0425183 | -0.681268   | 1.81086   | 0.833756  | 1.17894  | 2.0681   |
| PCSK5    | 4.53032   | 4.98784     | 0.416483  | 1.23107   | -2.41163 | -2.12114 |
| PCSK7    | 4.99192   | 5.0131      | 5.32085   | 5.45442   | 5.36389  | 4.97875  |
| PCTP     | 3.4532    | 3.4928      | 3.6206    | 3.70174   | 2.90765  | 3.2677   |
| PCYOX1   | 6.10627   | 6.05085     | 6.01184   | 6.19891   | 6.07271  | 5.78514  |
| PCYOX1L  | 3.21081   | 3.17921     | 4.02104   | 4.24872   | 2.65485  | 3.04483  |
| PCYT1A   | 5.21921   | 5.39782     | 5.93561   | 6.27653   | 6.85967  | 7.02626  |
| PCYT1B   | 0.44057   | 0.71714     | 0.945825  | 0.999755  | 1.55404  | 0.951558 |
| PCYT2    | 3.98736   | 3.64534     | 4.03902   | 4.65136   | 4.79441  | 5.35772  |
| PDAP1    | 5.85751   | 5.76786     | 4.99147   | 5.35877   | 6.34048  | 6.27473  |
| PDCD10   | 3.94206   | 3.93589     | 4.0926    | 4.46102   | 4.59825  | 5.11426  |
| PDCD11   | 6.34564   | 6.37279     | 5.44081   | 5.64522   | 6.65315  | 6.36507  |
| PDCD1LG2 | -0.207073 | -0.00328298 | 0.747284  | 1.45345   | 2.32839  | 3.22107  |
| PDCD2    | 4.52488   | 4.64485     | 3.81635   | 4.12469   | 5.74339  | 6.38991  |
| PDCD2L   | 1.3937    | 1.58158     | 0.623811  | 1.43037   | 2.00853  | 2.72792  |
| PDCD4    | 3.82568   | 4.24911     | 3.87165   | 4.11288   | 3.55915  | 4.17808  |
| PDCD5    | 4.44706   | 4.37207     | 4.03585   | 4.51479   | 4.62716  | 5.06371  |
| PDCD5P1  | 0.653234  | 0.824222    | 0.201069  | 0.949565  | 1.05669  | 1.19953  |
| PDCD6    | 5.56356   | 5.53941     | 5.06039   | 5.36595   | 5.96984  | 5.97874  |
| PDCD6IP  | 5.99569   | 6.10278     | 5.73937   | 6.02929   | 6.31119  | 6.30391  |
| PDCD7    | 3.42892   | 3.37479     | 3.12936   | 3.36488   | 3.32553  | 3.24749  |
| PDCL     | 3.66176   | 3.81676     | 3.36915   | 3.68071   | 3.88272  | 4.18354  |
| PDCL3    | 2.45726   | 2.67435     | 1.56468   | 1.85095   | 3.04491  | 3.59445  |
| PDCL3P4  | 0.33538   | 0.556238    | 0.0892541 | 0.161797  | 0.681773 | 0.847235 |
| PDCL3P5  | 1.35768   | 1.27344     | -1.61683  | -0.35792  | 2.10789  | 2.0291   |
| PDDC1    | 4.32881   | 4.42743     | 4.5478    | 4.65273   | 4.36619  | 4.0195   |
| PDE10A   | 4.00914   | 4.01996     | 2.95859   | 3.06859   | -1.90489 | -2.53597 |
| PDE12    | 5.28745   | 5.48076     | 4.31033   | 4.53772   | 5.87572  | 5.57346  |
| PDE1C    | 7.00038   | 7.43253     | -3.37468  | -3.52222  | 8.39538  | 8.57555  |
| PDE3A    | 0.0954519 | -0.399458 ? | ?         |           | 2.47974  | 2.55069  |
| PDE4A    | 1.10833   | 0.946604    | 1.662     | 1.80409   | 0.732078 | 0.50283  |
| PDE4B    | 5.35958   | 5.51154     | -0.375995 | -0.899117 | 4.32552  | 4.20317  |
| PDE4D    | 3.49852   | 3.5765      | 4.06576   | 4.10549   | 4.29968  | 4.4443   |
| PDE4DIP  | 4.39446   | 4.52285     | 5.51706   | 5.75488   | 5.26721  | 5.9055   |
| PDE5A    | 2.82767   | 2.86771     | 8.8469    | 8.32153   | 2.37268  | 2.30057  |
| PDE6D    | 2.96448   | 3.08791     | 2.86361   | 3.0686    | 2.80526  | 3.48558  |
| PDE7A    | 3.99446   | 4.00244     | 4.76769   | 4.55367   | 3.30379  | 2.70684  |
| PDE7B    | 0.628074  | 0.261747    | 2.14766   | 2.31971   | -3.6585  | -4.11926 |
| PDE8A    | 4.32051   | 4.3732      | 4.78729   | 4.90309   | 5.63746  | 5.5542   |
| PDE8B    | 1.93076   | 2.07887     | 2.25451   | 2.25564   | 1.2743   | 1.513    |
| PDF      | 0.526399  | 0.218781    | 0.227445  | 0.337665  | 2.27983  | 2.75153  |
| PDGFA    | 4.35892   | 4.34691     | 3.75017   | 3.77534   | 0.847548 | 1.5971   |
| PDGFC    | 3.72298   | 3.98112     | 4.78081   | 4.72167   | 5.334    | 5.06972  |
| PDGFD    | 0.510456  | 1.17556     | 6.35364   | 6.21668   | 3.92663  | 4.85074  |
| PDGFRA   | 3.27072   | 2.87401     | 5.57584   | 5.2638    | 7.05697  | 6.96184  |
| PDGFRB   | 1.48087   | 1.67161     | 7.55616   | 7.53303   | 3.27485  | 3.06478  |
| PDHA1    | 3.91448   | 3.89432     | 5.00235   | 5.37741   | 4.83303  | 4.81684  |
| PDHB     | 5.10105   | 5.14999     | 4.42382   | 4.8707    | 5.32782  | 5.99632  |
| PDHX     | 4.39726   | 4.39235     | 4.57696   | 4.9834    | 5.36199  | 5.606    |
| PDIA3    | 7.81446   | 7.68654     | 7.52932   | 7.8234    | 7.06191  | 7.18818  |
| PDIA3P1  | 6.81464   | 6.81739     | 6.61978   | 6.94324   | 6.13159  | 6.24266  |
| PDIA4    | 8.36336   | 8.34887     | 8.03411   | 8.4309    | 7.69209  | 7.96945  |

|          |           |          |           |            |          |          |
|----------|-----------|----------|-----------|------------|----------|----------|
| PDIA5    | 3.09866   | 3.12964  | 2.80233   | 3.2288     | 4.22311  | 4.49418  |
| PDIA6    | 8.50695   | 8.33102  | 7.44158   | 7.59284    | 7.96678  | 7.87917  |
| PDIK1L   | 3.38838   | 3.64175  | 2.57471   | 2.96264    | 3.60529  | 3.80503  |
| PDK1     | 4.99606   | 4.77316  | 5.04649   | 4.94915    | 6.59395  | 5.48182  |
| PDK2     | 2.33943   | 2.18922  | 2.8026    | 3.0068     | 2.17757  | 2.31015  |
| PDK3     | 1.49571   | 1.33161  | 2.9939    | 3.1391     | 2.71691  | 2.65085  |
| PDK4     | 1.73558   | 1.69706  | -1.13882  | -2.20128 ? |          | ?        |
| PDLIM1   | 3.23903   | 3.06463  | -0.973801 | -0.275776  | 3.65919  | 3.78513  |
| PDLIM1P4 | 1.83957   | 1.89895  | 0.0850983 | -0.40821   | -2.65941 | -2.53597 |
| PDLIM2   | 2.7738    | 2.62237  | 2.97532   | 3.08897    | 3.08826  | 3.62585  |
| PDLIM3   | 2.96448   | 2.72945  | 1.22592   | 1.66599    | 2.58049  | 2.56942  |
| PDLIM4   | 4.76751   | 4.82312  | -2.48229  | -2.52305   | 3.73629  | 3.70268  |
| PDLIM5   | 5.27498   | 5.40867  | 4.48536   | 4.77687    | 5.94977  | 5.78512  |
| PDLIM7   | 2.72929   | 2.53152  | 3.02837   | 3.24211    | 3.64348  | 3.87071  |
| PDP1     | 6.52434   | 6.03249  | 5.34297   | 5.84936    | 6.24767  | 5.99762  |
| PDP2     | 3.75624   | 3.86246  | 4.44492   | 4.68477    | 4.67953  | 4.78413  |
| PDPK1    | 4.56654   | 4.26094  | 4.72473   | 4.78499    | 5.02523  | 4.36287  |
| PDPK2P   | 0.728826  | 0.86637  | 1.27043   | 1.48704    | 1.16973  | 0.204078 |
| PDPR     | 5.88622   | 5.87821  | 6.03466   | 6.23235    | 7.01728  | 6.5901   |
| PDRG1    | 3.41955   | 3.29662  | 2.73165   | 3.06842    | 2.83351  | 3.00063  |
| PDS5A    | 6.75868   | 6.75961  | 6.05724   | 6.25748    | 7.14673  | 7.05772  |
| PDS5B    | 5.54913   | 5.43612  | 6.01706   | 5.89116    | 5.02048  | 4.94791  |
| PDSS1    | 2.48948   | 2.44366  | 1.26904   | 1.6443     | 2.44604  | 2.86315  |
| PDSS2    | 2.23757   | 2.17742  | 2.40521   | 2.63265    | 3.34672  | 2.98329  |
| PDXDC1   | 5.53722   | 5.40816  | 5.78504   | 6.07057    | 4.49262  | 4.56666  |
| PDXDC2P  | 2.94748   | 2.72125  | 3.60896   | 3.63151    | 3.08582  | 2.59129  |
| PDXK     | 4.57472   | 4.38578  | 5.472     | 5.5877     | 5.05434  | 4.90707  |
| PDXP     | 4.1632    | 4.01949  | 2.80843   | 2.85333    | 4.00191  | 3.44734  |
| PDZD11   | 3.51469   | 3.60593  | 3.62137   | 4.1682     | 4.64324  | 5.44093  |
| PDZD2    | 1.53936   | 1.01295  | 3.60602   | 3.73195    | 4.22615  | 3.64201  |
| PDZD4    | -0.207075 | -1.07024 | 1.76487   | 1.91357    | -3.19956 | -3.38329 |
| PDZD8    | 5.92652   | 5.95067  | 5.69945   | 5.90126    | 6.37702  | 6.28272  |
| PDZRN3   | 2.35335   | 2.36048  | 2.61709   | 3.24337    | 4.33812  | 4.4974   |
| PEA15    | 5.75132   | 5.71925  | 4.97948   | 5.73698    | 7.53948  | 7.84796  |
| PEAK1    | 5.59841   | 5.47195  | 5.59126   | 5.29788    | 5.96975  | 5.76395  |
| PEBP1    | 6.38105   | 6.25838  | 5.46694   | 5.74401    | 6.11194  | 6.00796  |
| PEBP1P2  | 1.50728   | 1.29339  | 0.492335  | 0.904288   | 1.1364   | 1.10092  |
| PECR     | 1.96506   | 1.92419  | 2.02546   | 2.17197    | 2.42317  | 2.78543  |
| PEF1     | 4.81189   | 4.8054   | 3.81287   | 4.31113    | 4.96631  | 5.27539  |
| PEG10    | 7.42028   | 6.79909  | 6.7281    | 6.68623    | 9.01984  | 9.09136  |
| PEG3     | 4.48586   | 4.47919  | -5.1783   | -4.52056 ? |          | -3.38329 |
| PELI1    | 3.67596   | 3.97073  | 2.11571   | 2.15798    | 3.43113  | 3.01439  |
| PELI2    | 4.05213   | 3.82761  | 3.9426    | 3.6208     | 4.65426  | 3.8988   |
| PELI3    | 2.957     | 2.89965  | 2.61009   | 2.69846    | 1.62449  | 1.48168  |
| PELO     | 4.24426   | 4.38339  | 4.45457   | 5.00968    | 4.32976  | 4.59017  |
| PELP1    | 3.75933   | 3.82717  | 4.08676   | 4.23213    | 3.82048  | 3.71114  |
| PEMT     | 1.53259   | 1.42969  | 1.07876   | 0.980545   | 1.65138  | 1.86456  |
| PEPD     | 3.87624   | 4.04227  | 3.15582   | 3.38445    | 4.18125  | 4.52551  |
| PER1     | 2.33711   | 1.80397  | 2.02595   | 1.76772    | 2.2254   | 1.80902  |
| PER2     | 1.8738    | 1.92463  | 2.49772   | 2.5062     | 3.04016  | 2.68626  |
| PER3     | 3.00212   | 2.84774  | 2.91732   | 2.9316     | 4.28388  | 3.9085   |
| PERP     | 5.39723   | 5.64398  | 6.3505    | 6.8399     | -5.65305 | -5.69922 |

|        |          |           |           |          |         |          |
|--------|----------|-----------|-----------|----------|---------|----------|
| PES1   | 5.65461  | 5.57915   | 4.68144   | 5.28829  | 5.25671 | 5.10065  |
| PET100 | 1.63229  | 1.69412   | 1.60334   | 1.85754  | 2.23854 | 2.53671  |
| PET117 | 3.65005  | 3.47518   | 2.53106   | 2.69521  | 3.00781 | 3.08605  |
| PEX1   | 4.0621   | 4.16791   | 4.9532    | 5.07188  | 3.81592 | 4.2783   |
| PEX10  | 2.30731  | 2.34674   | 2.25443   | 2.52928  | 2.93633 | 3.56263  |
| PEX11A | 2.06912  | 2.21313   | 2.75018   | 2.85984  | 1.67511 | 1.66836  |
| PEX11B | 3.05079  | 2.83147   | 3.06417   | 3.35616  | 3.06725 | 3.20618  |
| PEX12  | 2.2696   | 2.06074   | 1.99641   | 1.88555  | 2.60883 | 2.61523  |
| PEX13  | 4.24524  | 4.20672   | 4.2368    | 4.24202  | 4.95909 | 5.07313  |
| PEX14  | 2.06139  | 1.95562   | 2.04973   | 2.30862  | 2.59673 | 2.55724  |
| PEX16  | 1.4199   | 1.46793   | 1.69915   | 2.22211  | 2.07442 | 2.62421  |
| PEX19  | 5.00993  | 5.33914   | 4.60785   | 5.35955  | 4.61344 | 5.28414  |
| PEX2   | 3.81267  | 3.9801    | 3.99639   | 4.21872  | 4.74323 | 5.65907  |
| PEX26  | 5.86983  | 5.82019   | 4.96803   | 5.35325  | 5.65006 | 5.31142  |
| PEX3   | 2.63766  | 2.68123   | 3.01175   | 3.45549  | 3.4234  | 3.43908  |
| PEX5   | 4.02628  | 3.95184   | 3.67601   | 4.01141  | 3.20542 | 3.26483  |
| PEX5L  | 0.832372 | 0.592522  | 0.474784  | 0.605504 | 1.29974 | 0.597155 |
| PEX6   | 1.93394  | 1.65613   | 3.00135   | 3.07605  | 2.2734  | 2.55539  |
| PEX7   | 0.45076  | 0.344613  | 0.401532  | 1.0511   | 1.2881  | 1.88577  |
| PFAS   | 5.22867  | 5.11269   | 4.69529   | 4.87629  | 4.88125 | 4.5982   |
| PFDN1  | 4.46565  | 4.46567   | 4.46963   | 4.93272  | 5.00162 | 5.2835   |
| PFDN2  | 4.51886  | 4.56159   | 2.77649   | 3.25749  | 4.09624 | 4.18962  |
| PFDN4  | 4.49499  | 4.54485   | 3.56131   | 3.92321  | 3.39902 | 4.65742  |
| PFDN5  | 5.78676  | 5.79689   | 5.43666   | 5.86772  | 5.71255 | 6.76849  |
| PFDN6  | 4.03788  | 3.94199   | 3.21983   | 3.5089   | 4.84696 | 5.09118  |
| PFKFB2 | 3.65718  | 3.57817   | 2.65608   | 3.00824  | 3.25881 | 3.40224  |
| PFKFB3 | 4.08964  | 4.14355   | 4.77864   | 4.9003   | 7.52289 | 6.80948  |
| PFKFB4 | 4.85666  | 5.01836   | 3.14401   | 3.54254  | 6.8575  | 6.14554  |
| PFKL   | 3.48827  | 3.29871   | 5.21147   | 5.47236  | 4.56367 | 4.47071  |
| PFKM   | 5.2014   | 5.37322   | 4.92765   | 5.52282  | 5.0397  | 5.26433  |
| PFKP   | 5.60983  | 5.79751   | 5.70139   | 6.17831  | 6.87497 | 6.35127  |
| PFN1   | 7.56194  | 7.47583   | 7.0945    | 7.51769  | 8.48206 | 8.63368  |
| PFN1P1 | 3.16335  | 3.23706   | 2.76917   | 3.13228  | 4.12358 | 4.24509  |
| PFN1P2 | 2.44147  | 2.6904    | 2.1773    | 2.24284  | 2.61511 | 2.19391  |
| PFN1P9 | 0.323393 | 0.060836  | -0.325375 | 0.100749 | 1.04018 | 0.702755 |
| PFN2   | 5.75601  | 5.86221   | 6.76176   | 7.02638  | 7.36352 | 7.87475  |
| PGAM1  | 6.7404   | 6.59506   | 7.23649   | 7.58064  | 8.49173 | 8.41232  |
| PGAM4  | 0.249482 | 0.0253974 | 0.8767    | 1.4248   | 1.86345 | 2.06402  |
| PGAM5  | 5.46301  | 5.46528   | 4.11109   | 4.52416  | 5.665   | 5.8193   |
| PGAP1  | 4.7303   | 4.76294   | 4.08326   | 3.80854  | 4.71309 | 4.44049  |
| PGAP2  | 2.33436  | 2.22367   | 1.81086   | 1.7241   | 2.30837 | 2.06149  |
| PGAP3  | 1.33988  | 1.2854    | 2.14741   | 2.19497  | 1.98357 | 2.17595  |
| PGBD1  | 2.26383  | 2.35095   | 2.53759   | 2.99184  | 3.0761  | 3.28481  |
| PGBD2  | 2.36971  | 2.35095   | 1.42385   | 1.21315  | 1.18523 | 1.55071  |
| PGBD4  | 2.52252  | 2.50871   | 1.90396   | 2.03585  | 1.99792 | 1.78517  |
| PGD    | 5.86957  | 5.84952   | 7.70741   | 8.19873  | 6.92232 | 7.00204  |
| PGDP1  | 1.42009  | 1.75558   | 3.40931   | 3.97141  | 2.67431 | 2.32959  |
| PGF    | 1.399    | 1.33161 ? |           | -3.30006 | 3.33687 | 3.48558  |
| PGGT1B | 4.50901  | 4.64066   | 4.69575   | 4.85296  | 4.95204 | 5.16426  |
| PGK1   | 7.80055  | 7.6937    | 8.28993   | 8.67402  | 10.0298 | 9.40979  |
| PGK1P2 | 2.34544  | 2.30189   | 2.93505   | 3.44027  | 4.6983  | 3.86745  |
| PGLS   | 2.50983  | 2.14774   | 2.64938   | 2.70797  | 2.72124 | 3.12607  |

|           |           |           |           |            |          |           |
|-----------|-----------|-----------|-----------|------------|----------|-----------|
| PGM1      | 5.04533   | 4.91599   | 5.40139   | 5.88724    | 5.43744  | 5.16516   |
| PGM2      | 3.3562    | 3.70456   | 3.53757   | 4.21084    | 5.52363  | 5.75578   |
| PGM2L1    | 3.47335   | 3.33158   | 2.68377   | 2.94103    | 7.75909  | 7.64435   |
| PGM3      | 5.53091   | 5.77498   | 4.49266   | 4.97348    | 5.39737  | 5.81729   |
| PGM5P2    | 2.167     | 1.99781   | -0.236079 | -0.290822  | 5.20843  | 4.49679   |
| PGP       | 4.00135   | 4.036     | 3.49771   | 3.87985    | 3.54549  | 3.59935   |
| PGPEP1    | 3.00483   | 2.82948   | 4.26149   | 4.66595    | 5.33685  | 5.08688   |
| PGRMC1    | 3.4392    | 3.74294   | 5.87446   | 6.26192    | 6.97783  | 7.32674   |
| PGRMC2    | 4.03393   | 4.02298   | 4.51951   | 4.53772    | 4.83902  | 4.78011   |
| PGS1      | 4.31074   | 4.20692   | 4.32624   | 4.4515     | 4.441    | 4.13877   |
| PHACTR1   | 3.16639   | 2.66939   | 0.961623  | 1.17071    | 0.173972 | -0.151434 |
| PHACTR2   | 4.31144   | 4.19715   | 5.11339   | 5.35008    | 4.73789  | 4.4811    |
| PHACTR2P1 | 1.80874   | 1.72206   | -0.69145  | -0.682344  | 0.670686 | -1.006    |
| PHACTR4   | 4.19042   | 4.38185   | 3.72185   | 4.07232    | 4.69447  | 4.69416   |
| PHAX      | 4.8957    | 5.15048   | 4.58877   | 5.20064    | 5.51774  | 5.91579   |
| PHB       | 6.46563   | 6.37768   | 5.51987   | 6.03475    | 6.11697  | 6.61032   |
| PHB2      | 6.70863   | 6.56994   | 5.66035   | 5.98684    | 6.50073  | 6.77704   |
| PHBP11    | 0.0387312 | 0.316644  | -0.392857 | -0.0509911 | 0.15056  | 0.148205  |
| PHBP21    | 1.13567   | 1.13149   | 0.631328  | 0.935075   | 1.09807  | 1.25511   |
| PHBP9     | 0.739088  | 0.598746  | 0.189034  | 0.53827    | 0.367785 | 0.272716  |
| PHC1      | 3.09667   | 2.85578   | 2.90495   | 2.9118     | 2.91952  | 2.80908   |
| PHC1P1    | 2.77649   | 2.59737   | 2.95794   | 2.82772    | 2.87007  | 2.54244   |
| PHC2      | 5.29522   | 5.21009   | 4.7786    | 4.9264     | 5.49756  | 5.45302   |
| PHC3      | 5.45256   | 5.38262   | 6.6828    | 6.68089    | 6.13427  | 5.66886   |
| PHEX      | 1.80477   | 2.51445   | -0.482896 | 1.24877    | 2.12761  | 2.5925    |
| PHF1      | 3.17437   | 2.94655   | 3.5444    | 3.68559    | 4.071    | 3.74655   |
| PHF10     | 4.42442   | 4.96993   | 3.93087   | 4.20041    | 4.76691  | 4.60119   |
| PHF11     | 1.56305   | 1.78985   | 2.03567   | 2.04601    | 2.49705  | 2.58792   |
| PHF12     | 3.9694    | 3.80793   | 4.59135   | 4.60026    | 4.42504  | 4.0805    |
| PHF13     | 3.91378   | 3.79807   | 4.13502   | 4.02688    | 4.12922  | 3.80108   |
| PHF14     | 5.30303   | 5.26208   | 5.49286   | 5.34083    | 5.1832   | 5.19792   |
| PHF19     | 5.44205   | 5.40133   | 4.15186   | 4.64103    | 5.30978  | 5.23065   |
| PHF2      | 3.46205   | 3.29704   | 3.44948   | 3.50404    | 3.44035  | 2.95151   |
| PHF20     | 5.60154   | 5.48843   | 5.26252   | 5.35418    | 4.96539  | 4.67806   |
| PHF20L1   | 5.29731   | 5.25649   | 5.94821   | 6.0223     | 6.10238  | 5.90078   |
| PHF21A    | 3.52613   | 3.24106   | 3.9889    | 3.88269    | 4.31983  | 3.8726    |
| PHF23     | 4.79676   | 4.79513   | 4.39579   | 4.77687    | 5.48847  | 5.81879   |
| PHF3      | 6.91108   | 7.04663   | 6.03986   | 6.2654     | 6.37428  | 6.63256   |
| PHF5A     | 3.98829   | 3.95606   | 3.65252   | 4.24872    | 4.13489  | 5.02372   |
| PHF6      | 4.45763   | 4.39358   | 5.26976   | 5.43952    | 5.76362  | 5.53049   |
| PHF7      | 0.323393  | -0.122853 | 0.208904  | 0.0811214  | 0.643551 | 0.0213376 |
| PHF8      | 3.8971    | 3.71707   | 2.61415   | 2.74916    | 3.15987  | 2.85554   |
| PHGDH     | 5.00265   | 5.33886   | 4.925     | 5.71375    | 5.85783  | 6.03387   |
| PHIP      | 7.15541   | 7.16008   | 6.05638   | 6.05339    | 6.81008  | 6.59984   |
| PHKA1     | 3.84692   | 3.90306   | 2.05588   | 2.07663    | 3.83861  | 3.50386   |
| PHKA1P1   | 1.53892   | 1.4037    | 0.116644  | 0.117934   | 1.59204  | 0.987408  |
| PHKA2     | 2.82676   | 2.50465   | 3.64775   | 3.60103    | 2.91017  | 2.44812   |
| PHKB      | 3.71156   | 3.80159   | 5.46526   | 5.52786    | 5.91592  | 5.93578   |
| PHKG1     | 0.35156   | 0.351413  | 0.46925   | 0.825061   | 0.182985 | -0.921907 |
| PHKG2     | 3.55714   | 3.44856   | 3.93957   | 4.24054    | 3.64777  | 3.3282    |
| PHLDA1    | 7.58949   | 7.41869   | 7.26234   | 7.50696    | 6.2367   | 6.0104    |
| PHLDA2    | 1.42508   | 1.15925   | 0.64945   | 0.946514   | 0.469063 | 0.847941  |

|          |          |           |           |           |          |          |
|----------|----------|-----------|-----------|-----------|----------|----------|
| PHLDA3   | 4.08392  | 4.19357   | 2.30433   | 2.52418   | 2.55644  | 2.95863  |
| PHLDB1   | 5.21693  | 5.22549   | 4.90472   | 5.02676   | 5.20505  | 4.79758  |
| PHLDB2   | 4.56359  | 4.946     | 5.57218   | 5.5877    | 4.00679  | 3.9135   |
| PHLDB3   | 0.207918 | 0.195474  | 0.208904  | 0.0410467 | 1.05399  | 0.68568  |
| PHLPP1   | 4.12029  | 3.82371   | 1.97132   | 1.61913   | 3.6862   | 3.48311  |
| PHLPP2   | 4.67347  | 4.29238   | 5.13379   | 5.10371   | 6.32891  | 5.30144  |
| PHOSPHO2 | 0.760783 | 0.480917  | -0.163022 | 0.392372  | 0.249178 | 0.970684 |
| PHPT1    | 4.19875  | 3.90237   | 2.81649   | 3.01788   | 3.53321  | 4.20467  |
| PHRF1    | 4.84974  | 4.60054   | 4.76629   | 4.88126   | 4.26228  | 4.05484  |
| PHTF1    | 4.75316  | 4.7821    | 5.24953   | 5.3106    | 4.96219  | 4.97011  |
| PHTF2    | 4.94206  | 4.7362    | 5.85023   | 5.71333   | 5.38885  | 5.08118  |
| PHYH     | 1.56774  | 1.54842   | 1.20023   | 1.71775   | 0.807363 | 1.24753  |
| PHYKPL   | 3.30463  | 3.2657    | 4.43853   | 4.46077   | 4.10385  | 3.78359  |
| PI15     | 0.885949 | -0.354151 | 5.81612   | 3.69045   | 6.70696  | 6.86787  |
| PI4K2A   | 4.34103  | 4.00666   | 4.02979   | 4.2536    | 4.1764   | 3.47046  |
| PI4K2B   | 3.95734  | 4.10035   | 3.09708   | 3.58117   | 4.39565  | 4.86882  |
| PI4KA    | 5.57828  | 5.53664   | 5.23753   | 5.54278   | 4.79637  | 4.80129  |
| PI4KAP1  | 3.12356  | 2.8243    | 2.41342   | 2.16891   | 1.42838  | 0.227692 |
| PI4KAP2  | 3.2941   | 3.14018   | 3.32872   | 3.27366   | 2.35686  | 1.44     |
| PI4KB    | 5.62499  | 5.68998   | 5.0635    | 5.51416   | 5.98899  | 6.10603  |
| PIAS1    | 4.63301  | 4.55879   | 5.14332   | 5.23137   | 4.66043  | 4.43577  |
| PIAS2    | 5.9339   | 5.99657   | 4.59125   | 4.56976   | 4.23223  | 3.58791  |
| PIAS3    | 3.52813  | 3.45175   | 3.70386   | 3.8426    | 3.57662  | 3.52012  |
| PIAS4    | 2.49569  | 2.37637   | 2.01126   | 2.27489   | 3.52332  | 3.20318  |
| PIBF1    | 3.70286  | 3.87143   | 3.60927   | 3.66761   | 2.68621  | 3.48804  |
| PICALM   | 5.51646  | 5.52833   | 6.34098   | 6.54065   | 6.19085  | 6.30205  |
| PICK1    | 1.15272  | 0.868134  | 1.12031   | 1.17663   | 2.98535  | 2.84396  |
| PID1     | 0.409538 | 0.804012  | -1.72363  | -0.493928 | 1.41119  | 2.11348  |
| PIDD1    | 2.30375  | 1.59788   | 2.40895   | 2.2041    | 1.46387  | 1.33774  |
| PIEZO1   | 5.82258  | 5.57356   | 5.57272   | 5.59473   | 4.88348  | 4.80086  |
| PIEZO2   | -5.10914 | -4.87366  | 1.5643    | 1.76772   | 3.57844  | 3.29011  |
| PIF1     | 2.98216  | 2.9423    | 3.02837   | 3.23547   | 2.90194  | 2.34315  |
| PIGA     | 2.72929  | 2.67415   | 3.01369   | 3.37701   | 3.3516   | 3.34041  |
| PIGB     | 2.40297  | 2.42283   | 2.4326    | 2.6784    | 3.42848  | 4.15497  |
| PIGBOS1  | 1.51694  | 1.60037   | 0.942601  | 1.20142   | 1.5356   | 1.75777  |
| PIGC     | 4.51097  | 4.46713   | 3.32229   | 3.60884   | 4.23904  | 4.03811  |
| PIGCP1   | 1.77435  | 2.05927   | 0.478288  | 0.850191  | 1.30953  | 1.32861  |
| PIGF     | 3.52638  | 3.49326   | 3.19089   | 3.27934   | 3.4066   | 4.0197   |
| PIGG     | 4.83229  | 4.95553   | 4.67056   | 4.89749   | 5.50961  | 5.63701  |
| PIGH     | 2.99076  | 3.08235   | 1.82053   | 2.42897   | 2.04196  | 2.78044  |
| PIGK     | 5.27894  | 5.43159   | 5.34442   | 5.84173   | 5.34071  | 5.97931  |
| PIGL     | 1.9939   | 1.9883    | 3.03003   | 3.00574   | 2.82819  | 2.5173   |
| PIGM     | 3.88869  | 3.81909   | 3.48182   | 3.27488   | 3.58286  | 3.15748  |
| PIGN     | 4.81465  | 4.85852   | 4.23959   | 4.72325   | 3.25707  | 3.69629  |
| PIGO     | 4.98347  | 4.79512   | 4.01983   | 4.19609   | 5.27447  | 5.16594  |
| PIGP     | 1.82451  | 1.72206   | 2.77649   | 2.8968    | 1.45867  | 2.00067  |
| PIGQ     | 2.94658  | 2.60863   | 3.59455   | 3.68827   | 2.56667  | 2.80505  |
| PIGS     | 4.7371   | 4.71393   | 5.05964   | 5.37245   | 5.24881  | 5.17974  |
| PIGT     | 6.33394  | 6.32035   | 5.62301   | 5.9532    | 5.76227  | 5.7414   |
| PIGU     | 4.41689  | 4.28211   | 3.93301   | 3.95383   | 3.89253  | 3.78269  |
| PIGUP1   | 1.16849  | 1.16529   | 0.881007  | 0.816649  | 0.772823 | 0.275722 |
| PIGV     | 3.29244  | 3.20249   | 3.10881   | 3.28564   | 2.67509  | 2.91168  |

|            |           |           |           |           |           |          |
|------------|-----------|-----------|-----------|-----------|-----------|----------|
| PIGW       | 3.8107    | 3.84129   | 3.12842   | 3.41035   | 4.14915   | 4.11322  |
| PIGX       | 3.0534    | 3.18668   | 4.08027   | 4.39895   | 3.49011   | 3.72022  |
| PIGZ       | 0.577131  | 0.581631  | 1.16526   | 1.17663   | -0.878698 | -1.006   |
| PIH1D1     | 4.68413   | 4.55951   | 3.74277   | 3.98392   | 5.64772   | 5.52989  |
| PIK3C2A    | 6.10545   | 6.0862    | 6.08968   | 6.18119   | 6.06865   | 6.0398   |
| PIK3C2B    | 1.51528   | 1.46201   | 3.26769   | 3.28992   | 0.878914  | 0.769095 |
| PIK3C3     | 5.75186   | 5.75662   | 4.22904   | 4.24762   | 4.73576   | 4.77205  |
| PIK3CA     | 4.50139   | 4.68268   | 5.21104   | 5.58034   | 5.54754   | 6.10368  |
| PIK3CB     | 3.92388   | 3.79572   | 3.63665   | 3.79956   | 3.74483   | 3.99719  |
| PIK3CD     | 3.60698   | 3.52015   | 2.29306   | 2.75537   | 3.74424   | 3.37009  |
| PIK3CG     | 1.35081   | 1.72701   | -2.48229  | -4.10635  | 0.147163  | 0.50283  |
| PIK3R1     | 4.71823   | 4.72078   | 4.65646   | 4.6758    | 6.29605   | 6.10383  |
| PIK3R2     | 2.74199   | 2.11777   | 2.4709    | 1.91492   | 4.21501   | 3.5074   |
| PIK3R3     | 4.11069   | 3.62595   | 5.15019   | 5.3169    | 4.75805   | 4.5982   |
| PIK3R4     | 5.03223   | 5.08886   | 4.90592   | 5.13909   | 4.87835   | 4.89319  |
| PIKFYVE    | 5.76391   | 5.72914   | 5.58796   | 5.74485   | 5.88585   | 5.66832  |
| PILRB      | 4.78305   | 4.52621   | 4.06354   | 4.16086   | 4.15679   | 3.25713  |
| PIM1       | 2.56303   | 2.66387   | 3.18498   | 3.28349   | 3.13736   | 3.05816  |
| PIM2       | 2.87457   | 3.23586   | 1.74132   | 2.61228   | 2.46641   | 2.80505  |
| PIM3       | 4.00135   | 3.77913   | 4.1384    | 4.36182   | 2.82955   | 3.30452  |
| PIN1       | 3.47584   | 3.31359   | 3.19586   | 3.57942   | 4.35858   | 4.60047  |
| PIN4       | 3.08559   | 3.07573   | 3.32665   | 3.54225   | 3.28679   | 3.60628  |
| PIN4P1     | 0.839935  | 0.816166  | 0.943756  | 1.51317   | 1.12681   | 0.877634 |
| PINK1      | 3.17575   | 3.10401   | 4.47086   | 5.02827   | 3.3044    | 3.34392  |
| PINK1-AS   | 2.47504   | 2.33648   | 3.66084   | 3.6066    | 2.56144   | 1.74798  |
| PINX1      | 2.45268   | 2.40807   | 1.89332   | 2.34652   | 1.60651   | 2.10066  |
| PIP4K2A    | 3.36969   | 3.57333   | 3.30231   | 3.76769   | 4.88078   | 4.98416  |
| PIP4K2B    | 5.80549   | 5.62261   | 5.5863    | 5.65603   | 5.86447   | 5.41675  |
| PIP4K2C    | 2.77868   | 2.91654   | 3.26975   | 3.65272   | 4.24809   | 4.3363   |
| PIP5K1A    | 6.11007   | 6.13225   | 5.40108   | 5.72753   | 5.93594   | 5.83762  |
| PIP5K1C    | 2.68463   | 2.23761   | 2.67136   | 2.58118   | 3.04013   | 2.908    |
| PIPOX      | -2.69815  | -2.76144  | -0.787939 | -0.463167 | 3.5762    | 4.27199  |
| PIPSL      | 4.32747   | 4.55099   | 3.98777   | 4.4013    | 4.44891   | 4.62564  |
| PIR        | 2.82448   | 3.07438   | 4.99949   | 5.21701   | 3.49451   | 3.98503  |
| PISD       | 4.31841   | 4.15094   | 4.24901   | 4.33098   | 3.96448   | 3.89876  |
| PITHD1     | 3.95465   | 4.11269   | 3.28001   | 3.96397   | 5.0059    | 5.16287  |
| PITPNA     | 4.91604   | 4.86288   | 4.91749   | 5.0649    | 5.58434   | 5.40958  |
| PITPNA-AS1 | 0.441441  | 0.184623  | -0.265573 | -0.652282 | 1.53938   | 1.91593  |
| PITPNB     | 5.11804   | 5.2192    | 4.76213   | 4.97714   | 4.60676   | 4.75499  |
| PITPNC1    | 3.91654   | 3.48698   | 1.15638   | 0.82198   | 1.79915   | 1.06153  |
| PITPNM1    | 2.93028   | 2.52016   | 3.47468   | 3.85696   | 3.28221   | 3.56474  |
| PITPNM2    | 3.94747   | 3.63782   | 2.81648   | 3.00752   | 2.99254   | 2.78915  |
| PITPNM3    | -2.23844  | -2.2135   | 0.358711  | 0.370611  | 2.43035   | 2.93115  |
| PITRM1     | 4.82925   | 4.76112   | 4.64947   | 5.18203   | 4.87152   | 4.81186  |
| PITRM1-AS1 | 0.88027   | 0.84145   | 1.199     | 1.1056    | 1.20178   | 0.614729 |
| PITX1      | 0.345419  | -0.292756 | 3.36578   | 3.22474   | 1.67064   | 1.71117  |
| PITX2      | -1.74441  | -2.06994  | 1.48894   | 1.59165   | 2.07442   | 2.06149  |
| PJA1       | 3.09046   | 3.2887    | 3.89329   | 4.31428   | 3.17889   | 3.23581  |
| PJA2       | 6.07963   | 6.09607   | 6.0853    | 6.29713   | 7.12616   | 7.14287  |
| PKD1       | 3.28244   | 2.62864   | 4.60364   | 4.51037   | 4.53143   | 4.11084  |
| PKD1P1     | -0.579698 | -0.180649 | 1.35014   | 1.97176   | 0.673068  | 1.10064  |
| PKD1P6     | 1.10593   | 0.845727  | 2.39355   | 2.43316   | 1.19974   | 0.738353 |



|            |            |           |           |           |           |          |
|------------|------------|-----------|-----------|-----------|-----------|----------|
| PKD2       | 4.49996    | 4.518     | 5.29523   | 5.42546   | 4.73629   | 4.74654  |
| PKDCC      | 2.76241    | 1.68185   | 1.79379   | 1.46107   | -3.85089  | -3.12051 |
| PKI55      | 3.5429     | 3.79572   | 2.89597   | 3.17195   | 3.15347   | 3.46322  |
| PKIA       | 1.77668    | 2.09942   | -3.18222  | -2.93781  | 2.93775   | 3.57638  |
| PKIG       | 3.18966    | 3.02299   | 3.2045    | 3.44      | 2.61815   | 2.92991  |
| PKM        | 9.77904    | 9.76454   | 10.2896   | 10.9265   | 10.9734   | 11.0464  |
| PKMP1      | 3.9439     | 4.1848    | 4.61312   | 5.25804   | 5.34451   | 5.07415  |
| PKMP4      | 0.985945   | 1.49719   | 1.98643   | 2.65273   | 2.41117   | 2.31023  |
| PKMP5      | 2.08566    | 2.33827   | 2.75024   | 3.46493   | 3.52462   | 3.09107  |
| PKMYT1     | 3.31642    | 3.08041   | 2.98245   | 2.97761   | 1.96474   | 1.87817  |
| PKN1       | 3.70393    | 3.51014   | 4.21521   | 4.6301    | 4.53381   | 4.69096  |
| PKN2       | 5.80996    | 5.85202   | 5.82385   | 5.94306   | 5.88009   | 5.90477  |
| PKN3       | 2.45828    | 1.93806   | 1.34008   | 1.42259   | 1.04711   | 0.633217 |
| PKNOX1     | 2.79878    | 2.77795   | 3.13615   | 3.51139   | 2.60414   | 2.88575  |
| PKNOX2     | 2.51038    | 1.88591   | -4.59508  | -3.10759  | -5.65305  | -5.69922 |
| PKP2       | -5.69162 ? |           | 0.045429  | 0.280659  | 2.71066   | 2.50275  |
| PKP3       | 1.73558    | 1.38894   | -0.659745 | 0.020584  | -1.95932  | -1.89883 |
| PKP4       | 5.86044    | 5.70449   | 4.85694   | 4.94593   | 5.95406   | 5.55484  |
| PLA2G12A   | 3.5752     | 3.8654    | 3.67579   | 4.00516   | 3.77493   | 4.35562  |
| PLA2G12AP1 | -0.182033  | 0.200755  | 0.373286  | 0.31436   | 0.483457  | 1.00453  |
| PLA2G15    | 4.09452    | 3.48698   | 4.27487   | 4.01141   | 4.9997    | 4.52809  |
| PLA2G16    | 3.17436    | 3.07049   | 1.43123   | 2.19497   | 3.14221   | 3.48064  |
| PLA2G4A    | 3.5967     | 3.71332   | 3.8595    | 4.40489   | 2.88079   | 3.75066  |
| PLA2G6     | 1.56189    | 1.58519   | 1.16171   | 0.789988  | 0.825354  | 0.456028 |
| PLAA       | 4.51338    | 4.77371   | 4.47465   | 4.87339   | 5.91156   | 6.15392  |
| PLAC4      | 4.26525    | 4.52937   | 3.94833   | 3.53142   | 1.94705   | 1.55071  |
| PLAG1      | 3.52973    | 3.37004   | 1.94578   | 1.80409   | 1.56854   | 0.97985  |
| PLAGL1     | -4.11163   | -5.45651  | -6.17309  | -5.10387  | 2.83155   | 1.20023  |
| PLAGL2     | 3.92141    | 3.9755    | 3.77327   | 3.89095   | 3.25536   | 3.19416  |
| PLAT       | 7.97865    | 8.22657   | 2.93802   | 2.77687   | 6.677     | 6.02077  |
| PLAU       | -2.46283   | -2.00285  | 6.28794   | 7.29456   | 7.00792   | 7.47526  |
| PLAUR      | 4.03902    | 4.16651   | 2.65569   | 3.90798   | 4.02619   | 4.0058   |
| PLBD1      | 4.99951    | 4.92824   | -3.18222  | -3.52222  | -1.33803  | -1.61882 |
| PLBD2      | 3.85454    | 3.51729   | 4.26665   | 4.22544   | 3.07101   | 3.14816  |
| PLCB1      | 3.81219    | 4.08886   | -0.229171 | -0.108685 | 6.18085   | 5.81537  |
| PLCB3      | 4.36564    | 4.25655   | 3.90393   | 4.08099   | 3.77537   | 3.55773  |
| PLCB4      | 4.17128    | 4.04593   | 4.27384   | 3.59507   | -0.267833 | -1.31405 |
| PLCD1      | 1.27825    | 0.920918  | 1.88259   | 1.85699   | 1.52955   | 1.52214  |
| PLCD3      | 2.82645    | 2.56784   | 3.01124   | 3.27488   | 3.42184   | 3.46822  |
| PLCD4      | 1.2353     | 1.06379   | 2.14936   | 2.42547   | 3.44245   | 3.40013  |
| PLCE1      | 5.18861    | 5.29588   | 2.89863   | 2.9997    | 5.30416   | 5.34975  |
| PLCG1      | 6.63373    | 6.46632   | 6.66148   | 6.58623   | 5.71381   | 4.94786  |
| PLCG2      | -0.489066  | -0.598389 | 0.121519  | 0.8424 ?  |           | ?        |
| PLCL2      | 3.33295    | 3.44854   | 1.14744   | 1.24877   | 4.08621   | 4.67049  |
| PLCXD1     | 3.22276    | 2.84322   | 2.32428   | 2.28779   | 1.7868    | 0.597145 |
| PLD1       | 4.85215    | 4.4928    | 3.6822    | 3.97198   | 3.87009   | 3.90246  |
| PLD2       | 3.1682     | 2.87032   | 3.08794   | 3.22433   | 3.30836   | 3.08445  |
| PLD3       | 5.00481    | 4.76596   | 4.73534   | 5.03072   | 4.39428   | 4.44176  |
| PLD6       | 1.91846    | 1.82432   | -2.86056  | -3.30006  | 1.88025   | 1.16369  |
| PLEC       | 6.61819    | 6.5905    | 7.62314   | 7.62666   | 6.34201   | 6.65548  |
| PLEKHA1    | 4.93432    | 4.66432   | 3.62668   | 3.2903    | 5.07376   | 4.09419  |
| PLEKHA2    | 1.48085    | 1.338     | 4.77502   | 5.06671   | 5.68149   | 5.61577  |

|           |           |           |           |           |           |             |
|-----------|-----------|-----------|-----------|-----------|-----------|-------------|
| PLEKHA3   | 4.23351   | 4.43679   | 5.30109   | 5.67456   | 4.97211   | 5.10007     |
| PLEKHA3P1 | -0.984948 | -0.639539 | 0.265941  | 0.989684  | 0.699401  | 0.903686    |
| PLEKHA4   | 3.60355   | 3.59107   | 2.759     | 2.98658   | -0.121008 | -0.348991   |
| PLEKHA5   | 4.54411   | 4.59987   | 4.75311   | 4.83147   | 0.99089   | 1.29333     |
| PLEKHA6   | -6.68418  | -4.45968  | 4.08795   | 4.90241   | -4.65668  | -4.70296    |
| PLEKHA7   | -5.10914  | -4.13839  | -4.59508  | -2.64851  | 4.29968   | 3.84595     |
| PLEKHA8   | 4.86764   | 4.64005   | 5.0789    | 5.02124   | 4.81722   | 4.1565      |
| PLEKHA8P1 | 2.4571    | 2.3846    | 2.37287   | 2.49414   | 2.23579   | 1.92721     |
| PLEKHB1   | 3.46959   | 3.40905   | -1.72363  | -1.78641  | 3.61347   | 3.3834      |
| PLEKHB2   | 6.15942   | 6.22077   | 5.55126   | 6.0749    | 6.74412   | 6.93916     |
| PLEKHF1   | -0.175369 | -0.354149 | 1.71737   | 2.16265   | 2.24359   | 2.78114     |
| PLEKHF2   | 2.54172   | 2.72451   | 2.48182   | 2.90799   | 2.99612   | 3.2181      |
| PLEKHG1   | 3.60355   | 3.55117   | -1.13882  | -1.86039  | 6.89927   | 6.8598      |
| PLEKHG2   | 3.40421   | 3.0568    | 4.01615   | 3.62589   | 3.89619   | 3.07137     |
| PLEKHG3   | 3.43681   | 3.34621   | 2.54313   | 2.47199   | 0.790972  | -0.00615756 |
| PLEKHG5   | 1.01523   | 1.15926   | 3.1088    | 2.77688   | 3.14705   | 2.908       |
| PLEKHG6   | -0.45097  | -0.681268 | 1.29225   | 1.04098   | -0.753191 | -1.61882    |
| PLEKHH1   | 3.42274   | 3.08613   | -0.368676 | -0.430946 | 0.885949  | -0.255853   |
| PLEKHH2   | 2.7082    | 2.44105   | 2.31235   | 1.61231   | 3.71364   | 2.91167     |
| PLEKHH3   | 1.93757   | 1.45008   | 2.16522   | 2.25751   | 2.3397    | 1.95152     |
| PLEKHJ1   | 3.30354   | 3.13272   | 2.97308   | 2.9522    | 4.45238   | 4.44585     |
| PLEKHM1   | 3.24967   | 3.08446   | 3.66      | 3.88547   | 3.92889   | 3.9308      |
| PLEKHM1P  | 2.68869   | 2.51548   | 3.59292   | 3.57354   | 3.6541    | 3.10887     |
| PLEKHM2   | 4.00575   | 3.74209   | 4.20621   | 4.43303   | 4.94364   | 4.95317     |
| PLEKHM3   | 2.22871   | 2.1482    | 2.03567   | 1.76157   | 2.31699   | 2.19417     |
| PLEKHO1   | 3.76035   | 3.39358   | 3.3498    | 3.51871   | 3.3298    | 2.76497     |
| PLEKHO2   | 3.4068    | 3.20137   | 3.91185   | 4.2638    | 2.30332   | 2.00067     |
| PLEKHS1   | -1.52875  | -2.37465  | 0.996447  | 1.0511    | 0.886652  | -0.577229   |
| PLGRKT    | 1.16516   | 1.14454   | 1.57806   | 2.03075   | 3.22234   | 4.19264     |
| PLIN2     | -3.2383   | -3.00228  | 3.04289   | 3.65438   | -4.65668  | -5.69922    |
| PLIN3     | 4.30093   | 4.1882    | 4.54099   | 5.07107   | 5.08869   | 5.38271     |
| PLK1      | 4.8224    | 4.84617   | 4.39202   | 4.79506   | 4.46002   | 4.39947     |
| PLK2      | 5.15032   | 4.84264   | 7.60082   | 7.98547   | 5.95943   | 6.33253     |
| PLK3      | 0.878411  | 1.18826   | 1.36281   | 2.06612   | 1.63434   | 2.0681      |
| PLK4      | 4.75213   | 4.77674   | 4.0891    | 4.2176    | 4.41315   | 4.49172     |
| PLLP      | 1.03142   | 1.41318   | 1.16273   | 1.92826   | 2.23755   | 2.24759     |
| PLOD1     | 6.5412    | 6.35035   | 6.8244    | 6.87946   | 8.1477    | 7.17766     |
| PLOD2     | 6.78522   | 6.81632   | 8.97505   | 9.42493   | 8.62684   | 8.03934     |
| PLOD3     | 7.04414   | 6.69891   | 5.54219   | 5.58679   | 5.86444   | 5.43258     |
| PLP1      | 6.21976   | 6.12732   | -0.300715 | -0.464785 | -1.57243  | -3.38329    |
| PLP2      | 4.82693   | 4.88531   | 4.80161   | 5.52644   | 4.34249   | 4.69201     |
| PLRG1     | 5.08145   | 5.22627   | 4.84576   | 5.27971   | 4.91428   | 5.51788     |
| PLS1      | 2.60471   | 3.11648   | 1.75902   | 2.44577   | 3.62739   | 4.33768     |
| PLS3      | 4.79125   | 4.97282   | 6.23826   | 6.75463   | 7.63453   | 8.50785     |
| PLSCR1    | 2.9321    | 3.08019   | 3.98389   | 4.13553   | 4.97177   | 5.15436     |
| PLSCR4    | 1.05586   | 1.43806   | 4.47735   | 5.03581   | 1.46385   | 2.02123     |
| PLXNA1    | 5.22051   | 4.9832    | 5.87412   | 5.69488   | 4.9599    | 4.54712     |
| PLXNA2    | 1.12115   | 0.877069  | 3.9509    | 3.80854   | -0.594016 | -0.706491   |
| PLXNA3    | 3.17897   | 2.94443   | 3.18499   | 3.4206    | 3.55053   | 2.94075     |
| PLXNB1    | 4.80026   | 4.25739   | 3.52901   | 3.4686    | 3.94238   | 3.6618      |
| PLXNB2    | 5.92183   | 5.67287   | 6.92154   | 6.74893   | 5.31445   | 4.97977     |
| PLXNB3    | 3.28252   | 2.69264   | 2.31824   | 2.32464   | 3.05642   | 2.76088     |

|              |            |           |          |          |           |            |
|--------------|------------|-----------|----------|----------|-----------|------------|
| PLXNC1       | 2.28188    | 2.42354   | 2.67243  | 3.55304  | 0.818106  | 0.886722   |
| PLXND1       | 4.05497    | 3.8375    | 6.19556  | 6.00198  | 6.08682   | 5.90936    |
| PM20D2       | 4.0691     | 4.51514   | 1.61093  | 2.14386  | 3.02269   | 2.9515     |
| PMAIP1       | 4.21456    | 4.34127   | 3.54781  | 4.001    | 4.47731   | 4.71007    |
| PMEPA1       | 8.35444    | 8.48442   | 3.31149  | 3.31192  | 6.3146    | 6.12273    |
| PMF1         | 4.27981    | 4.21411   | 2.76234  | 3.17073  | 4.02306   | 4.31087    |
| PML          | 3.5583     | 3.58972   | 4.79589  | 4.877    | 4.27264   | 4.10063    |
| PMM1         | 2.23727    | 1.84839   | 3.21998  | 3.49342  | 2.96975   | 3.34179    |
| PMM2         | 4.43031    | 4.21596   | 4.15514  | 4.38983  | 4.67586   | 4.38055    |
| PMP22        | 7.53015    | 7.14837   | 4.27524  | 4.41955  | 6.53866   | 6.11609    |
| PMPCA        | 4.92066    | 4.74186   | 4.31304  | 4.51779  | 5.01341   | 4.74305    |
| PMPCB        | 5.20601    | 5.19705   | 4.5909   | 5.0297   | 5.53055   | 5.70167    |
| PMS1         | 4.01173    | 4.07145   | 3.41639  | 3.50588  | 4.37655   | 4.71849    |
| PMS2         | 3.86836    | 3.78246   | 3.95845  | 4.06868  | 3.60798   | 3.56207    |
| PMS2CL       | 2.69913    | 2.55384   | 3.24196  | 3.13877  | 3.03894   | 2.69331    |
| PMS2P1       | 1.10761    | 1.04298   | 0.920194 | 1.18316  | 1.13529   | 1.74959    |
| PMS2P3       | 1.76246    | 1.75893   | 2.02295  | 2.17799  | 1.71949   | 1.2884     |
| PMS2P4       | 0.290436   | 0.0331587 | 0.219339 | 0.474369 | -0.142693 | 0.00947617 |
| PMVK         | 2.65628    | 2.40135   | 1.89865  | 1.99449  | 2.45344   | 2.61523    |
| PNISR        | 5.92202    | 5.89825   | 6.569    | 6.39865  | 7.39639   | 6.62136    |
| PNKD         | 3.59325    | 3.65998   | 3.89862  | 4.378    | 3.67731   | 4.3031     |
| PNKP         | 2.88213    | 2.8455    | 2.96369  | 3.08839  | 3.55521   | 3.44811    |
| PNMA1        | 2.60699    | 2.19895   | 2.83885  | 2.82192  | 3.59235   | 2.85554    |
| PNMA2        | ?          | -6.45019  | 3.19369  | 3.53684  | -2.02922  | -2.28115   |
| PNMAL1       | -6.68418 ? |           | -4.18092 | -3.30006 | 2.49706   | 2.56008    |
| PNN          | 6.57377    | 6.54661   | 5.71808  | 5.77495  | 6.57489   | 5.74397    |
| PNO1         | 4.02975    | 4.05475   | 3.26765  | 3.83665  | 4.25549   | 4.62994    |
| PNP          | 2.23463    | 2.41675   | 2.93283  | 3.58466  | 4.10868   | 4.9506     |
| PNPLA2       | 2.94298    | 2.67159   | 3.48536  | 3.63923  | 2.94518   | 2.77307    |
| PNPLA3       | 3.21246    | 3.13578   | 3.26173  | 3.59186  | -6.64581  | -5.6744    |
| PNPLA6       | 4.13578    | 4.06851   | 3.92467  | 4.0978   | 4.71244   | 5.06704    |
| PNPLA8       | 4.56094    | 4.73259   | 4.12513  | 4.53759  | 4.88918   | 5.83501    |
| PNPO         | 3.92113    | 3.8156    | 3.22587  | 3.76461  | 4.36537   | 4.65194    |
| PNPT1        | 5.0591     | 5.10252   | 4.10746  | 4.50504  | 5.16561   | 5.30705    |
| PNPT1P1      | 1.84034    | 1.9654    | 0.937103 | 1.25669  | 2.13575   | 1.71412    |
| PNRC1        | 4.35958    | 3.88809   | 3.95218  | 3.9892   | 4.39294   | 4.08607    |
| PNRC2        | 6.12232    | 6.14284   | 5.12172  | 5.31163  | 6.06739   | 6.38177    |
| POC1A        | 3.50916    | 3.53152   | 3.13615  | 3.63431  | 3.36482   | 3.51487    |
| POC1B        | 3.27041    | 3.60692   | 3.1405   | 3.36669  | 2.69255   | 3.29384    |
| POC1B-GALNT4 | 0.983773   | 1.29821   | 0.594147 | 1.34253  | -0.262654 | 0.509858   |
| POC5         | 2.77868    | 2.85231   | 3.17623  | 3.48364  | 2.91145   | 3.51003    |
| PODXL        | 9.92316    | 10.0103   | 3.1541   | 3.47237  | 5.42615   | 5.17821    |
| PODXL2       | 3.94296    | 3.89581   | -6.17309 | -6.09892 | -2.13612  | -4.70296   |
| POFUT1       | 7.15215    | 7.19578   | 6.73848  | 7.07803  | 6.43344   | 6.39295    |
| POFUT2       | 3.66833    | 3.56645   | 5.33757  | 5.46198  | 4.75332   | 4.3634     |
| POGK         | 6.26375    | 6.38262   | 4.68298  | 5.09389  | 5.43768   | 5.64312    |
| POGLUT1      | 3.76444    | 3.95606   | 4.18934  | 4.66018  | 3.97085   | 4.39788    |
| POGZ         | 5.59928    | 5.37319   | 5.02836  | 4.75922  | 5.36965   | 4.70901    |
| POLA1        | 4.6535     | 4.62988   | 5.05488  | 5.19437  | 4.67509   | 4.72998    |
| POLA2        | 5.04112    | 5.04841   | 4.21735  | 4.43999  | 3.16306   | 2.95507    |
| POLB         | 2.60927    | 2.82718   | 2.35177  | 2.65605  | 2.50963   | 3.20318    |
| POLD1        | 3.39631    | 2.9423    | 2.92762  | 3.19724  | 3.28221   | 3.27913    |

|         |         |         |          |         |         |         |
|---------|---------|---------|----------|---------|---------|---------|
| POLD2   | 5.17204 | 5.04939 | 5.35804  | 5.71014 | 5.5724  | 5.76849 |
| POLD3   | 4.63965 | 4.60122 | 5.00321  | 5.06797 | 3.86128 | 3.60843 |
| POLD4   | 2.96795 | 2.87417 | 2.97141  | 3.27006 | 3.02553 | 3.42417 |
| POLDIP2 | 4.88537 | 4.81675 | 4.88794  | 5.35263 | 6.17662 | 6.26445 |
| POLDIP3 | 5.32188 | 5.392   | 4.81294  | 4.99837 | 5.08071 | 5.13563 |
| POLE    | 6.21248 | 5.99351 | 5.63423  | 5.56137 | 4.97993 | 4.38472 |
| POLE2   | 2.34259 | 2.29539 | 1.34008  | 1.55654 | 2.0086  | 2.26485 |
| POLE3   | 5.36176 | 5.33117 | 4.52273  | 5.05357 | 5.39784 | 5.70741 |
| POLE4   | 2.78676 | 2.69451 | 0.674533 | 1.39106 | 3.97359 | 4.94612 |
| POLG    | 4.77049 | 4.59868 | 4.54366  | 4.56804 | 4.40381 | 4.06754 |
| POLG2   | 3.07736 | 3.14264 | 2.76193  | 2.73353 | 3.54671 | 3.24749 |
| POLH    | 3.24637 | 3.53151 | 3.48358  | 3.80258 | 4.08366 | 4.05981 |
| POLI    | 3.852   | 3.73751 | 3.81228  | 3.68939 | 2.80322 | 2.45158 |
| POLK    | 4.24442 | 4.32668 | 5.15465  | 5.28294 | 4.78075 | 5.11026 |
| POLL    | 2.87887 | 2.89175 | 3.01021  | 3.25567 | 3.54473 | 3.25607 |
| POLM    | 3.1759  | 2.8881  | 2.9839   | 2.87417 | 2.80526 | 2.29893 |
| POLQ    | 5.43209 | 5.53434 | 5.8636   | 5.94164 | 4.98574 | 4.86976 |
| POLR1A  | 6.04365 | 6.04197 | 5.38013  | 5.59462 | 5.88924 | 5.41158 |
| POLR1B  | 6.02499 | 6.09726 | 4.03927  | 4.3506  | 6.12615 | 6.13995 |
| POLR1C  | 3.54691 | 3.67315 | 2.70073  | 3.09304 | 4.00989 | 4.34123 |
| POLR1D  | 4.53633 | 4.38577 | 4.01614  | 4.14383 | 4.72877 | 5.01438 |
| POLR1E  | 4.1843  | 4.34932 | 3.48713  | 3.91769 | 5.64406 | 5.68452 |
| POLR2A  | 5.42856 | 5.6548  | 5.80018  | 6.21365 | 5.76544 | 6.10667 |
| POLR2B  | 6.41214 | 6.34634 | 5.77232  | 6.20051 | 7.9845  | 8.26363 |
| POLR2C  | 4.70818 | 4.877   | 4.72996  | 5.35563 | 6.28148 | 6.83146 |
| POLR2D  | 5.32606 | 5.47046 | 4.49331  | 4.80181 | 5.84806 | 6.04482 |
| POLR2E  | 4.59392 | 4.32178 | 4.36722  | 4.65928 | 5.31981 | 5.41286 |
| POLR2F  | 4.53974 | 4.45325 | 2.96685  | 3.37363 | 3.66242 | 3.89701 |
| POLR2G  | 4.20254 | 4.21134 | 3.66667  | 4.01011 | 4.19689 | 4.88853 |
| POLR2H  | 4.41205 | 4.40134 | 4.1214   | 4.46197 | 5.63574 | 6.16748 |
| POLR2I  | 2.16427 | 2.21048 | 1.97205  | 2.411   | 2.83953 | 3.11489 |
| POLR2J  | 4.20634 | 4.04089 | 3.33544  | 3.76434 | 4.17637 | 4.7159  |
| POLR2J2 | 2.20409 | 2.12771 | 3.26752  | 3.19261 | 2.04421 | 1.48344 |
| POLR2J3 | 5.07268 | 4.91711 | 5.45824  | 5.35198 | 5.37352 | 4.57628 |
| POLR2J4 | 2.56759 | 2.59611 | 2.94848  | 2.771   | 2.65656 | 2.24028 |
| POLR2K  | 4.39368 | 4.47525 | 3.606    | 4.15092 | 5.0891  | 6.09337 |
| POLR2L  | 4.61827 | 4.32817 | 4.44698  | 4.70963 | 4.29265 | 4.6965  |
| POLR2M  | 4.12711 | 4.37288 | 3.92226  | 4.55509 | 4.75578 | 5.25773 |
| POLR3A  | 4.9883  | 4.82774 | 4.27385  | 4.3669  | 5.5748  | 5.32463 |
| POLR3B  | 3.78168 | 3.88469 | 2.82771  | 3.27048 | 3.18674 | 3.33209 |
| POLR3C  | 3.78776 | 3.88033 | 3.15187  | 3.66595 | 3.97633 | 4.34721 |
| POLR3D  | 4.80822 | 4.78863 | 3.92238  | 4.27054 | 4.51211 | 4.22697 |
| POLR3E  | 4.51097 | 4.57194 | 3.89995  | 4.29098 | 4.14623 | 4.16211 |
| POLR3F  | 3.82831 | 4.03898 | 2.82772  | 3.3258  | 2.95441 | 3.28481 |
| POLR3G  | 3.52716 | 4.13948 | 2.92274  | 3.49851 | 4.21235 | 4.55518 |
| POLR3GL | 1.88966 | 1.91222 | 2.71433  | 2.97066 | 2.49198 | 2.75682 |
| POLR3H  | 5.10407 | 5.02    | 4.39861  | 4.60182 | 4.80974 | 4.77944 |
| POLR3K  | 1.73035 | 1.58126 | 1.87079  | 2.47152 | 2.58832 | 2.38059 |
| POLRMT  | 3.27212 | 3.31424 | 2.64823  | 2.8705  | 3.79651 | 3.86598 |
| POLRMT1 | 2.00913 | 2.05091 | 1.25239  | 1.59935 | 2.34651 | 2.08341 |
| POM121  | 4.64962 | 4.35563 | 4.9418   | 4.69    | 4.88072 | 4.50978 |
| POM121C | 4.78124 | 4.55617 | 4.67958  | 4.38695 | 4.62736 | 4.3479  |

|           |           |           |            |            |            |           |
|-----------|-----------|-----------|------------|------------|------------|-----------|
| POM121L9P | -3.50674  | -3.42223  | 1.58485    | 1.93174    | -5.65305 ? |           |
| POMGNT1   | 5.56077   | 5.69389   | 5.60724    | 5.96232    | 5.62922    | 6.32089   |
| POMGNT2   | 4.24708   | 4.22976   | 2.72338    | 3.0611     | 3.82553    | 3.84017   |
| POMK      | 4.8976    | 5.21925   | 3.32229    | 3.6494     | 3.88658    | 3.72583   |
| POMP      | 5.34184   | 5.55816   | 4.96746    | 5.62165    | 5.24464    | 6.32976   |
| POMT1     | 3.57704   | 3.37793   | 3.26769    | 3.27272    | 3.9086     | 3.2677    |
| POMT2     | 4.03478   | 3.78981   | 3.35176    | 3.21761    | 4.01476    | 3.66832   |
| POMZP3    | 2.10251   | 1.90266   | 1.77122    | 1.998      | 1.35413    | 1.30634   |
| PON2      | 5.38447   | 5.51651   | 5.47401    | 5.7525     | 5.35553    | 6.12674   |
| POP1      | 4.33638   | 4.4175    | 4.31332    | 4.70895    | 4.57749    | 4.91716   |
| POP4      | 3.24783   | 3.30203   | 3.69606    | 4.18694    | 4.27778    | 4.89783   |
| POP5      | 3.33159   | 3.41213   | 2.72638    | 3.17195    | 3.29824    | 3.93353   |
| POP7      | 3.94206   | 3.79454   | 2.76777    | 3.1248     | 3.81542    | 4.07955   |
| POPDC3    | 2.97688   | 2.66387   | 2.04532    | 2.56714    | 4.9599     | 5.56005   |
| POR       | 4.85886   | 4.75086   | 4.79304    | 5.18866    | 5.01651    | 5.06806   |
| PORCN     | 1.95199   | 2.55119   | 1.0162     | 1.96801    | 1.04018    | 1.54125   |
| POSTN     | 1.82451   | 1.38894   | 2.93023    | 0.935626   | -0.490197  | -2.38405  |
| POT1      | 3.93482   | 3.91869   | 3.85539    | 4.11517    | 3.7847     | 4.30171   |
| POTEE     | 2.41797   | 2.42939   | 2.85254    | 3.03912    | 3.39269    | 3.24828   |
| POU2F1    | 5.94068   | 5.83894   | 4.95473    | 4.85477    | 4.96492    | 4.14348   |
| POU3F2    | 4.30934   | 4.26336   | -3.59683   | -5.10387   | 5.68425    | 5.3363    |
| POU3F3    | -0.144345 | -0.105152 | -6.17309 ? |            | 3.07271    | 2.66398   |
| POU5F2    | 2.12991   | 2.24453   | 2.15189    | 2.02562    | 2.06403    | 1.39136   |
| PP7080    | 2.52905   | 2.5821    | 2.28693    | 2.48849    | 2.24635    | 2.07646   |
| PPA1      | 5.0667    | 5.18616   | 4.2667     | 4.93798    | 5.55157    | 6.00935   |
| PPA2      | 4.0143    | 4.1656    | 3.50823    | 3.78751    | 3.8914     | 5.22253   |
| PPAN      | 3.56177   | 3.37951   | 2.12483    | 2.5494     | 4.11612    | 3.84787   |
| PPAP2A    | 1.89156   | 2.12294   | 5.64849    | 5.59109    | 3.68032    | 3.92816   |
| PPAP2B    | 3.88681   | 3.64568   | 2.9406     | 3.28134    | 0.82357    | 1.87074   |
| PPAP2C    | 4.58978   | 4.7405    | 4.04409    | 4.46197    | 5.22576    | 5.4341    |
| PPAPDC1A  | 2.643     | 2.69703   | 0.156448   | 1.06115    | 2.04362    | 3.03812   |
| PPAPDC1B  | 2.84396   | 3.00068   | 3.44766    | 3.87273    | 2.79708    | 2.86315   |
| PPAPDC2   | 2.14324   | 2.26509   | 0.956168   | 1.01017    | 3.5637     | 3.71745   |
| PPARA     | 3.78775   | 3.52726   | 4.89128    | 5.0075     | 4.02968    | 3.63536   |
| PPARD     | 2.30937   | 2.041     | 3.11798    | 3.393      | 4.4145     | 4.13563   |
| PPARG     | 3.98741   | 4.18551   | -2.18288   | -2.10822 ? |            | -4.11926  |
| PPARGC1A  | -4.37417  | -5.45651  | 2.77359    | 3.23325    | 3.10622    | 3.42257   |
| PPARGC1B  | 2.30375   | 2.12589   | 2.84991    | 3.1603     | 2.08454    | 1.87074   |
| PPAT      | 4.75821   | 4.83944   | 3.96403    | 4.32421    | 6.46882    | 6.48553   |
| PPATP1    | 1.41384   | 1.36007   | 0.0992952  | 0.898433   | 3.09058    | 3.1644    |
| PPCDC     | 1.96272   | 1.95503   | 2.36724    | 2.46861    | 2.03668    | 2.00067   |
| PPCS      | 3.27937   | 3.2824    | 3.29053    | 3.54813    | 3.16688    | 4.0011    |
| PPDPF     | 1.7314    | 1.55956   | 1.41643    | 1.37503    | 1.4996     | 1.72795   |
| PPFIA1    | 5.5168    | 5.65275   | 5.07288    | 5.34422    | 5.05413    | 5.03952   |
| PPFIA2    | -2.1899   | -1.81849  | -7.52086   | -6.09892   | 0.654023   | 2.08334   |
| PPFIA3    | 1.43024   | 0.877069  | 1.12031    | 1.13916    | -0.217212  | -0.280287 |
| PPFIA4    | 1.06916   | 1.13712   | 1.11115    | 0.659441   | 3.05394    | 0.0747657 |
| PPFIBP1   | 6.69802   | 6.61272   | 5.20495    | 5.41277    | 5.80528    | 5.49949   |
| PPFIBP2   | 3.08229   | 3.06854   | -1.37581   | -0.823182  | -0.932127  | -0.706491 |
| PPHLN1    | 5.34258   | 5.3733    | 4.75762    | 4.91009    | 4.73629    | 4.75991   |
| PPIA      | 8.41128   | 8.40467   | 8.347      | 8.70662    | 8.75021    | 9.11559   |
| PPIAP22   | 7.83386   | 7.78387   | 7.80742    | 8.12728    | 8.02888    | 8.48836   |

|            |           |             |          |          |           |          |
|------------|-----------|-------------|----------|----------|-----------|----------|
| PPIAP29    | 3.8631    | 4.04369     | 3.94863  | 4.38602  | 4.49494   | 4.59901  |
| PPIAP31    | 4.83951   | 4.72068     | 4.83765  | 5.01976  | 4.95775   | 5.67712  |
| PPIB       | 8.24087   | 7.91075     | 7.46759  | 7.7445   | 7.53174   | 7.88045  |
| PPIC       | 4.21666   | 4.18055     | 4.12534  | 4.35974  | 3.87099   | 4.07942  |
| PPID       | 3.81684   | 3.86012     | 3.38885  | 3.57483  | 4.13424   | 4.10363  |
| PPIE       | 4.17298   | 4.25276     | 3.4942   | 3.87274  | 4.29896   | 4.74861  |
| PPIF       | 5.40092   | 5.08789     | 5.24273  | 5.70455  | 6.18499   | 6.06971  |
| PPIG       | 5.75518   | 5.83033     | 5.25733  | 5.45246  | 5.91498   | 5.99283  |
| PPIH       | 2.94658   | 3.07438     | 2.63027  | 3.09085  | 3.08284   | 3.61295  |
| PPIHP1     | 0.77894   | 0.83556     | 1.08969  | 1.25414  | 1.21013   | 1.54635  |
| PPIL1      | 4.35753   | 4.18729     | 3.73384  | 4.12838  | 4.88273   | 5.33903  |
| PPIL2      | 4.55424   | 4.53662     | 4.15181  | 4.07144  | 4.14867   | 3.95705  |
| PPIL3      | 2.27822   | 2.36372     | 2.30031  | 2.42257  | 3.08956   | 3.77104  |
| PPIL4      | 3.93754   | 3.91978     | 3.86359  | 3.9586   | 4.4696    | 4.7016   |
| PPIP5K1    | 3.95721   | 4.04359     | 3.45845  | 3.65738  | 4.01173   | 3.91279  |
| PPIP5K2    | 5.31632   | 5.76798     | 5.39254  | 5.90209  | 5.37582   | 6.35001  |
| PPL        | 0.312247  | -0.0197685  | 1.5847   | 2.40294  | -1.16815  | -1.4584  |
| PPM1A      | 5.09776   | 5.28491     | 4.0891   | 4.21084  | 4.65596   | 4.7951   |
| PPM1B      | 4.31109   | 4.31283     | 4.30231  | 4.39995  | 4.67471   | 4.39657  |
| PPM1D      | 3.81564   | 3.90675     | 3.05727  | 3.24432  | 3.68731   | 3.82855  |
| PPM1E      | 3.04659   | 2.77591     | 0.285923 | 0.682969 | 0.699738  | 0.772156 |
| PPM1F      | 5.71272   | 5.5795      | 4.53291  | 4.91656  | 4.73885   | 4.85226  |
| PPM1G      | 6.72719   | 6.67582     | 5.39907  | 5.59762  | 7.09377   | 6.65635  |
| PPM1H      | 1.48583   | 1.41371     | 1.40148  | 1.85699  | -2.26731  | -2.53597 |
| PPM1K      | 3.36701   | 3.31523     | 3.75605  | 3.70975  | 3.77536   | 3.5003   |
| PPM1L      | 2.42506   | 2.10703     | 3.20018  | 2.97599  | -0.615709 | -1.24695 |
| PPM1M      | 2.70607   | 2.67415     | 2.64938  | 2.74605  | 2.69505   | 2.95863  |
| PPME1      | 5.20187   | 4.98864     | 5.29262  | 5.31756  | 5.07794   | 4.57942  |
| PPOX       | 2.63823   | 2.56844     | 2.19178  | 2.35405  | 2.36419   | 2.34701  |
| PPP1CA     | 5.98207   | 5.94461     | 5.24973  | 5.4993   | 5.78178   | 6.01481  |
| PPP1CB     | 6.79397   | 6.93529     | 6.08561  | 6.53924  | 8.36035   | 8.68214  |
| PPP1CC     | 6.61521   | 6.51279     | 5.71506  | 6.08191  | 6.54836   | 6.65578  |
| PPP1R10    | 4.98828   | 4.92301     | 4.98952  | 5.19209  | 5.33475   | 5.24965  |
| PPP1R11    | 3.6251    | 3.60718     | 3.20439  | 3.71747  | 4.60808   | 5.12368  |
| PPP1R12A   | 5.71763   | 5.86285     | 5.70677  | 5.85517  | 6.39865   | 6.24935  |
| PPP1R12B   | 4.68145   | 4.65391     | 4.70661  | 4.61869  | 3.91196   | 3.38435  |
| PPP1R12C   | 3.51888   | 3.20249     | 3.78514  | 4.09696  | 4.14462   | 4.38471  |
| PPP1R13B   | 2.28678   | 1.99661     | 1.34008  | 1.30061  | 1.27048   | 1.1637   |
| PPP1R13L   | 0.409538  | 0.195474    | 0.503064 | 0.248838 | 2.42716   | 1.63317  |
| PPP1R14B   | 5.27544   | 5.13669     | 3.68715  | 3.84485  | 5.00043   | 5.11908  |
| PPP1R14BP3 | 5.12011   | 5.13788     | 3.5508   | 3.87324  | 4.99578   | 4.78306  |
| PPP1R14C   | 2.643     | 2.75633     | -5.1783  | -6.09892 | 3.10622   | 2.68131  |
| PPP1R15A   | 4.03901   | 3.90128     | 4.0644   | 4.64939  | 3.54914   | 3.22403  |
| PPP1R15B   | 6.66586   | 6.69638     | 6.08881  | 6.31533  | 6.78275   | 6.90844  |
| PPP1R16A   | 1.8042    | 1.65697     | 2.05036  | 2.4556   | 2.77284   | 2.80191  |
| PPP1R17    | -0.569597 | -0.375208 ? | ?        |          | 1.80732   | 1.12623  |
| PPP1R18    | 4.95598   | 4.8602      | 5.1652   | 5.3169   | 5.39496   | 5.49418  |
| PPP1R2     | 4.11338   | 4.24729     | 4.87215  | 5.2155   | 5.29491   | 5.35851  |
| PPP1R21    | 2.51525   | 2.58429     | 2.6109   | 2.86846  | 3.17889   | 3.77104  |
| PPP1R26    | 1.77668   | 1.74664     | 3.64302  | 3.92183  | 2.59944   | 2.64644  |
| PPP1R2P3   | 0.426447  | 0.927517    | 1.35864  | 1.81427  | 1.89861   | 2.69951  |
| PPP1R35    | 2.30994   | 2.37637     | 2.02836  | 2.18086  | 2.50996   | 2.69633  |

|            |          |           |           |            |          |           |
|------------|----------|-----------|-----------|------------|----------|-----------|
| PPP1R37    | 2.71878  | 2.56231   | 3.0235    | 3.26404    | 3.20543  | 3.30172   |
| PPP1R3B    | 2.98772  | 3.16443   | 2.10445   | 2.52566    | 2.83559  | 2.67995   |
| PPP1R3C    | 1.49572  | 1.27191   | 1.24279   | 1.36695    | 3.94701  | 3.33221   |
| PPP1R3D    | 2.91161  | 2.84899   | 1.96438   | 2.16587    | 2.45468  | 2.42035   |
| PPP1R3E    | 1.43438  | 1.61209   | 1.44587   | 1.20285    | 1.20393  | 0.815379  |
| PPP1R3F    | 2.18052  | 2.26168   | 1.29226   | 1.57069    | -1.95932 | -1.79933  |
| PPP1R3G    | -2.52833 | -2.87684  | -1.93506  | -1.86039   | 1.76178  | 1.58794   |
| PPP1R7     | 3.58097  | 3.65782   | 3.5324    | 3.99423    | 4.31948  | 4.92075   |
| PPP1R8     | 4.94342  | 5.0022    | 3.76191   | 4.23989    | 4.97492  | 5.20017   |
| PPP1R8P1   | 0.944836 | 0.955067  | -0.935332 | -1.30113   | 0.186095 | -0.280287 |
| PPP1R9A    | 4.74799  | 4.48186   | -3.85951  | -2.64851   | 5.88803  | 5.85647   |
| PPP1R9B    | 5.25472  | 5.15553   | 4.46301   | 4.72326    | 5.11612  | 4.81782   |
| PPP2CA     | 6.35574  | 6.39223   | 6.19346   | 6.63337    | 6.87865  | 7.03126   |
| PPP2CB     | 4.25581  | 4.40133   | 3.61252   | 4.11034    | 4.77223  | 4.94782   |
| PPP2R1A    | 5.83567  | 5.65118   | 5.53746   | 5.79241    | 6.5917   | 6.46256   |
| PPP2R1B    | 3.94597  | 4.09682   | 4.75466   | 4.99974    | 5.10009  | 4.99381   |
| PPP2R2A    | 4.54765  | 4.62858   | 4.32427   | 4.44575    | 4.53567  | 4.58905   |
| PPP2R2B    | 1.02208  | 1.06077   | 3.35951   | 3.57942    | 4.23374  | 4.74963   |
| PPP2R2D    | 3.6251   | 3.54138   | 3.89195   | 4.13909    | 4.20154  | 4.1698    |
| PPP2R3A    | 3.43277  | 3.46937   | 3.32823   | 3.2399     | 4.54425  | 4.57984   |
| PPP2R3B    | 2.2198   | 2.1408    | 2.50299   | 2.52418    | 0.448309 | 0.463298  |
| PPP2R3C    | 2.85153  | 2.91581   | 2.49123   | 2.76308    | 3.22205  | 4.10679   |
| PPP2R4     | 5.20027  | 5.12257   | 4.81011   | 5.08469    | 6.11571  | 6.44238   |
| PPP2R5A    | 3.40945  | 3.35574   | 3.21308   | 3.30057    | 3.3909   | 3.46571   |
| PPP2R5B    | 2.52735  | 2.51158   | 2.18282   | 2.52418    | 2.54672  | 1.99375   |
| PPP2R5C    | 5.39854  | 5.28694   | 4.67862   | 4.76609    | 5.69897  | 5.77792   |
| PPP2R5D    | 4.64546  | 4.62765   | 4.3067    | 4.51727    | 5.11946  | 4.849     |
| PPP2R5E    | 4.78756  | 4.78544   | 4.0061    | 4.1379     | 4.45829  | 4.51221   |
| PPP3CA     | 4.12905  | 3.91978   | 5.4693    | 5.63138    | 4.49196  | 4.14659   |
| PPP3CB     | 4.04575  | 4.10415   | 3.17183   | 3.39698    | 4.95025  | 4.98415   |
| PPP3CB-AS1 | 0.728748 | 0.804211  | 1.38361   | 1.36213    | 1.32843  | 1.28379   |
| PPP3CC     | 2.54784  | 2.67923   | 1.82299   | 2.08115    | 2.48019  | 2.68896   |
| PPP3R1     | 4.9209   | 4.95361   | 4.4828    | 4.67548    | 5.0487   | 5.2566    |
| PPP4C      | 4.8755   | 4.73988   | 4.54439   | 4.77228    | 5.1062   | 5.33219   |
| PPP4R1     | 4.63631  | 4.60793   | 5.72335   | 5.98326    | 6.61667  | 6.65247   |
| PPP4R1L    | 3.10505  | 3.27017   | 0.474784  | 0.19507    | 1.17894  | 0.893261  |
| PPP4R2     | 6.09269  | 6.24792   | 5.68771   | 5.83984    | 5.81114  | 5.87092   |
| PPP4R3A    | 5.20254  | 5.2315    | 4.3624    | 4.50034    | 5.48466  | 5.36071   |
| PPP4R3B    | 5.75081  | 5.84812   | 5.47717   | 5.7591     | 6.20009  | 6.53778   |
| PPP4R3CP   | 2.42247  | 2.28872 ? |           | -6.09892 ? |          | -4.70296  |
| PPP4R4     | 2.5441   | 2.95922   | -1.37581  | -1.25052   | -5.65305 | -5.69922  |
| PPP5C      | 4.87504  | 4.81734   | 4.39296   | 4.52598    | 5.0196   | 4.89598   |
| PPP6C      | 4.74129  | 4.7809    | 4.47913   | 5.03068    | 5.32048  | 5.49847   |
| PPP6R1     | 4.74814  | 4.48006   | 4.59711   | 4.76509    | 5.09772  | 5.08621   |
| PPP6R2     | 4.24416  | 4.0602    | 5.16273   | 5.22965    | 4.2738   | 4.40442   |
| PPP6R3     | 6.9796   | 6.89986   | 6.77967   | 6.92381    | 6.39949  | 6.1012    |
| PPRC1      | 4.78069  | 4.75087   | 4.51692   | 4.70974    | 4.85883  | 4.5293    |
| PPT1       | 6.78169  | 6.93128   | 6.44197   | 6.83457    | 6.90105  | 7.45517   |
| PPT2       | 4.4997   | 4.36739   | 3.13204   | 3.36905    | 3.89961  | 3.87948   |
| PPT2-EGFL8 | 1.67559  | 1.5514    | 1.34369   | 1.39877    | 1.87554  | 1.21079   |
| PPTC7      | 4.12429  | 4.14541   | 3.06915   | 3.53142    | 3.84052  | 3.73      |
| PPWD1      | 3.96625  | 3.99453   | 4.48536   | 4.60111    | 4.28951  | 4.53049   |

|              |           |          |          |            |           |           |
|--------------|-----------|----------|----------|------------|-----------|-----------|
| PQBP1        | 3.95286   | 4.06267  | 3.42566  | 4.00361    | 3.5637    | 3.87824   |
| PQLC1        | 3.18357   | 2.87701  | 2.63027  | 2.786      | 1.66165   | 2.16367   |
| PQLC2        | 2.80276   | 2.44706  | 3.08794  | 3.31113    | 3.20543   | 2.89321   |
| PQLC3        | 0.595628  | 0.988427 | 1.46038  | 1.79207    | 1.02625   | 2.16983   |
| PRADC1       | 2.41689   | 2.38221  | 2.48892  | 2.90799    | 2.98503   | 3.64201   |
| PRAF2        | 1.82451   | 1.87703  | 2.43488  | 2.66117    | 1.83157   | 2.07467   |
| PRC1         | 7.11023   | 7.15498  | 6.80797  | 7.28353    | 6.87855   | 6.88998   |
| PRC1-AS1     | 0.74719   | 0.442068 | 0.783423 | 0.719674   | -0.366868 | -2.74829  |
| PRCC         | 4.33709   | 4.19625  | 3.68684  | 3.83954    | 4.22461   | 4.17898   |
| PRCP         | 5.05538   | 4.90564  | 5.7181   | 5.89117    | 4.62968   | 4.69415   |
| PRDM1        | 0.0559314 | 0.635262 | 2.96369  | 2.92185    | 2.97087   | 2.15129   |
| PRDM10       | 3.58864   | 3.71582  | 3.14516  | 3.19267    | 3.50585   | 3.20018   |
| PRDM11       | 2.15892   | 1.93806  | 1.5913   | 1.71138    | 0.405873  | 0.483199  |
| PRDM15       | 3.61267   | 3.44404  | 3.4275   | 3.41865    | 3.38681   | 2.82468   |
| PRDM2        | 3.8284    | 3.69955  | 4.4033   | 4.10792    | 4.39499   | 4.05815   |
| PRDM4        | 4.33402   | 4.26838  | 3.62563  | 3.83794    | 4.47068   | 4.53455   |
| PRDM5        | 3.24344   | 2.9122   | 1.31637  | 1.31748    | 2.87303   | 2.6899    |
| PRDM6        | -0.998365 | -1.93875 | 1.42385  | 1.91042    | -1.07506  | -0.348991 |
| PRDX1        | 7.15697   | 7.07415  | 8.57808  | 8.9507     | 9.00624   | 9.44356   |
| PRDX1P1      | 2.22938   | 2.34814  | 3.77961  | 4.23332    | 4.3605    | 4.12668   |
| PRDX2        | 5.30999   | 5.19758  | 4.36914  | 4.53772    | 6.09682   | 6.12577   |
| PRDX3        | 5.97775   | 6.15026  | 5.64739  | 6.2648     | 6.54635   | 7.37725   |
| PRDX3P1      | 0.323393  | 0.656176 | 0.371169 | 0.833756   | 0.395063  | 0.817263  |
| PRDX4        | 4.91059   | 4.81211  | 4.97257  | 5.35824    | 5.10459   | 5.85028   |
| PRDX5        | 5.4494    | 5.37199  | 4.13614  | 4.66265    | 4.78626   | 5.62644   |
| PRDX6        | 6.68548   | 6.92914  | 6.10789  | 6.75805    | 6.32246   | 6.89688   |
| PREB         | 4.81168   | 4.63254  | 3.92238  | 4.17541    | 4.79398   | 4.85647   |
| PRELID1      | 5.44238   | 5.39335  | 4.99825  | 5.50973    | 6.52537   | 6.8552    |
| PRELID1P1    | 1.00018   | 1.23484  | 0.635987 | 1.35604    | 2.14072   | 2.45998   |
| PRELID2      | 1.39899   | 1.58158  | 2.74426  | 3.0686     | 2.94147   | 2.93354   |
| PREP         | 4.38506   | 4.19804  | 3.33415  | 3.39897    | 5.54364   | 5.41546   |
| PREPL        | 5.17343   | 5.26658  | 4.9345   | 5.26122    | 5.44485   | 5.61367   |
| PREX1        | 5.5426    | 5.55636  | 3.70521  | 4.58205    | 3.85736   | 4.50394   |
| PRICKLE1     | 0.821457  | 1.16613  | 0.978393 | 0.497556   | 5.49731   | 4.83921   |
| PRICKLE2     | 3.78857   | 3.67924  | 4.66552  | 4.57463    | 4.96386   | 4.84612   |
| PRICKLE2-AS1 | -0.212203 | 0.117083 | 1.13738  | 0.986695   | 0.265605  | 0.213553  |
| PRICKLE3     | 0.440559  | 0.382745 | 0.686917 | 1.1104     | 0.172692  | -0.31423  |
| PRICKLE4     | 1.1901    | 1.37035  | 1.72162  | 1.82296    | 0.985799  | 0.72772   |
| PRIM1        | 2.90704   | 3.05483  | 3.38667  | 3.61144    | 2.93814   | 3.58739   |
| PRIM2        | 4.1651    | 4.44555  | 4.25005  | 4.53682    | 4.35021   | 4.96923   |
| PRIMA1       | 1.98043   | 1.96763  | -5.1783  | -6.09892 ? | ?         |           |
| PRIMPOL      | 2.50374   | 2.44294  | 2.89096  | 3.0976     | 1.86511   | 2.46743   |
| PRKAA1       | 5.15888   | 5.54907  | 5.50341  | 5.97531    | 5.76987   | 5.99978   |
| PRKAA2       | 4.24855   | 4.38185  | 0.64945  | 1.1104     | 5.24808   | 5.08524   |
| PRKAB1       | 3.51646   | 3.39358  | 2.6109   | 2.92735    | 3.29969   | 3.35668   |
| PRKAB2       | 4.84925   | 4.7362   | 4.10533  | 4.25201    | 5.59971   | 5.63813   |
| PRKACA       | 2.63408   | 2.15556  | 2.94319  | 2.786      | 3.37174   | 3.02452   |
| PRKACB       | 4.64519   | 4.69195  | 4.52556  | 4.95052    | 5.01519   | 5.36607   |
| PRKAG1       | 4.73818   | 4.79584  | 3.7005   | 4.14668    | 4.71762   | 5.41911   |
| PRKAG2       | 2.97511   | 3.0068   | 2.73236  | 3.26186    | 4.91428   | 5.13798   |
| PRKAR1A      | 7.14355   | 6.96419  | 6.46002  | 6.86856    | 7.18208   | 7.11405   |
| PRKAR1B      | 1.46083   | 1.78551  | 1.22592  | 1.48367    | 2.31993   | 2.54122   |



|           |           |             |           |           |          |           |
|-----------|-----------|-------------|-----------|-----------|----------|-----------|
| PRKAR2A   | 5.59467   | 5.55083     | 5.1729    | 5.40834   | 6.81418  | 6.76852   |
| PRKAR2B   | 3.86793   | 4.25226     | 3.59947   | 4.14855   | 2.18206  | 2.15129   |
| PRKCA     | 2.5536    | 2.46198     | 5.45446   | 5.48268   | 6.13795  | 5.23799   |
| PRKCA-AS1 | -0.026521 | 0.344613    | 1.91453   | 1.71138   | 0.894341 | 0.0483059 |
| PRKCD     | 4.18816   | 3.95922     | 2.28002   | 2.4799    | 0.185296 | 0.422664  |
| PRKCDBP   | 4.16741   | 4.31524     | -0.539469 | 0.591699  | 0.210164 | 1.3157    |
| PRKCE     | 3.24197   | 3.27017     | 3.5444    | 3.86845   | 3.68176  | 3.67483   |
| PRKCH     | 1.14018   | 0.766044    | -2.72315  | -0.836981 | 2.85143  | 3.17593   |
| PRKCI     | 4.43049   | 4.74137     | 5.13516   | 5.51059   | 4.76297  | 4.84022   |
| PRKCSH    | 6.13874   | 6.03575     | 6.1685    | 6.26865   | 6.79822  | 6.43794   |
| PRKD1     | 3.15735   | 2.85004     | 1.88887   | 1.96801   | 3.65029  | 3.72583   |
| PRKD2     | 2.1083    | 1.71211     | 2.92239   | 3.05357   | 3.05394  | 2.64644   |
| PRKD3     | 6.28533   | 6.39395     | 5.66409   | 5.78827   | 5.40723  | 5.39682   |
| PRKDC     | 9.48477   | 9.51379     | 8.94369   | 9.13817   | 8.54766  | 8.2738    |
| PRKRA     | 3.3562    | 3.35733     | 4.74054   | 4.92665   | 4.07609  | 4.55184   |
| PRKRIP1   | 3.33915   | 3.29288     | 3.60445   | 3.57999   | 3.44196  | 3.04297   |
| PRKRIR    | 5.72768   | 5.99177     | 4.75141   | 5.16108   | 4.73643  | 5.56927   |
| PRKRIRP7  | 2.66669   | 2.83361     | 2.3797    | 2.43657   | 1.85426  | 2.57023   |
| PRKX      | 2.83398   | 2.95051     | 2.8595    | 2.9888    | 2.76685  | 2.29832   |
| PRKY      | -6.66478  | -5.44505    | 3.52641   | 3.32813 ? |          | -5.66892  |
| PRLR      | -1.27248  | -1.50825    | -2.09546  | -0.380732 | 3.35789  | 3.94432   |
| PRMT1     | 5.70763   | 5.57525     | 5.26745   | 5.76701   | 6.20323  | 6.46496   |
| PRMT1P1   | 0.454292  | 0.598156    | 0.963252  | 0.988187  | 1.21239  | 0.649036  |
| PRMT2     | 4.42697   | 4.35573     | 4.63186   | 4.82928   | 4.99431  | 5.0058    |
| PRMT3     | 4.05413   | 4.25054     | 3.3498    | 3.62926   | 3.88658  | 4.24165   |
| PRMT5     | 5.04057   | 5.11338     | 3.80718   | 4.13734   | 4.95733  | 5.23058   |
| PRMT5-AS1 | 0.801531  | 0.825419    | -0.177591 | 0.106844  | 0.465306 | 0.0640827 |
| PRMT6     | 3.93754   | 3.99658     | 2.63985   | 3.00752   | 4.33615  | 4.56474   |
| PRMT7     | 3.4113    | 3.3113      | 3.64498   | 3.96297   | 3.99672  | 3.8534    |
| PRMT9     | 2.94658   | 2.9187      | 2.86905   | 2.97599   | 2.69505  | 3.36475   |
| PRNP      | 7.46681   | 7.55615     | 8.00558   | 8.68018   | 7.2808   | 7.441     |
| PROCA1    | 0.255223  | -0.00328298 | 1.38638   | 1.0909    | 0.134221 | -0.95156  |
| PROCR     | 4.52831   | 4.76803     | 4.4337    | 4.64436   | 3.54824  | 4.87241   |
| PRORSD1P  | 0.377835  | 0.432061    | 0.871828  | 0.761609  | 0.147163 | -0.752286 |
| PROS1     | 2.02199   | 1.95081     | 2.33612   | 1.80409   | 0.107996 | 0.816919  |
| PROSC     | 3.36835   | 3.35253     | 3.36145   | 3.71612   | 3.76175  | 4.07792   |
| PROSER1   | 3.28106   | 3.14634     | 3.1541    | 3.05357   | 2.79913  | 2.70692   |
| PROSER3   | 1.7169    | 1.60744     | 3.25635   | 3.35208   | 2.4849   | 2.40472   |
| PROX1     | 2.52207   | 2.44406     | -6.17309  | -4.10635  | 3.1896   | 3.23873   |
| PRPF18    | 2.93241   | 3.07028     | 2.55073   | 2.85104   | 3.26017  | 3.6638    |
| PRPF19    | 5.46864   | 5.35933     | 4.41452   | 4.81152   | 4.67619  | 4.81683   |
| PRPF3     | 5.30526   | 5.35605     | 4.72839   | 4.87886   | 5.32157  | 4.96933   |
| PRPF31    | 4.37576   | 4.25061     | 4.18794   | 4.48214   | 4.96309  | 4.78968   |
| PRPF38A   | 5.20473   | 5.10262     | 4.95401   | 5.01885   | 5.47356  | 5.22843   |
| PRPF38B   | 5.6598    | 5.62924     | 5.2045    | 5.14501   | 5.59911  | 5.00235   |
| PRPF39    | 4.76651   | 4.65603     | 4.21128   | 4.12703   | 4.5246   | 4.23983   |
| PRPF4     | 5.0542    | 5.14655     | 3.99186   | 4.37795   | 5.30747  | 5.27913   |
| PRPF40A   | 6.58762   | 6.62875     | 6.36961   | 6.57985   | 6.72177  | 7.11805   |
| PRPF40B   | 2.7956    | 2.77047     | 2.58407   | 2.71352   | 1.40381  | 1.32331   |
| PRPF4B    | 6.37128   | 6.35877     | 6.22897   | 6.16813   | 6.90814  | 6.71194   |
| PRPF6     | 6.14326   | 6.18662     | 5.16187   | 5.56756   | 6.21101  | 6.25074   |
| PRPF8     | 7.81842   | 7.78001     | 7.7962    | 7.99842   | 8.16394  | 7.83835   |

|           |           |           |            |           |            |            |
|-----------|-----------|-----------|------------|-----------|------------|------------|
| PRPS1     | 4.69614   | 4.72743   | 4.40037    | 4.9306    | 4.8513     | 5.11816    |
| PRPS1P2   | 0.553469  | 0.30793   | 0.805235   | 0.750589  | 0.237613   | -0.312577  |
| PRPS2     | 4.21679   | 4.1537    | 4.10534    | 4.44576   | 4.94564    | 4.91625    |
| PRPSAP1   | 3.89617   | 4.09939   | 3.59456    | 3.88269   | 4.1961     | 4.31981    |
| PRPSAP2   | 2.83035   | 3.08983   | 3.0137     | 3.4952    | 3.65839    | 4.04315    |
| PRR11     | 5.26513   | 5.34741   | 5.0762     | 5.54646   | 5.61553    | 5.57753    |
| PRR12     | 1.83622   | 1.45008   | 2.39769    | 2.07607   | 2.01214    | 1.97279    |
| PRR13     | 4.09902   | 4.09693   | 4.0896     | 4.74902   | 4.23878    | 4.52131    |
| PRR13P5   | 0.823749  | 0.876519  | 1.0154     | 1.64047   | 1.08045    | 1.61592    |
| PRR14     | 1.73558   | 1.554     | 1.48185    | 1.71138   | 1.62974    | 1.70271    |
| PRR14L    | 6.16299   | 6.1221    | 6.02835    | 6.1958    | 5.88126    | 5.70161    |
| PRR16     | 0.840145  | 0.060836  | 0.00643448 | 0.383121  | 2.08118    | 1.493      |
| PRR26     | 2.37775   | 2.18822   | 2.38255    | 1.97335   | 1.17263    | 0.401903   |
| PRR3      | 3.54725   | 3.41262   | 3.30882    | 3.34408   | 4.12855    | 3.64665    |
| PRR34-AS1 | 0.577131  | 0.929533  | 0.893354   | 1.49112   | 1.35654    | 1.84021    |
| PRR4      | 2.31483   | 2.44671   | 2.67859    | 2.47464   | 1.96114    | 1.60141    |
| PRR5L     | -1.34118  | -1.46246  | 2.24276    | 2.61228   | 2.76176    | 2.99026    |
| PRR7-AS1  | 1.23351   | 0.6247    | -0.117291  | 0.213217  | 0.485993   | 0.156837   |
| PRRC1     | 5.02926   | 5.13333   | 5.31033    | 5.58247   | 5.02179    | 5.1458     |
| PRRC2A    | 5.71219   | 5.59684   | 5.96747    | 5.89187   | 6.50941    | 6.54863    |
| PRRC2B    | 6.42491   | 6.20022   | 6.44151    | 6.26187   | 6.49748    | 6.08624    |
| PRRC2C    | 8.16697   | 8.20307   | 7.95274    | 8.05634   | 7.66458    | 7.41849    |
| PRRG1     | 2.55515   | 2.43803   | 3.72186    | 3.96932   | 2.16462    | 2.2475     |
| PRRG4     | 1.57708   | 1.93378   | 1.7995     | 2.37097   | 2.18833    | 2.31011    |
| PRRT2     | 1.40759   | 1.31462   | 0.731696   | 0.631933  | 0.645121   | -0.173396  |
| PRRT3     | 1.08111   | 1.02103   | 1.64306    | 1.66599   | 1.29902    | 1.32675    |
| PRRX1     | 5.33123   | 5.13194   | -1.86109   | -1.15432  | 6.04898    | 6.44398    |
| PRSS12    | 3.03054   | 3.13521   | -0.628724  | -0.380732 | 5.5543     | 5.45818    |
| PRSS23    | 6.33973   | 6.25279   | 8.04946    | 8.45552   | 7.64057    | 7.69147    |
| PRSS35    | -0.943927 | -2.37465  | 2.29627    | 3.4948    | 6.62117    | 6.87895    |
| PRSS53    | 1.15427   | 0.86232   | 1.65008    | 1.72268   | 0.887853   | -0.167275  |
| PRTFDC1   | 3.75145   | 3.6594    | 3.12239    | 3.34153   | -0.0903144 | 0.702755   |
| PRTG      | 4.47829   | 4.09748   | 4.13049    | 3.71503   | 3.21915    | 2.5173     |
| PRUNE     | 3.75213   | 3.76116   | 3.35176    | 3.69852   | 3.56971    | 3.79113    |
| PRUNE2    | 4.83474   | 4.25911   | 0.82777    | 1.06115   | 3.64233    | 4.00581    |
| PRX       | -0.94393  | -0.790185 | 1.51       | 1.6394    | -0.393347  | -0.0918635 |
| PSAP      | 8.84157   | 8.7144    | 8.2218     | 8.41143   | 9.87939    | 9.84989    |
| PSAT1     | 4.03429   | 3.38375   | 4.07482    | 4.08434   | 5.06567    | 4.15583    |
| PSD3      | 5.90593   | 5.81093   | 6.80994    | 6.56641   | 6.68709    | 6.80109    |
| PSD4      | 0.529821  | 1.23764   | 0.699196   | 2.40689   | 5.93026    | 6.63784    |
| PSEN1     | 5.35076   | 5.38107   | 4.5863     | 4.8033    | 5.47698    | 5.46445    |
| PSEN2     | 3.44558   | 3.66644   | 2.80517    | 3.31954   | 3.25855    | 3.76699    |
| PSENEN    | 3.46792   | 3.60145   | 4.08507    | 4.49215   | 4.15248    | 4.83423    |
| PSG4      | -1.94365  | -2.76144  | 2.2131     | 2.93778   | -2.14756   | -2.25798   |
| PSIP1     | 5.8437    | 5.82849   | 5.32096    | 5.38463   | 6.69365    | 6.3537     |
| PSKH1     | 3.31355   | 2.88589   | 3.97635    | 4.07471   | 4.29239    | 3.65083    |
| PSMA1     | 5.96578   | 6.04678   | 6.41394    | 6.78617   | 6.03224    | 6.36407    |
| PSMA2     | 6.04746   | 6.13849   | 6.26898    | 6.79108   | 6.07543    | 6.83255    |
| PSMA2P3   | 1.39468   | 1.73596   | 1.75392    | 2.40034   | 1.7059     | 1.8084     |
| PSMA3     | 5.14446   | 5.30615   | 4.54778    | 5.09879   | 4.94192    | 5.89318    |
| PSMA3-AS1 | 4.44526   | 4.43504   | 4.04889    | 3.81747   | 4.53321    | 4.07743    |
| PSMA4     | 5.97862   | 6.13123   | 5.93151    | 6.50149   | 6.33913    | 7.30502    |

|           |          |          |          |          |           |          |
|-----------|----------|----------|----------|----------|-----------|----------|
| PSMA5     | 5.54555  | 5.67639  | 5.51605  | 6.10911  | 5.7147    | 6.4544   |
| PSMA6     | 5.25364  | 5.35422  | 4.8177   | 5.32498  | 5.62586   | 6.66529  |
| PSMA6P1   | 2.9929   | 3.23514  | 2.84476  | 3.34772  | 3.31586   | 4.39552  |
| PSMA7     | 6.96974  | 7.01016  | 6.22666  | 6.69773  | 6.84462   | 7.44562  |
| PSMB1     | 5.5473   | 5.58052  | 5.83812  | 6.26267  | 6.64179   | 7.14896  |
| PSMB10    | 1.62016  | 1.73726  | 3.65223  | 4.19986  | 3.50755   | 4.61685  |
| PSMB2     | 5.90965  | 5.94596  | 5.78297  | 6.23794  | 6.13409   | 6.13485  |
| PSMB3     | 5.73451  | 5.82859  | 5.46392  | 6.05104  | 6.10394   | 6.66235  |
| PSMB4     | 7.36205  | 7.43019  | 6.61735  | 6.99278  | 6.92297   | 7.29645  |
| PSMB5     | 5.99222  | 6.03073  | 4.98515  | 5.48549  | 6.2334    | 6.53226  |
| PSMB6     | 4.77108  | 4.98423  | 5.43942  | 5.95958  | 5.72795   | 6.04859  |
| PSMB7     | 5.61833  | 5.68022  | 5.1773   | 5.82634  | 5.73462   | 6.19677  |
| PSMB8     | 3.48326  | 3.64338  | 4.69806  | 5.21704  | 4.52683   | 5.3627   |
| PSMB8-AS1 | 0.742756 | 0.816338 | 2.47024  | 2.71496  | 1.89626   | 1.79552  |
| PSMB9     | 2.09536  | 2.40135  | 3.70527  | 4.1224   | 1.14064   | 2.37012  |
| PSMC1     | 3.73528  | 3.79451  | 2.96127  | 3.35222  | 3.63817   | 3.9426   |
| PSMC1P1   | 6.1844   | 6.22275  | 5.34137  | 5.75259  | 6.05188   | 6.23526  |
| PSMC2     | 6.01391  | 6.15175  | 5.76823  | 6.3428   | 6.21338   | 6.79948  |
| PSMC3     | 5.998    | 5.9489   | 5.90887  | 6.30187  | 6.45892   | 6.63174  |
| PSMC3IP   | 2.52881  | 2.6565   | 2.5241   | 2.98449  | 3.4255    | 3.34055  |
| PSMC4     | 6.10382  | 6.24364  | 5.23274  | 5.85516  | 6.50522   | 6.63198  |
| PSMC5     | 5.54075  | 5.63656  | 5.33737  | 5.83238  | 6.53085   | 6.61653  |
| PSMC6     | 4.80146  | 4.95917  | 4.26982  | 4.61307  | 4.84748   | 5.29346  |
| PSMD1     | 6.71474  | 6.87342  | 7.14532  | 7.52129  | 6.98263   | 7.15338  |
| PSMD10    | 4.21529  | 4.26166  | 4.00259  | 4.39895  | 4.65199   | 4.94971  |
| PSMD10P1  | 1.04244  | 0.813344 | 1.19157  | 0.810106 | 0.670686  | 0.151378 |
| PSMD11    | 6.47512  | 6.54763  | 6.33515  | 6.61126  | 6.76748   | 6.66896  |
| PSMD12    | 5.65784  | 5.83236  | 5.85822  | 6.20261  | 6.8558    | 6.99598  |
| PSMD12P   | 0.762077 | 1.16571  | 1.17137  | 1.21386  | 2.05339   | 1.9488   |
| PSMD13    | 6.28218  | 6.35288  | 6.19173  | 6.56096  | 6.02487   | 6.50243  |
| PSMD14    | 6.14052  | 6.18977  | 5.94317  | 6.30504  | 6.57747   | 6.97031  |
| PSMD2     | 6.84477  | 6.98393  | 7.35374  | 7.80529  | 7.78142   | 7.76127  |
| PSMD3     | 5.66453  | 5.74386  | 6.27539  | 6.62292  | 6.42002   | 6.33081  |
| PSMD4     | 6.12278  | 6.19176  | 5.77586  | 6.2014   | 6.13067   | 6.40534  |
| PSMD5     | 4.24269  | 4.26421  | 2.7909   | 3.17889  | 4.70546   | 5.01864  |
| PSMD5-AS1 | 3.66614  | 3.587    | 2.02595  | 1.94648  | 3.41382   | 2.88575  |
| PSMD6     | 6.0669   | 6.14938  | 5.62267  | 5.8691   | 5.76561   | 5.97643  |
| PSMD6-AS2 | 2.05464  | 1.94541  | 2.53714  | 2.16334  | 1.3909    | 0.435746 |
| PSMD7     | 5.9294   | 5.96852  | 5.92957  | 6.3183   | 5.80619   | 6.02578  |
| PSMD8     | 5.68929  | 5.73079  | 5.46798  | 5.96869  | 6.5398    | 7.02951  |
| PSMD8P1   | 0.116631 | 0.365995 | 0.045429 | 0.646135 | 1.32661   | 1.35679  |
| PSMD9     | 4.18509  | 4.06905  | 3.1661   | 3.62165  | 4.02661   | 4.31536  |
| PSME1     | 4.63127  | 4.79747  | 4.19043  | 4.62418  | 4.88754   | 5.27769  |
| PSME2     | 4.33201  | 4.58151  | 4.5146   | 5.10866  | 4.83804   | 5.37815  |
| PSME2P2   | 2.40891  | 2.72786  | 2.88988  | 3.31163  | 2.59035   | 3.09161  |
| PSME3     | 5.45321  | 5.3344   | 4.92412  | 5.16961  | 6.03183   | 6.14597  |
| PSME4     | 6.6128   | 6.55953  | 6.24013  | 6.25475  | 6.79226   | 6.88382  |
| PSMF1     | 4.64688  | 4.84379  | 5.34248  | 5.77587  | 4.712     | 4.87166  |
| PSMG1     | 3.36566  | 3.55396  | 3.6462   | 4.29205  | 3.92183   | 4.49172  |
| PSMG2     | 3.23144  | 3.44694  | 3.27189  | 3.75848  | 3.78911   | 4.33098  |
| PSMG3     | 4.18965  | 4.16924  | 3.5478   | 3.97465  | 3.98534   | 4.40573  |
| PSMG3-AS1 | -1.27248 | -2.1403  | 1.96116  | 2.08595  | -0.987612 | -1.89883 |

|           |            |           |            |           |          |            |
|-----------|------------|-----------|------------|-----------|----------|------------|
| PSMG4     | 3.46982    | 3.43226   | 3.48814    | 3.46155   | 3.90008  | 3.84781    |
| PSPC1     | 5.40156    | 5.4817    | 4.61414    | 4.71055   | 4.74749  | 4.80306    |
| PSPH      | 3.40158    | 3.31688   | 3.58299    | 3.84676   | 4.34596  | 4.23286    |
| PSPN      | 0.416559   | 0.151976  | -0.0798272 | 0.259977  | 0.720068 | 0.463298   |
| PSRC1     | 4.24563    | 4.20248   | 3.85403    | 4.14502   | 4.38953  | 4.37544    |
| PSTK      | 0.952035   | 0.894767  | 0.64945    | 0.430424  | 2.28515  | 2.68131    |
| PTAR1     | 6.84587    | 6.86328   | 5.45309    | 5.77113   | 7.06449  | 7.19772    |
| PTBP1     | 6.27083    | 6.18999   | 5.67017    | 5.9928    | 6.37683  | 6.29738    |
| PTBP2     | 4.99744    | 4.9863    | 5.08793    | 4.70735   | 4.76542  | 4.41352    |
| PTBP3     | 5.77891    | 6.00605   | 5.44123    | 5.56797   | 6.23442  | 5.91031    |
| PTCD1     | 3.42148    | 3.55205   | 2.82274    | 3.19659   | 3.18403  | 3.10768    |
| PTCD2     | 3.56537    | 3.6019    | 4.19585    | 4.45341   | 3.82701  | 3.96833    |
| PTCD3     | 6.00135    | 5.87699   | 5.55541    | 5.64974   | 5.90454  | 5.71797    |
| PTCH1     | 6.16938    | 6.46743   | 3.47206    | 3.03921   | 1.2102   | 0.958026   |
| PTCHD4    | 2.69753    | 2.87701   | -0.69145   | -0.979274 | -1.13645 | -1.12145   |
| PTDSS1    | 5.85856    | 5.94683   | 5.88454    | 6.41352   | 6.46866  | 6.57257    |
| PTDSS2    | 4.05414    | 3.86358   | 4.20556    | 4.19038   | 3.44166  | 3.25907    |
| PTEN      | 5.7244     | 5.39362   | 5.89827    | 6.00951   | 5.5348   | 5.22632    |
| PTENP1    | 3.40339    | 3.15157   | 3.31626    | 3.46813   | 2.7505   | 2.96861    |
| PTER      | 2.44304    | 2.19181 ? |            | -6.09892  | -4.65668 | -4.70296   |
| PTGER4    | -1.05494   | -0.508457 | -0.138983  | 0.139221  | 1.77435  | 1.28202    |
| PTGES     | 2.09859    | 2.25142   | -2.37543   | -1.30113  | -3.6585  | -1.89883   |
| PTGES2    | 4.12905    | 4.06658   | 3.21522    | 3.5278    | 3.95715  | 4.34041    |
| PTGES3    | 5.82824    | 5.88663   | 6.35232    | 6.65424   | 6.89996  | 7.16271    |
| PTGES3P1  | 3.43409    | 3.46674   | 3.91564    | 4.18984   | 4.437    | 4.28079    |
| PTGES3P3  | 1.05965    | 0.766476  | 1.54926    | 1.57865   | 1.77405  | 2.06527    |
| PTGFR     | -0.569597  | -0.58     | 3.07386    | 4.02944   | 3.73523  | 3.971      |
| PTGFRN    | 6.76583    | 7.53325   | 5.45037    | 5.96028   | 5.62941  | 5.95639    |
| PTGR1     | 2.18038    | 2.26849   | 6.56065    | 7.31257   | 2.74058  | 3.15739    |
| PTGR2     | 2.77694    | 2.73507   | 2.55145    | 2.68052   | 2.31964  | 2.26433    |
| PTGS2     | 1.59558    | 1.17383   | 3.01124    | 3.42838   | 0.489522 | 0.0213376  |
| PTHLH     | 1.18307    | 1.81683   | -0.0748589 | 0.383121  | 5.48823  | 5.42838    |
| PTK2      | 5.83886    | 5.94441   | 6.02104    | 6.30267   | 5.95599  | 6.471      |
| PTK7      | 5.29562    | 4.97698   | 6.13501    | 6.11848   | 5.89258  | 5.87683    |
| PTMA      | 8.38857    | 8.2827    | 7.89174    | 8.13303   | 8.37778  | 8.19053    |
| PTMAP2    | 5.70875    | 5.66942   | 5.29403    | 5.39853   | 5.73199  | 5.32072    |
| PTMAP5    | 6.03702    | 5.91393   | 5.535      | 5.79157   | 6.16921  | 5.8077     |
| PTMS      | 4.17359    | 4.03301   | 4.08326    | 4.14973   | 4.85342  | 4.31009    |
| PTN       | 5.39231    | 5.32873   | 2.40521    | 2.48738   | 6.32122  | 6.46104    |
| PTOV1     | 4.09392    | 3.76687   | 4.45893    | 4.51943   | 4.8643   | 4.67772    |
| PTOV1-AS1 | 1.8673     | 1.68041   | 2.76474    | 2.35936   | 2.51554  | 2.31717    |
| PTOV1-AS2 | -0.0703423 | -0.122741 | 0.307219   | 0.336432  | 0.4027   | -0.0282633 |
| PTP4A1    | 6.08818    | 6.12421   | 4.89716    | 4.86474   | 5.19688  | 4.83434    |
| PTP4A2    | 6.62011    | 6.49204   | 6.02634    | 6.24646   | 7.0378   | 6.97873    |
| PTP4A2P1  | 1.77869    | 1.68891   | 1.20146    | 1.32676   | 2.23474  | 2.2075     |
| PTPDC1    | 3.72193    | 3.72327   | 2.83607    | 2.73981   | 2.78884  | 2.32673    |
| PTPMT1    | 3.76545    | 3.69879   | 3.89027    | 4.01742   | 4.24017  | 4.28313    |
| PTPN1     | 4.85874    | 5.17388   | 5.2188     | 5.79329   | 5.70767  | 5.99894    |
| PTPN11    | 7.45974    | 7.51794   | 6.39708    | 6.79477   | 7.07855  | 7.12172    |
| PTPN12    | 5.63627    | 5.6213    | 5.13049    | 5.04282   | 5.56281  | 5.74139    |
| PTPN13    | 5.00091    | 4.80861   | 5.42196    | 5.65562   | 4.48052  | 4.47194    |
| PTPN14    | 6.51971    | 6.58569   | 6.85788    | 7.19245   | 6.36989  | 6.2898     |

|           |           |           |            |            |            |          |
|-----------|-----------|-----------|------------|------------|------------|----------|
| PTPN18    | 3.16356   | 3.22541   | 3.02349    | 3.31534    | 3.00503    | 2.8932   |
| PTPN2     | 3.2381    | 3.39808   | 3.24911    | 3.49175    | 3.95089    | 4.1814   |
| PTPN21    | 2.72879   | 3.08791   | 1.69105    | 1.79748    | 2.62978    | 2.91883  |
| PTPN23    | 2.84975   | 2.60595   | 3.04048    | 3.05609    | 2.95624    | 3.17899  |
| PTPN2P1   | 0.403977  | 0.296581  | -0.736033  | -0.284892  | 0.497382   | 0.403257 |
| PTPN3     | 4.78372   | 5.03949   | -6.17309   | -5.10387   | -6.64581 ? |          |
| PTPN4     | 4.48393   | 4.77196   | 4.02471    | 4.25859    | 4.4651     | 4.61746  |
| PTPN9     | 4.46646   | 4.1296    | 4.18498    | 4.35161    | 4.15024    | 3.72374  |
| PTPRA     | 5.0248    | 5.05095   | 4.91362    | 5.09777    | 4.64098    | 4.78203  |
| PTPRB     | -0.569597 | 0.256552  | 1.19454    | 0.924685   | 5.67239    | 4.7131   |
| PTPRD     | 3.52613   | 3.40444   | -6.17309   | -6.09892 ? |            | -5.69922 |
| PTPRE     | 1.68466   | 1.69706   | 3.19369    | 3.48176    | -5.65305   | -3.12051 |
| PTPRF     | 8.23959   | 7.89856   | 6.12735    | 5.87986    | 5.25442    | 4.33357  |
| PTPRG     | -0.16608  | -0.228138 | 6.59328    | 6.72935    | 5.76591    | 5.54788  |
| PTPRG-AS1 | 0.55278   | 0.556287  | 0.447801   | 0.352984   | -0.875309  | -1.19952 |
| PTPRH     | 2.68463   | 2.21665   | 1.59787    | 1.90242    | -1.37455   | -1.53638 |
| PTPRJ     | 5.89621   | 5.93458   | 7.01219    | 7.34208    | 7.3973     | 7.12776  |
| PTPRK     | 5.05578   | 5.07824   | 6.44444    | 6.61733    | 7.2356     | 7.31889  |
| PTPRM     | 2.83426   | 2.66902   | 5.44628    | 5.51184    | -6.64581 ? |          |
| PTPRN     | -3.69722  | -4.45968  | 3.14066    | 3.48922    | -3.62454   | -5.69922 |
| PTPRN2    | -2.23898  | -1.25306  | 2.12483    | 2.8968     | -5.65305   | -2.53597 |
| PTPRO     | -3.5275   | -5.45651  | -2.5977    | -3.30006   | 1.3621     | 1.84021  |
| PTPRR     | -2.78042  | -1.25306  | -4.18092   | -2.10822   | 2.76651    | 1.84021  |
| PTPRS     | 6.34432   | 6.06243   | 5.66509    | 5.52097    | 6.25906    | 5.8941   |
| PTPRU     | 3.93209   | 3.58973   | 2.84991    | 3.50405    | 0.969108   | 1.493    |
| PTPRZ1    | 5.09167   | 4.39512   | -4.59508   | -4.52056   | 6.50913    | 6.16941  |
| PTRF      | 6.27173   | 6.26995   | 6.56046    | 7.11108    | 7.38689    | 7.17439  |
| PTRH2     | 4.83512   | 4.83551   | 4.53549    | 4.75562    | 5.56811    | 5.62211  |
| PTRHD1    | 2.13184   | 1.76062   | 0.564846   | 0.822689   | 2.43338    | 2.80884  |
| PTS       | 2.26275   | 2.0377    | 2.76358    | 3.08462    | 3.32298    | 4.26626  |
| PTTG1     | 5.06408   | 5.20936   | 5.50026    | 6.20439    | 5.42969    | 6.23432  |
| PTTG1IP   | 6.88459   | 6.70764   | 7.50422    | 7.85046    | 6.40942    | 6.31426  |
| PTTG2     | -0.52896  | 0.0613753 | 0.276497   | 0.89124    | 0.32848    | 0.299092 |
| PTTG3P    | 0.378933  | 0.880999  | 1.13108    | 1.98252    | 1.12972    | 1.66661  |
| PTX3      | 4.70977   | 4.69954   | 4.67056    | 5.5305     | 0.172692   | 0.50283  |
| PUF60     | 5.47085   | 5.34854   | 5.14289    | 5.44239    | 6.09914    | 6.21475  |
| PUM1      | 6.10909   | 6.00195   | 5.96969    | 6.04058    | 6.25107    | 5.91715  |
| PUM2      | 5.91811   | 5.86354   | 5.24065    | 5.35417    | 6.18264    | 6.18354  |
| PURA      | 5.24562   | 5.47047   | 5.33463    | 5.3032     | 5.0929     | 5.3198   |
| PURB      | 6.3043    | 6.71041   | 5.89815    | 6.30599    | 5.91553    | 6.32482  |
| PUS1      | 3.18966   | 2.97595   | 1.93544    | 2.27921    | 2.57332    | 2.5317   |
| PUS10     | 1.6696    | 1.87357   | 2.25798    | 2.29238    | 2.39163    | 2.22899  |
| PUS3      | 3.1759    | 3.19      | 2.9713     | 3.21311    | 3.32553    | 3.51487  |
| PUS7      | 4.78925   | 4.82948   | 3.59947    | 3.96396    | 4.80526    | 4.69842  |
| PUS7L     | 5.09452   | 5.13985   | 4.91648    | 5.04346    | 4.84201    | 5.13719  |
| PUSL1     | 1.52713   | 1.62789   | 1.34008    | 1.87106    | 2.4967     | 2.63139  |
| PVR       | 5.19267   | 5.23843   | 4.77064    | 5.32521    | 6.04446    | 6.0101   |
| PVRL1     | 3.6251    | 3.43197   | 3.04048    | 3.06361    | 1.31701    | 1.71958  |
| PVRL2     | 4.4184    | 4.06532   | 5.59154    | 5.56968    | 5.11816    | 4.70791  |
| PVRL3     | 5.32744   | 5.48989   | 5.80443    | 5.95119    | 5.70161    | 5.98981  |
| PVT1      | 4.13811   | 4.09288   | 3.30479    | 3.50562    | 3.35102    | 3.15944  |
| PWAR5     | 2.87268   | 2.89251   | -6.17309 ? |            | 2.51637    | 1.51249  |

|             |          |           |          |           |          |          |
|-------------|----------|-----------|----------|-----------|----------|----------|
| PWAR6       | 1.98622  | 2.09487 ? | ?        |           | 1.79341  | 1.06153  |
| PWP1        | 4.94656  | 4.99965   | 4.14178  | 4.69206   | 4.56851  | 4.9043   |
| PWP2        | 3.19467  | 3.28733   | 1.7271   | 2.07039   | 1.3635   | 1.45309  |
| PWWP2A      | 3.69538  | 3.6299    | 4.39012  | 4.34445   | 3.9979   | 3.74037  |
| PXDC1       | 2.8173   | 2.81388   | 2.31619  | 2.77693   | 3.71429  | 4.05702  |
| PXDN        | -1.37679 | -2.06994  | 7.42005  | 7.19178   | 7.9801   | 7.18087  |
| PXK         | 3.56654  | 3.51586   | 3.48182  | 4.00622   | 3.58287  | 3.3834   |
| PXMP2       | 3.00136  | 2.53999   | 2.28002  | 2.12481   | 2.50209  | 2.677    |
| PXMP4       | 1.54889  | 1.49139   | 3.3749   | 3.65935   | 3.09458  | 3.06478  |
| PXN         | 5.78196  | 5.93      | 5.02039  | 5.25598   | 5.26112  | 5.31099  |
| PXN-AS1     | 0.759761 | 0.383652  | 0.227224 | 0.0150408 | 0.427982 | 0.37421  |
| PXYLP1      | 6.63633  | 6.99263   | 0.699196 | 0.924655  | -1.65987 | -1.24695 |
| PYCARD      | -8.51779 | -5.70452  | 2.75441  | 2.88165   | -5.90088 | -8.52515 |
| PYCR1       | 4.64779  | 4.44172   | 3.84017  | 4.18724   | 4.25251  | 4.74746  |
| PYCR2       | 4.12189  | 3.86806   | 4.10649  | 4.23324   | 4.65879  | 4.7486   |
| PYCRL       | 2.05583  | 1.80865   | 2.17844  | 2.70817   | 1.49454  | 2.06149  |
| PYGB        | 9.49228  | 9.45522   | 5.39011  | 6.0036    | 7.85277  | 8.2667   |
| PYGL        | 5.2401   | 5.38179   | 2.79662  | 3.44577   | 5.43506  | 5.63868  |
| PYGO1       | 4.46895  | 4.29205   | 4.22161  | 4.03965   | 3.89523  | 3.24166  |
| PYGO2       | 4.59898  | 4.56772   | 3.75899  | 3.92321   | 4.65787  | 4.68022  |
| PYROXD1     | 3.1969   | 3.35636   | 2.71191  | 2.95681   | 2.75117  | 3.28141  |
| PYROXD2     | 0.885949 | 0.419895  | 2.73535  | 2.92185   | 2.29681  | 2.21217  |
| PYURF       | 3.69824  | 4.06164   | 3.04772  | 3.58117   | 3.86907  | 4.7151   |
| QARS        | 6.23976  | 6.10439   | 5.76154  | 6.10062   | 6.4768   | 6.3363   |
| QDPR        | 2.18968  | 2.0956    | 1.84441  | 2.11519   | 2.6135   | 2.86694  |
| QKI         | 7.01202  | 7.02638   | 6.0771   | 6.21534   | 8.04449  | 7.646    |
| QPCTL       | 3.37775  | 3.19716   | 2.94834  | 3.24432   | 3.52331  | 3.62868  |
| QPRT        | -4.69535 | -4.13839  | 3.53928  | 3.35878   | -1.41202 | -2.53597 |
| QRICH1      | 5.62959  | 5.59751   | 5.18115  | 5.38602   | 5.64573  | 5.52389  |
| QRSL1       | 2.8284   | 2.94655   | 2.82491  | 3.37298   | 3.73736  | 4.03811  |
| QSER1       | 6.41253  | 6.09965   | 5.97541  | 5.74681   | 6.15343  | 5.87588  |
| QSOX1       | 6.16044  | 6.19937   | 5.41406  | 5.68313   | 6.2164   | 6.35903  |
| QSOX2       | 5.0365   | 5.08114   | 4.67834  | 5.0994    | 4.35928  | 4.24019  |
| QTRT1       | 2.55123  | 2.37637   | 1.84441  | 2.1296    | 2.60649  | 2.70269  |
| QTRTD1      | 4.50915  | 4.6907    | 4.26871  | 4.61824   | 4.66723  | 4.73622  |
| R3HCC1      | 2.99963  | 3.11081   | 2.93283  | 3.48176   | 3.14382  | 3.60843  |
| R3HCC1L     | 3.78474  | 3.61264   | 3.96624  | 4.00491   | 4.05563  | 4.03307  |
| R3HDM1      | 4.4462   | 4.41597   | 4.25006  | 4.22433   | 4.81794  | 4.79512  |
| R3HDM2      | 2.17438  | 2.1738    | 3.1111   | 2.97864   | 3.07441  | 2.76903  |
| R3HDM4      | 2.86126  | 2.87701   | 2.57804  | 2.85408   | 3.51336  | 3.80701  |
| RAB10       | 5.77259  | 5.7848    | 5.51386  | 5.94      | 6.51288  | 6.88549  |
| RAB11A      | 5.40551  | 5.37398   | 5.39998  | 5.69043   | 5.79501  | 6.13639  |
| RAB11B      | 1.7001   | 1.21668   | 1.91253  | 1.56658   | 1.69932  | 1.64956  |
| RAB11FIP1P1 | 1.84476  | 1.66955   | 2.86007  | 2.78671   | 2.77695  | 2.47346  |
| RAB11FIP2   | 3.92431  | 3.95713   | 3.85495  | 4.10649   | 4.79493  | 4.51168  |
| RAB11FIP3   | 3.23903  | 2.89691   | 3.30833  | 3.25531   | 2.9209   | 2.42258  |
| RAB11FIP4   | 3.37907  | 3.16834   | 2.13391  | 2.13437   | 2.87691  | 2.5317   |
| RAB11FIP5   | 3.73138  | 3.73067   | 4.15187  | 4.75146   | 4.56607  | 4.64641  |
| RAB12       | 3.35267  | 3.37404   | 4.02796  | 4.34589   | 5.18628  | 4.94409  |
| RAB13       | 6.08081  | 5.86202   | 4.70997  | 5.06124   | 4.57241  | 4.48047  |
| RAB14       | 5.13301  | 5.19892   | 4.72711  | 5.00556   | 5.17376  | 5.29257  |
| RAB15       | 4.21005  | 3.98423   | 2.51693  | 2.43808   | 2.08454  | 1.58794  |

|           |           |           |           |              |            |           |
|-----------|-----------|-----------|-----------|--------------|------------|-----------|
| RAB17     | -0.191134 | -0.418273 | 3.55795   | 3.50036      | -1.45047   | -2.12114  |
| RAB18     | 4.58284   | 4.60392   | 4.57721   | 5.07666      | 5.08911    | 5.13878   |
| RAB1A     | 5.32126   | 5.34801   | 5.27833   | 5.68204      | 5.9142     | 6.04301   |
| RAB1B     | 5.52043   | 5.26527   | 5.17342   | 5.49888      | 5.25102    | 5.42876   |
| RAB1C     | 1.10421   | 1.12237   | 1.04648   | 1.15102      | 0.572511   | 0.847043  |
| RAB20     | 0.824548  | 0.331671  | 2.18718   | 2.4799       | 2.72987    | 2.18812   |
| RAB21     | 5.03604   | 5.11363   | 4.11339   | 4.44191      | 5.11323    | 4.74758   |
| RAB22A    | 6.12984   | 6.2445    | 5.23221   | 5.40785      | 5.72689    | 5.61746   |
| RAB23     | 3.0777    | 2.96098   | 3.0768    | 3.04326      | 3.89803    | 4.14363   |
| RAB24     | 3.04724   | 2.87165   | 3.46364   | 3.69018      | 3.37308    | 3.11516   |
| RAB26     | 1.67164   | 1.67161   | 1.37111   | 1.62592      | 2.60414    | 2.55539   |
| RAB27A    | 2.58823   | 2.28511   | 4.11756   | 4.43152      | 2.74492    | 2.76903   |
| RAB27B    | 3.48827   | 3.7827    | 3.33808   | 3.79594      | 2.52705    | 3.85362   |
| RAB28     | 2.94298   | 2.78983   | 2.49518   | 2.60477      | 3.30546    | 3.09389   |
| RAB29     | 4.00309   | 4.20427   | 3.51344   | 4.14974      | 4.28366    | 4.62083   |
| RAB2A     | 4.31842   | 4.33075   | 5.09956   | 5.5305       | 4.88609    | 5.03306   |
| RAB2B     | 2.64744   | 2.6509    | 1.80519   | 2.17659      | 3.03493    | 3.29611   |
| RAB30     | 2.98742   | 3.09175   | 4.53843   | 5.00685      | 3.61115    | 3.77307   |
| RAB30-AS1 | 2.82645   | 2.81793   | 3.40332   | 3.4515       | 2.53692    | 1.9868    |
| RAB31     | 3.81662   | 3.81211   | 5.38252   | 5.99675      | 6.19551    | 6.65193   |
| RAB32     | 1.26675   | 1.73686   | 1.69915   | 3.2176       | 3.82853    | 5.57521   |
| RAB33B    | 1.91197   | 1.95924   | 1.98141   | 2.48364      | 2.50778    | 2.41647   |
| RAB34     | 4.26019   | 4.1324    | 4.70445   | 5.10427      | 5.30113    | 5.89551   |
| RAB35     | 4.30948   | 4.30946   | 3.82831   | 4.1852       | 4.5534     | 4.55067   |
| RAB36     | 1.18361   | 0.894767  | 2.32429   | 2.44193      | 0.969108   | 0.633217  |
| RAB38     | 2.22278   | 2.52585 ? |           | -6.09892     | -1.80184   | -1.24695  |
| RAB39B    | 0.676033  | 1.14454   | -3.59683  | -1.15432     | -0.0308197 | 2.25331   |
| RAB3B     | 2.30375   | 2.03303   | 3.11798   | 3.81152      | 4.02793    | 3.64864   |
| RAB3D     | 2.99905   | 2.67472   | -0.752046 | -0.000171691 | -1.61566   | -1.66208  |
| RAB3GAP1  | 4.97687   | 5.1431    | 4.81365   | 5.17714      | 5.55036    | 5.7169    |
| RAB3GAP2  | 5.7365    | 5.70455   | 5.01518   | 5.21496      | 5.62497    | 5.6775    |
| RAB3IP    | 4.07405   | 4.1882    | -0.598354 | -0.682344    | 4.11931    | 4.08607   |
| RAB40B    | 1.52496   | 1.01295   | 0.64945   | 0.46112      | 1.5829     | 1.18815   |
| RAB40C    | 1.92665   | 1.67161   | 1.5913    | 1.65276      | 2.10126    | 1.84021   |
| RAB42     | -3.11289  | -5.45651  | 1.09265   | 1.8565       | 2.1464     | 2.34859   |
| RAB43P1   | -0.538627 | -0.666455 | 1.06966   | 1.14536      | 0.290967   | 0.217516  |
| RAB4A     | 1.99443   | 2.17017   | 1.496     | 1.80409      | 3.97268    | 4.71324   |
| RAB4B     | 2.56906   | 2.15224   | 1.38262   | 1.37587      | 1.69466    | 1.34496   |
| RAB5A     | 4.6579    | 4.76291   | 4.05366   | 4.46291      | 4.9419     | 5.15514   |
| RAB5B     | 4.87123   | 4.85739   | 4.77574   | 5.2727       | 4.23072    | 4.65632   |
| RAB5C     | 5.05501   | 4.84928   | 4.98824   | 5.46136      | 5.77193    | 5.93582   |
| RAB6A     | 5.48631   | 5.58359   | 5.02106   | 5.46307      | 5.00316    | 5.03937   |
| RAB6B     | 2.08496   | 1.9482    | 1.49246   | 1.57002      | -1.30419   | -1.71477  |
| RAB6C     | 0.468844  | 0.399116  | 0.290165  | 0.592914     | -0.0755306 | -0.503988 |
| RAB7A     | 5.391     | 5.23411   | 4.94057   | 5.27324      | 5.69859    | 5.46818   |
| RAB7B     | 2.14643   | 2.55676   | 0.793829  | 1.49112      | -4.33548   | -2.8983   |
| RAB8A     | 4.38208   | 4.48868   | 4.27966   | 4.54846      | 5.33395    | 5.21803   |
| RAB8B     | 5.84756   | 5.92516   | 5.5929    | 5.85695      | 5.43342    | 5.51969   |
| RAB9A     | 1.75628   | 1.9035    | 2.50649   | 2.98394      | 2.67955    | 3.03476   |
| RAB9B     | 1.9303    | 2.23761   | 1.34008   | 0.978694     | -0.705893  | -2.12114  |
| RABAC1    | 2.52975   | 2.07245   | 2.78227   | 3.55117      | 1.83956    | 2.92265   |
| RABEP1    | 5.67386   | 5.62501   | 5.69454   | 5.86538      | 6.10073    | 6.20877   |

|           |          |          |          |          |           |          |
|-----------|----------|----------|----------|----------|-----------|----------|
| RABEP2    | 1.27825  | 1.00482  | 0.956086 | 1.05027  | 1.71476   | 1.92267  |
| RABEPK    | 2.78474  | 2.94443  | 2.18718  | 2.68885  | 3.15508   | 3.68345  |
| RABGAP1   | 4.75066  | 4.62384  | 4.97856  | 5.17659  | 4.80398   | 4.93556  |
| RABGAP1L  | 4.67867  | 4.69513  | 3.83607  | 3.98392  | 4.32054   | 4.60503  |
| RABGEF1   | 4.37008  | 4.46614  | 4.17524  | 4.61371  | 4.60478   | 4.89468  |
| RABGGTA   | 2.53455  | 2.53717  | 0.871828 | 1.16735  | 2.45864   | 2.55539  |
| RABGGTB   | 6.53196  | 6.53695  | 6.13417  | 6.2327   | 6.8027    | 6.8305   |
| RABIF     | 2.69753  | 2.66387  | 1.86635  | 2.24434  | 2.74909   | 3.12934  |
| RABL2A    | 1.73379  | 1.62473  | 2.0581   | 2.2252   | 2.01528   | 1.58095  |
| RABL2B    | 2.07923  | 1.99443  | 2.84072  | 2.99358  | 2.48262   | 2.35186  |
| RABL3     | 2.40946  | 2.38266  | 3.21522  | 3.33577  | 3.03666   | 3.12618  |
| RABL6     | 4.59487  | 4.34768  | 4.51284  | 4.61091  | 4.92357   | 4.74419  |
| RAC1      | 6.10478  | 6.19178  | 6.20628  | 6.59666  | 6.63898   | 6.52946  |
| RAC1P2    | 4.62691  | 4.62265  | 4.5948   | 4.99292  | 5.0749    | 5.0105   |
| RAC2      | ?        | -4.87366 | 3.6462   | 4.36893  | -2.85193  | -1.06257 |
| RAC3      | 2.41728  | 1.97597  | 1.48185  | 1.52057  | 2.98715   | 3.40181  |
| RACGAP1   | 6.17518  | 6.38846  | 5.45221  | 6.05573  | 5.42177   | 5.88153  |
| RAD1      | 4.06637  | 4.2581   | 4.60282  | 5.14514  | 4.5732    | 4.94317  |
| RAD17     | 3.7756   | 3.59011  | 4.29265  | 4.38793  | 4.52233   | 4.82698  |
| RAD18     | 5.21455  | 5.2153   | 4.36529  | 4.61824  | 4.64802   | 4.67805  |
| RAD21     | 7.03839  | 7.00366  | 6.79718  | 6.9922   | 6.9687    | 7.11345  |
| RAD23A    | 4.31956  | 4.13718  | 4.17458  | 4.41868  | 5.66828   | 5.44897  |
| RAD23B    | 6.61556  | 6.68517  | 6.01664  | 6.4147   | 6.67175   | 6.50684  |
| RAD23BP1  | 1.84056  | 2.07604  | 1.03831  | 1.74988  | 2.02586   | 1.77166  |
| RAD50     | 4.97771  | 4.86836  | 5.20658  | 5.3407   | 5.37608   | 5.49609  |
| RAD51     | 2.93936  | 2.96552  | 2.13391  | 2.41866  | 2.19146   | 2.09421  |
| RAD51-AS1 | 0.959191 | 0.752809 | 0.179855 | 0.317536 | 0.0402612 | -0.4586  |
| RAD51AP1  | 4.0558   | 3.45154  | 3.8595   | 3.70655  | 3.20233   | 3.04148  |
| RAD51B    | 1.68033  | 1.89033  | 2.40895  | 2.35879  | 1.19772   | 1.71958  |
| RAD51C    | 3.77056  | 3.85344  | 3.06441  | 3.40885  | 4.03578   | 4.56007  |
| RAD51D    | 3.49321  | 3.49135  | 3.47826  | 3.70334  | 3.85342   | 3.81095  |
| RAD52     | 2.83122  | 2.89966  | 3.08944  | 3.02362  | 2.24029   | 2.00733  |
| RAD54B    | 3.84699  | 3.87482  | 3.92609  | 4.01745  | 4.11227   | 4.39503  |
| RAD54L    | 3.81619  | 3.62359  | 4.11485  | 4.16392  | 3.14371   | 2.75969  |
| RAD54L2   | 5.66833  | 5.58119  | 4.93994  | 4.95725  | 5.28731   | 4.67806  |
| RAD9A     | 2.56232  | 2.23152  | 2.32292  | 2.39592  | 1.68051   | 1.16313  |
| RAE1      | 5.23719  | 5.28323  | 4.37585  | 4.83588  | 4.90622   | 5.05317  |
| RAF1      | 5.88538  | 5.85714  | 5.66005  | 5.88362  | 6.2417    | 6.0712   |
| RAI1      | 4.39433  | 4.06599  | 4.44363  | 4.21065  | 3.72361   | 3.36743  |
| RAI14     | 5.63548  | 5.59345  | 5.65411  | 6.18148  | 6.27443   | 6.38139  |
| RALA      | 4.24828  | 4.26336  | 4.70586  | 5.10244  | 4.45529   | 4.83825  |
| RALB      | 4.12667  | 4.34852  | 3.60111  | 4.05983  | 4.01651   | 4.66831  |
| RALBP1    | 4.49244  | 4.62838  | 4.57621  | 4.95842  | 5.81986   | 6.15234  |
| RALGAPA1  | 4.02857  | 4.03556  | 2.53362  | 2.62785  | 3.6416    | 3.61984  |
| RALGAPA1P | 4.71629  | 4.78356  | 3.97023  | 3.86044  | 4.21975   | 4.32801  |
| RALGAPA2  | 5.49475  | 5.31358  | 7.10042  | 7.2317   | 4.71799   | 3.86503  |
| RALGAPB   | 6.70671  | 6.80042  | 6.26845  | 6.38204  | 6.14644   | 6.21437  |
| RALGDS    | 3.19119  | 2.99249  | 3.26769  | 3.47801  | 2.98535   | 2.919    |
| RALGPS1   | 0.800836 | 0.766044 | 0.674533 | 0.773887 | 0.549226  | 0.247587 |
| RALGPS2   | 5.17511  | 5.01028  | 2.50299  | 3.05357  | 4.7277    | 4.81193  |
| RALY      | 5.67107  | 5.5564   | 6.014    | 6.17395  | 5.39294   | 5.356    |
| RAMP1     | 4.53813  | 4.78448  | -3.85951 | -3.10759 | 0.499649  | 1.67702  |



|          |           |           |            |            |           |            |
|----------|-----------|-----------|------------|------------|-----------|------------|
| RAN      | 7.70945   | 7.79569   | 6.65458    | 7.26226    | 7.53942   | 7.93721    |
| RANBP1   | 6.23076   | 6.05705   | 5.22524    | 5.53745    | 5.3699    | 5.46438    |
| RANBP10  | 3.01346   | 2.97596   | 3.73086    | 3.85262    | 3.9754    | 3.55537    |
| RANBP2   | 7.95107   | 8.11477   | 7.3933     | 7.6912     | 7.78184   | 7.98113    |
| RANBP20P | 0.164786  | 0.0763402 | 0.00729598 | 0.511853   | 0.524846  | 0.0514974  |
| RANBP3   | 4.19952   | 4.1592    | 4.19477    | 4.42255    | 4.91899   | 4.61408    |
| RANBP3L  | -4.37417  | -3.13966  | 6.52705    | 6.4878     | -1.85245  | -2.70579   |
| RANBP6   | 4.84395   | 4.93962   | 4.53157    | 4.94713    | 5.98264   | 6.23835    |
| RANBP9   | 3.89333   | 3.82143   | 4.03049    | 4.25274    | 4.73984   | 4.73457    |
| RANGAP1  | 6.07116   | 6.09718   | 5.6117     | 6.13998    | 5.92111   | 5.92175    |
| RANGRF   | 2.33251   | 2.1413    | 2.49627    | 2.9742     | 2.93254   | 3.30722    |
| RANP1    | 5.289     | 5.3468    | 4.2285     | 4.84231    | 5.08243   | 5.46572    |
| RAP1A    | 4.3295    | 4.45229   | 4.06439    | 4.14265    | 4.19133   | 4.14347    |
| RAP1B    | 4.57636   | 4.86994   | 4.33886    | 4.52811    | 4.63551   | 5.03354    |
| RAP1GAP  | 1.77668   | 0.980157  | 0.292311   | 0.520618 ? |           | -4.70296   |
| RAP1GAP2 | 5.3953    | 5.68775   | 0.893354   | 0.879925   | 0.597155  | 0.752791   |
| RAP1GDS1 | 4.55062   | 4.70553   | 3.79662    | 4.15064    | 4.66588   | 5.04063    |
| RAP2A    | 6.06784   | 6.03999   | 4.84989    | 5.02559    | 5.08438   | 4.98619    |
| RAP2B    | 3.66505   | 3.74416   | 4.14515    | 4.4515     | 5.89243   | 5.78596    |
| RAP2C    | 3.19271   | 3.31359   | 3.8235     | 4.0023     | 5.67453   | 5.34925    |
| RAPGEF1  | 3.85647   | 3.6945    | 3.66039    | 3.89398    | 5.21081   | 4.89134    |
| RAPGEF2  | 5.02329   | 4.99555   | 4.83536    | 4.9892     | 5.26263   | 5.10063    |
| RAPGEF3  | -1.1361   | -0.75105  | 1.61437    | 2.01282    | -2.572    | -1.38442   |
| RAPGEF4  | -0.744656 | -1.0363   | -1.09576   | -1.58485   | 2.57439   | 2.78515    |
| RAPGEF5  | 2.10184   | 1.96763   | -4.59508   | -3.52222   | -5.07051  | -4.11926   |
| RAPGEF6  | 5.55201   | 5.66149   | 5.73217    | 5.99034    | 5.80311   | 5.77429    |
| RAPGEFL1 | 1.35081   | 1.24456   | 0.445928   | 0.95732    | 1.27637   | 0.615294   |
| RAPH1    | 5.13489   | 5.05309   | 4.77842    | 4.61305    | 4.54281   | 4.59452    |
| RARA     | 2.56439   | 2.27601   | 2.35178    | 2.44137    | 3.12774   | 2.81437    |
| RARB     | 4.50426   | 4.62329   | 5.29422    | 5.3875     | 5.83657   | 6.03684    |
| RARG     | 3.43792   | 3.20958   | 3.6651     | 3.85551    | 2.06763   | 1.80902    |
| RARRES1  | -0.703358 | -0.485378 | 3.33797    | 3.56537    | -0.572647 | -1.61882   |
| RARRES2  | ? ?       |           | 2.71735    | 2.67909    | -2.13612  | -2.12114   |
| RARRES3  | -2.89067  | -2.1403   | 2.84162    | 3.36081    | -2.26731  | -0.706491  |
| RARS     | 5.64604   | 5.81475   | 5.6957     | 6.23682    | 6.25916   | 7.13168    |
| RARS2    | 4.12348   | 4.1296    | 3.24274    | 3.46672    | 4.15266   | 4.84114    |
| RASA1    | 4.1548    | 4.21489   | 5.24819    | 5.59168    | 5.01749   | 5.017      |
| RASA2    | 3.67488   | 4.23845   | 3.77503    | 4.07852    | 2.93588   | 3.34042    |
| RASA3    | 4.60469   | 4.42208   | 3.843      | 4.16962    | 3.81238   | 3.81096    |
| RASA4    | 0.123997  | -0.571049 | 1.50915    | 1.55089    | 1.29149   | 0.245447   |
| RASAL2   | 5.3887    | 5.38733   | 4.40519    | 4.57679    | 5.98755   | 5.73777    |
| RASGRF2  | 0.54893   | 0.656176  | 1.7707     | 1.46864    | 0.381317  | -0.280287  |
| RASGRP1  | 2.42505   | 2.40445   | 1.32432    | 0.350701   | 1.3208    | 0.33778    |
| RASL10B  | 2.2493    | 1.16656   | -3.59683   | -5.10387   | -1.48999  | -4.11926   |
| RASL11A  | -2.69815  | -3.13966  | 2.64938    | 3.1224     | -1.90489  | -1.24695   |
| RASSF1   | 3.07368   | 3.01794   | 2.30834    | 2.40629    | 2.90481   | 2.68451    |
| RASSF2   | 0.334442  | 0.223769  | 2.27182    | 2.58118    | 3.48307   | 2.9972     |
| RASSF3   | 3.94748   | 4.16468   | 3.81365    | 4.31952    | 3.52951   | 3.68982    |
| RASSF4   | 6.19342   | 6.08885   | 4.40238    | 4.30161    | 3.76805   | 2.97277    |
| RASSF5   | 0.44057   | 0.444137  | 2.70523    | 2.85118    | -0.217212 | -0.0627204 |
| RASSF7   | 1.94841   | 1.15192   | 2.37873    | 2.75227    | 1.92467   | 2.21812    |
| RASSF8   | 6.31093   | 6.49749   | 5.15855    | 5.46624    | 5.30366   | 5.35127    |

|            |           |           |           |           |           |           |
|------------|-----------|-----------|-----------|-----------|-----------|-----------|
| RASSF8-AS1 | 2.73764   | 2.52585   | 2.68993   | 2.48364   | 1.5829    | 0.965773  |
| RAVER1     | 2.33221   | 1.82487   | 1.94429   | 1.89552   | 2.57037   | 2.6864    |
| RAVER2     | 4.28889   | 4.31441   | 3.50124   | 3.57942   | 3.33262   | 3.28764   |
| RB1        | 5.21903   | 5.44778   | 4.8249    | 5.0779    | 5.76148   | 5.77255   |
| RB1CC1     | 6.6199    | 6.5841    | 6.3193    | 6.54692   | 6.17217   | 6.61716   |
| RBAK       | 4.05915   | 4.01995   | 5.0891    | 5.01013   | 5.26643   | 5.05209   |
| RBBP4      | 7.16825   | 7.06706   | 6.50487   | 6.54838   | 6.98298   | 6.97802   |
| RBBP4P1    | 3.84342   | 3.68595   | 3.3029    | 3.37266   | 3.78729   | 4.16925   |
| RBBP4P2    | 2.71896   | 2.6895    | 2.69248   | 2.62984   | 3.0057    | 2.81929   |
| RBBP5      | 4.46019   | 4.59715   | 4.26769   | 4.63766   | 4.68674   | 4.78415   |
| RBBP6      | 5.33124   | 5.12681   | 5.71167   | 5.68801   | 5.34142   | 4.96039   |
| RBBP7      | 5.32319   | 5.13649   | 6.22522   | 6.49838   | 6.00204   | 5.92102   |
| RBBP8      | 4.59439   | 4.64567   | 3.9509    | 4.26946   | 4.83254   | 5.33562   |
| RBBP9      | 4.6623    | 4.96865   | 4.19152   | 4.59594   | 4.5661    | 5.16132   |
| RBCK1      | 3.52733   | 3.16651   | 4.76702   | 5.00034   | 3.57809   | 3.76496   |
| RBFA       | 3.71238   | 3.88576   | 3.0013    | 3.40877   | 2.46115   | 2.5925    |
| RBFOX2     | 6.13617   | 5.92192   | 6.64718   | 6.53524   | 5.88247   | 5.54002   |
| RBKS       | -0.489437 | -0.332268 | -0.539469 | 0.267967  | 0.427241  | 1.40185   |
| RBL1       | 5.22047   | 5.19884   | 4.42555   | 4.61735   | 4.58283   | 4.43665   |
| RBL2       | 4.85575   | 4.85325   | 5.43641   | 5.61358   | 5.70886   | 5.71736   |
| RBM10      | 4.58576   | 4.44002   | 4.32558   | 4.5527    | 4.11183   | 3.95822   |
| RBM12      | 6.69854   | 6.71019   | 6.27198   | 6.36287   | 6.41371   | 6.36756   |
| RBM12B     | 5.63791   | 5.64775   | 5.76351   | 5.74095   | 5.27443   | 4.94368   |
| RBM12B-AS1 | 1.49572   | 1.38208   | 1.61716   | 1.69856   | 1.2586    | 0.560157  |
| RBM14      | 5.08568   | 5.03619   | 4.68722   | 4.96416   | 4.41886   | 4.25195   |
| RBM14-RBM4 | 2.52768   | 2.33786   | 2.5808    | 2.45538   | 1.85369   | 1.4239    |
| RBM15      | 5.6545    | 5.66412   | 5.53626   | 5.6704    | 5.28535   | 4.9135    |
| RBM15B     | 5.98461   | 5.83362   | 5.34485   | 5.38544   | 5.92823   | 5.27339   |
| RBM17      | 4.9441    | 4.88952   | 4.4512    | 4.58515   | 5.11674   | 4.7371    |
| RBM17P2    | 1.74538   | 1.68265   | -0.573276 | -1.0885   | -0.280936 | -1.67031  |
| RBM17P4    | 0.627261  | 0.649983  | -0.373552 | -0.571723 | 0.553832  | -0.209912 |
| RBM18      | 2.76401   | 3.036     | 2.38864   | 3.05448   | 3.81016   | 4.55402   |
| RBM19      | 4.78543   | 4.79213   | 3.90622   | 4.1809    | 3.87574   | 3.73326   |
| RBM20      | 1.48583   | 1.49719   | 3.29221   | 3.47989   | 0.597155  | 0.719622  |
| RBM22      | 3.88118   | 4.26507   | 3.93412   | 4.39897   | 4.57508   | 4.87164   |
| RBM23      | 4.73721   | 4.43141   | 3.98926   | 4.1214    | 4.67699   | 4.54299   |
| RBM24      | -1.34118  | -1.25306  | 1.53076   | 1.71775   | 3.24658   | 3.87824   |
| RBM25      | 6.39861   | 6.34996   | 5.8594    | 5.93989   | 6.54948   | 5.84342   |
| RBM26      | 5.64755   | 5.71411   | 5.89082   | 5.83567   | 5.59763   | 5.23921   |
| RBM27      | 5.3315    | 5.38825   | 5.37035   | 5.58092   | 5.32204   | 5.25288   |
| RBM28      | 5.53011   | 5.62177   | 5.04244   | 5.31251   | 5.38413   | 5.0351    |
| RBM3       | 6.31754   | 6.4213    | 5.1052    | 5.49153   | 6.16759   | 6.37641   |
| RBM33      | 5.49814   | 5.46455   | 5.68758   | 5.59894   | 5.08703   | 4.84402   |
| RBM34      | 3.80422   | 3.68777   | 3.44947   | 3.70229   | 4.40374   | 5.05257   |
| RBM38      | 1.98432   | 1.76037   | 1.47278   | 1.59227   | 3.5099    | 3.30405   |
| RBM39      | 7.69903   | 7.62356   | 7.58541   | 7.53492   | 7.55521   | 7.41381   |
| RBM4       | 5.62322   | 5.53109   | 5.50868   | 5.58782   | 5.43973   | 5.56739   |
| RBM41      | 3.70499   | 3.61397   | 3.61738   | 3.77076   | 3.55764   | 3.51729   |
| RBM42      | 3.36431   | 3.24452   | 3.54269   | 3.901     | 3.67731   | 3.79711   |
| RBM43      | 1.22578   | 1.02102   | 1.95605   | 1.90801   | 2.52953   | 2.08772   |
| RBM45      | 2.55832   | 2.76839   | 3.4729    | 3.74447   | 2.83155   | 3.44811   |
| RBM47      | -2.05464  | -1.65505  | 2.42382   | 3.37901   | 2.04361   | 2.66833   |

|           |           |           |           |          |           |           |
|-----------|-----------|-----------|-----------|----------|-----------|-----------|
| RBM48     | 3.68569   | 3.79219   | 4.0774    | 4.19381  | 3.32695   | 3.08119   |
| RBM4B     | 3.52378   | 3.54013   | 3.48206   | 3.44195  | 3.15398   | 2.86233   |
| RBM5      | 6.01481   | 5.91203   | 6.07381   | 6.06722  | 6.47941   | 6.01996   |
| RBM5-AS1  | 1.39138   | 1.55659   | 1.69735   | 1.80613  | 2.14171   | 1.25113   |
| RBM6      | 5.92748   | 5.87207   | 5.31442   | 5.33159  | 6.3743    | 5.68918   |
| RBM7      | 2.42409   | 2.18162   | 4.14476   | 4.25297  | 4.25203   | 4.10939   |
| RBM8A     | 5.68468   | 5.33999   | 4.74146   | 4.72836  | 6.04079   | 5.53689   |
| RBM8B     | 3.71645   | 3.33417   | 2.83336   | 2.76294  | 3.95693   | 3.35993   |
| RBMS1     | 5.35167   | 5.43799   | 5.75472   | 5.95097  | 5.66924   | 5.50363   |
| RBMS1P1   | 2.4077    | 2.6458    | 2.46601   | 3.08271  | 2.89584   | 2.94622   |
| RBMS2     | 3.2035    | 2.97558   | 4.46085   | 4.7995   | 3.49499   | 3.27724   |
| RBMS2P1   | 0.246931  | 0.335803  | 1.33675   | 1.90527  | 0.615699  | 0.609689  |
| RBMS3     | 4.13696   | 3.91544   | 3.89995   | 3.60026  | 5.55854   | 5.14112   |
| RBMS3-AS2 | 0.923035  | 0.603321  | 1.22592   | 0.491176 | 1.85935   | 0.650921  |
| RBMX      | 7.50613   | 7.48779   | 7.08788   | 7.29652  | 7.45833   | 7.42444   |
| RBMX2     | 3.3949    | 3.36115   | 3.34874   | 3.6178   | 4.13254   | 4.24639   |
| RBMX2P5   | -0.212365 | 0.170976  | -0.261613 | 0.325997 | 0.729183  | 0.867383  |
| RBMXL1    | 5.686     | 5.73637   | 4.82342   | 4.87021  | 5.12041   | 4.99626   |
| RBMXP2    | 1.97196   | 2.09276   | 1.33895   | 1.67047  | 1.87748   | 1.80199   |
| RBMXP4    | 0.907214  | 1.11223   | 0.597946  | 0.58323  | 1.28724   | 0.870132  |
| RBPJ      | 5.79889   | 5.70532   | 5.58977   | 5.811    | 5.73721   | 5.36579   |
| RBPMS     | 3.89484   | 3.37004   | 3.69656   | 3.51304  | 1.60651   | 1.17598   |
| RBSN      | 4.79727   | 4.89413   | 4.26769   | 4.4245   | 5.35404   | 5.09418   |
| RBX1      | 4.04154   | 4.15829   | 3.70978   | 4.22096  | 3.98354   | 4.34041   |
| RC3H1     | 5.59583   | 5.44103   | 5.55075   | 5.57721  | 5.37928   | 4.91441   |
| RC3H2     | 5.75572   | 5.87087   | 5.71658   | 5.98622  | 6.59416   | 6.77458   |
| RCAN1     | 6.99602   | 6.6053    | 4.07975   | 4.51596  | 5.79527   | 5.83485   |
| RCAN3     | 4.51037   | 4.22715   | 3.32018   | 3.62361  | 4.44363   | 4.26775   |
| RCBTB1    | 3.90269   | 3.95185   | 3.99016   | 4.38501  | 3.58762   | 3.63758   |
| RCBTB2    | 0.243547  | 0.775632  | 1.51695   | 1.85698  | 1.49455   | 2.13251   |
| RCC1      | 5.73791   | 5.78258   | 4.00796   | 4.24413  | 5.67504   | 5.58036   |
| RCC2      | 6.46015   | 6.34932   | 6.0641    | 6.2465   | 7.30194   | 6.87635   |
| RCC2P6    | 1.06751   | 1.00913   | 0.671203  | 0.840967 | 1.93903   | 1.1519    |
| RCCD1     | 3.66833   | 3.62859   | 3.63665   | 3.85963  | 0.134221  | -0.662104 |
| RCE1      | 3.56847   | 3.4396    | 3.27775   | 3.35823  | 3.20821   | 2.76869   |
| RCHY1     | 2.77801   | 2.77078   | 2.25461   | 2.54166  | 4.16283   | 4.09616   |
| RCL1      | 3.37507   | 3.459     | 2.19587   | 2.58467  | 4.18125   | 4.42642   |
| RCN1      | 6.73126   | 6.46025   | 7.66845   | 7.99114  | 7.14807   | 7.00494   |
| RCN1P2    | 5.128     | 4.93983   | 5.89254   | 6.12585  | 5.48645   | 5.39418   |
| RCN2      | 6.36012   | 6.21773   | 5.2088    | 5.52098  | 5.59296   | 5.96349   |
| RCN3      | 3.94838   | 3.70081   | 0.986462  | 0.902467 | -5.65305  | -4.70296  |
| RCOR1     | 4.33503   | 4.35972   | 3.77357   | 3.57942  | 4.35719   | 3.58791   |
| RCOR3     | 4.05078   | 4.04693   | 4.09608   | 3.94509  | 4.22691   | 3.93714   |
| RDH10     | 4.85834   | 5.21735   | 3.73949   | 4.1347   | 3.80158   | 3.53993   |
| RDH10-AS1 | 0.817271  | 0.807462  | 0.374299  | 0.394295 | -0.624626 | -0.976228 |
| RDH11     | 6.50709   | 6.55114   | 5.70528   | 6.05258  | 6.36927   | 6.30615   |
| RDH13     | 1.45069   | 1.51053   | 0.345975  | 0.617552 | 2.5266    | 2.23912   |
| RDH14     | 3.28391   | 3.3267    | 2.30835   | 2.5494   | 3.24808   | 3.80306   |
| RDX       | 6.25731   | 6.2878    | 6.49423   | 6.53413  | 7.32142   | 7.0327    |
| REC8      | 0.133932  | -0.158917 | 0.488988  | 0.399062 | 1.17894   | 0.293394  |
| RECK      | 1.90457   | 1.95924   | 2.89062   | 3.22657  | 4.1235    | 4.39525   |
| RECQL     | 5.58137   | 5.72708   | 5.24045   | 5.76637  | 5.07719   | 5.72305   |

|          |          |          |           |           |           |           |
|----------|----------|----------|-----------|-----------|-----------|-----------|
| RECQL4   | 4.05865  | 3.77283  | 4.09477   | 4.12711   | 3.48639   | 3.28889   |
| RECQL5   | 3.05414  | 2.92086  | 3.74722   | 3.72406   | 3.50585   | 3.03813   |
| REEP2    | 2.53934  | 2.52869  | 0.0645242 | 0.383121  | 2.30837   | 1.80111   |
| REEP3    | 5.8318   | 5.83062  | 5.4818    | 5.79429   | 5.68036   | 5.22401   |
| REEP4    | 3.1417   | 3.04891  | 3.32229   | 3.52054   | 2.46124   | 2.10066   |
| REEP5    | 5.31535  | 5.84481  | 5.68769   | 6.42454   | 6.06678   | 7.0605    |
| REL      | 4.67929  | 4.67774  | 3.84122   | 3.77129   | 3.69695   | 3.17337   |
| RELA     | 4.39235  | 4.39357  | 3.67446   | 3.91215   | 3.86129   | 3.93353   |
| RELB     | 3.10506  | 3.17921  | 0.914572  | 1.55655   | 0.871134  | 0.922708  |
| RELL1    | 2.97577  | 2.98056  | 2.7835    | 3.11759   | 2.6422    | 2.33775   |
| RELL2    | 1.42949  | 1.21761  | 2.48377   | 2.58798   | 2.1259    | 2.14753   |
| RELT     | 3.99266  | 3.90674  | 3.02105   | 3.23103   | 3.22691   | 3.17593   |
| REPIN1   | 4.83812  | 4.62661  | 6.0256    | 6.26296   | 5.65736   | 5.39      |
| REPS1    | 3.72844  | 3.78328  | 3.79265   | 3.86747   | 4.16778   | 3.99036   |
| REPS2    | -0.52896 | 0.181128 | 2.29627   | 2.91354   | -2.20023  | -0.247123 |
| RER1     | 5.46259  | 5.42753  | 5.55296   | 5.93475   | 6.5399    | 6.85287   |
| RERE     | 3.93754  | 3.74416  | 4.27076   | 3.88834   | 4.69372   | 4.4481    |
| REST     | 5.50945  | 5.51978  | 5.50777   | 5.46906   | 6.18242   | 5.80896   |
| RETSAT   | 4.06661  | 3.98423  | 4.19569   | 4.66101   | 4.25481   | 4.39909   |
| REV1     | 4.86418  | 4.95345  | 4.59713   | 4.49717   | 4.92624   | 4.93846   |
| REV3L    | 5.54666  | 5.48922  | 5.52744   | 5.49969   | 5.82046   | 5.85855   |
| REXO1    | 2.21529  | 1.70287  | 1.87112   | 1.95908   | 2.92827   | 2.37264   |
| REXO2    | 2.93574  | 2.84255  | 4.40612   | 4.82854   | 4.13151   | 4.39394   |
| REXO4    | 3.4918   | 3.38398  | 3.02554   | 3.43797   | 4.03378   | 3.89841   |
| RFC1     | 5.37539  | 5.44855  | 5.19151   | 5.50264   | 6.29932   | 6.46726   |
| RFC2     | 4.41009  | 4.41444  | 4.06796   | 4.55385   | 4.9119    | 5.05233   |
| RFC3     | 5.56067  | 5.50835  | 4.59782   | 4.79127   | 4.97042   | 4.87636   |
| RFC4     | 4.27101  | 4.33805  | 4.24063   | 4.56888   | 4.75279   | 4.95327   |
| RFC5     | 5.26417  | 5.25638  | 3.72574   | 4.16072   | 4.4082    | 4.82759   |
| RFFL     | 4.32456  | 4.33166  | 4.57498   | 4.8444    | 4.73541   | 4.60076   |
| RFK      | 3.84201  | 3.92301  | 2.25944   | 2.78297   | 4.19612   | 4.18202   |
| RFNG     | 2.92774  | 2.57321  | 2.68154   | 2.69353   | 3.85761   | 3.49752   |
| RFT1     | 4.17624  | 4.1792   | 4.21522   | 4.56888   | 4.08452   | 4.26482   |
| RFTN1    | 3.77361  | 3.9122   | 4.33807   | 4.53231   | 0.458718  | 0.541297  |
| RFTN2    | 1.83233  | 1.3251   | -0.659745 | -0.938639 | 0.159978  | -0.619042 |
| RFWD2    | 4.68838  | 4.7545   | 4.33012   | 4.54567   | 4.37515   | 4.97364   |
| RFWD3    | 6.08741  | 6.07654  | 5.53373   | 5.86737   | 5.04142   | 4.92354   |
| RFX1     | 0.409538 | 0.265185 | 0.986462  | 0.632724  | 0.437814  | 0.719622  |
| RFX2     | 1.49539  | 1.50874  | 1.89865   | 2.10036   | 1.69286   | 1.03481   |
| RFX3     | 3.81169  | 3.93589  | 2.70827   | 2.29207   | 4.77795   | 4.72268   |
| RFX5     | 5.61237  | 5.52158  | 4.56467   | 4.93965   | 5.23414   | 5.38205   |
| RFX7     | 4.98478  | 4.89743  | 4.72784   | 4.54132   | 4.84052   | 4.67914   |
| RFXANK   | 3.3513   | 3.01625  | 3.16305   | 3.24727   | 3.24897   | 3.57151   |
| RFXAP    | 1.20183  | 1.09179  | 1.77651   | 1.35065   | 1.27637   | 0.50283   |
| RGL1     | 4.15813  | 4.19178  | 4.81151   | 4.84318   | 4.4397    | 4.53407   |
| RGL2     | 3.51443  | 3.39558  | 3.53562   | 3.60616   | 4.2526    | 4.52415   |
| RGL3     | 0.776727 | 0.395227 | 0.73541   | 0.57776   | 0.69732   | -0.151977 |
| RGL4     | 0.536888 | 0.597374 | 0.579943  | 0.327239  | -0.536373 | -1.08738  |
| RGMA     | -0.74582 | -1.24705 | -2.01303  | -1.30113  | 2.99945   | 2.5173    |
| RGMB     | 5.3136   | 5.37846  | 3.4177    | 3.61519   | 6.05497   | 5.97524   |
| RGMB-AS1 | 2.05536  | 2.23852  | -0.999455 | -0.693159 | 2.03129   | 1.65736   |
| RGP1     | 4.85981  | 4.66707  | 4.58382   | 4.89749   | 6.10767   | 5.87003   |

|         |          |           |            |           |           |           |
|---------|----------|-----------|------------|-----------|-----------|-----------|
| RGPD3   | 0.590444 | 0.4456    | -0.146011  | 0.0100637 | 0.242889  | -0.115894 |
| RGPD5   | 5.22533  | 5.16847   | 4.43856    | 4.13508   | 5.14637   | 4.91914   |
| RGPD6   | 5.41198  | 5.2373    | 4.26669    | 4.45044   | 5.21153   | 4.73979   |
| RGPD8   | 4.76495  | 4.5911    | 3.11716    | 2.86144   | 4.40777   | 4.30283   |
| RGS10   | 1.54413  | 1.46201   | 1.7707     | 1.87419   | 0.954457  | 1.60621   |
| RGS12   | 2.79278  | 2.64569   | 3.52728    | 3.34445   | 2.98715   | 2.80504   |
| RGS14   | 0.159022 | -0.122853 | 2.07389    | 2.36692   | 2.86913   | 3.41741   |
| RGS16   | 3.99962  | 3.82602   | -5.1783    | -4.10635  | -5.65305  | -3.70484  |
| RGS17   | 4.14471  | 4.16924   | 3.66979    | 3.88623   | 3.02269   | 2.79314   |
| RGS19   | 2.35078  | 2.30866   | 1.46038    | 1.97866   | 1.89813   | 2.70269   |
| RGS2    | 1.13386  | 0.894767  | 4.20341    | 3.17426   | 3.16941   | 3.5076    |
| RGS20   | 2.08558  | 2.12214   | 1.42385    | 1.77384   | 0.86332   | 0.878317  |
| RGS3    | 2.78071  | 2.19539   | 3.8235     | 4.44192   | 3.84251   | 4.31425   |
| RGS4    | -0.94393 | 0.456112  | -5.1783    | -6.09892  | 5.79782   | 6.92671   |
| RGS5    | 1.74803  | 1.9295    | 1.84993    | 1.7241    | 1.84354   | 2.25331   |
| RGS7    | 0.266817 | -0.253233 | -3.37468   | -4.52056  | 1.43249   | 0.847941  |
| RHBDD1  | 1.49078  | 1.23764   | 1.46038    | 1.65939   | 3.62046   | 3.38074   |
| RHBDD2  | 3.8507   | 3.72079   | 4.12253    | 4.43517   | 3.93308   | 4.11983   |
| RHBDD3  | 2.61154  | 2.42895   | 3.14341    | 3.17889   | 2.19146   | 1.92993   |
| RHBDF1  | 3.18509  | 2.95079   | 3.73831    | 3.85984   | 2.44561   | 1.80111   |
| RHBDF2  | 0.792839 | 0.920918  | 2.94319    | 3.35469   | -0.450674 | -0.799586 |
| RHBDL2  | 2.20001  | 2.58121   | 1.16299    | 1.20195   | -1.71976  | -2.12114  |
| RHBDL3  | -1.8912  | -2.00285  | 1.98141    | 2.26188   | -2.65941  | -2.8983   |
| RHEB    | 4.56268  | 4.58502   | 4.34526    | 4.76506   | 5.51519   | 5.90058   |
| RHEBL1  | 1.36705  | 1.54842   | 0.102      | 0.445854  | -0.490197 | -0.497069 |
| RHEBP1  | 3.88193  | 3.79766   | 3.55567    | 4.06305   | 4.67128   | 5.41451   |
| RHEBP2  | 2.45275  | 2.94418   | 2.18866    | 2.91259   | 3.49805   | 3.23722   |
| RHNO1   | 4.03985  | 4.48407   | 3.89862    | 4.53502   | 3.50461   | 3.81685   |
| RHOA    | 7.21978  | 7.15104   | 6.88307    | 7.18106   | 7.6284    | 7.66629   |
| RHOB    | 3.60356  | 3.22541   | 2.53759    | 3.03584   | 7.19006   | 7.39049   |
| RHOBTB1 | 2.17438  | 2.15922   | 2.66198    | 2.39501   | 4.09874   | 3.908     |
| RHOBTB2 | 3.3901   | 3.49796   | 3.20389    | 3.45281   | 2.73291   | 2.84624   |
| RHOBTB3 | 5.17588  | 4.9887    | 6.73594    | 7.0786    | 5.73067   | 5.76981   |
| RHOC    | 6.77934  | 6.54023   | 5.77827    | 6.15384   | 7.21907   | 7.18062   |
| RHOF    | 2.12549  | 2.08076   | -0.737733  | -0.54701  | -1.04237  | -1.05508  |
| RHOG    | 3.21081  | 2.91221   | 2.65884    | 3.07357   | 3.52334   | 3.33221   |
| RHOJ    | 4.47145  | 4.5678    | -5.1783 ?  |           | 3.9754    | 3.77911   |
| RHOQ    | 5.47876  | 5.34749   | 4.43447    | 4.66624   | 5.45507   | 5.62054   |
| RHOQP1  | 1.48229  | 1.32608   | -0.69519   | -0.765692 | 0.184725  | -0.22789  |
| RHOQP2  | 1.30453  | 1.30354   | 0.25021    | 0.093479  | 1.45716   | 1.38312   |
| RHOQP3  | 1.29276  | 1.18616   | -0.0953502 | 0.555247  | 1.2       | 1.71934   |
| RHOT1   | 4.32121  | 4.38227   | 3.90063    | 4.12908   | 4.60725   | 4.87438   |
| RHOT1P1 | -0.22289 | -0.169477 | -0.15956   | 0.147945  | 0.333893  | 0.53833   |
| RHOT2   | 4.19952  | 3.80394   | 4.13049    | 4.16613   | 4.25183   | 4.21661   |
| RHOU    | 2.29246  | 2.32833   | -2.27595   | -2.10822  | -0.705893 | -0.214706 |
| RHPN1   | 1.43024  | 1.17383   | -1.48269   | -1.30113  | 0.416602  | 0.0483059 |
| RHPN2   | 3.22102  | 3.22866   | 2.98123    | 3.22621   | 4.57431   | 4.42501   |
| RIC1    | 4.89248  | 4.82824   | 5.04394    | 5.07945   | 6.12258   | 6.02044   |
| RIC8A   | 5.79627  | 5.8602    | 5.87886    | 6.28375   | 5.78106   | 5.98938   |
| RIC8B   | 4.19102  | 4.2201    | 3.41998    | 3.64083   | 4.23751   | 4.33754   |
| RICTOR  | 5.28205  | 5.35789   | 6.07281    | 6.10784   | 5.41428   | 5.68122   |
| RIF1    | 7.70897  | 7.76618   | 7.15977    | 7.27519   | 7.52317   | 7.66027   |

|           |           |           |            |            |           |           |
|-----------|-----------|-----------|------------|------------|-----------|-----------|
| RILPL1    | 1.57599   | 1.45864   | 1.8513     | 1.57118    | 2.08163   | 1.26907   |
| RILPL2    | 2.55596   | 2.23761   | 2.91617    | 3.19952    | 1.61119   | 1.46325   |
| RIMBP3    | -0.514596 | -0.729289 | 0.968762   | 1.16125    | -1.50594  | -1.53035  |
| RIMKLA    | 2.61381   | 2.46791   | -2.09546   | -2.30078   | 1.75757   | 0.293394  |
| RIMKLB    | -1.37679  | -1.37502  | 4.42422    | 4.3302     | 2.69442   | 2.19114   |
| RIMKLBP2  | -0.026521 | -0.122851 | 1.06446    | 1.1104     | 0.121175  | -0.752286 |
| RIMS3     | 1.33439   | 1.08411   | 1.13846    | 1.26626    | 0.871134  | 0.769095  |
| RIN1      | 2.76617   | 2.71707   | 2.00632    | 2.53143    | 0.679613  | 1.33772   |
| RIN2      | 3.43405   | 3.47525   | 4.74573    | 5.37449    | 4.55705   | 5.13798   |
| RIN3      | 2.26672   | 2.04497   | 0.120378   | 0.57776    | 1.5246    | 1.67702   |
| RING1     | 3.09209   | 3.20605   | 2.14741    | 2.46862    | 3.95715   | 4.13091   |
| RINT1     | 4.40484   | 4.50267   | 4.07811    | 4.39736    | 4.74953   | 5.16436   |
| RIOK1     | 3.61267   | 3.58693   | 2.3478     | 2.71117    | 4.0845    | 4.20765   |
| RIOK2     | 3.60811   | 3.9216    | 4.05873    | 4.67857    | 3.90294   | 4.72127   |
| RIOK3     | 4.61266   | 4.73682   | 4.20557    | 4.73116    | 4.71255   | 4.82563   |
| RIPK1     | 3.82447   | 4.034     | 3.97761    | 4.37297    | 4.76386   | 5.00665   |
| RIPK2     | 3.60812   | 3.57057   | 2.25944    | 2.72723    | 3.22539   | 3.62867   |
| RIPK4     | 2.04241   | 2.06004   | 2.11571    | 2.46861    | -5.07051  | -3.52416  |
| RIT1      | 4.27174   | 4.06071   | 4.51431    | 4.77762    | 5.15227   | 5.32463   |
| RITA1     | 3.02715   | 2.95291   | 2.47827    | 2.89681    | 3.17889   | 3.21513   |
| RLF       | 5.23239   | 5.22408   | 5.16187    | 5.36993    | 5.96082   | 5.97363   |
| RLIM      | 6.49695   | 6.68394   | 6.46621    | 6.89416    | 7.20644   | 7.28933   |
| RMDN1     | 3.98005   | 4.03376   | 4.14527    | 4.20185    | 4.58422   | 5.06832   |
| RMDN2     | 2.44814   | 2.73684   | 0.120378   | 0.46112    | 1.2881    | 2.67267   |
| RMDN3     | 4.18586   | 4.09652   | 3.48003    | 3.7288     | 3.58405   | 3.55539   |
| RMI1      | 3.00136   | 2.9187    | 3.60602    | 3.60884    | 2.5805    | 2.36476   |
| RMI2      | 2.96271   | 2.74418   | 2.88795    | 2.93283    | 0.969108  | 0.68568   |
| RMND1     | 2.84202   | 2.9013    | 2.08796    | 2.47615    | 3.62971   | 3.95861   |
| RMND5A    | 5.65047   | 5.85059   | 4.07385    | 4.64436    | 5.35158   | 5.43151   |
| RMND5B    | 3.92156   | 3.86804   | 3.30068    | 3.34778    | 4.40904   | 4.26043   |
| RMRP      | 11.2675   | 11.1141   | 11.2484    | 11.521     | 11.3558   | 12.0937   |
| RN7SK     | 13.6472   | 13.3683   | 13.114     | 13.3388    | 13.2563   | 14.4542   |
| RN7SKP162 | 1.2317    | 1.5759    | 0.558032   | 1.23995    | 1.58765   | 2.27058   |
| RN7SKP176 | 2.14911   | 2.07443   | 1.74414    | 2.15134    | 1.61483   | 3.40163   |
| RN7SKP180 | -0.445832 | -0.161839 | -0.0550636 | 0.0722568  | -0.955189 | 0.914679  |
| RN7SKP203 | 5.72855   | 5.74327   | 5.53354    | 5.8551     | 5.31797   | 6.72825   |
| RN7SKP255 | 3.75081   | 3.82722   | 3.6668     | 3.94749    | 3.61615   | 4.64468   |
| RN7SKP71  | 5.83816   | 6.00095   | 5.69557    | 5.96455    | 5.63259   | 6.56786   |
| RN7SKP80  | 5.71243   | 5.87519   | 5.31447    | 5.77749    | 5.49897   | 6.60345   |
| RN7SKP9   | 4.09799   | 4.3232    | 3.60479    | 4.20416    | 4.52289   | 4.89774   |
| RN7SKP90  | -0.233552 | 0.15156   | -0.57245   | -0.0676833 | -0.135304 | 1.15718   |
| RN7SKP91  | 1.76038   | 1.55956   | 0.976408   | 1.65276    | 2.19769   | 2.22404   |
| RN7SKP97  | -1.08408  | -1.2146   | 1.2174     | 1.14862    | -0.594016 | -1.18284  |
| RN7SL1    | 14.342    | 14.1584   | 13.5182    | 13.9583    | 14.746    | 15.822    |
| RN7SL128P | 0.431345  | 1.04541   | 0.609642   | 0.906398   | 0.825753  | 1.59016   |
| RN7SL396P | 0.273456  | 0.638825  | 0.417877   | 0.465933   | 0.840451  | 1.58156   |
| RN7SL4P   | 7.71352   | 8.05887   | 7.65946    | 7.90616    | 8.27759   | 8.69622   |
| RN7SL5P   | 7.04343   | 7.44384   | 6.80193    | 7.18637    | 7.50909   | 8.48928   |
| RN7SL674P | 1.85429   | 2.07453   | 1.62847    | 1.94915    | 2.27799   | 3.29729   |
| RN7SL767P | -0.033385 | 0.81078   | -0.242767  | -0.0284929 | 0.563685  | 1.46409   |
| RNA5-8S5  | 9.29747   | 8.34173   | 8.79215    | 8.16054    | 8.71187   | 7.81189   |
| RNASEH1   | 3.95549   | 3.91575   | 2.89718    | 3.43644    | 4.41647   | 4.57949   |

|             |          |           |          |            |           |           |
|-------------|----------|-----------|----------|------------|-----------|-----------|
| RNASEH1-AS1 | 1.87459  | 1.73194   | 0.355738 | 0.736735   | 1.15992   | 1.68564   |
| RNASEH1P2   | 0.763148 | 0.825973  | 0.34864  | 0.700262   | 1.47148   | 1.30052   |
| RNASEH2A    | 3.98743  | 4.02899   | 3.44947  | 3.83076    | 3.97993   | 4.2848    |
| RNASEH2B    | 3.56301  | 3.57469   | 2.28002  | 2.375      | 3.3298    | 4.09418   |
| RNASEH2C    | 4.56836  | 4.61859   | 4.30701  | 4.65602    | 4.22824   | 4.54062   |
| RNASEK      | 4.01652  | 3.76202   | 3.71291  | 4.01451    | 4.86673   | 4.96045   |
| RNASEL      | 2.80077  | 2.90567   | 2.73832  | 3.11518    | 2.0227    | 2.14505   |
| RNASET2     | 0.367103 | 0.432061  | 1.01407  | 1.34506    | 2.212     | 2.30453   |
| RND3        | 5.5485   | 5.56884   | 3.64777  | 4.65104    | 5.83702   | 6.86265   |
| RNF10       | 4.70976  | 4.52228   | 4.53243  | 4.63768    | 5.23375   | 5.03475   |
| RNF103      | 3.72078  | 3.69023   | 3.65926  | 3.66625    | 3.91025   | 3.75167   |
| RNF11       | 5.07652  | 5.15966   | 5.16409  | 5.67579    | 5.78261   | 5.82369   |
| RNF111      | 4.22498  | 4.20337   | 4.33217  | 4.36892    | 4.35579   | 4.02799   |
| RNF113A     | 1.277    | 1.44523   | 2.28596  | 2.7312     | 3.27151   | 3.44887   |
| RNF114      | 5.40845  | 5.40325   | 5.30982  | 5.84535    | 5.66919   | 5.63645   |
| RNF115      | 4.58692  | 4.7398    | 4.95218  | 5.16941    | 5.4352    | 5.4493    |
| RNF121      | 4.48825  | 4.61062   | 4.08208  | 4.22879    | 3.81745   | 3.69629   |
| RNF123      | 3.95714  | 3.82614   | 3.43174  | 3.72634    | 4.44721   | 4.18994   |
| RNF125      | 3.41206  | 3.43803   | -4.59508 | -4.10635 ? |           | -5.69922  |
| RNF126      | 1.99791  | 1.7171    | 1.41643  | 1.76157    | 3.10291   | 3.08676   |
| RNF128      | 4.5201   | 4.85907 ? |          | -5.10387   | -6.64581  | -5.69922  |
| RNF13       | 4.40493  | 4.47045   | 4.82593  | 4.98677    | 4.47863   | 4.77816   |
| RNF130      | 4.35279  | 4.17803   | 4.52194  | 4.61823    | 4.9566    | 4.97876   |
| RNF135      | 2.17438  | 2.04497   | 2.46755  | 2.82488    | 1.77435   | 2.2062    |
| RNF138      | 4.1763   | 4.29493   | 3.5989   | 3.74146    | 3.20169   | 3.05403   |
| RNF138P1    | 0.714303 | 0.742153  | 2.24423  | 1.85082    | 0.0868381 | 0.507607  |
| RNF139      | 4.10424  | 4.2937    | 3.64779  | 4.02688    | 4.92276   | 5.55184   |
| RNF139-AS1  | 1.78476  | 1.89913   | 1.73537  | 1.79207    | 1.29974   | 0.97985   |
| RNF14       | 4.38299  | 4.44762   | 4.35461  | 4.68628    | 4.96578   | 5.47189   |
| RNF141      | 3.32744  | 3.19873   | 4.28179  | 4.40292    | 3.51811   | 3.59699   |
| RNF144A     | 4.59496  | 4.32668   | 1.25116  | 0.761609   | 0.597155  | 0.578775  |
| RNF144B     | 1.36705  | 1.23069   | -3.18222 | -2.64851   | 1.7868    | 2.0681    |
| RNF145      | 6.49839  | 6.408     | 5.96127  | 6.40211    | 6.79275   | 6.94451   |
| RNF146      | 3.14954  | 3.35255   | 3.53244  | 3.61568    | 3.89331   | 4.05483   |
| RNF149      | 4.38107  | 4.74172   | 2.87177  | 3.31744    | 3.80729   | 3.87637   |
| RNF150      | 4.92159  | 4.86358   | 1.61741  | 0.591699   | 4.94747   | 4.4031    |
| RNF152      | 2.51038  | 2.66128   | 5.23379  | 4.88198    | -1.65987  | -2.70579  |
| RNF157      | 3.84133  | 3.80281   | 0.385365 | 0.383121   | 4.17109   | 3.88899   |
| RNF166      | 1.72721  | 1.41984   | 2.13842  | 2.36692    | 1.52955   | 1.15132   |
| RNF167      | 4.18907  | 4.10654   | 4.05876  | 4.24435    | 5.16257   | 5.3475    |
| RNF168      | 5.08266  | 5.03748   | 5.21573  | 5.35214    | 6.37958   | 5.90935   |
| RNF169      | 6.24739  | 6.27419   | 5.49352  | 5.64675    | 5.14467   | 4.94672   |
| RNF170      | 2.95913  | 3.05483   | 3.31832  | 3.28778    | 2.63432   | 2.87825   |
| RNF175      | -5.69162 | -3.13966  | 2.02107  | 2.23992    | 0.0677351 | -0.121607 |
| RNF181      | 3.66833  | 3.75925   | 3.63572  | 4.20502    | 4.25781   | 4.97627   |
| RNF182      | 3.77968  | 3.86246   | -1.65952 | -0.823182  | 4.90809   | 4.82465   |
| RNF185      | 3.89527  | 3.91785   | 3.62532  | 3.93116    | 3.61775   | 4.07437   |
| RNF187      | 4.64298  | 4.68626   | 4.44034  | 4.72959    | 4.75116   | 4.84787   |
| RNF19A      | 5.25627  | 5.49713   | 4.52325  | 4.83697    | 5.51213   | 5.35843   |
| RNF19B      | 2.84976  | 3.07243   | 2.20451  | 2.6225     | 3.30547   | 3.60389   |
| RNF2        | 3.60812  | 3.8836    | 2.8193   | 3.16497    | 3.88078   | 4.27912   |
| RNF20       | 5.33982  | 5.46047   | 4.867    | 5.23601    | 5.05608   | 5.04482   |

|          |          |          |           |           |           |           |
|----------|----------|----------|-----------|-----------|-----------|-----------|
| RNF213   | 7.72891  | 7.60915  | 8.08007   | 8.09908   | 7.83203   | 7.59266   |
| RNF214   | 3.33958  | 3.27312  | 3.26483   | 3.37103   | 3.32002   | 3.11323   |
| RNF215   | 3.57148  | 3.52325  | 3.34473   | 3.33304   | 2.75562   | 2.74472   |
| RNF216   | 5.37223  | 5.27641  | 5.71388   | 5.80272   | 5.58926   | 5.28625   |
| RNF216P1 | 3.20396  | 3.08641  | 3.75472   | 3.68812   | 3.45612   | 3.18446   |
| RNF217   | 4.54093  | 4.31978  | 3.96588   | 4.18738   | 6.4583    | 5.81325   |
| RNF219   | 4.20288  | 4.3612   | 3.83187   | 4.21441   | 3.3966    | 4.05761   |
| RNF220   | 4.42975  | 4.17429  | 4.15279   | 4.41802   | 4.95975   | 4.71129   |
| RNF24    | 4.3121   | 4.3386   | 6.74148   | 6.96602   | 5.01385   | 4.5712    |
| RNF25    | 3.09739  | 3.2798   | 2.85284   | 3.53147   | 3.73094   | 4.06513   |
| RNF26    | 4.30934  | 3.92409  | 4.59043   | 4.72722   | 3.87884   | 3.60389   |
| RNF31    | 3.549    | 3.25949  | 3.05306   | 3.17986   | 3.89407   | 3.7623    |
| RNF32    | 0.870345 | 0.883793 | 1.16142   | 0.942301  | 0.0959109 | -0.478501 |
| RNF34    | 4.53667  | 4.66777  | 3.82991   | 4.09396   | 4.54368   | 4.46974   |
| RNF38    | 3.69644  | 3.4575   | 3.93541   | 3.92323   | 4.96858   | 4.62531   |
| RNF4     | 5.16696  | 5.16196  | 4.75768   | 5.2413    | 5.99436   | 5.92091   |
| RNF40    | 5.65863  | 5.62654  | 5.46711   | 5.8262    | 5.69282   | 5.38425   |
| RNF41    | 4.65405  | 4.66514  | 3.43487   | 3.82928   | 4.61696   | 4.71429   |
| RNF44    | 1.91565  | 1.74664  | 2.40521   | 2.49852   | 2.69945   | 2.56008   |
| RNF5     | 3.0811   | 3.14017  | 2.63102   | 3.09001   | 4.33097   | 4.78142   |
| RNF5P1   | 0.656094 | 1.03174  | 0.646494  | 0.982313  | 2.1481    | 2.48656   |
| RNF6     | 4.42292  | 4.69499  | 4.71355   | 5.34641   | 4.96308   | 5.31425   |
| RNF7     | 3.72642  | 3.70031  | 3.93454   | 4.24438   | 4.65974   | 5.13425   |
| RNF8     | 3.93009  | 3.9233   | 3.25527   | 3.28134   | 3.93579   | 3.96571   |
| RNFT1    | 3.26393  | 3.18992  | 2.88199   | 2.87369   | 3.71578   | 4.32117   |
| RNFT2    | 3.584    | 3.81444  | 1.88797   | 2.17196   | 3.46897   | 2.97277   |
| RNGTT    | 5.13382  | 5.15278  | 4.05846   | 4.22655   | 5.12637   | 5.07054   |
| RNH1     | 4.91884  | 4.78567  | 5.16464   | 5.47189   | 4.68398   | 5.25183   |
| RNMT     | 4.51158  | 4.44704  | 4.36143   | 4.43999   | 5.48594   | 5.48742   |
| RNMTL1   | 2.78729  | 2.8148   | 2.68618   | 3.06185   | 3.364     | 3.42606   |
| RNPC3    | 3.40145  | 3.38083  | 3.86531   | 3.81217   | 3.66749   | 3.5493    |
| RNPEP    | 4.04872  | 4.08427  | 3.68695   | 4.19142   | 4.56911   | 4.82038   |
| RNPEPL1  | 3.28819  | 2.68691  | 3.20018   | 2.99446   | 3.56368   | 3.70903   |
| RNPS1    | 5.25993  | 5.29932  | 5.02043   | 5.16813   | 5.47049   | 5.22613   |
| RNPS1P1  | 2.80884  | 2.73521  | 2.26774   | 2.53264   | 2.92289   | 2.96594   |
| RNU1-1   | 6.6125   | 6.4312   | 6.52812   | 6.3927    | 6.57926   | 6.85869   |
| RNU1-2   | 6.89745  | 6.85432  | 6.99507   | 6.91019   | 6.64332   | 6.9632    |
| RNU1-27P | 6.7597   | 6.89972  | 7.14611   | 6.95      | 6.7922    | 6.96023   |
| RNU1-28P | 6.66044  | 6.46355  | 6.52046   | 6.43593   | 6.61293   | 6.93439   |
| RNU1-3   | 6.7543   | 6.52954  | 6.48938   | 6.31367   | 6.62629   | 7.03233   |
| RNU1-4   | 6.84748  | 6.99164  | 6.99877   | 6.99843   | 6.64332   | 7.07237   |
| RNU11    | 1.46083  | 1.44408  | 0.871828  | 0.89124   | 1.01217   | 1.17598   |
| RNU12    | 3.74385  | 3.53574  | 3.57636   | 3.48736   | 2.8554    | 3.18203   |
| RNU2-1   | 5.49874  | 5.50761  | 4.88793   | 4.95119   | 5.44791   | 6.35161   |
| RNU2-2P  | 8.57217  | 8.46433  | 8.3861    | 8.34322   | 7.85194   | 8.47698   |
| RNU4-1   | 5.42147  | 5.31111  | 4.74647   | 4.44959   | 4.50081   | 4.65083   |
| RNU4-2   | 5.76443  | 5.77734  | 5.45716   | 5.43999   | 5.08452   | 5.71429   |
| RNU5A-1  | 0.9009   | 1.09179  | 1.0357    | 1.12005   | 0.740643  | 1.1007    |
| RNU5A-8P | 0.81669  | 0.592522 | -0.183372 | -0.086319 | 0.539452  | 0.401903  |
| RNU5E-1  | 1.44562  | 1.67161  | 1.77651   | 1.45345   | -1.57243  | -1.24695  |
| RNU6ATAC | 1.01523  | 0.955067 | -0.161006 | 0.0811214 | 0.661695  | 0.752791  |
| RNVU1-18 | 6.82767  | 6.59075  | 6.41731   | 6.45998   | 6.57099   | 6.91852   |



|                |             |             |            |            |             |             |
|----------------|-------------|-------------|------------|------------|-------------|-------------|
| RNVU1-7        | 6.66035     | 6.43124     | 6.44993    | 6.34825    | 6.52407     | 6.80359     |
| RNY1           | 3.71561     | 3.78508     | 1.0357     | 1.57771    | 3.84152     | 3.5003      |
| ROBO1          | 7.07133     | 6.8449      | 6.55435    | 6.41668    | 6.41701     | 6.34109     |
| ROBO2          | 1.26675     | 1.31856     | -4.59508   | -6.09892 ? | ?           |             |
| ROBO3          | 2.36163     | 2.15923     | 2.60765    | 2.87417    | -1.23372    | -0.799586   |
| ROCK1          | 5.5126      | 5.60907     | 5.31083    | 5.53176    | 5.52007     | 5.72175     |
| ROCK2          | 7.13447     | 6.8499      | 6.11853    | 6.1809     | 6.44163     | 6.08851     |
| ROGDI          | 1.37778     | 1.21668     | 2.13842    | 2.23549    | 1.57813     | 1.1007      |
| ROM1           | -0.00343481 | -0.288791   | 2.00194    | 2.13309    | 1.17637     | 2.16667     |
| ROMO1          | 4.24636     | 4.14818     | 3.55288    | 3.9826     | 4.26968     | 5.29961     |
| ROR1           | 1.37242     | 1.18106     | 2.78803    | 3.01789    | -0.00196773 | -0.799584   |
| RORA           | 0.452342    | 0.736899    | 2.02206    | 1.8512     | 0.273731    | 0.100762    |
| RORB           | 0.219896    | 0.514521    | -6.17309   | -5.10387   | 1.29974     | 1.88577     |
| ROS1           | -0.654472   | -1.00314    | -3.01245   | -3.71618   | 1.35654     | 1.36138     |
| RP1-101D8.1    | -1.74441    | -1.93875    | 1.27595    | 1.38307 ?  | ?           |             |
| RP1-102E24.8   | 0.832372    | 0.581631    | 0.860939   | 0.786061   | -2.75246    | -3.38329    |
| RP1-102K2.8    | 1.64112     | 2.00199     | -2.41335   | -3.47367   | -3.62902    | -3.34884    |
| RP1-117O3.2    | 0.551767    | 0.492263    | -0.109062  | -0.0247734 | 0.0734775   | -0.899103   |
| RP1-121G13.3   | -0.388639   | 0.111499    | -0.028025  | 0.179244   | 0.737955    | 0.83733     |
| RP1-136J15.5   | -0.15637    | 0.0959109   | 0.0900811  | 0.538528   | 0.971869    | 0.834501    |
| RP1-140K8.5    | -0.0407343  | 0.635262    | -0.659745  | 0.231137   | 1.23456     | 1.32676     |
| RP1-145M24.1   | 1.03569     | 1.12967     | -0.276471  | 0.414828   | 1.04711     | 1.53173     |
| RP1-151F17.2   | -0.0407343  | 0.0291348   | 0.976408   | 0.845438   | 0.147163    | -0.0627204  |
| RP1-152L7.5    | -6.68418    | -4.87366    | 3.13389    | 3.20179    | 2.09125     | 1.80111     |
| RP1-159A19.3   | 2.38273     | 2.42323     | 0.734586   | 1.40168    | 2.82721     | 3.08498     |
| RP1-159M24.1   | 3.14712     | 3.23472     | 1.69341    | 2.16411    | 2.84542     | 2.67091     |
| RP1-179N16.3   | 0.399051    | 0.656176    | 0.636738   | 0.798133   | 0.339787    | 0.0747657   |
| RP1-193H18.2   | -0.144345   | -0.00328298 | 1.04535    | 0.761609   | 1.19772     | 1.40185     |
| RP1-203P18.1   | 0.406918    | -0.120274   | 0.240949   | 0.407026   | -0.41573    | -0.174478   |
| RP1-228H13.5   | 0.727258    | 1.60328     | -0.428455  | 0.100749   | 0.270529    | 0.100762    |
| RP1-232L22_B.1 | 0.382036    | 0.195688    | 1.98174    | 2.52139    | 0.511134    | 1.19147     |
| RP1-239B22.5   | 2.21682     | 1.79457     | -1.86109   | -1.10853   | 1.1471      | -0.00614162 |
| RP1-241P17.4   | 2.84628     | 2.78688     | 2.6744     | 3.0173     | 4.03478     | 4.48183     |
| RP1-253P7.4    | 0.50068     | 0.181128    | 0.904002   | 0.659431   | 1.66165     | 0.50283     |
| RP1-261D10.1   | 0.271999    | 0.537236    | 0.681017   | 0.871      | 1.27292     | 1.58154     |
| RP1-267D11.6   | 0.61206     | 0.666511    | 0.510982   | 0.625981   | -0.0163223  | -0.151977   |
| RP1-273G13.2   | 1.29777     | 1.52319     | 0.830718   | 1.17704    | 1.14473     | 1.88351     |
| RP1-278E11.3   | 3.79225     | 3.92024     | 3.36484    | 3.9162     | 4.56903     | 5.11921     |
| RP1-283E3.4    | 0.4795      | 0.449905    | 1.52445    | 1.64698    | 1.37645     | 0.293382    |
| RP1-283E3.8    | 2.3665      | 2.19998     | 2.7776     | 2.73848    | 3.07983     | 1.87967     |
| RP1-292B18.1   | 1.87579     | 1.61954     | 0.881359   | 1.03591    | 2.32117     | 2.98368     |
| RP1-305B16.3   | 0.301026    | 0.382745    | -0.757028  | -0.131402  | 0.518585    | 0.33778     |
| RP1-39G22.7    | 1.86319     | 1.8681      | 1.44587    | 1.74918    | 1.08121     | 1.30456     |
| RP1-68D18.2    | -0.323873   | -0.233871   | 1.01621    | 0.786061   | 0.871134    | 0.224139    |
| RP1-68D18.4    | -0.791952   | -0.437121   | 0.625766   | 0.506155   | 0.0280033   | -0.214706   |
| RP1-78B3.1     | 2.98041     | 2.87701     | 3.17842    | 2.65937    | 1.32842     | 0.401903    |
| RP1-79C4.4     | 1.17748     | 1.13712     | -4.59508   | -5.10387   | 1.33409     | 0.719622    |
| RP1-89D4.1     | 1.96271     | 2.33642     | 1.68223    | 2.03877    | 2.96996     | 3.24907     |
| RP1-95L4.4     | -0.4048     | 0.0133408   | 0.0718862  | 0.384514   | 0.822543    | 1.10407     |
| RP11-100N21.1  | 0.783172    | 0.803078    | -0.0442914 | 0.15716    | 1.73964     | 2.13244     |
| RP11-1012A1.7  | 0.345453    | 0.686872    | -0.369766  | -0.0297    | 1.4182      | 1.22672     |
| RP11-1017G21.4 | 0.318739    | 0.278044    | -0.0240632 | 0.32307    | -0.165266   | 0.146525    |

|                 |           |            |            |           |           |             |
|-----------------|-----------|------------|------------|-----------|-----------|-------------|
| RP11-1018J11.1  | 2.21393   | 2.28877    | 2.50245    | 2.92648   | 2.64748   | 2.90732     |
| RP11-101E13.5   | 2.5727    | 2.6988     | 1.82685    | 1.98956   | 2.60628   | 1.89383     |
| RP11-1020A11.2  | 1.08887   | 0.859151   | 1.37876    | 1.56363   | 1.51964   | 1.11352     |
| RP11-1023L17.1  | 2.97627   | 3.11032    | 3.46811    | 3.07426   | 2.85071   | 2.80592     |
| RP11-1023L17.2  | 2.37484   | 2.21978    | 3.00076    | 2.484     | 2.01748   | 1.01785     |
| RP11-1024P17.1  | -0.026521 | -0.177293  | 0.488988   | 0.120113  | -0.217212 | 0.578775    |
| RP11-102M11.1   | 2.25328   | 2.28711    | 1.97562    | 2.16581   | 2.32165   | 2.46817     |
| RP11-104N10.2   | 3.70819   | 3.57744    | 4.6206     | 4.53141   | 3.58168   | 2.47321     |
| RP11-1069G10.1  | 0.769492  | 1.02308    | -0.455418  | -0.491178 | 0.951536  | -0.00614162 |
| RP11-106M3.3    | 2.11665   | 2.07103    | 2.18312    | 2.148     | 1.96445   | 1.6116      |
| RP11-1070N10.5  | 2.05583   | 2.16288    | -1.86109   | -1.40802  | -6.64581  | -5.69922    |
| RP11-107E5.3    | 3.14641   | 2.86134    | 0.308431   | 0.0811214 | 1.93963   | 1.96574     |
| RP11-1094M14.11 | 1.8708    | 1.85911    | 1.37876    | 1.71138   | 2.21315   | 1.87827     |
| RP11-1094M14.7  | 1.20429   | 1.31466    | 0.88509    | 1.35031   | 1.46231   | 1.821       |
| RP11-1099M24.6  | 1.35351   | 1.45246    | 2.68783    | 2.42411   | 2.02627   | 1.71719     |
| RP11-10K16.1    | -0.222385 | -0.195452  | 0.571444   | 0.822738  | -1.13645  | -0.31423    |
| RP11-10N23.2    | 0.0692347 | 0.166625   | 0.571444   | 0.786061  | 0.0540566 | -0.706491   |
| RP11-10O17.1    | 0.104578  | -0.525355  | 0.806728   | 0.769823  | -0.792894 | -1.47217    |
| RP11-1100L3.7   | 2.5201    | 2.73181    | 0.527531   | 1.28366   | 1.41936   | 0.426565    |
| RP11-110I1.12   | 0.0824028 | 0.357428   | 1.0357     | 0.82198   | -0.878698 | -1.70626    |
| RP11-110J1.2    | 2.76329   | 3.1417     | 2.29186    | 2.64109   | 4.03354   | 4.18827     |
| RP11-1110F20.1  | 1.67599   | 1.57061    | -1.86109   | -3.10759  | -1.23372  | -1.79933    |
| RP11-1112J20.2  | 0.969521  | 1.07008    | 0.331545   | 0.763429  | 1.05494   | 0.826437    |
| RP11-1114A5.4   | 0.031494  | -0.346758  | 0.593449   | 0.469     | 0.785132  | 0.225707    |
| RP11-111F5.2    | 0.572744  | 0.337677   | -2.33716   | -2.01929  | 0.62813   | 0.989873    |
| RP11-111F5.4    | 1.21178   | 1.22823    | -0.712341  | -0.955449 | 1.21739   | 1.19795     |
| RP11-111F5.5    | 0.0225596 | 0.366588   | -1.97744   | -1.64507  | 0.900475  | 1.2537      |
| RP11-111M22.2   | 2.46332   | 2.73929    | 2.90659    | 2.81896   | 0.871134  | 0.560157    |
| RP11-111M22.3   | 1.17133   | 1.08411    | 0.945825   | 0.82198   | 0.258664  | 0.33778     |
| RP11-112J1.1    | 4.63564   | 4.64426    | 3.84478    | 4.21244   | 5.18914   | 6.2243      |
| RP11-1148O4.1   | 0.382546  | 0.454376   | 0.432072   | 0.716894  | 0.811668  | 0.974683    |
| RP11-114F3.2    | 1.57599   | 1.55557    | 1.04958    | 1.44969   | 1.12921   | 1.57065     |
| RP11-114H7.1    | 2.30375   | 2.45532    | 1.61093    | 2.09577   | 3.15564   | 3.05823     |
| RP11-114M5.1    | 0.563754  | 0.817312   | 0.54309    | 0.285473  | 0.441802  | -0.577229   |
| RP11-1151B14.4  | -2.25047  | -3.12884   | 3.91745    | 3.96671   | 3.05835   | 2.51808     |
| RP11-115C21.2   | 0.640852  | 0.305445   | 0.355738   | 0.300663  | 0.384182  | -0.121607   |
| RP11-115J23.1   | -4.37417  | -1.46246   | -2.48229   | -1.93836  | 1.88661   | 2.50275     |
| RP11-118D22.3   | 1.21144   | 1.36909    | 0.401532   | 0.805177  | 1.02038   | 0.752791    |
| RP11-119F7.5    | 0.0152977 | 0.122235   | 0.292311   | 0.0612232 | 2.72987   | 1.30456     |
| RP11-11N9.4     | 1.77262   | 1.65093    | -3.37468   | -6.09892  | -0.250761 | 0.702755    |
| RP11-120B7.1    | -0.113985 | -0.0726466 | -0.0236246 | 0.245824  | 1.48047   | 2.19583     |
| RP11-1212A22.1  | 1.24495   | 0.868663   | 1.30996    | 1.3973    | 0.900413  | 0.206406    |
| RP11-1212A22.4  | 1.33195   | 1.38829    | 2.475      | 2.63856   | 1.04595   | 0.371581    |
| RP11-1217F2.1   | -0.244757 | -0.40643   | 1.15068    | 1.18297   | 0.391537  | 0.731574    |
| RP11-121C2.2    | 2.1713    | 2.39515    | 1.62387    | 1.45345   | 2.31412   | 2.2002      |
| RP11-1246C19.1  | 0.159022  | 0.122235   | 0.544485   | 0.28359   | 0.32848   | 0.0213376   |
| RP11-124N14.3   | 3.6804    | 3.93202    | 2.41509    | 2.91995   | 4.77313   | 5.00836     |
| RP11-1280N14.3  | 0.845309  | 0.860653   | 1.59708    | 0.907306  | 1.52123   | 0.652014    |
| RP11-128A6.3    | -0.129081 | 0.537236   | 0.324373   | 0.89124   | 0.670686  | -0.348991   |
| RP11-12G12.7    | 0.312247  | 0.804012   | 0.976408   | 1.1104    | 1.2101    | 1.27061     |
| RP11-12M9.3     | 2.32125   | 2.39381    | 1.7629     | 1.91487   | 2.87455   | 3.6539      |
| RP11-1319K7.1   | 1.11417   | 1.25575    | 2.03086    | 1.80724   | 1.04049   | 1.76917     |

|                |           |           |              |           |           |           |
|----------------|-----------|-----------|--------------|-----------|-----------|-----------|
| RP11-133N21.7  | 0.952035  | 0.840999  | 0.610974     | 0.659431  | 1.35654   | 1.03481   |
| RP11-134E15.2  | 1.80832   | 1.75664   | 1.35001      | 1.45068   | 1.79808   | 2.39808   |
| RP11-134K13.2  | 2.22543   | 2.92161   | 1.49311      | 2.78402   | 2.29628   | 3.03159   |
| RP11-134L10.1  | 1.72491   | 1.35434   | 1.23723      | 1.21568   | 0.966873  | 0.628419  |
| RP11-135F9.3   | 0.586404  | 0.548466  | 0.544485     | 0.968047  | 0.568596  | 0.769095  |
| RP11-135N5.3   | 1.06916   | 1.00482   | 2.0405       | 2.08102   | 1.81545   | 0.80115   |
| RP11-137J7.3   | 0.854012  | 0.880623  | 0.1513       | 0.381715  | 1.50546   | 1.85229   |
| RP11-137N23.1  | 1.36654   | 1.54184   | 0.957142     | 1.13319   | 1.38209   | 1.95969   |
| RP11-138A9.1   | 3.28534   | 3.05286   | 3.02593      | 3.1858    | 2.3397    | 2.15129   |
| RP11-138A9.2   | 4.13854   | 3.94123   | 4.09724      | 4.17541   | 3.38681   | 2.80505   |
| RP11-1399P15.1 | 0.207918  | 0.166625  | 0.904002     | 1.12005   | -0.10558  | -1.79933  |
| RP11-1415C14.3 | 0.19502   | -0.929951 | -0.000639256 | 0.461413  | 0.815657  | 0.853445  |
| RP11-1415C14.4 | 1.83054   | 2.02478   | 2.52699      | 2.42903   | 1.98066   | 2.07492   |
| RP11-141B14.1  | 0.301026  | 0.656176  | 1.08332      | 1.15801   | -0.450674 | -0.38461  |
| RP11-141M1.3   | 2.05249   | 1.80864   | -0.861345    | -1.20162  | -0.660096 | -1.12145  |
| RP11-142E9.1   | 3.59554   | 3.55535   | 2.46035      | 2.44193   | 2.93588   | 2.00067   |
| RP11-142L4.2   | 1.29939   | 1.67116   | 0.734022     | 1.44811   | 1.26702   | 1.94034   |
| RP11-142L4.3   | 2.88638   | 3.16242   | 2.17683      | 2.88948   | 2.94086   | 3.51885   |
| RP11-142O6.1   | 0.776727  | 0.537236  | 0.871828     | 0.724135  | 0.688494  | -0.38461  |
| RP11-144I2.1   | 1.00834   | 1.3251    | 0.73541      | 0.505972  | -0.530833 | -0.95156  |
| RP11-144L1.8   | 0.655654  | 0.670278  | 0.0257942    | 0.148388  | 1.17977   | 1.00738   |
| RP11-146N23.1  | 1.57024   | 1.70793   | 1.12497      | 1.61814   | 3.32685   | 3.64096   |
| RP11-147L13.11 | 2.77294   | 2.98295   | 4.32651      | 4.59498   | 4.70557   | 4.71246   |
| RP11-147L13.13 | 0.0298698 | 0.641842  | 1.7096       | 1.73259   | 1.75648   | 0.725785  |
| RP11-147L13.15 | -0.159773 | -0.177293 | 0.355738     | 0.736735  | 0.317072  | -0.121607 |
| RP11-148K1.12  | 0.407581  | 0.49503   | 0.101516     | 0.576861  | 0.94152   | 0.529271  |
| RP11-152C15.1  | 1.34981   | 1.42589   | 1.11933      | 1.23105   | 1.35236   | 2.10087   |
| RP11-152N13.16 | 1.11663   | 1.33703   | 0.901209     | 1.02901   | 1.29328   | 0.697783  |
| RP11-153M3.1   | 4.14325   | 4.02064   | 3.36947      | 3.65727   | 4.8483    | 4.77721   |
| RP11-154J22.1  | 1.35601   | 1.11167   | 0.525317     | 0.313478  | -0.299452 | -1.00615  |
| RP11-156E6.1   | 3.40814   | 3.4928    | 3.37298      | 3.66266   | 4.15266   | 3.6856    |
| RP11-156P1.3   | 1.39795   | 1.16097   | 1.97391      | 2.0008    | 2.15711   | 1.73617   |
| RP11-157K17.5  | 0.0692347 | 0.251507  | 0.966283     | 0.549472  | 0.0946955 | -1.31405  |
| RP11-157P1.4   | 0.849631  | 0.703827  | -0.285618    | -0.149916 | 0.804458  | 0.964835  |
| RP11-158H5.7   | 1.69844   | 1.82258   | 1.06446      | 1.35882   | -0.136604 | -0.151977 |
| RP11-158K1.3   | 1.25895   | 1.59224   | 0.714865     | 0.935792  | 1.89321   | 1.04787   |
| RP11-158L12.4  | 1.00142   | 0.746683  | 0.882627     | 0.367002  | 0.282309  | -0.247123 |
| RP11-159D12.2  | 4.64369   | 4.80094   | 2.54781      | 2.7455    | 6.08192   | 5.32355   |
| RP11-159D12.5  | 0.366521  | 0.343885  | -13.054      | -2.19718  | 1.72108   | 0.687733  |
| RP11-159D12.6  | 1.52206   | 1.05497   | 0.816993     | 0.714962  | 1.2612    | 0.669254  |
| RP11-159D12.8  | 2.77463   | 2.95712   | 2.81366      | 2.87986   | 2.87885   | 2.40704   |
| RP11-159G9.5   | 1.28965   | 1.11464   | 1.70525      | 1.67911   | 1.12765   | 1.52214   |
| RP11-159J3.1   | -1.87859  | -0.904524 | 2.05615      | 2.81484   | 3.44931   | 3.57952   |
| RP11-15A1.3    | -0.100139 | -0.673205 | -0.189953    | -0.802935 | 1.65582   | 0.659285  |
| RP11-15E18.5   | -0.159773 | 0.358453  | -0.723865    | -0.154483 | 0.652647  | 1.13883   |
| RP11-15H20.6   | 1.26097   | 1.12967   | 1.98141      | 1.74918   | 1.40582   | 0.785207  |
| RP11-160E2.6   | 2.63051   | 2.18707   | 5.19899      | 5.09065   | 4.77078   | 5.66395   |
| RP11-160O5.1   | -0.840854 | -0.734698 | 0.723445     | 1.15801   | -1.53062  | -0.121607 |
| RP11-161H23.10 | 0.337586  | 0.166625  | 0.871828     | 0.266325  | -0.302594 | -0.899103 |
| RP11-161H23.5  | 4.64021   | 4.77893   | 3.89622      | 4.28185   | 5.08712   | 5.09608   |
| RP11-161I2.1   | 0.743937  | 0.645757  | 2.50299      | 1.82784   | 1.16629   | 0.937201  |
| RP11-163E9.2   | 0.206781  | 0.0623428 | 0.203076     | 0.504386  | -0.22112  | -0.538691 |

|                |            |            |           |            |           |            |
|----------------|------------|------------|-----------|------------|-----------|------------|
| RP11-166B2.3   | 0.399051   | 0.503023   | 0.138526  | 0.632724   | 0.107996  | -0.183001  |
| RP11-166D19.1  | 4.83376    | 4.22916    | 4.6976    | 4.97219    | 4.42249   | 4.34584    |
| RP11-166P13.4  | 0.81669    | 0.896419   | -0.47862  | -0.823182  | 0.0831657 | -0.95156   |
| RP11-168J18.6  | 1.46684    | 1.75234    | 0.921132  | 1.15872    | 1.75194   | 2.12854    |
| RP11-169F17.1  | 3.78674    | 4.1792     | -5.1783   | -6.09892 ? | ?         |            |
| RP11-169K16.8  | 2.1026     | 1.79225    | 1.29451   | 1.74691    | 2.6617    | 2.69351    |
| RP11-16C1.2    | 0.684702   | 0.645757   | 1.69915   | 1.35065    | 1.49454   | 0.463298   |
| RP11-16E18.3   | 0.0152977  | 0.223769   | 0.386425  | 0.266325   | -0.10558  | -0.619042  |
| RP11-16E23.4   | 1.36145    | 1.41733    | 1.67669   | 1.54029    | 1.55932   | 1.7118     |
| RP11-16P6.1    | 1.26675    | 1.27867    | 1.46757   | 1.59857    | 1.57335   | 1.11352    |
| RP11-170M17.2  | 2.77425    | 2.71415    | 2.56536   | 2.78577    | 3.30139   | 3.78901    |
| RP11-170N16.3  | 0.00148521 | 0.305445   | 0.623914  | 0.57776    | 0.0677351 | -0.38461   |
| RP11-172F4.2   | 0.385398   | 0.34087    | 0.575361  | 0.615058   | 0.931902  | 1.50916    |
| RP11-173E2.1   | 0.323716   | 0.465504   | 0.360926  | 0.65127    | 1.40936   | 1.29654    |
| RP11-174G6.5   | -0.95653   | -0.576908  | 0.600346  | 0.571386   | 0.14325   | -0.337454  |
| RP11-175B9.2   | 0.169104   | 0.00445105 | 0.340141  | 0.0624671  | 0.121705  | -0.120912  |
| RP11-175B9.3   | 5.37412    | 5.33216    | 4.55305   | 4.85711    | 5.52175   | 6.30345    |
| RP11-175O19.4  | 1.71034    | 1.80864    | 1.88797   | 2.11036    | 3.17574   | 2.88201    |
| RP11-177G23.1  | -0.632781  | -0.253233  | 0.0260635 | -0.353769  | 0.976371  | 0.293394   |
| RP11-177H13.2  | 3.50292    | 3.63113    | 3.74087   | 3.67591    | 2.83723   | 2.36426    |
| RP11-178C3.2   | 0.0193461  | 0.171822   | 0.123481  | 0.00424969 | 0.548338  | 0.594749   |
| RP11-178H8.7   | 1.70183    | 1.70177    | 2.03357   | 2.25201    | 1.85478   | 1.92983    |
| RP11-180C16.1  | 3.09805    | 3.24869    | 2.33944   | 2.4337     | 1.7319    | 1.19959    |
| RP11-180M15.7  | 0.631914   | 0.697098   | 0.474784  | 0.57776    | 0.549226  | 1.08775    |
| RP11-181C21.4  | 2.59211    | 2.58277    | 2.55371   | 3.04045    | 3.09603   | 3.59903    |
| RP11-181E10.3  | 0.312247   | 0.223769   | 1.37111   | 1.08105    | 1.14064   | 0.247587   |
| RP11-182N22.9  | -0.379654  | -0.0848585 | 0.329629  | 0.244936   | 0.664182  | -0.247895  |
| RP11-185E8.2   | 0.847885   | 0.775632   | -3.18222  | -1.93836   | 0.134221  | 0.650921   |
| RP11-186B7.4   | 4.04633    | 4.0999     | 4.00401   | 4.6718     | 4.39018   | 4.73733    |
| RP11-186N15.3  | 0.750529   | 0.456333   | -0.558143 | -0.606037  | 0.474981  | -0.18313   |
| RP11-187C18.3  | 0.750203   | 0.952378   | -0.036844 | -0.407419  | 2.43582   | 2.69596    |
| RP11-188C12.2  | 0.694096   | 0.834307   | 1.32267   | 1.03644    | 0.244717  | 0.0920586  |
| RP11-18B3.2    | 1.28767    | 1.41848    | 1.01028   | 1.50939    | 1.45367   | 1.71313    |
| RP11-191L9.4   | 0.966312   | 1.29209    | 1.2174    | 1.25754    | -4.65668  | -5.69922   |
| RP11-192H23.7  | 1.21983    | 1.13205    | 0.498925  | 0.793446   | 1.90736   | 1.02768    |
| RP11-196G11.5  | 0.71885    | 0.794611   | 0.935482  | 0.798133   | 1.89046   | 0.443129   |
| RP11-196G18.22 | 2.53734    | 2.73191    | 3.22967   | 3.37095    | 1.74034   | 1.43288    |
| RP11-196G18.23 | 1.04244    | 1.01295    | 1.88259   | 1.72409    | 0.270529  | 1.0747     |
| RP11-196I18.3  | 0.792606   | 0.948235   | 1.06846   | 1.12508    | -1.42828  | -1.07756   |
| RP11-197N18.2  | 2.96181    | 2.84857    | 2.60677   | 2.99082    | 2.67996   | 2.65511    |
| RP11-197N18.8  | 1.9303     | 1.67674    | 1.20884   | 1.0909     | 0.282309  | -0.0627204 |
| RP11-198M15.1  | 1.52239    | 1.46851    | 1.2469    | 1.5044     | 2.93969   | 3.53048    |
| RP11-199F11.2  | 0.490837   | 0.988077   | -0.300902 | 0.154078   | 0.57806   | 0.0747657  |
| RP11-1H8.5     | 1.4671     | 1.49785    | -1.67714  | -1.32716   | -0.63036  | -0.775461  |
| RP11-203B9.4   | 1.131      | 1.21518    | 1.53089   | 1.39068    | 1.82288   | 1.23844    |
| RP11-204C16.4  | 2.23568    | 2.51445    | 2.54436   | 2.82995    | 2.3221    | 2.25081    |
| RP11-206F17.2  | 2.11779    | 2.02679    | 2.83887   | 2.96401    | 3.3121    | 3.29724    |
| RP11-206L10.2  | 0.525217   | 0.457405   | 0.602856  | 0.45133    | 0.481165  | -0.152938  |
| RP11-206L10.3  | 2.50217    | 2.41986    | 1.23462   | 1.18       | 0.894247  | 0.126629   |
| RP11-206L10.9  | 1.11426    | 1.15052    | 0.799427  | 0.869627   | 0.596086  | 0.701469   |
| RP11-209M4.1   | 0.00506937 | 0.334053   | 0.230387  | 0.370733   | -0.119778 | -0.414128  |
| RP11-20B24.4   | 2.25425    | 2.22314    | 2.06505   | 2.13742    | 2.42538   | 2.24265    |

|                |            |            |            |            |            |            |
|----------------|------------|------------|------------|------------|------------|------------|
| RP11-20I23.8   | 1.52061    | 1.40398    | 2.1357     | 2.01574    | 1.31517    | 0.382446   |
| RP11-20O24.4   | 6.45376    | 6.33471    | 5.22529    | 5.77575    | 5.66096    | 6.65537    |
| RP11-212I21.3  | 1.71045    | 1.9592     | 2.47827    | 2.54422    | 0.157716   | -1.27836   |
| RP11-212P7.1   | 1.19305    | 0.977851   | 0.986076   | 1.19969    | 2.16177    | 2.81831    |
| RP11-212P7.2   | 2.11151    | 2.13911    | 2.17844    | 2.36692    | 2.23149    | 1.30042    |
| RP11-212P7.3   | 1.2389     | 1.18256    | 0.858602   | 0.930283   | 1.58384    | 1.98279    |
| RP11-214O1.2   | ?          | -6.45019   | 1.13846    | 0.605504   | 2.46382    | 1.86317    |
| RP11-215A21.2  | 1.53104    | 1.49186    | 0.323093   | 1.01781    | 0.786697   | 1.85521    |
| RP11-216L13.19 | 0.531149   | 0.600945   | 0.791431   | 0.562142   | 0.297426   | -0.224445  |
| RP11-216M21.1  | -0.395813  | -0.655276  | -1.37581   | -1.46458   | 1.61585    | 1.61525    |
| RP11-216N14.7  | 1.21983    | 1.44408    | 1.11115    | 0.535117   | 0.362161   | -0.214706  |
| RP11-219G10.1  | -0.32867   | -0.0533395 | -0.663909  | -0.281365  | 0.265101   | 0.745874   |
| RP11-21K12.2   | 0.577131   | 0.357428   | 0.544485   | 0.520618   | -0.0308197 | -0.421131  |
| RP11-21L23.2   | 1.7188     | 1.47383    | 2.24695    | 2.04601    | -2.75246   | -2.8983    |
| RP11-220D10.1  | 0.708558   | 1.11619    | -0.0214924 | 0.663554   | 2.19769    | 2.44678    |
| RP11-223P11.3  | 0.415045   | 0.409755   | 0.56431    | 0.224151   | -0.166613  | -0.0926494 |
| RP11-226L15.5  | 0.915689   | 0.831845   | 0.340141   | 0.367002   | 0.529601   | -0.619042  |
| RP11-226M10.3  | 0.61388    | 0.736899   | 0.191626   | -0.380732  | 1.71476    | 0.68568    |
| RP11-227G15.12 | 1.89528    | 1.9434     | 1.8045     | 2.00851    | 1.54653    | 0.644327   |
| RP11-229D13.3  | 1.46083    | 1.39518    | 1.32432    | 0.989263   | 1.02625    | -0.214706  |
| RP11-229O3.1   | 0.206431   | -0.669765  | 1.95685    | 1.40748    | 1.84602    | 1.47288    |
| RP11-22B23.1   | 2.6134     | 2.52177    | 2.37896    | 2.1075     | 1.56533    | 0.609273   |
| RP11-22H5.2    | 2.45575    | 2.81561    | 0.571444   | 0.367002   | -1.57243   | -1.89883   |
| RP11-230F18.5  | 0.832372   | 0.756391   | 1.41643    | 1.4458     | 0.362161   | -0.183001  |
| RP11-231C14.4  | 1.71953    | 1.70021    | 2.31148    | 2.10273    | 1.66826    | 1.00398    |
| RP11-231I16.1  | 1.06659    | 0.999495   | 1.40711    | 1.0449     | 0.230941   | -0.400391  |
| RP11-234A1.1   | 6.36209    | 6.30197    | 5.76509    | 6.31352    | 7.45519    | 8.40832    |
| RP11-234B24.6  | 0.644142   | 1.13415    | 0.877776   | 1.78591    | 0.868165   | 0.857567   |
| RP11-234N17.1  | 1.10373    | 1.31129    | 0.50854    | 1.32801    | 1.43985    | 2.12034    |
| RP11-23J9.5    | -6.68418   | ?          | 0.69635    | 0.884348   | -0.198197  | 0.196959   |
| RP11-240G22.5  | 0.857264   | 1.00482    | 0.324373   | 0.418147   | -0.702262  | -0.752286  |
| RP11-242D8.1   | 0.649726   | 0.804012   | 1.00636    | 0.95732    | -0.320293  | -0.706491  |
| RP11-244F12.3  | 3.79726    | 3.85954    | 2.82914    | 2.98441    | 1.72406    | 1.67742    |
| RP11-244H3.4   | 1.17294    | 1.13553    | 1.09481    | 1.6095     | 1.90098    | 1.96205    |
| RP11-249L21.4  | -0.175597  | 0.168385   | -0.147405  | 0.34593    | 0.33714    | 0.929988   |
| RP11-24B13.2   | 1.43293    | 1.64614    | -1.07804   | -1.14589   | -0.144696  | -1.29623   |
| RP11-251G23.2  | -0.590352  | -0.185202  | 0.425169   | 0.958828   | 0.270529   | 0.100803   |
| RP11-251G23.5  | -0.0124477 | 0.166625   | -0.161006  | 0.248838   | -0.0308197 | 0.126299   |
| RP11-252A24.2  | 3.10171    | 3.20024    | 3.35545    | 3.32382    | 3.101      | 2.18634    |
| RP11-252I13.1  | 0.593918   | 0.721898   | 0.799319   | 1.13264    | 0.75399    | 0.250792   |
| RP11-253E3.3   | 2.49569    | 2.33807    | 0.793829   | 1.06115    | 0.416602   | 0.200291   |
| RP11-254B13.1  | 1.58835    | 1.88906    | 0.841901   | 1.37753    | 1.99477    | 2.02959    |
| RP11-255B23.1  | 1.00577    | 0.793746   | 0.8729     | 0.626187   | 1.22975    | 0.459558   |
| RP11-257O5.2   | 1.82451    | 1.88591    | 1.61093    | 1.71775    | 1.5246     | 1.0747     |
| RP11-258C19.7  | 1.85937    | 1.7171     | 1.36341    | 1.2921     | 1.10793    | 0.224139   |
| RP11-259K5.2   | 1.4468     | 1.22268    | 0.549876   | 0.799908   | 0.72188    | 0.639343   |
| RP11-259N19.1  | 0.649726   | 0.223769   | 0.355738   | 0.761609   | 1.33973    | 1.20023    |
| RP11-260M2.1   | 0.200843   | 0.458812   | 0.524545   | 0.164439   | 0.644558   | -0.0329731 |
| RP11-261C10.5  | 0.674831   | 0.650002   | 0.326721   | -0.0801947 | -0.230037  | -0.692947  |
| RP11-262H14.3  | 0.965936   | 1.25473    | -0.502869  | -0.2132    | -4.60883   | -3.82041   |
| RP11-262H14.4  | 1.30245    | 1.02201    | -0.677147  | -0.407182  | 0.796315   | 1.21704    |
| RP11-263K19.4  | 0.0578453  | 0.171053   | -0.0594904 | 0.0866072  | 1.94573    | 0.745177   |

|                |            |            |           |           |            |           |
|----------------|------------|------------|-----------|-----------|------------|-----------|
| RP11-264B17.3  | 0.326652   | -0.0814672 | 0.569442  | 0.252028  | -0.0488942 | -1.41682  |
| RP11-267M23.1  | 2.13699    | 2.1445     | 2.64304   | 2.38304   | 3.06931    | 1.62424   |
| RP11-270C12.3  | 2.84669    | 2.97805    | 2.85481   | 3.16574   | 2.54657    | 3.76278   |
| RP11-272L13.4  | -0.207073  | -0.354151  | 0.64945   | 0.476226  | 0.234612   | -0.4586   |
| RP11-274B21.14 | 2.12166    | 1.80678    | 2.47672   | 2.26703   | 2.26287    | 1.48727   |
| RP11-274B21.2  | 1.84514    | 1.41139    | 2.05919   | 1.77634   | 2.03669    | 0.574828  |
| RP11-274E7.2   | 2.62099    | 2.8812     | 2.93036   | 3.6051    | 2.4396     | 3.12058   |
| RP11-274H2.3   | -0.569597  | -0.508457  | 1.37876   | 1.41477   | 1.37315    | 0.293394  |
| RP11-274H2.5   | 0.878411   | 0.90354    | 2.70523   | 2.58467   | 2.68621    | 1.53173   |
| RP11-278C7.1   | 3.1007     | 3.22873    | 2.66358   | 2.88617   | 3.13855    | 3.33224   |
| RP11-278C7.5   | 0.476879   | 0.894007   | 0.0567222 | 0.236903  | -0.552789  | -2.60521  |
| RP11-27I1.4    | 0.824548   | 0.813344   | 0.662041  | 0.82198   | 1.45867    | 1.2122    |
| RP11-281O15.7  | -0.123819  | 0.27422    | -1.10134  | -0.323834 | 0.802632   | 0.284775  |
| RP11-282K24.3  | 2.57938    | 2.72451    | 3.27181   | 2.98129   | -2.572 ?   |           |
| RP11-282O18.3  | 2.70465    | 2.59226    | 0.832128  | 1.03337   | 2.1463     | 0.92998   |
| RP11-283I3.6   | 1.8934     | 1.90787    | 1.16526   | 1.32585   | 1.8195     | 1.18815   |
| RP11-284F21.10 | 0.367103   | 0.357428   | 1.86635   | 1.63267   | 1.83555    | 1.42261   |
| RP11-284F21.9  | -1.74441   | -1.25306   | 1.55122   | 1.27492   | 0.606556   | 0.126299  |
| RP11-286H14.4  | 2.88128    | 2.66299    | 2.1418    | 2.56607   | 3.90275    | 3.60874   |
| RP11-286N22.8  | 2.23497    | 2.0519     | 1.95862   | 2.2552    | 2.14378    | 2.53398   |
| RP11-288C17.1  | 2.29896    | 2.33246    | -0.455418 | 0.178848  | 0.428357   | 1.03481   |
| RP11-288C18.1  | 1.82451    | 1.90787    | 1.26773   | 1.10068   | 1.68845    | 1.43288   |
| RP11-288E14.2  | 1.45744    | 1.51996    | 1.00161   | 1.19758   | 1.57604    | 1.84385   |
| RP11-288G3.4   | -0.223192  | 0.123017   | 0.82777   | 1.28354   | 0.597155   | 0.560157  |
| RP11-288H12.3  | 1.36579    | 1.045      | 1.93544   | 1.99448   | 2.22235    | 1.35942   |
| RP11-288K12.1  | 1.31777    | 1.15192    | 1.48894   | 1.13916   | 0.606556   | -0.280287 |
| RP11-289H16.1  | 1.59189    | 1.37787    | 0.676042  | 0.374889  | -0.557075  | -0.762747 |
| RP11-289I10.2  | 1.53819    | 1.60056    | 1.79153   | 2.26738   | 2.10382    | 2.13339   |
| RP11-290L1.4   | -0.0745444 | 0.0290358  | 0.332255  | 0.0121252 | 0.257011   | -0.398979 |
| RP11-294J22.7  | 1.55834    | 1.66131    | 1.71737   | 1.38307   | 1.20393    | 0.100762  |
| RP11-295G20.2  | 1.74803    | 1.5651     | -1.01332  | -0.823182 | 0.706084   | 0.668401  |
| RP11-295H24.3  | 1.85778    | 2.05521    | 1.0059    | 1.3287    | 2.065      | 2.05655   |
| RP11-295P9.3   | 4.40096    | 4.44268    | 2.91696   | 2.7243    | 3.39767    | 2.95268   |
| RP11-295P9.8   | 1.77694    | 2.12513    | -1.57375  | -1.66686  | -1.33939   | -2.08409  |
| RP11-296E7.1   | 3.81117    | 3.73405    | 3.15552   | 3.43801   | 3.75729    | 3.55667   |
| RP11-296P7.4   | 1.21781    | 1.48583    | 1.26018   | 1.88555   | 1.85542    | 1.64205   |
| RP11-297L17.6  | 3.23073    | 3.41888    | 2.67682   | 3.07359   | 3.31388    | 3.51576   |
| RP11-298C3.2   | 4.66107    | 4.48296    | 3.7929    | 3.88669   | 3.80681    | 3.92407   |
| RP11-298J20.4  | 0.687473   | 0.371213   | -0.184974 | 0.84835   | 0.644253   | 0.711178  |
| RP11-299J3.8   | 1.75494    | 2.01142    | 2.16718   | 2.37052   | 2.28883    | 2.26831   |
| RP11-29G8.3    | 2.44834    | 2.44692    | 1.87698   | 1.8029    | 1.6499     | 1.03157   |
| RP11-2B6.2     | 2.06891    | 2.05644    | 2.26169   | 1.62741   | 1.90345    | 1.87852   |
| RP11-2C24.3    | 0.278223   | -5.05E-05  | 0.690024  | 0.438122  | -0.224953  | -0.308287 |
| RP11-2C24.9    | 2.9104     | 3.03429    | 3.184     | 3.39241   | 3.09296    | 2.29016   |
| RP11-301G21.1  | 0.480172   | 0.54587    | -0.183372 | 0.476226  | 1.04134    | 1.35093   |
| RP11-303E16.2  | 1.63187    | 1.9252     | 1.5647    | 2.20407   | 1.46901    | 1.96574   |
| RP11-303E16.9  | 0.307778   | 0.395162   | 0.831123  | 0.47282   | -0.853519  | -2.23652  |
| RP11-304F15.5  | 1.17868    | 1.24589    | 0.821359  | 1.17087   | 1.90661    | 2.03478   |
| RP11-305B6.1   | 0.991993   | 1.43766    | 1.18467   | 1.78428   | 1.47987    | 1.38698   |
| RP11-305M3.2   | 0.644604   | 0.758098   | 0.441367  | 0.739131  | 1.14881    | 1.65939   |
| RP11-305O6.3   | 1.30659    | 1.7708     | -0.183372 | -0.177939 | 0.234612   | -0.662104 |
| RP11-307L3.2   | 1.29751    | 1.41474    | 1.57086   | 1.99549   | 2.24687    | 2.88751   |

|                |            |             |            |            |            |           |
|----------------|------------|-------------|------------|------------|------------|-----------|
| RP11-307P22.1  | 2.0148     | 2.11323     | 1.22403    | 1.55834    | 2.31603    | 3.2132    |
| RP11-308D16.2  | -0.289526  | -0.105152   | 0.747284   | 0.659431   | -0.802092  | -0.752286 |
| RP11-30L15.4   | 0.743937   | 0.581631    | 0.945825   | 0.736735   | -0.217212  | -0.497071 |
| RP11-30P6.1    | 0.688485   | 0.872033    | 1.16038    | 1.56009    | 1.92697    | 1.49039   |
| RP11-312J18.5  | 4.21966    | 4.92031     | 3.51163    | 4.60076    | 4.16833    | 5.24658   |
| RP11-313J2.1   | 4.71073    | 4.75761     | 0.242852   | -0.158637  | -5.06184   | -5.66393  |
| RP11-314A20.1  | 1.02845    | 0.812794    | 0.236009   | 0.572123   | 1.72393    | 2.95795   |
| RP11-314B1.2   | ?          | -4.13839    | 3.78081    | 3.73352    | -3.6585    | -3.38329  |
| RP11-317N8.4   | 0.104914   | 0.305492    | 0.302723   | 0.282155   | 0.240791   | 0.0634339 |
| RP11-320A16.1  | 0.961786   | 1.13699     | 0.886995   | 1.37338    | 1.59366    | 2.3843    |
| RP11-321A17.3  | 1.35667    | 1.25884     | 0.208904   | 0.82198    | 1.78711    | 2.05486   |
| RP11-321N4.5   | 0.556199   | 0.575932    | -0.798642  | -0.849703  | 0.123044   | 0.0372557 |
| RP11-323I15.2  | -0.0550876 | -0.139207   | 0.163846   | 0.555384   | -0.0816932 | 0.0213376 |
| RP11-325E14.5  | 0.146525   | 0.370644    | 0.723934   | 0.999755   | 0.384182   | 0.33778   |
| RP11-325K4.2   | -1.00311   | -1.38768    | 0.515561   | 0.871102   | 0.182336   | 0.225497  |
| RP11-325P15.1  | 0.561702   | 0.550792    | -0.348888  | -0.257999  | 0.467165   | 0.324223  |
| RP11-325P15.2  | 0.465421   | 1.00213     | -0.0833124 | 0.216871   | 0.484128   | 0.967309  |
| RP11-326A19.5  | 1.48595    | 1.40967     | 1.8361     | 2.33915    | 3.02968    | 3.32503   |
| RP11-326I11.3  | 0.701877   | 0.265185    | 1.14744    | 1.33416    | 0.159978   | 0.270672  |
| RP11-328C8.2   | 0.351413   | 0.417369    | 0.717684   | 0.853597   | 1.02613    | 0.508662  |
| RP11-328C8.4   | -1.36396   | -1.89035    | -1.44651   | -2.24735   | 1.89854    | 1.55973   |
| RP11-328J2.1   | 2.52734    | 2.52585 ?   | ?          | ?          | -6.64581   | -4.70296  |
| RP11-329A14.1  | 2.91203    | 2.63238     | 1.46804    | 1.60928    | 2.75506    | 3.11985   |
| RP11-32B5.1    | 2.16715    | 2.20712     | 1.53762    | 1.8862     | 3.0825     | 2.72008   |
| RP11-32B5.7    | -0.224794  | 0.0562506 ? | ?          | ?          | 0.7149     | 0.0437225 |
| RP11-331F4.5   | 1.61437    | 1.47863     | 2.46564    | 2.30151    | 1.01401    | 0.425116  |
| RP11-332H14.2  | 2.41557    | 2.48554     | 2.45819    | 2.45994    | 1.988      | 1.50278   |
| RP11-332M2.1   | 0.735617   | 0.581631    | 0.340141   | 0.445854   | 1.08121    | 0.50283   |
| RP11-332P22.2  | -0.525621  | -0.373963   | -0.686345  | -0.0403337 | 1.44504    | 0.836183  |
| RP11-333E13.2  | 2.22724    | 1.99854     | 2.44836    | 2.44384    | 2.83703    | 2.80278   |
| RP11-333E13.4  | -0.697001  | -1.17487    | 0.21004    | 0.736735   | 0.041271   | 0.225559  |
| RP11-334A14.2  | 1.60372    | 1.59597     | 1.94518    | 2.48315    | 2.96212    | 3.25753   |
| RP11-334C17.5  | 1.39176    | 1.37811     | 2.0526     | 1.99795    | 0.69315    | 0.0747657 |
| RP11-334E6.12  | -4.41728   | -6.80804    | 3.83892    | 4.06172    | 2.83983    | 2.70122   |
| RP11-334L9.1   | 2.39582    | 2.42817     | 1.96469    | 2.38681    | 2.02109    | 1.24528   |
| RP11-335F8.2   | 0.623342   | 0.86105     | 0.571444   | 0.968047   | 1.31761    | 1.11399   |
| RP11-336K24.12 | 0.71885    | 0.559609    | 0.308431   | 0.89124    | -0.705893  | -1.12145  |
| RP11-337C18.4  | -2.52469   | -2.6546     | 1.21851    | 2.05663    | -2.48959   | -2.53171  |
| RP11-337C18.8  | 1.13083    | 0.733259    | 1.01326    | 0.906852   | 0.832404   | 0.807256  |
| RP11-338I21.1  | 0.0289651  | -0.0525343  | 0.474784   | 0.857026   | -0.285108  | -0.247123 |
| RP11-33B1.1    | 2.28672    | 2.23417     | 4.96718    | 4.11353    | 1.91192    | 1.68771   |
| RP11-340I6.6   | 1.75646    | 1.61476     | 1.81935    | 2.02799    | 2.12498    | 2.41416   |
| RP11-341D18.7  | 2.8223     | 2.45884     | 2.35394    | 2.43217    | 2.74951    | 1.88363   |
| RP11-342D11.2  | 0.00723857 | 0.344226    | -0.485564  | -0.28505   | 1.14509    | 0.682879  |
| RP11-342K2.1   | 2.30656    | 2.23761     | 3.01615    | 2.72407    | 2.71474    | 1.12623   |
| RP11-342K6.1   | 2.3535     | 2.37006     | 1.7995     | 1.8512     | 2.47413    | 2.46322   |
| RP11-343C2.11  | 2.62137    | 2.46413     | 2.12491    | 2.35051    | 2.73904    | 3.46121   |
| RP11-343C2.12  | 2.79977    | 3.00088     | 2.4438     | 2.77525    | 4.14621    | 4.28957   |
| RP11-343H5.4   | 1.04729    | 1.17199     | 2.73467    | 3.19086    | 3.76088    | 4.73683   |
| RP11-343L5.2   | 0.863225   | 0.822624    | 1.68687    | 1.65276    | 1.01923    | 0.560157  |
| RP11-345J4.5   | 3.41381    | 3.60879     | 3.0684     | 3.62846    | 3.55089    | 4.37948   |
| RP11-345K9.3   | -0.697041  | -0.790185   | -0.115249  | 0.140752   | 0.493873   | 0.488032  |

|                |            |           |            |           |            |           |
|----------------|------------|-----------|------------|-----------|------------|-----------|
| RP11-345P4.9   | -0.0124477 | -0.39658  | -0.117291  | 0.0612232 | 1.1812     | 0.53826   |
| RP11-347C12.1  | 1.92862    | 1.55566   | 2.49656    | 2.47776   | 2.21481    | 0.206956  |
| RP11-347E10.1  | 0.832372   | 1.18106 ? | ?          |           | -0.637731  | -0.662104 |
| RP11-347H15.2  | 0.0735324  | 0.589648  | -0.487874  | -0.288505 | 1.06793    | 1.29901   |
| RP11-347I19.7  | 1.42176    | 1.50623   | 1.66896    | 1.618     | 0.929071   | 0.602675  |
| RP11-347P5.1   | -0.432112  | -0.734698 | 0.893354   | 0.935626  | 0.210164   | -0.848487 |
| RP11-348P10.2  | 1.21386    | 1.29209   | -0.825729  | -0.786664 | 1.2101     | 0.597145  |
| RP11-34P1.2    | 2.26288    | 2.38858   | 2.64388    | 2.91243   | 3.42191    | 3.99394   |
| RP11-34P13.13  | 1.61955    | 1.51281   | 0.452448   | 0.590865  | -0.436028  | -1.46015  |
| RP11-350G24.2  | 1.2776     | 1.87823   | 0.764966   | 1.33009   | 1.32953    | 1.20814   |
| RP11-350J20.5  | -0.373266  | -0.135952 | 0.422427   | 0.766909  | 0.193229   | -0.147122 |
| RP11-351I24.3  | -0.487563  | -0.488532 | -0.017899  | 0.509858  | -0.828955  | 0.735843  |
| RP11-352M15.2  | 2.85552    | 2.91002   | 2.5512     | 2.54582   | 2.21007    | 2.00755   |
| RP11-355B11.2  | 1.85324    | 2.05873   | 1.52591    | 1.7894    | 1.963      | 2.12305   |
| RP11-355O1.11  | 0.520176   | 0.697098  | 0.723445   | 0.549472  | -0.0454657 | -0.577229 |
| RP11-356J5.12  | -1.41331   | -0.93902  | -0.350462  | 0.176693  | -0.0903144 | 1.3157    |
| RP11-357N13.6  | 1.62288    | 1.38894   | 2.54781    | 2.53864   | 1.96907    | 1.27061   |
| RP11-359B12.2  | 0.912435   | 0.892546  | 2.05182    | 2.09953   | -0.135126  | -0.150979 |
| RP11-359E3.4   | 1.10833    | 1.16656   | 0.935482   | 0.89124   | 0.568596   | -0.151977 |
| RP11-35G9.3    | 1.07964    | 1.4166    | -1.13466   | -0.822638 | -0.837001  | -0.22179  |
| RP11-362K14.5  | 1.30536    | 1.57951   | 2.16778    | 1.96625   | 1.86798    | 1.13315   |
| RP11-363N22.3  | 0.733328   | 0.678757  | 0.615529   | 0.48943   | 0.188287   | -0.747824 |
| RP11-365D23.4  | 1.16702    | 1.28956   | 1.41542    | 1.77394   | 1.32987    | 1.77175   |
| RP11-365H23.1  | 4.2117     | 4.23441   | 1.30837    | 1.89682   | 1.61585    | 2.02953   |
| RP11-366L20.2  | 5.77317    | 5.60075   | 2.32398    | 2.34279   | 2.8365     | 2.49298   |
| RP11-367E12.4  | 0.903995   | 1.03816   | 0.166381   | 0.660427  | 0.889536   | 0.974522  |
| RP11-367G18.2  | 1.74049    | 1.89796   | 0.846931   | 1.50946   | 2.11391    | 2.83189   |
| RP11-36C20.1   | 4.40088    | 4.49764   | 4.21156    | 4.76301   | 5.08994    | 5.61224   |
| RP11-372E1.1   | 2.40379    | 2.67739   | 2.35998    | 2.7942    | 3.48854    | 3.49488   |
| RP11-378G13.2  | 0.0243481  | 0.263611  | 1.09624    | 1.66826   | 2.19261    | 2.22743   |
| RP11-378J18.8  | 1.22542    | 1.14987   | 1.56431    | 1.57745   | 1.18427    | 1.29068   |
| RP11-379B18.5  | -0.0695851 | 0.375701  | 1.75213    | 1.87767   | -2.572     | -4.11926  |
| RP11-379F4.4   | 0.4521     | 0.766044  | 1.69336    | 1.42259   | 0.427241   | 0.176042  |
| RP11-379H18.1  | 3.15579    | 2.92302   | 2.70218    | 2.63265   | 2.74697    | 2.22994   |
| RP11-37B2.1    | 3.77564    | 3.54418   | 3.37298    | 3.09085   | 2.99969    | 2.58792   |
| RP11-37C7.3    | 0.493914   | 0.414146  | -0.0336419 | 0.300663  | -0.381696  | -0.799586 |
| RP11-37J13.1   | 0.219054   | 0.653381  | 0.0638618  | 0.341257  | 0.683355   | 0.687948  |
| RP11-380B4.3   | 0.847885   | 0.666511  | 1.78805    | 1.2041    | 0.469063   | -0.752286 |
| RP11-380G5.3   | 0.567857   | 0.107125  | 0.662041   | 0.476226  | 1.06767    | 0.719622  |
| RP11-381O7.3   | 1.25993    | 0.579692  | -1.70851   | -1.33321  | 1.17645    | 0.64596   |
| RP11-384B12.2  | 0.770753   | 1.02387   | 0.571444   | 0.606433  | 1.10793    | 0.968076  |
| RP11-384B12.3  | 1.63634    | 1.95207   | 1.38097    | 1.76772   | 2.40345    | 2.46372   |
| RP11-384K6.6   | -1.49529   | -1.38609  | 1.93928    | 2.0329    | 0.642092   | -0.553748 |
| RP11-386G11.10 | 3.56842    | 3.28623   | 3.20068    | 3.78039   | 4.95906    | 2.94351   |
| RP11-386G11.5  | 0.440676   | 0.5903    | -0.0986878 | -0.322487 | -0.229832  | -0.416348 |
| RP11-386I14.3  | 0.593526   | 0.874301  | 1.00203    | 1.41093   | 1.19705    | 1.01451   |
| RP11-386J22.3  | 0.595618   | 0.318612  | 0.225978   | -0.301307 | -0.0602604 | -0.899103 |
| RP11-386M24.4  | 2.59889    | 2.51323   | 2.08486    | 2.4909    | 2.34432    | 2.50602   |
| RP11-390E23.6  | 1.44562    | 1.42594   | 0.914572   | 1.07114   | 0.83161    | 0.578775  |
| RP11-390K5.1   | 0.940933   | 0.826884  | 0.924678   | 1.29157   | 1.51046    | 1.85764   |
| RP11-390P2.2   | 1.08887    | 1.31199   | 0.191626   | 0.578475  | 1.18935    | 0.769095  |
| RP11-390P2.4   | 1.69327    | 1.52019   | -0.659745  | -0.938639 | 0.815493   | 0.224139  |



|                |            |            |           |            |            |           |
|----------------|------------|------------|-----------|------------|------------|-----------|
| RP11-391L3.3   | 0.440559   | 0.370142   | 1.11115   | 0.810106   | -0.802092  | -1.24695  |
| RP11-392O17.2  | -0.175369  | 0.013012   | 1.02599   | 0.968047   | -0.320293  | -1.4584   |
| RP11-392O18.2  | 0.503145   | 0.592522   | 0.138526  | 0.125175   | 0.688494   | 0.443129  |
| RP11-392P7.1   | -0.813933  | -0.400153  | -0.803249 | -0.30984   | 0.938858   | 1.26406   |
| RP11-393I2.2   | 0.301026   | 0.305445   | 0.747284  | 0.139221   | 0.839605   | 0.33778   |
| RP11-393N4.2   | 0.901355   | 1.23813    | 0.794304  | 1.44625    | 2.3059     | 2.13075   |
| RP11-394B2.1   | 0.52697    | -0.805267  | 2.26295   | 1.82688    | 2.03058    | 1.93754   |
| RP11-394B2.5   | -0.306598  | -0.140771  | 0.324373  | 0.430424   | 0.258664   | 0.422664  |
| RP11-395G23.3  | 1.91933    | 2.41369    | -0.428455 | 0.350701   | 0.749157   | 1.13883   |
| RP11-395L14.17 | 2.20891    | 2.27806    | 2.13635   | 2.19299    | 2.44153    | 2.5744    |
| RP11-397E7.4   | 0.291391   | 0.201521   | -0.241062 | 0.651353   | 0.473641   | 0.803384  |
| RP11-397P13.7  | -0.0547804 | 0.292146   | -0.300715 | 0.139221   | 1.00508    | 1.20023   |
| RP11-398K22.12 | 2.52248    | 2.47915    | 0.350791  | -0.557896  | 2.25649    | 1.63638   |
| RP11-39C10.1   | 1.66476    | 1.61265    | 1.30099   | 1.63725    | 1.64424    | 1.34295   |
| RP11-3D23.1    | 1.59888    | 1.69894    | 0.725235  | 1.30079    | 1.94369    | 1.70881   |
| RP11-3J10.7    | 0.772426   | 0.843349   | 0.952975  | 1.0599     | 1.82089    | 1.81405   |
| RP11-400F19.18 | 0.194844   | 0.137189   | 1.12031   | 1.02009    | 0.509706   | -0.619042 |
| RP11-400F19.6  | 1.71339    | 1.51337    | 1.90539   | 2.0714     | 2.4318     | 2.75846   |
| RP11-400K9.4   | 0.80878    | 0.831845   | 1.68687   | 2.27921    | -2.01588   | -1.80567  |
| RP11-401L13.4  | 2.62971    | 2.8895     | 2.14219   | 2.73548    | 3.13262    | 3.00102   |
| RP11-403B2.7   | -0.082776  | 0.111552 ? | ?         |            | 0.90952    | 0.31956   |
| RP11-403I13.8  | 3.16014    | 3.00673    | 2.87395   | 2.78025    | -1.49605   | -2.20819  |
| RP11-403P17.6  | 0.0199581  | 0.0853567  | 0.179664  | 0.332427   | 0.559433   | 0.799004  |
| RP11-404J23.1  | -2.69815   | -3.46127 ? | ?         |            | 1.84354    | 2.15129   |
| RP11-405A12.1  | 1.50287    | 1.62548    | 1.17015   | 1.6932     | 2.80787    | 2.73056   |
| RP11-408P14.1  | 6.02619    | 5.86893    | 5.00528   | 5.35724    | 5.99089    | 6.4333    |
| RP11-409C19.2  | 1.20554    | 1.55533    | 0.588603  | 1.11421    | 1.52005    | 0.978232  |
| RP11-415J8.3   | 2.13734    | 1.88047    | 2.23035   | 2.07787    | 1.3528     | 0.600631  |
| RP11-417F21.1  | 0.480917   | 0.503023   | 0.102     | -0.0642959 | 0.351018   | -0.421131 |
| RP11-417L14.1  | 1.67735    | 1.85476    | 1.42238   | 2.08238    | 2.50273    | 2.06427   |
| RP11-418J17.1  | 0.368265   | 0.184547   | 1.88534   | 1.77913    | 3.57531    | 3.40961   |
| RP11-41O4.2    | 1.77262    | 1.2583     | -2.37543  | -2.40763   | -1.80184   | -2.70579  |
| RP11-421E14.2  | 1.77668    | 1.87257    | 1.85542   | 1.48367    | 1.33409    | 0.615294  |
| RP11-421F16.3  | 2.28666    | 2.61665    | 2.01617   | 2.22211    | 1.88661    | 2.06149   |
| RP11-421L21.3  | 0.592043   | 0.680702   | 1.64306   | 1.72802    | 0.746072   | 1.09779   |
| RP11-421N8.1   | 3.26422    | 3.2775     | 3.0879    | 3.4867     | 3.68533    | 4.2784    |
| RP11-422P24.11 | 0.987481   | 0.6247     | -0.229171 | -0.154483  | 0.0402612  | -0.619042 |
| RP11-423E7.2   | 0.529821   | 0.419895   | 1.6494    | 1.68562    | 0.458718   | -0.348991 |
| RP11-423F24.3  | 1.07005    | 1.2583     | 0.933097  | 1.27044    | 1.85784    | 1.71776   |
| RP11-423H2.1   | 3.9571     | 3.86089    | 3.27577   | 3.80075    | 4.8839     | 5.11088   |
| RP11-423P10.2  | 2.73542    | 2.7123     | 2.18874   | 1.96302    | 2.3529     | 2.12145   |
| RP11-424C20.2  | 3.69081    | 4.20537    | 2.58373   | 3.20963    | 2.94361    | 3.354     |
| RP11-425L10.1  | 6.62275    | 6.47046    | 6.11862   | 6.54127    | 7.41558    | 8.48492   |
| RP11-426C22.4  | 1.39683    | 1.46419    | 0.217243  | 0.843091   | -6.64581 ? |           |
| RP11-426D19.1  | 1.20786    | 1.12217    | 0.686917  | 0.120113   | 2.15028    | 0.752791  |
| RP11-426J5.3   | 1.05586    | 1.12217    | 1.12031   | 0.857026   | -1.26766   | -1.61882  |
| RP11-427L15.2  | -0.611409  | -0.253233  | 0.597917  | 0.520618   | 0.448309   | -0.348991 |
| RP11-428P16.2  | 0.934939   | 0.639288   | 0.386193  | -0.103217  | -0.635033  | -0.707508 |
| RP11-429P3.8   | -0.289526  | -0.158917  | 0.53081   | 0.57776    | 0.670686   | 0.315752  |
| RP11-431J24.2  | 2.06111    | 1.95063    | -3.85951  | -4.08532   | -5.65305 ? |           |
| RP11-435F17.3  | -0.0940992 | 0.152832   | 1.07423   | 1.09968    | 1.4578     | 1.35261   |
| RP11-436H11.1  | 0.183582   | -0.0665709 | 0.0432885 | 0.479944   | 1.54132    | 1.20646   |

|                |             |            |           |              |            |            |
|----------------|-------------|------------|-----------|--------------|------------|------------|
| RP11-437B10.1  | 3.26883     | 3.24556    | 3.47061   | 3.35287      | 3.75387    | 3.4303     |
| RP11-438B23.2  | -2.45038    | -2.37465 ? | ?         |              | 1.06084    | 1.1637     |
| RP11-438J1.1   | 1.24721     | 1.39654    | 0.408842  | 1.24196      | 2.06858    | 1.19613    |
| RP11-438L7.3   | 2.39307     | 2.52162    | 1.89507   | 2.41658      | 2.00795    | 1.9956     |
| RP11-439E19.10 | 1.85554     | 1.51447    | -0.401986 | -0.649181    | -0.184426  | -0.662104  |
| RP11-43F13.1   | 1.55057     | 1.26572    | -2.08749  | -1.24133     | 0.865776   | 1.01203    |
| RP11-43N16.4   | 0.049101    | -0.0978662 | 0.125651  | 0.789562     | 0.807792   | 0.0927757  |
| RP11-440D17.3  | ? ?         |            | -1.01332  | -0.616766    | 0.971023   | 1.14298    |
| RP11-440L14.1  | 1.07578     | 1.10769    | 1.30838   | 1.39906      | 0.653152   | -0.348934  |
| RP11-441O15.3  | 0.171399    | -0.292758  | 0.503064  | 0.28359      | -0.200727  | -0.662104  |
| RP11-442H21.2  | 4.54672     | 4.62764    | 3.49429   | 3.64202      | 5.16852    | 4.23924    |
| RP11-443B20.1  | 1.46455     | 1.50774    | 0.636738  | 1.12005      | 0.474036   | -0.151977  |
| RP11-443P15.2  | -1.27248    | -0.508457  | 4.6011    | 4.89819      | 1.37315    | 1.1007     |
| RP11-444D3.1   | 1.66727     | 1.20254    | 0.893354  | 0.383121     | 1.49454    | 0.847941   |
| RP11-444J21.2  | -0.239491   | -0.105152  | -0.538101 | -0.000171691 | 1.67113    | 1.56011    |
| RP11-446E9.1   | 4.54019     | 4.69568    | 3.65543   | 4.2265       | 4.3668     | 5.46167    |
| RP11-447D11.3  | 1.27825     | 1.28539    | 0.308431  | 0.334214     | 0.947083   | 0.90806    |
| RP11-448A19.1  | 3.31634     | 3.24624    | 2.99639   | 3.00752      | 3.3565     | 2.57407    |
| RP11-448G15.3  | 0.586404    | 0.635262   | 0.460428  | 0.646135     | 0.766027   | 0.560157   |
| RP11-449H3.3   | 3.24789     | 3.00817    | 3.15287   | 3.53777      | 3.17848    | 3.72072    |
| RP11-449J21.3  | 0.999603    | 0.930556   | 1.4447    | 1.34516      | 1.23165    | 0.66164    |
| RP11-449L13.2  | -0.0194058  | -0.485378  | 2.47094   | 3.52817      | -0.852709  | -0.662104  |
| RP11-449P15.2  | 1.13628     | 1.31416    | 2.54367   | 2.33358      | 0.407527   | -0.0293981 |
| RP11-44F14.6   | -0.341358   | -0.122851  | 0.723445  | 0.367002     | 0.210164   | -0.151977  |
| RP11-451F14.1  | 0.367103    | 0.107125   | 1.11115   | 1.08105      | 0.107996   | -0.31423   |
| RP11-452F19.3  | 1.01523     | 0.850103   | 0.308431  | 0.724135     | 2.27338    | 2.50762    |
| RP11-452L6.5   | 2.37507     | 2.3592     | 2.53704   | 2.76985      | 1.61998    | 1.8437     |
| RP11-452N17.1  | 4.23444     | 4.2236     | 3.7634    | 4.21111      | 4.48188    | 5.61662    |
| RP11-454F8.2   | 0.183671    | 0.444137   | 0.610974  | 0.0612232    | 1.22238    | 0.993783   |
| RP11-456J20.1  | 1.41332     | 1.65305    | 1.06297   | 1.69931      | 1.60616    | 1.99214    |
| RP11-458D21.5  | 3.41799     | 3.39199    | 2.60537   | 2.59632      | 1.77034    | 1.27898    |
| RP11-458J1.1   | -0.00900304 | 0.040177   | 0.884879  | 0.900838     | -0.0324241 | -0.662104  |
| RP11-45A17.4   | -0.632781   | -1.105     | 0.474784  | -0.275776    | 1.90957    | 0.126299   |
| RP11-45M22.2   | 2.29246     | 2.83866    | 3.02593   | 3.04852      | 2.1079     | 1.27061    |
| RP11-45M22.3   | 0.00148521  | 0.107125   | 0.793829  | 0.139221     | -0.594016  | -1.12145   |
| RP11-460B17.1  | -6.68418    | -3.65369   | -3.85951  | -3.52222     | 1.44825    | 1.88577    |
| RP11-460N11.2  | 4.8662      | 4.78146    | -2.27595  | -2.62533     | 0.664974   | 1.19764    |
| RP11-461A8.4   | 0.178339    | 0.19415    | 0.178198  | -0.131011    | 2.37458    | 2.28105    |
| RP11-463O12.5  | 4.59608     | 4.63784    | 3.75479   | 3.63123      | 4.06212    | 3.11451    |
| RP11-464D20.2  | 1.47911     | 1.50199    | 1.46966   | 1.77467      | 2.2136     | 3.3004     |
| RP11-464F9.1   | 0.177369    | 0.141995   | 0.664064  | 0.797918     | 1.38794    | 0.814657   |
| RP11-466F5.8   | 1.41335     | 1.55739    | -0.166577 | -0.0304306   | -0.648048  | -0.505505  |
| RP11-466H18.1  | 6.58274     | 6.51338    | 5.92436   | 6.33506      | 7.61215    | 8.36243    |
| RP11-467L13.7  | 1.00834     | 0.822624   | 0.558032  | 0.158078     | 0.282309   | -0.0918635 |
| RP11-468E2.1   | 3.78145     | 3.78819    | 2.85326   | 3.22094      | 3.99248    | 4.06025    |
| RP11-468E2.4   | 0.565968    | 0.579228   | 1.30347   | 0.920812     | 1.85871    | 1.10544    |
| RP11-468O2.1   | 1.59304     | 1.59918    | 1.29295   | 1.81868      | 1.45544    | 1.17685    |
| RP11-46C24.7   | 0.45076     | 0.265185   | 0.503064  | 0.549472     | -0.356358  | -0.899103  |
| RP11-46D6.1    | -0.972229   | -1.47269   | 1.32663   | 0.981568     | -0.202441  | -0.694933  |
| RP11-473I1.9   | 0.0778582   | -0.0303378 | 1.50422   | 0.879196     | -0.0389768 | -0.0875065 |
| RP11-473M20.16 | 0.792847    | 0.635262   | 0.64945   | 1.01017      | 0.909612   | 1.44307    |
| RP11-473N11.2  | 3.85249     | 4.17125    | 3.12304   | 3.59839      | 3.83066    | 3.67691    |

|                 |           |             |           |            |            |            |
|-----------------|-----------|-------------|-----------|------------|------------|------------|
| RP11-474L11.5   | 0.41996   | 0.581631    | -0.229171 | -0.301307  | 0.222446   | -0.662104  |
| RP11-474P2.6    | 0.676033  | 0.804012    | 3.88525   | 3.77686    | 0.871134   | 0.878317   |
| RP11-474P2.7    | -0.255978 | 0.0450795   | 2.95603   | 2.69531    | -0.23389   | -0.619042  |
| RP11-475C16.1   | 6.36839   | 6.28856     | 6.00623   | 6.33154    | 6.79671    | 7.44167    |
| RP11-477D19.2   | 2.31176   | 2.24927     | 1.76096   | 1.7082     | 1.94683    | 1.31999    |
| RP11-478B9.3    | 0.825997  | 1.24486     | 0.371838  | 0.880858   | 0.258664   | 0.100762   |
| RP11-478C6.4    | 1.37793   | 1.48642     | 0.596248  | 1.22918    | 2.01934    | 2.43449    |
| RP11-479G22.8   | 1.85554   | 1.96763     | -0.659745 | -0.616766  | 1.39501    | 1.18815    |
| RP11-47I22.2    | 0.593382  | -0.177293   | -0.183372 | -0.275776  | 1.87915    | 1.27788    |
| RP11-480A16.1   | 0.990853  | 0.830166    | 2.37466   | 2.20507    | 2.4499     | 1.88847    |
| RP11-480C16.1   | -0.676496 | -0.418273   | -0.350462 | 0.535117   | 1.08794    | 0.80115    |
| RP11-481C4.2    | 2.47336   | 2.5456      | 2.66823   | 2.5169     | 2.14061    | 1.40185    |
| RP11-481J2.4    | 0.340858  | 0.0368339   | 0.351481  | 0.41512    | 0.837007   | -0.169621  |
| RP11-486G15.1   | 0.470938  | 0.331671    | 0.636738  | 0.619178   | -0.10558   | -0.38461   |
| RP11-486O12.2   | 1.40468   | 1.33154     | 1.58789   | 1.47484    | 0.387782   | -0.406704  |
| RP11-488C13.1   | 4.23066   | 4.18243     | 4.06714   | 4.31653    | 4.98983    | 5.35806    |
| RP11-488C13.5   | 0.640343  | 0.729818    | 0.0606147 | -0.325416  | 0.405666   | -0.151742  |
| RP11-488L18.1   | 0.0654482 | 0.130048    | -0.684793 | 0.202813   | 0.181103   | 0.242645   |
| RP11-488L18.10  | 0.586404  | 0.746683    | 1.5714    | 1.30907    | 0.976371   | -1.06257   |
| RP11-488L18.4   | 3.8943    | 3.87812     | 4.06203   | 4.08962    | 3.84528    | 3.41483    |
| RP11-490H24.5   | 4.55625   | 4.39028     | 5.07385   | 5.37646    | 6.27196    | 6.14673    |
| RP11-495P10.1   | 0.759667  | 0.621234    | 0.524856  | 0.304371   | 0.0376493  | -0.32357   |
| RP11-495P10.10  | 2.14964   | 2.08077     | 1.99081   | 2.2323     | 2.6843     | 2.78589    |
| RP11-497H16.9   | 0.972854  | 1.21625     | 1.6927    | 1.68021    | 2.21683    | 2.39295    |
| RP11-498C9.15   | 3.56067   | 3.54418     | 3.11558   | 3.34601    | 3.49704    | 2.97277    |
| RP11-49C9.2     | 1.88763   | 2.22642     | 1.9003    | 2.27996    | 2.85318    | 3.16946    |
| RP11-49K24.6    | 1.16527   | 1.39684     | -0.100017 | 0.447167   | -1.80233   | 0.744308   |
| RP11-49K24.8    | 1.85237   | 1.94888     | 0.395611  | 0.633543   | -0.681421  | -1.00454   |
| RP11-49K24.9    | 1.3177    | 0.532397    | 1.78336   | 1.05792 ?  | ?          |            |
| RP11-4L24.4     | 3.01997   | 2.97528     | 0.802913  | 0.367002   | 2.39361    | 1.78597    |
| RP11-500C11.3   | 0.146799  | -0.00985836 | 0.0418738 | 0.199462   | 0.00824305 | -0.0694034 |
| RP11-500G22.5   | 0.531688  | 0.549699    | 0.152339  | -0.0503948 | 0.475137   | -0.274569  |
| RP11-500M8.7    | 2.01094   | 2.28948     | 2.19288   | 2.6164     | 1.53567    | 2.07682    |
| RP11-504P24.3   | 1.76604   | 2.02568     | 1.73665   | 1.45318    | 1.62155    | 0.959266   |
| RP11-504P24.8   | 0.980194  | 0.683526    | 1.40161   | 1.01842    | 1.17836    | 0.288725   |
| RP11-506K6.4    | -0.45097  | 0.479758    | 0.174138  | 0.158078   | 2.59944    | 1.85556    |
| RP11-507E23.1   | 2.82278   | 2.86379     | 2.4221    | 2.82335    | 3.57848    | 4.26897    |
| RP11-507K2.6    | 0.80878   | 0.813344    | 0.0260635 | 0.317536   | 0.0946955  | -0.280287  |
| RP11-512F24.1   | 1.7257    | 1.60102     | 1.93811   | 2.32431    | 2.2989     | 1.51408    |
| RP11-513I15.6   | 2.15837   | 1.95973     | 2.87488   | 3.05341    | 2.54008    | 2.41267    |
| RP11-513M16.8   | 0.610039  | 0.477387    | -0.909266 | -0.825773  | 0.0499374  | 0.48553    |
| RP11-516A11.1   | 2.88443   | 3.00596     | 3.64049   | 3.93259    | 5.30007    | 4.52187    |
| RP11-517B11.7   | 0.71885   | 0.980157    | 0.571444  | 0.632724   | 1.44825    | 1.97981    |
| RP11-517H2.6    | 0.592761  | 0.587231    | 1.20324   | 0.692302   | 0.74217    | 0.273313   |
| RP11-517I3.2    | -0.359059 | -0.531913   | -1.01332  | -1.15432   | 1.28622    | 0.972384   |
| RP11-51O6.1     | 7.1585    | 7.11936     | 6.38474   | 6.83818    | 7.3233     | 8.1095     |
| RP11-521B24.4   | 1.44051   | 1.52019     | 0.488988  | 0.19507    | 1.40043    | 0.893261   |
| RP11-524D16_A.3 | -0.744656 | -1.14061    | -1.13882  | -0.682344  | 1.45347    | 0.463298   |
| RP11-525G13.2   | 0.758056  | 0.744497    | -0.964455 | -0.395433  | -0.265199  | -0.456694  |
| RP11-527J8.1    | 0.231764  | 0.122235    | 0.045429  | -0.108685  | 0.395063   | -0.121607  |
| RP11-52A20.2    | 0.470938  | 0.794611    | 1.07392   | 0.95732    | 0.234612   | -0.848487  |
| RP11-530N7.2    | -1.27248  | -1.41808    | 1.13846   | 1.16735    | -0.852709  | -0.214706  |

|                |           |            |            |            |            |             |
|----------------|-----------|------------|------------|------------|------------|-------------|
| RP11-531A24.5  | 0.195852  | 0.407614   | 0.610974   | 0.505972   | 0.147163   | -0.752286   |
| RP11-533F5.2   | 0.0907586 | 0.342077   | -0.499406  | 0.355129   | -0.171115  | 1.30504     |
| RP11-536K7.3   | 0.700511  | 0.259652   | 0.626691   | 0.418233   | 0.562709   | 0.295417    |
| RP11-53I6.1    | 0.125995  | -0.14707   | -0.268132  | -0.0669985 | 0.361701   | 0.951819    |
| RP11-53O19.3   | 1.52978   | 1.78985    | 1.41643    | 1.30907    | 2.62047    | 2.32672     |
| RP11-540B6.6   | 2.50306   | 2.40445    | 2.43488    | 2.31745    | 2.01919    | 1.34861     |
| RP11-543B16.2  | 1.70051   | 1.67376    | 1.10822    | 1.70465    | 2.57526    | 3.12041     |
| RP11-543P15.1  | 4.86446   | 4.78334    | 3.77334    | 4.19597    | 4.94944    | 5.9446      |
| RP11-544A12.8  | 0.417952  | 0.546778   | 0.434134   | 0.129916   | 0.206993   | -0.345445   |
| RP11-545E17.3  | 0.768595  | 0.68698    | 0.0260635  | 0.0612232  | 0.234612   | 1.12623     |
| RP11-545I5.3   | 0.415304  | 0.515591   | 1.42857    | 1.51972    | 1.03135    | 0.719061    |
| RP11-546D6.3   | 2.41587   | 2.39101    | 1.72338    | 1.82773    | 1.78623    | 1.76351     |
| RP11-547D13.1  | 0.255223  | 0.407614   | 0.571444   | 0.879925   | 0.578176   | 0.522196    |
| RP11-54D18.4   | 2.7768    | 2.87512    | 2.06211    | 2.1894     | 3.57802    | 3.26971     |
| RP11-54H7.4    | 2.10184   | 2.60056    | 0.646651   | 1.23007    | 2.67509    | 2.73624     |
| RP11-54O7.3    | ?         | -5.45651   | 0.371169   | 0.591699   | 1.08794    | 1.76905     |
| RP11-550F7.1   | 2.92228   | 3.21128    | 1.973      | 2.66505    | 3.34555    | 3.59807     |
| RP11-552F3.12  | 0.466392  | -1.1369    | 0.140347   | 0.649735   | 0.289362   | -0.229851   |
| RP11-552F3.9   | 0.595055  | 0.81791    | -0.20074   | 0.466914   | 0.0617624  | -0.143752   |
| RP11-552M11.4  | 1.04724   | 1.13005    | 0.984779   | 1.04243    | 1.84861    | 0.373921    |
| RP11-552O4.2   | 1.17411   | 1.42837    | 0.80799    | 1.02146    | 0.339787   | 0.320496    |
| RP11-553L6.5   | 0.980457  | 0.736899   | 3.33611    | 2.6856     | 3.66387    | 2.59708     |
| RP11-555H23.1  | 0.520709  | 0.813919   | -0.095919  | 0.399062   | 0.373208   | 0.126299    |
| RP11-556K13.1  | 1.80664   | 2.19448    | 1.15214    | 1.53313    | 2.38142    | 2.5009      |
| RP11-561B11.2  | 0.670333  | 0.384437   | 1.07985    | -0.0787663 | 0.835746   | 1.45879     |
| RP11-561O23.9  | 0.171399  | 0.331671   | -0.229171  | -0.301307  | 0.679613   | -0.121607   |
| RP11-561O4.1   | 0.319999  | 0.742291   | -0.472385  | 0.412749   | -0.284532  | -0.301195   |
| RP11-565F19.2  | 0.0425183 | -0.177293  | 0.793829   | 0.999755   | 0.815493   | -0.848487   |
| RP11-566E18.1  | 2.84008   | 3.10891    | 2.55458    | 2.62589    | 2.55402    | 2.9515      |
| RP11-566F5.1   | -1.20691  | -0.908293  | 0.132353   | -0.255624  | 0.993819   | 0.707984    |
| RP11-566K19.8  | 2.19982   | 2.07854    | 1.28812    | 2.14992    | 2.31695    | 2.75351     |
| RP11-567G24.1  | 3.91286   | 4.12902    | 4.41431    | 4.87911    | 4.9085     | 4.75087     |
| RP11-567M16.6  | 1.14018   | 0.996642   | 0.208904   | 0.317536   | -0.660096  | -1.4584     |
| RP11-569G13.2  | 1.20786   | 2.06856    | -5.1783    | -6.09892 ? |            | ?           |
| RP11-569G13.3  | 1.11475   | 2.12589 ?  |            | -6.09892   | -6.64581   | -5.69922    |
| RP11-56B16.1   | 0.754905  | 0.930223   | 0.652528   | 0.824409   | 0.887346   | 0.650921    |
| RP11-570P14.1  | 2.19867   | 2.21928    | 1.48161    | 1.62001    | 2.38697    | 2.26263     |
| RP11-571I18.5  | 0.266817  | -0.292758  | 0.597917   | 0.248838   | 2.21315    | 1.67702     |
| RP11-572P18.1  | 7.18757   | 7.07936    | 6.91461    | 7.36183    | 7.48874    | 8.36296     |
| RP11-573D15.9  | 2.03565   | 2.20606    | 2.35952    | 2.57066    | 2.9209     | 2.5787      |
| RP11-574K11.24 | 1.32887   | 1.24456    | 1.662      | 1.52784    | 1.44302    | 0.847941    |
| RP11-574K11.29 | 0.0127117 | -0.0598588 | 0.724633   | 0.597031   | 0.765399   | -0.205848   |
| RP11-574K11.31 | 1.29368   | 1.03699    | 1.62984    | 1.32955    | 1.48115    | 0.257518    |
| RP11-574K11.32 | 2.11087   | 2.23457    | 2.16095    | 2.30993    | 3.1361     | 2.78995     |
| RP11-575F12.3  | 1.98394   | 2.59516    | -6.17309 ? |            | -5.65305   | -4.11926    |
| RP11-575G13.2  | 1.46586   | 1.33161    | 0.544485   | 0.535117   | -0.0378982 | -0.00614162 |
| RP11-575L7.8   | 0.77295   | 0.24496    | 0.510608   | 0.655865   | -0.211872  | -1.36072    |
| RP11-57H14.4   | 1.44562   | 1.49719    | 2.16964    | 2.25313    | 1.70604    | 1.61525     |
| RP11-57K17.1   | 0.266817  | 0.0450795  | -0.428455  | -1.02108   | 0.947083   | -0.183001   |
| RP11-582E3.6   | 0.959191  | 1.12967    | 1.55798    | 1.86848    | 1.25263    | 0.702755    |
| RP11-582J16.4  | 0.688395  | 0.946746   | 0.486828   | -0.40892   | -0.517858  | -0.488546   |
| RP11-582J16.5  | 4.71742   | 4.88595    | 3.07485    | 3.19199    | 3.06143    | 2.74716     |

|                  |            |             |             |            |            |           |
|------------------|------------|-------------|-------------|------------|------------|-----------|
| RP11-585P4.5     | -0.376978  | -0.58       | 0.0260635   | 0.266325   | 0.351018   | 0.315752  |
| RP11-587D21.1    | 1.99257    | 2.20806     | 1.55851     | 1.991      | 2.13963    | 2.5457    |
| RP11-588H23.3    | -3.37567   | -3.73146    | 0.910963    | 0.711398   | 0.958806   | 0.455744  |
| RP11-592N21.1    | 3.52341    | 3.71993     | 2.63113     | 3.02489    | 3.03899    | 3.55359   |
| RP11-597D13.9    | -0.145905  | -0.373783 ? | ?           |            | 1.62229    | 1.15106   |
| RP11-598P20.3    | 1.98042    | 2.19895     | 0.138526    | 0.334214   | 1.06084    | 0.176042  |
| RP11-599J14.2    | 1.71691    | 2.0333      | -5.02295    | -4.67942   | -6.64581   | -4.73995  |
| RP11-59C5.3      | 2.36351    | 2.09819     | 2.1644      | 2.22221    | 1.74794    | 1.1298    |
| RP11-59D5__B.2   | 1.76038    | 1.88148     | -4.18092    | -4.52056   | -4.65668   | -2.70579  |
| RP11-5N19.3      | 0.658554   | 0.491443    | 0.259532    | -0.108685  | -0.356358  | -0.421131 |
| RP11-600F24.7    | 0.61388    | 0.467978    | 0.73541     | 0.902467   | -0.609852  | -1.006    |
| RP11-603J24.17   | 1.32138    | 1.24717     | -0.862992   | 0.422556   | 0.760655   | 0.980895  |
| RP11-603J24.7    | 4.95958    | 4.75902     | 3.72595     | 4.01364    | 3.48494    | 3.62224   |
| RP11-603K19.1    | 1.01831    | 1.19515     | 1.36999     | 1.19196    | 0.411068   | 0.203514  |
| RP11-606P2.1     | 0.92359    | 1.31199     | 0.711372    | 1.22214    | 2.27928    | 2.00067   |
| RP11-609D21.3    | -4.38616 ? |             | 2.13095     | 1.63899    | 2.05348    | 1.30314   |
| RP11-60L3.1      | -0.679236  | 0.591708    | 0.501465    | 1.13306    | -2.21215   | -0.716379 |
| RP11-611O2.3     | 2.312      | 2.38867     | -0.00507566 | 0.0789104  | 0.576048   | 1.02426   |
| RP11-611O2.5     | 1.42514    | 1.48607     | -1.72062    | -0.304637  | -2.25748   | 0.880599  |
| RP11-617F23.1    | 0.338202   | -0.0830877  | 2.64537     | 2.60789    | 0.319086   | -0.71669  |
| RP11-618G20.1    | 1.37958    | 1.39616     | -0.920139   | -0.641572  | 0.888063   | 2.33254   |
| RP11-61F12.1     | 1.37242    | 1.54842     | -0.0134653  | 0.0612232  | -1.41201   | -1.79933  |
| RP11-61L23.2     | 1.81415    | 1.37808     | -0.0969278  | 0.489872   | 2.4707     | 0.691436  |
| RP11-61N20.3     | 1.27629    | 1.46815     | 0.890976    | 1.34031    | 2.59337    | 3.03679   |
| RP11-620J15.3    | 0.312247   | 0.305445    | 1.19157     | 1.38307    | 0.807363   | 1.24753   |
| RP11-624D20.1    | 0.410189   | 0.73754     | 0.641712    | 0.724135   | 0.185993   | -0.121607 |
| RP11-631M6.2     | 2.8104     | 2.75234     | 3.3149      | 3.13959    | 2.82882    | 3.11028   |
| RP11-631M6.3     | 0.701877   | 0.850103    | 1.98141     | 1.38307    | 0.894341   | 0.100762  |
| RP11-631N16.2    | 3.66833    | 4.1592      | 4.0477      | 4.30902    | 2.60179    | 1.92267   |
| RP11-631N16.4    | 2.67162    | 2.77318     | 1.662       | 1.68562    | 0.0677351  | 0.100762  |
| RP11-632C17__A.1 | 5.81998    | 5.65884     | 4.85898     | 5.20824    | 6.17943    | 6.81084   |
| RP11-632K20.7    | 1.93719    | 1.89528     | 2.5333      | 2.88173    | 1.60906    | 1.09704   |
| RP11-635L1.2     | -0.791952  | -0.629746   | 0.488988    | 0.491176   | 0.339787   | -0.38461  |
| RP11-641A6.5     | 1.24186    | 1.49406     | 0.475375    | 0.869982   | 0.832015   | 0.177892  |
| RP11-641D5.1     | 5.52037    | 5.50062     | 5.27567     | 5.62865    | 6.31893    | 6.88113   |
| RP11-644F5.10    | 1.84236    | 1.83411     | 1.25109     | 1.51442    | 0.293782   | -0.326681 |
| RP11-644F5.11    | 1.6585     | 1.2583      | 1.05494     | 1.46107    | -0.0752099 | 0.33778   |
| RP11-649A18.12   | 0.971707   | 0.667574    | 0.533504    | 0.428067   | 0.823676   | 0.572919  |
| RP11-649E7.5     | 4.68657    | 4.87332     | 2.96422     | 3.70812    | 4.70119    | 4.89883   |
| RP11-64B16.2     | 2.79189    | 2.79301     | 1.94021     | 2.35881    | 3.45723    | 3.07836   |
| RP11-64K7.1      | 1.83441    | 2.38382     | 1.7216      | 2.23647    | 2.26041    | 2.44402   |
| RP11-650L12.2    | 1.54757    | 1.45036     | 1.50394     | 1.73966    | 1.74258    | 2.2816    |
| RP11-651P23.4    | 4.152      | 4.16664     | 3.38145     | 3.7847     | 4.0912     | 4.83048   |
| RP11-658F2.8     | 2.48633    | 2.35666     | 3.20975     | 2.89933    | 2.58871    | 1.71503   |
| RP11-65I12.1     | 4.56633    | 4.98019     | -1.46921    | -0.551532  | 0.10912    | 0.1904    |
| RP11-65L3.3      | 1.55566    | 1.39945     | -1.53563    | -1.3165    | 1.09285    | 0.846955  |
| RP11-660L16.2    | 0.727258   | 0.570657    | -0.598354   | -0.55404   | 0.222446   | 0.151378  |
| RP11-661A12.7    | -0.361118  | -0.358883   | 0.0395736   | -0.0539789 | 0.649349   | 0.218682  |
| RP11-661A12.8    | 2.56147    | 2.44164     | 2.20631     | 2.49297    | 2.87111    | 2.92574   |
| RP11-663P9.2     | 0.9387     | 1.00193     | 1.13304     | 1.6487     | 1.77195    | 2.33257   |
| RP11-667K14.4    | -1.72363   | 0.418589    | 0.665029    | -0.299019  | 0.603777   | -0.041579 |
| RP11-66B24.4     | 6.25566    | 6.63193     | 2.40808     | 2.28525    | -0.0239972 | -0.725053 |

|               |            |             |           |            |            |           |
|---------------|------------|-------------|-----------|------------|------------|-----------|
| RP11-66B24.7  | 3.12345    | 3.39476     | -2.86056  | -3.30006   | -6.47696 ? |           |
| RP11-66B24.9  | 2.14014    | 2.52585     | -2.37543  | -2.40763   | -4.65668   | -5.69922  |
| RP11-66N24.3  | 1.51061    | 1.54882     | 1.75929   | 1.70381    | 1.63542    | 1.06691   |
| RP11-66N24.4  | 1.16506    | 1.05367     | 1.17221   | 1.13172    | 1.40716    | 0.60557   |
| RP11-673C5.1  | 6.20266    | 6.15498     | 5.37516   | 5.51594    | 5.39218    | 5.71672   |
| RP11-676M6.1  | 4.30095    | 4.21272     | 4.45845   | 4.85773    | 4.34577    | 4.4112    |
| RP11-67L14.1  | 1.44562    | 1.67674     | -0.229171 | -0.086319  | -2.65941   | -2.12114  |
| RP11-67L2.2   | 1.77668    | 2.02502     | 1.64306   | 1.51326    | 2.01919    | 2.08121   |
| RP11-67L3.5   | 0.233041   | 0.278044    | 0.086118  | 0.11486    | 0.813902   | 0.820011  |
| RP11-680G24.4 | 0.44982    | 0.688655    | 0.570346  | 0.868592   | 1.76047    | 0.711803  |
| RP11-680H20.1 | 3.42422    | 3.50381     | 2.68001   | 3.13201    | 3.52369    | 4.30028   |
| RP11-686D22.7 | 0.940144   | 0.556218    | -1.71745  | -1.95705   | 0.638129   | 0.269524  |
| RP11-686D22.8 | 1.2305     | 0.825989    | -1.04009  | -2.73425   | 0.899245   | 0.695477  |
| RP11-688I9.5  | -0.569597  | 0.676782 ?  |           |            | 0.134221   | 0.293394  |
| RP11-690D19.3 | 0.133932   | 0.6247      | 1.99143   | 1.90801    | 1.71041    | 1.56011   |
| RP11-697N18.3 | 2.26672    | 1.83639     | 1.5913    | 1.87419    | 0.0677351  | -0.619042 |
| RP11-69L16.5  | 5.37843    | 5.43823     | 4.75008   | 5.1442     | 4.75848    | 4.93101   |
| RP11-6O2.3    | 1.5065     | 1.28763     | -0.214925 | -0.0148858 | -0.197201  | -0.978989 |
| RP11-6O2.4    | 2.67549    | 2.30914     | -0.483533 | -0.665688  | 1.21926    | -0.62585  |
| RP11-700P18.1 | 3.5534     | 3.72379     | 2.22274   | 2.78837    | 3.53508    | 3.78631   |
| RP11-701H24.4 | 2.63632    | 2.52301 ?   |           | -6.09892   | 0.578176   | 0.937201  |
| RP11-705C15.2 | 1.35311    | 1.78912     | 2.63027   | 2.68885    | 1.83505    | 2.00221   |
| RP11-705C15.3 | 1.28396    | 1.38268     | 2.49245   | 2.31325    | 1.7868     | 1.48315   |
| RP11-706J10.2 | -0.882238  | -0.982774 ? |           |            | 1.67064    | 2.7534    |
| RP11-708J19.1 | 0.312247   | 0.395227    | 0.259532  | 0.334214   | -0.0454657 | -0.95156  |
| RP11-709A23.1 | 2.16203    | 1.97597     | 0.945825  | 0.761609   | 0.578176   | -0.497071 |
| RP11-70J12.1  | -0.891472  | -1.14061    | -0.325375 | -0.751045  | 0.909612   | 0.816919  |
| RP11-70L8.4   | 3.22688    | 3.17749     | 3.25749   | 3.14844    | 3.74473    | 3.53259   |
| RP11-713C19.2 | 0.440942   | 0.787917    | -0.011668 | 0.535924   | 0.339787   | 0.36051   |
| RP11-715J22.6 | 0.701877   | 0.559609    | 0.259532  | 0.300663   | -0.338214  | -1.06257  |
| RP11-717F1.2  | 4.84421    | 4.6403      | 4.69457   | 4.51953    | 2.75219    | 1.77354   |
| RP11-722G7.1  | 1.51696    | 1.69003     | 2.10247   | 2.10618    | 0.809291   | -0.374118 |
| RP11-726G1.1  | 4.26717    | 4.52549     | 1.5431    | 0.877446   | -3.93681   | -4.09509  |
| RP11-727A23.5 | 2.0845     | 2.05612     | 2.34656   | 2.2749     | 1.93847    | 1.31864   |
| RP11-728B21.3 | 1.58408    | 1.7559      | 0.122355  | 0.463309   | 0.979001   | 1.1872    |
| RP11-72I8.1   | -0.026521  | -0.0197685  | 0.662041  | 0.28359    | -0.338214  | -1.12145  |
| RP11-730G20.2 | 3.60431    | 3.33279     | 3.37313   | 3.43986    | 3.01054    | 3.03855   |
| RP11-731C17.2 | -0.0990262 | -0.0876659  | 1.5647    | 1.30907    | -0.572647  | -1.18284  |
| RP11-734E19.1 | -0.651496  | -0.237583   | -0.620441 | 0.0318469  | 0.689729   | 1.12122   |
| RP11-734K2.4  | 1.46586    | 1.50157     | 2.50998   | 2.40294    | -0.356358  | -0.609865 |
| RP11-734K23.9 | -1.57311   | -1.07955    | -0.386284 | -1.20284   | 1.78121    | -0.220525 |
| RP11-737O24.3 | 1.51447    | 1.44577     | 3.02315   | 3.10388    | 2.34705    | 2.42577   |
| RP11-73M18.10 | 0.131076   | 0.922586    | -0.422033 | -0.301449  | 0.423524   | 0.69447   |
| RP11-73M18.2  | 0.826201   | 0.236744    | -1.89446  | 0.473735   | -0.147495  | 0.872726  |
| RP11-73M18.6  | 0.243547   | 0.223769    | 0.120378  | -0.301307  | 0.197777   | -0.536593 |
| RP11-73M18.7  | 0.996034   | 0.685025    | 0.272059  | 0.176795   | 1.11684    | 0.84004   |
| RP11-73M18.8  | 1.88591    | 1.81795     | 1.26773   | 1.30061    | 2.1726     | 2.04819   |
| RP11-742D12.2 | 2.53342    | 2.89691     | -5.1783   | -3.30006   | -2.95876   | -3.38329  |
| RP11-745A24.1 | -0.239491  | -0.333394   | -0.350462 | -0.585061  | 0.901996   | 0.443129  |
| RP11-74E24.2  | 3.09569    | 3.14327     | 2.54941   | 2.7878     | 2.8887     | 2.86853   |
| RP11-752D24.2 | 0.0152977  | 0.0918691   | 0.747284  | 0.100749   | -0.267833  | -1.24695  |
| RP11-752G15.4 | -0.128497  | 0.201483    | -0.255615 | 0.193355   | 0.278698   | -0.22104  |

|                |            |           |           |           |            |           |
|----------------|------------|-----------|-----------|-----------|------------|-----------|
| RP11-756P10.3  | 1.76129    | 1.75683   | 1.44522   | 1.88592   | 3.26596    | 3.46281   |
| RP11-756P10.6  | -0.312954  | -0.130062 | 0.945473  | 1.47139   | 2.95174    | 3.03498   |
| RP11-75A9.3    | -0.549135  | -0.734698 | 1.13846   | 1.12005   | -0.121008  | -0.151977 |
| RP11-75C10.6   | 0.735617   | 0.840999  | 0.571444  | 0.139221  | 0.489522   | -0.799586 |
| RP11-75L1.2    | 4.76767    | 4.74341   | 4.73377   | 5.18947   | 5.59293    | 6.04872   |
| RP11-761N21.2  | 6.09066    | 5.96456   | 4.99703   | 5.41319   | 6.08107    | 6.94615   |
| RP11-762H8.2   | 0.0559314  | -0.036446 | -0.455418 | -0.52367  | 1.65261    | 0.752791  |
| RP11-766H1.1   | 0.0936819  | 0.0355113 | 0.623127  | 1.24258   | 1.33093    | 1.62891   |
| RP11-767L7.1   | -0.0407343 | -0.46266  | 0.706632  | 0.798133  | -0.490197  | -0.799586 |
| RP11-767N6.2   | 0.631914   | 0.766044  | 1.68687   | 1.30061   | 0.706084   | 0.0213376 |
| RP11-76E16.2   | 1.44677    | 1.36775   | 0.641102  | 0.89714   | 1.72125    | 1.00218   |
| RP11-76H14.2   | 0.846578   | 0.399204  | 0.749157  | 0.551019  | 0.450243   | 0.267883  |
| RP11-778D9.4   | 4.04782    | 4.1136    | 3.35418   | 3.86447   | 3.2719     | 3.6816    |
| RP11-77H9.2    | 1.10605    | 0.892508  | 0.92267   | 0.928306  | 1.14501    | 0.748521  |
| RP11-77P6.2    | 0.784805   | 0.929533  | 0.503064  | 0.672606  | -0.23389   | -0.577229 |
| RP11-78A19.3   | -0.27139   | -0.351176 | 1.21228   | 1.46439   | 1.33764    | 0.376813  |
| RP11-791G16.4  | 1.58852    | 1.74831   | 0.671991  | 1.17217   | 1.39344    | 1.10913   |
| RP11-792A8.4   | 0.42722    | 0.574751  | 0.446066  | 0.0290641 | 1.56848    | 1.07138   |
| RP11-793H13.8  | 2.22794    | 1.86085   | 2.31646   | 2.21908   | 1.06998    | 1.42793   |
| RP11-795H16.2  | 0.0711036  | 0.602628  | -0.325375 | -0.108685 | 0.599356   | 0.702755  |
| RP11-796G6.1   | 2.46697    | 2.55514   | 2.52589   | 2.81583   | 3.70498    | 4.16177   |
| RP11-797A18.5  | 1.00142    | 0.831845  | 0.759062  | 0.445854  | 0.185296   | -0.536593 |
| RP11-798G7.8   | 1.97337    | 2.08021   | 2.64938   | 2.36286   | 1.48439    | 0.68568   |
| RP11-798M19.6  | -0.191134  | 0.107125  | 0.120378  | 0.445854  | 0.757612   | -0.247123 |
| RP11-79H23.3   | 0.710384   | 1.27191   | 1.19157   | 1.95729   | -2.13612   | -1.79933  |
| RP11-79P5.10   | 1.78661    | 1.55228   | 0.991289  | 1.19956   | 2.70417    | 3.13368   |
| RP11-803D5.1   | 3.05247    | 2.83866   | 3.87852   | 3.66925   | 3.32126    | 1.81688   |
| RP11-805J14.5  | 2.15551    | 2.02899   | 1.72018   | 2.00105   | 1.33287    | 2.20679   |
| RP11-810K23.10 | -6.68418 ? |           | 0.623914  | -0.40821  | 0.757612   | 0.522196  |
| RP11-815I9.4   | 1.13537    | 0.611871  | 1.27058   | 1.31113   | 1.40933    | 0.726953  |
| RP11-815J4.6   | 2.99663    | 3.10625   | 1.79418   | 2.09884   | 2.02315    | 1.94585   |
| RP11-817I4.1   | 1.56305    | 1.81331   | 1.76487   | 1.72409   | 2.30549    | 1.76905   |
| RP11-817I4.2   | 1.30659    | 1.3381    | 1.45314   | 1.42259   | 2.36761    | 1.33772   |
| RP11-819C21.1  | -0.791952  | -0.790185 | 0.882627  | 0.902467  | 1.1211     | 0.769095  |
| RP11-819M15.1  | 0.676574   | 0.854666  | -0.303246 | 0.20137   | 0.579441   | 1.45063   |
| RP11-81A1.6    | 2.18968    | 2.12963   | 2.17405   | 2.12001   | 1.29393    | 0.270672  |
| RP11-822E23.8  | -0.307901  | -0.108884 | -3.32027  | -0.989151 | 0.339525   | 1.37558   |
| RP11-823P9.3   | -0.386559  | -0.466987 | 1.15887   | 0.967611  | 0.327503   | -0.4389   |
| RP11-829H16.2  | 0.370388   | 0.592876  | 0.684774  | 0.994247  | 1.89106    | 1.88747   |
| RP11-82H13.2   | 0.0316352  | 0.719131  | -0.271435 | 0.0510519 | 1.12949    | 0.819783  |
| RP11-832N8.1   | 1.95928    | 2.13508   | 1.55901   | 1.94335   | 1.67309    | 1.90264   |
| RP11-834C11.4  | 1.31777    | 1.46201   | -1.79072  | -1.30113  | -0.450674  | 0.0213376 |
| RP11-83A24.2   | 2.08884    | 2.15188   | 2.44585   | 2.22658   | 2.03923    | 1.52391   |
| RP11-843B15.4  | 0.430296   | 0.766044  | 0.156448  | 0.176693  | 1.01923    | 0.668401  |
| RP11-848G14.5  | 1.41382    | 1.27675   | 2.44893   | 2.05243   | 2.79462    | 1.88889   |
| RP11-849F2.7   | -0.18843   | -0.258677 | 0.732842  | 0.522116  | 1.15699    | 0.871576  |
| RP11-849H4.2   | 1.31777    | 1.29209   | 1.6426    | 1.35065   | 0.210164   | 0.253699  |
| RP11-849H4.4   | 2.9607     | 3.09816   | 3.01474   | 3.0579    | 2.30541    | 1.77308   |
| RP11-849N15.3  | 1.61792    | 1.29635   | -2.30935  | -1.24688  | 0.0514974  | -0.302441 |
| RP11-863K10.4  | 1.13876    | 0.925605  | 0.609121  | 0.978166  | 1.40625    | 1.60376   |
| RP11-863P13.3  | 0.462136   | 0.716051  | -0.25649  | 0.46777   | -6.64581 ? |           |
| RP11-864I4.1   | 2.35383    | 2.50513   | 2.51476   | 2.80056   | 1.90808    | 1.3057    |

|               |             |            |             |           |           |            |
|---------------|-------------|------------|-------------|-----------|-----------|------------|
| RP11-864N7.2  | 5.30296     | 5.29147    | 4.68793     | 5.06357   | 6.24436   | 7.17489    |
| RP11-867G23.3 | 0.636116    | 0.376157   | 0.597488    | 0.519954  | -0.077076 | -0.520316  |
| RP11-872J21.5 | 0.743937    | 0.727049   | 0.571444    | 0.57776   | 0.185296  | -0.0341529 |
| RP11-876N24.3 | 1.04917     | 0.920895   | 0.768146    | 1.00472   | -0.729349 | -1.99869   |
| RP11-876N24.5 | 1.06916     | 0.859151   | 0.838911    | 0.698601  | -0.374735 | -1.06257   |
| RP11-879F14.2 | 1.48029     | 1.70711    | -0.00120949 | 0.107005  | -2.85193  | -2.8983    |
| RP11-87H9.4   | 2.60699     | 2.62728    | 1.82773     | 1.70499   | 4.93307   | 4.19264    |
| RP11-87H9.5   | 0.0289651   | -0.233871  | -1.59814    | -2.30078  | 2.14384   | 1.52214    |
| RP11-884K10.7 | 1.32887     | 1.39518    | 0.225978    | 0.158078  | 0.625168  | 0.847941   |
| RP11-887P2.3  | 4.25971     | 4.17905    | 4.76694     | 5.09883   | 6.09696   | 5.73658    |
| RP11-889L3.1  | 5.4417      | 5.42584    | 4.85072     | 5.35302   | 5.76685   | 6.15945    |
| RP11-88I18.2  | 1.05066     | 0.845671   | 0.199688    | 0.412966  | 3.34288   | 2.85163    |
| RP11-890B15.3 | 1.92665     | 1.9035     | 2.4312      | 2.48738   | 2.86522   | 2.95507    |
| RP11-894P9.1  | 2.64522     | 2.52869    | 2.05967     | 2.03585   | 2.90384   | 1.62424    |
| RP11-8H2.1    | 0.776727    | 0.97184    | -0.509247   | 0.57776   | 0.529601  | 0.864232   |
| RP11-90H3.1   | 3.56163     | 3.70172    | 3.36786     | 3.51823   | 3.58384   | 4.05176    |
| RP11-90L20.2  | 0.684702    | 0.61405    | 0.64945     | 0.57776   | -2.13612  | -2.12114   |
| RP11-92K2.2   | 4.97327     | 4.95589    | 4.19365     | 4.55887   | 4.89134   | 6.24284    |
| RP11-932O9.10 | 0.558395    | 0.727049   | 0.636738    | 0.749225  | -0.777433 | -2.38405   |
| RP11-936I5.1  | 0.563861    | 0.407614   | 0.56222     | 0.392724  | 0.285911  | -0.499608  |
| RP11-956A19.1 | 0.0289651   | 0.223769   | -0.0541032  | 0.0410467 | 0.539452  | -0.536593  |
| RP11-958N24.1 | -0.00348109 | -0.479329  | 0.951901    | 1.25515   | -0.284875 | 0.245252   |
| RP11-95D17.1  | 1.9484      | 1.96763    | 0.174138    | 0.100749  | 1.56854   | 1.35942    |
| RP11-95M15.2  | 1.53762     | 1.63237    | 0.768908    | 1.18402   | 1.32121   | 1.19776    |
| RP11-966I7.2  | -1.99808    | -2.37465   | 0.416483    | 0.334214  | 0.901996  | 0.224139   |
| RP11-96D1.10  | -0.0537932  | -0.476165  | 0.90411     | 1.10491   | 0.432275  | -0.574854  |
| RP11-96D1.11  | -0.256202   | 0.0542233  | 0.712763    | 0.124566  | 0.0274089 | 0.439304   |
| RP11-96D1.8   | 0.976371    | 1.34425    | 1.57048     | 1.69752   | 1.88935   | 1.04096    |
| RP11-96H19.1  | -0.791952   | -0.818747  | 1.90397     | 1.68562   | -0.615709 | -0.899103  |
| RP11-96K19.4  | -0.470075   | -0.233871  | 0.986462    | 0.773887  | -0.932127 | -2.00571   |
| RP11-972P1.7  | 0.385928    | 0.285071   | 0.483891    | 0.470115  | 0.557601  | -0.956507  |
| RP11-97C16.1  | 0.470938    | 0.166625   | -0.095919   | -0.301307 | 0.246688  | -0.0627204 |
| RP11-97O12.6  | 0.133932    | -0.122851  | 0.782333    | 0.317536  | 0.0812851 | -1.31405   |
| RP11-981G7.1  | -0.998365   | -0.214764  | 0.156448    | 0.020584  | 1.83157   | 1.66836    |
| RP11-981G7.6  | -1.94365    | -2.06994   | -1.72363    | -1.30113  | 1.60651   | 1.00759    |
| RP11-983P16.4 | 2.9056      | 2.6455     | 2.49185     | 2.45248   | 2.0298    | 1.62471    |
| RP11-98I9.4   | 1.09678     | 1.00482    | 1.52608     | 1.69391   | 1.75043   | 1.61625    |
| RP11-98J23.1  | 1.99914     | 1.7367     | 3.28702     | 2.86009   | 2.42525   | 1.30082    |
| RP11-98J23.2  | 0.590147    | 0.502616   | 1.47686     | 1.21552   | 0.817975  | 1.61167    |
| RP11-9E17.1   | 2.51525     | 2.30866    | 1.91979     | 1.98395   | 1.5394    | 1.42261    |
| RP11-9L18.2   | 4.47518     | 4.57718    | 4.29826     | 4.62408   | 4.40376   | 3.97639    |
| RP13-1032I1.7 | 1.94458     | 1.91676    | 1.47532     | 1.60136   | 1.92062   | 1.63198    |
| RP13-104F24.1 | -0.633667   | -0.0472072 | 0.213055    | 0.466591  | 0.643902  | 0.432446   |
| RP13-104F24.2 | 0.798084    | 0.514188   | 1.6564      | 1.83678   | 1.88479   | 1.11139    |
| RP13-104F24.3 | 1.68293     | 1.70395    | 1.33783     | 1.49028   | 2.05016   | 1.73886    |
| RP13-258O15.1 | 3.19787     | 3.20112    | 3.12224     | 3.41702   | 4.22986   | 5.18669    |
| RP13-383K5.4  | 1.54639     | 1.80278    | 0.401532    | 0.927388  | 2.73519   | 3.24364    |
| RP13-39P12.2  | 0.0811896   | 0.243279   | 0.812802    | 0.599089  | 0.718956  | 0.0963293  |
| RP13-39P12.3  | 0.729453    | 0.576822   | 1.86742     | 1.7747    | 0.733996  | 1.46499    |
| RP13-444K19.1 | 0.415705    | 0.453502   | -0.287228   | 0.626224  | 0.73014   | 1.62833    |
| RP13-516M14.8 | 0.458781    | 0.324626   | 1.35197     | 0.866006  | 1.58239   | 1.18945    |
| RP13-735L24.1 | 3.27947     | 3.69494    | -2.36195    | -2.7648   | -3.37228  | -3.93762   |



|               |           |            |            |            |            |           |
|---------------|-----------|------------|------------|------------|------------|-----------|
| RP13-88F20.1  | 2.09963   | 2.51729    | 2.55209    | 3.17234    | 2.98222    | 2.89425   |
| RP13-890H12.2 | -1.55256  | -1.35527   | -0.144387  | -0.0380404 | 0.844603   | 0.896574  |
| RP2           | 2.91931   | 3.05876    | 3.30029    | 3.81747    | 3.52705    | 3.63314   |
| RP3-323A16.1  | 4.02652   | 4.07342    | 2.00938    | 2.56335    | 2.78063    | 2.84736   |
| RP3-329A5.8   | 0.768595  | 0.868134   | 1.3479     | 0.724135   | 3.3098     | 2.10709   |
| RP3-331H24.6  | 3.42892   | 3.00883    | 2.16522    | 2.05107    | 2.75544    | 2.47321   |
| RP3-331H24.7  | 2.53215   | 2.36054    | 1.42385    | 1.2041     | 2.01214    | 1.92993   |
| RP3-337O18.9  | 1.23322   | 1.25939    | 0.511063   | 0.764924   | 0.160275   | -0.251049 |
| RP3-340B19.2  | 1.93334   | 1.87709    | 1.99145    | 2.37194    | 2.28508    | 3.44289   |
| RP3-347M6.2   | 1.53621   | 1.71933    | 1.37111    | 1.78092    | 1.72037    | 1.21301   |
| RP3-368A4.5   | 3.14765   | 3.24521    | 4.36558    | 4.16818    | 4.44542    | 3.55292   |
| RP3-368A4.6   | 3.47335   | 3.46048    | 4.62543    | 4.36081    | 4.37792    | 4.09903   |
| RP3-394A18.1  | 4.14007   | 4.18599    | 5.12061    | 4.85212    | 4.09626    | 3.6397    |
| RP3-405J10.3  | 1.78476   | 1.58158    | 2.00137    | 2.15329    | 0.587701   | 0.200291  |
| RP3-417G15.1  | 5.44276   | 5.44692    | 5.09089    | 5.29373    | 6.19741    | 6.93273   |
| RP3-425C14.4  | 1.66727   | 1.72206    | 2.0549     | 1.97335    | 2.69505    | 2.66833   |
| RP3-425P12.4  | 2.91061   | 2.72897    | 1.98634    | 2.03587    | 2.06027    | 1.97056   |
| RP3-426I6.2   | -0.697341 | -0.521923  | -0.598354  | -0.24681   | 0.776887   | 1.05084   |
| RP3-428L16.2  | -0.914271 | -1.25306   | -2.48229   | -1.85786   | 4.69541    | 5.07138   |
| RP3-437C15.1  | 2.66982   | 2.17285    | 1.24455    | 1.83046    | 2.62549    | 2.58879   |
| RP3-449O17.1  | 1.60218   | 1.21219    | 1.40502    | 1.08021    | -0.0172083 | -1.06302  |
| RP3-452M16.1  | 1.07717   | 1.36223    | 0.894899   | 1.45325    | 1.73236    | 2.3946    |
| RP3-461F17.3  | 2.14519   | 2.26329    | 1.31632    | 1.84903    | 1.47668    | 2.41309   |
| RP3-468K18.6  | 0.207918  | 0.357428   | -0.428455  | -0.40821   | 0.509706   | 0.100762  |
| RP3-469D22.1  | 0.37669   | -0.0181035 | 1.52439    | 2.38253    | 2.37699    | 3.27036   |
| RP3-486I3.4   | 3.80801   | 3.79849    | 3.08212    | 3.59228    | 4.46507    | 5.16621   |
| RP3-497J21.1  | -0.138964 | -0.84529   | 2.19887    | 2.63572    | 0.954018   | 1.17384   |
| RP3-508I15.9  | 1.39869   | 1.37335    | 1.47445    | 1.35246    | -0.401587  | -1.42604  |
| RP3-514P16.1  | 1.58436   | 1.74957    | 1.90794    | 2.51591    | 1.7091     | 2.05446   |
| RP4-530I15.9  | 1.66407   | 1.53018    | 2.39494    | 2.55176    | 2.00474    | 1.25833   |
| RP4-539M6.19  | 1.1009    | 0.803946   | -1.84577   | 0.751524   | 0.31808    | 0.2885    |
| RP4-555D20.1  | 0.87014   | 1.06117    | 1.45381    | 1.70941    | 1.15255    | 0.765238  |
| RP4-555D20.2  | 2.73991   | 3.03491    | 3.53742    | 3.8356     | 3.43       | 3.06556   |
| RP4-563E14.1  | 0.567789  | 0.635262   | 0.242852   | 0.0612232  | -0.356358  | -1.4584   |
| RP4-564F22.5  | 1.07577   | 1.15925    | -0.0541032 | 0.698601   | 0.270529   | -0.577229 |
| RP4-569M23.2  | 1.88215   | 1.9925     | 2.20451    | 1.69211    | 1.24663    | 1.1007    |
| RP4-569M23.4  | 1.09539   | 0.559609   | 0.986462   | 0.724135   | -0.267833  | -0.577229 |
| RP4-569M23.5  | 1.01134   | 0.813344   | 1.20023    | 0.631505   | 0.210164   | -0.643045 |
| RP4-575N6.2   | -0.366535 | -0.437066  | 0.0639033  | 0.263263   | 1.15534    | 1.52361   |
| RP4-583P15.15 | 1.2347    | 1.04303    | 1.12883    | 1.30249    | 1.61995    | 0.872372  |
| RP4-591C20.9  | 2.78273   | 2.45006    | 2.541      | 2.6856     | 1.5829     | 0.951558  |
| RP4-591N18.2  | 0.430296  | 0.537236   | 0.386425   | -0.154483  | -0.510371  | -1.70626  |
| RP4-592A1.2   | 4.08682   | 4.17879    | 3.65277    | 3.97515    | 4.4606     | 4.76678   |
| RP4-595K12.2  | -0.470479 | 0.0648139  | -0.663086  | 0.315218   | -0.336315  | 1.07087   |
| RP4-604A21.1  | 0.147945  | 0.253372   | -0.325375  | 0.276794   | 1.63935    | 1.3217    |
| RP4-614O4.13  | -0.17598  | -0.617481  | 0.990439   | 0.966807   | 0.1396     | -0.799586 |
| RP4-621F18.2  | 0.292735  | 0.896132   | 1.4209     | 1.60958    | 0.111525   | 0.159022  |
| RP4-635A23.6  | 1.26097   | 1.09945    | 1.31637    | 0.989263   | 0.83161    | 0.483199  |
| RP4-639F20.1  | -0.129081 | -0.105152  | -0.455418  | -0.201784  | 2.69505    | 2.82857   |
| RP4-641G12.4  | 0.922145  | 1.27847    | -0.0698743 | 0.579702   | 0.484056   | 0.457142  |
| RP4-657D16.3  | 0.855192  | 1.11479    | 1.47626    | 1.50086    | 0.934698   | -0.280422 |
| RP4-665J23.1  | 1.15272   | 1.01295    | 1.66826    | 1.57771    | -1.10542   | -1.24695  |

|               |           |           |            |           |             |            |
|---------------|-----------|-----------|------------|-----------|-------------|------------|
| RP4-669L17.10 | 1.66367   | 1.59445   | 0.90995    | 0.92448   | 0.535316    | -0.785617  |
| RP4-671O14.6  | -0.359059 | -0.531171 | 1.04535    | 1.03078   | -4.33548 ?  |            |
| RP4-682C21.2  | 1.98932   | 2.02757   | 1.93381    | 2.04364   | 2.16661     | 2.09799    |
| RP4-706A16.3  | 6.49913   | 6.43905   | 5.34947    | 5.86521   | 5.8881      | 6.55901    |
| RP4-714D9.5   | 1.28396   | 1.42594   | 0.956086   | 0.786061  | 0.625168    | 0.359476   |
| RP4-717I23.3  | 1.86324   | 1.75635   | 3.00383    | 2.93557   | 2.71256     | 2.01491    |
| RP4-724E16.2  | 1.27756   | 1.61163   | 2.41999    | 2.05392   | 1.59937     | 0.586856   |
| RP4-730K3.3   | -0.144345 | -0.140771 | 0.460428   | 0.317536  | -0.00196773 | -0.0918635 |
| RP4-742J24.2  | 2.07471   | 1.87749   | 0.439049   | 0.244607  | 2.20391     | 1.82955    |
| RP4-756G23.5  | -0.367715 | -0.11187  | -0.0740401 | 0.485458  | 0.32633     | 0.393844   |
| RP4-756H11.5  | 2.7534    | 2.72258   | 2.54008    | 2.83425   | 3.18965     | 3.50208    |
| RP4-758J18.13 | 1.20183   | 1.33161   | 0.324373   | 1.0511    | 0.83161     | 0.863209   |
| RP4-758J18.2  | 2.88293   | 2.85578   | 3.21537    | 3.47264   | 3.57165     | 3.68653    |
| RP4-761J14.8  | 1.91145   | 2.2075    | 1.60282    | 1.00457   | 1.1698      | 1.82412    |
| RP4-765C7.2   | 0.14672   | 0.489337  | 2.67482    | 3.17625   | 3.66494     | 4.58281    |
| RP4-769N13.6  | 1.22687   | 1.37673   | 1.75204    | 1.65671   | 1.76384     | 1.95488    |
| RP4-773N10.4  | 3.09736   | 3.05089   | 2.90857    | 3.12      | 2.67509     | 1.84355    |
| RP4-775C13.1  | 4.25631   | 4.37875   | 2.83669    | 3.1979    | 4.35671     | 4.52766    |
| RP4-778K6.1   | 0.549235  | 0.560001  | 0.218868   | 0.606044  | 1.94305     | 1.90064    |
| RP4-781K5.2   | 0.782023  | 0.93946   | 1.45403    | 1.48894   | 1.61053     | 0.966822   |
| RP4-785G19.2  | 1.28757   | 1.71789   | 0.47228    | 0.838573  | 1.5137      | 1.84288    |
| RP4-791C19.1  | 0.736085  | 1.37774   | -0.496037  | -0.455228 | 0.458014    | 0.868292   |
| RP4-798A10.2  | 1.15185   | 1.13173   | 1.44923    | 1.57534   | 0.99041     | 0.315578   |
| RP4-800G7.2   | 2.22813   | 2.15152   | 1.96922    | 2.16324   | 1.6637      | 1.00248    |
| RP4-814D15.1  | 0.85642   | 0.848502  | 1.30327    | 1.05971   | 0.804756    | 0.837935   |
| RP4-814D15.2  | 0.634798  | 0.45982   | 1.07448    | 0.606243  | -0.411902   | -0.457667  |
| RP5-1009N12.1 | 0.927995  | 1.03116   | -0.177962  | 0.591067  | 0.650434    | 1.02717    |
| RP5-1014D13.2 | 4.39496   | 4.42333   | 3.48728    | 3.59432   | 3.80587     | 3.41523    |
| RP5-1021I20.5 | 1.23312   | 1.04232   | 0.126101   | -0.146087 | 0.837354    | -0.116012  |
| RP5-1033H22.2 | 0.427338  | 0.144386  | 1.3278     | 1.52384   | 0.182107    | -0.525621  |
| RP5-1039K5.12 | 3.19157   | 3.24783   | 1.31734    | 1.0044    | 2.24788     | 1.77208    |
| RP5-1039K5.19 | 7.55749   | 7.35837   | 3.16033    | 3.08416   | 2.70629     | 1.81126    |
| RP5-1041C10.3 | -0.113974 | -0.139533 | 0.612258   | 0.619178  | -0.216341   | -1.53419   |
| RP5-1042I8.7  | 0.159022  | -0.214764 | 0.00643448 | -0.086319 | -0.0903144  | 0.270672   |
| RP5-1056L3.3  | 1.26625   | 1.50054   | 1.91151    | 2.44798   | 2.8465      | 3.57843    |
| RP5-1068E13.7 | 1.07577   | 0.988427  | 0.636738   | 1.01017   | -0.594016   | -1.18284   |
| RP5-1074L1.4  | 3.70713   | 3.79218   | 3.42566    | 3.0933    | 3.19612     | 2.39659    |
| RP5-1085F17.3 | 3.33159   | 3.31688   | 2.4312     | 2.53143   | 2.6135      | 1.55071    |
| RP5-1086K13.1 | 0.243547  | 0.61405   | -2.01303   | -1.71605  | 2.2254      | 1.86317    |
| RP5-1099D15.1 | 1.98393   | 1.93504   | 1.55127    | 1.82915   | 2.79671     | 2.66321    |
| RP5-1112D6.7  | -0.255978 | -0.27286  | -0.276471  | -0.154483 | 0.749157    | 0.200291   |
| RP5-1112D6.8  | 1.03142   | 1.17997   | 1.28056    | 1.07475   | 2.00881     | 1.48005    |
| RP5-1126H10.2 | 0.85239   | 0.786111  | 1.05558    | 0.593469  | 0.718842    | 0.099376   |
| RP5-1142A6.2  | 1.36334   | 0.936327  | 0.197891   | 0.207056  | -0.276835   | -0.395562  |
| RP5-1142A6.9  | 2.31054   | 2.13523   | 1.86285    | 1.96861   | 1.20351     | 0.531988   |
| RP5-1186N24.3 | -0.494851 | -0.855202 | -0.205608  | 0.118413  | 0.827998    | 1.71308    |
| RP5-821D11.7  | 1.66853   | 1.53968   | 2.06122    | 2.07328   | 1.07176     | 0.723305   |
| RP5-827C21.1  | 0.580145  | 0.485035  | -0.894282  | 0.0224033 | 0.750358    | 1.51616    |
| RP5-849H19.3  | 0.460879  | 0.370142  | 0.610974   | 0.430424  | 0.0122397   | -1.61882   |
| RP5-850E9.3   | 2.94372   | 3.3056    | 4.88963    | 5.68741   | 3.51263     | 3.4542     |
| RP5-854E16.2  | 0.536898  | 0.750426  | 0.374778   | 0.850223  | 0.713265    | 0.143694   |
| RP5-857K21.11 | 4.06744   | 4.05482   | 4.57219    | 4.49665   | 4.87447     | 4.03306    |

|               |           |            |           |            |            |           |
|---------------|-----------|------------|-----------|------------|------------|-----------|
| RP5-857K21.6  | 8.35037   | 8.19948    | 9.18483   | 8.96354    | 8.84375    | 8.64566   |
| RP5-857K21.7  | 3.64408   | 3.3982     | 4.38524   | 4.12357    | 4.5503     | 3.28757   |
| RP5-867C24.1  | -0.159773 | -0.0598438 | 0.584741  | 0.334214   | -0.0163223 | -0.536593 |
| RP5-881P19.7  | -0.255978 | -0.122853  | 1.0357    | 0.786061   | -1.07506   | -2.00571  |
| RP5-884M6.1   | 1.61384   | 1.7515     | -1.65952  | -0.086319  | -6.64581 ? |           |
| RP5-890E16.2  | 1.34536   | 1.64571    | 0.517004  | 0.999755   | -0.729347  | -0.799586 |
| RP5-894A10.2  | 0.684702  | 0.740617   | -0.346777 | -0.201784  | 0.449514   | -0.183001 |
| RP5-894A10.6  | 1.63187   | 1.59247    | 1.20023   | 0.989263   | 1.65713    | 1.24753   |
| RP5-908M14.10 | 0.684702  | 0.727049   | 0.474784  | 0.476226   | -0.200727  | -1.24695  |
| RP5-908M14.9  | 0.640852  | 0.548466   | -0.757028 | -0.716287  | 0.448309   | 0.315752  |
| RP5-940J5.6   | 2.30097   | 2.40761    | 2.03924   | 2.10998    | 2.37777    | 2.03783   |
| RP5-961K14.1  | 1.13354   | 1.48858    | 0.455607  | 1.06891    | 0.8595     | 0.584626  |
| RP5-965G21.3  | 3.26292   | 3.49664    | -2.27595  | -1.42267   | -0.797576  | -1.70626  |
| RP5-965G21.4  | 2.84782   | 3.13893    | -1.93506  | -1.30113   | 0.0263185  | -0.421131 |
| RP5-965G21.5  | 2.11472   | 2.041      | -3.59683  | -3.78492   | -1.45047   | -2.53597  |
| RP5-965G21.6  | 1.88966   | 1.57611    | -2.27595  | -0.938639  | -0.878698  | -1.38442  |
| RP5-967N21.11 | 0.900281  | 1.06853    | 0.980757  | 0.967383   | 0.86132    | 0.262565  |
| RP5-984P4.6   | 1.95199   | 1.49719    | -0.539572 | -1.16509 ? |            | ?         |
| RP5-991G20.1  | 1.87327   | 1.73733    | 2.68959   | 2.66382    | 1.69249    | 1.62367   |
| RP6-109B7.2   | -0.255978 | -0.39658   | 0.27602   | 0.300663   | -0.0163223 | 0.293394  |
| RP6-159A1.2   | 1.66836   | 1.6861     | 1.19147   | 1.65477    | 1.65399    | 1.83816   |
| RP6-218J18.2  | 3.4636    | 3.57547    | 3.09458   | 3.31302    | 3.51702    | 3.02833   |
| RP6-99M1.3    | 0.558395  | 0.444137   | 0.571444  | 0.549472   | 0.782702   | -0.899103 |
| RP9           | 3.09215   | 3.0288     | 2.26014   | 2.3877     | 2.71692    | 2.66608   |
| RP9P          | 1.34514   | 1.42048    | 1.79282   | 2.09005    | 1.4004     | 0.793488  |
| RPA1          | 5.28821   | 4.55397    | 5.49332   | 5.14502    | 5.98603    | 5.11424   |
| RPA2          | 4.89841   | 4.88255    | 3.07387   | 3.50581    | 4.781      | 5.24967   |
| RPA3          | 3.88962   | 3.8702     | 3.98363   | 4.38298    | 3.77431    | 4.9281    |
| RPAIN         | 3.92199   | 3.96902    | 4.21835   | 4.46621    | 4.98773    | 4.89697   |
| RPAP1         | 3.70712   | 3.62197    | 3.46574   | 3.58117    | 3.88465    | 3.6618    |
| RPAP2         | 4.12825   | 4.3453     | 4.65252   | 4.67744    | 4.63028    | 4.7981    |
| RPAP3         | 4.81515   | 4.98423    | 4.35466   | 4.66182    | 4.32126    | 4.929     |
| RPARP-AS1     | 2.16404   | 2.06778    | 1.37735   | 1.40658    | 1.40098    | 1.13384   |
| RPE           | 4.87221   | 4.83349    | 5.42977   | 5.77842    | 5.58031    | 5.71716   |
| RPEL1         | 1.49964   | 1.61693    | 1.89562   | 2.4247     | 2.2806     | 2.68603   |
| RPF1          | 4.22423   | 4.29371    | 3.3749    | 3.89539    | 4.55157    | 5.19037   |
| RPF2          | 4.26707   | 4.45362    | 3.17699   | 3.57982    | 5.77592    | 6.19408   |
| RPF2P1        | 0.404107  | 0.887642   | 0.168     | 0.831091   | 2.08051    | 2.57017   |
| RPGR          | 2.18052   | 2.30204    | 1.68687   | 1.8454     | 1.90957    | 2.14505   |
| RPGRIP1L      | 3.39103   | 3.55813    | 4.3566    | 4.77152    | 4.42648    | 4.77003   |
| RPIA          | 2.99267   | 2.82718    | 1.74725   | 1.9191     | 2.79503    | 2.83245   |
| RPL10         | 7.13163   | 7.01035    | 6.49974   | 7.00441    | 7.75918    | 8.21368   |
| RPL10A        | 6.98899   | 6.95949    | 6.06864   | 6.52772    | 7.34888    | 7.94608   |
| RPL10AP2      | 1.91098   | 2.20097    | 1.25082   | 1.94294    | 2.49306    | 2.97023   |
| RPL10AP6      | 5.24553   | 5.20412    | 4.29327   | 4.78931    | 5.55811    | 6.34317   |
| RPL11         | 8.05327   | 7.93704    | 7.22434   | 7.60112    | 8.59921    | 8.91734   |
| RPL12         | 5.96237   | 5.93303    | 5.05669   | 5.60496    | 6.81121    | 7.52229   |
| RPL12P1       | 0.0253265 | -0.0193546 | -0.208589 | -0.484296  | 0.645794   | 0.827941  |
| RPL12P4       | 4.78803   | 4.72083    | 4.10816   | 4.49551    | 5.83069    | 6.36942   |
| RPL13         | 7.21987   | 7.14735    | 6.46042   | 6.83573    | 7.05186    | 7.86249   |
| RPL13A        | 7.13828   | 7.10632    | 6.25651   | 6.76167    | 8.22209    | 8.85933   |
| RPL13AP25     | 1.80026   | 2.03674    | 1.69983   | 2.12049    | 3.23242    | 2.71534   |

|                |           |            |            |           |          |          |
|----------------|-----------|------------|------------|-----------|----------|----------|
| RPL13AP5       | 8.17503   | 8.00057    | 7.76468    | 8.14319   | 9.20434  | 9.7923   |
| RPL13AP7       | 0.583163  | 0.637026   | -0.155724  | 0.69496   | 1.6418   | 1.52242  |
| RPL13P12       | 6.4817    | 6.41732    | 5.86685    | 6.27505   | 6.5366   | 7.18019  |
| RPL14          | 6.89963   | 6.91264    | 5.94813    | 6.43027   | 7.4175   | 7.89722  |
| RPL14P1        | 6.85716   | 6.80908    | 5.92184    | 6.39651   | 7.35909  | 7.77026  |
| RPL15          | 8.17582   | 8.03936    | 7.22388    | 7.58362   | 8.95861  | 9.49858  |
| RPL15P3        | 6.35943   | 6.22896    | 5.41387    | 5.85434   | 7.08163  | 7.78384  |
| RPL17          | 5.79383   | 5.72577    | 4.78168    | 5.23676   | 5.02408  | 5.85184  |
| RPL17-C18orf32 | 3.91903   | 4.11595    | 2.84971    | 3.39693   | 3.26728  | 4.40982  |
| RPL18          | 6.62639   | 6.43788    | 6.27565    | 6.77731   | 7.45841  | 8.04129  |
| RPL18A         | 5.16731   | 5.09189    | 4.40384    | 4.68023   | 5.6634   | 6.14199  |
| RPL18AP3       | 6.19322   | 5.94273    | 5.47361    | 5.90879   | 6.96923  | 7.64847  |
| RPL18P13       | 0.973406  | 0.792556   | -0.0748604 | 0.563939  | 1.15373  | 1.09503  |
| RPL19          | 8.51361   | 8.46886    | 7.83339    | 8.32232   | 8.84607  | 9.26546  |
| RPL21          | 3.70042   | 3.75567    | 3.505      | 3.93914   | 3.8182   | 4.44806  |
| RPL21P119      | 1.50573   | 1.50726    | 1.42342    | 1.96811   | 2.10526  | 2.07118  |
| RPL21P75       | 1.14075   | 2.59253    | 2.34614    | 2.36595   | 2.23739  | 2.75229  |
| RPL22          | 5.91932   | 5.8915     | 5.32564    | 5.55824   | 6.49692  | 6.98259  |
| RPL22L1        | 3.5524    | 3.60861    | 2.12028    | 2.57418   | 3.24658  | 4.71534  |
| RPL23          | 7.78799   | 7.73564    | 7.21536    | 7.60414   | 8.34055  | 9.18581  |
| RPL23A         | 5.91741   | 5.74877    | 5.53774    | 6.00426   | 6.56611  | 7.08734  |
| RPL23AP2       | 2.75003   | 2.8374     | 2.70232    | 3.139     | 3.45908  | 3.95249  |
| RPL23AP42      | 7.38227   | 7.32824    | 7.0752     | 7.51466   | 8.1443   | 8.58807  |
| RPL23AP65      | 2.75439   | 2.52776    | 2.22105    | 2.77641   | 3.31267  | 3.95134  |
| RPL23AP7       | 0.253336  | 0.705253   | 0.749817   | 0.90599   | 1.68869  | 1.91926  |
| RPL23AP74      | 0.923317  | 0.976921   | 0.992239   | 0.883285  | 1.35372  | 1.80049  |
| RPL23AP82      | 2.5492    | 2.62192    | 2.39077    | 2.64002   | 2.66116  | 3.16314  |
| RPL24          | 5.99073   | 5.92461    | 5.86657    | 6.19431   | 6.2374   | 7.09359  |
| RPL24P2        | 0.912236  | 0.792772   | 0.908567   | 1.38832   | 1.18672  | 1.89794  |
| RPL24P4        | 4.7042    | 4.75398    | 4.59941    | 5.09411   | 5.11039  | 5.74363  |
| RPL24P8        | 3.91856   | 3.8524     | 3.70843    | 4.15617   | 4.0793   | 5.10022  |
| RPL26          | 7.20795   | 7.09626    | 6.95646    | 7.38982   | 8.18485  | 8.96667  |
| RPL26L1        | 2.83619   | 2.81       | 3.00033    | 3.25909   | 1.86319  | 2.48264  |
| RPL26P19       | 5.34112   | 5.3363     | 5.20938    | 5.60953   | 6.40836  | 7.28403  |
| RPL26P30       | 2.03228   | 2.06626    | 2.32197    | 2.56456   | 1.37877  | 1.97347  |
| RPL27          | 6.59562   | 6.45411    | 6.25605    | 6.73422   | 7.48502  | 8.25206  |
| RPL27A         | 7.34717   | 7.27969    | 6.45629    | 6.84643   | 7.68833  | 8.24866  |
| RPL28          | 6.03108   | 5.78323    | 5.55545    | 5.91689   | 6.79709  | 7.13587  |
| RPL29          | 6.92919   | 6.66573    | 5.95438    | 6.20638   | 7.13678  | 7.96895  |
| RPL29P11       | 1.29805   | 1.24416    | 0.354373   | 1.26193   | 1.79471  | 2.90262  |
| RPL3           | 8.02951   | 7.87215    | 7.00247    | 7.37214   | 7.98849  | 8.26816  |
| RPL30          | 6.98282   | 7.00081    | 6.68306    | 7.20546   | 7.85685  | 8.78857  |
| RPL30P3        | -0.376978 | -0.253233  | -0.568612  | 0.120113  | 0.732078 | 1.40185  |
| RPL30P4        | 1.4816    | 1.59589    | 1.43909    | 1.93666   | 2.46061  | 3.50106  |
| RPL31          | 7.3161    | 7.25971    | 6.40209    | 6.78266   | 7.77263  | 8.97454  |
| RPL31P49       | 1.04504   | 1.29245    | 0.139469   | 0.91071   | 1.65597  | 2.71858  |
| RPL31P63       | 0.776449  | 1.02698    | 0.0858869  | 0.393054  | 1.37672  | 2.30734  |
| RPL32          | 7.47503   | 7.40289    | 6.52244    | 6.87327   | 8.07267  | 8.90936  |
| RPL32P3        | 2.61834   | 2.78746    | 3.25735    | 3.33205   | 2.78264  | 2.19417  |
| RPL34          | 6.27668   | 6.16264    | 5.82209    | 6.1043    | 6.59986  | 7.7211   |
| RPL34P18       | 3.00767   | 2.98554    | 2.70998    | 3.04571   | 3.40768  | 4.50416  |
| RPL34P27       | 0.0596183 | 0.00167256 | -0.537837  | -0.257399 | 0.434647 | 0.863153 |

|           |           |           |            |            |            |          |
|-----------|-----------|-----------|------------|------------|------------|----------|
| RPL34P33  | -0.186367 | -0.313108 | -0.762559  | -0.375403  | -0.0681914 | 1.04633  |
| RPL35     | 6.54419   | 6.4562    | 6.01587    | 6.36966    | 7.07001    | 8.19677  |
| RPL35A    | 6.31125   | 6.26759   | 6.35112    | 6.87964    | 7.65178    | 8.63675  |
| RPL35AP21 | -1.08408  | -0.555757 | -0.521987  | -0.201784  | 0.482012   | 1.17598  |
| RPL35P1   | 1.58531   | 1.43025   | 0.845743   | 1.40555    | 2.10967    | 3.27578  |
| RPL35P2   | 2.38695   | 2.53653   | 1.95239    | 2.31637    | 3.16305    | 3.7789   |
| RPL35P5   | 4.39806   | 4.47289   | 4.03192    | 4.32511    | 4.92544    | 5.96027  |
| RPL36     | 6.22749   | 6.09217   | 5.54048    | 5.97889    | 7.48874    | 8.16768  |
| RPL36A    | 3.2809    | 3.3348    | 3.04547    | 3.11972    | 4.06335    | 4.00195  |
| RPL36AL   | 5.58805   | 5.37792   | 4.16188    | 4.41277    | 5.95531    | 6.0002   |
| RPL37     | 7.42863   | 7.28769   | 7.15922    | 7.56632    | 8.30957    | 9.00757  |
| RPL37A    | 7.96916   | 7.86987   | 7.5096     | 7.99427    | 8.66408    | 9.35092  |
| RPL37AP1  | 2.30669   | 2.64264   | 2.27273    | 2.7611     | 3.41592    | 3.49098  |
| RPL37P2   | 1.66047   | 2.00508   | 1.77188    | 2.46638    | 2.92606    | 3.26762  |
| RPL37P23  | 4.12767   | 4.07002   | 4.03668    | 4.50486    | 5.14545    | 5.72766  |
| RPL37P6   | 1.6402    | 1.72495   | 1.4028     | 2.07867    | 2.54071    | 3.35511  |
| RPL38     | 6.20642   | 6.15735   | 5.79338    | 6.27567    | 7.51643    | 7.93981  |
| RPL38P4   | 0.183671  | 0.358419  | -0.161006  | 0.632724   | 1.68402    | 1.41227  |
| RPL39     | 5.7536    | 5.61237   | 5.48289    | 6.01043    | 6.71224    | 7.92151  |
| RPL39L    | -5.69162  | -5.45651  | -0.0336404 | 0.300838   | 0.909612   | 1.76092  |
| RPL39P3   | 3.89937   | 3.86837   | 3.78354    | 4.14661    | 4.93833    | 6.00889  |
| RPL3P2    | 2.57656   | 2.79632   | 1.62951    | 2.22998    | 2.73996    | 2.72103  |
| RPL3P4    | 6.68674   | 6.60845   | 5.77072    | 6.03284    | 6.72379    | 6.91302  |
| RPL3P6    | 0.840145  | 0.938572  | 1.65571    | 1.40691    | 0.698645   | 0.270672 |
| RPL3P7    | 2.22958   | 2.32922   | 1.32308    | 1.81795    | 2.3099     | 2.74064  |
| RPL4      | 8.91094   | 8.88779   | 8.04367    | 8.53302    | 9.20517    | 9.70035  |
| RPL41     | 8.82035   | 8.73243   | 7.73563    | 8.25884    | 9.03076    | 9.73352  |
| RPL41P2   | 0.0797843 | 0.364606  | -1.18873   | -0.0132134 | 0.24468    | 1.15896  |
| RPL4P3    | 1.04386   | 1.18651   | 0.276127   | 0.487404   | 1.31624    | 1.40828  |
| RPL4P4    | 7.19866   | 7.20495   | 6.37096    | 6.87606    | 7.52471    | 8.09854  |
| RPL4P5    | 4.65051   | 4.69668   | 3.81941    | 4.37914    | 4.99589    | 5.43     |
| RPL4P6    | 0.108397  | 0.013012  | 0.662041   | 0.659431   | -0.184426  | -1.31405 |
| RPL5      | 7.78773   | 7.625     | 7.22849    | 7.65032    | 8.1048     | 8.59448  |
| RPL5P1    | 3.35284   | 3.31785   | 2.67327    | 3.32915    | 3.63405    | 4.14004  |
| RPL5P17   | 1.5397    | 1.81426   | 1.10933    | 1.42263    | 1.80317    | 2.1569   |
| RPL5P23   | 1.95668   | 1.98549   | 1.54855    | 1.94862    | 2.32542    | 2.81733  |
| RPL5P29   | 0.218025  | 0.339103  | -0.391995  | 0.0408504  | 0.829119   | 0.499619 |
| RPL5P34   | 5.19475   | 5.06524   | 4.72183    | 5.16383    | 5.65911    | 5.98149  |
| RPL5P4    | 3.41579   | 3.45686   | 3.08835    | 3.34535    | 3.87081    | 4.12768  |
| RPL6      | 7.59063   | 7.45312   | 6.55783    | 6.8004     | 7.54189    | 7.84768  |
| RPL6P27   | 7.73078   | 7.52944   | 6.6423     | 7.01589    | 7.63679    | 8.19603  |
| RPL7      | 4.504     | 4.4931    | 4.08981    | 4.69756    | 5.26369    | 5.995    |
| RPL7A     | 6.95086   | 6.80979   | 6.32128    | 6.72836    | 7.18659    | 7.49542  |
| RPL7AP11  | 2.22579   | 1.95023   | 1.93764    | 2.05524    | 2.04931    | 2.38701  |
| RPL7AP30  | 4.92578   | 4.80788   | 4.2721     | 4.68686    | 5.31516    | 5.54496  |
| RPL7AP31  | 2.56511   | 2.46534   | 1.49078    | 1.9614     | 2.46718    | 2.50179  |
| RPL7AP6   | 7.11326   | 6.98323   | 6.456      | 6.9499     | 7.40242    | 7.7947   |
| RPL7AP66  | 2.23912   | 2.30817   | 1.64159    | 1.74722    | 2.09233    | 2.67742  |
| RPL7L1    | 6.5439    | 6.70129   | 5.9036     | 6.54362    | 7.36155    | 7.77341  |
| RPL7L1P8  | 0.999278  | 1.05834   | -0.0382848 | 1.04348    | 1.72677    | 1.84426  |
| RPL7P1    | 6.2196    | 6.15588   | 5.81354    | 6.38298    | 6.82101    | 7.9575   |
| RPL7P21   | 1.90998   | 2.01282   | 1.69486    | 2.14052    | 2.60603    | 3.01229  |

|             |            |              |            |           |          |         |
|-------------|------------|--------------|------------|-----------|----------|---------|
| RPL7P22     | 1.41973    | 1.76379      | 0.671167   | 1.59613   | 2.16123  | 2.59844 |
| RPL7P23     | -0.261281  | 0.191499     | -0.0520721 | 0.297896  | 0.628475 | 1.00249 |
| RPL7P9      | 7.59669    | 7.52235      | 7.27572    | 7.74436   | 8.28545  | 9.25565 |
| RPL8        | 7.68001    | 7.60245      | 7.35625    | 7.82252   | 8.62839  | 8.89334 |
| RPL9        | 4.43136    | 4.42574      | 2.77911    | 3.11481   | 3.92359  | 4.42499 |
| RPL9P7      | 3.33625    | 3.61422      | 2.95615    | 3.29261   | 4.18554  | 5.16561 |
| RPLP0       | 8.50543    | 8.44231      | 7.44093    | 7.87313   | 8.49081  | 9.18005 |
| RPLP0P6     | 8.03138    | 8.02755      | 6.99403    | 7.49599   | 8.16788  | 8.78735 |
| RPLP1       | 6.98857    | 6.66433      | 6.17672    | 6.4829    | 7.06583  | 7.61789 |
| RPLP2       | 7.17496    | 6.97895      | 6.5377     | 6.86364   | 6.72294  | 7.3019  |
| RPN1        | 7.19814    | 7.18317      | 7.36465    | 7.7696    | 7.01778  | 7.39222 |
| RPN2        | 8.63458    | 8.53953      | 8.12544    | 8.46577   | 7.33654  | 7.15643 |
| RPP14       | 4.52792    | 4.68562      | 3.65252    | 3.98128   | 4.70492  | 4.83728 |
| RPP21       | 1.9552     | 1.8212       | 1.14492    | 1.72407   | 2.70348  | 3.33219 |
| RPP25L      | 1.73557    | 1.49719      | 1.66826    | 2.08595   | 2.42451  | 3.28197 |
| RPP30       | 3.69752    | 3.80042      | 3.15633    | 3.56183   | 3.73201  | 4.15592 |
| RPP38       | 2.20425    | 2.30365      | 2.13995    | 2.46602   | 2.22323  | 2.57847 |
| RPP40       | 1.46083    | 1.79928      | 1.52387    | 2.1296    | 2.74271  | 3.71113 |
| RPPH1       | 11.0888    | 10.7731      | 11.2199    | 11.4596   | 11.4687  | 13.3141 |
| RPRD1A      | 5.05663    | 5.3107       | 4.59373    | 4.69368   | 5.02923  | 5.18885 |
| RPRD1B      | 4.85358    | 4.69326      | 4.42195    | 4.61058   | 3.96063  | 3.971   |
| RPRD2       | 4.60756    | 4.54136      | 4.40425    | 4.5278    | 4.44559  | 4.36875 |
| RPS10       | 4.99086    | 4.82894      | 4.3659     | 4.75968   | 5.78197  | 6.66112 |
| RPS10-NUDT3 | 0.679991   | 0.751301     | 0.766197   | 1.35555   | 2.76851  | 1.74771 |
| RPS11       | 7.70547    | 7.57334      | 7.22317    | 7.68281   | 8.35187  | 8.92697 |
| RPS11P5     | 4.86146    | 4.91258      | 4.3872     | 4.83204   | 5.60761  | 5.91472 |
| RPS12       | 5.87918    | 5.8215       | 5.28972    | 5.82913   | 6.99435  | 7.97205 |
| RPS12P23    | 0.151002   | 0.478785     | -0.102484  | 0.141027  | 1.32815  | 1.56766 |
| RPS13       | 6.9033     | 6.85904      | 6.03669    | 6.54381   | 7.04116  | 7.88335 |
| RPS13P2     | 5.12786    | 5.23801      | 4.51997    | 4.96119   | 5.30269  | 6.04306 |
| RPS14       | 7.24709    | 7.11911      | 7.25091    | 7.70651   | 8.03235  | 8.9667  |
| RPS15       | 5.57658    | 5.4184       | 4.83266    | 5.44577   | 6.5665   | 6.99196 |
| RPS15A      | 6.90902    | 6.75311      | 6.70922    | 7.07722   | 7.12335  | 8.06743 |
| RPS15AP1    | 2.0273     | 2.2207       | 1.99067    | 2.60544   | 2.39059  | 3.23965 |
| RPS15AP11   | 0.875269   | 0.807165     | 0.770897   | 1.28173   | 0.919355 | 1.89296 |
| RPS15AP12   | 1.22663    | 0.994109     | 0.976628   | 1.28719   | 1.6032   | 2.13055 |
| RPS15AP24   | 1.74305    | 1.81444      | 1.59342    | 2.1201    | 1.94606  | 2.86371 |
| RPS15AP38   | 2.98412    | 2.92997      | 3.05519    | 3.35555   | 3.42686  | 4.04124 |
| RPS16       | 6.18596    | 5.95867      | 5.81123    | 6.06643   | 6.96822  | 7.29291 |
| RPS17       | 8.19066    | 8.18108      | 7.47645    | 7.87172   | 8.61774  | 9.43081 |
| RPS18       | 7.43018    | 7.4095       | 6.76374    | 7.27118   | 8.5289   | 9.33579 |
| RPS18P12    | 0.52693    | 0.895194     | 0.237368   | 0.380829  | 1.64978  | 2.21685 |
| RPS18P9     | -0.0429175 | -0.000222192 | -0.453822  | 0.0686846 | 1.06055  | 1.0995  |
| RPS19       | 7.7066     | 7.54235      | 6.69551    | 7.04154   | 7.93099  | 8.63782 |
| RPS19BP1    | 4.65792    | 4.72636      | 3.83607    | 4.21423   | 4.45277  | 5.62026 |
| RPS19P1     | 3.16961    | 3.36205      | 2.53037    | 2.83854   | 3.83305  | 3.81798 |
| RPS19P3     | 1.06643    | 1.05166      | 0.141629   | 0.716122  | 1.75399  | 1.94362 |
| RPS2        | 7.40462    | 7.45544      | 7.19526    | 7.62051   | 8.24591  | 9.01669 |
| RPS20       | 7.24058    | 7.10666      | 7.23688    | 7.4863    | 7.57203  | 8.2971  |
| RPS20P10    | 1.57882    | 1.49108      | 1.43995    | 1.73075   | 2.01825  | 2.71734 |
| RPS20P14    | 3.56194    | 3.50948      | 3.6392     | 3.91012   | 4.43182  | 5.08206 |
| RPS21       | 6.9136     | 6.8141       | 5.24602    | 5.60842   | 7.05875  | 7.89892 |

|          |            |            |           |            |           |          |
|----------|------------|------------|-----------|------------|-----------|----------|
| RPS21P4  | 2.98997    | 3.20518    | 1.41196   | 1.93685    | 3.21004   | 3.74995  |
| RPS23    | 7.50857    | 7.39631    | 7.1132    | 7.593      | 8.31695   | 9.12052  |
| RPS23P8  | 5.96426    | 5.88868    | 5.63388   | 6.11245    | 6.69533   | 7.47798  |
| RPS24    | 7.40873    | 7.34408    | 6.89113   | 7.26575    | 8.26087   | 8.96335  |
| RPS24P8  | 2.16484    | 2.49547    | 2.18792   | 2.19023    | 3.20072   | 4.12223  |
| RPS25    | 6.74697    | 6.69434    | 6.20019   | 6.5322     | 6.86317   | 7.58039  |
| RPS26    | 2.95491    | 3.03932    | 2.34885   | 2.48229    | 2.79521   | 3.33508  |
| RPS27    | 3.35579    | 3.36636    | 2.46445   | 2.798      | 3.1584    | 4.26088  |
| RPS27A   | 7.28589    | 7.22487    | 6.55953   | 6.90697    | 7.5108    | 8.1806   |
| RPS27AP1 | 0.454534   | 0.59277    | -0.454461 | -0.0401527 | 0.200303  | 1.84282  |
| RPS27L   | 5.59583    | 5.9991     | 4.02837   | 4.48269    | 5.4007    | 6.05897  |
| RPS28    | 2.63673    | 2.44197    | 1.91092   | 2.33593    | 3.46384   | 3.90507  |
| RPS28P7  | 3.53906    | 3.26185    | 2.93085   | 3.27467    | 4.44805   | 4.81098  |
| RPS29    | 6.2244     | 6.03008    | 4.08458   | 4.52145    | 5.74118   | 7.09599  |
| RPS2P46  | 5.13524    | 5.12078    | 4.85466   | 5.35572    | 5.88153   | 6.81881  |
| RPS2P5   | 7.09633    | 7.14133    | 6.50904   | 6.96599    | 7.71931   | 8.37451  |
| RPS2P55  | 3.83066    | 3.95239    | 3.76034   | 4.12557    | 4.80472   | 5.52735  |
| RPS2P7   | -0.0810582 | -0.0275147 | -0.567423 | 0.00288251 | 1.05477   | 1.28383  |
| RPS3     | 8.34183    | 8.28876    | 7.57739   | 8.00929    | 7.65878   | 8.04792  |
| RPS3A    | 6.20088    | 6.17174    | 5.80926   | 6.19801    | 6.36292   | 7.63568  |
| RPS3AP26 | 6.05416    | 6.02149    | 5.59718   | 6.05017    | 6.22184   | 7.62278  |
| RPS3AP5  | 2.07318    | 2.23517    | 1.69948   | 2.26951    | 2.34631   | 3.99533  |
| RPS3AP6  | 7.33682    | 7.22659    | 6.87557   | 7.38573    | 7.5947    | 8.99867  |
| RPS4X    | 8.03485    | 7.87419    | 7.47596   | 7.78237    | 8.7808    | 9.07078  |
| RPS4XP1  | 1.1899     | 0.950244   | 0.794603  | 1.04857    | 1.87369   | 2.09069  |
| RPS4XP11 | 2.84488    | 2.79863    | 2.47366   | 2.77616    | 3.54143   | 3.99381  |
| RPS4XP13 | 0.460218   | 0.647462   | 0.178351  | 0.7564     | 1.37039   | 1.84142  |
| RPS4XP14 | 0.869319   | 0.604698   | 0.284147  | 0.456627   | 1.01972   | 1.37511  |
| RPS4XP16 | 0.0781999  | 0.434305   | 0.102819  | -0.0412137 | 1.05999   | 1.19937  |
| RPS4XP17 | 0.922441   | 0.999228   | 0.504824  | 0.80502    | 1.87869   | 1.83754  |
| RPS4XP2  | 0.597927   | 0.713071   | 0.684891  | 0.973442   | 1.57617   | 1.56993  |
| RPS4XP3  | 1.79414    | 1.79231    | 1.44745   | 1.88464    | 2.37403   | 2.74418  |
| RPS4XP6  | 2.17125    | 1.94085    | 1.73914   | 2.08094    | 2.67858   | 2.9134   |
| RPS4Y1   | ?          | -6.45019   | 5.74794   | 6.15646    | -6.64581  | ?        |
| RPS5     | 7.00743    | 6.84118    | 6.18183   | 6.67384    | 7.59585   | 8.52735  |
| RPS5P2   | 0.885949   | 0.850103   | 1.59787   | 1.38307    | -0.777433 | -2.00571 |
| RPS6     | 8.07978    | 7.9902     | 7.2598    | 7.65077    | 9.59555   | 10.1835  |
| RPS6KA1  | 5.10301    | 5.38616    | 3.5613    | 4.02431    | 3.94794   | 4.22992  |
| RPS6KA2  | 1.2317     | 0.929533   | 0.674533  | 1.53507    | -3.19956  | -4.70296 |
| RPS6KA3  | 6.40517    | 6.43458    | 5.36721   | 5.60067    | 5.0782    | 5.45378  |
| RPS6KA4  | 3.31494    | 3.18462    | 2.88526   | 3.21085    | 3.27633   | 3.23581  |
| RPS6KA5  | 3.53961    | 3.791      | 1.95028   | 1.91893    | 2.86887   | 2.95863  |
| RPS6KB1  | 5.24976    | 5.27719    | 5.17616   | 5.48914    | 6.05091   | 5.89262  |
| RPS6KB2  | 3.91194    | 3.59243    | 3.60927   | 3.75381    | 3.90384   | 4.03138  |
| RPS6KC1  | 5.06204    | 5.16878    | 4.53587   | 4.76768    | 5.69419   | 5.99804  |
| RPS6KL1  | 2.66944    | 2.51158    | -0.539469 | -0.616766  | 0.924716  | 0.702755 |
| RPS6P25  | -0.14695   | -0.104488  | -0.672391 | -0.616087  | 1.30456   | 1.34689  |
| RPS7     | 6.70318    | 6.65747    | 5.38423   | 5.78297    | 6.96818   | 7.93552  |
| RPS7P1   | 7.31105    | 7.2304     | 6.06606   | 6.47622    | 7.67233   | 8.7641   |
| RPS7P10  | 4.98007    | 4.84309    | 3.55768   | 4.00589    | 5.21327   | 6.41116  |
| RPS7P11  | 4.2299     | 4.19558    | 3.23068   | 3.45553    | 4.61854   | 5.74329  |
| RPS8     | 7.9312     | 7.88975    | 7.74672   | 8.15374    | 8.56567   | 9.17652  |

|            |          |          |           |           |            |          |
|------------|----------|----------|-----------|-----------|------------|----------|
| RPS9       | 6.59902  | 6.48583  | 5.93241   | 6.26742   | 7.11945    | 7.99746  |
| RPSA       | 7.53444  | 7.5182   | 6.49888   | 6.89579   | 7.88989    | 8.61974  |
| RPSAP15    | 3.67089  | 3.68138  | 2.64386   | 3.2454    | 4.1627     | 4.68146  |
| RPSAP52    | 2.41207  | 2.33483  | -0.539469 | -0.55404  | -0.0454657 | 0.224139 |
| RPSAP54    | 4.34543  | 4.3053   | 3.58597   | 3.69685   | 4.38326    | 4.8322   |
| RPSAP58    | 8.05199  | 7.98375  | 6.97801   | 7.42208   | 8.24357    | 9.0827   |
| RPTOR      | 4.97786  | 4.58096  | 4.79053   | 4.55417   | 4.62747    | 3.84753  |
| RPUSD1     | 2.96448  | 2.64569  | 2.44585   | 2.69853   | 2.89044    | 3.01781  |
| RPUSD2     | 2.9138   | 2.9013   | 2.08796   | 2.25751   | 1.83157    | 2.18205  |
| RPUSD3     | 4.47396  | 4.26336  | 3.68375   | 3.78447   | 4.36828    | 4.23139  |
| RPUSD4     | 3.96545  | 3.92493  | 3.698     | 3.99589   | 3.79324    | 3.73906  |
| RQCD1      | 5.4608   | 5.3959   | 5.25215   | 5.50771   | 5.65113    | 5.83967  |
| RRAGA      | 4.23166  | 4.16741  | 3.99763   | 4.42255   | 6.35666    | 6.4585   |
| RRAGB      | 1.69756  | 1.39518  | 2.32429   | 2.19497   | 2.6251     | 2.58792  |
| RRAGC      | 3.55761  | 3.47085  | 3.25787   | 3.68557   | 4.14544    | 4.42254  |
| RRAGD      | 3.83036  | 3.72698  | -4.59508  | -2.02079  | -2.75246   | -2.53597 |
| RRAS       | 1.93394  | 1.70711  | 2.30433   | 2.80706   | 1.85935    | 2.15129  |
| RRAS2      | 3.7974   | 3.75179  | 3.96142   | 4.46942   | 5.07172    | 5.21242  |
| RRBP1      | 7.65325  | 7.5807   | 7.95364   | 8.0547    | 7.09701    | 6.46634  |
| RREB1      | 4.61436  | 4.42818  | 4.70064   | 4.42255   | 4.17099    | 3.94074  |
| RRM1       | 6.7715   | 6.81939  | 6.33439   | 6.74483   | 6.10432    | 6.44428  |
| RRM2       | 6.27868  | 6.10036  | 5.69093   | 5.76863   | 6.40744    | 6.41848  |
| RRM2B      | 4.78674  | 5.05678  | 4.18933   | 4.54759   | 4.64345    | 4.99631  |
| RRM2P3     | 2.49702  | 2.63768  | 0.896497  | 0.98378   | 1.58256    | 1.28825  |
| RRN3       | 4.67388  | 4.82782  | 4.16148   | 4.68234   | 5.00773    | 5.28628  |
| RRN3P3     | 1.21798  | 1.20551  | 2.68801   | 2.66524   | 1.56363    | 0.725994 |
| RRNAD1     | 2.5896   | 2.48301  | 2.64268   | 2.90688   | 2.76015    | 2.62383  |
| RRP1       | 3.37238  | 3.30699  | 3.50472   | 3.79053   | 3.46897    | 3.2181   |
| RRP12      | 5.17449  | 5.19446  | 3.79005   | 4.28588   | 5.4948     | 5.46071  |
| RRP15      | 4.63798  | 4.80569  | 3.88121   | 4.10549   | 5.02487    | 4.74036  |
| RRP1B      | 4.9918   | 4.93057  | 5.14905   | 5.42255   | 5.07441    | 4.53288  |
| RRP36      | 4.67583  | 4.75755  | 4.22164   | 4.73254   | 5.69046    | 5.98582  |
| RRP7A      | 4.50717  | 4.32833  | 5.12449   | 5.37446   | 4.00025    | 4.00422  |
| RRP7BP     | 2.77447  | 2.75878  | 2.85078   | 2.9723    | 2.55789    | 1.95424  |
| RRP8       | 4.57004  | 4.62462  | 3.89862   | 4.09452   | 3.90764    | 3.85362  |
| RRP9       | 3.69216  | 3.50005  | 2.65569   | 3.17195   | 3.50081    | 3.95327  |
| RRS1       | 3.69752  | 3.71831  | 2.35565   | 2.98657   | 3.63545    | 3.61935  |
| RSAD1      | 4.66614  | 4.73191  | 3.36145   | 3.57066   | 3.94979    | 4.46821  |
| RSBN1      | 4.13696  | 4.16012  | 3.89595   | 4.03965   | 4.24957    | 4.16672  |
| RSBN1L     | 4.88728  | 4.6888   | 4.78658   | 4.70414   | 4.88849    | 4.56123  |
| RSC1A1     | 2.1079   | 2.36917  | 1.92486   | 2.04798   | 2.29775    | 2.66873  |
| RSF1       | 6.75926  | 6.61286  | 6.17734   | 6.12879   | 5.73902    | 5.56774  |
| RSL1D1     | 6.32534  | 6.3625   | 5.66547   | 6.11757   | 6.60059    | 6.74087  |
| RSL24D1    | 5.5128   | 5.4708   | 4.28978   | 4.90666   | 5.39996    | 6.25884  |
| RSL24D1P1  | 1.44859  | 1.58854  | 0.360387  | 0.942225  | 1.37408    | 2.45826  |
| RSL24D1P11 | 0.528041 | 0.593249 | -0.563714 | -0.486366 | 0.487208   | 1.12691  |
| RSPH3      | 1.06916  | 1.14454  | 2.65569   | 2.86272   | 3.08116    | 3.22402  |
| RSPH9      | 0.783608 | 0.477377 | 0.576571  | 0.58002   | 0.576319   | 0.16588  |
| RSPRY1     | 4.10908  | 4.23151  | 4.89862   | 5.13374   | 5.58435    | 5.62698  |
| RSRC1      | 4.16426  | 4.08845  | 4.63909   | 4.9838    | 5.45817    | 5.59234  |
| RSRC2      | 5.90777  | 5.83292  | 5.45264   | 5.50633   | 5.83554    | 5.60047  |
| RSRP1      | 4.93442  | 4.96175  | 5.06748   | 5.13693   | 6.17476    | 5.98949  |



|                 |            |          |           |            |           |           |
|-----------------|------------|----------|-----------|------------|-----------|-----------|
| RSU1            | 4.09045    | 4.3637   | 3.57802   | 4.36589    | 4.45668   | 5.11106   |
| RTCA            | 4.08063    | 3.8903   | 3.75458   | 4.12597    | 4.45797   | 4.45819   |
| RTCB            | 5.71507    | 5.75722  | 5.22904   | 5.80966    | 5.20347   | 5.62476   |
| RTTEL1          | 3.98711    | 3.65973  | 3.6992    | 3.80271    | 3.25335   | 2.54299   |
| RTTEL1-TNFRSF6B | 2.71722    | 2.48282  | 2.48803   | 2.67095    | 1.9612    | 1.51724   |
| RTTEL1P1        | -0.0252549 | 0.333229 | 0.906113  | 1.0038     | -0.174024 | -0.745912 |
| RTF1            | 4.97157    | 4.96079  | 4.74202   | 4.93077    | 4.90049   | 4.72791   |
| RTFDC1          | 5.61964    | 5.75388  | 5.06498   | 5.63222    | 5.93503   | 6.39354   |
| RTKN            | 4.1589     | 3.85455  | 3.0453    | 3.18119    | 2.87692   | 2.69417   |
| RTKN2           | 3.49814    | 3.53151  | 2.84715   | 2.74916    | 3.84252   | 3.76699   |
| RTN2            | 0.61388    | 0.331407 | 0.860939  | 0.698601   | 0.529601  | 0.816919  |
| RTN3            | 6.56133    | 6.63196  | 6.12987   | 6.33331    | 6.19335   | 6.22961   |
| RTN3P1          | 3.31217    | 3.426    | 2.97574   | 3.0995     | 2.92034   | 2.93591   |
| RTN4            | 6.53709    | 6.8038   | 6.95186   | 7.61596    | 7.11417   | 7.79759   |
| RTN4IP1         | 1.59991    | 1.64571  | 1.87179   | 2.23074    | 1.87109   | 2.11985   |
| RTP4            | -2.17488   | -1.76193 | 1.36341   | 1.55655    | -1.07506  | 0.176042  |
| RTTN            | 5.26743    | 5.21002  | 4.23749   | 4.37398    | 3.09291   | 2.83245   |
| RUFY1           | 3.44924    | 3.37714  | 4.12852   | 4.4133     | 4.45883   | 4.33745   |
| RUFY2           | 3.38348    | 3.6213   | 3.52941   | 3.62504    | 3.92116   | 4.06153   |
| RUFY3           | 3.28677    | 3.51984  | 4.2759    | 4.23989    | 4.5399    | 4.58782   |
| RUNDC1          | 3.50182    | 3.60054  | 3.44947   | 3.77076    | 4.3537    | 3.84018   |
| RUNDC3B         | 0.604783   | 0.137189 | 0.558032  | 0.591699   | -0.530833 | -1.006    |
| RUNX1           | 5.63127    | 5.65283  | 4.30129   | 4.49015    | 4.02443   | 3.31565   |
| RUNX1T1         | 1.62738    | 1.40138  | -5.1783   | -5.10387 ? | ?         |           |
| RUNX2           | 2.58864    | 2.55676  | 4.60356   | 4.76537    | 4.79964   | 4.36206   |
| RUSC1           | 3.68938    | 3.37163  | 3.07879   | 3.37642    | 4.21315   | 4.1568    |
| RUSC1-AS1       | 3.58992    | 3.69084  | 3.06427   | 3.14565    | 2.82164   | 2.7765    |
| RUSC2           | 3.16667    | 2.96133  | 3.43303   | 3.72564    | 3.88657   | 3.73416   |
| RUVBL1          | 4.95948    | 4.94566  | 4.6195    | 5.09736    | 4.71092   | 4.84113   |
| RUVBL2          | 4.9022     | 4.7319   | 4.73309   | 5.10973    | 5.80218   | 5.99025   |
| RWDD1           | 3.56051    | 3.64985  | 3.43253   | 3.81813    | 4.41507   | 5.23829   |
| RWDD2A          | 2.40422    | 2.45006  | 1.83887   | 1.95189    | 1.98357   | 1.92993   |
| RWDD2B          | 2.52563    | 2.62197  | 3.89462   | 4.28885    | 3.31841   | 3.84788   |
| RWDD3           | 2.69895    | 2.76137  | 2.73147   | 2.87423    | 2.60984   | 2.9433    |
| RWDD4           | 2.54774    | 2.7028   | 2.69062   | 3.17968    | 2.83944   | 3.33172   |
| RWDD4P1         | 0.747147   | 0.618474 | 0.947995  | 0.700422   | 0.201358  | -0.501884 |
| RWDD4P2         | 1.38356    | 1.66283  | 1.11633   | 1.44209    | 1.22706   | 2.15937   |
| RXRA            | 2.66725    | 2.40753  | 4.44675   | 4.80406    | 2.83755   | 2.96925   |
| RXRB            | 3.2531     | 3.19767  | 3.36541   | 3.53578    | 3.62299   | 3.76221   |
| RYBP            | 4.61436    | 4.58427  | 5.01553   | 5.32475    | 4.18752   | 3.8932    |
| RYK             | 5.33455    | 5.32159  | 5.31817   | 5.39219    | 5.03005   | 4.99689   |
| RYKP1           | 1.51704    | 1.6006   | 1.63208   | 1.96064    | 1.63957   | 1.17999   |
| RYR2            | 1.82842    | 1.80864  | -3.18222  | -3.30006   | -2.13612  | -2.38405  |
| RYR3            | -0.0407328 | 0.305445 | -1.13882  | -0.751045  | 3.23299   | 2.58792   |
| S100A1          | 1.19294    | 0.91173  | -0.173663 | -0.214791  | -1.20407  | -2.1163   |
| S100A10         | 5.17594    | 5.43882  | 5.40892   | 5.95023    | 5.52735   | 5.53287   |
| S100A11         | 4.99487    | 5.2131   | 5.47961   | 6.06045    | 5.04663   | 5.73004   |
| S100A13         | 4.71797    | 4.69438  | 3.3238    | 3.79412    | 4.28992   | 5.36633   |
| S100A16         | 5.66943    | 5.8686   | 2.76486   | 3.58987    | 6.16086   | 6.70981   |
| S100A2          | 1.04917    | 0.996642 | 0.816542  | 1.69856    | 1.76598   | 2.52212   |
| S100A3          | 1.53458    | 0.929533 | 1.08332   | 1.6921     | 0.362161  | 0.650921  |
| S100A4          | 2.26383    | 1.89912  | 5.13275   | 5.60328    | 2.82754   | 3.22698   |

|         |           |             |            |            |           |           |
|---------|-----------|-------------|------------|------------|-----------|-----------|
| S100A6  | 8.50795   | 8.72685     | 7.96266    | 8.79957    | 8.96093   | 10.0975   |
| S100B   | 4.61605   | 4.40055 ?   | ?          |            | 1.06084   | 1.35942   |
| S100PBP | 4.59855   | 4.54207     | 4.48627    | 4.44349    | 4.65766   | 4.59019   |
| S100Z   | -0.113974 | -0.354151 ? | ?          |            | 0.479334  | 0.0747657 |
| S1PR1   | -5.10914  | -4.13839    | 0.386425   | 0.999755   | 3.4754    | 4.05816   |
| S1PR2   | 4.25584   | 3.99658     | 2.06916    | 1.70499    | 1.9581    | 0.97985   |
| S1PR3   | 1.87414   | 1.76118     | 5.57076    | 5.8098     | 4.34954   | 4.11178   |
| S1PR5   | 1.12752   | 1.22371     | 2.13391    | 1.92462    | -0.705893 | -0.662104 |
| SAA1    | 3.4895    | 1.75798     | 3.18558    | 3.74297 ?  | ?         |           |
| SAA2    | 1.11957   | -1.63342    | 1.81804    | 2.89674 ?  | ?         |           |
| SAAL1   | 4.12189   | 4.24105     | 3.25319    | 3.64271    | 3.5196    | 3.83825   |
| SAC3D1  | 2.27822   | 1.98839     | 1.37111    | 1.25754    | 1.2586    | 1.38079   |
| SACM1L  | 4.94205   | 4.88256     | 4.6454     | 5.08899    | 4.54487   | 4.84307   |
| SACS    | 7.91862   | 8.21524     | 6.54139    | 7.07079    | 7.8455    | 8.19211   |
| SAE1    | 6.01534   | 6.02894     | 5.72561    | 6.09664    | 6.48415   | 6.80007   |
| SAFB    | 5.15447   | 5.12489     | 4.66981    | 4.74474    | 5.15831   | 4.62837   |
| SAFB2   | 4.31098   | 4.34455     | 4.04642    | 4.33894    | 4.9525    | 4.31184   |
| SALL1   | 3.86698   | 3.79219     | 3.31831    | 3.28991 ?  |           | -4.70296  |
| SAMD1   | 3.21382   | 2.88367     | 2.23012    | 2.31745    | 3.68399   | 3.2358    |
| SAMD10  | -0.413499 | -0.354149   | -1.229     | -0.860651  | 0.997957  | 1.12623   |
| SAMD11  | -2.16599  | -3.15088    | -0.95233   | -0.600125  | 1.93373   | 3.32305   |
| SAMD12  | 3.01345   | 3.13148     | 1.82206    | 1.65939    | 1.64347   | 2.17595   |
| SAMD15  | 0.62293   | 0.305445    | -0.0134653 | -0.0212303 | 1.06084   | 0.650921  |
| SAMD4A  | 5.00352   | 4.53715     | 3.66822    | 3.76307    | 5.10745   | 3.93172   |
| SAMD4B  | 4.08474   | 4.01895     | 4.21093    | 4.39797    | 4.29243   | 4.07955   |
| SAMD5   | 2.62734   | 2.87924     | -3.01245   | -4.52056   | 3.09621   | 3.86883   |
| SAMD8   | 4.75676   | 4.9439      | 4.72112    | 5.06921    | 5.45538   | 5.63811   |
| SAMD9   | 3.99615   | 4.17468     | 5.93541    | 6.42573    | 5.68506   | 6.61862   |
| SAMD9L  | 2.11792   | 2.77557     | 5.99762    | 6.41796    | 4.52021   | 4.94434   |
| SAMHD1  | 4.39903   | 4.4973      | 5.08231    | 5.41953    | 5.7117    | 5.48358   |
| SAMM50  | 4.50237   | 4.48893     | 4.23314    | 4.59668    | 3.8225    | 4.1759    |
| SAP130  | 4.09371   | 3.98528     | 3.81929    | 3.99708    | 3.75541   | 3.49786   |
| SAP18   | 4.68938   | 4.76919     | 4.60256    | 5.11218    | 4.98923   | 5.2605    |
| SAP30   | 2.928     | 2.9529      | 1.83887    | 2.45242    | 3.47283   | 3.61746   |
| SAP30BP | 4.46079   | 4.40443     | 4.52469    | 4.79203    | 5.56368   | 5.59591   |
| SAP30L  | 3.38174   | 3.51444     | 3.85265    | 4.1858     | 3.44035   | 3.6705    |
| SAPCD2  | 4.08848   | 4.09689     | 2.64403    | 2.83237    | 3.25682   | 3.56201   |
| SAR1A   | 5.87364   | 5.88009     | 6.18222    | 6.6658     | 6.6182    | 6.78614   |
| SAR1B   | 5.64207   | 5.93166     | 6.11161    | 6.59132    | 5.90864   | 6.10461   |
| SARAF   | 6.06327   | 6.22409     | 6.3979     | 6.82762    | 6.26541   | 6.50913   |
| SARM1   | 2.56493   | 2.61803     | 3.63078    | 3.86576    | 2.73577   | 2.72679   |
| SARNP   | 3.75266   | 3.74354     | 3.63214    | 3.86895    | 3.73849   | 4.36777   |
| SARS    | 5.41787   | 5.54453     | 5.7215     | 6.34828    | 6.16309   | 6.15629   |
| SARS2   | 2.54799   | 2.1973      | 1.86801    | 1.84433    | 2.37828   | 2.2729    |
| SART1   | 4.44367   | 4.36924     | 3.96113    | 4.10791    | 3.96357   | 3.42515   |
| SART3   | 5.74256   | 5.85851     | 5.0143     | 5.24155    | 5.19728   | 4.87259   |
| SASH1   | 4.86223   | 4.96498     | 3.56131    | 4.01141    | 4.87204   | 4.72477   |
| SASS6   | 4.23976   | 4.55466     | 3.81224    | 3.91769    | 4.1029    | 3.95684   |
| SAT1    | 4.4411    | 3.92516     | 6.07297    | 6.31085    | 5.19493   | 4.9135    |
| SAT2    | 3.01173   | 2.83178     | 3.60764    | 3.8219     | 3.71582   | 3.73207   |
| SATB1   | 3.51281   | 3.25483     | 1.23438    | 0.698601   | 3.11777   | 2.54596   |
| SATB2   | 4.10278   | 3.90161     | 2.92316    | 2.67251    | 2.88018   | 2.55694   |

|              |          |            |          |           |           |            |
|--------------|----------|------------|----------|-----------|-----------|------------|
| SAV1         | 3.96597  | 3.84193    | 2.33876  | 2.51809   | 3.379     | 3.20842    |
| SAYSD1       | 2.03904  | 2.23414    | 1.52387  | 2.03075   | 2.34813   | 2.48806    |
| SBDS         | 4.68583  | 4.67675    | 4.20299  | 4.81309   | 5.23121   | 5.64336    |
| SBDSP1       | 2.46979  | 2.39348    | 2.29485  | 2.94032   | 2.84771   | 3.25618    |
| SBF1         | 5.15307  | 4.90866    | 5.59142  | 5.86539   | 4.61081   | 4.57983    |
| SBF2         | 5.15267  | 5.26681    | 5.03497  | 5.02438   | 5.13672   | 5.13347    |
| SBF2-AS1     | 2.16288  | 2.03866    | 2.96935  | 2.58992   | 1.23087   | 1.11924    |
| SBNO1        | 6.68769  | 6.55321    | 5.68136  | 5.86046   | 6.25117   | 6.00229    |
| SBNO2        | 4.03731  | 3.64306    | 3.54609  | 3.86702   | 4.11117   | 4.0058     |
| SC22CB-1E7.1 | 3.90226  | 3.9259     | 3.21448  | 3.78208   | 4.31747   | 5.35309    |
| SC5D         | 4.73867  | 4.62858    | 4.28611  | 4.6864    | 3.96632   | 4.28763    |
| SCAF1        | 2.66725  | 2.39515    | 2.7909   | 2.87132   | 3.02619   | 3.26196    |
| SCAF11       | 6.79276  | 6.79927    | 6.38182  | 6.34214   | 6.05589   | 5.99502    |
| SCAF4        | 3.02203  | 2.87478    | 4.37489  | 4.10549   | 3.28221   | 2.86694    |
| SCAF8        | 5.23287  | 5.12901    | 5.23666  | 5.20391   | 5.69047   | 5.48728    |
| SCAI         | 3.40413  | 3.35603    | 3.64378  | 3.23432   | 3.52805   | 2.76193    |
| SCAMP1       | 4.55177  | 4.21487    | 4.9795   | 4.53863   | 5.41948   | 4.59935    |
| SCAMP1-AS1   | 0.255223 | 0.013012   | 0.996447 | 1.54942   | 1.06084   | 1.2122     |
| SCAMP2       | 3.91839  | 3.74051    | 4.04168  | 4.38301   | 4.28073   | 4.20617    |
| SCAMP3       | 5.21492  | 5.24279    | 4.47825  | 5.00099   | 5.7079    | 5.88807    |
| SCAMP4       | 3.86679  | 3.43476    | 3.6743   | 3.24809   | 4.05729   | 3.5725     |
| SCAMP5       | 3.2981   | 3.12962    | 1.25116  | 1.23107   | 0.0402612 | -0.0341529 |
| SCAND1       | 2.68367  | 2.25415    | 2.09721  | 2.25295   | 2.2161    | 3.16365    |
| SCAND2P      | 3.79719  | 3.92629    | 3.75217  | 3.91801   | 4.30241   | 3.487      |
| SCAP         | 5.38708  | 5.21442    | 5.00195  | 5.07044   | 5.11735   | 4.96038    |
| SCAPER       | 4.07075  | 4.01593    | 3.95347  | 3.89539   | 3.06079   | 2.80504    |
| SCARA3       | -1.99808 | -1.76193   | 3.28     | 3.64773   | 3.75226   | 3.28197    |
| SCARB1       | 7.17285  | 6.80988    | 4.62625  | 4.39202   | 5.63573   | 4.91258    |
| SCARB2       | 7.08377  | 6.55392    | 6.89397  | 7.04324   | 7.38671   | 6.97755    |
| SCARF2       | 1.64525  | 0.570657   | 2.41268  | 2.12001   | -1.45047  | -1.89883   |
| SCARNA10     | 7.33192  | 7.25793    | 7.34443  | 7.43431   | 6.45798   | 8.14532    |
| SCARNA12     | 5.88891  | 5.6814     | 4.66276  | 5.05554   | 4.85318   | 6.00026    |
| SCARNA13     | 5.32585  | 5.43686    | 4.23334  | 4.61254   | 4.39505   | 5.59348    |
| SCARNA15     | 2.94229  | 3.12489    | 2.16584  | 2.32093   | 2.65781   | 2.6422     |
| SCARNA16     | 2.07905  | 2.1973     | 1.42671  | 1.66737   | 2.20133   | 3.28501    |
| SCARNA2      | 4.96936  | 4.86525    | 4.48537  | 4.88976   | 4.00858   | 5.54829    |
| SCARNA21     | 0.577131 | 0.479758   | 1.27595  | 1.15801   | 0.740643  | 1.11352    |
| SCARNA22     | 1.44051  | 1.82258    | 2.01126  | 1.95189   | 2.36761   | 2.46823    |
| SCARNA5      | 5.88023  | 5.95421    | 5.45987  | 5.64521   | 5.04272   | 6.06435    |
| SCARNA6      | 4.69323  | 4.76356    | 4.29017  | 4.60541   | 3.80219   | 4.54831    |
| SCARNA7      | 5.64354  | 5.66997    | 5.51821  | 5.9974    | 5.83803   | 6.77431    |
| SCARNA9      | 3.15267  | 3.00476    | 3.92761  | 4.16146   | 2.8073    | 2.61523    |
| SCART1       | 0.399051 | -0.0533185 | 0.102    | -0.616766 | 0.661695  | -1.06257   |
| SCCPDH       | 5.2511   | 5.33197    | 3.22799  | 3.46293   | 4.05822   | 4.75271    |
| SCD          | 8.91784  | 8.89212    | 9.22308  | 9.52718   | 10.3144   | 10.6889    |
| SCD5         | 3.0186   | 2.85457    | 2.92239  | 2.98394   | 4.68343   | 4.66832    |
| SCDP1        | 3.13338  | 3.21077    | 3.47759  | 3.85869   | 4.6263    | 4.58024    |
| SCFD1        | 4.06993  | 4.32831    | 3.87852  | 4.14147   | 4.4926    | 5.33767    |
| SCFD2        | 3.52733  | 3.57058    | 3.56969  | 3.71294   | 3.96721   | 4.1419     |
| SCG2         | 4.30514  | 4.45601    | 3.7128   | 2.67582   | 4.66218   | 3.64864    |
| SCHIP1       | 2.15757  | 2.16413    | 2.73245  | 2.21509   | 4.39445   | 4.52922    |
| SCLT1        | 3.74342  | 3.57878    | 3.65863  | 3.50687   | 3.68418   | 3.77015    |

|            |           |          |           |           |            |           |
|------------|-----------|----------|-----------|-----------|------------|-----------|
| SCLY       | 3.96919   | 3.96383  | 2.78504   | 3.02804   | 3.75396    | 3.91286   |
| SCMH1      | 3.99857   | 4.00314  | 3.98266   | 4.15004   | 3.60688    | 3.63936   |
| SCML1      | 3.41076   | 2.89031  | 5.25681   | 5.01138   | 3.45184    | 2.56008   |
| SCML2      | 1.80079   | 1.75635  | -0.229171 | -0.249455 | 1.86805    | 1.39136   |
| SCN2A      | 2.02885   | 2.85378  | -2.59248  | -2.78325  | 0.107996   | 1.40185   |
| SCN3A      | -0.739418 | 0.418114 | 2.90884   | 2.52568   | -4.07293   | -1.28878  |
| SCN4B      | ?         | -6.45019 | 2.48182   | 2.35471   | -6.64581 ? |           |
| SCN8A      | 4.24269   | 4.24882  | 3.06203   | 3.14383   | 3.82954    | 3.60617   |
| SCN9A      | 1.07224   | 2.45133  | 0.661713  | 0.697169  | -1.20056   | -0.102834 |
| SCNM1      | 3.63869   | 3.68352  | 2.88923   | 3.35692   | 3.6706     | 3.74037   |
| SCNN1A     | -4.11163  | -5.45651 | 0.9329    | 0.825761  | 1.96909    | 1.40161   |
| SCO1       | 4.65791   | 4.56713  | 4.87515   | 5.06108   | 5.23828    | 5.33767   |
| SCO2       | 2.86634   | 2.62016  | 2.3204    | 2.8454    | 2.28569    | 2.9985    |
| SCOC       | 4.89386   | 4.80862  | 4.31532   | 4.6758    | 5.23301    | 5.51244   |
| SCP2       | 4.1406    | 4.25509  | 5.23703   | 5.61405   | 4.6503     | 5.46518   |
| SCPEP1     | 5.16972   | 5.18146  | 5.408     | 5.67621   | 4.74908    | 4.92537   |
| SCRG1      | 3.71982   | 3.19     | -0.375995 | -0.55404  | 2.65711    | 2.22404   |
| SCRIB      | 3.31075   | 3.12586  | 3.19369   | 3.18119   | 4.22156    | 4.59478   |
| SCRN1      | 7.28734   | 7.30914  | 6.81541   | 7.41755   | 7.27191    | 7.61351   |
| SCRN2      | 2.5055    | 2.23761  | 3.40144   | 3.57066   | 2.69064    | 2.84404   |
| SCRN3      | 3.25947   | 3.16104  | 3.62543   | 3.77229   | 3.80729    | 4.26051   |
| SCUBE1     | -6.68418  | -4.87366 | 3.43785   | 3.58972 ? | ?          |           |
| SCUBE3     | 2.42764   | 2.39825  | 2.49948   | 2.1152    | 7.76043    | 7.35295   |
| SCYL1      | 4.78581   | 4.44901  | 4.51004   | 4.89359   | 4.33396    | 4.07676   |
| SCYL2      | 5.08749   | 5.19096  | 4.98939   | 5.3093    | 5.4866     | 5.75641   |
| SCYL3      | 3.99293   | 4.02506  | 3.70593   | 3.82416   | 3.46155    | 3.61564   |
| SDAD1      | 4.719     | 4.80723  | 3.80388   | 4.38027   | 5.37025    | 5.77798   |
| SDAD1P1    | 0.874561  | 1.35813  | 0.650866  | 0.896373  | 1.86576    | 1.88999   |
| SDAD1P2    | 0.601877  | 1.1438   | 0.349433  | 0.665666  | 1.42399    | 1.59309   |
| SDC1       | 4.7444    | 4.53222  | 4.96871   | 5.13376   | 7.02447    | 7.5214    |
| SDC2       | 3.90084   | 3.76597  | 2.70218   | 2.11519   | 4.73789    | 4.36742   |
| SDC3       | 7.69449   | 7.72832  | 5.68335   | 5.81077   | 5.41817    | 4.96128   |
| SDC4       | 6.84043   | 6.89112  | 5.40986   | 6.12658   | 5.12063    | 5.11425   |
| SDCBP      | 5.04494   | 5.02287  | 6.22068   | 6.75437   | 5.42747    | 5.49479   |
| SDCBP2-AS1 | 2.7804    | 2.69704  | 3.66297   | 3.89947   | 1.7406     | 1.53173   |
| SDCBPP3    | 0.127686  | 0.297931 | 1.61917   | 2.06073   | 0.618483   | 0.675039  |
| SDCCAG3    | 4.19877   | 3.8404   | 3.06544   | 3.23632   | 4.6591     | 4.35605   |
| SDCCAG8    | 3.55917   | 3.71952  | 3.17507   | 3.41418   | 3.06445    | 3.56866   |
| SDE2       | 4.39235   | 4.39357  | 3.8277    | 4.20065   | 4.5685     | 4.23286   |
| SDF2       | 3.95823   | 4.034    | 4.22268   | 4.5305    | 5.09799    | 5.23286   |
| SDF2L1     | 3.61493   | 3.32994  | 2.03082   | 2.30904   | 1.78266    | 1.62424   |
| SDF4       | 5.40353   | 5.19759  | 5.38681   | 5.53682   | 5.66725    | 5.67536   |
| SDHA       | 5.52892   | 5.57635  | 5.76468   | 6.21557   | 5.4491     | 5.43167   |
| SDHAF1     | 1.88591   | 1.554    | 1.48185   | 1.60545   | 2.63662    | 3.20018   |
| SDHAF2     | 3.76738   | 3.82399  | 3.49155   | 3.88944   | 3.71225    | 4.06563   |
| SDHAF3     | 2.36702   | 2.40135  | 0.816542  | 0.935626  | -0.23389   | -0.183001 |
| SDHAF4     | 1.40425   | 1.24456  | 0.156448  | 0.698601  | 1.03324    | 1.86317   |
| SDHAP1     | 2.31652   | 2.19831  | 3.91404   | 4.04263   | 3.64008    | 3.10764   |
| SDHB       | 4.51523   | 4.53855  | 4.45581   | 5.09573   | 5.68955    | 6.3681    |
| SDHC       | 5.51982   | 5.61519  | 5.05952   | 5.2434    | 5.20253    | 5.57033   |
| SDHD       | 3.04663   | 3.20723  | 4.49209   | 4.9665    | 5.22455    | 6.03581   |
| SDK1       | 3.41855   | 3.21839  | 3.66354   | 3.52054   | 3.7816     | 3.41481   |

|            |            |           |          |           |          |            |
|------------|------------|-----------|----------|-----------|----------|------------|
| SDR39U1    | 1.70922    | 1.76545   | 1.10723  | 0.903023  | 1.97397  | 2.18698    |
| SEC11A     | 5.92963    | 5.71321   | 6.16185  | 6.24282   | 6.38402  | 6.67807    |
| SEC11B     | 2.19729    | 2.07148   | 2.69931  | 2.56139   | 2.66169  | 2.83631    |
| SEC11C     | 4.18585    | 4.15185   | 2.49245  | 3.11035   | 1.69287  | 2.70269    |
| SEC13      | 5.88587    | 5.85088   | 5.5264   | 6.22794   | 6.05005  | 6.35092    |
| SEC14L1    | 5.19484    | 5.11829   | 5.33042  | 5.61935   | 6.86856  | 6.54716    |
| SEC14L1P1  | 0.824548   | 0.877069  | 1.40981  | 1.485     | 1.90264  | 1.2356     |
| SEC14L2    | 4.20557    | 4.13874   | 3.46106  | 3.92896   | 3.59789  | 3.25306    |
| SEC16A     | 5.26537    | 5.10672   | 5.24061  | 5.2764    | 4.84249  | 4.82759    |
| SEC22A     | 3.09689    | 3.17376   | 3.05249  | 3.40885   | 3.24052  | 3.91167    |
| SEC22B     | 5.42238    | 5.46988   | 5.7776   | 6.18627   | 7.43287  | 7.81219    |
| SEC22C     | 5.38616    | 5.39899   | 4.78378  | 5.03004   | 5.56484  | 5.42056    |
| SEC23A     | 5.21793    | 5.8748    | 4.92624  | 5.9773    | 5.03011  | 6.13957    |
| SEC23B     | 5.84516    | 5.90373   | 4.88659  | 5.36588   | 5.65003  | 5.82611    |
| SEC23IP    | 5.33328    | 5.43575   | 5.04829  | 5.44815   | 6.2206   | 6.25762    |
| SEC24A     | 5.60946    | 5.38881   | 5.44493  | 5.57142   | 5.50522  | 5.25889    |
| SEC24B     | 4.64687    | 4.49569   | 4.70598  | 4.87202   | 4.58224  | 4.46196    |
| SEC24C     | 5.55369    | 5.61567   | 5.33776  | 5.79243   | 6.49941  | 6.39762    |
| SEC24D     | 4.41922    | 4.58222   | 5.12878  | 5.62035   | 4.50144  | 4.87823    |
| SEC31A     | 5.94245    | 6.00376   | 5.95833  | 6.39952   | 6.04134  | 6.12774    |
| SEC31B     | 1.09167    | 1.54648   | 2.0982   | 2.03746   | 2.87093  | 2.14433    |
| SEC61A1    | 7.39887    | 7.47609   | 7.29207  | 7.68805   | 7.58356  | 7.58245    |
| SEC61A2    | 2.79257    | 2.89917   | 2.19522  | 2.42552   | 2.13601  | 1.72827    |
| SEC61B     | 3.99005    | 3.92086   | 3.75754  | 4.25859   | 3.72662  | 4.42383    |
| SEC61G     | 4.07489    | 4.09939   | 4.31032  | 4.96929   | 4.63374  | 5.238      |
| SEC62      | 5.65157    | 5.57366   | 6.36602  | 6.53527   | 6.54239  | 6.34754    |
| SEC63      | 4.80209    | 4.70233   | 5.21427  | 5.24345   | 5.51509  | 5.36235    |
| SEC63P1    | 2.4834     | 2.34255   | 2.86717  | 2.8692    | 3.06383  | 2.95553    |
| SECISBP2   | 4.45889    | 4.42818   | 4.44583  | 4.46765   | 4.83703  | 4.87447    |
| SECISBP2L  | 5.64521    | 5.59444   | 5.27845  | 5.46812   | 5.29459  | 5.34381    |
| SECTM1     | 3.33297    | 3.19894   | 3.4729   | 3.68883 ? |          | -4.70296   |
| SEH1L      | 4.11369    | 4.18198   | 3.74353  | 4.11222   | 4.95598  | 5.26194    |
| SEL1L      | 6.20159    | 5.95156   | 5.48358  | 5.66141   | 6.0048   | 5.62027    |
| SEL1L3     | 3.78573    | 4.027     | 4.95986  | 5.67336   | 6.17375  | 6.5813     |
| SELENBP1   | -6.68418 ? |           | 2.48892  | 2.6157    | 0.652647 | -0.0918635 |
| SELK       | 4.37008    | 4.54035   | 2.94941  | 3.34603   | 3.80036  | 4.477      |
| SELL       | 0.649726   | 0.920918  | 0.138526 | 1.04098   | -4.65668 | -3.12051   |
| SELM       | 3.15423    | 2.87255   | 1.63029  | 1.94105   | -3.19956 | -3.38329   |
| SELO       | 2.71686    | 2.18387   | 2.69188  | 2.73333   | 2.89856  | 3.02063    |
| SELT       | 4.85865    | 4.81492   | 5.00634  | 5.3764    | 5.58966  | 6.0761     |
| SEMA3A     | 4.93754    | 4.69071   | 4.38348  | 4.59766   | 7.85626  | 8.04917    |
| SEMA3B     | 6.74721    | 6.69859   | 1.19157  | 1.81006   | 3.08621  | 1.46325    |
| SEMA3C     | 6.08166    | 6.16649   | 8.55328  | 8.49194   | 8.35132  | 8.51389    |
| SEMA3D     | 2.46835    | 2.29539 ? |          | -6.09892  | -3.48878 | -5.69922   |
| SEMA3F-AS1 | 1.33537    | 1.22891   | 1.73094  | 1.59069   | 1.84222  | 1.15031    |
| SEMA4B     | 3.76342    | 3.37163   | 4.08443  | 3.99314   | 4.89714  | 4.72894    |
| SEMA4C     | 4.60126    | 4.13427   | 4.31232  | 3.95861   | 4.14784  | 3.6705     |
| SEMA4D     | 2.04014    | 2.06074   | 3.99036  | 3.79213   | 1.73389  | 1.23011    |
| SEMA4F     | 4.25145    | 3.77676   | 3.16521  | 3.03073   | 3.04878  | 2.31567    |
| SEMA4G     | 1.33002    | 0.843775  | 1.28368  | 0.873404  | 0.518918 | -0.910808  |
| SEMA5A     | 2.49815    | 2.43199   | 5.7804   | 5.48169   | 1.02625  | 1.90802    |
| SEMA6A     | 3.86501    | 3.90954   | 0.574276 | 0.111499  | 2.0315   | 1.61439    |

|             |        |           |            |             |            |           |          |
|-------------|--------|-----------|------------|-------------|------------|-----------|----------|
| SEMA6B      |        | 1.19579   | -0.58      | 0.860939    | -0.0212303 | 3.74908   | 1.5971   |
| SEMA6D      |        | 1.03569   | 1.37009    | 4.00011     | 4.11034    | -6.64581  | -5.69922 |
| SEMA7A      |        | 2.13066   | 1.40138    | 2.25112     | 2.72407    | 5.17891   | 5.33359  |
| SENP1       |        | 4.60983   | 4.5115     | 4.28911     | 4.39094    | 3.81441   | 4.00529  |
| SENP2       |        | 4.12348   | 3.74783    | 4.74721     | 4.81597    | 5.50427   | 5.08036  |
| SENP3       |        | 4.96436   | 4.95855    | 4.61755     | 5.00307    | 5.49162   | 5.8481   |
| SENP5       |        | 5.41793   | 5.60455    | 5.71921     | 6.06827    | 6.59235   | 6.68878  |
| SENP6       |        | 5.87172   | 5.85173    | 5.25058     | 5.16088    | 5.89428   | 5.7781   |
| SENP7       |        | 3.46079   | 3.51586    | 4.22054     | 3.98788    | 3.31267   | 3.27057  |
| SENP8       |        | 0.520176  | 0.367136   | 1.13668     | 1.35398    | 0.525437  | 0.978357 |
|             | Sep 15 | 5.97246   | 5.94894    | 6.26663     | 6.65874    | 6.22406   | 6.76215  |
| SEPHS1      |        | 4.32907   | 4.33863    | 4.27413     | 4.45409    | 4.52885   | 4.36855  |
| SEPHS1P4    |        | 0.226262  | 0.351775   | 0.396423    | 0.349773   | 0.442259  | 0.293029 |
| SEPHS1P6    |        | 0.109053  | 0.0843501  | 0.065462    | 0.435607   | 0.535655  | 0.319525 |
| SEPHS2      |        | 4.36633   | 4.10606    | 4.02104     | 4.23102    | 3.90574   | 3.93714  |
| SEPN1       |        | 5.11798   | 4.92841    | 4.52843     | 4.19019    | 3.95575   | 3.83585  |
| SEPP1       |        | -4.05334  | -3.61983   | 2.50742     | 2.62678    | -5.65305  | -4.70296 |
| SEPSECS     |        | 2.84782   | 2.92733    | 2.32824     | 2.18582    | 3.17889   | 3.44304  |
| SEPSECS-AS1 |        | 0.159022  | 0.223769   | 0.545464    | 0.646135   | 1.00508   | 0.522196 |
|             | Sep 01 | 0.0884944 | -0.0118861 | 1.03517     | 1.00424    | -0.362544 | -1.28716 |
|             | Sep 10 | 4.81964   | 4.86734    | 4.97305     | 5.39946    | 3.91236   | 4.31047  |
| SEPT10P1    |        | 0.914733  | 1.11659    | 1.14037     | 1.72385    | 0.210401  | 0.396094 |
|             | Sep 11 | 6.42179   | 6.58869    | 5.69988     | 6.01399    | 6.16643   | 6.02883  |
|             | Sep 02 | 7.39052   | 7.39847    | 7.12055     | 7.47034    | 7.92097   | 8.1961   |
| SEPT2P1     |        | 1.18971   | 1.28539    | 1.06639     | 1.18756    | 1.48525   | 2.01441  |
|             | Sep 03 | -5.69162  | -5.45651   | 2.68685     | 3.21084    | -3.48878  | -2.8983  |
|             | Sep 04 | -0.547413 | -0.707737  | 2.88148     | 2.94552    | 3.1242    | 3.44358  |
|             | Sep 05 | 3.38702   | 2.98217    | 3.64934     | 3.66917    | -1.65987  | -2.70579 |
|             | Sep 06 | 1.24348   | 1.27867    | 4.03806     | 4.15796    | 1.39501   | 1.17598  |
|             | Sep 07 | 6.93522   | 7.07632    | 6.72185     | 7.13044    | 6.57392   | 7.04877  |
| SEPT7P2     |        | 3.24909   | 3.23715    | 3.01828     | 3.0799     | 1.9365    | 1.70397  |
| SEPT7P6     |        | 1.98405   | 2.42883    | 2.20748     | 2.39991    | 1.90107   | 2.26162  |
| SEPT7P7     |        | 0.165481  | 0.643367   | -0.00981478 | 0.852782   | 0.118027  | 0.849022 |
| SEPT7P8     |        | 0.146525  | 0.68698    | -0.00864596 | 0.266325   | 0.0717215 | 0.343908 |
|             | Sep 08 | 5.71888   | 5.43047    | 5.66132     | 5.74451    | 5.15711   | 4.78811  |
|             | Sep 09 | 8.11201   | 7.85365    | 6.14786     | 6.24662    | 7.27296   | 7.04585  |
| SEPW1       |        | 3.65627   | 3.40752    | 2.65254     | 3.02046    | 3.78574   | 4.25906  |
| SERAC1      |        | 2.6206    | 2.80629    | 2.29223     | 2.41082    | 4.8037    | 4.65742  |
| SERBP1      |        | 7.77357   | 7.82739    | 7.23505     | 7.61141    | 8.28362   | 8.08189  |
| SERBP1P1    |        | 4.71849   | 4.65524    | 4.02011     | 4.35593    | 5.0943    | 5.14827  |
| SERBP1P5    |        | 5.69009   | 5.70808    | 4.95616     | 5.38069    | 6.15632   | 6.00305  |
| SERBP1P6    |        | 3.86888   | 3.97347    | 3.28401     | 3.61454    | 4.34603   | 4.27902  |
| SERF1A      |        | 1.76357   | 2.04011    | 2.45472     | 2.7166     | 1.70345   | 1.68974  |
| SERF1B      |        | 2.6167    | 2.72259    | 3.2355      | 3.56775    | 2.87616   | 3.42652  |
| SERF2       |        | 6.60408   | 6.50119    | 5.93578     | 6.41227    | 7.05763   | 7.47942  |
| SERGEF      |        | 2.64523   | 2.55397    | 1.7294      | 2.11143    | 2.25259   | 2.43541  |
| SERINC1     |        | 5.46519   | 5.77674    | 5.95889     | 6.56469    | 7.07735   | 7.59905  |
| SERINC2     |        | 0.266817  | -0.292758  | 2.60438     | 2.60199    | -3.33694  | -2.24661 |
| SERINC3     |        | 6.92996   | 7.02032    | 7.01808     | 7.5046     | 7.00635   | 7.11142  |
| SERINC5     |        | 2.81211   | 3.70604    | 4.94611     | 5.75503    | 7.67779   | 8.30216  |
| SERP1       |        | 5.32502   | 5.35141    | 5.54147     | 6.00139    | 6.27861   | 6.61805  |
| SERPINA1    |        | -1.27248  | -0.93902   | 1.37876     | 2.08102 ?  |           | ?        |

|             |           |           |           |             |          |           |
|-------------|-----------|-----------|-----------|-------------|----------|-----------|
| SERPINA3    | 10.5928   | 10.5978   | -0.375995 | -0.55404    | 3.63661  | 1.90064   |
| SERPINA5    | 5.96646   | 6.01035   | -1.229    | -1.20162    | 2.10458  | 1.23585   |
| SERPINB1    | 1.52013   | 1.87703   | -2.72315  | -3.52222    | -3.85089 | -4.70296  |
| SERPINB2    | 0.520176  | 1.73686   | -1.79153  | -0.616766 ? | ?        |           |
| SERPINB5    | 5.06038   | 5.37516   | -4.18092  | -5.10387    | -4.65668 | -4.11926  |
| SERPINB6    | 4.1147    | 4.374     | 5.08561   | 5.71415     | 4.88658  | 5.35465   |
| SERPINB8    | 4.87847   | 5.00982   | 1.05494   | 2.43034     | 1.15992  | 1.95152   |
| SERPINE1    | 3.72509   | 4.29037   | 2.30031   | 3.5864      | 8.71597  | 9.47276   |
| SERPINE2    | 10.3605   | 9.40012   | 5.44719   | 6.09845     | 7.46518  | 6.96901   |
| SERPINH1    | 7.11689   | 6.84738   | 6.7158    | 6.79849     | 4.37997  | 4.27486   |
| SERTAD1     | 1.19579   | 1.60328   | 1.22592   | 1.83372     | 1.74486  | 2.80899   |
| SERTAD2     | 4.14797   | 4.13334   | 3.28205   | 3.5022      | 3.76909  | 3.22698   |
| SERTAD3     | 2.48543   | 2.42048   | 2.7721    | 3.1492      | 3.01941  | 3.24259   |
| SERTAD4     | 6.17452   | 6.16925   | 2.37491   | 2.62928     | 1.97271  | 2.34315   |
| SERTAD4-AS1 | 1.59558   | 1.74664   | -0.861345 | -1.20162    | -1.65987 | -0.848487 |
| SESN1       | 1.87832   | 2.07035   | 1.50756   | 1.33124     | 3.11665  | 2.95779   |
| SESN2       | 2.26094   | 1.98426   | 1.8609    | 2.62928     | 2.56611  | 2.15749   |
| SESN3       | 2.6911    | 2.50871   | 1.43123   | 1.14862     | 5.89523  | 5.6152    |
| SESTD1      | 4.03139   | 4.25825   | 5.48358   | 5.41228     | 5.19921  | 5.49724   |
| SET         | 7.30465   | 7.67057   | 6.61773   | 7.21906     | 7.40899  | 7.81934   |
| SETBP1      | 3.97951   | 3.7969    | 2.57804   | 2.14386     | 3.52951  | 3.23873   |
| SETD1A      | 2.47012   | 2.09529   | 2.75558   | 2.74232     | 2.52458  | 1.73475   |
| SETD1B      | 2.85552   | 2.61398   | 2.84163   | 2.78296     | 2.56128  | 2.63759   |
| SETD2       | 6.48994   | 6.37872   | 6.47353   | 6.37625     | 6.5484   | 6.32152   |
| SETD3       | 4.91378   | 4.9187    | 4.20449   | 4.63431     | 4.46832  | 4.6152    |
| SETD4       | 2.60927   | 2.72204   | 3.45491   | 3.4928      | 3.03318  | 2.78915   |
| SETD5       | 6.35245   | 6.22998   | 6.26768   | 6.26104     | 6.38356  | 5.82856   |
| SETD6       | 3.79459   | 3.97677   | 3.28727   | 3.37432     | 4.6141   | 4.36063   |
| SETD7       | 5.81808   | 5.89634   | 5.88189   | 6.41448     | 5.56338  | 5.82953   |
| SETD8       | 4.55921   | 4.37556   | 4.0994    | 4.18634     | 4.52668  | 3.73449   |
| SETD9       | -0.517761 | -0.258259 | 0.105584  | 0.68322     | 1.19526  | 2.17921   |
| SETDB1      | 4.73006   | 4.69374   | 4.35262   | 4.38099     | 4.71449  | 4.51928   |
| SETDB2      | 2.46081   | 2.58429   | 3.61737   | 3.75999     | 2.41117  | 2.84404   |
| SETMAR      | 3.15579   | 2.87255   | 2.34006   | 2.2878      | 2.53692  | 2.65962   |
| SETP14      | 5.06092   | 5.49379   | 4.44442   | 5.01115     | 5.09186  | 5.62404   |
| SETX        | 7.04397   | 7.04779   | 6.71447   | 6.77746     | 6.70786  | 6.75475   |
| SEZ6L2      | 3.43149   | 3.12024   | 3.35369   | 2.85408     | -1.70566 | -2.24661  |
| SF1         | 5.49289   | 5.29287   | 5.15465   | 5.18118     | 5.00635  | 4.85553   |
| SF3A1       | 5.63684   | 5.68275   | 4.86901   | 5.03132     | 4.92178  | 4.98146   |
| SF3A2       | 2.41697   | 2.19181   | 1.95405   | 2.0561      | 2.48868  | 2.52212   |
| SF3A3       | 6.25108   | 6.41221   | 5.21192   | 5.67565     | 6.10025  | 6.20271   |
| SF3A3P1     | 2.33035   | 2.63992   | 1.69739   | 1.86251     | 1.95021  | 2.09118   |
| SF3A3P2     | 2.59239   | 2.98988   | 1.51304   | 2.03284     | 2.47901  | 2.26316   |
| SF3B1       | 7.78376   | 7.78617   | 7.30054   | 7.56039     | 8.0994   | 8.16478   |
| SF3B2       | 7.26964   | 7.29758   | 6.33922   | 6.66993     | 6.41411  | 6.31286   |
| SF3B3       | 7.12338   | 7.11034   | 7.23751   | 7.55785     | 7.79257  | 7.56737   |
| SF3B4       | 4.57411   | 4.55882   | 3.69911   | 4.12111     | 4.05395  | 4.26483   |
| SF3B5       | 3.97688   | 3.83406   | 3.64936   | 3.85262     | 5.18869  | 5.81782   |
| SF3B6       | 4.7547    | 5.11735   | 3.6729    | 4.2553      | 5.672    | 6.94052   |
| SF11        | 3.25221   | 3.28367   | 3.41453   | 3.49298     | 2.63432  | 2.21812   |
| SFMBT1      | 3.70293   | 3.95447   | 3.48507   | 3.77839     | 3.84903  | 4.06642   |
| SFMBT2      | -3.8896   | -6.45019  | 0.711372  | 0.520618    | 2.9979   | 2.49787   |

|            |           |           |          |           |           |           |
|------------|-----------|-----------|----------|-----------|-----------|-----------|
| SFPQ       | 7.74966   | 7.79924   | 7.38189  | 7.44223   | 7.54066   | 7.37759   |
| SFR1       | 0.994464  | 1.42593   | 1.30837  | 1.64609   | 1.40043   | 1.97981   |
| SFRP1      | 4.74798   | 4.87196   | 2.85814  | 3.97863   | 4.79346   | 5.33562   |
| SFSWAP     | 5.17473   | 5.19715   | 4.50384  | 4.55472   | 4.5882    | 4.22992   |
| SFT2D1     | 3.2782    | 3.33158   | 2.91451  | 3.15796   | 4.0676    | 4.31704   |
| SFT2D2     | 7.44936   | 7.56842   | 6.3947   | 6.74697   | 7.20283   | 7.22432   |
| SFXN1      | 5.72271   | 5.73282   | 6.14935  | 6.4448    | 6.70475   | 6.59534   |
| SFXN2      | 2.98392   | 2.78271   | 2.53759  | 2.58815   | 3.02094   | 2.72792   |
| SFXN3      | 4.70018   | 4.67286   | 3.84023  | 4.393     | 4.69834   | 4.76089   |
| SFXN4      | 2.58864   | 2.48845   | 1.81651  | 2.19497   | 3.36206   | 3.7383    |
| SFXN5      | 3.95197   | 4.12118   | 3.88256  | 4.15444   | 4.98175   | 4.84884   |
| SGCB       | 4.62902   | 4.80686   | 4.21949  | 4.75148   | 4.73629   | 5.24965   |
| SGCE       | 4.99091   | 4.74965   | 4.83189  | 5.241     | 5.65058   | 6.09982   |
| SGK1       | 4.09939   | 3.6703    | 3.57304  | 3.82338   | 5.00414   | 5.09983   |
| SGK223     | -0.289526 | -0.333394 | 3.44946  | 2.69209   | 1.51465   | 1.06153   |
| SGK3       | 2.51417   | 2.52539   | 0.327503 | 0.806901  | 1.83787   | 1.84602   |
| SGK494     | 1.74722   | 1.75719   | 2.25364  | 2.12524   | 1.65434   | 0.622499  |
| SGMS1      | 3.93573   | 3.95184   | 3.19802  | 3.59853   | 3.22233   | 3.22993   |
| SGMS1-AS1  | 0.833821  | 0.720427  | 1.24194  | 1.23577   | -0.538103 | -0.311564 |
| SGMS2      | 2.0668    | 3.23701   | 2.86323  | 3.74786   | 3.00334   | 3.63136   |
| SGOL1      | 3.75558   | 3.81123   | 3.33498  | 3.47532   | 3.47852   | 3.53608   |
| SGOL2      | 5.12109   | 5.35772   | 4.55033  | 4.8219    | 5.23411   | 5.81929   |
| SGPL1      | 4.59553   | 5.14955   | 4.08326  | 4.62249   | 4.76647   | 5.21065   |
| SGPP1      | 3.51888   | 3.36529   | 3.19802  | 3.38102   | 3.48817   | 3.01439   |
| SGPP2      | -0.470075 | -0.312932 | 0.225978 | 0.605504  | 0.688494  | 0.100762  |
| SGSH       | 4.19498   | 3.83865   | 4.7772   | 4.87558   | 3.99253   | 4.00753   |
| SGSM2      | 3.90006   | 3.82022   | 4.57251  | 4.55182   | 5.08631   | 4.64919   |
| SGSM3      | 4.10422   | 3.67932   | 4.00509  | 4.07605   | 3.51667   | 3.15438   |
| SGTA       | 4.46269   | 4.10034   | 3.90792  | 4.12238   | 5.1702    | 5.16211   |
| SGTB       | 3.55402   | 3.64631   | 3.88759  | 4.32635   | 3.73962   | 3.68975   |
| SH2B1      | 3.73123   | 3.53716   | 4.04409  | 4.14973   | 4.0777    | 3.68741   |
| SH2B3      | 6.85816   | 7.48541   | 4.77211  | 5.25803   | 4.66667   | 4.768     |
| SH2D4A     | -1.20691  | -1.41808  | 3.7398   | 3.93147   | 2.84749   | 2.85935   |
| SH2D5      | 0.631914  | 0.107125  | 0.636738 | 1.25754   | 0.448309  | 0.126299  |
| SH3BGRL    | 3.86029   | 4.08598   | 4.68606  | 5.11457   | 4.58997   | 4.96658   |
| SH3BGRL2   | 2.91564   | 3.09558   | -1.05395 | -0.860651 | 3.29969   | 3.42514   |
| SH3BGRL3   | 4.74776   | 4.62426   | 4.16212  | 4.67887   | 5.05825   | 5.32943   |
| SH3BP1     | 2.7916    | 2.35754   | 3.13665  | 3.35041   | 1.78045   | 1.85636   |
| SH3BP2     | 2.90084   | 2.68691   | 5.80905  | 5.6864    | 6.30801   | 5.12221   |
| SH3BP4     | 6.04533   | 5.90511   | 5.40286  | 5.65645   | 6.63775   | 6.46509   |
| SH3BP5     | 2.67552   | 3.11093   | 2.58377  | 2.83847   | 4.68737   | 4.37152   |
| SH3BP5-AS1 | 3.442     | 3.43339   | 3.1002   | 2.9393    | 3.50697   | 2.73596   |
| SH3BP5L    | 4.2123    | 4.11268   | 3.73086  | 4.10183   | 4.59826   | 4.68988   |
| SH3D19     | 5.25881   | 5.1477    | 4.00063  | 4.184     | 4.82327   | 5.31587   |
| SH3D21     | 1.01831   | 0.391262  | 1.26424  | 1.36745   | 3.13648   | 1.49167   |
| SH3GL1     | 4.59972   | 3.98687   | 3.99334  | 3.94201   | 5.0141    | 4.49165   |
| SH3GLB1    | 5.43694   | 5.48478   | 5.65052  | 5.87522   | 5.86544   | 6.13169   |
| SH3GLB2    | 3.65957   | 3.6299    | 3.7113   | 3.79052   | 4.49514   | 4.45944   |
| SH3KBP1    | 5.62594   | 5.77554   | 4.64698  | 5.36942   | 4.14865   | 4.29046   |
| SH3PXD2A   | 6.65118   | 6.67111   | 4.20664  | 4.37398   | 3.89331   | 4.08281   |
| SH3PXD2B   | 4.5892    | 4.27862   | 4.93217  | 4.89609   | 6.33985   | 5.81537   |
| SH3RF1     | 3.85839   | 3.86918   | 2.87447  | 3.0586    | 3.69834   | 3.45315   |



|         |            |          |           |          |            |             |
|---------|------------|----------|-----------|----------|------------|-------------|
| SH3RF2  | 1.69327    | 1.93378  | 3.75164   | 4.11276  | 1.69727    | 1.75275     |
| SH3RF3  | -5.69162 ? |          | -0.825729 | 0.120113 | 2.13087    | 1.82469     |
| SH3TC1  | 0.878411   | 0.736899 | 2.15634   | 2.02562  | -4.07293   | -3.12051    |
| SH3TC2  | 5.38172    | 5.94996  | 3.35369   | 4.16729  | 1.55404    | 2.32121     |
| SH3YL1  | 2.60243    | 2.63256  | 2.77938   | 2.43808  | 3.42317    | 2.6899      |
| SHARPIN | 2.21083    | 2.1146   | 3.0501    | 3.36691  | 2.81137    | 3.01439     |
| SHB     | 2.63826    | 2.78271  | 2.53073   | 3.2131   | 4.97344    | 4.63092     |
| SHC1    | 6.69763    | 6.53821  | 6.86027   | 6.99704  | 7.22812    | 7.38014     |
| SHC1P2  | 0.0155547  | 0.109227 | 0.0655447 | 0.725427 | 0.956138   | 0.126973    |
| SHC3    | 0.752201   | 0.775632 | 0.793829  | 0.749225 | 1.05399    | 0.650921    |
| SHC4    | 3.06747    | 3.086    | 1.5647    | 1.81602  | 1.37866    | 1.34863     |
| SHCBP1  | 4.86173    | 5.0768   | 4.85539   | 5.38002  | 5.96723    | 5.98284     |
| SHFM1   | 5.61327    | 5.55055  | 5.63301   | 5.86379  | 5.35752    | 5.75423     |
| SHFM1P1 | 0.0667987  | 0.36727  | 0.504386  | 0.28359  | 0.0946955  | -0.00614162 |
| SHISA2  | -6.68418   | -4.87366 | 4.47825   | 4.81375  | 1.17894    | 0.922708    |
| SHISA4  | 2.72719    | 2.80862  | 1.79379   | 2.53143  | 3.08116    | 3.37011     |
| SHISA5  | 5.63909    | 5.57469  | 5.20394   | 5.32684  | 6.39853    | 6.20468     |
| SHKBP1  | 3.00828    | 2.86584  | 2.78227   | 3.20179  | 3.21314    | 3.56007     |
| SHMT1   | 4.34985    | 4.31949  | 3.82543   | 4.08941  | 4.71033    | 4.85246     |
| SHMT2   | 5.2264     | 5.23992  | 5.69618   | 6.32401  | 5.97602    | 5.98455     |
| SHOC2   | 4.74024    | 4.73804  | 4.55541   | 4.83734  | 5.068      | 5.30453     |
| SHOX2   | 3.02544    | 2.7742   | 3.70598   | 3.50238  | 3.99391    | 3.61746     |
| SHPK    | 3.58424    | 3.43209  | 3.99652   | 4.221    | 3.93744    | 3.88541     |
| SHPRH   | 5.01663    | 5.13702  | 5.34859   | 5.30327  | 5.56227    | 5.20994     |
| SHQ1    | 4.1409     | 4.00067  | 3.68838   | 3.8582   | 4.09457    | 3.85743     |
| SHROOM1 | 2.55596    | 2.31853  | 3.25111   | 3.5689   | 1.51465    | 1.29333     |
| SHROOM2 | 4.26959    | 4.19625  | -0.206091 | 0.120113 | -5.65305   | -3.70484    |
| SHROOM3 | 3.87741    | 3.97594  | 2.35177   | 2.38304  | 4.81946    | 4.69629     |
| SHROOM4 | 5.99227    | 6.10604  | 1.0162    | 1.03078  | 2.73202    | 2.677       |
| SHTN1   | 4.90408    | 5.15231  | 4.38633   | 4.39399  | 5.6184     | 5.43175     |
| SIAE    | 2.2245     | 2.25238  | 3.66194   | 3.75278  | 1.7024     | 1.50513     |
| SIAH1   | 2.98845    | 3.08138  | 3.71915   | 3.64811  | 4.11652    | 3.63635     |
| SIAH2   | 3.03537    | 2.83866  | 3.0477    | 3.12461  | 4.19748    | 3.96394     |
| SIDT2   | 2.88777    | 2.82256  | 4.04409   | 3.90099  | 3.00147    | 2.77711     |
| SIGIRR  | 2.24052    | 1.8681   | -2.27595  | -2.52305 | -5.65305 ? |             |
| SIGMAR1 | 5.17588    | 5.13149  | 4.65566   | 4.96127  | 5.09204    | 5.04648     |
| SIK2    | 3.45406    | 3.38842  | 4.89988   | 5.05853  | 5.0142     | 4.83234     |
| SIK3    | 3.52733    | 3.24452  | 3.74426   | 3.78447  | 4.38271    | 3.85743     |
| SIKE1   | 4.87927    | 5.28239  | 4.62142   | 5.22711  | 6.0801     | 6.74988     |
| SIL1    | 3.87444    | 3.59912  | 4.28386   | 4.51854  | 3.47905    | 3.89516     |
| SIM2    | -1.45077   | -1.17713 | 2.56468   | 2.59854  | -2.01588   | -2.38405    |
| SIMC1   | 1.27867    | 1.25908  | 3.56627   | 3.58799  | -1.45047   | -2.8983     |
| SIN3A   | 5.38253    | 5.43474  | 5.56042   | 5.61499  | 5.06432    | 4.8603      |
| SIN3B   | 3.89617    | 3.56506  | 3.85127   | 3.83075  | 4.6012     | 4.07136     |
| SIPA1   | 3.75829    | 3.513    | 2.26358   | 2.60886  | 1.6435     | 1.65964     |
| SIPA1L1 | 4.28248    | 4.11929  | 4.42933   | 4.68558  | 5.47411    | 5.35734     |
| SIPA1L2 | 5.46108    | 5.3453   | 6.94186   | 6.88677  | 5.60619    | 5.47629     |
| SIPA1L3 | 2.68247    | 2.51158  | 3.08794   | 2.86559  | 3.8235     | 3.24166     |
| SIRPA   | 3.66271    | 3.33558  | 3.40652   | 3.4992   | 1.41349    | 1.27061     |
| SIRT1   | 3.52612    | 3.45154  | 2.92761   | 3.1881   | 3.65823    | 3.88199     |
| SIRT2   | 3.13064    | 3.025    | 3.39957   | 3.71295  | 4.42913    | 4.58098     |
| SIRT3   | 2.43978    | 2.47169  | 3.05998   | 3.21278  | 2.20699    | 1.77713     |

|             |          |          |           |          |            |           |
|-------------|----------|----------|-----------|----------|------------|-----------|
| SIRT5       | 1.18871  | 1.5593   | 1.67449   | 2.06112  | 2.01486    | 2.43796   |
| SIRT6       | 1.43024  | 1.07637  | 0.882635  | 1.17662  | 1.65713    | 2.27058   |
| SIRT7       | 3.88305  | 3.5938   | 3.80516   | 4.1067   | 4.83002    | 4.96747   |
| SIVA1       | 4.15423  | 3.75268  | 3.0501    | 3.11034  | 2.88273    | 3.9135    |
| SIX1        | 3.31495  | 3.51444  | 3.49771   | 3.66596  | 1.90957    | 2.14505   |
| SIX4        | 4.07652  | 3.96446  | 3.92107   | 3.84973  | 3.67731    | 3.15748   |
| SIX5        | 1.02487  | 0.6168   | 0.817713  | 1.0163   | 0.848782   | 1.19618   |
| SKA1        | 4.03562  | 4.21575  | 2.75018   | 3.42677  | 2.59944    | 2.70269   |
| SKA2        | 5.51043  | 5.3918   | 4.68424   | 5.08706  | 6.25036    | 6.27073   |
| SKA2P1      | 1.31659  | 1.33506  | 0.775017  | 0.763454 | 2.43479    | 2.9462    |
| SKA3        | 3.98039  | 4.1296   | 3.16077   | 3.54042  | 3.37723    | 3.57405   |
| SKAP2       | 3.52973  | 3.74294  | 2.5273    | 2.96532  | 3.78986    | 4.18961   |
| SKI         | 3.63631  | 3.57607  | 3.36915   | 3.27919  | 3.7169     | 3.69629   |
| SKIDA1      | 0.987481 | 1.2583   | -0.276471 | -1.06415 | 3.34812    | 3.75066   |
| SKIL        | 5.35892  | 5.59784  | 5.33856   | 5.26944  | 5.95506    | 5.70212   |
| SKIV2L      | 4.43084  | 4.36608  | 4.43026   | 4.86702  | 5.34635    | 5.34721   |
| SKIV2L2     | 5.54037  | 5.67504  | 5.77366   | 6.01407  | 5.95607    | 6.37741   |
| SKP1        | 6.49121  | 6.5363   | 6.86645   | 7.23208  | 6.76748    | 7.26592   |
| SKP1P1      | 2.9303   | 3.13957  | 3.35397   | 3.7578   | 3.29415    | 3.83433   |
| SKP2        | 4.76749  | 5.00169  | 5.23275   | 5.52644  | 5.02312    | 5.33288   |
| SLAIN1      | 4.40486  | 4.2845   | -5.1783   | -5.10387 | 4.11694    | 4.61633   |
| SLAIN2      | 4.73656  | 4.87978  | 4.33513   | 4.68719  | 5.93817    | 5.85026   |
| SLBP        | 4.72562  | 4.78626  | 4.07386   | 4.44865  | 5.17177    | 5.25617   |
| SLC10A3     | 3.09046  | 2.92948  | 2.46395   | 2.76462  | 4.18909    | 4.60729   |
| SLC10A7     | 3.13855  | 3.04495  | 2.97635   | 2.98657  | 2.33123    | 1.97981   |
| SLC11A2     | 6.08595  | 6.024    | 5.2359    | 5.70895  | 5.56067    | 5.59192   |
| SLC12A2     | 6.09431  | 6.55031  | 5.4298    | 5.7696   | 6.22978    | 6.39558   |
| SLC12A4     | 4.4326   | 4.17951  | 4.73147   | 5.02302  | 4.94595    | 4.28563   |
| SLC12A6     | 3.94932  | 3.862    | 1.87454   | 1.78258  | 2.83519    | 2.48607   |
| SLC12A7     | 2.55596  | 2.88368  | 4.18933   | 4.35674  | -3.85089 ? |           |
| SLC12A8     | -1.1752  | -0.93902 | 4.98702   | 5.72009  | 2.81341    | 3.11984   |
| SLC12A9     | 3.55595  | 3.38733  | 3.75899   | 3.92871  | 3.80423    | 3.95684   |
| SLC13A4     | 0.784805 | 0.785149 | 0.996447  | 0.879925 | 0.909612   | -0.199111 |
| SLC14A1     | 5.24232  | 5.95789  | 2.24695   | 3.1391   | -3.85089   | -2.70579  |
| SLC15A3     | -2.61075 | -2.87684 | 2.65653   | 2.74293  | -0.510371  | -2.24661  |
| SLC15A4     | 3.72088  | 3.83062  | 3.84161   | 4.16962  | 3.94701    | 3.88574   |
| SLC16A1     | 7.07873  | 7.15721  | 6.60496   | 6.91281  | 7.96221    | 7.71661   |
| SLC16A1-AS1 | 3.3844   | 3.54839  | 3.3653    | 3.43614  | 3.34812    | 2.55539   |
| SLC16A13    | 0.243547 | 0.581631 | 1.34008   | 0.902467 | -0.490197  | -0.799586 |
| SLC16A2     | 1.25516  | 0.90354  | 4.41079   | 4.82115  | 5.50301    | 5.8085    |
| SLC16A3     | 3.70388  | 3.20391  | 6.359     | 6.51207  | 7.50824    | 6.91446   |
| SLC16A4     | 3.11048  | 3.16528  | 4.9361    | 5.44137  | 3.74272    | 4.0316    |
| SLC16A6     | 0.86656  | 1.50328  | 0.657521  | 1.74785  | -3.12253   | -4.01143  |
| SLC16A7     | 4.83765  | 5.01844  | 5.15409   | 5.55694  | 3.74163    | 3.84595   |
| SLC16A9     | -6.68418 | -6.45019 | 0.662041  | 0.120113 | 3.74907    | 4.69949   |
| SLC17A5     | 3.44175  | 3.32994  | 2.08328   | 2.74293  | 3.45083    | 3.32671   |
| SLC18B1     | 3.59439  | 3.12774  | 2.57138   | 2.75537  | 3.86912    | 3.89876   |
| SLC19A1     | 3.75742  | 3.66843  | 4.50113   | 4.6623   | 4.41035    | 4.08102   |
| SLC19A2     | 4.1904   | 4.15462  | 2.92239   | 3.1603   | 3.22082    | 3.01439   |
| SLC19A3     | 2.2493   | 2.14451  | -4.18092  | -4.52056 | 1.07446    | 0.951558  |
| SLC1A1      | 2.31774  | 2.86134  | 2.34397   | 3.03329  | 3.05908    | 3.36206   |
| SLC1A3      | 1.32333  | 2.02903  | 3.71432   | 4.19609  | 5.94819    | 6.05733   |

|              |            |            |           |           |            |           |
|--------------|------------|------------|-----------|-----------|------------|-----------|
| SLC1A4       | 7.18815    | 7.32832    | 2.72036   | 3.65106   | 2.88079    | 2.8932    |
| SLC1A5       | 6.32268    | 6.21142    | 6.54271   | 6.81058   | 6.72286    | 6.50385   |
| SLC20A1      | 7.64553    | 8.08634    | 6.48163   | 7.22814   | 6.83455    | 7.07273   |
| SLC20A2      | 4.42181    | 4.574      | 3.53244   | 3.73509   | 4.38749    | 4.41869   |
| SLC22A15     | 2.0986     | 2.21665    | 1.50302   | 2.31325   | 0.0540566  | 0.0747657 |
| SLC22A17     | -5.69162 ? |            | 1.30837   | 1.31748   | -3.19956   | -3.38329  |
| SLC22A18     | 0.334442   | -0.0703893 | 2.05012   | 2.32582   | 0.679613   | 0.951558  |
| SLC22A23     | 3.1696     | 3.24778    | 3.40155   | 3.5401    | 5.59883    | 5.02745   |
| SLC22A4      | 1.55138    | 2.16426    | 2.39446   | 3.19406   | 0.0389839  | 0.615294  |
| SLC22A5      | 3.65737    | 3.49135    | 3.529     | 3.58987   | 2.08454    | 1.493     |
| SLC23A2      | 5.62901    | 5.32706    | 6.03624   | 5.91629   | 5.0552     | 4.16826   |
| SLC24A1      | 3.10828    | 2.94443    | 2.88257   | 2.82487   | 2.06728    | 1.72794   |
| SLC24A2      | 2.49075    | 2.27526    | -3.18222  | -4.52056  | -5.07051   | -5.69922  |
| SLC25A1      | 4.31565    | 4.0149     | 3.91319   | 4.2232    | 4.46315    | 4.40181   |
| SLC25A10     | 3.81853    | 3.49011    | 2.521     | 2.52873   | 3.77259    | 4.08979   |
| SLC25A11     | 4.02776    | 3.96602    | 4.06411   | 4.35873   | 4.69791    | 5.17483   |
| SLC25A12     | 3.76035    | 3.84093    | 3.38253   | 3.95591   | 4.13736    | 4.79611   |
| SLC25A13     | 5.39829    | 5.39276    | 4.87377   | 5.14442   | 5.37821    | 5.48924   |
| SLC25A14     | 1.2426     | 0.894767   | 2.07859   | 2.30482   | 3.00503    | 3.16057   |
| SLC25A15     | 2.84783    | 2.80161    | 1.32432   | 1.56364   | 3.03319    | 3.32395   |
| SLC25A16     | 3.02202    | 2.92733    | 3.23011   | 3.4108    | 3.71906    | 3.28764   |
| SLC25A17     | 4.22574    | 4.22889    | 3.88793   | 4.11397   | 4.2682     | 4.70796   |
| SLC25A19     | 2.17512    | 2.10664    | 1.05306   | 1.6065    | 3.36065    | 3.61141   |
| SLC25A20     | 2.30936    | 2.47381    | 2.42382   | 2.89118   | 2.98535    | 3.51004   |
| SLC25A22     | 3.06748    | 2.82718    | 2.95859   | 3.14856   | 3.20852    | 3.24789   |
| SLC25A23     | 2.2696     | 2.07245    | 2.52039   | 2.67908   | 3.34531    | 3.42257   |
| SLC25A24     | 4.70142    | 4.93085    | 5.13881   | 5.59378   | 4.32951    | 4.84743   |
| SLC25A25     | 2.74834    | 2.64369    | 2.91482   | 3.10469   | 3.59829    | 3.60187   |
| SLC25A25-AS1 | 1.39288    | 1.69588    | 0.590559  | 1.06042   | -0.318274  | -0.54425  |
| SLC25A26     | 2.99305    | 2.97868    | 1.80624   | 2.00441   | 2.65771    | 2.93835   |
| SLC25A27     | 1.56774    | 1.71211    | 3.16521   | 3.26838   | -6.64581 ? |           |
| SLC25A28     | 2.35621    | 2.29539    | 2.90129   | 3.24432   | 2.72987    | 2.43796   |
| SLC25A29     | 4.04968    | 3.67705    | 3.48809   | 3.45235   | 3.23402    | 2.86223   |
| SLC25A3      | 7.62364    | 7.57503    | 6.69336   | 7.10167   | 7.26414    | 7.60814   |
| SLC25A30     | 2.89712    | 3.05483    | 3.40332   | 3.8273    | 3.10427    | 3.50274   |
| SLC25A32     | 4.33705    | 4.49902    | 4.0861    | 4.56468   | 5.40675    | 5.57319   |
| SLC25A33     | 1.66001    | 1.82241    | 1.53913   | 1.76315   | 2.90875    | 3.23989   |
| SLC25A35     | 0.40609    | 0.381062   | 1.25045   | 1.28929   | 0.370901   | 0.423331  |
| SLC25A36     | 5.33743    | 5.36131    | 6.66353   | 6.74817   | 5.35125    | 4.80206   |
| SLC25A37     | 6.70657    | 6.66595    | 6.26329   | 6.25584   | 5.69614    | 4.99285   |
| SLC25A38     | 3.71511    | 3.51       | 3.13754   | 3.28534   | 4.27641    | 4.31692   |
| SLC25A39     | 4.32675    | 4.16103    | 4.41638   | 4.78219   | 5.08913    | 5.159     |
| SLC25A3P2    | 1.44051    | 1.70209    | 0.53081   | 1.30061   | 1.56854    | 1.44307   |
| SLC25A4      | 3.70925    | 3.68435    | 1.59787   | 1.90801   | 3.91428    | 3.77307   |
| SLC25A40     | 3.74936    | 3.97414    | 4.26061   | 4.50349   | 3.4069     | 3.58606   |
| SLC25A42     | 0.301026   | -0.292756  | 1.65571   | 1.83372   | 1.99792    | 1.67702   |
| SLC25A43     | 2.25513    | 2.24453    | 3.08093   | 3.64104   | 3.72769    | 3.89133   |
| SLC25A44     | 5.37138    | 5.36168    | 4.30933   | 4.59679   | 5.42711    | 5.24383   |
| SLC25A45     | 1.60474    | 1.7708     | 0.0645242 | 0.0612232 | -0.852709  | -1.61882  |
| SLC25A46     | 5.02287    | 5.0734     | 5.49199   | 5.8355    | 5.69614    | 5.99543   |
| SLC25A5      | 5.80249    | 5.79531    | 6.40021   | 6.86232   | 7.83955    | 8.31575   |
| SLC25A5-AS1  | -0.174498  | -0.277805  | 1.00153   | 1.09644   | 1.28506    | 2.1241    |

|            |           |           |           |           |           |          |
|------------|-----------|-----------|-----------|-----------|-----------|----------|
| SLC25A51   | 3.31739   | 3.40164   | 2.8494    | 2.96382   | 4.7379    | 4.61164  |
| SLC25A53   | 1.43819   | 1.39497   | 0.703544  | 0.700404  | 1.83837   | 1.91296  |
| SLC25A5P2  | -1.10227  | -0.732052 | -0.167726 | 0.289032  | 1.07312   | 1.24581  |
| SLC25A6    | 5.05706   | 4.76115   | 5.42609   | 5.70213   | 5.2715    | 5.429    |
| SLC26A11   | 2.64966   | 2.50584   | 2.88257   | 2.98393   | 2.3397    | 2.27058  |
| SLC26A2    | 9.42842   | 9.6708    | 5.71658   | 6.00525   | 4.91143   | 5.3486   |
| SLC26A6    | 5.55209   | 5.19759   | 4.36337   | 4.59507   | 5.67396   | 5.06146  |
| SLC27A1    | 2.69071   | 2.32507   | 2.95335   | 3.12927   | 3.45587   | 2.75273  |
| SLC27A3    | 0.493668  | 0.101058  | 0.316204  | 0.321974  | 1.32582   | 0.982641 |
| SLC27A4    | 4.18355   | 4.10699   | 2.68993   | 2.79506   | 3.76596   | 3.64864  |
| SLC27A5    | 1.81322   | 1.4838    | 0.353583  | 0.4804    | 0.224645  | 0.737194 |
| SLC29A1    | 4.53392   | 4.4129    | 3.45853   | 3.70334   | 4.0744    | 3.76699  |
| SLC29A2    | 2.37388   | 2.32284   | 0.0510658 | -0.158238 | -1.11575  | -1.53638 |
| SLC29A4    | -1.08408  | -1.60444  | 2.4422    | 1.67257   | 0.0677351 | -1.79933 |
| SLC2A1     | 5.58023   | 5.86474   | 6.68121   | 7.24431   | 7.85117   | 7.3843   |
| SLC2A1-AS1 | -0.889271 | -1.33321  | 1.47473   | 1.67911   | -0.551587 | -1.24695 |
| SLC2A10    | 1.67164   | 1.31856   | 5.2443    | 5.19094   | 0.270529  | 0.33778  |
| SLC2A11    | 2.11394   | 1.97952   | 3.23505   | 3.39924   | 2.04464   | 1.25862  |
| SLC2A12    | -1.16051  | -1.09328  | 2.60646   | 2.25135   | 5.75726   | 6.25983  |
| SLC2A13    | 3.37372   | 3.88145   | 0.986462  | 0.924662  | 0.799187  | 0.615294 |
| SLC2A3     | 3.24928   | 2.66902   | 5.17219   | 5.27695   | 4.54008   | 3.54567  |
| SLC2A3P1   | 0.249518  | -1.43496  | 0.727668  | 0.513743  | -0.386035 | 2.94751  |
| SLC2A3P4   | 0.153053  | 0.266337  | 0.70794   | 0.712367  | 0.278413  | -1.14402 |
| SLC2A4RG   | 2.96981   | 2.9697    | 3.2045    | 3.5968    | 2.91523   | 3.54122  |
| SLC2A6     | 1.85554   | 1.51448   | 2.84162   | 3.31534   | 1.19772   | 1.25912  |
| SLC2A8     | 1.95558   | 1.85459   | 1.19157   | 1.39901   | 2.01214   | 2.25909  |
| SLC30A1    | 4.68678   | 5.16057   | 3.13163   | 3.85551   | 5.19026   | 6.24347  |
| SLC30A4    | 2.78163   | 2.89359   | 2.98031   | 3.48864   | 2.31933   | 2.64202  |
| SLC30A5    | 4.52696   | 5.10492   | 4.95661   | 5.74952   | 5.01188   | 5.87317  |
| SLC30A6    | 4.87692   | 4.8925    | 4.47379   | 4.66348   | 5.59883   | 5.54711  |
| SLC30A7    | 5.71876   | 6.13263   | 5.79374   | 6.36437   | 6.30292   | 6.39591  |
| SLC30A9    | 5.37638   | 5.45229   | 4.997     | 5.17599   | 6.2546    | 6.58848  |
| SLC31A1    | 5.09614   | 5.03295   | 5.72035   | 6.14796   | 5.18282   | 4.78813  |
| SLC31A2    | 1.8509    | 1.60319   | 1.1267    | 1.678     | 1.56335   | 1.71968  |
| SLC33A1    | 4.56413   | 4.60989   | 4.75458   | 5.00751   | 5.10492   | 4.91256  |
| SLC35A1    | 4.43401   | 4.44095   | 3.02682   | 3.2391    | 3.25361   | 3.99246  |
| SLC35A2    | 4.10585   | 4.20514   | 3.27591   | 4.01787   | 3.3909    | 3.58561  |
| SLC35A3    | 4.14953   | 4.40982   | 3.80232   | 3.83516   | 4.07523   | 4.0246   |
| SLC35A4    | 4.65757   | 4.4964    | 4.49978   | 4.50608   | 5.09291   | 4.94463  |
| SLC35A5    | 3.91194   | 3.9832    | 4.12254   | 4.51779   | 3.57451   | 4.15127  |
| SLC35B1    | 5.16896   | 5.11929   | 4.6596    | 5.11517   | 4.75013   | 5.05649  |
| SLC35B2    | 5.59955   | 5.45039   | 4.76339   | 5.12      | 6.1924    | 6.56445  |
| SLC35B3    | 2.18052   | 2.22717   | 2.5273    | 2.6856    | 2.91901   | 3.28481  |
| SLC35B4    | 5.59668   | 5.71426   | 5.18607   | 5.36537   | 5.35299   | 5.44493  |
| SLC35C1    | 2.63184   | 2.47086   | 3.62865   | 4.13791   | 2.76176   | 3.12301  |
| SLC35C2    | 5.31178   | 5.1715    | 4.72637   | 4.81078   | 5.01212   | 5.20317  |
| SLC35D1    | 4.66833   | 4.96236   | 4.97508   | 5.48828   | 4.44559   | 4.94433  |
| SLC35D2    | 2.9101    | 2.74418   | 2.2002    | 2.37903   | 4.3418    | 4.28197  |
| SLC35E1    | 5.00568   | 5.21265   | 4.63185   | 5.13376   | 6.12596   | 5.96967  |
| SLC35E2    | 1.25818   | 1.05613   | 1.98013   | 1.95124   | 2.02217   | 1.76166  |
| SLC35E2B   | 5.37192   | 5.17992   | 5.45372   | 5.45149   | 5.98523   | 5.39274  |
| SLC35E3    | 5.01559   | 4.77077   | 3.29424   | 3.35266   | 3.74057   | 3.4582   |

|            |           |           |          |          |          |           |
|------------|-----------|-----------|----------|----------|----------|-----------|
| SLC35E4    | 2.15298   | 2.09952   | 1.65628  | 1.87455  | 1.06804  | 1.61526   |
| SLC35F1    | 4.39634   | 4.07049   | -3.37468 | -2.93781 | -2.48959 | -2.53597  |
| SLC35F2    | 3.41335   | 3.50725   | 4.08677  | 4.59076  | 5.71034  | 5.47131   |
| SLC35F5    | 5.54379   | 5.73529   | 5.26097  | 5.5658   | 5.51648  | 5.78912   |
| SLC35F6    | 5.07248   | 5.15261   | 5.55639  | 5.92149  | 5.37272  | 5.21772   |
| SLC35G1    | 4.09451   | 4.09365   | 2.50649  | 2.64273  | 3.98354  | 3.97803   |
| SLC35G2    | 2.83728   | 2.86101   | 3.4872   | 3.66615  | 2.8157   | 3.18136   |
| SLC36A1    | 2.82645   | 2.59516   | 3.21308  | 2.95457  | 2.55645  | 1.97981   |
| SLC36A4    | 3.52371   | 3.56091   | 5.1552   | 5.37296  | 3.85834  | 3.86693   |
| SLC37A2    | 3.44685   | 3.39358   | 2.73064  | 3.53323  | 0.159978 | -0.497071 |
| SLC37A3    | 5.15655   | 5.2514    | 4.32129  | 4.73509  | 5.17258  | 5.45818   |
| SLC37A4    | 4.21208   | 4.23175   | 3.87316  | 3.95002  | 3.88485  | 3.88386   |
| SLC38A1    | 6.26216   | 6.54906   | 7.22718  | 7.97188  | 7.20869  | 7.26697   |
| SLC38A10   | 5.367     | 5.14401   | 4.99016  | 5.13434  | 4.53382  | 4.80008   |
| SLC38A2    | 8.13063   | 8.09549   | 9.52337  | 9.75713  | 8.53651  | 8.66211   |
| SLC38A3    | -2.79121  | -6.45019  | -1.48269 | -2.30078 | 3.95348  | 1.8479    |
| SLC38A6    | 3.42925   | 3.46927   | 3.58717  | 3.54683  | 3.03753  | 3.33637   |
| SLC38A7    | 3.41986   | 3.10701   | 3.606    | 3.46293  | 4.32196  | 3.91716   |
| SLC38A9    | 3.38838   | 3.49715   | 3.69758  | 3.99445  | 4.38135  | 4.84978   |
| SLC39A1    | 6.45777   | 6.12709   | 5.97989  | 6.04343  | 6.41107  | 6.23394   |
| SLC39A10   | 5.61691   | 5.70083   | 4.59044  | 4.80555  | 5.0933   | 5.81878   |
| SLC39A11   | 1.00834   | 1.13712   | 2.91188  | 3.12     | 3.46381  | 3.99719   |
| SLC39A13   | 3.14641   | 3.08598   | 3.72636  | 4.20632  | 3.88657  | 4.13091   |
| SLC39A14   | 7.97279   | 8.13317   | 6.25081  | 7.07008  | 6.66906  | 6.92713   |
| SLC39A3    | 3.18966   | 3.10701   | 2.2841   | 2.43422  | 3.22234  | 3.28481   |
| SLC39A6    | 6.56816   | 6.71901   | 5.36914  | 5.81896  | 5.67562  | 5.85933   |
| SLC39A7    | 6.28884   | 6.31085   | 6.32327  | 6.77567  | 6.84065  | 6.67192   |
| SLC39A8    | 4.47272   | 4.65219   | 3.21094  | 4.40415  | 4.19457  | 5.03559   |
| SLC39A9    | 5.98791   | 6.18348   | 5.33317  | 5.75923  | 6.49797  | 6.7991    |
| SLC3A2     | 6.94115   | 6.83891   | 6.00599  | 6.60003  | 6.56683  | 6.17821   |
| SLC40A1    | ?         | ?         | -5.1783  | -5.10387 | 2.62741  | 3.2358    |
| SLC41A1    | 4.40091   | 4.33644   | 4.42101  | 4.67336  | 4.39767  | 4.09419   |
| SLC41A2    | 2.87078   | 3.46493   | 1.82773  | 2.67254  | 3.15347  | 3.62644   |
| SLC41A3    | 3.53813   | 3.46789   | 3.1828   | 3.13673  | 3.62162  | 3.41998   |
| SLC43A1    | 1.35625   | 0.877069  | 1.8772   | 1.65939  | -4.07293 | -5.69922  |
| SLC43A2    | 1.95916   | 1.14454   | 2.14741  | 2.22044  | 0.305574 | -0.421131 |
| SLC43A3    | 5.38925   | 5.48698   | 4.9779   | 5.72733  | 1.74539  | 1.99375   |
| SLC44A1    | 6.14223   | 5.38381   | 5.02774  | 4.47048  | 5.50391  | 4.76496   |
| SLC44A2    | 3.8107    | 3.09558   | 4.31533  | 4.05356  | 2.81543  | 2.07467   |
| SLC44A3    | -0.450968 | -0.508457 | 0.191626 | 0.685662 | 0.384182 | -0.497069 |
| SLC44A5    | 4.03732   | 4.24279   | -2.48229 | -4.10635 | 3.13897  | 3.68989   |
| SLC45A3    | 2.9698    | 2.81794   | 2.16964  | 2.0561   | 1.66615  | 1.28202   |
| SLC45A4    | 0.62293   | 0.503023  | 2.38255  | 2.17196  | 3.27043  | 3.05151   |
| SLC46A1    | 3.29832   | 3.41747   | 4.02537  | 4.2959   | 3.3314   | 3.76301   |
| SLC46A3    | 1.12752   | 0.736899  | 3.19369  | 3.45341  | 2.42451  | 2.55069   |
| SLC48A1    | 2.21383   | 2.37006   | 2.64304  | 2.89961  | 3.26599  | 3.5003    |
| SLC4A1AP   | 4.57893   | 4.61142   | 3.425    | 3.73026  | 4.63347  | 4.79921   |
| SLC4A1APP1 | 1.6226    | 1.58578   | 0.292911 | 0.638547 | 1.72853  | 1.93191   |
| SLC4A2     | 6.10506   | 6.05142   | 5.93381  | 6.3049   | 6.70154  | 6.85854   |
| SLC4A3     | 2.38308   | 2.05287   | 2.06916  | 2.15798  | 1.77435  | 1.54125   |
| SLC4A7     | 7.68147   | 7.6604    | 7.59033  | 7.63113  | 8.09064  | 8.02374   |
| SLC4A8     | 2.06581   | 3.11464   | 0.925065 | 2.32998  | 4.23223  | 5.38602   |

|             |   |           |            |            |           |            |            |
|-------------|---|-----------|------------|------------|-----------|------------|------------|
| SLC50A1     |   | 4.11149   | 4.25826    | 3.35564    | 3.96932   | 4.441      | 5.08362    |
| SLC51A      |   | -0.315039 | 0.0304491  | 1.22897    | 1.2993    | 1.76848    | 1.32838    |
| SLC52A2     |   | 4.12419   | 3.9393     | 3.71046    | 4.10152   | 4.81617    | 5.03274    |
| SLC5A12     |   | 1.60929   | 1.53719    | -4.18092   | -5.10387  | -6.64581   | -4.70296   |
| SLC5A3      |   | 9.9022    | 10.0237    | 10.2488    | 10.3596   | 8.61739    | 8.28265    |
| SLC5A6      |   | 6.48581   | 6.52347    | 3.69556    | 3.81736   | 5.70161    | 5.54948    |
| SLC6A6      |   | 6.38045   | 6.41667    | 6.97253    | 7.45819   | 8.39566    | 7.65041    |
| SLC6A8      |   | 4.85403   | 4.2059     | 1.81086    | 1.56364   | 5.91976    | 4.55769    |
| SLC6A9      |   | 2.7289    | 2.70627    | 2.53174    | 3.22151   | 2.32264    | 2.2002     |
| SLC7A1      |   | 6.50241   | 6.67077    | 5.262      | 5.69489   | 5.77795    | 5.80453    |
| SLC7A11     |   | 6.49981   | 6.88149    | 8.68278    | 9.08005   | 7.84481    | 7.67087    |
| SLC7A11-AS1 |   | 1.34027   | 1.86201    | 4.40622    | 4.51379   | 2.33714    | 2.1399     |
| SLC7A2      | ? |           | -5.45651   | 3.63186    | 3.60198 ? |            | -5.69922   |
| SLC7A5      |   | 7.77525   | 7.59059    | 5.3096     | 5.91792   | 7.16182    | 5.85336    |
| SLC7A6      |   | 5.15063   | 5.56742    | 4.79026    | 5.2858    | 5.97701    | 6.119      |
| SLC7A6OS    |   | 3.28212   | 3.27047    | 3.66982    | 3.74742   | 4.27646    | 4.33712    |
| SLC8A1      |   | 0.989873  | 1.27651    | 1.41265    | 1.82421   | 2.53968    | 3.1968     |
| SLC8B1      |   | 2.07573   | 2.04497    | 2.95091    | 3.29844   | 1.83956    | 1.67703    |
| SLC9A1      |   | 3.01173   | 2.87032    | 3.23644    | 3.24873   | 2.80118    | 2.46823    |
| SLC9A3R1    |   | 2.35622   | 2.31853    | 2.61739    | 2.86207   | 3.91138    | 3.79485    |
| SLC9A3R2    |   | 1.61837   | 1.33161    | 2.32429    | 2.73353   | 4.47986    | 4.90523    |
| SLC9A5      |   | 1.84067   | 1.74027    | 2.11073    | 2.01172   | 0.528621   | 0.653684   |
| SLC9A6      |   | 3.08883   | 3.63386    | 3.92106    | 4.77991   | 4.35439    | 5.01777    |
| SLC9A7      |   | 4.92615   | 5.12443    | 4.92105    | 5.42984   | 5.02092    | 5.02373    |
| SLC9A8      |   | 3.80275   | 3.67797    | 4.33118    | 4.48081   | 3.03143    | 2.69844    |
| SLC9A9      |   | -1.37679  | -1.60444   | 4.31632    | 4.68882   | -6.64581 ? |            |
| SLC9B2      |   | 2.32607   | 2.57334    | 0.925065   | 1.39106   | 1.62049    | 1.91536    |
| SLCO1B3     |   | -6.68418  | -6.45019 ? |            | -6.09892  | 1.27368    | 1.82067    |
| SLCO2B1     |   | -5.69162  | -6.45019   | 4.43026    | 4.96062 ? |            | ?          |
| SLCO3A1     |   | 3.96091   | 4.16832    | 4.22799    | 4.56977   | 3.51211    | 3.41464    |
| SLCO4A1     |   | 2.41372   | 2.43333    | 4.12026    | 4.51942   | 2.16058    | 1.85761    |
| SLCO5A1     |   | -2.61075  | -2.6546    | -6.17309   | -4.52056  | 2.72987    | 3.70691    |
| SLF1        |   | 4.08963   | 4.25139    | 4.42089    | 4.4515    | 4.20928    | 4.67374    |
| SLF2        |   | 5.10502   | 5.16239    | 5.46753    | 5.61526   | 6.18441    | 6.46292    |
| SLFN11      |   | 3.9654    | 4.16959    | -3.53313   | -4.10635  | 5.69233    | 5.85064    |
| SLFN12      |   | 3.6803    | 3.71954    | 1.5847     | 1.73041   | 3.62161    | 3.9135     |
| SLFN5       |   | 5.5408    | 5.39628    | 6.69605    | 7.0204    | 5.3216     | 5.53108    |
| SLFNL1      |   | 1.49179   | 1.24651    | 1.44713    | 1.27932   | 1.17889    | -0.0395016 |
| SLFNL1-AS1  |   | 1.85554   | 1.68846    | 1.71623    | 1.60018   | 1.3823     | 0.388983   |
| SLIRP       |   | 4.35244   | 4.376      | 3.03556    | 3.52956   | 4.54336    | 5.61592    |
| SLIT2       |   | 5.38672   | 5.02648    | 5.27693    | 5.19893   | 6.31567    | 6.43858    |
| SLIT3       |   | 1.79016   | 1.59503    | -6.17309   | -4.10635  | 0.8704     | 2.0679     |
| SLITRK4     |   | 0.792839  | 0.537236   | 0.871828   | 1.13916   | -6.64581 ? |            |
| SLITRK5     |   | 1.7314    | 1.78511    | -6.17309 ? |           | 4.15746    | 3.5076     |
| SLITRK6     |   | 3.74386   | 2.93804    | 0.156448   | -0.786664 | 4.51897    | 4.14503    |
| SLK         |   | 5.83256   | 5.99294    | 5.93149    | 6.1627    | 6.42162    | 6.64112    |
| SLMAP       |   | 5.5216    | 5.74902    | 5.32129    | 5.59766   | 5.45667    | 5.4632     |
| SLMO2       |   | 6.02476   | 6.20679    | 5.15461    | 5.71433   | 5.83075    | 6.06413    |
| SLPI        | ? |           | -6.45019   | 5.42795    | 6.73704 ? |            | -5.69922   |
| SLTM        |   | 5.99852   | 6.01212    | 5.46527    | 5.62841   | 6.13957    | 5.7211     |
| SLU7        |   | 4.42633   | 4.63188    | 4.53842    | 5.06297   | 4.94052    | 5.41157    |
| SLX1A       |   | 2.14405   | 1.85185    | 1.84252    | 2.0249    | 2.04914    | 1.64257    |

|               |           |          |          |          |           |           |
|---------------|-----------|----------|----------|----------|-----------|-----------|
| SLX1A-SULT1A3 | 1.08681   | 1.09186  | 1.43063  | 0.188034 | 2.36334   | 1.29125   |
| SLX1B         | 1.23793   | 1.40593  | 1.97042  | 2.09471  | 2.06284   | 2.4248    |
| SLX1B-SULT1A4 | 1.68094   | 1.48511  | 1.35074  | 2.0498   | 1.54229   | 1.03659   |
| SLX4          | 3.56301   | 3.41213  | 3.75899  | 3.51506  | 3.54793   | 3.10064   |
| SLX4IP        | 1.76038   | 1.65613  | 3.66667  | 3.54581  | 2.8554    | 2.78515   |
| SMAD1         | 2.30937   | 2.33483  | 1.60441  | 1.83372  | 1.76598   | 2.05486   |
| SMAD2         | 7.12596   | 7.16285  | 5.91744  | 5.95016  | 5.51147   | 5.69469   |
| SMAD3         | 7.23958   | 7.21813  | 6.87447  | 6.98359  | 6.05199   | 5.58905   |
| SMAD4         | 6.14694   | 6.22781  | 5.26096  | 5.28625  | 4.51711   | 4.37009   |
| SMAD5         | 6.33214   | 6.50262  | 6.34563  | 6.68011  | 6.03369   | 5.95053   |
| SMAD5-AS1     | 1.04909   | 0.847652 | 0.96629  | 0.758005 | -0.176802 | -1.24306  |
| SMAD6         | 1.37242   | 0.804012 | 3.71583  | 3.49851  | 2.29099   | 1.77713   |
| SMAD7         | 2.64301   | 2.66902  | 1.46757  | 1.69856  | 1.90196   | 1.57873   |
| SMAD9         | -0.026521 | 0.013012 | 2.15635  | 1.97866  | 1.08794   | 0.100762  |
| SMAGP         | 2.10474   | 2.25977  | 1.82968  | 2.10976  | 1.81131   | 2.21865   |
| SMAP1         | 4.09355   | 4.18289  | 2.47803  | 2.72472  | 4.37733   | 4.53845   |
| SMAP2         | 3.27821   | 3.66387  | 3.72186  | 4.42157  | 4.06335   | 4.48311   |
| SMARCA1       | 4.91332   | 4.76174  | 6.11624  | 6.14474  | 5.97018   | 5.73049   |
| SMARCA2       | 4.69269   | 4.67158  | 4.85402  | 4.76767  | 5.38543   | 5.39131   |
| SMARCA4       | 5.39729   | 5.3078   | 5.20018  | 4.95456  | 5.73735   | 5.47194   |
| SMARCA5       | 6.1847    | 6.29707  | 5.90938  | 6.1659   | 6.21909   | 6.46476   |
| SMARCAD1      | 5.23719   | 5.12022  | 4.61333  | 4.68802  | 5.11159   | 5.08281   |
| SMARCAL1      | 3.30654   | 3.26848  | 3.62383  | 3.74136  | 3.26599   | 3.34314   |
| SMARCB1       | 4.86172   | 4.76235  | 3.83746  | 4.21196  | 4.56308   | 4.70585   |
| SMARCC1       | 6.6318    | 6.61973  | 5.78332  | 5.95221  | 6.68721   | 6.65193   |
| SMARCC2       | 5.58087   | 5.54995  | 5.58303  | 5.56747  | 4.73708   | 4.48072   |
| SMARCD1       | 5.94721   | 6.04121  | 4.472    | 4.62079  | 4.78366   | 4.76394   |
| SMARCD2       | 4.25146   | 4.9899   | 3.98139  | 4.69933  | 4.31123   | 5.2255    |
| SMARCD3       | 2.8029    | 2.7155   | 3.47919  | 3.81302  | 2.05085   | 2.0676    |
| SMARCE1       | 5.46054   | 5.2906   | 5.93756  | 5.93244  | 5.88016   | 5.52577   |
| SMARCE1P5     | 0.0598398 | 0.184496 | 0.587576 | 0.835237 | 0.738699  | 0.241132  |
| SMC1A         | 6.59743   | 6.16739  | 6.22192  | 6.05044  | 6.05199   | 5.10144   |
| SMC2          | 6.24986   | 6.28638  | 5.51084  | 5.78674  | 5.64602   | 5.80897   |
| SMC3          | 6.14106   | 6.17733  | 5.65253  | 5.85179  | 5.88045   | 6.00156   |
| SMC4          | 7.17122   | 7.28581  | 7.44279  | 7.5594   | 7.33669   | 7.27368   |
| SMC5          | 5.66467   | 5.70422  | 5.13783  | 5.14307  | 5.53004   | 5.34641   |
| SMC6          | 5.12349   | 5.2254   | 4.66978  | 4.78447  | 5.25069   | 5.61914   |
| SMCHD1        | 5.62115   | 5.73557  | 6.01459  | 6.11244  | 6.82022   | 6.93533   |
| SMCO4         | -3.11289  | -3.87578 | 0.956094 | 1.31748  | 0.0540566 | -0.151977 |
| SMCR5         | 0.693311  | 0.635262 | 1.13846  | 0.82198  | -0.490197 | -1.38468  |
| SMCR8         | 5.18522   | 5.14485  | 4.87081  | 4.94317  | 5.60532   | 5.11521   |
| SMDT1         | 1.27825   | 1.14454  | 1.82213  | 1.95729  | 1.80324   | 2.21811   |
| SMG1          | 7.14967   | 7.02479  | 7.0756   | 7.06177  | 7.16784   | 6.56347   |
| SMG1P1        | 5.96811   | 5.99262  | 6.24419  | 6.2392   | 5.49008   | 5.35273   |
| SMG1P2        | 2.68232   | 2.96051  | 3.2323   | 3.46979  | 2.7296    | 3.24477   |
| SMG1P3        | 5.8364    | 5.80552  | 6.53773  | 6.48096  | 5.22724   | 5.01891   |
| SMG1P4        | 3.25387   | 3.06906  | 4.12244  | 3.91876  | 3.0798    | 3.09544   |
| SMG1P5        | 3.62969   | 3.45566  | 4.51954  | 4.25402  | 4.57026   | 4.52079   |
| SMG1P6        | 2.2173    | 2.28988  | 1.87363  | 1.59098  | 1.65655   | 1.87239   |
| SMG1P7        | 2.12042   | 2.13193  | 1.83114  | 1.77575  | 2.66538   | 2.48307   |
| SMG5          | 6.30936   | 6.3631   | 5.76301  | 6.03518  | 6.81136   | 6.52511   |
| SMG6          | 3.90552   | 3.75401  | 4.53322  | 4.41896  | 3.94815   | 3.51245   |

|           |           |            |           |          |            |           |
|-----------|-----------|------------|-----------|----------|------------|-----------|
| SMG7      | 5.30511   | 5.10557    | 4.96367   | 4.9773   | 5.37344    | 5.07463   |
| SMG8      | 4.82887   | 4.78803    | 4.16631   | 4.41179  | 4.73308    | 4.93081   |
| SMG9      | 4.00049   | 3.85456    | 3.44035   | 3.49665  | 4.09541    | 3.57638   |
| SMIM10    | 0.207918  | -0.0197685 | 1.97132   | 2.56714  | 2.75121    | 2.99373   |
| SMIM10L1  | 4.10575   | 4.03298    | 3.74379   | 3.77594  | 4.0704     | 4.15931   |
| SMIM11    | 1.98744   | 1.85459    | 2.4312    | 2.81004  | 2.19146    | 2.78515   |
| SMIM12    | 4.1163    | 4.03301    | 3.41266   | 3.88553  | 4.46897    | 4.39788   |
| SMIM13    | 4.61267   | 4.1032     | 3.60764   | 3.60369  | 5.60649    | 4.45567   |
| SMIM14    | 2.39369   | 2.29872    | 3.9263    | 4.54401  | 3.66387    | 3.94254   |
| SMIM15    | 4.68098   | 4.93897    | 4.34377   | 4.77764  | 5.51002    | 5.74585   |
| SMIM19    | 2.30375   | 2.01696    | 1.96116   | 2.17659  | 1.97996    | 2.59708   |
| SMIM20    | 2.43792   | 2.36371    | 1.5714    | 1.83372  | 3.01212    | 4.09419   |
| SMIM3     | 1.39899   | 1.49719    | 4.07386   | 4.73822  | 5.22538    | 5.55948   |
| SMIM4     | 2.09242   | 2.16098    | 1.80301   | 2.11589  | 2.49599    | 2.98409   |
| SMIM5     | -0.489437 | -0.531907  | 0.610974  | 0.300663 | 0.305574   | -0.619042 |
| SMIM7     | 4.54567   | 4.50917    | 4.64819   | 4.57975  | 5.21668    | 5.52532   |
| SMIM8     | 2.81466   | 2.77318    | 1.10193   | 1.02051  | 2.34813    | 2.40182   |
| SMN1      | 4.21625   | 4.09457    | 3.97348   | 4.30035  | 4.45377    | 4.61487   |
| SMN2      | 4.48252   | 4.46867    | 3.90694   | 4.29757  | 4.31587    | 4.58363   |
| SMNDC1    | 3.83327   | 3.80511    | 3.93412   | 3.89258  | 4.30619    | 4.13249   |
| SMO       | 4.44364   | 4.1445     | 4.04095   | 3.47088  | -0.987612  | -2.00571  |
| SMOC1     | -3.11289  | -3.46127   | 1.04535   | 1.83956  | -6.64581 ? |           |
| SMOX      | 2.77261   | 2.4679     | 3.58632   | 4.08593  | 3.69724    | 3.69417   |
| SMPD1     | 4.55888   | 4.41827    | 4.04529   | 4.30902  | 4.03925    | 4.14971   |
| SMPD2     | 1.29511   | 1.28528    | 0.584424  | 1.11028  | 1.62967    | 2.25898   |
| SMPD4     | 5.49149   | 5.35227    | 5.04862   | 5.22881  | 5.10631    | 4.77679   |
| SMPDL3A   | 0.987481  | 1.27867    | -0.401986 | 0.158078 | 1.87499    | 2.68561   |
| SMS       | 5.1027    | 5.87048    | 4.41121   | 5.65396  | 5.15962    | 6.09826   |
| SMTN      | 3.94699   | 3.94113    | 2.98514   | 3.31324  | 2.64931    | 2.87482   |
| SMU1      | 5.19329   | 5.31871    | 4.65811   | 5.08745  | 6.46033    | 6.64003   |
| SMUG1     | 4.27533   | 4.14633    | 3.58135   | 3.72089  | 3.85735    | 4.10385   |
| SMURF1    | 5.21456   | 5.23094    | 5.16555   | 5.39403  | 4.93909    | 4.68878   |
| SMURF2    | 4.88674   | 4.95966    | 5.85791   | 6.20028  | 6.08754    | 5.99933   |
| SMYD2     | 4.8755    | 4.94653    | 3.78659   | 4.00231  | 5.11324    | 5.49109   |
| SMYD3     | 2.95377   | 2.85909    | 3.08093   | 3.27919  | 3.34952    | 3.81685   |
| SMYD4     | 3.42241   | 3.19358    | 4.19586   | 4.08593  | 3.53321    | 3.09095   |
| SMYD5     | 3.53813   | 3.63913    | 3.09028   | 3.32997  | 4.06164    | 3.96747   |
| SNAI1     | 1.83233   | 1.57061    | 1.90396   | 2.12481  | -1.80184   | -1.89883  |
| SNAI2     | -5.10914  | -4.87366   | 3.13163   | 3.72563  | 2.01567    | 3.16365   |
| SNAI3-AS1 | -0.432112 | -0.292758  | 1.39586   | 1.39901  | -2.26731   | -2.24661  |
| SNAP23    | 4.79433   | 5.05997    | 4.2279    | 4.75612  | 4.5544     | 4.84956   |
| SNAP25    | 3.09208   | 2.80161    | 2.47827   | 2.75846  | -0.905167  | -0.536591 |
| SNAP29    | 3.84874   | 3.80158    | 3.72925   | 4.10786  | 2.92466    | 3.16653   |
| SNAP47    | 4.06478   | 4.03224    | 4.02223   | 4.2484   | 4.61647    | 4.74669   |
| SNAPC1    | 4.3615    | 4.15436    | 2.00286   | 2.2794   | 5.21217    | 5.43682   |
| SNAPC2    | 2.05249   | 1.766      | 2.01617   | 2.57067  | 2.37037    | 2.30453   |
| SNAPC3    | 3.99353   | 4.1758     | 4.42022   | 4.77152  | 5.83708    | 5.86271   |
| SNAPC4    | 2.70181   | 2.52869    | 2.28817   | 2.28351  | 2.53199    | 2.48312   |
| SNAPC5    | 3.01328   | 2.95094    | 2.78847   | 3.12028  | 3.49999    | 4.04618   |
| SNAPIN    | 3.04912   | 3.14633    | 2.86361   | 3.1248   | 3.82753    | 4.54712   |
| SNCAIP    | -1.69862  | -2.1403    | 4.13232   | 4.8146   | -2.95876   | -4.70296  |
| SND1      | 7.23255   | 7.1215     | 6.83197   | 7.22348  | 6.76589    | 6.81766   |



|          |           |           |           |           |           |            |
|----------|-----------|-----------|-----------|-----------|-----------|------------|
| SND1-IT1 | 1.97042   | 1.90695   | 1.99422   | 1.86899   | 0.874427  | 0.238163   |
| SNED1    | 2.26782   | 2.36409   | 2.69395   | 2.63814   | 1.6881    | 1.09753    |
| SNF8     | 4.99478   | 5.00781   | 4.85392   | 5.14138   | 4.98794   | 5.06529    |
| SNHG1    | 6.46015   | 6.48351   | 5.75862   | 5.9826    | 5.84474   | 5.97276    |
| SNHG10   | 2.6882    | 2.76955   | 0.899137  | 1.17055   | 2.21936   | 2.01096    |
| SNHG11   | 2.8107    | 2.72204   | 2.05967   | 1.94648   | 1.34536   | 1.40185    |
| SNHG12   | 4.70245   | 4.75035   | 3.38864   | 3.60063   | 5.02606   | 5.00873    |
| SNHG14   | 4.55062   | 4.48796   | 2.30433   | 1.74295   | 3.95439   | 3.581      |
| SNHG15   | 3.84685   | 3.92106   | 2.60139   | 3.127     | 4.02618   | 4.43874    |
| SNHG16   | 8.01602   | 7.30931   | 5.99646   | 5.56179   | 8.41827   | 7.54865    |
| SNHG17   | 4.84443   | 4.801     | 3.52556   | 3.67744   | 4.09791   | 3.88574    |
| SNHG18   | 0.41996   | 0.151976  | 2.31634   | 2.375     | -4.33548  | -3.38329   |
| SNHG19   | 1.45578   | 1.05291   | 0.386425  | 0.619178  | 1.11453   | 1.38079    |
| SNHG20   | 3.10077   | 3.18924   | 2.19608   | 2.43755   | 3.4298    | 3.17235    |
| SNHG21   | 1.54397   | 1.45202   | 0.733632  | 0.816206  | 1.64837   | 1.1755     |
| SNHG22   | 2.74387   | 2.61398   | 2.14293   | 2.16745   | 0.706561  | 0.597145   |
| SNHG25   | 0.619789  | 0.472394  | -1.53701  | -1.35543  | 1.02625   | 2.43792    |
| SNHG3    | 6.71514   | 6.81897   | 5.23503   | 5.39451   | 6.89575   | 6.57086    |
| SNHG4    | 3.72788   | 3.63904   | 2.1923    | 2.31293   | 3.536     | 3.16973    |
| SNHG5    | 5.50579   | 5.55395   | 4.05965   | 4.64689   | 4.02531   | 4.51728    |
| SNHG6    | 3.73918   | 3.67902   | 3.29747   | 3.51459   | 4.32253   | 4.79576    |
| SNHG7    | 3.63871   | 3.58002   | 2.57559   | 2.96936   | 3.27729   | 3.71148    |
| SNHG8    | 3.58632   | 3.57333   | 1.91453   | 2.40689   | 4.50648   | 5.2777     |
| SNHG9    | 0.266817  | -0.27286  | -0.276471 | -0.275776 | 0.210164  | 0.668401   |
| SNIP1    | 3.90176   | 3.91544   | 3.28815   | 3.54222   | 4.05307   | 4.04984    |
| SNN      | 2.69539   | 2.24453   | 3.47647   | 3.60198   | 3.32838   | 3.02121    |
| SNORA12  | 1.50063   | 1.48556   | 1.62387   | 1.60545   | 1.22238   | 2.41742    |
| SNORA21  | 1.30588   | 1.59951   | 0.789571  | 1.68581   | -0.170264 | -0.0360909 |
| SNORA22  | 1.09539   | 1.45008   | 1.37111   | 1.17662   | 0.932212  | 0.816919   |
| SNORA23  | 3.95017   | 3.96027   | 3.16963   | 3.1055    | 3.03492   | 3.63758    |
| SNORA31  | -0.651786 | -1.49394  | 1.27945   | 1.28601   | 1.64113   | 0.850615   |
| SNORA34  | 1.38311   | 1.33154   | 1.33222   | 1.42259   | 0.351018  | 0.443129   |
| SNORA38  | 0.684702  | 0.6247    | 0.431281  | 0.685662  | 0.932212  | 1.06153    |
| SNORA42  | 0.693311  | 0.467978  | 0.976408  | 0.978694  | -0.932127 | -1.18284   |
| SNORA43  | 2.51121   | 2.59063   | 2.19558   | 2.18656   | 1.71424   | 2.47852    |
| SNORA48  | 4.91857   | 4.74365   | 4.81274   | 5.13036   | 5.19247   | 5.60084    |
| SNORA49  | 2.84782   | 2.88146   | 2.7909    | 2.52054   | 1.91336   | 1.76905    |
| SNORA52  | 2.75739   | 2.86482   | 2.06398   | 2.31957   | 1.79152   | 2.77569    |
| SNORA53  | 4.06247   | 4.21223   | 3.3302    | 3.52416   | 3.41784   | 4.91075    |
| SNORA54  | 0.54893   | 0.794611  | 0.445928  | 0.773887  | -0.393347 | 0.401903   |
| SNORA57  | 2.90976   | 2.62439   | 1.43714   | 1.71633   | 1.85238   | 3.23118    |
| SNORA61  | 0.950334  | 1.14338   | -0.165909 | -0.047249 | 0.542228  | 0.729453   |
| SNORA63  | 4.24008   | 4.17813   | 4.78195   | 4.68285   | 5.01456   | 5.46369    |
| SNORA68  | 2.34105   | 2.4184    | 1.83235   | 1.8508    | 1.95923   | 3.65875    |
| SNORA70  | 3.16271   | 3.40111   | 3.33918   | 3.27962   | 2.89442   | 3.60364    |
| SNORA71A | 3.94206   | 3.94336   | 3.44583   | 3.66101   | 3.22539   | 3.42771    |
| SNORA71C | 1.43024   | 1.20963   | 0.355738  | 0.773887  | 0.479334  | 0.33778    |
| SNORA71D | 1.96983   | 1.86361   | 1.24279   | 1.35065   | 0.634389  | 1.70271    |
| SNORA73A | 8.59504   | 8.68801   | 7.90541   | 7.8963    | 8.37747   | 8.89619    |
| SNORA73B | 8.2961    | 8.33648   | 7.22585   | 7.26158   | 8.01695   | 8.72294    |
| SNORA74  | 0.133932  | -0.140771 | -0.510905 | -0.682344 | 0.0263185 | 0.805664   |
| SNORA74A | 4.02883   | 3.99453   | 3.2718    | 3.27272   | 3.86717   | 4.95772    |

|           |           |           |           |           |           |          |
|-----------|-----------|-----------|-----------|-----------|-----------|----------|
| SNORA74B  | 0.840145  | 0.467978  | 1.73537   | 1.30907   | 1.03324   | 1.99375  |
| SNORA77   | 0.581891  | 0.761881  | 0.333859  | 0.390657  | -1.05345  | 0.352273 |
| SNORA79   | 2.91379   | 2.78508   | 2.12484   | 2.10065   | 2.04015   | 2.44305  |
| SNORA7A   | 1.13418   | 1.32658   | 0.347348  | 0.806506  | 1.19146   | 2.54558  |
| SNORA80A  | 0.345419  | 0.503023  | 0.584741  | 0.978694  | -0.374735 | 0.769095 |
| SNORA80B  | -0.289526 | 0.122235  | -1.05395  | -0.55404  | -0.637731 | 1.42261  |
| SNORD10   | 3.64706   | 3.67401   | 3.75317   | 3.59183   | 3.27216   | 4.52258  |
| SNORD13   | 0.897388  | 0.896388  | 1.30071   | 1.32958   | 1.50377   | 0.411415 |
| SNORD15B  | 2.83426   | 2.80862   | 1.91979   | 2.03585   | 1.57335   | 2.13879  |
| SNORD17   | 7.73925   | 7.53706   | 7.08968   | 6.95034   | 6.56428   | 7.56532  |
| SNORD3A   | 12.0744   | 11.8043   | 12.206    | 12.4204   | 10.6212   | 12.78    |
| SNORD3B-1 | 2.96165   | 3.49618   | 5.07954   | 5.36183   | 7.67103   | 10.0065  |
| SNORD3B-2 | 2.0752    | 2.42545   | 5.25223   | 5.18583   | 7.5753    | 9.96497  |
| SNORD3C   | 3.03015   | 3.5608    | 3.79223   | 3.90496   | 1.18649   | 3.01116  |
| SNORD3D   | 8.64749   | 8.78681   | 8.89384   | 9.11293   | 8.28539   | 9.10008  |
| SNORD94   | 1.04244   | 0.885949  | 0.401532  | 0.845438  | 0.134221  | 1.25912  |
| SNORD97   | 2.86123   | 2.81765   | 2.76394   | 2.99226   | 2.9481    | 3.26315  |
| SNPH      | 1.18361   | 1.14454   | 2.33219   | 2.74605   | -2.33767  | -1.53638 |
| SNRK      | 4.41506   | 4.45097   | 4.07839   | 4.29482   | 4.62384   | 4.17073  |
| SNRNP200  | 7.67512   | 7.71835   | 6.8314    | 7.01925   | 7.74048   | 7.5444   |
| SNRNP25   | 1.81369   | 1.94682   | 2.88844   | 3.43851   | 3.31368   | 3.62428  |
| SNRNP27   | 3.61606   | 3.50005   | 3.06203   | 3.38601   | 4.3411    | 4.29707  |
| SNRNP35   | 2.84487   | 2.92538   | 2.18767   | 2.352     | 2.48691   | 2.3058   |
| SNRNP40   | 5.42904   | 5.39363   | 4.58961   | 5.03927   | 5.21842   | 5.42643  |
| SNRNP48   | 4.0633    | 4.18909   | 3.91845   | 4.03583   | 4.27337   | 4.10867  |
| SNRNP70   | 5.45762   | 5.39552   | 5.58548   | 5.70214   | 6.07821   | 5.39329  |
| SNRPA     | 5.02111   | 4.8985    | 4.46659   | 4.7327    | 4.85336   | 4.68876  |
| SNRPA1    | 3.3441    | 3.29208   | 3.27281   | 3.42303   | 3.36403   | 3.11296  |
| SNRPB     | 6.3554    | 6.2494    | 5.90749   | 6.4252    | 5.83379   | 6.35566  |
| SNRPB2    | 7.65753   | 7.37472   | 4.65489   | 5.06358   | 4.81188   | 5.35653  |
| SNRPC     | 5.11177   | 4.98596   | 4.4937    | 4.89631   | 5.77389   | 6.09072  |
| SNRPCP2   | -0.192533 | 0.0544873 | -0.615747 | -0.319134 | 0.749551  | 0.623595 |
| SNRPD1    | 5.33263   | 5.33004   | 4.18392   | 4.56613   | 5.35333   | 5.5497   |
| SNRPD2    | 6.20685   | 6.13287   | 5.37105   | 5.82042   | 6.66671   | 7.50726  |
| SNRPD3    | 5.86436   | 5.96934   | 5.43615   | 5.81529   | 5.51781   | 5.64356  |
| SNRPE     | 4.43372   | 4.18597   | 3.51483   | 3.81361   | 4.54615   | 4.80425  |
| SNRPEP4   | 3.77741   | 3.57237   | 3.00558   | 3.30698   | 3.90783   | 4.81684  |
| SNRPF     | 4.23541   | 4.25166   | 3.81623   | 4.24954   | 3.70583   | 3.84574  |
| SNRPF1    | 1.18922   | 1.40559   | 0.937307  | 1.33631   | 0.95561   | 0.635169 |
| SNRPG     | 4.15922   | 4.18186   | 3.17334   | 3.45845   | 4.19047   | 5.03401  |
| SNRPGP10  | 2.66143   | 2.66747   | 1.44097   | 2.00959   | 2.62275   | 3.55042  |
| SNRPGP15  | 0.837959  | 0.553154  | -0.352529 | -0.149767 | 0.62728   | 1.0624   |
| SNRPN     | 3.43544   | 3.3863    | -11.1841  | -6.09892  | 3.21621   | 3.37142  |
| SNTA1     | 1.40948   | 0.766044  | 2.91977   | 2.87132   | 2.28515   | 1.97279  |
| SNTB1     | 4.41393   | 3.83558   | 3.40481   | 3.65213   | 1.20791   | 0.648208 |
| SNTB2     | 5.18177   | 5.0355    | 6.12528   | 6.43678   | 6.10792   | 5.59763  |
| SNU13     | 5.50762   | 5.52867   | 4.8499    | 5.30796   | 5.43277   | 5.71532  |
| SNUPN     | 3.55663   | 3.4545    | 2.50649   | 2.86639   | 2.97843   | 3.42667  |
| SNW1      | 5.14478   | 5.28594   | 4.22246   | 4.62661   | 4.60822   | 4.90434  |
| SNX1      | 6.41564   | 6.1514    | 5.65448   | 5.72485   | 5.38339   | 5.46508  |
| SNX10     | 1.27825   | 1.67161   | -1.93506  | -1.06415  | 0.270529  | 1.3157   |
| SNX11     | 3.6441    | 3.47232   | 2.68377   | 3.00492   | 3.80932   | 4.0263   |

|          |           |           |            |             |            |           |
|----------|-----------|-----------|------------|-------------|------------|-----------|
| SNX12    | 4.36701   | 4.52865   | 4.31133    | 4.86486     | 5.20429    | 5.68073   |
| SNX13    | 6.03032   | 5.91272   | 6.31531    | 6.33309     | 5.79218    | 5.95683   |
| SNX14    | 5.58565   | 5.67126   | 4.71795    | 5.02191     | 5.74753    | 6.50723   |
| SNX15    | 1.08116   | 0.620305  | 0.937164   | 1.64655     | 1.54849    | 1.49207   |
| SNX16    | 1.84784   | 1.7708    | 2.04532    | 2.14858     | 2.60648    | 2.73624   |
| SNX17    | 5.37008   | 5.32852   | 4.64062    | 4.93689     | 5.67503    | 6.28702   |
| SNX18    | 3.52008   | 3.5623    | 5.92042    | 5.98327     | 5.57241    | 5.21065   |
| SNX18P12 | 0.570074  | 0.557836  | 1.8685     | 1.4727      | -0.944924  | -1.57156  |
| SNX18P1Y | -0.871725 | -0.641764 | 0.162519   | -0.00228849 | 0.619385   | 0.220491  |
| SNX19    | 5.33742   | 5.38964   | 6.07505    | 6.3367      | 6.62973    | 6.65302   |
| SNX2     | 4.97024   | 4.85738   | 4.71734    | 5.05105     | 4.83852    | 5.26697   |
| SNX21    | 4.18359   | 4.10781   | 3.85799    | 4.11323     | 3.13839    | 3.2077    |
| SNX22    | 5.31617   | 5.03795   | 4.97728    | 5.1469      | 4.61172    | 4.67684   |
| SNX24    | 3.61495   | 3.57259   | 2.4327     | 2.78903     | 3.22233    | 3.53407   |
| SNX25    | 4.33308   | 4.37532   | 3.41549    | 3.62721     | 3.54612    | 3.70082   |
| SNX27    | 5.13892   | 5.24149   | 4.568      | 4.85333     | 4.85931    | 4.93713   |
| SNX29    | 2.76029   | 3.07049   | 4.52208    | 4.85616     | 3.28074    | 3.25618   |
| SNX3     | 4.37035   | 4.31852   | 4.71883    | 4.9859      | 6.39213    | 6.61857   |
| SNX30    | 4.95621   | 5.20966   | 3.74878    | 3.87071     | 4.32708    | 4.19565   |
| SNX32    | 0.983802  | 1.14799   | 0.948309   | 1.14663     | -0.0206536 | -0.106816 |
| SNX33    | 4.26271   | 3.9163    | 4.37258    | 4.53845     | 3.78908    | 3.50144   |
| SNX4     | 3.79777   | 3.84549   | 3.75899    | 4.02174     | 4.22386    | 4.57984   |
| SNX5     | 7.0405    | 6.98154   | 6.14129    | 6.33925     | 6.48485    | 6.61871   |
| SNX5P1   | 1.93107   | 1.87384   | 1.08298    | 1.58907     | 1.5526     | 1.85887   |
| SNX6     | 4.3829    | 4.42637   | 3.9808     | 4.40018     | 5.06172    | 5.68958   |
| SNX6P1   | -0.039389 | 0.331671  | -0.0723326 | -0.201784   | 0.135968   | 0.225324  |
| SNX7     | 3.77462   | 3.98931   | 3.44751    | 3.82633     | 4.73201    | 5.53105   |
| SNX8     | 3.52973   | 3.07825   | 3.62383    | 3.86127     | 4.62797    | 4.5076    |
| SNX9     | 4.45925   | 4.61729   | 4.19654    | 4.63622     | 5.03032    | 5.28218   |
| SOAT1    | 6.50987   | 6.35271   | 5.99703    | 6.39173     | 5.56614    | 5.59594   |
| SOBP     | 1.78476   | 1.07637   | 3.54269    | 3.5022      | -0.802092  | -0.577229 |
| SOCS2    | 3.13155   | 2.05907   | -0.220845  | 0.049338    | 3.37205    | 3.62907   |
| SOCS3    | 3.96803   | 2.85909   | 4.40799    | 5.06046     | 4.54792    | 4.85743   |
| SOCS4    | 5.22201   | 5.31232   | 4.50734    | 4.79051     | 5.353      | 5.23944   |
| SOCS5    | 3.63629   | 3.71332   | 5.74718    | 5.97431     | 5.84518    | 6.10745   |
| SOCS6    | 5.83984   | 5.70988   | 4.3013     | 4.53952     | 3.95624    | 3.96923   |
| SOCS7    | 4.69912   | 4.6926    | 3.95346    | 4.02431     | 5.04531    | 4.54121   |
| SOD1     | 5.33746   | 5.41907   | 6.20181    | 6.80258     | 5.4821     | 6.07549   |
| SOD2     | 8.29857   | 7.17832   | 5.50091    | 6.84934     | 5.92425    | 6.07002   |
| SOD3     | 2.07902   | 0.766044  | -3.85951   | -5.10387 ?  |            | -4.70296  |
| SOGA1    | 6.72375   | 6.6337    | 6.01184    | 6.01788     | 5.12839    | 5.21734   |
| SOGA3    | 1.41816   | 1.59261   | 0.626738   | 0.930026    | 2.63554    | 3.20174   |
| SOHLH2   | 4.6261    | 4.65024   | -4.5955    | -3.78492    | -2.49202   | -0.90064  |
| SON      | 7.14768   | 7.06157   | 8.14331    | 8.09549     | 7.22306    | 7.04893   |
| SORBS1   | 3.57472   | 3.46642   | 2.22589    | 2.08102     | 4.12515    | 3.51969   |
| SORBS2   | 3.58979   | 3.01492   | -2.72315   | -1.15432    | 4.73748    | 4.882     |
| SORBS3   | 2.38078   | 2.41874   | 2.59773    | 2.65605     | 2.00149    | 2.23582   |
| SORD     | 4.40383   | 4.39634   | 4.68359    | 4.86681     | 3.58729    | 3.87386   |
| SORD2P   | 2.18225   | 2.43032   | 1.90508    | 2.01674     | 2.21706    | 2.53804   |
| SORL1    | -6.68418  | -6.45019  | -2.01303   | -1.35358    | 3.7764     | 4.29328   |
| SORT1    | 6.68437   | 6.51786   | 5.17948    | 5.17249     | 7.64001    | 7.23066   |
| SOS1     | 4.70443   | 4.61596   | 5.29323    | 5.2613      | 4.87349    | 4.807     |

|            |           |            |            |          |           |           |
|------------|-----------|------------|------------|----------|-----------|-----------|
| SOS1-IT1   | 0.0559314 | -0.39658   | 0.838911   | 0.383121 | 0.222446  | -0.662104 |
| SOS2       | 3.93754   | 4.029      | 3.81648    | 3.99576  | 3.97633   | 4.3087    |
| SOWAHC     | 4.17973   | 4.61196    | 1.83331    | 2.16265  | 1.74911   | 1.76905   |
| SOX11      | 4.85166   | 4.74599    | 3.21094    | 3.56005  | -6.64581  | -3.70484  |
| SOX12      | 2.62736   | 2.41981    | 3.58796    | 3.53503  | 2.90765   | 2.35939   |
| SOX13      | 1.96272   | 2.09942    | 2.1019     | 2.35062  | 4.5631    | 4.35127   |
| SOX2       | 3.10989   | 3.02299 ?  |            | -6.09892 | 6.87944   | 6.51758   |
| SOX2-OT    | 0.219896  | -0.0197685 | -4.59508   | -4.52056 | 7.14495   | 7.20372   |
| SOX21-AS1  | -6.68418  | -5.45651 ? | ?          |          | 3.64803   | 2.80505   |
| SOX4       | 3.84201   | 3.51157    | 5.15465    | 4.88834  | 5.85291   | 5.55537   |
| SOX5       | 6.4606    | 6.10819    | 2.50299    | 2.35471  | 4.64632   | 4.23139   |
| SOX6       | 4.2078    | 3.72327    | 1.46757    | 0.491176 | 0.568587  | -0.662104 |
| SOX9       | -5.10914  | -5.45651   | 3.52901    | 3.38102  | 5.55885   | 4.9824    |
| SP1        | 6.17805   | 6.11481    | 6.24327    | 6.43832  | 5.85194   | 5.642     |
| SP100      | 4.57788   | 4.60352    | 4.63817    | 5.08927  | 5.23874   | 5.48341   |
| SP110      | 2.33226   | 2.07292    | 3.36431    | 3.66451  | 3.60909   | 3.70512   |
| SP140L     | 3.26612   | 3.43567    | 3.67561    | 3.99193  | 3.87408   | 3.6265    |
| SP2        | 1.00142   | 0.746683   | 1.00636    | 0.810106 | 0.815493  | 0.100762  |
| SP2-AS1    | 1.27825   | 1.23764    | 1.30034    | 1.21315  | 0.782702  | 0.50283   |
| SP3        | 6.33277   | 6.38166    | 6.8792     | 7.06236  | 6.53409   | 6.86003   |
| SP4        | 3.8999    | 3.66127    | 3.44947    | 3.36894  | 3.53936   | 3.08771   |
| SPA17      | 0.941046  | 1.00378    | 2.46819    | 2.86847  | 0.925354  | 2.07964   |
| SPACA6P    | 1.70984   | 1.64139    | 3.00521    | 3.06741  | 3.53468   | 2.78046   |
| SPACA6P-AS | -0.448705 | -0.466606  | 0.437782   | 0.839315 | 0.72181   | -0.452211 |
| SPAG1      | 1.80791   | 2.00891    | 1.84257    | 2.50408  | 2.93008   | 2.98461   |
| SPAG16     | 1.72721   | 1.66131    | 2.80233    | 2.85697  | 2.56129   | 2.96925   |
| SPAG17     | -2.04797  | -1.50354   | -2.85671   | -3.30006 | 6.34336   | 6.26181   |
| SPAG4      | -0.489437 | -0.122851  | 2.05967    | 1.83372  | -0.530833 | -1.06257  |
| SPAG5      | 6.03383   | 6.02892    | 6.19628    | 6.5891   | 6.38872   | 6.21463   |
| SPAG5-AS1  | 1.89729   | 2.10556    | 2.11444    | 2.26503  | 2.71213   | 2.44976   |
| SPAG7      | 3.51158   | 3.4899     | 3.80232    | 4.03838  | 4.31911   | 4.62867   |
| SPAG9      | 6.79651   | 6.85694    | 6.28941    | 6.55205  | 7.13187   | 6.97451   |
| SPARC      | 8.78374   | 8.91169    | 9.38758    | 9.74446  | 10.4937   | 10.4874   |
| SPAST      | 4.53454   | 4.56437    | 3.42381    | 3.5476   | 4.57811   | 4.34584   |
| SPATA13    | 5.6897    | 5.69669    | 4.30531    | 4.53321  | 4.6006    | 4.4097    |
| SPATA2     | 2.94298   | 2.93162    | 2.84162    | 3.03328  | 2.79912   | 2.68561   |
| SPATA20    | 3.53094   | 3.42133    | 4.64381    | 4.82264  | 1.72774   | 2.2475    |
| SPATA24    | 0.0954519 | -0.629746  | 0.102      | 0.19507  | 0.909612  | 0.97985   |
| SPATA2L    | 1.26675   | 0.885949   | -0.0541032 | 0.213217 | 0.293994  | 1.08775   |
| SPATA33    | 2.38308   | 2.43502    | 2.12938    | 2.22211  | 1.84354   | 1.37014   |
| SPATA5     | 5.30794   | 5.39279    | 4.867      | 4.95119  | 5.15788   | 5.14894   |
| SPATA5L1   | 2.78877   | 2.74905    | 1.60441    | 1.94105  | 2.23755   | 2.18205   |
| SPATA6     | 4.12269   | 4.16196    | 1.28413    | 1.25754  | 3.47668   | 3.38604   |
| SPATA6L    | -1.89035  | -0.818747  | -3.37629   | -3.52222 | 1.07446   | 1.80111   |
| SPATA7     | 0.7459    | 0.645757   | 1.2116     | 1.29296  | 0.73187   | 1.24809   |
| SPATC1L    | -0.632781 | -1.00314   | 1.6807     | 1.57771  | 0.395063  | -0.121607 |
| SPATS2     | 4.40748   | 4.25654    | 4.56969    | 4.5724   | 4.20928   | 3.68345   |
| SPATS2L    | 5.1199    | 5.22321    | 4.66243    | 5.20007  | 5.84177   | 5.93035   |
| SPC24      | 4.72612   | 4.69639    | 4.48535    | 4.636    | 5.39939   | 5.4232    |
| SPC25      | 3.03051   | 3.17559    | 2.38255    | 2.4799   | 2.58288   | 3.02461   |
| SPCS1      | 5.25743   | 5.45337    | 4.646      | 5.04304  | 5.50977   | 6.08717   |
| SPCS2      | 4.41128   | 4.5377     | 4.69687    | 4.90142  | 3.92474   | 3.58519   |

|         |            |           |           |            |           |            |
|---------|------------|-----------|-----------|------------|-----------|------------|
| SPCS2P4 | 4.16059    | 4.16397   | 4.34192   | 4.75566    | 3.79594   | 3.8386     |
| SPCS3   | 6.39334    | 6.43139   | 6.81275   | 6.92045    | 6.62494   | 6.6087     |
| SPDL1   | 4.37037    | 4.60458   | 4.72411   | 5.10972    | 5.20232   | 6.05399    |
| SPDYA   | 0.65172    | 0.829671  | 0.433387  | 0.0947225  | 1.97321   | 1.95062    |
| SPDYE1  | 0.59807    | 0.481609  | 1.71481   | 1.33892    | 0.585837  | -0.637756  |
| SPDYE11 | 0.17291    | 0.61696   | 0.665829  | 0.909842   | -0.178344 | -0.764704  |
| SPDYE16 | 0.366789   | 0.317107  | 1.11789   | 0.793896   | 0.608488  | -0.448363  |
| SPDYE2  | 1.6014     | 1.41758   | 2.1874    | 2.03928    | 1.501     | 0.0277769  |
| SPDYE2B | 0.308885   | -0.285342 | 0.444487  | 0.732269   | 0.405796  | -0.763256  |
| SPDYE3  | 1.0704     | 1.28855   | 0.968732  | 1.05571    | 0.91873   | 0.725689   |
| SPDYE5  | 1.22453    | 1.34381   | 1.61487   | 1.16693    | 0.327768  | -0.46741   |
| SPDYE6  | 1.35428    | 1.3195    | 1.45734   | 1.57599    | 1.46797   | 0.610303   |
| SPDYE9P | -0.616698  | 0.0477338 | 0.876951  | -0.0140887 | 0.0731621 | -0.840009  |
| SPECC1  | -2.30606   | -2.76144  | 6.25162   | 6.38926    | 7.4551    | 7.52107    |
| SPECC1L | 5.9836     | 5.69478   | 5.8053    | 5.74663    | 5.39508   | 4.76921    |
| SPEG    | 2.27535    | 1.90454   | 2.49023   | 2.19953    | 4.2208    | 3.95541    |
| SPEN    | 6.01859    | 5.96367   | 5.92172   | 5.80368    | 5.87957   | 5.69522    |
| SPG11   | 5.17059    | 5.1602    | 5.07353   | 5.0601     | 5.60502   | 5.76406    |
| SPG20   | 5.53156    | 5.64894   | 5.24222   | 5.60369    | 5.25255   | 5.5965     |
| SPG21   | 4.24196    | 4.37948   | 4.40893   | 4.8388     | 4.6823    | 5.10947    |
| SPG7    | 5.03595    | 4.98939   | 5.23801   | 5.27162    | 4.52826   | 4.03811    |
| SPHK1   | 2.08884    | 1.92519   | 1.12031   | 1.54226    | 2.15349   | 2.20619    |
| SPHK2   | 1.99287    | 1.23573   | 2.00607   | 1.99328    | 2.5041    | 2.29303    |
| SPICE1  | 4.06993    | 4.09557   | 4.15632   | 4.03072    | 3.93028   | 3.49786    |
| SPIDR   | 5.03647    | 4.82832   | 5.16686   | 5.23546    | 4.04619   | 4.04315    |
| SPIN1   | 5.25148    | 5.25396   | 4.93606   | 5.16612    | 5.66272   | 5.87964    |
| SPIN2A  | -0.0190695 | -0.31204  | 0.774621  | 0.206831   | 0.689362  | 0.00319923 |
| SPIN2B  | 1.05233    | 0.903154  | 1.42138   | 1.5448     | 2.44797   | 2.80766    |
| SPIN3   | 1.19579    | 1.35098   | 1.29226   | 1.36695    | 2.20079   | 2.22404    |
| SPIN4   | 2.23758    | 2.62463   | 2.50998   | 2.46861    | 3.01212   | 2.61973    |
| SPIRE1  | 3.39019    | 3.2336    | 3.95218   | 4.14008    | 4.7956    | 4.35633    |
| SPIRE2  | 2.45575    | 2.28536   | 2.5273    | 2.67909    | 1.46901   | 1.13883    |
| SPNS1   | 3.52832    | 3.22993   | 3.45158   | 3.27494    | 3.17878   | 3.23413    |
| SPOCD1  | 1.02889    | 1.46339   | -0.161006 | 1.04469    | 0.437814  | 1.32676    |
| SPOCK1  | 6.02946    | 6.05656   | 2.8305    | 2.89118    | 5.67676   | 5.95326    |
| SPON1   | 0.529821   | 0.498384  | 1.11905   | 1.16735    | 1.51833   | 1.25563    |
| SPOP    | 4.81365    | 4.74721   | 4.47468   | 4.56713    | 4.52456   | 4.74243    |
| SPOPL   | 4.48724    | 4.17984   | 3.89453   | 3.7731     | 5.59505   | 5.0285     |
| SPP1    | 5.5258     | 6.17354   | 2.9713    | 3.61227    | 7.4775    | 8.3409     |
| SPPL2A  | 5.41507    | 5.5847    | 4.2553    | 4.77639    | 5.68111   | 5.90785    |
| SPPL2B  | 2.2493     | 1.8318    | 2.86088   | 2.93284    | 2.32555   | 2.14505    |
| SPPL3   | 4.54529    | 4.49425   | 3.58796   | 3.59161    | 3.51835   | 3.67266    |
| SPR     | 3.50548    | 3.35893   | 3.55458   | 3.80555    | 3.73522   | 4.17133    |
| SPRED1  | 5.91309    | 6.00215   | 4.50955   | 4.73666    | 4.90764   | 4.75884    |
| SPRED2  | 4.72613    | 4.65284   | 3.44947   | 3.22209    | 3.52705   | 3.36475    |
| SPRED3  | 2.01862    | 2.08021   | 1.18285   | 1.51326    | 2.22845   | 1.60621    |
| SPRN    | 1.39442    | 0.937164  | 1.38959   | 1.0165     | 1.5342    | 1.19821    |
| SPRTN   | 3.8079     | 3.9672    | 3.53407   | 3.87112    | 3.8392    | 3.85791    |
| SPRY1   | 0.567789   | -0.177294 | 2.48892   | 1.52784    | 2.83155   | 1.95152    |
| SPRY2   | 5.82543    | 5.47452   | 2.79662   | 2.63938    | 3.68288   | 3.3834     |
| SPRY3   | 0.00148521 | -0.292758 | 0.914572  | 1.37503    | 0.339787  | 0.200291   |
| SPRY4   | 5.72928    | 5.73715   | 3.56467   | 3.50219    | 3.49071   | 2.85171    |

|            |           |           |          |           |          |             |
|------------|-----------|-----------|----------|-----------|----------|-------------|
| SPRY4-IT1  | 1.56774   | 1.72206   | 0.045429 | -0.353769 | -1.53062 | -2.70579    |
| SPRYD3     | 2.68463   | 2.61931   | 1.8772   | 2.1152    | 3.29389  | 3.32947     |
| SPRYD4     | 2.42744   | 2.4014    | 3.39903  | 3.47695   | 3.25441  | 3.1778      |
| SPRYD7     | 1.99094   | 2.06855   | 1.7995   | 2.57418   | 2.65484  | 2.61071     |
| SPSB1      | 2.31216   | 2.09176   | 3.05966  | 3.4049    | 0.878914 | 0.832517    |
| SPSB2      | 1.511     | 1.48556   | 2.08796  | 2.29633   | 1.27637  | 1.43288     |
| SPSB3      | 1.66056   | 1.06086   | 1.86795  | 1.94293   | 1.6731   | 2.01507     |
| SPTA1      | -1.41331  | -1.41808  | 3.47647  | 3.26839 ? | ?        |             |
| SPTAN1     | 6.96828   | 7.00855   | 7.06691  | 7.25321   | 7.12131  | 6.82537     |
| SPTBN1     | 8.63273   | 8.69649   | 8.28843  | 8.43886   | 8.53596  | 8.16941     |
| SPTBN2     | 0.855575  | 0.766044  | 2.4164   | 2.3424    | 3.72231  | 3.65523     |
| SPTLC1     | 4.39776   | 4.72292   | 4.16168  | 4.66941   | 4.05512  | 4.65248     |
| SPTLC1P1   | 0.787207  | 1.19605   | 0.956302 | 1.38659   | 0.491607 | 0.938286    |
| SPTLC2     | 5.64214   | 5.54135   | 4.35175  | 4.39599   | 5.11693  | 5.12854     |
| SPTLC3     | 0.108397  | 0.151976  | 2.9839   | 3.71771   | 2.69945  | 3.32119     |
| SPTSSA     | 3.79977   | 3.80978   | 4.06559  | 4.52143   | 4.45798  | 3.91534     |
| SPTY2D1    | 4.50877   | 4.76833   | 4.45927  | 4.96164   | 4.66847  | 5.0224      |
| SQLE       | 5.80176   | 5.94732   | 5.13727  | 5.58291   | 4.98937  | 5.47258     |
| SQRDL      | -2.45229  | -3.29152  | 3.52025  | 4.47569   | 2.12008  | 3.15064     |
| SQSTM1     | 7.44101   | 7.51392   | 8.78994  | 9.6815    | 8.40813  | 9.02009     |
| SRA1       | 4.03332   | 4.0051    | 4.12711  | 4.4256    | 4.83185  | 5.18441     |
| SRBD1      | 4.31214   | 4.21576   | 4.10072  | 4.27487   | 4.25481  | 4.47816     |
| SRC        | 3.72928   | 3.80861   | 3.94576  | 3.93966   | 1.31128  | 1.46325     |
| SRCAP      | 4.44928   | 4.04019   | 4.81399  | 4.39471   | 4.06184  | 4.12781     |
| SRD5A1     | 3.85933   | 3.75026   | 4.41638  | 4.4515    | 4.55522  | 4.0465      |
| SRD5A3     | 3.05681   | 3.48929   | 1.62155  | 2.07192   | 2.9117   | 4.14006     |
| SREBF1     | 4.80623   | 4.50554   | 5.22449  | 5.34555   | 6.35279  | 6.63785     |
| SREBF2     | 6.30841   | 6.15246   | 5.73893  | 5.76406   | 6.25445  | 6.08636     |
| SREK1      | 6.58888   | 6.59494   | 6.93425  | 6.80474   | 7.10981  | 6.55496     |
| SREK1IP1   | 4.24368   | 4.11707   | 4.04769  | 4.04092   | 4.67675  | 4.60389     |
| SRF        | 3.64188   | 3.57469   | 2.92239  | 3.1835    | 4.2917   | 3.99025     |
| SRFBP1     | 4.05327   | 4.00736   | 3.9286   | 4.19989   | 3.88023  | 4.22836     |
| SRGAP1     | 4.36379   | 3.89054   | 3.74503  | 3.77674   | 3.66444  | 3.11347     |
| SRGAP2     | 6.39779   | 6.12785   | 5.95114  | 6.0096    | 5.08812  | 4.72428     |
| SRGAP2-AS1 | 1.57148   | 1.47246   | 1.75831  | 1.6021    | 0.978269 | 0.15694     |
| SRGAP2B    | 5.76736   | 5.73872   | 4.8065   | 4.89489   | 4.87109  | 4.39096     |
| SRGAP2C    | 5.84816   | 5.76582   | 4.94372  | 5.21281   | 6.23261  | 5.95452     |
| SRGAP2D    | 3.43341   | 3.29781   | 2.32204  | 2.8289    | 2.77216  | 2.48243     |
| SRGAP3     | 0.463706  | 0.55615   | 0.738145 | 0.452743  | 4.46136  | 3.97683     |
| SRGN       | 3.68029   | 3.69702   | 6.41918  | 7.18468   | -1.30241 | -0.0341529  |
| SRI        | 5.35041   | 5.41788   | 5.46168  | 6.05261   | 5.00456  | 5.3198      |
| SRM        | 3.92389   | 3.59108   | 3.03565  | 3.40293   | 4.732    | 4.71849     |
| SRP14      | 5.61196   | 5.52575   | 5.03135  | 5.33665   | 5.75795  | 6.10104     |
| SRP14-AS1  | -0.272655 | -0.707737 | 0.445928 | 0.646144  | -0.10558 | -0.00614162 |
| SRP19      | 4.48171   | 4.08728   | 4.23545  | 4.16942   | 5.05701  | 4.74089     |
| SRP54      | 4.75161   | 4.82369   | 3.9145   | 4.34341   | 5.13817  | 5.26768     |
| SRP68      | 4.9861    | 4.86526   | 4.81646  | 4.98656   | 5.13732  | 4.85839     |
| SRP72      | 6.01998   | 6.07355   | 5.53234  | 5.92044   | 7.62388  | 8.10021     |
| SRP72P1    | 0.176629  | 0.387385  | -0.15641 | 0.0668814 | 1.90052  | 2.11161     |
| SRP72P2    | 1.48583   | 1.71211   | 1.31637  | 1.66421   | 3.05197  | 2.8451      |
| SRP9       | 6.07151   | 6.13344   | 6.42458  | 6.6724    | 7.01971  | 7.0411      |
| SRP9P1     | 2.91246   | 2.763     | 2.99485  | 3.35931   | 3.80007  | 4.22077     |

|           |           |           |            |            |           |           |
|-----------|-----------|-----------|------------|------------|-----------|-----------|
| SRPK1     | 6.17238   | 6.3023    | 5.91377    | 6.33634    | 6.13353   | 6.30204   |
| SRPK2     | 5.41644   | 5.38304   | 5.15756    | 5.14643    | 5.11525   | 4.91576   |
| SRPK2P    | 0.370443  | 0.139823  | 0.310538   | 0.0612232  | 0.417942  | 0.0747657 |
| SRPR      | 5.85762   | 5.86805   | 5.91053    | 6.10061    | 6.25707   | 6.24347   |
| SRPRB     | 5.11958   | 5.07029   | 5.08765    | 5.499      | 5.34496   | 5.71854   |
| SRPX      | 5.43471   | 5.5396    | 3.69452    | 4.02302    | 3.84648   | 3.908     |
| SRPX2     | 3.03733   | 2.91654   | 2.66511    | 3.0686     | 4.65256   | 4.74243   |
| SRR       | 2.76024   | 2.65474   | 3.35717    | 3.57208    | 2.86336   | 2.94399   |
| SRRD      | 4.10004   | 4.1979    | 2.93507    | 2.85759    | 3.67999   | 3.76256   |
| SRRM1     | 5.95036   | 5.79243   | 5.7129     | 5.52516    | 5.96457   | 5.56585   |
| SRRM1P3   | 0.609027  | 0.689415  | 1.24822    | 1.05392    | 0.691436  | 0.344079  |
| SRRM2     | 7.27559   | 7.04882   | 7.79798    | 7.52659    | 7.26423   | 7.00389   |
| SRRM5     | 0.397058  | 0.214684  | -0.0203653 | -0.13126   | 0.574741  | -0.710831 |
| SRRT      | 5.69884   | 5.59107   | 5.2443     | 5.49433    | 5.62537   | 5.26194   |
| SRSF1     | 7.97011   | 7.99733   | 7.27323    | 7.52027    | 8.11307   | 7.84753   |
| SRSF10    | 6.90587   | 6.86573   | 6.8769     | 6.90404    | 6.82254   | 6.53072   |
| SRSF11    | 6.89054   | 6.77913   | 7.27013    | 7.15619    | 7.05308   | 6.34754   |
| SRSF2     | 7.35837   | 7.39435   | 6.77029    | 7.03793    | 7.54844   | 7.22392   |
| SRSF3     | 7.28441   | 7.28927   | 6.70388    | 6.99831    | 7.38667   | 7.67954   |
| SRSF4     | 5.13815   | 5.15462   | 5.04588    | 5.21591    | 5.95809   | 5.39525   |
| SRSF5     | 6.12507   | 6.1733    | 5.36095    | 5.55561    | 6.09499   | 5.79163   |
| SRSF6     | 6.72376   | 6.69162   | 6.33827    | 6.46792    | 6.25501   | 6.30138   |
| SRSF7     | 6.63043   | 6.66932   | 5.75715    | 6.09114    | 6.56383   | 6.80922   |
| SRSF8     | 3.28534   | 3.5992    | 2.72338    | 2.97599    | 4.03665   | 4.13406   |
| SRSF9     | 5.70144   | 5.62136   | 5.16158    | 5.4125     | 5.73505   | 5.60818   |
| SRXN1     | 4.88333   | 4.8259    | 6.72305    | 7.23584    | 4.85855   | 5.03439   |
| SS18      | 5.58256   | 5.91329   | 4.92172    | 5.49387    | 4.59176   | 4.6242    |
| SS18L1    | 4.38306   | 4.42361   | 3.87987    | 3.82633    | 4.48434   | 3.88013   |
| SS18L2    | 2.73979   | 2.61931   | 1.89865    | 2.1058     | 3.03869   | 3.79731   |
| SSB       | 6.06147   | 6.13187   | 5.15183    | 5.54464    | 6.26716   | 6.46586   |
| SSBP1     | 5.30793   | 5.26549   | 4.64381    | 5.06484    | 5.62749   | 6.20205   |
| SSBP2     | 1.98744   | 1.47971   | 5.09026    | 5.02688    | 4.11858   | 4.02968   |
| SSBP3     | 2.03857   | 1.62994   | 3.46136    | 3.28135    | 2.65781   | 2.28596   |
| SSBP3-AS1 | -0.768111 | -0.734698 | 1.32432    | 0.989263   | -0.136604 | -0.752286 |
| SSBP4     | 1.51232   | 1.02667   | 1.51478    | 1.52832    | 1.48496   | 1.41777   |
| SSFA2     | 7.00131   | 6.89633   | 7.63585    | 7.66254    | 6.79142   | 7.0998    |
| SSH1      | 6.91796   | 6.52067   | 5.63705    | 5.21872    | 4.41917   | 3.14816   |
| SSH2      | 4.53152   | 4.31851   | 5.61695    | 5.50999    | 5.6213    | 5.14893   |
| SSH3      | 2.31495   | 1.95924   | 2.58798    | 2.74293    | 1.53448   | 1.67702   |
| SSNA1     | 3.45952   | 3.32832   | 2.56803    | 2.92735    | 3.18831   | 3.92991   |
| SSPN      | 1.2076    | 1.63379   | 0.138526   | 0.563685   | 1.18103   | 1.18931   |
| SSR1      | 6.94871   | 6.72094   | 6.76317    | 6.73706    | 7.37135   | 7.19808   |
| SSR2      | 7.85508   | 7.77617   | 6.7224     | 6.98957    | 7.67214   | 7.7596    |
| SSR3      | 6.77821   | 6.80016   | 6.92441    | 7.36556    | 7.22149   | 7.46361   |
| SSR4      | 5.13669   | 5.02764   | 5.28451    | 5.71238    | 5.34326   | 6.05032   |
| SSR4P1    | 0.701877  | 0.581631  | 1.0357     | 1.31748    | -1.23372  | -2.00571  |
| SSRP1     | 7.00403   | 6.93331   | 6.57355    | 6.81812    | 7.27174   | 6.92611   |
| SSSCA1    | 3.31049   | 3.17115   | 2.14919    | 2.50525    | 2.58806   | 2.92917   |
| SSTR2     | 0.577131  | 0.707154  | 2.47044    | 2.49404    | 0.107996  | -0.348991 |
| SSU72     | 4.81021   | 4.69071   | 4.62623    | 4.89818    | 5.58702   | 5.63146   |
| SSX1      | 1.8708    | 1.92155   | -6.17309   | -4.52056 ? |           | ?         |
| SSX2B     | 3.45941   | 3.48905   | -4.59508   | -7.06267 ? |           | ?         |

|                 |           |          |          |          |           |           |
|-----------------|-----------|----------|----------|----------|-----------|-----------|
| SSX2IP          | 4.78825   | 4.92785  | 4.27999  | 4.51322  | 5.70108   | 6.06103   |
| ST13            | 6.01417   | 5.80571  | 5.95935  | 6.18975  | 6.08958   | 5.71464   |
| ST13P15         | 2.91131   | 2.84192  | 3.14216  | 3.17445  | 3.12226   | 2.32411   |
| ST13P18         | 1.65547   | 1.63506  | 1.65745  | 1.8894   | 1.47629   | 1.56908   |
| ST13P19         | 2.60161   | 2.55591  | 2.40987  | 2.76964  | 2.75546   | 2.26485   |
| ST13P3          | 2.24351   | 1.9238   | 2.09495  | 2.22287  | 2.31469   | 1.76513   |
| ST13P4          | 3.28614   | 3.12226  | 3.1104   | 3.43661  | 3.50645   | 3.36032   |
| ST13P5          | 3.1131    | 3.04418  | 3.04279  | 3.3989   | 3.26771   | 2.88327   |
| ST13P6          | 4.1307    | 3.91713  | 3.95816  | 4.18982  | 4.20869   | 3.84495   |
| ST20            | 1.35544   | 1.22047  | 0.658664 | 0.822526 | -0.450654 | -0.169021 |
| ST20-AS1        | 0.545168  | 0.288004 | 0.487353 | 0.905413 | -0.158774 | 0.0799754 |
| ST3GAL1         | 4.87268   | 4.52583  | 6.6404   | 6.46126  | 5.75564   | 5.34041   |
| ST3GAL2         | 4.31284   | 4.24279  | 4.88256  | 4.98129  | 5.23185   | 5.1419    |
| ST3GAL3         | 1.31777   | 1.45008  | 2.31235  | 2.44193  | 2.21315   | 2.03478   |
| ST3GAL4         | 6.56813   | 6.62806  | 3.37298  | 3.73195  | 3.95256   | 4.10385   |
| ST3GAL4-AS1     | 2.50795   | 2.80862  | 1.89332  | 2.13437  | 0.509706  | 0.668401  |
| ST3GAL5         | 4.71983   | 4.71582  | 1.41643  | 1.38307  | -0.302594 | 0.200291  |
| ST3GAL6         | 3.72523   | 3.59505  | 3.4125   | 3.09575  | 2.55159   | 1.95152   |
| ST5             | 3.51493   | 3.13051  | 4.63358  | 4.66172  | 4.57862   | 4.40321   |
| ST6GAL1         | 4.15578   | 4.20337  | 2.11112  | 2.11519  | -3.19956  | -3.38329  |
| ST6GALNAC2      | 3.06464   | 2.78499  | 0.838097 | 0.786596 | 3.55618   | 3.14188   |
| ST6GALNAC3      | 3.22425   | 3.36052  | -2.5977  | -2.02079 | 2.72124   | 3.44811   |
| ST6GALNAC4      | 2.2696    | 2.02502  | 2.8305   | 3.16963  | 2.97994   | 3.49786   |
| ST6GALNAC5      | -0.791952 | -1.37502 | -3.85951 | -2.78591 | 2.00505   | 2.11348   |
| ST6GALNAC6      | 2.95546   | 2.58064  | 3.99926  | 4.32567  | 3.11216   | 3.21367   |
| ST7             | 3.47156   | 3.58969  | 2.71884  | 3.01312  | 3.50722   | 3.94466   |
| ST7-OT4         | 0.773287  | 0.846762 | 0.823285 | 0.479717 | -0.108509 | -0.380936 |
| ST7L            | 3.28778   | 3.56081  | 3.35906  | 3.58106  | 3.43335   | 3.82904   |
| ST8SIA1         | 3.55948   | 3.04098  | 2.79948  | 2.43808  | -2.07475  | -1.89883  |
| ST8SIA4         | 2.45322   | 2.40135  | -3.59683 | -4.52056 | 3.00147   | 2.75682   |
| ST8SIA5         | 7.60357   | 7.71533  | -2.72315 | -2.20128 | -3.48878  | -2.70579  |
| STAC            | 2.3233    | 2.88146  | 2.5512   | 3.19952  | 5.13531   | 5.36406   |
| STAG1           | 5.44169   | 5.56818  | 4.79045  | 5.25724  | 4.5342    | 4.96445   |
| STAG2           | 6.66084   | 6.63534  | 6.23801  | 6.53523  | 6.87831   | 7.30172   |
| STAG3           | 2.48317   | 2.10491  | 2.9641   | 2.61113  | 1.77374   | 0.803723  |
| STAG3L1         | 0.826835  | 0.609348 | 1.12068  | 0.95954  | 0.813566  | 0.514865  |
| STAG3L2         | 3.39746   | 3.32471  | 3.45489  | 3.44558  | 3.32311   | 2.70333   |
| STAG3L3         | 4.24032   | 4.10351  | 3.73905  | 3.84155  | 3.75065   | 3.25067   |
| STAG3L4         | 2.41723   | 2.14923  | 2.37017  | 2.64253  | 2.61167   | 2.58477   |
| STAG3L5P        | 3.73047   | 3.74088  | 3.73816  | 3.86854  | 3.40306   | 2.55778   |
| STAG3L5P-PVRIG2 | 3.99132   | 3.78167  | 4.11864  | 4.25767  | 3.81947   | 2.66775   |
| STAM            | 4.0558    | 4.06853  | 3.32823  | 3.57767  | 3.5888    | 3.44811   |
| STAM2           | 3.61833   | 3.8936   | 3.60111  | 4.11155  | 4.24357   | 4.96394   |
| STAMBP          | 4.83229   | 4.99708  | 4.23221  | 4.63431  | 5.74029   | 5.8266    |
| STAMBPL1        | 3.1115    | 3.05286  | 2.47113  | 3.0611   | 3.22844   | 4.04148   |
| STAP2           | 0.558395  | 0.407614 | 1.16526  | 1.48367  | 1.62974   | 2.03478   |
| STARD10         | 2.50258   | 2.08535  | 2.28245  | 2.19872  | 0.242328  | 0.501964  |
| STARD13         | 6.17452   | 5.80008  | 3.66906  | 3.80528  | 4.99662   | 4.64771   |
| STARD13-AS      | 4.70597   | 4.33737  | 2.22361  | 2.23629  | 3.02939   | 2.65012   |
| STARD3          | 3.50548   | 3.37005  | 3.59784  | 3.72248  | 3.94052   | 4.11026   |
| STARD3NL        | 4.51402   | 4.55535  | 5.06617  | 5.378    | 4.49133   | 5.15669   |
| STARD4          | 5.94266   | 5.76428  | 5.02759  | 5.33169  | 5.35746   | 5.34116   |



|            |           |           |            |           |           |           |
|------------|-----------|-----------|------------|-----------|-----------|-----------|
| STARD4-AS1 | 3.55676   | 3.39864   | 3.68443    | 3.28771   | 3.12919   | 2.41104   |
| STARD5     | 1.41307   | 1.5284    | 1.08657    | 1.52876   | 0.768417  | 0.615944  |
| STARD7     | 6.76285   | 6.88537   | 6.03595    | 6.50604   | 6.98798   | 7.01067   |
| STARD7-AS1 | 0.43312   | 0.013012  | 0.431281   | 0.689362  | 0.973156  | 0.95839   |
| STARD8     | 1.48583   | 1.15192   | -0.568612  | -1.02108  | 1.08121   | 1.50278   |
| STARD9     | 5.02758   | 4.84948   | 4.99885    | 4.65604   | 5.14502   | 4.25328   |
| STAT1      | 5.41823   | 5.46569   | 5.72109    | 6.18189   | 7.09477   | 6.94479   |
| STAT2      | 3.61153   | 3.53997   | 5.19206    | 5.66512   | 5.49512   | 5.073     |
| STAT3      | 5.7915    | 5.76743   | 6.26407    | 6.62417   | 7.2494    | 6.9734    |
| STAT5A     | 1.41857   | 1.57569   | -2.04277   | -1.15204  | 0.61744   | 0.875316  |
| STAT5B     | 4.13875   | 4.13248   | 5.12445    | 5.42398   | 4.81786   | 4.76921   |
| STAT6      | -1.8912   | -2.6546   | 3.05727    | 3.40095   | -3.07415  | -3.70484  |
| STAU1      | 6.27066   | 6.31317   | 6.19094    | 6.45457   | 5.95917   | 5.92898   |
| STAU2      | 3.9679    | 3.96656   | 4.53221    | 4.47689   | 4.7124    | 4.76926   |
| STC1       | 2.64523   | 2.94655   | 6.41409    | 6.88994   | 5.78989   | 5.11187   |
| STC2       | 4.77208   | 4.33724   | 5.25266    | 6.03901   | 5.4225    | 4.21065   |
| STEAP1     | 2.40802   | 2.53722   | 2.24544    | 2.9237    | -2.01588  | -2.62443  |
| STEAP1B    | 2.04425   | 1.92511   | -3.51315   | -2.60617  | -2.572    | -2.45262  |
| STEAP2     | 1.66727   | 1.88591   | 4.45038    | 4.88624   | -1.70566  | -2.70579  |
| STEAP3     | 3.92183   | 4.2045    | 4.49665    | 5.23357   | 4.74906   | 5.00128   |
| STEAP3-AS1 | 0.210813  | 0.0722019 | -0.0913485 | 0.637675  | -0.167112 | 0.107233  |
| STIL       | 5.46863   | 5.50112   | 5.49991    | 5.67006   | 4.95439   | 5.05232   |
| STIM1      | 4.22645   | 4.23847   | 4.64302    | 4.88057   | 3.80014   | 3.42257   |
| STIM2      | 4.40288   | 4.53997   | 3.62543    | 3.60884   | 4.0218    | 4.09419   |
| STIP1      | 7.08762   | 7.04733   | 6.46444    | 6.80913   | 6.71702   | 6.50963   |
| STIP1P3    | 3.18048   | 3.28031   | 2.6393     | 3.1093    | 3.16163   | 2.50459   |
| STK10      | 5.0757    | 4.78449   | 4.79517    | 4.98919   | 4.29678   | 3.79314   |
| STK11      | 3.77106   | 3.63579   | 3.72446    | 3.90486   | 4.61427   | 4.46801   |
| STK11IP    | 3.03902   | 2.9801    | 2.48892    | 2.48364   | 3.40712   | 2.97629   |
| STK16      | 2.96134   | 2.82405   | 3.28728    | 3.68225   | 3.38873   | 3.69265   |
| STK17A     | 5.78898   | 5.93611   | 5.24482    | 5.57679   | 6.69848   | 7.49955   |
| STK17B     | 3.69966   | 3.80861   | 4.82979    | 5.22264   | 4.96127   | 5.25183   |
| STK19      | 2.0771    | 1.86128   | 2.17885    | 2.27525   | 2.97323   | 2.76542   |
| STK24      | 5.458     | 5.38789   | 5.5319     | 5.56094   | 5.26678   | 4.82348   |
| STK25      | 5.20781   | 5.01867   | 4.96894    | 5.18893   | 5.26158   | 5.03953   |
| STK26      | -4.37417  | -4.87366  | -0.455418  | -0.154483 | 4.17968   | 4.00237   |
| STK3       | 3.64596   | 3.57469   | 3.72787    | 3.84348   | 4.65234   | 4.85553   |
| STK32A     | -0.744656 | -0.604659 | 0.242852   | 0.414828  | 3.83753   | 4.13406   |
| STK32B     | 4.42114   | 4.4957    | 3.04048    | 3.38503   | -2.01588  | -4.70296  |
| STK32C     | 0.50068   | 0.645757  | 1.66826    | 1.95189   | 1.32273   | 1.13883   |
| STK33      | -5.10914  | -5.45651  | -6.17309   | -5.10387  | 2.60179   | 3.04483   |
| STK35      | 4.25946   | 4.05776   | 4.78514    | 4.85188   | 3.97631   | 3.37544   |
| STK36      | 4.11207   | 3.88068   | 4.36234    | 4.49662   | 4.54057   | 4.02931   |
| STK38      | 3.80673   | 3.85683   | 4.48269    | 4.7761    | 4.79244   | 4.90983   |
| STK38L     | 3.87267   | 3.84549   | 2.79376    | 2.79807   | 5.09122   | 5.31634   |
| STK39      | 4.02373   | 4.23499   | 3.4108     | 3.80706   | 4.11035   | 4.43411   |
| STK4       | 6.4335    | 6.37175   | 5.85402    | 6.18518   | 6.55926   | 6.2727    |
| STK40      | 4.06909   | 3.12024   | 4.14177    | 3.57592   | 4.76175   | 3.22993   |
| STMN1      | 7.42374   | 7.49737   | 6.55307    | 6.98998   | 7.50294   | 7.97762   |
| STMN3      | 5.17546   | 4.72265   | 5.19316    | 5.3074    | 0.0540566 | -0.121607 |
| STOM       | 4.79477   | 4.98112   | 4.37966    | 4.9038    | 4.97451   | 4.89411   |
| STOML1     | 1.86319   | 1.64048   | 2.44585    | 2.6856    | 2.44561   | 2.90432   |

|               |           |           |             |           |             |           |
|---------------|-----------|-----------|-------------|-----------|-------------|-----------|
| STOML2        | 4.81219   | 4.78269   | 3.95348     | 4.39994   | 5.99522     | 6.40053   |
| STON1         | 3.68563   | 3.09478   | 3.22765     | 3.18162   | 3.97336     | 3.53203   |
| STON1-GTF2A1L | -1.30408  | -1.72029  | -3.1534     | -3.33829  | 1.7068      | 2.0623    |
| STON2         | -3.2383   | -3.29152  | 1.82773     | 3.01271   | 4.49956     | 4.58906   |
| STOX2         | 3.67921   | 3.43953   | 1.95605     | 2.52418   | 0.499649    | 0.785207  |
| STPG1         | 2.35929   | 2.28552   | -1.01182    | -0.61561  | 1.78782     | 2.27117   |
| STRA13        | 4.19422   | 4.02197   | 3.05965     | 3.52052   | 4.84052     | 5.28124   |
| STRA6         | 4.83819   | 5.64863   | 5.93674     | 6.30865   | 2.6844      | 4.08643   |
| STRADA        | 3.78403   | 3.65511   | 3.83371     | 3.83008   | 4.22935     | 3.94239   |
| STRADB        | 3.61027   | 3.42545   | 2.6739      | 2.97552   | 3.8367      | 4.08372   |
| STRAP         | 6.24833   | 6.18222   | 5.48487     | 5.82568   | 6.02308     | 6.29456   |
| STRBP         | 4.26768   | 4.15222   | 2.95701     | 2.85581   | 4.94219     | 4.82482   |
| STRIP1        | 4.28462   | 4.31769   | 4.64776     | 4.9505    | 4.48561     | 4.4732    |
| STRIP2        | 3.31355   | 2.96552   | 2.87177     | 3.1673    | 1.96176     | 1.8479    |
| STRN          | 5.34118   | 5.32628   | 4.66899     | 4.91493   | 5.44852     | 5.23872   |
| STRN3         | 4.33846   | 4.37871   | 3.73831     | 4.0933    | 4.61174     | 4.6309    |
| STRN4         | 4.51828   | 4.30422   | 4.12963     | 4.28571   | 5.31619     | 5.06652   |
| STS           | 2.64078   | 2.31525   | 0.174138    | 0.300663  | 2.73844     | 2.89692   |
| STT3A         | 6.67214   | 6.74965   | 7.12765     | 7.47507   | 6.66863     | 6.66586   |
| STT3B         | 7.30475   | 7.35856   | 6.98652     | 7.1813    | 7.42861     | 7.69907   |
| STUB1         | 3.78789   | 3.6795    | 3.51744     | 4.0031    | 4.7925      | 5.15493   |
| STX10         | 3.67596   | 3.60324   | 3.15187     | 3.37901   | 4.20077     | 4.36875   |
| STX12         | 3.92205   | 3.97802   | 3.76046     | 4.20858   | 4.85489     | 5.21735   |
| STX16         | 5.74484   | 5.69629   | 5.70904     | 5.78238   | 5.56465     | 4.94517   |
| STX16-NPEPL1  | -0.057105 | -0.831628 | 1.30186     | 0.0881959 | 0.791256    | -2.42864  |
| STX17         | 3.23129   | 3.33771   | 3.72813     | 3.85775   | 2.96083     | 3.26483   |
| STX18         | 3.11746   | 3.201     | 3.25104     | 3.64041   | 3.51773     | 3.64506   |
| STX18-AS1     | -1.05967  | -0.971063 | 0.747044    | 0.316609  | 0.405666    | 0.0480548 |
| STX1A         | 2.65203   | 2.69657   | 1.89889     | 2.54686   | 3.01654     | 3.228     |
| STX2          | 3.99614   | 4.02599   | 3.40893     | 3.59523   | 3.48336     | 3.2677    |
| STX3          | 4.3996    | 4.37478   | 3.52557     | 4.10789   | 3.91144     | 4.04147   |
| STX4          | 2.62736   | 2.79926   | 3.03565     | 3.41278   | 3.00503     | 2.88948   |
| STX5          | 3.26237   | 3.23586   | 3.12709     | 3.52416   | 3.09124     | 3.11984   |
| STX6          | 5.40552   | 5.52818   | 5.16558     | 5.42248   | 5.23391     | 5.19005   |
| STX7          | 3.2168    | 3.13148   | 3.78802     | 3.91493   | 5.47185     | 5.37476   |
| STX8          | 2.31216   | 2.30535   | 2.21883     | 2.70817   | 2.97994     | 3.5293    |
| STXBP1        | 2.37077   | 2.53223   | 2.99137     | 3.23684   | 0.643551    | 1.11352   |
| STXBP3        | 4.6857    | 5.1013    | 3.88928     | 4.44095   | 4.51897     | 5.15203   |
| STXBP4        | 4.16123   | 4.30119   | 4.26045     | 4.46102   | 4.3141      | 4.34856   |
| STXBP5        | 4.39814   | 4.46047   | 4.12778     | 4.40274   | 5.47401     | 5.43596   |
| STXBP5L       | 2.31774   | 2.11082   | 1.46037     | 1.24877   | 0.469063    | -0.536593 |
| STXBP6        | 2.31774   | 1.59788   | -2.01303    | -2.30078  | -0.00196773 | -0.421131 |
| STYK1         | -0.865939 | -0.707737 | 1.48185     | 2.01532   | -1.95932    | -0.421131 |
| STYX          | 3.87078   | 3.6507    | 2.9939      | 3.09456   | 4.2614      | 4.00238   |
| STYXL1        | 2.76241   | 2.78271   | 3.08794     | 3.49851   | 2.89812     | 3.17899   |
| SUB1          | 5.50319   | 5.63702   | 5.75959     | 5.93314   | 6.65625     | 7.25024   |
| SUB1P1        | 0.0856014 | 0.284182  | 0.263046    | 0.431099  | 1.02454     | 1.78006   |
| SUB1P3        | 0.598079  | 1.02906   | 0.688395    | 1.13916   | 1.68853     | 2.33982   |
| SUCLA2        | 4.00111   | 4.13741   | 4.12453     | 4.57313   | 4.25351     | 4.64619   |
| SUCLA2P1      | -0.111491 | -0.113369 | -0.00422896 | 0.448436  | 0.255742    | 0.570298  |
| SUCLG1        | 4.66121   | 4.70457   | 4.51343     | 4.98723   | 4.7071      | 5.41482   |
| SUCLG2        | 4.73812   | 4.80272   | 3.98596     | 4.1844    | 4.16069     | 4.5682    |

|            |            |           |           |            |            |           |
|------------|------------|-----------|-----------|------------|------------|-----------|
| SUCLG2-AS1 | 0.45076    | 0.592522  | -0.206091 | 0.0811214  | -0.705893  | -0.280287 |
| SUCLG2P2   | 3.19886    | 3.30709   | 2.55578   | 2.62998    | 2.56843    | 3.13575   |
| SUCNR1     | -5.69162   | -5.45651  | 2.05012   | 0.46112 ?  | ?          |           |
| SUCO       | 5.8149     | 6.16308   | 5.41731   | 5.88973    | 6.01604    | 6.61857   |
| SUDS3      | 5.09651    | 5.2424    | 4.46861   | 4.73171    | 4.72452    | 4.73721   |
| SUDS3P1    | 1.96659    | 2.18056   | 1.28239   | 1.70049    | 1.74439    | 1.85592   |
| SUFU       | 2.39104    | 2.08021   | 2.46754   | 2.45724    | 2.21929    | 1.80111   |
| SUGCT      | 1.15272    | 1.12967   | 0.120378  | -0.0212303 | -0.374735  | -0.247125 |
| SUGP1      | 3.36432    | 3.31842   | 2.9406    | 3.19489    | 3.84165    | 3.61295   |
| SUGP2      | 5.92346    | 5.8577    | 6.1663    | 6.16546    | 6.86988    | 6.36641   |
| SUGT1      | 5.05663    | 5.19134   | 4.87785   | 5.16204    | 5.0954     | 5.42577   |
| SUGT1P2    | 1.08887    | 1.2583    | 0.935482  | 1.04098    | 1.16629    | 1.1637    |
| SULF2      | -0.0407343 | -0.654524 | 5.63795   | 6.42955    | 5.19345    | 5.67194   |
| SULT1A1    | -6.65375   | -6.43535  | 4.19047   | 4.43454    | -1.06106   | -0.328835 |
| SULT1A3    | 0.805243   | 0.923537  | 1.12769   | 1.35235    | 0.97       | -0.21166  |
| SULT1A4    | -0.475403  | -0.847656 | 0.874144  | 1.07003    | 0.959065   | 1.0084    |
| SUMF1      | 4.14326    | 3.91761   | 3.3203    | 3.46293    | 3.96539    | 4.23873   |
| SUMF2      | 6.3721     | 6.30004   | 5.74291   | 5.92036    | 5.67149    | 5.83217   |
| SUMO1      | 5.46235    | 5.52935   | 4.92953   | 5.23323    | 6.13299    | 6.55819   |
| SUMO1P3    | 3.07437    | 3.08099   | 2.6768    | 2.81805    | 3.73297    | 4.33209   |
| SUMO2      | 5.63691    | 5.69354   | 5.66977   | 6.03169    | 6.92844    | 7.03275   |
| SUMO2P1    | 2.26056    | 2.21649   | 2.06024   | 2.52088    | 3.63025    | 3.73434   |
| SUMO2P17   | 0.683337   | 0.709688  | 0.547154  | 0.787533   | 1.88575    | 2.30064   |
| SUMO3      | 4.37703    | 4.27355   | 4.44674   | 4.86485    | 5.63       | 5.89691   |
| SUMO4      | -0.129081  | 0.151976  | 0.793829  | 0.520618   | 1.17894    | 0.878317  |
| SUN1       | 5.62068    | 5.74635   | 6.27855   | 6.56202    | 5.5632     | 5.63572   |
| SUN2       | 6.04592    | 6.00885   | 5.62972   | 6.03484    | 5.64151    | 5.67573   |
| SUOX       | 3.45954    | 3.3637    | 3.21736   | 3.32163    | 3.36482    | 3.22993   |
| SUPT16H    | 7.08682    | 7.22233   | 5.72852   | 6.18982    | 6.85151    | 7.03857   |
| SUPT20H    | 4.55946    | 4.6229    | 4.75275   | 4.75299    | 4.58832    | 4.43614   |
| SUPT3H     | 1.16515    | 1.01295   | 0.503064  | 1.04098    | 1.27048    | 1.34861   |
| SUPT4H1    | 4.39424    | 4.48674   | 3.47084   | 4.09555    | 5.10455    | 5.72955   |
| SUPT5H     | 5.21679    | 5.26846   | 5.05904   | 5.39698    | 5.60646    | 5.69577   |
| SUPT6H     | 6.30989    | 6.30495   | 6.5234    | 6.77914    | 7.02057    | 6.62867   |
| SUPT7L     | 5.1259     | 5.18731   | 4.28734   | 4.54037    | 5.23239    | 5.1142    |
| SUPV3L1    | 3.87361    | 3.8214    | 3.28      | 3.61227    | 4.07778    | 4.0565    |
| SURF1      | 2.1957     | 2.23414   | 2.55795   | 3.02565    | 3.09124    | 3.67697   |
| SURF2      | 1.96272    | 2.17017   | 0.805235  | 1.35049    | 2.68621    | 3.11347   |
| SURF4      | 7.02241    | 6.98491   | 7.13969   | 7.62897    | 6.9607     | 7.18169   |
| SURF6      | 4.24205    | 4.01494   | 3.38361   | 3.52142    | 4.60789    | 4.21661   |
| SUSD1      | 1.26675    | 1.12217   | 2.66823   | 2.77382    | 1.35096    | 1.06153   |
| SUSD2      | -5.10914   | -3.87578  | 3.69758   | 4.33308    | -4.33548   | -2.8983   |
| SUSD5      | 5.38072    | 5.34651   | 3.04289   | 3.38102    | -1.07506   | -1.4584   |
| SUSD6      | 3.03394    | 3.1774    | 2.83608   | 3.0611     | 3.24808    | 3.10386   |
| SUV39H1    | 3.14807    | 3.11954   | 2.15915   | 2.29017    | 2.52521    | 2.49787   |
| SUV39H2    | 4.20379    | 4.27954   | 3.75387   | 3.91148    | 4.10363    | 4.27385   |
| SUV420H1   | 4.6857     | 4.46862   | 4.41266   | 4.24762    | 4.17968    | 3.94971   |
| SUV420H2   | 1.40949    | 0.996642  | 1.47473   | 1.31748    | 1.45867    | 0.951558  |
| SUZ12      | 5.89793    | 5.99637   | 5.2745    | 5.40493    | 5.76642    | 5.65687   |
| SUZ12P1    | 2.79791    | 2.62696   | 3.39715   | 3.27461    | 3.097      | 2.70281   |
| SV2A       | 5.79678    | 5.74197   | 5.66271   | 5.88907    | 6.33477    | 6.316     |
| SV2C       | 3.03054    | 2.82257   | -4.59508  | -3.52222   | -6.64581 ? |           |

|               |           |           |           |              |           |            |
|---------------|-----------|-----------|-----------|--------------|-----------|------------|
| SVBP          | 1.34536   | 1.51447   | 1.96116   | 2.00494      | 2.18833   | 2.64202    |
| SVEP1         | -1.74441  | -2.46206  | 3.70825   | 2.94646      | -3.33694  | -3.70484   |
| SVIL          | 5.97931   | 5.94169   | 1.33552   | 1.3642       | 5.61099   | 5.40735    |
| SVIL-AS1      | 4.06891   | 3.96781   | 3.19912   | 3.2047       | 3.77683   | 3.64454    |
| SVIP          | 3.80858   | 4.03592   | 0.416483  | 0.810106     | 2.47925   | 2.74862    |
| SWAP70        | 4.50487   | 4.48333   | 4.85675   | 5.19037      | 5.19574   | 5.1419     |
| SWI5          | 2.23168   | 2.08792   | 2.25112   | 2.375        | 2.12107   | 2.34315    |
| SWT1          | 2.07572   | 1.89473   | 1.69915   | 1.69856      | 1.8195    | 2.23582    |
| SYAP1         | 5.1507    | 5.28198   | 4.91647   | 5.30532      | 5.24318   | 5.40701    |
| SYBU          | 1.62401   | 1.73692   | -0.861345 | -0.0426024   | 0.384182  | 0.993783   |
| SYCP3         | 1.42171   | 1.65122   | 1.10541   | 0.996483     | 0.168257  | -0.0211732 |
| SYDE1         | 3.11149   | 3.24624   | 2.693     | 3.34443      | 3.63888   | 3.92446    |
| SYDE2         | 2.66068   | 2.52301   | 3.56131   | 3.40095      | 2.73202   | 2.63759    |
| SYF2          | 3.77259   | 3.80043   | 2.69301   | 3.29206      | 4.24358   | 4.73935    |
| SYMPK         | 4.86459   | 4.76175   | 4.54013   | 4.63263      | 5.01608   | 4.75884    |
| SYNC          | 3.23303   | 3.56018   | 1.19349   | 2.04338      | 3.09766   | 3.96358    |
| SYNCRIP       | 7.43248   | 7.49652   | 6.19887   | 6.40565      | 7.48277   | 7.81226    |
| SYNE1         | 5.23367   | 5.17218   | 3.76921   | 4.16729      | 7.15791   | 7.17938    |
| SYNE2         | 7.18695   | 7.052     | 5.85812   | 5.55115      | 6.93446   | 6.67293    |
| SYNE3         | 4.44748   | 4.37004   | 3.14066   | 3.5476       | 0.679613  | 0.560157   |
| SYNGAP1       | 2.63047   | 2.43065   | 2.40987   | 2.21656      | 2.60959   | 1.97513    |
| SYNGR1        | 3.55476   | 2.99659   | 1.68069   | 1.195        | 2.45605   | 2.23582    |
| SYNGR2        | 5.12793   | 5.16782   | 3.641     | 4.01223      | 5.34699   | 5.45483    |
| SYNJ1         | 2.98216   | 3.14818   | 4.21093   | 4.35367      | 3.52084   | 3.62421    |
| SYNJ2         | 5.43597   | 5.7239    | 6.21923   | 6.30502      | 6.45575   | 6.33801    |
| SYNJ2BP       | 5.16652   | 5.27132   | 4.52367   | 4.78739      | 5.48245   | 5.52692    |
| SYNJ2BP-COX16 | 1.19307   | 1.20449   | -0.171705 | -0.000819684 | 1.23896   | 2.25594    |
| SYNM          | 7.32206   | 7.10499   | 3.40898   | 3.50127      | 5.92007   | 5.46893    |
| SYNPO         | 2.89151   | 2.82487   | 4.535     | 4.75069      | 3.10787   | 3.67699    |
| SYNPO2        | 0.278306  | 0.318612  | -0.350462 | 0.399062     | -0.320293 | -0.121607  |
| SYNRG         | 4.84878   | 4.90347   | 5.12423   | 5.19894      | 5.0019    | 5.06311    |
| SYPL1         | 5.85979   | 5.88889   | 5.40095   | 5.63218      | 5.57482   | 5.68453    |
| SYS1          | 4.94367   | 4.90724   | 4.51871   | 4.65032      | 4.3943    | 4.53636    |
| SYT1          | 3.59325   | 4.23063   | -0.161006 | 1.04098      | 3.13249   | 4.39526    |
| SYT11         | 5.83594   | 6.50797   | 3.90923   | 4.75844      | 6.84709   | 7.60019    |
| SYT14         | 4.29455   | 4.31933   | 1.78229   | 2.25751      | -4.65668  | -5.69922   |
| SYT15         | -0.432112 | -0.122853 | 1.40897   | 0.89124      | -0.105579 | -1.24695   |
| SYTL2         | 1.83622   | 1.60328   | 3.60274   | 4.83295      | 2.34252   | 2.67267    |
| SYTL4         | 2.63185   | 2.69198   | 1.96625   | 2.32998      | 3.55158   | 3.22107    |
| SYTL5         | 4.25365   | 4.07921   | -0.428455 | -0.464785    | 3.84452   | 4.61857    |
| SYVN1         | 4.17397   | 4.25144   | 3.73598   | 3.87054      | 3.45107   | 3.38076    |
| SZRD1         | 5.66669   | 5.52477   | 5.71658   | 5.93404      | 6.81451   | 6.72706    |
| SZT2          | 5.11151   | 4.8859    | 5.47146   | 5.57734      | 4.83437   | 4.43942    |
| TAB1          | 3.35892   | 3.025     | 3.21094   | 3.38102      | 2.69725   | 2.85171    |
| TAB2          | 4.76237   | 4.81444   | 5.1271    | 5.27809      | 6.4748    | 6.7174     |
| TAB3          | 4.20027   | 4.1013    | 3.96623   | 3.98129      | 4.09039   | 3.74449    |
| TACC1         | 5.8615    | 6.19963   | 6.96573   | 7.596        | 6.36222   | 6.6492     |
| TACC2         | 2.19576   | 2.17017   | 2.11571   | 2.23549      | 1.84751   | 1.94436    |
| TACC3         | 5.16433   | 5.1592    | 4.89861   | 5.03837      | 5.77195   | 5.4831     |
| TACO1         | 3.29527   | 3.1882    | 3.16521   | 3.45724      | 3.87204   | 4.25905    |
| TACR1         | 0.490837  | 0.746683  | -0.095919 | -0.131402    | 2.1112    | 2.45821    |
| TADA1         | 3.48455   | 3.57471   | 2.78227   | 2.77076      | 3.0384    | 3.05484    |

|           |           |          |          |          |           |         |
|-----------|-----------|----------|----------|----------|-----------|---------|
| TADA2A    | 3.71454   | 3.7356   | 2.72938  | 2.95187  | 3.00681   | 3.35127 |
| TADA2B    | 3.25221   | 3.15187  | 2.76777  | 2.94375  | 3.96265   | 3.64202 |
| TADA3     | 4.71032   | 4.62467  | 3.93793  | 4.18205  | 5.41969   | 5.8899  |
| TAF1      | 4.91804   | 4.80801  | 5.14726  | 5.09838  | 5.39558   | 5.0412  |
| TAF10     | 4.94179   | 4.958    | 4.33736  | 4.76399  | 4.69441   | 4.77518 |
| TAF11     | 3.8821    | 3.82947  | 3.38062  | 3.47425  | 4.7701    | 4.86881 |
| TAF12     | 2.04577   | 2.32181  | 2.53073  | 2.94375  | 3.50961   | 4.23873 |
| TAF13     | 4.162     | 4.33481  | 3.18499  | 3.99839  | 5.20425   | 5.36474 |
| TAF15     | 5.13731   | 4.96813  | 5.02287  | 4.89117  | 5.28347   | 4.54358 |
| TAF1A     | 2.41468   | 2.41981  | 1.90926  | 2.42646  | 2.51213   | 3.05151 |
| TAF1B     | 3.95377   | 3.95394  | 2.61739  | 2.54224  | 3.85637   | 4.17592 |
| TAF1C     | 3.4858    | 3.28367  | 3.8221   | 3.90798  | 3.04187   | 2.53647 |
| TAF1D     | 6.16057   | 6.08324  | 6.33253  | 6.36873  | 6.51943   | 6.82333 |
| TAF1L     | 1.57451   | 1.62968  | 2.07026  | 1.80206  | 2.05277   | 1.78779 |
| TAF2      | 5.02629   | 5.04047  | 4.99388  | 5.26457  | 5.71607   | 5.856   |
| TAF3      | 2.40159   | 2.16288  | 2.4164   | 2.18121  | 2.55887   | 1.80111 |
| TAF4      | 3.2063    | 3.11459  | 2.83885  | 2.67255  | 2.45864   | 2.06149 |
| TAF4B     | 3.51281   | 3.5496   | 1.36342  | 1.59165  | 0.688494  | 1.3157  |
| TAF5      | 3.09534   | 3.2514   | 2.32429  | 2.73039  | 3.10124   | 3.12934 |
| TAF5L     | 4.32675   | 4.2744   | 3.51865  | 3.67907  | 4.53505   | 4.2848  |
| TAF6      | 4.09618   | 3.95156  | 4.06903  | 4.18348  | 3.7291    | 3.66427 |
| TAF6L     | 2.50578   | 2.19385  | 1.69751  | 1.81791  | 2.06829   | 1.9967  |
| TAF7      | 5.98127   | 6.01465  | 5.37823  | 5.59247  | 6.0386    | 6.49295 |
| TAF8      | 3.44302   | 3.40907  | 3.31633  | 3.64773  | 3.88175   | 3.8305  |
| TAF9      | 4.91977   | 4.95769  | 4.67351  | 5.27552  | 5.49128   | 6.08484 |
| TAF9B     | 4.00212   | 4.24823  | 4.32491  | 4.56624  | 5.52665   | 5.18345 |
| TAGLN2    | 6.94799   | 6.96185  | 7.0774   | 7.44012  | 7.55041   | 7.63414 |
| TAGLN2P1  | 4.51156   | 4.56804  | 4.82862  | 5.03882  | 5.0155    | 5.10006 |
| TALDO1    | 5.74281   | 5.75965  | 6.7435   | 7.34041  | 5.44624   | 5.98544 |
| TAMM41    | 2.30656   | 2.29206  | 1.98643  | 1.71775  | 2.63202   | 2.45821 |
| TANC1     | 6.87601   | 6.60826  | 6.76465  | 6.73981  | 6.39619   | 5.97495 |
| TANC2     | 5.32777   | 5.41442  | 4.69682  | 4.69206  | 6.42979   | 6.37473 |
| TANGO2    | 3.16226   | 2.86609  | 3.50792  | 3.76499  | 2.99075   | 2.58722 |
| TANGO6    | 3.39632   | 3.55366  | 3.11082  | 3.40362  | 3.87579   | 4.10596 |
| TANK      | 3.97599   | 4.09653  | 3.85127  | 4.13672  | 4.45017   | 4.97188 |
| TAOK1     | 6.65529   | 6.62275  | 7.11899  | 7.24439  | 7.42334   | 7.28481 |
| TAOK2     | 4.87882   | 4.64175  | 4.84782  | 4.9031   | 4.69722   | 4.47816 |
| TAOK3     | 4.08064   | 3.98836  | 3.5444   | 3.89539  | 3.62046   | 3.79114 |
| TAP1      | 4.86848   | 5.09434  | 5.0269   | 5.38042  | 5.1389    | 5.84871 |
| TAP2      | 4.3195    | 4.51662  | 5.07976  | 5.50177  | 5.38119   | 5.3093  |
| TAPBP     | 5.84173   | 5.83544  | 6.71053  | 6.69691  | 5.86128   | 5.89829 |
| TAPBPL    | 2.90674   | 3.21795  | 3.71612  | 4.11873  | 1.42497   | 1.86742 |
| TAPT1     | 2.86126   | 3.43651  | 2.81366  | 3.48176  | 2.83355   | 3.28481 |
| TAPT1-AS1 | 2.37562   | 2.74081  | 1.99303  | 2.18475  | 2.47885   | 3.12537 |
| TARBP1    | 4.22721   | 4.39823  | 4.669    | 4.64104  | 4.28      | 4.5245  |
| TARBP2    | 3.78976   | 3.5938   | 3.10419  | 3.31954  | 3.03144   | 3.47568 |
| TARDBP    | 6.49228   | 6.40117  | 6.22807  | 6.43903  | 6.78499   | 6.28353 |
| TARID     | 0.0201857 | 0.400494 | 1.94774  | 1.25102  | 1.08121   | 1.29333 |
| TARS      | 6.27211   | 6.42663  | 6.0001   | 6.56801  | 7.17897   | 7.6079  |
| TARS2     | 4.14405   | 3.92947  | 3.163    | 3.59853  | 3.92934   | 3.82661 |
| TARSL2    | 2.53934   | 2.48845  | 1.51     | 1.96266  | 1.1211    | 1.35942 |
| TAS1R1    | 0.824548  | 1.57611  | -3.37468 | -3.30006 | -3.6585 ? |         |

|          |          |          |          |          |           |           |
|----------|----------|----------|----------|----------|-----------|-----------|
| TAS2R13  | 0.987481 | 1.06859  | 1.65571  | 0.761609 | 0.395063  | 0.224139  |
| TAS2R14  | 1.76799  | 1.79458  | 2.05638  | 1.91684  | 1.1211    | 0.522196  |
| TAS2R15P | 1.09832  | 1.22997  | 1.44901  | 1.12963  | 0.362161  | 0.231764  |
| TAS2R18  | 1.32333  | 1.31199  | 1.69303  | 1.32585  | 0.634389  | -0.183001 |
| TAS2R19  | 1.75577  | 1.76368  | 2.23132  | 1.8497   | 0.790972  | 0.592024  |
| TAS2R20  | 0.908313 | 1.15925  | 1.70525  | 1.31748  | 0.405873  | -0.31423  |
| TAS2R30  | 2.24446  | 2.23323  | 2.709    | 2.47862  | 1.66981   | 1.11912   |
| TAS2R31  | 1.36749  | 1.51561  | 1.85035  | 1.65844  | 0.534858  | 0.436236  |
| TAS2R4   | 0.399051 | 0.822624 | -1.53926 | -1.25052 | 1.35096   | 0.965773  |
| TAS2R46  | 0.789963 | 0.852766 | 1.51646  | 1.20393  | 0.0882502 | -0.266838 |
| TAS2R50  | 0.243547 | 0.370142 | 0.860939 | 0.46112  | -0.338214 | -0.848487 |
| TAS2R64P | 1.12426  | 1.14986  | 0.855049 | 0.662215 | 1.76434   | 1.41149   |
| TASP1    | 4.22052  | 3.85682  | 2.63985  | 2.60199  | 3.61115   | 3.68989   |
| TATDN1   | 2.80715  | 3.06861  | 2.49889  | 2.8141   | 3.72252   | 4.52593   |
| TATDN1P1 | 1.50762  | 1.96319  | 1.44957  | 1.71585  | 2.49405   | 3.17467   |
| TATDN2   | 4.91947  | 4.90059  | 4.35515  | 4.48995  | 4.92544   | 4.86629   |
| TATDN2P2 | 2.51768  | 2.50295  | 2.16964  | 2.30482  | 3.57809   | 2.90432   |
| TATDN3   | 1.96983  | 2.20606  | 1.6494   | 2.23992  | 2.14706   | 3.03813   |
| TAX1BP1  | 6.52887  | 6.68651  | 6.42514  | 6.87895  | 6.14066   | 6.87239   |
| TAX1BP3  | 3.83431  | 3.57397  | 3.27261  | 3.90416  | 4.34897   | 4.69407   |
| TAZ      | 2.97158  | 2.77795  | 2.40895  | 2.56007  | 2.84749   | 2.43285   |
| TBC1D1   | 5.00178  | 4.78508  | 4.23643  | 4.5458   | 6.03687   | 5.95416   |
| TBC1D10A | 2.51594  | 2.33316  | 3.276    | 3.58769  | 1.94219   | 2.2246    |
| TBC1D10B | 3.75048  | 3.60177  | 3.80482  | 4.05425  | 4.03722   | 3.86332   |
| TBC1D12  | 3.23166  | 3.20249  | 2.46035  | 2.72407  | 2.92278   | 2.75682   |
| TBC1D13  | 3.38041  | 3.307    | 3.32823  | 3.46483  | 3.92745   | 3.53884   |
| TBC1D14  | 4.98528  | 4.88866  | 4.94908  | 5.19946  | 5.39431   | 5.13984   |
| TBC1D15  | 4.82202  | 4.86806  | 3.99514  | 4.19722  | 3.72986   | 4.10706   |
| TBC1D16  | 5.87434  | 5.53078  | 6.15043  | 6.11905  | 5.19301   | 4.36072   |
| TBC1D17  | 2.37973  | 2.19447  | 2.53725  | 2.75124  | 3.16113   | 3.17132   |
| TBC1D19  | 1.62738  | 1.35098  | 1.6494   | 1.79207  | 1.19149   | 1.71958   |
| TBC1D2   | 0.640852 | 0.775632 | 3.15633  | 4.00491  | 0.549226  | 1.37014   |
| TBC1D20  | 4.2346   | 4.21575  | 5.11739  | 5.38351  | 4.2682    | 3.84211   |
| TBC1D22A | 2.8186   | 2.69955  | 3.68993  | 3.85839  | 2.68842   | 2.61973   |
| TBC1D22B | 2.7408   | 3.08924  | 2.35804  | 2.66405  | 3.27999   | 3.35171   |
| TBC1D23  | 4.41075  | 4.48332  | 4.64222  | 4.99642  | 4.69833   | 5.21064   |
| TBC1D24  | 3.14954  | 3.12653  | 3.26219  | 3.2661   | 3.38837   | 3.16507   |
| TBC1D25  | 2.40159  | 2.44406  | 1.63669  | 1.90242  | 2.3397    | 1.77713   |
| TBC1D2B  | 4.45764  | 4.45824  | 4.51085  | 4.75613  | 4.28147   | 4.52451   |
| TBC1D30  | 3.43663  | 3.57057  | -3.59683 | -3.30006 | 2.17891   | 2.69844   |
| TBC1D31  | 3.49936  | 3.57333  | 3.62222  | 3.82781  | 3.24958   | 3.85933   |
| TBC1D32  | 2.5006   | 2.58701  | 2.47113  | 2.41475  | 3.31124   | 3.54358   |
| TBC1D3L  | 0.709573 | 0.458309 | 1.84771  | 1.67621  | 1.52452   | 0.660363  |
| TBC1D4   | 4.86314  | 5.37637  | 3.72636  | 3.8926   | 5.61114   | 4.95149   |
| TBC1D5   | 5.32294  | 5.46677  | 4.62301  | 4.93965  | 5.4853    | 5.76292   |
| TBC1D7   | 2.63855  | 2.41368  | 2.45673  | 2.6191   | 2.97813   | 3.19415   |
| TBC1D8   | 4.78122  | 4.83404  | 4.9795   | 5.21928  | 3.94885   | 3.54358   |
| TBC1D8B  | 2.93392  | 3.09255  | 2.98139  | 3.27919  | 1.29393   | 1.81687   |
| TBC1D9   | 3.78776  | 3.98216  | 3.5478   | 3.88269  | 4.44494   | 4.73933   |
| TBC1D9B  | 5.44395  | 5.47488  | 5.91218  | 6.08252  | 6.28241   | 6.14776   |
| TBCA     | 5.11559  | 5.0737   | 4.89506  | 5.18585  | 5.83276   | 6.14016   |
| TBCAP1   | 1.97261  | 2.14573  | 1.92155  | 2.23039  | 2.93587   | 2.76273   |

|         |           |          |           |          |           |          |
|---------|-----------|----------|-----------|----------|-----------|----------|
| TBCB    | 4.03923   | 4.08573  | 3.43643   | 3.87411  | 4.69935   | 4.92223  |
| TBCC    | 2.69325   | 2.8455   | 2.38635   | 2.73039  | 3.46381   | 3.64643  |
| TBCCD1  | 2.9588    | 3.00397  | 3.3418    | 3.57357  | 3.81463   | 4.0926   |
| TBCD    | 4.91264   | 4.85919  | 4.56126   | 4.67804  | 4.94497   | 4.4632   |
| TBCE    | 3.6857    | 3.70457  | 3.58135   | 4.01788  | 3.99576   | 4.16211  |
| TBCEL   | 3.87172   | 3.92624  | 4.23327   | 4.4245   | 4.00769   | 4.34856  |
| TBCK    | 3.23964   | 3.28968  | 3.97673   | 4.02795  | 3.61094   | 3.8489   |
| TBK1    | 4.90911   | 5.01839  | 4.44061   | 4.70887  | 5.01735   | 5.61126  |
| TBKBP1  | 1.57708   | 1.00482  | 1.71737   | 1.17662  | -0.152369 | -1.38442 |
| TBL1X   | 2.92115   | 2.51445  | 4.62543   | 4.57064  | 2.49452   | 2.14505  |
| TBL1XR1 | 6.91401   | 6.88792  | 7.5804    | 7.59038  | 7.15983   | 6.97475  |
| TBL2    | 4.48827   | 4.59717  | 4.26665   | 4.6676   | 4.34601   | 4.21661  |
| TBL3    | 2.97809   | 2.6561   | 2.80517   | 3.0859   | 2.68843   | 2.89692  |
| TBP     | 2.77868   | 2.87032  | 2.36339   | 2.72723  | 3.76867   | 3.71536  |
| TBPL1   | 2.9672    | 3.02634  | 2.98732   | 3.1377   | 4.49256   | 4.85353  |
| TBRG1   | 3.69639   | 3.64286  | 3.99361   | 4.13851  | 3.72733   | 3.68968  |
| TBRG4   | 5.47397   | 5.35971  | 4.85333   | 5.14678  | 4.98939   | 5.18049  |
| TBX15   | 0.727258  | 0.419895 | 2.01126   | 2.1296   | -1.75295  | -2.12114 |
| TBX19   | 0.207918  | 0.382745 | -0.897866 | -1.46458 | 1.37865   | 0.615294 |
| TBX2    | 3.81169   | 3.1108   | 0.544485  | 0.445854 | 1.28225   | 0.176042 |
| TBX3    | 3.31075   | 3.44404  | 5.49154   | 5.61567  | 4.93493   | 4.7771   |
| TBXAS1  | 2.87078   | 3.06659  | 4.86291   | 5.20178  | 0.384182  | 0.878317 |
| TCAF1   | 6.17164   | 5.96593  | 6.39226   | 6.43175  | 5.63484   | 5.29345  |
| TCAF1P1 | 2.7544    | 2.51563  | 2.86034   | 3.04865  | 1.81602   | 1.48084  |
| TCAF2   | 2.93241   | 2.73332  | 0.583721  | 0.901131 | 3.19578   | 1.67383  |
| TCAIM   | 3.64135   | 3.6709   | 2.98891   | 3.41277  | 4.16126   | 4.50967  |
| TCEA1   | 5.36351   | 5.52565  | 5.05041   | 5.52377  | 5.30394   | 5.2999   |
| TCEA1P2 | 4.90889   | 4.98451  | 4.55242   | 4.97721  | 4.69516   | 5.14548  |
| TCEA2   | 2.10829   | 1.71709  | 2.7909    | 2.83955  | 2.34533   | 2.39659  |
| TCEAL1  | 2.06734   | 2.48519  | 2.09742   | 2.89957  | 2.57975   | 3.53835  |
| TCEAL3  | 2.85059   | 2.60841  | 2.71676   | 3.13193  | 4.11447   | 3.8289   |
| TCEAL4  | 4.28818   | 4.32994  | 4.02837   | 4.36589  | 4.9663    | 4.73207  |
| TCEAL8  | 3.99789   | 4.00781  | 3.41267   | 3.75381  | 4.13491   | 4.65521  |
| TCEANC2 | 3.64188   | 3.50726  | 3.84714   | 3.87131  | 3.72339   | 3.59707  |
| TCEB1   | 4.1171    | 4.11832  | 4.04649   | 4.43128  | 5.14497   | 5.47257  |
| TCEB2   | 4.56989   | 4.34633  | 4.39624   | 4.92571  | 4.5403    | 5.27978  |
| TCEB3   | 6.25136   | 6.34056  | 5.44278   | 5.78065  | 6.93684   | 6.94588  |
| TCERG1  | 5.71796   | 5.85371  | 6.17868   | 6.22404  | 6.12289   | 5.71481  |
| TCF12   | 5.91079   | 5.93186  | 4.54864   | 4.50311  | 6.15126   | 6.31425  |
| TCF19   | 4.18585   | 4.36978  | 4.49506   | 4.9444   | 5.03406   | 4.99546  |
| TCF20   | 5.87432   | 5.85426  | 5.69566   | 5.74096  | 5.22651   | 4.86408  |
| TCF25   | 4.75879   | 4.42282  | 5.01919   | 5.07479  | 4.51584   | 4.42899  |
| TCF3    | 4.25293   | 3.99144  | 3.87852   | 3.75845  | 4.82702   | 4.3322   |
| TCF4    | 5.51067   | 5.42284  | 5.90857   | 5.6498   | 5.83853   | 5.69841  |
| TCF7    | 3.30514   | 3.09175  | 4.21735   | 4.09451  | 2.26748   | 1.51249  |
| TCF7L2  | 3.04578   | 2.94177  | -3.59683  | -3.78492 | 3.45879   | 3.03509  |
| TCFL5   | 3.28107   | 3.40753  | 2.95084   | 3.19494  | 3.25851   | 3.79479  |
| TCHP    | 3.95079   | 4.00489  | 2.71677   | 3.03991  | 3.21391   | 2.7777   |
| TCIRG1  | 2.21571   | 1.86596  | 4.37065   | 4.664    | 3.11334   | 3.33447  |
| TCN2    | -0.207251 | 0.151846 | 2.4164    | 2.74916  | 2.95428   | 3.53168  |
| TCOF1   | 6.08001   | 6.06901  | 5.64619   | 5.92562  | 6.06228   | 5.82417  |
| TCP1    | 6.76661   | 6.78746  | 6.4275    | 6.87123  | 7.9236    | 8.05816  |

|           |            |           |           |           |             |           |
|-----------|------------|-----------|-----------|-----------|-------------|-----------|
| TCP11L1   | 4.0691     | 4.20714   | 2.58143   | 2.88482   | 3.68073     | 3.77997   |
| TCP11L2   | 1.10753    | 1.41423   | 1.87648   | 2.62038   | 2.14274     | 2.71921   |
| TCP1P1    | 2.16975    | 2.45502   | 1.85142   | 2.45883   | 3.67313     | 3.32808   |
| TCTA      | 2.5817     | 2.47381   | 2.78227   | 3.20633   | 3.01212     | 3.07137   |
| TCTE3     | 1.03569    | 1.21668   | 0.138526  | 0.535117  | 0.643551    | 0.816919  |
| TCTEX1D2  | 0.529821   | 0.819088  | 1.34008   | 1.46864   | 0.688485    | 1.75183   |
| TCTN1     | 3.55429    | 3.27526   | 3.89305   | 3.786     | 2.49687     | 2.16366   |
| TCTN2     | 3.37167    | 3.0826    | 3.41739   | 3.36439   | 2.13302     | 1.75275   |
| TCTN3     | 4.49751    | 4.35493   | 4.62866   | 4.93694   | 4.68009     | 4.99633   |
| TDG       | 4.47768    | 4.85889   | 3.63745   | 4.08413   | 4.26373     | 5.04741   |
| TDGP1     | 1.53475    | 2.03435   | 0.799593  | 1.32965   | 1.50981     | 2.22354   |
| TDO2      | -3.11289   | -1.76193  | 3.12254   | 3.15796   | -0.00196773 | 1.37014   |
| TDP1      | 4.51826    | 4.37871   | 3.04048   | 3.17658   | 4.06846     | 3.96394   |
| TDP2      | 3.3897     | 3.45303   | 3.81083   | 4.36386   | 4.37928     | 4.71218   |
| TDRD3     | 3.41075    | 3.35734   | 2.79376   | 2.68884   | 3.35928     | 3.60843   |
| TDRD7     | 2.66725    | 2.95079   | 3.18061   | 3.81599   | 3.14544     | 3.70268   |
| TDRKH     | 3.45558    | 3.43057   | 2.65192   | 2.92351   | 1.60666     | 1.63847   |
| TEAD1     | 6.80979    | 6.86316   | 6.78929   | 6.94744   | 7.10738     | 6.88365   |
| TEAD2     | 2.14643    | 1.9252    | 4.11108   | 3.92459   | 1.4996      | 1.38079   |
| TEAD3     | 1.76039    | 1.15192   | 2.18282   | 1.99449   | 0.427252    | -0.848487 |
| TEAD4     | 2.87079    | 2.66129   | 1.67449   | 2.23104   | 0.983605    | 1.20023   |
| TECPR1    | 3.30092    | 2.94655   | 3.4108    | 3.26621   | 3.7909      | 3.36475   |
| TECPR2    | 3.906      | 3.80954   | 2.72338   | 3.1273    | 3.56183     | 3.47493   |
| TECR      | 4.0016     | 3.74005   | 3.86691   | 4.04711   | 4.82909     | 4.55057   |
| TECRP1    | 3.48003    | 3.35355   | 3.4292    | 3.44965   | 4.23429     | 4.12412   |
| TEF       | 2.30093    | 2.16288   | 3.23433   | 3.41082   | 2.83555     | 2.7609    |
| TEFM      | 2.59535    | 2.74898   | 3.04039   | 3.11913   | 3.05236     | 3.6464    |
| TEKT4P2   | 1.9005     | 1.77904   | 2.24165   | 2.23051   | 2.71903     | 2.19842   |
| TELO2     | 1.8934     | 1.78036   | 2.16523   | 2.4799    | 1.82755     | 2.27058   |
| TEN1      | 1.60748    | 1.46515   | 0.735228  | 1.43871   | 2.63987     | 3.21934   |
| TEN1-CDK3 | 0.0467285  | 0.0320021 | 0.338133  | 0.233495  | 0.806002    | 0.123838  |
| TENM1     | 3.43974    | 3.41191   | -0.629682 | -0.786664 | -2.65941    | -3.38329  |
| TENM2     | -0.159773  | 0.151976  | 0.544485  | 0.350701  | 7.06964     | 7.27056   |
| TENM3     | 6.79656    | 6.549     | 6.20916   | 5.97143   | 6.65259     | 6.26509   |
| TEP1      | 3.55358    | 3.56229   | 3.0235    | 3.16497   | 3.06421     | 2.97629   |
| TERF1     | 3.62286    | 3.72809   | 4.14244   | 4.18172   | 3.92258     | 3.80597   |
| TERF1P4   | -0.224503  | 0.0307175 | 0.531129  | 0.364539  | 0.361095    | 0.197652  |
| TERF1P5   | 0.461822   | 0.263034  | 0.630284  | 0.58166   | 0.239936    | 0.450686  |
| TERF2     | 2.71032    | 2.66127   | 3.0308    | 3.31114   | 4.01564     | 3.92446   |
| TERF2IP   | 3.98928    | 4.66755   | 3.54592   | 4.57411   | 3.95687     | 5.45577   |
| TERT      | 1.28965    | 0.71714   | -2.27595  | -2.64851  | 0.373208    | -0.4586   |
| TESK1     | 1.63418    | 1.46793   | 2.02213   | 2.30987   | 2.94941     | 2.43796   |
| TESK2     | 2.04291    | 1.85173   | 2.2437    | 2.27644   | 1.06183     | 0.937209  |
| TET1      | 3.70179    | 3.40444   | 4.01123   | 3.59853   | 5.4964      | 4.48804   |
| TET2      | 4.92435    | 4.8432    | 5.938     | 5.72879   | 5.76492     | 5.44745   |
| TET3      | 5.08595    | 4.80335   | 4.71508   | 4.54759   | 5.09583     | 4.17746   |
| TEX10     | 4.98565    | 4.95341   | 4.44582   | 4.43709   | 4.35996     | 4.61859   |
| TEX15     | -6.68418 ? |           | -2.27595  | -3.52222  | 2.56129     | 2.72792   |
| TEX2      | 5.96135    | 6.07992   | 4.98951   | 5.17136   | 6.10848     | 6.23285   |
| TEX261    | 5.73061    | 5.67009   | 5.05163   | 5.36899   | 5.55226     | 5.46996   |
| TEX264    | 4.36433    | 4.33562   | 3.6729    | 3.95995   | 4.1503      | 4.50273   |
| TEX30     | 2.16513    | 2.22367   | 2.24695   | 2.67255   | 2.35093     | 3.12618   |



|                |           |           |            |           |           |           |
|----------------|-----------|-----------|------------|-----------|-----------|-----------|
| TEX9           | 1.61879   | 1.79623   | 0.244936   | -0.431676 | 1.62325   | 1.9399    |
| TF             | 2.75214   | 0.859151  | -3.37468   | -3.30006  | -5.07051  | -5.69922  |
| TFAM           | 5.40056   | 5.27267   | 4.85812    | 5.20404   | 5.95689   | 6.17131   |
| TFAP2A         | 2.55746   | 2.48554   | 3.89309    | 3.7785    | 3.57056   | 3.07728   |
| TFAP2C         | 5.58689   | 5.46121   | 3.03323    | 3.80257   | 4.42714   | 4.40311   |
| TFAP4          | 2.79878   | 2.45901   | 1.57806    | 1.96801   | 1.76178   | 1.92993   |
| TFB1M          | 3.10835   | 3.1468    | 2.82146    | 2.82282   | 3.61969   | 3.60606   |
| TFB2M          | 3.64841   | 3.70081   | 2.19153    | 2.71773   | 3.92183   | 4.73311   |
| TFCP2          | 3.42891   | 3.39515   | 3.26769    | 3.39698   | 3.40173   | 3.33221   |
| TFDP1          | 4.98537   | 4.96534   | 4.97847    | 5.34001   | 5.96991   | 5.82536   |
| TFDP2          | 3.68463   | 3.76357   | 4.62383    | 4.66265   | 4.4638    | 4.55772   |
| TFE3           | 4.69267   | 4.57334   | 4.3361     | 4.6037    | 4.2682    | 3.97277   |
| TFEB           | -0.323873 | -0.418273 | 1.11115    | 1.25754   | 1.58765   | 1.67702   |
| TFG            | 5.49536   | 5.40443   | 5.65961    | 5.74876   | 5.72958   | 5.47629   |
| TFIP11         | 4.55664   | 4.5631    | 3.82229    | 4.34832   | 4.15073   | 4.39812   |
| TFPI           | 4.39618   | 4.74286   | 6.36713    | 6.69686   | 4.17406   | 4.82757   |
| TFPI2          | 6.57192   | 6.89674   | 3.1541     | 3.42645   | 0.0812851 | -0.421131 |
| TFPT           | 1.79578   | 1.71326   | 1.65179    | 2.43313   | 2.22585   | 2.40824   |
| TFRC           | 8.36761   | 8.60884   | 8.44456    | 9.01013   | 9.69083   | 10.052    |
| TGDS           | 2.67814   | 2.61131   | 1.87179    | 1.98923   | 2.4031    | 2.92992   |
| TGFA           | 8.92855   | 9.10536   | -0.897866  | -1.06415  | 7.40824   | 6.92901   |
| TGFB1          | 3.23671   | 3.13439   | 3.93283    | 3.65946   | 3.73085   | 3.36634   |
| TGFB1I1        | 2.32884   | 2.41981   | 2.81084    | 3.20859   | 1.62974   | 1.88577   |
| TGFB2          | 1.47088   | 1.36995   | 7.11255    | 7.11619   | 5.62297   | 5.15186   |
| TGFB3          | 3.02175   | 3.04815   | -0.0134653 | -0.301307 | 3.28025   | 3.5027    |
| TGFBI          | 8.35073   | 8.29767   | 10.12      | 10.2669   | 10.4823   | 10.1137   |
| TGFBR1         | 5.54438   | 5.45638   | 4.07268    | 4.37801   | 4.05479   | 3.88013   |
| TGFBR2         | 5.41955   | 5.72202   | 5.76992    | 5.88375   | 5.63286   | 6.67994   |
| TGFBR3         | 3.89711   | 3.10321   | 4.11568    | 4.16264   | -1.26766  | -2.00571  |
| TGFBRAP1       | 4.48208   | 4.50797   | 3.4531     | 3.92183   | 4.81288   | 4.66615   |
| TGIF1          | 4.34531   | 4.28702   | 4.01737    | 4.34957   | 4.40105   | 4.61633   |
| TGIF2          | 5.00087   | 4.84336   | 3.9491     | 4.03072   | 4.44581   | 3.78156   |
| TGIF2-C20orf24 | 2.63392   | 2.54013   | 2.39576    | 2.2073    | 2.77316   | 2.3814    |
| TGM2           | 4.96533   | 5.44892   | 3.24064    | 3.06104   | -4.27913  | -5.69922  |
| TGOLN2         | 7.52434   | 7.41276   | 7.1329     | 7.33845   | 7.24469   | 7.19183   |
| TGS1           | 4.98043   | 4.88937   | 4.53076    | 4.68567   | 4.27534   | 4.41088   |
| THADA          | 5.31798   | 5.35133   | 4.7097     | 4.7653    | 5.21348   | 5.37675   |
| THAP1          | 2.64966   | 2.65091   | 1.95605    | 2.27057   | 2.72341   | 2.99719   |
| THAP10         | 0.587384  | 0.896272  | 0.864771   | 1.19464   | 0.372272  | 0.697436  |
| THAP11         | 3.98479   | 4.02298   | 3.60764    | 3.95995   | 4.68176   | 4.78513   |
| THAP2          | 1.34591   | 1.42655   | 1.60803    | 1.80736   | 1.85965   | 1.92977   |
| THAP3          | 2.3431    | 2.11446   | 2.35185    | 2.57952   | 2.92962   | 3.30026   |
| THAP4          | 3.88964   | 3.86695   | 3.60274    | 4.00491   | 4.41983   | 4.52089   |
| THAP5          | 4.95025   | 5.1853    | 4.2848     | 4.6183    | 4.83473   | 5.03782   |
| THAP6          | 2.759     | 2.79219   | 2.87492    | 3.02344   | 3.83583   | 3.94393   |
| THAP7          | 3.93302   | 3.68905   | 2.9406     | 3.17658   | 2.64804   | 3.14816   |
| THAP7-AS1      | 0.721075  | 0.64284   | 0.317675   | 0.149793  | -0.428453 | -0.105923 |
| THAP8          | -0.432112 | -0.39658  | 0.503064   | 0.711424  | 0.983605  | 1.1007    |
| THAP9          | 1.66805   | 1.44175   | 1.98417    | 1.73773   | 1.48992   | 1.52214   |
| THAP9-AS1      | 3.52621   | 3.67324   | 3.99666    | 4.31801   | 4.39648   | 4.63205   |
| THBS1          | 8.82173   | 9.17637   | 9.59822    | 9.92267   | 9.43202   | 9.12111   |
| THBS2          | 10.7829   | 10.2727   | -0.375995  | -0.327299 | 6.40005   | 6.21402   |

|             |           |           |           |           |          |          |
|-------------|-----------|-----------|-----------|-----------|----------|----------|
| THBS3       | 2.39082   | 2.16542   | 2.62146   | 2.54124   | 4.91301  | 4.58843  |
| THEM4       | 3.99939   | 4.14111   | 2.82129   | 3.06194   | 1.53651  | 1.94872  |
| THEM6       | 3.85071   | 3.67924   | 3.55288   | 3.64105   | 0.519683 | 1.03481  |
| THEMIS2     | 0.930336  | 0.90354   | 1.02599   | 1.24877   | 0.799187 | 0.247587 |
| THG1L       | 2.40946   | 2.2096    | 2.02595   | 2.16265   | 3.49577  | 3.07137  |
| THNSL1      | 2.66506   | 2.69451   | 1.91453   | 2.17196   | 1.80324  | 2.2763   |
| THOC1       | 3.9589    | 4.01697   | 4.11561   | 4.0994    | 4.5302   | 4.43539  |
| THOC2       | 6.39984   | 6.40676   | 6.51602   | 6.6415    | 7.01911  | 6.87864  |
| THOC3       | 3.50337   | 3.57661   | 4.17521   | 4.71032   | 3.84105  | 4.24199  |
| THOC5       | 5.69616   | 5.61329   | 4.49419   | 4.70093   | 4.99923  | 4.8969   |
| THOC6       | 2.53365   | 2.32352   | 1.88669   | 2.03923   | 1.84966  | 2.06958  |
| THOC7       | 3.85742   | 4.02097   | 3.55795   | 3.93008   | 3.66162  | 4.44175  |
| THOP1       | 4.41725   | 4.15737   | 3.9776    | 4.17773   | 4.67563  | 4.84787  |
| THRA        | 3.24776   | 2.90544   | 4.69186   | 4.77861   | 4.73709  | 4.10605  |
| THRAP3      | 6.8244    | 6.91082   | 6.60416   | 6.79261   | 7.18319  | 7.13688  |
| THRAP3P1    | 0.937608  | 1.25223   | 0.782627  | 1.0909    | 1.48481  | 0.923271 |
| THRB        | 1.75216   | 1.28539   | 3.19369   | 3.44959   | 3.89331  | 3.57638  |
| THSD1       | 0.897937  | 1.60232   | 0.200567  | 1.19043   | 0.116924 | 0.920766 |
| THSD4       | 4.09013   | 4.21046   | -0.825729 | -0.380732 | 2.16943  | 2.05486  |
| THTPA       | 2.12329   | 2.18039   | 1.34461   | 1.19065   | 2.08838  | 2.20796  |
| THUMPD1     | 5.00178   | 5.02147   | 4.8016    | 4.96798   | 5.03274  | 5.17973  |
| THUMPD2     | 2.46584   | 2.42287   | 1.7995    | 1.99972   | 2.87497  | 3.29047  |
| THUMPD3     | 5.08665   | 5.13064   | 4.28625   | 4.67209   | 5.11271  | 5.36898  |
| THUMPD3-AS1 | 4.0242    | 4.12855   | 4.11436   | 4.24884   | 4.27143  | 4.08876  |
| THY1        | -0.651253 | -0.413436 | 6.86341   | 7.08154   | 5.99471  | 6.23519  |
| THYN1       | 3.13855   | 3.12775   | 3.0453    | 3.47614   | 3.5196   | 4.05317  |
| TIA1        | 5.30444   | 5.21486   | 5.95952   | 5.78751   | 5.71527  | 5.42514  |
| TIAF1       | 1.49022   | 1.16691   | 3.08413   | 3.13062   | 2.09623  | 1.36743  |
| TIAL1       | 5.07074   | 5.10177   | 5.28357   | 5.14914   | 5.68896  | 5.46069  |
| TIAM1       | 4.42571   | 4.79867   | 3.20665   | 3.36488   | 3.49197  | 3.6813   |
| TIAM2       | 4.01848   | 3.76079   | 3.15513   | 3.28014   | 2.75606  | 2.30963  |
| TICAM1      | 1.4199    | 0.955067  | 0.156448  | 0.82198   | 2.04015  | 2.01441  |
| TICAM2      | -0.546825 | -0.394117 | 0.942631  | 0.91773   | 1.83571  | 1.56987  |
| TICRR       | 5.50096   | 5.22594   | 5.52535   | 5.37977   | 4.57599  | 3.5673   |
| TIFA        | 3.98987   | 4.18184   | 2.62384   | 3.046     | 3.21904  | 3.18852  |
| TIGAR       | 4.14011   | 4.21398   | 2.2002    | 2.65273   | 2.42185  | 2.74038  |
| TIGD1       | 2.77861   | 2.80009   | 2.67981   | 2.66055   | 2.0979   | 1.77336  |
| TIGD2       | 3.34803   | 3.52298   | 3.55961   | 3.77687   | 1.92843  | 2.24167  |
| TIGD5       | 2.30375   | 2.24453   | 2.25112   | 2.5059    | 2.10458  | 2.31567  |
| TIGD6       | 1.73377   | 1.60874   | 2.38617   | 2.70805   | 2.11385  | 2.18124  |
| TIGD7       | 2.61777   | 2.57609   | 1.81377   | 2.02464   | 2.15296  | 1.77954  |
| TIMELESS    | 4.67648   | 4.68371   | 4.62625   | 4.90099   | 4.69283  | 4.5245   |
| TIMM10      | 3.27534   | 3.11458   | 2.76193   | 3.33203   | 4.19687  | 4.73309  |
| TIMM10B     | 4.58033   | 4.60795   | 4.1501    | 4.32976   | 4.30473  | 4.46445  |
| TIMM13      | 3.90172   | 3.57196   | 2.94576   | 3.33618   | 4.59695  | 4.82661  |
| TIMM17A     | 5.48699   | 5.51977   | 4.87583   | 5.3855    | 5.62625  | 6.22769  |
| TIMM17B     | 3.25802   | 3.16469   | 3.27591   | 3.46851   | 3.27922  | 3.55537  |
| TIMM21      | 3.8284    | 3.86583   | 3.31831   | 3.5968    | 2.75121  | 2.52692  |
| TIMM22      | 3.24578   | 3.13875   | 3.38055   | 3.65544   | 3.84257  | 3.86896  |
| TIMM23      | 4.69331   | 4.77835   | 4.03775   | 4.64848   | 5.31241  | 5.78008  |
| TIMM23B     | 2.92206   | 2.84238   | 2.3394    | 2.43757   | 3.12906  | 2.84703  |
| TIMM44      | 3.54171   | 3.24452   | 3.02322   | 3.27055   | 4.29671  | 4.25329  |

|         |            |           |          |           |           |           |
|---------|------------|-----------|----------|-----------|-----------|-----------|
| TIMM50  | 4.5524     | 4.59987   | 4.16962  | 4.58552   | 4.86373   | 5.09902   |
| TIMM8A  | 2.95018    | 2.92302   | 2.24695  | 2.44961   | 3.65548   | 4.3329    |
| TIMM8B  | 2.19734    | 2.28662   | 3.47292  | 3.76943   | 4.74566   | 5.68979   |
| TIMM9   | 2.61324    | 2.57732   | 1.6023   | 1.64055   | 2.75563   | 3.15438   |
| TIMMDC1 | 4.50822    | 4.41392   | 4.41485  | 4.73716   | 4.63638   | 5.0202    |
| TIMP1   | 6.68859    | 6.69478   | 5.03624  | 5.30002   | 4.07271   | 4.42513   |
| TIMP2   | 7.52805    | 7.2763    | 7.18817  | 7.09856   | 7.51651   | 7.60549   |
| TIMP3   | 9.49528    | 9.27848   | 8.66406  | 9.12343   | 1.7406    | 1.58794   |
| TIMP4   | -6.68418 ? |           | 3.19802  | 3.41082   | 1.22848   | 2.32121   |
| TINAGL1 | 4.54408    | 5.01388   | 2.98139  | 3.60026   | -1.57243  | -0.577229 |
| TINF2   | 3.42633    | 3.58972   | 2.79662  | 3.2176    | 3.88078   | 4.21661   |
| TIPARP  | 5.80098    | 5.92459   | 5.84505  | 6.11729   | 3.74907   | 4.0515    |
| TIPIN   | 2.44998    | 2.51038   | 2.12357  | 2.61082   | 2.62215   | 3.1289    |
| TIPRL   | 5.38772    | 5.5033    | 4.49683  | 4.7738    | 5.51709   | 6.1675    |
| TIRAP   | 2.56021    | 2.45611   | 2.22875  | 2.40645   | 2.36561   | 2.14457   |
| TJAP1   | 3.36835    | 3.26848   | 3.19369  | 3.31744   | 3.58048   | 3.18507   |
| TJP1    | 5.88188    | 5.88839   | 5.5974   | 5.94543   | 5.1414    | 4.89783   |
| TJP2    | 5.09168    | 4.87087   | 3.70825  | 4.11155   | 3.33264   | 2.98329   |
| TK1     | 5.27496    | 5.11458   | 5.31981  | 5.80779   | 5.46284   | 5.58905   |
| TK2     | 2.49704    | 2.81051   | 2.84406  | 3.19276   | 3.15409   | 3.98802   |
| TKFC    | 2.97752    | 2.93759   | 2.9708   | 3.09163   | 2.06149   | 2.25596   |
| TKT     | 8.078      | 7.82318   | 8.32274  | 8.65687   | 9.94315   | 10.1846   |
| TLCD1   | 1.88215    | 2.22717   | 0.503064 | 0.999755  | 2.30837   | 3.18811   |
| TLCD2   | 0.847885   | 0.603321  | 3.05965  | 3.32372   | 1.53448   | 0.33778   |
| TLDC1   | 4.08056    | 4.25368   | 4.45302  | 4.88465   | 3.31828   | 3.28481   |
| TLDC2   | -0.0570314 | -0.444922 | 0.395699 | 0.32067   | 0.540434  | -0.696653 |
| TLE1    | 3.58837    | 3.38134   | 1.75127  | 1.26626   | 3.64067   | 3.46322   |
| TLE1P1  | 0.703747   | 0.442121  | -1.35947 | -1.58485  | 0.553596  | 0.176042  |
| TLE3    | 2.94117    | 2.6483    | 2.77068  | 2.83662   | 4.36344   | 3.8726    |
| TLE4    | 4.75521    | 4.92355   | 5.28661  | 4.96191   | 2.84348   | 3.07137   |
| TLK1    | 4.86115    | 4.80775   | 4.62785  | 4.54113   | 4.9071    | 5.09649   |
| TLK2    | 4.55434    | 4.50156   | 4.19923  | 4.41681   | 4.83537   | 4.88567   |
| TLK2P1  | 4.13015    | 4.1697    | 3.89895  | 4.08584   | 4.67261   | 4.54745   |
| TLL1    | -5.69162   | -3.13966  | 2.69913  | 2.1152    | -0.393347 | 0.270672  |
| TLN1    | 6.80921    | 6.75828   | 7.0659   | 7.27527   | 8.30851   | 8.28252   |
| TLN2    | 4.65179    | 4.88462   | 3.4108   | 3.44558   | 5.59627   | 4.98415   |
| TLR1    | -0.0220622 | -0.436203 | 0.398701 | -0.119261 | 1.24788   | 1.64876   |
| TLR3    | 1.32887    | 1.43806   | 2.68376  | 3.40293   | 2.02271   | 2.78114   |
| TLR4    | 4.72979    | 5.19981   | 5.26769  | 5.68477   | 5.8676    | 6.41287   |
| TLR6    | 3.20884    | 3.16981   | 2.59189  | 2.65761   | 3.63865   | 3.48617   |
| TLR7    | 2.25804    | 1.554     | -6.17309 | -5.10387  | -4.65668  | -4.11926  |
| TM2D1   | 3.42762    | 3.4782    | 3.65725  | 3.82043   | 3.94979   | 4.16826   |
| TM2D2   | 4.08228    | 3.98939   | 4.49331  | 4.69044   | 3.90953   | 4.14815   |
| TM2D3   | 4.34258    | 4.3928    | 3.79089  | 3.86988   | 4.45669   | 4.50639   |
| TM4SF1  | 4.48577    | 4.78924   | 6.97145  | 7.63859   | 5.10207   | 5.46944   |
| TM4SF19 | -0.908264  | -0.805694 | 0.44687  | 1.18069   | 1.86521   | 2.188     |
| TM7SF2  | 1.10187    | 0.885949  | 0.558032 | 0.749225  | 3.27633   | 3.57869   |
| TM7SF3  | 5.24528    | 5.45899   | 4.52037  | 5.00165   | 4.80728   | 5.41611   |
| TM9SF1  | 4.68295    | 4.61088   | 3.47606  | 3.70933   | 4.48648   | 4.56541   |
| TM9SF2  | 6.33948    | 6.39434   | 6.73216  | 7.14752   | 6.67814   | 7.05586   |
| TM9SF3  | 7.20569    | 7.33752   | 7.17759  | 7.39946   | 7.58195   | 7.66423   |
| TM9SF4  | 6.10135    | 5.99529   | 6.04826  | 6.24483   | 5.86793   | 5.50211   |

|               |           |          |           |           |            |          |
|---------------|-----------|----------|-----------|-----------|------------|----------|
| TMA16         | 3.6275    | 3.83522  | 3.00877   | 3.25093   | 3.16968    | 3.51125  |
| TMA16P2       | 0.518535  | 0.74491  | 0.0631578 | 0.176693  | -0.141255  | 0.113434 |
| TMA7          | 5.0428    | 5.02269  | 3.78051   | 3.92095   | 5.42808    | 5.92604  |
| TMBIM1        | 4.79728   | 4.72264  | 5.32574   | 5.75111   | 4.77898    | 4.85838  |
| TMBIM4        | 4.42569   | 4.57469  | 3.71584   | 3.98128   | 3.18831    | 4.51848  |
| TMBIM6        | 8.3654    | 8.50147  | 8.41458   | 8.89802   | 8.17401    | 8.3157   |
| TMC7          | 1.53298   | 1.59788  | -0.995207 | -0.860651 | 1.24663    | 0.702755 |
| TMCC1         | 2.92846   | 2.63519  | 3.22587   | 2.95457   | 5.14299    | 4.61747  |
| TMCC1-AS1     | 1.30659   | 1.49709  | 1.64927   | 1.82194   | 0.458435   | 0.560157 |
| TMCC2         | 0.701877  | 0.676782 | 0.747284  | 1.60545   | 2.1852     | 2.44812  |
| TMCO1         | 6.29212   | 6.33793  | 5.5153    | 5.83274   | 6.50245    | 6.91013  |
| TMCO3         | 4.81416   | 4.89579  | 5.0308    | 5.47236   | 4.89044    | 5.27556  |
| TMCO4         | 1.85554   | 1.74664  | 2.87718   | 3.53323   | 1.79093    | 2.75682  |
| TMCO6         | 2.63632   | 2.43803  | 2.0549    | 2.10551   | 0.615896   | 0.702755 |
| TMED1         | 3.24787   | 3.1848   | 3.06805   | 3.37383   | 4.10888    | 4.90497  |
| TMED10        | 7.48143   | 7.56959  | 6.39975   | 6.83951   | 7.10065    | 7.15668  |
| TMED10P1      | 1.1559    | 1.1081   | -0.556039 | -0.285012 | -0.0965714 | -1.09281 |
| TMED2         | 7.23869   | 7.27133  | 6.31991   | 6.80131   | 6.87673    | 7.17506  |
| TMED3         | 6.11886   | 6.05903  | 5.41826   | 5.88692   | 6.14019    | 6.88834  |
| TMED4         | 6.09803   | 6.20418  | 5.94507   | 6.3835    | 6.00499    | 6.07137  |
| TMED5         | 6.21125   | 6.06364  | 6.09254   | 6.1926    | 6.41793    | 6.11791  |
| TMED7         | 6.73033   | 7.00215  | 6.72559   | 7.30717   | 6.82259    | 7.15317  |
| TMED7-TICAM2  | 2.6431    | 2.61101  | 2.53113   | 3.0352    | 4.22984    | 4.13058  |
| TMED8         | 5.48299   | 5.3074   | 4.04889   | 4.30902   | 5.18439    | 4.93352  |
| TMED9         | 5.8507    | 5.78893  | 6.42266   | 6.76402   | 6.19359    | 6.51847  |
| TMEM100       | -0.891472 | -1.0363  | 4.09375   | 3.65438   | -5.65305   | -5.69922 |
| TMEM101       | 3.54171   | 3.45303  | 4.33314   | 4.64521   | 4.4983     | 4.66614  |
| TMEM102       | 0.219896  | 0.525929 | 0.208904  | 0.445854  | 0.384182   | 0.359476 |
| TMEM104       | 3.36161   | 3.10511  | 3.89462   | 3.98525   | 4.77381    | 4.46696  |
| TMEM106A      | 1.48583   | 1.25145  | 2.66824   | 2.65273   | 1.53448    | 1.0747   |
| TMEM106B      | 5.38273   | 5.36052  | 5.77429   | 5.82633   | 5.22309    | 5.23726  |
| TMEM106C      | 6.32863   | 6.14701  | 5.09898   | 5.53592   | 5.50866    | 5.95551  |
| TMEM107       | 2.71859   | 2.42803  | 3.63983   | 3.64481   | 2.4343     | 2.38795  |
| TMEM109       | 5.61092   | 5.65741  | 5.34981   | 5.71172   | 4.59885    | 4.26339  |
| TMEM11        | 2.65342   | 2.47674  | 2.87988   | 3.13535   | 3.41298    | 3.69249  |
| TMEM110       | 3.96197   | 3.96045  | 3.72278   | 3.98924   | 4.48545    | 4.3142   |
| TMEM110-MUSTN | 1.32576   | 1.12909  | 1.30169   | 0.996063  | 1.28914    | 0.591402 |
| TMEM115       | 4.95547   | 4.75877  | 4.19077   | 4.33113   | 5.06429    | 5.11895  |
| TMEM116       | 2.49076   | 2.63783  | 2.93283   | 3.04346   | 0.83161    | 0.893261 |
| TMEM117       | 2.48084   | 2.32833  | -2.48229  | -2.40763  | 0.351018   | 0.832517 |
| TMEM120A      | 2.33711   | 2.12589  | 2.50649   | 2.96264   | 2.73844    | 3.19717  |
| TMEM120B      | 4.28087   | 4.04635  | 3.56106   | 3.66094   | 4.34842    | 3.81685  |
| TMEM123       | 5.46678   | 5.83667  | 7.25182   | 7.60831   | 6.30903    | 6.68159  |
| TMEM126A      | 1.91565   | 1.766    | 2.7909    | 3.36488   | 2.66163    | 3.78514  |
| TMEM126B      | 2.50795   | 2.66645  | 3.43303   | 4.04472   | 3.35928    | 4.2961   |
| TMEM127       | 5.21529   | 5.21838  | 4.89261   | 5.18751   | 5.65624    | 5.68398  |
| TMEM128       | 1.83233   | 1.8272   | 1.97132   | 2.31296   | 2.72557    | 3.01439  |
| TMEM129       | 2.97158   | 2.8881   | 3.01861   | 3.25093   | 4.54974    | 4.91441  |
| TMEM130       | -5.69162  | -5.45651 | 3.24902   | 2.87702   | -4.07293   | -4.70296 |
| TMEM131       | 5.67079   | 5.57675  | 5.33856   | 5.38902   | 5.21237    | 4.99718  |
| TMEM132A      | 6.03942   | 5.82524  | 5.56405   | 5.84513   | 3.47357    | 3.35817  |
| TMEM132B      | -5.69162  | -6.45019 | 2.77938   | 2.73353   | -5.65305   | -4.11926 |

|                |            |           |           |           |            |           |
|----------------|------------|-----------|-----------|-----------|------------|-----------|
| TMEM133        | -1.48924   | -1.41808  | 2.05967   | 2.13437   | -3.85089   | -3.38329  |
| TMEM134        | 0.923035   | 1.08411   | 1.3479    | 1.38307   | 0.766027   | 1.02127   |
| TMEM135        | 3.61493    | 3.5301    | 4.05846   | 4.12957   | 4.3537     | 4.90338   |
| TMEM136        | 2.73138    | 2.91437   | 2.73833   | 3.04599   | 2.55402    | 2.7609    |
| TMEM138        | 3.78736    | 3.98716   | 3.55735   | 4.0405    | 3.60418    | 3.99988   |
| TMEM140        | 3.08528    | 3.04416   | 3.40927   | 3.38211   | 2.99063    | 2.91124   |
| TMEM141        | 2.14403    | 2.04893   | 2.43001   | 2.7618    | 1.82187    | 3.18403   |
| TMEM143        | -0.0550876 | -0.508457 | 0.914572  | 0.711424  | 0.0946955  | -0.280287 |
| TMEM144        | 1.19579    | 1.59247   | -6.17309  | -6.09892  | 2.78678    | 2.50275   |
| TMEM147        | 4.21381    | 4.23238   | 3.75605   | 4.30585   | 4.61334    | 5.12062   |
| TMEM147-AS1    | 2.77463    | 2.86808   | 3.08787   | 3.24432   | 2.73038    | 2.39133   |
| TMEM14A        | 2.74594    | 3.12587   | 2.68993   | 3.23547   | 3.31123    | 4.41998   |
| TMEM14B        | 4.4082     | 4.53615   | 4.53259   | 5.06158   | 4.88453    | 5.99852   |
| TMEM14C        | 4.63295    | 4.80158   | 4.96303   | 5.54939   | 4.71906    | 5.85887   |
| TMEM14D        | 0.775952   | 1.10272   | 0.528481  | 1.54388   | 1.14778    | 2.04648   |
| TMEM14E        | -0.840854  | -0.333394 | 1.12941   | 0.935626  | -0.0454657 | -0.95156  |
| TMEM150A       | 1.23171    | 1.18826   | 1.13846   | 1.40691   | 0.954457   | 0.736302  |
| TMEM154        | 2.55832    | 3.30864   | 1.84441   | 2.99447   | 3.91712    | 5.19716   |
| TMEM158        | 3.69001    | 4.18461   | 2.86633   | 3.80555   | 0.416602   | 1.55071   |
| TMEM159        | 0.0824028  | 0.331671  | 0.636738  | 1.10068   | -1.20056   | -0.799586 |
| TMEM161A       | 2.77869    | 2.282     | 2.82491   | 2.75537   | 3.51711    | 3.22107   |
| TMEM161B       | 4.44547    | 4.50437   | 5.1511    | 5.14433   | 5.83644    | 6.03077   |
| TMEM161B-AS1   | 2.14948    | 2.46495   | 2.94576   | 2.83363   | 4.18668    | 4.39785   |
| TMEM161BP1     | -0.912225  | -0.354151 | -0.316277 | 0.0846902 | 0.835067   | 1.1812    |
| TMEM164        | 4.20103    | 4.18822   | 5.72561   | 5.92626   | 4.77011    | 4.61069   |
| TMEM165        | 5.33778    | 5.37954   | 4.8547    | 5.19094   | 6.58093    | 7.06622   |
| TMEM167A       | 5.70608    | 5.61888   | 6.28193   | 6.43461   | 7.03595    | 6.81691   |
| TMEM167B       | 4.05013    | 4.16865   | 4.56857   | 4.9823    | 4.33575    | 4.76382   |
| TMEM168        | 4.26091    | 4.27693   | 3.10419   | 3.09085   | 4.47411    | 4.65303   |
| TMEM169        | 1.43024    | 1.70711   | 0.156448  | 0.383121  | -0.23389   | -0.31423  |
| TMEM17         | 1.17749    | 1.13712   | 0.793829  | 0.902467  | 0.270529   | 0.752791  |
| TMEM170A       | 4.14328    | 4.21749   | 3.87175   | 4.06702   | 3.2822     | 3.1325    |
| TMEM170B       | 4.27174    | 4.30534   | 1.31637   | 1.07114   | 4.27337    | 3.78913   |
| TMEM171        | 2.70821    | 2.77317   | 0.571454  | 1.4226    | -2.95876   | -3.12051  |
| TMEM173        | -2.69815   | -3.13966  | 3.63025   | 4.32579   | 2.04015    | 2.10066   |
| TMEM175        | 1.42508    | 1.15192   | 1.83331   | 2.08102   | 2.50461    | 2.31011   |
| TMEM177        | 3.32744    | 3.37636   | 2.03082   | 2.25313   | 2.47925    | 2.54597   |
| TMEM178B       | 2.88025    | 2.33806   | -1.93506  | -1.52346  | -2.75246   | -2.8983   |
| TMEM179B       | 4.24084    | 4.33605   | 3.41447   | 3.92187   | 4.09878    | 4.24937   |
| TMEM18         | 3.59337    | 3.43809   | 2.52648   | 2.74448   | 3.19188    | 3.44179   |
| TMEM180        | 1.38311    | 0.996642  | 0.893354  | 1.32585   | 1.35096    | 1.65087   |
| TMEM181        | 5.47895    | 5.51084   | 5.17512   | 5.35826   | 5.85267    | 5.5624    |
| TMEM182        | 1.05586    | 1.27191   | 1.51      | 1.92462   | 1.01923    | 1.28202   |
| TMEM183A       | 4.83071    | 4.89264   | 4.07373   | 4.42355   | 4.70002    | 5.29957   |
| TMEM184B       | 4.76801    | 4.6424    | 4.78874   | 4.97531   | 4.45147    | 4.07301   |
| TMEM184C       | 4.51706    | 4.54628   | 4.34493   | 4.66349   | 4.91947    | 4.81489   |
| TMEM185A       | 3.6626     | 3.59939   | 3.77771   | 3.89587   | 3.84939    | 3.67349   |
| TMEM185B       | 3.79076    | 3.71831   | 1.84993   | 1.79809   | 3.13086    | 2.85935   |
| TMEM186        | 2.19229    | 2.27297   | 1.53076   | 2.02562   | 2.09793    | 2.36476   |
| TMEM187        | 0.146525   | 0.382745  | 1.12031   | 1.10068   | 1.13416    | 1.57873   |
| TMEM189        | 5.08125    | 5.16557   | 4.70379   | 5.30125   | 5.42142    | 5.33312   |
| TMEM189-UBE2V1 | 2.19922    | 1.8217    | 1.43337   | 1.99483   | 2.45298    | 1.6764    |

|                |          |          |          |           |           |           |
|----------------|----------|----------|----------|-----------|-----------|-----------|
| TMEM19         | 4.18164  | 4.39455  | 3.80132  | 4.37095   | 3.5982    | 4.46774   |
| TMEM192        | 3.72403  | 3.65739  | 4.19043  | 4.60111   | 3.99252   | 4.26769   |
| TMEM198        | 1.54089  | 0.902992 | 1.27216  | 0.946514  | -0.115923 | -0.706491 |
| TMEM198B       | 1.85007  | 1.54747  | 2.1034   | 2.07208   | 0.230953  | 0.444741  |
| TMEM199        | 3.90769  | 4.00291  | 3.60266  | 4.07805   | 4.20603   | 4.59447   |
| TMEM2          | 8.2225   | 8.26645  | 6.53112  | 6.54532   | 7.8525    | 7.26985   |
| TMEM200C       | ?        | ?        | -1.18321 | -0.380732 | 1.13416   | 1.54125   |
| TMEM201        | 3.33984  | 3.30864  | 2.93802  | 3.05105   | 3.53198   | 3.39131   |
| TMEM203        | 3.7807   | 3.68436  | 3.20234  | 3.51139   | 3.79912   | 4.11665   |
| TMEM205        | 3.43663  | 3.16835  | 3.42047  | 3.77654   | 2.91922   | 3.52803   |
| TMEM206        | 3.95913  | 3.95817  | 3.26356  | 3.4515    | 3.76595   | 3.95328   |
| TMEM208        | 3.66396  | 3.75994  | 3.58796  | 4.23769   | 4.06164   | 4.77809   |
| TMEM209        | 5.06826  | 4.87187  | 4.56878  | 4.74508   | 5.37554   | 4.71952   |
| TMEM214        | 4.43662  | 4.40211  | 4.40987  | 4.58378   | 5.08284   | 4.93623   |
| TMEM218        | 3.24929  | 3.10891  | 3.35951  | 3.37498   | 2.62972   | 2.74038   |
| TMEM219        | 3.60013  | 3.6113   | 3.41266  | 3.76462   | 3.55401   | 4.00236   |
| TMEM222        | 4.03648  | 4.01592  | 3.53587  | 3.901     | 4.52207   | 4.51728   |
| TMEM223        | 3.55421  | 3.6541   | 2.84999  | 3.14378   | 3.84049   | 4.44137   |
| TMEM229B       | 2.26961  | 1.88148  | 1.53761  | 1.90243   | -3.19956  | -3.38329  |
| TMEM230        | 5.281    | 5.17885  | 5.66749  | 5.92971   | 6.1685    | 6.66705   |
| TMEM231        | 2.80972  | 2.90776  | 2.89322  | 3.08874   | 1.2586    | 1.35942   |
| TMEM234        | 2.72574  | 2.77339  | 2.73638  | 2.93953   | 3.07111   | 2.98258   |
| TMEM237        | 4.14716  | 4.31022  | 3.83215  | 4.14756   | 3.39028   | 3.86444   |
| TMEM241        | 2.30937  | 2.25827  | 2.01126  | 2.24434   | 1.44301   | 1.02127   |
| TMEM242        | 2.55596  | 2.97595  | 1.61741  | 1.92462   | 2.74058   | 3.11666   |
| TMEM243        | 3.54775  | 3.60095  | 3.78268  | 4.05728   | 3.41549   | 3.52715   |
| TMEM245        | 6.066    | 6.37655  | 6.23114  | 6.632     | 5.94654   | 6.36005   |
| TMEM246        | 2.88964  | 2.93591  | 2.8305   | 3.20859   | -5.65305  | -5.69922  |
| TMEM248        | 5.98061  | 6.01565  | 5.93348  | 6.20432   | 6.31692   | 6.20316   |
| TMEM25         | -1.94365 | -1.65505 | 1.63669  | 1.67911   | 1.62049   | 1.67702   |
| TMEM251        | 2.38732  | 2.35407  | 1.05494  | 0.773887  | 3.16068   | 3.24749   |
| TMEM254        | 1.27825  | 1.09944  | 0.150482 | 0.195058  | 0.706084  | 0.68568   |
| TMEM255A       | 2.18358  | 2.53435  | 1.7234   | 1.80409   | 0.373208  | 0.224139  |
| TMEM256        | 2.12112  | 2.33155  | 2.73141  | 3.01269   | 2.09048   | 3.10383   |
| TMEM256-PLSCR3 | 1.50063  | 1.60871  | 2.37995  | 2.81304   | 2.4091    | 2.39664   |
| TMEM258        | 4.41336  | 4.35176  | 3.48827  | 4.01531   | 3.81077   | 4.41073   |
| TMEM259        | 4.31144  | 4.16011  | 4.63185  | 4.70575   | 5.13813   | 4.81095   |
| TMEM260        | 3.3302   | 3.22015  | 2.4747   | 2.53864   | 2.37862   | 2.55539   |
| TMEM261        | 3.73034  | 3.57471  | 2.75312  | 2.92735   | 4.80423   | 5.87071   |
| TMEM262        | 1.84957  | 1.72962  | 1.45565  | 1.56739   | 1.09564   | 0.381605  |
| TMEM263        | 5.21801  | 5.33816  | 4.88928  | 5.28605   | 4.9785    | 5.01111   |
| TMEM30A        | 7.85318  | 8.10741  | 7.08115  | 7.37702   | 7.71244   | 7.83787   |
| TMEM33         | 6.23241  | 6.31336  | 5.60111  | 5.99607   | 7.07781   | 6.76648   |
| TMEM37         | -4.11163 | ?        | 2.29627  | 2.43422   | -3.85089  | -5.69922  |
| TMEM38A        | 2.49569  | 2.47086  | 1.43123  | 1.39901   | 1.08121   | 1.33772   |
| TMEM38B        | 3.52371  | 3.78507  | 3.36338  | 3.74759   | 3.4612    | 4.02799   |
| TMEM39A        | 4.00049  | 4.14909  | 4.41172  | 4.80105   | 3.94886   | 4.36474   |
| TMEM39B        | 2.21383  | 2.01291  | 2.58136  | 2.52781   | 2.42716   | 2.05486   |
| TMEM41A        | 3.76852  | 3.76469  | 3.78247  | 3.88473   | 4.58707   | 4.27004   |
| TMEM41B        | 4.93935  | 4.83176  | 5.55203  | 5.56536   | 5.2604    | 4.80701   |
| TMEM42         | 2.15581  | 2.20606  | 1.90926  | 1.83957   | 2.23755   | 2.78515   |
| TMEM43         | 6.25202  | 6.55553  | 5.39296  | 5.96631   | 5.42381   | 6.09374   |

|              |            |            |          |          |            |           |
|--------------|------------|------------|----------|----------|------------|-----------|
| TMEM44       | 1.98744    | 2.0956     | 3.64238  | 3.65355  | 2.76387    | 2.50029   |
| TMEM44-AS1   | 0.520176   | 0.370142   | 1.12031  | 1.41867  | 1.03324    | 1.53655   |
| TMEM45A      | 1.4458     | 0.832056   | 2.56143  | 2.89118  | 4.65685    | 3.31592   |
| TMEM47       | 5.09329    | 4.38887    | 1.51695  | 2.0561   | 1.7191     | 1.41227   |
| TMEM5        | 3.46834    | 3.60996    | 2.28817  | 2.71136  | 2.19458    | 2.9515    |
| TMEM50A      | 5.19185    | 5.28571    | 4.74547  | 5.0864   | 5.31556    | 5.48839   |
| TMEM50B      | 3.21125    | 3.08086    | 3.8088   | 4.09664  | 2.96536    | 3.18203   |
| TMEM51       | 2.15269    | 2.06466    | 2.55795  | 2.63265  | 1.50463    | 1.46325   |
| TMEM52B      | -6.68418 ? |            | 4.57552  | 4.66842  | -6.64581 ? |           |
| TMEM53       | 1.90708    | 1.79192    | 2.06045  | 2.01342  | 1.91844    | 1.97873   |
| TMEM54       | 2.08453    | 2.17184    | 2.33427  | 2.83599  | 0.799543   | 1.93841   |
| TMEM55A      | 1.8664     | 2.06325    | 3.06885  | 3.46608  | 2.71599    | 2.76858   |
| TMEM55B      | 3.457      | 3.28199    | 2.23012  | 2.54224  | 3.14866    | 3.54596   |
| TMEM56       | 4.00746    | 4.25206    | 3.77054  | 4.06476  | 4.16347    | 3.6927    |
| TMEM56-RWDD3 | 1.04432    | 1.11567    | 1.29536  | 1.13007  | 0.499976   | 0.862868  |
| TMEM57       | 4.21005    | 4.22277    | 4.36337  | 4.47988  | 4.23981    | 3.95506   |
| TMEM59       | 6.35754    | 6.29786    | 6.57342  | 6.9591   | 6.62234    | 7.17762   |
| TMEM60       | 2.82645    | 2.79691    | 3.00631  | 3.35266  | 2.91145    | 3.3781    |
| TMEM62       | 2.83502    | 2.82117    | 2.54406  | 3.08614  | 3.3592     | 4.14758   |
| TMEM63A      | 4.25074    | 4.21663    | 4.6853   | 4.66513  | 4.39089    | 3.70692   |
| TMEM63B      | 3.84973    | 3.6945     | 3.34785  | 3.79656  | 4.38475    | 4.0398    |
| TMEM64       | 4.37708    | 4.23498    | 5.32969  | 5.14559  | 5.33089    | 4.89226   |
| TMEM65       | 3.60013    | 3.59108    | 4.73533  | 4.9294   | 4.72122    | 3.71745   |
| TMEM67       | 2.82449    | 2.57883    | 3.31632  | 3.55117  | 3.49451    | 3.48804   |
| TMEM68       | 3.9626     | 3.55494    | 3.02825  | 2.71739  | 2.71107    | 2.28211   |
| TMEM69       | 4.18654    | 4.08784    | 3.60572  | 3.89372  | 3.95713    | 3.80081   |
| TMEM70       | 2.81012    | 2.88987    | 3.11339  | 3.54402  | 3.76818    | 4.28186   |
| TMEM75       | 2.28108    | 2.20959    | 2.00138  | 1.99448  | 1.5829     | 0.80115   |
| TMEM79       | 1.7099     | 1.50298    | 2.02787  | 2.41845  | 1.22848    | 1.0747    |
| TMEM80       | 1.98744    | 1.91222    | 3.15855  | 2.87986  | 2.45084    | 1.95865   |
| TMEM81       | 0.81669    | 0.570657   | 0.64945  | 0.399062 | 0.499649   | 0.224139  |
| TMEM86A      | 0.460879   | 0.060836   | 0.474784 | 0.924662 | -1.65987   | -1.38442  |
| TMEM87A      | 5.25992    | 5.04489    | 4.91619  | 5.16848  | 5.83145    | 6.07785   |
| TMEM87B      | 4.2522     | 4.66449    | 4.54098  | 5.1067   | 4.43244    | 5.11026   |
| TMEM8A       | 2.90458    | 2.66128    | 4.05368  | 3.97065  | 4.14784    | 4.00064   |
| TMEM8B       | 0.255223   | -0.0876659 | 0.699196 | 0.591699 | -0.43131   | -0.706491 |
| TMEM9        | 5.02158    | 4.62725    | 4.85743  | 4.91491  | 4.55276    | 4.63868   |
| TMEM97       | 5.31796    | 5.32995    | 5.10325  | 5.22475  | 4.81445    | 4.72996   |
| TMEM98       | 4.22943    | 4.14356    | -1.59814 | -1.40802 | -6.64581   | -5.69922  |
| TMEM99       | 2.09535    | 2.02501    | 2.33613  | 2.56007  | 3.09624    | 3.14504   |
| TMEM9B       | 3.39234    | 3.72817    | 3.67134  | 4.20405  | 4.12329    | 4.83727   |
| TMF1         | 5.58266    | 5.65204    | 5.3716   | 5.64151  | 5.65997    | 5.94538   |
| TMLHE        | 2.91682    | 2.8654     | 3.03518  | 2.89848  | 3.2624     | 3.62525   |
| TMOD1        | 1.53871    | 1.59029    | 2.26342  | 2.63527  | -1.64073   | 0.0904063 |
| TMOD2        | 4.20479    | 4.53926    | 3.42195  | 4.0023   | 2.36207    | 3.5003    |
| TMOD3        | 5.4576     | 5.64032    | 5.29016  | 5.66509  | 5.81714    | 5.8786    |
| TMPO         | 7.20827    | 7.46307    | 6.40494  | 6.69402  | 6.23991    | 6.34414   |
| TMPO-AS1     | 1.68424    | 1.29754    | 1.38521  | 1.35278  | 0.513319   | 0.292794  |
| TMPOP2       | 1.17648    | 1.4568     | 0.373008 | 0.750092 | 0.147163   | 0.0758886 |
| TMPPE        | 3.79177    | 3.47086    | 2.72338  | 2.46861  | 3.12641    | 2.59251   |
| TMPRSS15     | 3.079      | 2.93162 ?  |          |          | -1.90489   | -1.18284  |
| TMPRSS5      | -1.20691   | -1.2146    | -2.37543 | -2.20128 | 1.06767    | 1.43288   |

|           |           |           |           |            |            |            |
|-----------|-----------|-----------|-----------|------------|------------|------------|
| TMSB10    | 7.38338   | 7.65954   | 8.04609   | 8.65088    | 7.99894    | 8.60636    |
| TMSB15B   | 1.80391   | 1.77364   | 2.28692   | 2.34484    | 1.2021     | 1.64739    |
| TMSB4X    | 4.28446   | 4.26115   | 7.87297   | 7.95925    | 7.75411    | 8.62168    |
| TMSB4XP2  | -1.18099  | -1.49126  | -0.214083 | -0.0562692 | 1.75452    | 3.18225    |
| TMSB4XP4  | -1.53729  | -1.2173   | 0.842987  | 1.05611    | 1.01634    | 1.46405    |
| TMSB4XP6  | 0.389192  | 0.856261  | 4.27171   | 4.08981    | 4.15939    | 4.75523    |
| TMTC1     | 3.65075   | 3.22541   | 4.1214    | 4.1731     | 2.80322    | 2.65085    |
| TMTC2     | 5.80324   | 6.47062   | -0.568612 | -1.06415   | 1.46385    | 1.6942     |
| TMTC3     | 5.60611   | 5.99143   | 5.70557   | 6.00001    | 5.5473     | 6.47968    |
| TMTC4     | 3.65517   | 3.98423   | 1.85542   | 1.96266    | 3.4754     | 3.83244    |
| TMUB1     | 2.91011   | 2.60325   | 2.4164    | 2.68885    | 3.53445    | 3.51971    |
| TMUB2     | 3.54647   | 3.46493   | 4.25214   | 4.52143    | 4.41115    | 4.5269     |
| TMX1      | 6.05346   | 6.10649   | 5.25266   | 5.46953    | 6.64306    | 6.67559    |
| TMX2      | 5.5288    | 5.58709   | 5.61705   | 6.21399    | 6.10278    | 6.39107    |
| TMX2P1    | 3.0539    | 3.19676   | 3.15613   | 3.62961    | 4.11402    | 3.91561    |
| TMX3      | 6.36412   | 6.55447   | 6.17978   | 6.43856    | 5.64888    | 5.71271    |
| TMX4      | 6.15578   | 6.25974   | 5.76338   | 6.27621    | 5.84772    | 5.86313    |
| TNC       | 10.1761   | 10.0723   | 4.64777   | 5.33825    | 9.62749    | 8.82762    |
| TNFAIP1   | 4.77562   | 4.85457   | 4.54269   | 4.917      | 5.38543    | 5.4868     |
| TNFAIP2   | -0.791952 | -1.65505  | 4.69222   | 4.8627     | 5.64803    | 5.6431     |
| TNFAIP3   | 4.6241    | 4.61663   | 2.13842   | 2.44193    | 1.89813    | 1.4532     |
| TNFAIP6   | 2.28962   | 2.47086   | -2.09546  | -1.52346   | -0.217212  | 0.965773   |
| TNFAIP8   | 3.92389   | 4.21574   | 3.07387   | 3.36691    | 2.49958    | 2.40182    |
| TNFAIP8L1 | 3.61307   | 3.65067   | 2.29142   | 2.65578    | 3.53477    | 3.24449    |
| TNFRSF10B | 6.9892    | 6.73617   | 6.40003   | 6.41862    | 6.17181    | 5.38604    |
| TNFRSF11A | 1.95199   | 2.27526 ? |           | -6.09892   | -6.64581 ? |            |
| TNFRSF11B | 2.0083    | 2.32507   | 9.41944   | 9.75895    | -3.07415   | -1.89883   |
| TNFRSF12A | 5.52068   | 5.48951   | 4.4942    | 5.3557     | 6.22657    | 6.81664    |
| TNFRSF14  | -0.507753 | -0.142243 | 2.41982   | 2.53748    | -1.30241   | -0.0950158 |
| TNFRSF19  | 7.0501    | 6.84846   | 3.39391   | 3.5864     | 3.39226    | 3.76902    |
| TNFRSF1A  | 5.34872   | 5.05531   | 6.25861   | 6.28805    | 5.24545    | 5.13642    |
| TNFRSF21  | 3.63965   | 4.17559   | 4.82209   | 5.04408    | 3.08621    | 3.95862    |
| TNFRSF25  | -0.413499 | -0.513325 | 1.496     | 1.30394    | 1.69749    | 0.993783   |
| TNFRSF9   | 2.6206    | 2.82718   | 3.54099   | 3.86845    | 1.53448    | 1.66836    |
| TNFSF10   | -3.5275   | -3.46127  | 4.41079   | 3.9342     | 4.25855    | 4.44048    |
| TNFSF12   | 0.132879  | -0.142919 | 0.208904  | 0.296275   | 0.86336    | 1.48999    |
| TNFSF9    | 2.02545   | 2.11838   | -0.350462 | 0.724135   | -6.64581   | -5.69922   |
| TNIK      | 5.81267   | 5.84663   | 1.43123   | 1.17662    | 5.96309    | 5.35937    |
| TNIP1     | 4.63853   | 4.75813   | 5.21842   | 5.6523     | 5.3544     | 4.80108    |
| TNIP2     | 2.90084   | 2.89691   | 2.83885   | 3.36285    | 4.16464    | 4.57731    |
| TNK2      | 2.92326   | 2.66527   | 3.50661   | 3.37263    | 3.89829    | 3.59889    |
| TNKS      | 5.19475   | 5.29302   | 5.51493   | 5.59687    | 5.11574    | 5.19702    |
| TNKS1BP1  | 4.70925   | 4.56435   | 5.48137   | 5.59725    | 5.54976    | 5.1843     |
| TNKS2     | 5.38439   | 5.40404   | 5.09026   | 5.30109    | 6.00679    | 6.12696    |
| TNNT1     | 2.36971   | 2.42591   | 2.83608   | 3.35061    | -0.217212  | 1.71958    |
| TNPO1     | 7.43923   | 7.44158   | 7.92286   | 8.18795    | 8.38322    | 8.27847    |
| TNPO1P1   | 1.10207   | 1.24377   | 1.27708   | 1.49472    | 1.2518     | 1.22575    |
| TNPO1P2   | 1.78765   | 1.90917   | 2.23865   | 2.65519    | 2.5419     | 2.41988    |
| TNPO1P3   | 1.31668   | 1.64711   | 1.78473   | 2.20013    | 2.20494    | 2.08504    |
| TNPO2     | 5.31909   | 5.15645   | 4.47022   | 4.5123     | 5.33262    | 5.12141    |
| TNPO3     | 6.04451   | 6.03679   | 5.53586   | 5.8457     | 6.07753    | 5.93036    |
| TNRC18    | 3.85932   | 3.46341   | 4.9895    | 4.67414    | 3.19456    | 3.11024    |



|            |            |           |           |          |           |          |
|------------|------------|-----------|-----------|----------|-----------|----------|
| TNRC6A     | 5.86196    | 5.8054    | 6.488     | 6.63282  | 6.04297   | 5.82709  |
| TNRC6B     | 5.75238    | 5.78449   | 6.10331   | 6.15678  | 5.81767   | 5.70373  |
| TNRC6C     | 3.71689    | 3.73281   | 3.5932    | 3.68597  | 3.43958   | 3.16299  |
| TNS2       | 1.78692    | 0.871875  | 4.57085   | 4.46299  | 1.82535   | 1.1637   |
| TNS3       | 7.09114    | 7.03055   | 8.55592   | 8.5967   | 6.71393   | 6.96573  |
| TOB1       | 3.36814    | 3.03152   | 2.94242   | 3.14343  | 5.08999   | 4.89041  |
| TOB2       | 3.86115    | 4.10203   | 3.96419   | 4.18474  | 4.22288   | 4.13895  |
| TOE1       | 4.01449    | 3.86643   | 3.65446   | 4.12243  | 3.31553   | 3.27995  |
| TOLLIP     | 3.10828    | 2.86808   | 3.40519   | 3.77839  | 3.08284   | 3.35938  |
| TOM1       | 2.91011    | 2.58701   | 3.46933   | 3.83368  | 2.73416   | 2.82857  |
| TOM1L1     | 3.53345    | 3.66653   | 3.36915   | 3.87485  | 3.953     | 4.51217  |
| TOM1L2     | 3.63631    | 3.3732    | 3.96113   | 3.98788  | 5.63027   | 5.23065  |
| TOMM20     | 7.07483    | 7.158     | 6.53398   | 6.94018  | 7.53636   | 7.58126  |
| TOMM20P4   | 2.6111     | 2.74455   | 2.21286   | 2.65818  | 3.01074   | 3.33565  |
| TOMM22     | 5.93818    | 5.99555   | 5.15355   | 5.56491  | 5.76332   | 5.95056  |
| TOMM34     | 5.54111    | 5.59919   | 4.55625   | 5.10791  | 5.18791   | 5.33699  |
| TOMM40     | 4.99287    | 4.82257   | 4.7235    | 5.04677  | 5.21084   | 5.05958  |
| TOMM40L    | 3.74044    | 3.80234   | 3.25152   | 3.65099  | 3.55525   | 3.96846  |
| TOMM5      | 5.19978    | 5.37258   | 4.53871   | 4.95658  | 6.67337   | 7.76699  |
| TOMM6      | 5.10457    | 5.12215   | 4.00077   | 4.39494  | 5.50253   | 6.18984  |
| TOMM7      | 5.79521    | 5.52536   | 4.58466   | 5.0236   | 5.1486    | 5.91808  |
| TOMM70A    | 5.35127    | 5.48459   | 5.3804    | 5.81771  | 5.5883    | 6.01806  |
| TONSL      | 2.99963    | 2.76116   | 2.90924   | 3.03073  | 3.02093   | 2.61973  |
| TOP1       | 5.92775    | 5.82486   | 5.88289   | 5.87594  | 5.29932   | 5.19641  |
| TOP1MT     | 3.0658     | 2.88367   | 2.47113   | 2.38705  | 3.37036   | 2.91168  |
| TOP2A      | 7.89646    | 7.7791    | 8.18603   | 8.46481  | 8.02087   | 8.20288  |
| TOP2B      | 6.82575    | 6.81628   | 5.82806   | 5.99739  | 6.35947   | 6.27448  |
| TOP3A      | 4.56125    | 4.57126   | 4.56382   | 4.78977  | 5.09998   | 4.88853  |
| TOP3B      | 3.50298    | 3.35962   | 3.27899   | 3.51119  | 3.07127   | 2.76791  |
| TOPBP1     | 6.06579    | 6.0678    | 5.56801   | 5.88904  | 5.73868   | 5.88293  |
| TOPORS     | 4.91613    | 4.99246   | 4.48712   | 4.65936  | 5.97634   | 6.26053  |
| TOPORS-AS1 | 0.280885   | 0.0404015 | -0.194807 | -0.17462 | 0.82489   | 1.32287  |
| TOR1A      | 4.79178    | 4.9497    | 4.16299   | 4.61055  | 4.61698   | 5.19037  |
| TOR1AIP1   | 6.14717    | 6.35965   | 4.98513   | 5.42982  | 5.4732    | 5.65191  |
| TOR1AIP2   | 7.90285    | 7.93369   | 6.78566   | 7.02543  | 8.0538    | 7.82332  |
| TOR1B      | 4.41855    | 4.35812   | 3.74128   | 4.00621  | 4.40779   | 4.27912  |
| TOR2A      | 1.76447    | 1.27191   | 1.60441   | 1.65939  | 0.909612  | 1.4532   |
| TOR3A      | 4.13063    | 4.12773   | 4.31232   | 4.69449  | 4.02268   | 4.07792  |
| TOR4A      | -2.61075   | -2.46206  | 0.460428  | 0.248838 | 2.69284   | 2.46322  |
| TOX        | -4.69535   | -5.19307  | 0.497985  | 0.445854 | 1.98555   | 2.15113  |
| TOX2       | 0.00148521 | -0.158917 | 1.94062   | 1.81006  | -4.65668  | -4.70296 |
| TOX4       | 4.79369    | 4.88961   | 4.13254   | 4.55094  | 4.9089    | 5.14708  |
| TP53       | 3.68013    | 3.81443   | 4.35756   | 4.77914  | 4.60266   | 4.91329  |
| TP53BP1    | 6.08112    | 6.10086   | 6.23829   | 6.35524  | 6.31178   | 6.37088  |
| TP53BP2    | 5.25983    | 5.17286   | 4.9914    | 5.09329  | 5.05177   | 4.68881  |
| TP53I13    | 3.10989    | 2.80161   | 3.07873   | 3.22664  | 2.51213   | 2.50275  |
| TP53I3     | 2.2198     | 2.41944   | 1.62387   | 1.94104  | 2.19769   | 3.28764  |
| TP53INP1   | 2.44559    | 2.27188   | 3.23222   | 2.80706  | 3.45082   | 3.06148  |
| TP53INP2   | 2.24346    | 1.692     | 3.11111   | 2.85696  | 3.53201   | 3.49786  |
| TP53RK     | 4.5079     | 4.32261   | 3.63027   | 3.9892   | 4.62624   | 4.50152  |
| TP53TG1    | 0.0289651  | 0.265185  | 2.92762   | 3.55472  | 0.894341  | 2.24167  |
| TP53TG5    | 0.388278   | 0.190299  | 0.0600474 | 0.39858  | -0.174546 | -1.268   |

|              |           |           |           |            |            |          |
|--------------|-----------|-----------|-----------|------------|------------|----------|
| TP73         | 1.3978    | 1.39254   | 0.463382  | 0.279602   | 1.6467     | 0.946282 |
| TP73-AS1     | -3.84359  | -5.94425  | 3.38785   | 3.54979    | 3.60682    | 2.75424  |
| TPBG         | 4.82983   | 4.82428   | 3.55458   | 4.20745    | 4.70599    | 4.58904  |
| TPCN1        | 3.35214   | 2.70458   | 4.4729    | 4.49757    | 3.78573    | 3.52211  |
| TPCN2        | 3.48579   | 3.46048   | 2.81084   | 3.23547    | 3.52705    | 3.48311  |
| TPD52        | 3.95161   | 4.1931    | 1.48028   | 2.01739    | 5.40519    | 5.22768  |
| TPD52L1      | -0.721575 | -0.655276 | -2.5977   | -2.64851   | 2.70383    | 2.80899  |
| TPD52L2      | 6.0825    | 5.53043   | 5.44126   | 5.45009    | 5.96084    | 5.55771  |
| TPGS2        | 4.69235   | 4.54956   | 4.66077   | 4.91469    | 5.18506    | 5.19729  |
| TPH1         | 7.94217   | 8.00312   | 7.98872   | 8.56944    | 8.7099     | 8.79102  |
| TPH1P1       | 6.64819   | 6.73396   | 6.8032    | 7.27643    | 7.36786    | 7.50243  |
| TPK1         | 0.604783  | 1.09945   | -2.48229  | -2.02079   | -0.490197  | 1.43288  |
| TPM1         | 8.4433    | 8.62826   | 6.92217   | 7.23926    | 7.06772    | 7.22534  |
| TPM2         | 4.00655   | 3.86021   | 5.91976   | 6.33166    | 5.07313    | 5.07382  |
| TPM3         | 7.49398   | 7.66446   | 6.90689   | 7.44591    | 7.64325    | 7.8808   |
| TPM3P8       | 0.829127  | 0.985989  | 0.432543  | 0.857033   | 1.06915    | 1.03466  |
| TPM3P9       | 2.90713   | 2.94668   | 2.256     | 2.36872    | 1.86341    | 0.937774 |
| TPM4         | 6.73723   | 6.94043   | 7.0507    | 7.51265    | 8.0829     | 8.18364  |
| TPMT         | 3.33021   | 3.19894   | 2.99639   | 3.50956    | 4.74007    | 5.18743  |
| TPMTP1       | 0.133932  | 0.318612  | -0.229171 | 0.19507    | 1.9393     | 2.71061  |
| TPP1         | 4.74799   | 4.31605   | 4.49331   | 4.241      | 2.75544    | 2.64644  |
| TPP2         | 4.8313    | 4.85683   | 5.65449   | 5.97133    | 4.92886    | 5.26051  |
| TPPP         | 0.989989  | 0.655718  | 1.15465   | 1.04644    | -0.0605387 | -1.12145 |
| TPR          | 8.06248   | 8.12213   | 7.36505   | 7.61375    | 7.64706    | 7.65811  |
| TPRA1        | 3.19726   | 2.88589   | 3.56802   | 3.97996    | 2.34533    | 2.28199  |
| TPRG1        | -2.89397  | -2.6546   | -0.568612 | -1.20162   | 1.88661    | 2.28766  |
| TPRG1L       | 3.40026   | 2.97386   | 3.22798   | 3.26186    | 4.63715    | 4.4769   |
| TPRKB        | 3.75188   | 3.98197   | 3.07365   | 3.49031    | 3.9869     | 4.50143  |
| TPRN         | 1.91565   | 1.53154   | 1.36341   | 1.65939    | 1.60182    | 1.81688  |
| TPST1        | 4.68732   | 4.62196   | 5.28764   | 5.54267    | 4.79038    | 5.03053  |
| TPST2        | 2.49569   | 2.56507   | 2.94577   | 3.03073    | 2.55402    | 2.52212  |
| TPT1         | 8.78679   | 8.58045   | 8.34625   | 8.68157    | 9.04458    | 9.76939  |
| TPT1-AS1     | 2.04569   | 1.81783   | 2.43218   | 2.4131     | 1.82471    | 0.903655 |
| TPT1P4       | 1.5277    | 1.59982   | 1.25363   | 1.60375    | 1.84039    | 2.43875  |
| TPT1P9       | 3.57607   | 3.70174   | 3.51676   | 3.82881    | 4.20634    | 4.56651  |
| TPX2         | 7.43504   | 7.42949   | 6.91442   | 7.24095    | 6.72577    | 6.58421  |
| TRA2A        | 4.93935   | 4.92624   | 5.27846   | 5.2176     | 5.0727     | 4.59363  |
| TRA2B        | 7.30786   | 7.28007   | 7.36431   | 7.4135     | 7.67489    | 7.64298  |
| TRABD        | 2.69969   | 2.43215   | 3.17135   | 3.17954    | 2.84802    | 2.46663  |
| TRABD2A      | -0.865939 | -0.818747 | 2.53759   | 3.11518    | -1.41201   | -1.24695 |
| TRABD2B      | 2.08193   | 2.51792   | -3.18222  | -3.52222 ? | ?          |          |
| TRADD        | 0.470938  | 0.223769  | 2.11571   | 2.39103    | 2.55159    | 3.15438  |
| TRAF1        | 2.95377   | 3.98112   | -0.276471 | 1.14861    | 1.40043    | 2.23582  |
| TRAF2        | 3.64077   | 3.46493   | 2.98641   | 2.98129    | 2.56129    | 2.46823  |
| TRAF3        | 5.02459   | 5.05432   | 3.63666   | 3.93557    | 4.10206    | 4.01609  |
| TRAF3IP1     | 3.43791   | 3.34772   | 3.35564   | 3.5022     | 3.56971    | 2.71956  |
| TRAF3IP2     | 2.79678   | 2.63783   | 3.08234   | 3.21985    | 2.98792    | 3.12739  |
| TRAF3IP2-AS1 | 0.693311  | 0.514521  | 0.976408  | 0.845438   | 1.19149    | 0.578775 |
| TRAF4        | 5.07602   | 4.79858   | 4.1985    | 4.23704    | 5.42925    | 5.19615  |
| TRAF5        | 3.95286   | 3.9241    | 3.38253   | 2.89399    | 3.38818    | 2.56942  |
| TRAF6        | 2.67278   | 2.65782   | 2.6232    | 2.66799    | 3.52623    | 3.34442  |
| TRAF7        | 4.38698   | 4.23142   | 4.55362   | 4.68635    | 5.00941    | 4.96474  |

|           |           |           |           |          |           |            |
|-----------|-----------|-----------|-----------|----------|-----------|------------|
| TRAFD1    | 3.63297   | 3.61398   | 4.45491   | 4.96328  | 3.26005   | 3.47071    |
| TRAIP     | 3.01173   | 3.05876   | 2.34006   | 2.56007  | 2.76806   | 2.94793    |
| TRAK1     | 4.63631   | 4.57194   | 4.26562   | 4.20405  | 5.75751   | 5.38669    |
| TRAK2     | 5.44444   | 5.3776    | 5.03315   | 5.39763  | 5.96968   | 6.37813    |
| TRAM1     | 6.00676   | 6.01649   | 6.86186   | 7.41487  | 6.40682   | 6.73388    |
| TRAMIL1   | 1.0158    | 1.07637   | -0.252626 | 0.176693 | -0.216981 | 0.0483059  |
| TRAM2     | 6.40305   | 6.32525   | 7.2228    | 7.30611  | 6.84499   | 6.37842    |
| TRAM2-AS1 | 1.07576   | 0.859151  | 1.07392   | 1.03078  | 0.782702  | 1.29334    |
| TRANK1    | 3.54171   | 3.75752   | 4.46931   | 4.67743  | 4.112     | 4.45567    |
| TRAP1     | 5.56013   | 5.34676   | 5.03137   | 5.26258  | 4.73759   | 4.50209    |
| TRAPPC1   | 3.44175   | 3.3103    | 3.72637   | 3.92185  | 4.42316   | 4.3741     |
| TRAPPC10  | 4.56106   | 4.6801    | 5.1461    | 5.41916  | 5.07718   | 4.88287    |
| TRAPPC11  | 4.11549   | 4.08885   | 4.23116   | 4.39995  | 4.28074   | 4.60048    |
| TRAPPC12  | 3.67705   | 3.66127   | 3.16078   | 3.22209  | 4.08367   | 3.96571    |
| TRAPPC13  | 3.50435   | 3.4646    | 3.98029   | 3.98545  | 4.21387   | 4.60089    |
| TRAPPC2   | 1.88904   | 1.9895    | 2.44447   | 2.60936  | 2.59623   | 2.08257    |
| TRAPPC2B  | 2.1582    | 2.15797   | 1.81187   | 2.08149  | 2.69265   | 3.34616    |
| TRAPPC2L  | 3.82448   | 3.70331   | 3.55288   | 3.87701  | 3.20697   | 3.75272    |
| TRAPPC3   | 4.53932   | 4.54278   | 3.88121   | 4.39995  | 4.79859   | 5.17898    |
| TRAPPC4   | 4.58777   | 4.82428   | 3.71888   | 4.22479  | 4.26073   | 4.91079    |
| TRAPPC5   | 1.66378   | 1.34645   | 1.22363   | 1.62027  | 2.31135   | 3.21186    |
| TRAPPC6B  | 3.40553   | 3.52867   | 2.67447   | 3.04092  | 3.7512    | 4.0465     |
| TRAPPC8   | 4.94761   | 4.98756   | 4.41517   | 4.68213  | 3.75288   | 4.10699    |
| TRAPPC9   | 2.97688   | 2.8903    | 3.52038   | 3.26186  | 2.61116   | 2.36476    |
| TRDMT1    | 3.26959   | 3.17197   | 2.16522   | 2.15329  | 3.52332   | 3.44557    |
| TRERF1    | 3.12429   | 3.04891   | 4.23853   | 4.18808  | 2.94703   | 2.72792    |
| TREX1     | 2.35259   | 2.59746   | 2.84554   | 3.32993  | 2.93056   | 3.3033     |
| TRHDE     | 2.46809   | 2.95866   | 2.69563   | 3.58582  | -5.07051  | -4.11926   |
| TRHDE-AS1 | 1.51578   | 1.74795   | 2.25172   | 2.50345  | -4.07293  | -5.69922   |
| TRIAP1    | 3.77158   | 3.74903   | 2.70219   | 3.03838  | 3.66836   | 4.20766    |
| TRIB1     | 4.62735   | 4.51942   | 3.84576   | 4.34238  | 2.55887   | 2.1262     |
| TRIB2     | 5.98369   | 5.6907    | 5.36769   | 5.05229  | 6.55472   | 5.97321    |
| TRIB3     | 3.41727   | 3.31852   | 3.74573   | 4.44767  | 3.64004   | 3.83825    |
| TRIM11    | 4.08637   | 4.01692   | 3.71734   | 3.92459  | 4.14219   | 3.95862    |
| TRIM13    | 4.90836   | 4.92297   | 4.79324   | 4.80869  | 4.69435   | 4.70146    |
| TRIM14    | 2.55832   | 2.64406   | 3.41824   | 3.47425  | 3.47713   | 2.99244    |
| TRIM16    | 4.54013   | 4.48588   | 6.60843   | 6.75853  | 6.25601   | 6.1556     |
| TRIM16L   | 3.63167   | 3.38358   | 6.49629   | 6.49655  | 6.19967   | 5.90718    |
| TRIM17    | 0.0289651 | -0.036446 | 0.956086  | 0.810106 | 0.32848   | -0.0918635 |
| TRIM2     | 7.03407   | 6.86192   | 4.67678   | 4.93418  | 7.67066   | 7.55677    |
| TRIM21    | 1.60474   | 1.9035    | 2.94834   | 3.47048  | 2.4351    | 2.78915    |
| TRIM22    | 2.22993   | 2.62992   | 4.14515   | 4.4049   | 3.89906   | 3.79711    |
| TRIM23    | 3.68786   | 3.7827    | 4.04769   | 4.45151  | 4.34391   | 4.93533    |
| TRIM24    | 4.3824    | 4.3732    | 3.75752   | 3.73666  | 4.77327   | 4.57058    |
| TRIM25    | 5.46551   | 5.55393   | 5.14515   | 5.44479  | 5.91569   | 5.73311    |
| TRIM26    | 3.68787   | 3.74051   | 4.11683   | 4.49201  | 4.46445   | 4.32118    |
| TRIM27    | 5.13182   | 5.1324    | 4.54184   | 4.77915  | 5.32125   | 5.61295    |
| TRIM28    | 6.47614   | 6.41902   | 5.9697    | 6.22039  | 6.74109   | 6.89943    |
| TRIM3     | 3.6857    | 3.7969    | 2.49948   | 2.7677   | 2.46898   | 2.56476    |
| TRIM32    | 3.92206   | 3.91219   | 3.59783   | 3.75845  | 3.72015   | 3.70479    |
| TRIM33    | 5.65709   | 5.78182   | 5.59496   | 5.67376  | 5.59204   | 5.27484    |
| TRIM34    | 0.438729  | 0.786655  | 2.53963   | 2.85412  | 0.444519  | 0.635782   |

|            |          |          |          |           |           |           |
|------------|----------|----------|----------|-----------|-----------|-----------|
| TRIM35     | 3.43535  | 3.39046  | 2.76485  | 3.081     | 3.07947   | 3.10707   |
| TRIM36     | 1.72301  | 1.53719  | 0.558032 | 1.0909    | 0.578176  | 0.541297  |
| TRIM37     | 5.29791  | 5.25808  | 4.87306  | 5.17108   | 6.12637   | 6.16481   |
| TRIM38     | 3.96002  | 3.80511  | 4.58796  | 4.86773   | 4.32125   | 4.31237   |
| TRIM39     | 2.59044  | 2.6282   | 2.53531  | 2.66265   | 3.49508   | 3.1561    |
| TRIM4      | 3.79578  | 3.79099  | 4.20233  | 4.49201   | 4.47798   | 4.58675   |
| TRIM41     | 3.75583  | 3.77165  | 4.24357  | 4.44893   | 4.45573   | 3.99323   |
| TRIM44     | 5.91746  | 5.88891  | 5.88491  | 5.94272   | 6.70122   | 6.41481   |
| TRIM45     | 1.88966  | 1.96344  | 2.16079  | 1.86274   | 3.61116   | 3.54831   |
| TRIM46     | 1.00834  | 1.05291  | 0.191626 | 0.95732   | -0.637731 | -0.799586 |
| TRIM47     | 3.34267  | 3.65026  | 2.5839   | 3.23906   | 3.3176    | 3.92215   |
| TRIM5      | 3.27391  | 3.4782   | 4.30331  | 4.57239   | 3.18361   | 3.36743   |
| TRIM52     | 3.36195  | 3.50672  | 4.58814  | 4.60395   | 3.96999   | 3.35159   |
| TRIM52-AS1 | 0.987037 | 0.813155 | 1.34468  | 1.28065   | 1.47696   | 0.889894  |
| TRIM56     | 5.05997  | 5.0355   | 5.73421  | 5.85764   | 5.26561   | 4.77003   |
| TRIM59     | 3.08482  | 3.28877  | 3.90206  | 3.94071   | 3.11624   | 2.61171   |
| TRIM6      | 0.768697 | 1.23054  | 0.940264 | 1.59447   | -3.51607  | -3.99627  |
| TRIM62     | 0.50068  | 0.503023 | 2.55795  | 2.6856    | 1.77435   | 1.56011   |
| TRIM65     | 4.40617  | 4.50149  | 3.25319  | 3.61056   | 3.7427    | 3.8932    |
| TRIM66     | 3.09859  | 2.9122   | 3.48358  | 3.40885   | 2.60414   | 1.90064   |
| TRIM68     | 2.34805  | 2.53717  | 2.32429  | 2.62928   | 1.47928   | 1.43287   |
| TRIM69     | 2.43022  | 2.38892  | 2.70523  | 2.93284   | 3.40981   | 3.9657    |
| TRIM7      | 0.508388 | 0.623417 | 0.944011 | 1.61123   | 0.495327  | 0.941707  |
| TRIM8      | 3.34941  | 3.13707  | 3.18061  | 3.48922   | 3.68288   | 3.38604   |
| TRIM9      | 3.6943   | 3.16651  | 0.27602  | -0.177939 | 3.61115   | 3.2358    |
| TRIML2     | 3.8097   | 3.20782  | -1.32519 | -2.93781  | -6.64581  | -5.69922  |
| TRIO       | 7.17559  | 7.35743  | 7.39888  | 7.66798   | 7.75666   | 7.49232   |
| TRIOBP     | 4.99972  | 4.701    | 4.75755  | 4.80218   | 3.75437   | 3.85857   |
| TRIP10     | 3.67039  | 3.64696  | 3.81209  | 4.14123   | 4.19595   | 4.38602   |
| TRIP11     | 5.72     | 5.72321  | 5.11617  | 5.27103   | 5.5334    | 5.75999   |
| TRIP12     | 7.58849  | 7.56989  | 7.60978  | 7.75579   | 8.29763   | 8.18599   |
| TRIP13     | 5.16007  | 5.10225  | 4.01245  | 4.42547   | 5.43967   | 5.53348   |
| TRIP4      | 2.5201   | 2.50295  | 2.541    | 2.64607   | 2.65711   | 3.06478   |
| TRIP6      | 4.24343  | 4.1051   | 3.56467  | 4.02816   | 5.07227   | 5.59076   |
| TRIQK      | 2.7082   | 3.0406   | 2.53759  | 3.02817   | 1.79915   | 2.57407   |
| TRIT1      | 3.34533  | 3.24624  | 2.96877  | 3.01788   | 3.83754   | 3.86504   |
| TRMT1      | 3.12906  | 2.99249  | 2.5273   | 2.72407   | 3.41646   | 3.32947   |
| TRMT10A    | 1.57242  | 1.61934  | 1.7294   | 1.62592   | 1.96907   | 2.10709   |
| TRMT10B    | 2.15581  | 2.19181  | 1.95605  | 1.96801   | 3.52952   | 3.23287   |
| TRMT10C    | 4.21307  | 4.36844  | 3.22375  | 3.54042   | 3.81442   | 4.59136   |
| TRMT11     | 3.17897  | 3.11647  | 2.59128  | 2.76155   | 3.79399   | 4.35397   |
| TRMT112    | 6.03418  | 5.98829  | 4.74571  | 4.96977   | 5.80009   | 6.21966   |
| TRMT112P6  | 3.02963  | 3.02248  | 1.74482  | 2.00268   | 2.8127    | 3.13003   |
| TRMT12     | 3.28961  | 3.39046  | 2.69913  | 3.19267   | 3.74589   | 3.81292   |
| TRMT13     | 3.76182  | 3.99447  | 3.31275  | 3.28205   | 3.83336   | 3.72017   |
| TRMT1L     | 3.94747  | 4.10225  | 3.67446  | 3.85696   | 3.85045   | 4.48434   |
| TRMT2A     | 4.42887  | 4.29264  | 3.8715   | 4.11684   | 3.50798   | 3.53988   |
| TRMT2B     | 3.27534  | 3.36212  | 3.342    | 3.75536   | 3.74377   | 3.90062   |
| TRMT44     | 2.97335  | 2.75148  | 2.47827  | 2.63265   | 2.85145   | 2.57407   |
| TRMT5      | 4.18466  | 4.34435  | 3.20807  | 3.36445   | 3.48678   | 3.84942   |
| TRMT6      | 4.16123  | 4.32748  | 3.59783  | 4.07729   | 4.99301   | 5.0101    |
| TRMT61A    | 2.69754  | 2.37321  | 1.33222  | 1.79206   | 2.54182   | 2.90431   |

|             |           |           |            |              |           |           |
|-------------|-----------|-----------|------------|--------------|-----------|-----------|
| TRMT61B     | 2.97185   | 2.99321   | 2.35149    | 2.69362      | 2.80687   | 2.81694   |
| TRMU        | 4.90824   | 4.87477   | 4.87514    | 5.11335      | 4.30041   | 4.16211   |
| TRNAU1AP    | 3.29951   | 3.2887    | 2.71433    | 3.13435      | 3.56128   | 3.80108   |
| TRNP1       | 1.82058   | 2.04497   | -0.095919  | 0.672606     | 0.32848   | 0.560157  |
| TRNT1       | 4.11809   | 4.11391   | 3.30105    | 3.50952      | 4.07113   | 4.35278   |
| TRO         | 4.24254   | 4.11269   | 3.73236    | 3.73823      | 0.740643  | 0.650921  |
| TROAP       | 4.79277   | 4.66572   | 4.10523    | 4.4068       | 3.56128   | 3.4607    |
| TROVE2      | 6.78715   | 6.8768    | 6.02157    | 6.26032      | 6.83341   | 6.71027   |
| TRPA1       | -2.02658  | -2.31171  | 3.70173    | 4.28295 ?    | ?         |           |
| TRPC1       | 2.59555   | 2.84094   | 4.00383    | 4.13314      | 2.45345   | 2.73208   |
| TRPC3       | -0.816197 | -0.790185 | 2.57804    | 2.65937      | -0.753191 | -0.38461  |
| TRPC4AP     | 5.69242   | 5.7192    | 5.69183    | 6.04721      | 5.57239   | 5.86215   |
| TRPM2       | 1.09539   | 0.938098  | -2.86056   | -2.30078 ?   | ?         |           |
| TRPM3       | 2.25513   | 1.78985   | 1.25116    | 1.4458       | 2.48436   | 2.43285   |
| TRPM4       | 0.776727  | 0.444137  | 1.20884    | 0.89124      | -1.85245  | -2.12114  |
| TRPM7       | 6.20062   | 6.35409   | 5.76631    | 6.25253      | 6.00505   | 6.63284   |
| TRPM8       | 2.92456   | 2.34096   | -0.0336419 | 0.213217     | -0.43131  | -0.619042 |
| TRPS1       | 5.57734   | 5.40095   | 2.16522    | 1.8512       | 8.14013   | 7.80365   |
| TRPT1       | 2.64078   | 2.58429   | 2.41268    | 2.65937      | 2.82955   | 2.80505   |
| TRPV1       | 0.979111  | 1.22321   | 0.118253   | -0.000595956 | 1.55556   | 0.850631  |
| TRPV4       | 3.36027   | 3.81095   | -2.5977    | -4.10635 ?   | ?         |           |
| TRRAP       | 6.70519   | 6.63638   | 7.00537    | 6.94725      | 6.16722   | 5.77811   |
| TRUB1       | 3.7511    | 3.96551   | 3.51518    | 3.88553      | 4.32552   | 4.34177   |
| TRUB2       | 4.68507   | 4.65131   | 3.60578    | 4.11008      | 4.66298   | 5.06508   |
| TSC1        | 4.45066   | 4.42589   | 4.88324    | 4.9773       | 4.67451   | 4.38736   |
| TSC2        | 4.01001   | 4.00985   | 4.38465    | 4.50588      | 4.90716   | 5.08852   |
| TSC22D1     | 5.90194   | 5.87012   | 5.46528    | 5.61318      | 5.90958   | 5.68804   |
| TSC22D2     | 3.55004   | 3.51729   | 5.34736    | 5.09634      | 5.42084   | 4.66832   |
| TSC22D3     | 1.27251   | 1.12217   | 4.12596    | 4.43709      | 1.74486   | 1.99375   |
| TSC22D4     | 2.9218    | 2.57334   | 2.71434    | 3.11626      | 3.42285   | 3.51003   |
| TSEN15      | 4.29132   | 4.38471   | 3.72781    | 4.03916      | 4.12625   | 4.61792   |
| TSEN2       | 3.56888   | 3.56208   | 3.11569    | 3.09085      | 3.0262    | 3.01097   |
| TSEN34      | 3.88117   | 3.87032   | 3.95856    | 4.28455      | 4.55036   | 4.98588   |
| TSEN54      | 2.57239   | 2.52301   | 2.65254    | 2.71773      | 2.82553   | 3.12301   |
| TSFM        | 3.22539   | 3.12323   | 2.88446    | 3.39949      | 3.13338   | 3.51066   |
| TSG101      | 4.14005   | 4.11347   | 3.40414    | 3.66487      | 4.52081   | 4.90013   |
| TSGA10      | 0.356302  | 0.292146  | 0.558032   | 0.334214     | 1.95442   | 1.91536   |
| TSHZ1       | 4.2287    | 4.0927    | 3.12936    | 3.29205      | 2.87692   | 2.66833   |
| TSHZ2       | 1.06916   | 1.09179   | 1.30034    | 1.42696      | -6.64581  | -5.69922  |
| TSHZ3       | ?         | ?         | 3.29221    | 3.33618      | 0.234612  | 0.893261  |
| TSKU        | 4.3897    | 4.36608   | 4.78296    | 4.77381      | 1.58765   | 0.832509  |
| TSLP        | -2.30606  | -1.87737  | 1.36341    | 1.42259 ?    | ?         |           |
| TSN         | 5.93686   | 6.07486   | 5.00134    | 5.49387      | 5.43243   | 5.8363    |
| TSNARE1     | 0.62293   | 0.151976  | 0.0260635  | 0.367002     | 0.688494  | 1.12623   |
| TSNAX       | 5.42607   | 5.68509   | 4.64485    | 4.99601      | 5.52543   | 5.66212   |
| TSNAX-DISC1 | 0.461874  | 0.911331  | 1.36602    | 0.262385     | -0.239256 | -1.7239   |
| TSPAN11     | 3.99179   | 3.96026   | 0.912765   | 0.659431     | -3.19956  | -2.70579  |
| TSPAN12     | 2.72509   | 2.77557   | 1.48185    | 1.18585      | -6.64581  | -5.69922  |
| TSPAN13     | 6.23126   | 6.34127   | 0.597917   | 1.40691      | 2.76806   | 2.50275   |
| TSPAN14     | 4.55653   | 4.59514   | 4.20734    | 4.30902      | 4.5745    | 4.39788   |
| TSPAN15     | 0.183671  | 0.444137  | 0.584741   | 0.749225     | 4.09039   | 4.80898   |
| TSPAN17     | 3.62172   | 3.81909   | 4.69375    | 5.14206      | 4.54303   | 4.95861   |

|           |           |          |            |           |           |           |
|-----------|-----------|----------|------------|-----------|-----------|-----------|
| TSPAN2    | -4.37417  | -3.65369 | 0.805235   | 1.04098   | 2.47669   | 2.5925    |
| TSPAN3    | 6.95559   | 6.31725  | 6.38777    | 6.39126   | 6.55248   | 6.07748   |
| TSPAN31   | 3.26988   | 3.17985  | 3.99051    | 4.17448   | 3.60445   | 3.7577    |
| TSPAN33   | 3.00828   | 2.59786  | 0.225978   | -0.616766 | 0.997957  | 0.0483059 |
| TSPAN4    | 4.48641   | 3.898    | 4.8886     | 4.90867   | 2.93589   | 3.40181   |
| TSPAN5    | 3.95733   | 4.05874  | 4.07267    | 4.25749   | 4.7293    | 5.21289   |
| TSPAN6    | 4.18355   | 4.06756  | 3.44765    | 3.17427   | 4.79709   | 5.09419   |
| TSPAN7    | 0.356302  | 0.514521 | 3.05249    | 3.70334 ? |           | ?         |
| TSPAN9    | 2.9804    | 2.25485  | 2.81084    | 2.23104   | 3.77221   | 2.87826   |
| TSPO      | 3.33847   | 3.26848  | 3.1828     | 3.7209    | 3.17416   | 4.52929   |
| TSPYL1    | 4.44656   | 4.38386  | 4.74009    | 5.02024   | 5.99871   | 5.78363   |
| TSPYL2    | 3.58169   | 3.4782   | 3.29828    | 3.32163   | 3.40443   | 2.46322   |
| TSPYL4    | 3.00828   | 2.99249  | 3.3203     | 3.35674   | 4.20619   | 3.73207   |
| TSR1      | 6.02777   | 6.10025  | 5.45129    | 5.90491   | 6.97246   | 6.79761   |
| TSR2      | 3.50793   | 3.44705  | 2.77938    | 3.09085   | 3.03666   | 2.66833   |
| TSR3      | 2.60616   | 2.53534  | 2.63543    | 2.95408   | 3.16277   | 3.37526   |
| TSSC1     | 3.37238   | 3.36688  | 2.52039    | 2.86846   | 3.86226   | 4.4174    |
| TSSC4     | 3.41986   | 3.26338  | 2.77649    | 3.32789   | 2.77433   | 3.48804   |
| TSSK4     | -0.144345 | 0.237698 | 0.00643448 | 0.020584  | 0.293994  | -0.31423  |
| TST       | 0.952028  | 0.71714  | 2.68993    | 3.25312   | 0.134221  | 0.633217  |
| TSTA3     | 2.78474   | 2.76598  | 2.98641    | 3.41277   | 3.51959   | 4.31981   |
| TSTD1     | -2.45038  | -3.29152 | -3.85951   | -3.30006  | 2.62279   | 3.39395   |
| TSTD2     | 3.67611   | 3.66437  | 2.96378    | 3.00028   | 3.7655    | 3.55867   |
| TTBK2     | 4.21207   | 4.10065  | 4.72192    | 4.84958   | 4.65905   | 4.37764   |
| TTC1      | 4.05329   | 4.32586  | 4.53501    | 5.17657   | 5.50521   | 6.12577   |
| TTC12     | -6.68418  | -6.45019 | 1.12031    | 1.39106   | 2.25296   | 3.05816   |
| TTC13     | 4.56474   | 4.66384  | 3.76485    | 3.94644   | 3.93587   | 4.04483   |
| TTC14     | 5.14051   | 5.28282  | 5.20717    | 5.17425   | 5.93611   | 5.93577   |
| TTC17     | 5.24636   | 5.20115  | 5.66509    | 5.72879   | 6.83186   | 6.7365    |
| TTC19     | 4.96516   | 4.94898  | 4.91803    | 5.10022   | 5.58475   | 5.78564   |
| TTC21A    | 0.578089  | 0.525929 | 0.770744   | 0.430424  | -0.852709 | -1.18284  |
| TTC21B    | 4.51588   | 4.49219  | 3.9025     | 3.84417   | 3.69503   | 3.59837   |
| TTC23     | 3.92004   | 3.85644  | 3.70124    | 3.7299    | 3.87475   | 3.88482   |
| TTC26     | 2.94298   | 2.83408  | 3.20234    | 3.27272   | 3.28074   | 3.03138   |
| TTC27     | 3.70712   | 3.90456  | 1.97132    | 2.20407   | 3.96357   | 4.38868   |
| TTC28     | 4.46113   | 4.41442  | 0.936727   | 0.604403  | 5.5526    | 5.2115    |
| TTC28-AS1 | 2.90298   | 2.93836  | 2.75485    | 2.78393   | 2.95661   | 2.49602   |
| TTC3      | 6.50514   | 6.51693  | 7.2971     | 7.36427   | 6.59713   | 6.49856   |
| TTC30A    | 2.84283   | 2.91389  | 4.1083     | 4.31119   | 3.39661   | 3.19557   |
| TTC30B    | 1.97543   | 2.05768  | 3.13486    | 3.23755   | 2.34753   | 2.67064   |
| TTC31     | 4.15106   | 4.16285  | 3.28612    | 3.41082   | 3.47668   | 3.48804   |
| TTC32     | 1.25516   | 1.40138  | 1.08332    | 1.32585   | 0.634389  | 0.832509  |
| TTC33     | 3.23018   | 3.37794  | 2.98641    | 3.20406   | 3.37998   | 3.55068   |
| TTC37     | 6.18546   | 6.20248  | 6.44012    | 6.65      | 6.55702   | 7.08421   |
| TTC38     | 3.03394   | 2.95501  | 3.48182    | 3.65106   | 3.0436    | 3.17899   |
| TTC39B    | 2.81859   | 2.91002  | 3.57304    | 3.74915   | 3.81744   | 4.30311   |
| TTC39C    | 4.02903   | 3.97745  | 2.95669    | 3.35848   | 2.12183   | 2.56555   |
| TTC3P1    | 4.27856   | 4.28245  | 5.25158    | 5.2516    | 4.50992   | 4.47641   |
| TTC4      | 4.16356   | 4.08767  | 3.89542    | 4.3298    | 4.2703    | 4.54831   |
| TTC5      | 3.12033   | 3.21025  | 2.09043    | 2.40689   | 2.90698   | 3.14816   |
| TTC6      | -2.1135   | -2.76144 | 0.474784   | 0.476226  | 1.17263   | 0.293394  |
| TTC7A     | 3.26033   | 3.17197  | 3.74057    | 3.97374   | 3.49135   | 3.02226   |

|           |             |            |           |            |            |           |
|-----------|-------------|------------|-----------|------------|------------|-----------|
| TTC7B     | 3.23461     | 2.97179    | 2.13842   | 1.80409    | 2.15677    | 1.57179   |
| TTC8      | 3.1805      | 3.19358    | 2.46035   | 2.79807    | 2.30549    | 3.04818   |
| TTC9C     | 2.93574     | 2.95501    | 2.89597   | 3.37701    | 3.03492    | 3.31843   |
| TTF1      | 3.78171     | 3.82371    | 2.88526   | 2.9997     | 3.32126    | 3.49541   |
| TTF2      | 5.44239     | 5.5375     | 4.8595    | 5.1852     | 6.40846    | 6.18468   |
| TTI1      | 5.87618     | 5.92306    | 5.33856   | 5.40095    | 4.92977    | 4.94524   |
| TTI2      | 2.9662      | 2.98117    | 2.39485   | 3.01822    | 2.91976    | 3.01878   |
| TTK       | 5.31946     | 5.518      | 4.05846   | 4.50035    | 5.00947    | 5.79461   |
| TTL       | 6.41301     | 6.64267    | 4.82348   | 5.26291    | 5.68452    | 5.81045   |
| TTLL1     | -0.0415864  | -0.0520781 | 0.277259  | 0.788878   | 0.311712   | 0.592235  |
| TTLL12    | 5.20631     | 4.94867    | 3.83745   | 4.31743    | 4.5467     | 4.57983   |
| TTLL3     | 1.6894      | 1.64418    | 2.77242   | 2.72416    | 3.7446     | 2.8767    |
| TTLL4     | 5.0233      | 4.95024    | 4.44217   | 4.61823    | 4.79449    | 4.28055   |
| TTLL5     | 4.61661     | 4.57209    | 3.81929   | 3.95186    | 3.87394    | 3.83825   |
| TTLL7     | 4.13222     | 4.21046    | 3.9864    | 4.1391     | 6.13997    | 5.78262   |
| TTLL7-IT1 | 0.133932    | 0.292146   | 0.431281  | 0.19507    | 1.63893    | 0.68568   |
| TTN       | 5.21324     | 5.10659    | 2.08605   | 2.45563    | 4.93402    | 4.77627   |
| TTN-AS1   | 3.58148     | 3.44938    | 0.191891  | 0.184217   | 3.12254    | 3.30461   |
| TTPAL     | 5.08105     | 5.19937    | 5.0001    | 5.23213    | 5.32053    | 5.35871   |
| TTYH2     | 1.68032     | 1.49139    | 0.53081   | -0.0426024 | -0.324567  | -0.752286 |
| TTYH3     | 4.41663     | 3.98939    | 6.14035   | 5.80443    | 6.18125    | 6.24565   |
| TUB       | 4.28818     | 4.37871    | 4.24692   | 4.34237    | 3.27043    | 3.47568   |
| TUBA1A    | 6.03747     | 6.30321    | 6.53493   | 6.89983    | 8.74341    | 8.86979   |
| TUBA1B    | 9.92472     | 10.0381    | 9.41806   | 9.97542    | 9.70816    | 9.86222   |
| TUBA1C    | 8.13734     | 8.10182    | 6.98859   | 7.62625    | 8.27858    | 8.33019   |
| TUBA3C    | 4.63788     | 4.43905 ?  |           | -6.02121   | -6.64581 ? |           |
| TUBA3FP   | -0.00349555 | 0.336957   | 1.89523   | 2.2849     | 0.17081    | 0.138277  |
| TUBA4A    | -0.533681   | -0.305667  | 5.26429   | 6.05641    | 2.97013    | 2.73089   |
| TUBAP2    | 4.42134     | 4.70571    | 4.06968   | 4.64473    | 4.41709    | 4.4804    |
| TUBB      | 9.27684     | 9.35727    | 9.20738   | 9.5721     | 9.99939    | 9.87704   |
| TUBB1     | 0.827591    | 1.06244    | -0.175794 | 0.0735324  | 0.346066   | 0.13522   |
| TUBB2A    | 4.21304     | 4.17516    | 2.37317   | 2.95691    | 4.96741    | 5.76103   |
| TUBB2B    | 5.41998     | 5.55167    | -0.113782 | -0.0209405 | 4.81941    | 4.83118   |
| TUBB3     | 5.92651     | 5.90549    | 4.28593   | 4.96984    | 4.90998    | 5.45057   |
| TUBB4B    | 7.36155     | 7.36488    | 6.62521   | 7.15829    | 7.12925    | 7.29938   |
| TUBB6     | 5.53309     | 5.47927    | 4.03923   | 4.63376    | 5.23917    | 5.38762   |
| TUBB8P1   | 0.312247    | 0.432061   | 0.120378  | 0.213217   | 0.509706   | -0.214706 |
| TUBBP1    | 5.62714     | 5.75887    | 5.47076   | 5.89556    | 6.06846    | 6.12831   |
| TUBBP6    | -0.254178   | 0.345896   | 0.0463793 | 0.402449   | 0.872931   | -0.120327 |
| TUBD1     | 3.02884     | 3.00068    | 2.67447   | 2.71773    | 3.39226    | 3.4607    |
| TUBE1     | 2.21284     | 2.6233     | 2.25025   | 2.57008    | 2.65385    | 2.83245   |
| TUBG1     | 4.56343     | 4.43917    | 4.16493   | 4.57317    | 4.90863    | 5.06943   |
| TUBG2     | 2.31571     | 2.34597    | 2.16631   | 2.21817    | 2.63644    | 2.10919   |
| TUBGCP2   | 4.30959     | 4.34258    | 4.31306   | 4.65261    | 4.94575    | 5.14508   |
| TUBGCP3   | 3.86792     | 3.94322    | 3.89962   | 3.97777    | 3.50837    | 3.38743   |
| TUBGCP4   | 4.35125     | 4.31839    | 3.83587   | 3.96244    | 4.70865    | 4.71917   |
| TUBGCP5   | 3.44939     | 3.60324    | 3.84576   | 4.07852    | 4.03491    | 4.05484   |
| TUBGCP6   | 4.16819     | 3.83521    | 5.2147    | 5.21815    | 3.81035    | 3.29329   |
| TUFM      | 6.55198     | 6.52922    | 6.14339   | 6.41885    | 6.80089    | 6.89484   |
| TUFMP1    | 1.29532     | 1.71211    | 0.967515  | 1.46905    | 1.71497    | 1.50278   |
| TUFT1     | 2.95914     | 3.21311    | 2.29223   | 2.74605    | 4.5637     | 4.29328   |
| TUG1      | 6.7058      | 6.5237     | 7.04541   | 6.82725    | 6.43278    | 5.89967   |

|                 |           |           |            |           |            |           |
|-----------------|-----------|-----------|------------|-----------|------------|-----------|
| TULP3           | 4.23016   | 4.05679   | 4.17732    | 4.28026   | 3.48434    | 2.92992   |
| TULP4           | 5.15655   | 5.04097   | 4.82209    | 4.68233   | 6.6531     | 6.45125   |
| TUSC2           | 3.57704   | 3.69954   | 2.46034    | 3.01788   | 4.5473     | 4.96836   |
| TUSC3           | 5.94545   | 6.30159   | 4.46303    | 4.93624   | 4.64461    | 5.14425   |
| TUT1            | 3.07111   | 2.98523   | 2.8574     | 2.78946   | 2.48541    | 2.57595   |
| TVP23B          | 4.20329   | 4.47088   | 4.49407    | 5.05807   | 4.93833    | 6.10086   |
| TVP23C          | -0.889204 | -0.484705 | 1.57644    | 1.82309   | 2.64532    | 1.98133   |
| TVP23C-CDRT4    | -13.2877  | -4.9812   | -0.0932079 | -0.302769 | 2.09388    | 2.05952   |
| TVP23CP2        | 0.624251  | 0.680837  | 0.890384   | 1.48141   | 1.40553    | 2.13276   |
| TWF1            | 6.04817   | 6.26953   | 5.29864    | 5.77782   | 6.22212    | 6.54567   |
| TWF1P1          | 4.20849   | 4.36113   | 3.43441    | 3.94732   | 4.34408    | 5.35461   |
| TWF2            | 4.18434   | 3.99423   | 3.52998    | 4.05563   | 4.62971    | 5.38981   |
| TWIST1          | 1.32333   | 1.57061   | 2.33219    | 2.64657   | 1.7191     | 1.6942    |
| TWIST2          | 2.50794   | 2.61665   | 2.48538    | 3.0933    | -4.33548   | -5.69922  |
| TWISTNB         | 5.48206   | 5.54908   | 4.78081    | 5.26131   | 5.04877    | 5.34517   |
| TWSG1           | 4.16511   | 3.97803   | 4.99822    | 5.38351   | 5.20732    | 4.97452   |
| TXLNA           | 6.41498   | 6.52795   | 5.62343    | 6.24541   | 6.7848     | 6.93826   |
| TXLNG           | 5.01571   | 4.75646   | 3.78289    | 4.10963   | 4.11234    | 3.94352   |
| TXLNGY          | -6.68418  | -4.45968  | 6.06351    | 5.90483   | -6.64581 ? |           |
| TXN             | 4.74045   | 5.23639   | 6.00759    | 6.3737    | 5.36368    | 6.7069    |
| TXN2            | 4.31354   | 4.12023   | 3.53072    | 3.69369   | 4.41449    | 4.62643   |
| TXNDC11         | 3.62511   | 3.61921   | 3.67438    | 4.29405   | 3.66836    | 3.67699   |
| TXNDC12         | 5.71025   | 5.88259   | 5.21284    | 5.69669   | 5.95608    | 6.65504   |
| TXNDC15         | 4.93844   | 5.10844   | 5.11568    | 5.49711   | 5.19065    | 5.8134    |
| TXNDC16         | 3.15111   | 3.12024   | 2.85814    | 2.60543   | 2.27928    | 2.22404   |
| TXNDC17         | 3.80121   | 3.89579   | 3.83654    | 4.116     | 5.19277    | 5.97553   |
| TXNDC5          | 7.73625   | 7.40225   | 7.00593    | 7.2361    | 7.75956    | 7.75348   |
| TXNDC9          | 4.61739   | 4.79407   | 4.21157    | 4.77207   | 4.49524    | 5.51785   |
| TXNIP           | 4.1927    | 2.31525   | 7.31345    | 6.6645    | 5.09291    | 2.25909   |
| TXNL1           | 4.89318   | 5.1071    | 4.45181    | 4.83158   | 3.94654    | 4.33983   |
| TXNL4A          | 5.10303   | 5.21663   | 3.6651     | 4.09084   | 4.17098    | 4.4174    |
| TXNL4B          | 2.54055   | 2.67671   | 2.503      | 2.83954   | 4.01155    | 4.25906   |
| TXNP4           | -1.00531  | -0.435111 | 0.281241   | 0.861336  | -0.405451  | 1.00063   |
| TXNP5           | -1.23932  | -0.680082 | 0.63659    | 0.783088  | -0.258907  | 0.466831  |
| TXNP6           | 1.9002    | 2.48394   | 3.18821    | 3.65753   | 2.39604    | 3.81542   |
| TXNRD1          | 7.24568   | 7.14391   | 8.98434    | 9.36502   | 7.80729    | 7.98857   |
| TXNRD2          | 3.14798   | 3.12212   | 2.82211    | 3.02046   | 2.15989    | 2.49297   |
| TXNRD3          | 1.46083   | 1.39528   | 2.26771    | 2.33413   | -0.490195  | -0.619042 |
| TYK2            | 4.39631   | 4.30202   | 3.91055    | 4.04852   | 4.90906    | 4.62083   |
| TYMP            | 1.06089   | 0.788502  | 0.610983   | 0.535117  | -1.39952   | -1.89883  |
| TYMS            | 4.55101   | 4.40008   | 4.66331    | 4.77628   | 5.54438    | 5.79235   |
| TYRO3           | 5.47137   | 5.12932   | 3.90303    | 3.98898   | 4.53041    | 4.3751    |
| TYRO3P          | 1.91666   | 1.65417   | 1.67872    | 1.30204   | 0.994544   | 0.321212  |
| TYRP1           | -0.191134 | -0.105152 | 1.60441    | 1.45345   | -1.30241   | -2.53597  |
| TYSND1          | 3.31354   | 3.31852   | 2.59456    | 2.82192   | 2.70602    | 2.9972    |
| TYW1            | 3.99942   | 4.01825   | 4.1303     | 4.29941   | 4.19774    | 4.05919   |
| TYW1B           | 1.55537   | 1.38363   | 1.25888    | 1.19719   | 1.19992    | 0.539918  |
| TYW3            | 4.86441   | 4.94025   | 3.95451    | 4.12547   | 4.64175    | 4.83539   |
| TYW5            | 3.61841   | 3.63494   | 3.50982    | 3.4303    | 3.56758    | 3.60367   |
| Telomerase-vert | 2.17434   | 1.6805    | 2.57715    | 2.70328   | 2.48492    | 4.07744   |
| U1              | 7.31778   | 7.53197   | 7.41069    | 7.26231   | 7.08072    | 7.44485   |
| U2              | 9.09148   | 9.09537   | 8.4566     | 8.49119   | 9.05228    | 9.89109   |



|           |           |           |          |              |           |           |
|-----------|-----------|-----------|----------|--------------|-----------|-----------|
| U2AF1     | 4.64922   | 4.59989   | 5.66954  | 5.53028      | 4.59221   | 4.21486   |
| U2AF1L4   | 0.514329  | 0.548466  | 1.23789  | 1.6725       | 1.93656   | 1.35077   |
| U2AF1L5   | 3.28642   | 3.09342   | 3.23223  | 3.74616      | 2.8107    | 2.46913   |
| U2AF2     | 6.07199   | 5.98784   | 5.20987  | 5.5605       | 6.80905   | 6.80008   |
| U2SURP    | 6.5614    | 6.67105   | 7.07711  | 7.21932      | 6.41941   | 6.32913   |
| U3        | 1.19936   | 0.963482  | 1.63029  | 1.64609      | 1.16629   | 2.19417   |
| U47924.31 | 0.296217  | 0.390932  | 1.0812   | 1.06299      | -0.578056 | 0.679955  |
| U47924.6  | 1.29202   | 1.09948   | 1.42731  | 1.78745      | 1.21445   | 1.15092   |
| U73166.2  | 1.9484    | 2.22367   | 0.138526 | -0.000171691 | -0.356358 | -0.799586 |
| UACA      | 5.57531   | 5.70456   | 6.68544  | 7.0175       | 5.79629   | 6.10184   |
| UAP1      | 5.90316   | 6.00448   | 4.06203  | 4.81226      | 6.53693   | 6.95858   |
| UAP1L1    | 3.15423   | 2.86584   | 3.22587  | 3.58988      | 3.24657   | 2.59708   |
| UBA1      | 7.2861    | 7.17997   | 6.41355  | 6.73847      | 6.17768   | 6.09618   |
| UBA2      | 6.25728   | 6.35531   | 5.76594  | 6.13256      | 7.00005   | 7.39465   |
| UBA3      | 4.73188   | 4.96914   | 4.44219  | 4.92654      | 4.59406   | 5.08282   |
| UBA5      | 4.25292   | 4.26971   | 4.2282   | 4.26777      | 4.54366   | 4.18652   |
| UBA52     | 7.01604   | 6.99603   | 5.97991  | 6.5194       | 7.72096   | 8.27388   |
| UBA6      | 5.82936   | 6.13218   | 5.25422  | 5.65189      | 6.82565   | 7.22992   |
| UBA6-AS1  | 2.24706   | 2.18528   | 1.93906  | 2.0075       | 3.514     | 3.66635   |
| UBA7      | 0.710384  | 0.676782  | 4.25214  | 4.46292      | 2.66163   | 2.41742   |
| UBAC1     | 3.72403   | 3.7319    | 3.14291  | 3.54222      | 4.07355   | 4.39      |
| UBAC2     | 4.50852   | 4.51013   | 4.44035  | 4.60369      | 4.7427    | 5.22622   |
| UBALD1    | 1.36166   | 1.06859   | 0.53081  | 0.968047     | 0.774384  | 0.176042  |
| UBALD2    | 3.72718   | 3.42742   | 1.55122  | 1.98395      | 2.42451   | 2.55539   |
| UBAP1     | 3.71953   | 3.70583   | 3.59436  | 3.87701      | 5.69301   | 5.8669    |
| UBAP1L    | 2.13699   | 1.88591   | 1.23438  | 1.27492      | 1.50965   | 0.50283   |
| UBAP2     | 4.32259   | 4.3275    | 4.38348  | 4.60799      | 5.21812   | 4.99372   |
| UBAP2L    | 6.39647   | 6.29909   | 5.75126  | 5.9111       | 6.0629    | 5.87213   |
| UBASH3B   | 6.40698   | 6.44102   | 3.49771  | 4.19609      | 4.85735   | 4.63758   |
| UBB       | 7.39336   | 7.24257   | 8.03072  | 8.64078      | 8.5335    | 8.91017   |
| UBBP4     | 2.10263   | 2.2346    | 2.25254  | 3.05508      | 2.96491   | 2.35686   |
| UBC       | 9.46086   | 9.59307   | 9.49216  | 10.0174      | 9.39078   | 9.94107   |
| UBE2A     | 4.10343   | 4.13431   | 4.56641  | 4.90243      | 5.16019   | 5.46759   |
| UBE2B     | 4.10504   | 4.00374   | 3.73534  | 3.96129      | 4.08703   | 3.92627   |
| UBE2C     | 5.78649   | 5.67318   | 4.4729   | 4.91283      | 4.77327   | 4.69309   |
| UBE2D1    | 2.62736   | 2.82948   | 3.29424  | 3.41865      | 2.70602   | 2.41742   |
| UBE2D2    | 4.40092   | 4.68482   | 4.53758  | 5.11396      | 5.07228   | 5.44745   |
| UBE2D3    | 6.56129   | 6.6901    | 6.44063  | 6.80783      | 6.71441   | 7.12462   |
| UBE2D3P1  | 2.62586   | 2.91386   | 2.30606  | 2.81548      | 2.9027    | 3.31579   |
| UBE2D3P2  | 1.08405   | 1.24562   | 0.796257 | 1.2829       | 1.44118   | 1.86093   |
| UBE2D4    | 2.13125   | 2.35016   | 0.559678 | 1.17344      | 2.75783   | 3.31636   |
| UBE2E1    | 5.10547   | 4.94761   | 4.22267  | 4.60455      | 5.33685   | 5.76647   |
| UBE2E2    | 2.82449   | 2.82487   | -3.37468 | -2.02079     | 3.60061   | 3.90246   |
| UBE2E3    | 4.03611   | 3.84331   | 4.44632  | 4.31893      | 4.744     | 4.86807   |
| UBE2F     | 3.6921    | 3.71252   | 3.05986  | 3.4409       | 3.56972   | 3.73322   |
| UBE2G1    | 4.58921   | 4.36051   | 4.70064  | 4.95388      | 5.15906   | 4.77205   |
| UBE2G2    | 5.62649   | 5.66675   | 5.96399  | 6.09787      | 6.41413   | 6.13444   |
| UBE2H     | 5.93728   | 5.78394   | 6.09892  | 6.42112      | 6.91559   | 6.85763   |
| UBE2HP1   | -0.486594 | -0.489838 | 0.600412 | 1.13763      | 0.829752  | 0.383652  |
| UBE2I     | 4.75727   | 4.61836   | 4.84782  | 5.07855      | 4.76946   | 4.51116   |
| UBE2J1    | 4.95331   | 4.94918   | 3.79232  | 4.23436      | 5.35544   | 5.44175   |
| UBE2J2    | 3.58284   | 3.50438   | 3.17623  | 3.44192      | 4.44363   | 4.48187   |

|          |          |          |            |          |          |           |
|----------|----------|----------|------------|----------|----------|-----------|
| UBE2K    | 5.31109  | 5.30534  | 5.29776    | 5.2662   | 6.28053  | 6.07547   |
| UBE2L3   | 6.05888  | 6.12615  | 5.75035    | 6.16481  | 5.71936  | 5.87086   |
| UBE2L4   | 0.818515 | 0.994652 | 0.266433   | 0.754913 | 0.626701 | 0.607636  |
| UBE2L6   | 2.90084  | 3.24797  | 5.00135    | 5.68435  | 3.3537   | 4.07793   |
| UBE2M    | 4.03747  | 4.02889  | 3.68485    | 4.07845  | 5.10023  | 5.33137   |
| UBE2MP1  | 2.81036  | 2.89717  | 2.21862    | 2.77401  | 3.96486  | 4.00616   |
| UBE2N    | 5.72982  | 5.80235  | 4.77147    | 5.12622  | 5.58421  | 6.17016   |
| UBE2O    | 4.77764  | 4.80511  | 5.12879    | 5.31638  | 5.76041  | 5.17516   |
| UBE2Q1   | 5.08105  | 5.1477   | 4.05607    | 4.51869  | 5.2116   | 5.41158   |
| UBE2Q2   | 3.67051  | 3.73314  | 3.36145    | 3.77991  | 3.89428  | 4.11983   |
| UBE2Q2P1 | 0.61388  | 0.344613 | 2.65409    | 2.69174  | 0.847548 | 0.422664  |
| UBE2Q2P2 | 1.0834   | 0.947539 | 1.33439    | 0.90032  | 0.855192 | -0.451193 |
| UBE2Q2P6 | 7.53838  | 7.47392  | 6.99958    | 7.51575  | 8.40427  | 9.92747   |
| UBE2R2   | 4.18202  | 4.15645  | 4.38917    | 4.62249  | 5.58464  | 5.42192   |
| UBE2S    | 4.18358  | 3.95441  | 3.74747    | 4.312    | 5.19076  | 5.40179   |
| UBE2SP1  | 4.56475  | 4.32129  | 4.03214    | 4.63869  | 5.56801  | 5.51023   |
| UBE2SP2  | 2.56775  | 2.45347  | 1.9443     | 2.42624  | 3.39412  | 3.90552   |
| UBE2T    | 4.39763  | 4.48625  | 3.72186    | 4.11154  | 3.95624  | 4.56007   |
| UBE2V1   | 5.49293  | 5.4645   | 5.31709    | 5.5236   | 5.67718  | 5.74051   |
| UBE2V1P2 | 1.97103  | 2.04606  | 1.71054    | 2.19812  | 2.32565  | 2.48985   |
| UBE2V2   | 5.1824   | 5.28951  | 4.8629     | 5.15795  | 5.08745  | 5.32395   |
| UBE2W    | 4.09123  | 4.22277  | 4.39012    | 4.65355  | 4.95854  | 5.22337   |
| UBE2Z    | 5.92889  | 5.9692   | 5.65527    | 6.06482  | 6.01483  | 6.23069   |
| UBE3A    | 6.03015  | 6.11397  | 5.95137    | 6.21535  | 5.44559  | 5.65674   |
| UBE3B    | 4.59124  | 4.51236  | 4.57569    | 4.7268   | 4.24822  | 4.13721   |
| UBE3C    | 6.61044  | 6.6282   | 6.39864    | 6.72387  | 6.21296  | 6.12104   |
| UBE3D    | 2.8107   | 3.14449  | 1.89332    | 2.02562  | 2.64119  | 2.88201   |
| UBE4A    | 6.35277  | 6.44195  | 6.5669     | 6.85082  | 6.33582  | 6.39314   |
| UBE4B    | 5.2493   | 4.99915  | 5.04649    | 5.02755  | 5.51368  | 5.02714   |
| UBFD1    | 5.21099  | 5.79819  | 5.3144     | 6.01425  | 5.29258  | 5.91519   |
| UBIAD1   | 2.97335  | 2.90567  | 2.81366    | 3.22209  | 4.12432  | 4.07628   |
| UBL3     | 3.90547  | 3.70707  | 3.07622    | 2.95996  | 5.22918  | 5.06311   |
| UBL4A    | 5.10019  | 5.03248  | 3.9573     | 4.33203  | 5.27268  | 5.61971   |
| UBL5     | 4.9355   | 4.89133  | 4.01737    | 4.43367  | 5.57246  | 6.61613   |
| UBL5P2   | 0.435309 | 0.851383 | -0.0134303 | 0.37569  | 1.31046  | 1.94967   |
| UBL7     | 3.96714  | 3.87478  | 2.99888    | 3.33825  | 4.01211  | 4.47939   |
| UBL7-AS1 | 1.25688  | 1.27003  | 1.40799    | 1.44067  | 0.603074 | 1.06392   |
| UBLCP1   | 3.74178  | 3.59785  | 4.1474     | 4.22321  | 4.35369  | 4.34176   |
| UBN1     | 5.05371  | 5.20782  | 4.92826    | 5.06296  | 5.01696  | 4.63979   |
| UBN2     | 5.13223  | 5.07534  | 4.86904    | 4.73195  | 5.30981  | 5.12538   |
| UBOX5    | 2.07736  | 2.18168  | 3.01981    | 3.18502  | 2.12868  | 2.16511   |
| UBP1     | 5.9216   | 5.78776  | 5.01184    | 4.91769  | 6.12124  | 5.9299    |
| UBQLN1   | 5.98481  | 6.15735  | 6.11567    | 6.29734  | 6.07563  | 6.20355   |
| UBQLN2   | 3.23166  | 3.25826  | 3.86768    | 3.91493  | 4.18596  | 4.46696   |
| UBQLN4   | 5.14869  | 5.12682  | 3.64257    | 3.85003  | 4.4902   | 4.55063   |
| UBQLN4P1 | 2.99116  | 2.89022  | 1.52581    | 1.76028  | 2.3135   | 2.26502   |
| UBR1     | 5.50088  | 5.54804  | 5.15855    | 5.36993  | 5.41281  | 5.74912   |
| UBR2     | 4.88494  | 4.96182  | 5.00876    | 5.42159  | 5.28581  | 5.60558   |
| UBR3     | 5.78346  | 5.88087  | 5.99855    | 6.11154  | 6.10748  | 6.04231   |
| UBR4     | 7.69696  | 7.69144  | 8.26551    | 8.41495  | 8.16623  | 7.47939   |
| UBR5     | 6.60556  | 6.466    | 7.19462    | 7.24879  | 6.88157  | 6.65303   |
| UBR5-AS1 | 0.370577 | 0.674569 | 1.27865    | 1.14795  | 0.800024 | 0.52311   |

|           |            |          |          |          |           |           |
|-----------|------------|----------|----------|----------|-----------|-----------|
| UBR7      | 4.92569    | 4.96539  | 3.63186  | 4.00752  | 4.90897   | 4.90153   |
| UBTD1     | 2.16512    | 1.74176  | 2.19587  | 2.28779  | 2.61582   | 2.41742   |
| UBTD2     | 3.48083    | 3.67798  | 4.17513  | 4.31743  | 4.18909   | 4.26051   |
| UBTF      | 5.29809    | 5.25482  | 4.96558  | 5.13013  | 5.66415   | 5.51243   |
| UBXN1     | 4.95778    | 5.00118  | 4.08911  | 4.60456  | 4.54181   | 4.57521   |
| UBXN11    | 2.74066    | 2.46648  | 2.76128  | 2.7468   | 1.86673   | 1.58814   |
| UBXN2A    | 4.45763    | 4.12117  | 3.40893  | 3.15327  | 4.2719    | 3.71954   |
| UBXN2B    | 3.41321    | 3.58316  | 3.46688  | 3.78013  | 4.49344   | 4.75132   |
| UBXN4     | 6.13538    | 6.11059  | 6.48446  | 6.57901  | 6.41449   | 6.14696   |
| UBXN6     | 3.59548    | 3.41238  | 3.56123  | 3.7967   | 4.48341   | 5.02203   |
| UBXN7     | 5.41463    | 5.25394  | 6.09433  | 6.11999  | 6.28      | 5.99718   |
| UBXN8     | 3.11951    | 2.91654  | 1.69303  | 1.89683  | 2.64119   | 3.0041    |
| UCHL1     | 4.77259    | 5.12445  | 6.71544  | 7.31987  | 8.17865   | 8.47653   |
| UCHL3     | 2.46025    | 2.5211   | 2.1651   | 2.75451  | 3.13873   | 4.03564   |
| UCHL5     | 5.5187     | 5.62383  | 4.65363  | 4.93593  | 5.38096   | 5.45265   |
| UCK1      | 3.76852    | 3.51301  | 3.20018  | 3.47614  | 3.87399   | 3.86314   |
| UCK2      | 5.90644    | 5.88233  | 4.41709  | 4.70457  | 5.19876   | 5.20909   |
| UCKL1     | 3.52715    | 3.4954   | 3.07324  | 3.52682  | 3.44144   | 3.83204   |
| UCKL1-AS1 | 0.55616    | 0.51784  | 0.467582 | 0.441292 | 0.0754505 | 0.022517  |
| UCN2      | 2.7492     | 2.80196  | 2.08568  | 2.5559   | 1.16493   | 0.764049  |
| UCP2      | 2.27535    | 1.89913  | 1.6494   | 1.4458   | -0.530833 | -0.280287 |
| UEVLD     | 3.20028    | 3.55536  | 3.53072  | 4.0243   | 3.6537    | 4.0246    |
| UFC1      | 4.69592    | 4.42513  | 3.70674  | 3.94238  | 5.24768   | 5.48188   |
| UFD1L     | 5.77734    | 5.82661  | 5.27479  | 5.67911  | 4.84278   | 4.92415   |
| UFL1      | 4.08882    | 4.12399  | 4.35175  | 4.41571  | 4.44821   | 4.91442   |
| UFM1      | 4.64244    | 4.69181  | 4.70967  | 5.16377  | 5.21772   | 5.44999   |
| UFSP2     | 3.12609    | 3.19138  | 2.498    | 2.73766  | 3.43808   | 3.69664   |
| UG0898H09 | -6.68418   | -6.45019 | -6.17309 | -5.10387 | 2.71691   | 2.46823   |
| UGCG      | 5.28817    | 5.7466   | 5.5234   | 6.20602  | 4.71635   | 5.41675   |
| UGDH      | 4.57476    | 4.51658  | 5.31037  | 5.98246  | 4.64225   | 4.79912   |
| UGGT1     | 7.77871    | 7.78919  | 7.28887  | 7.53247  | 7.29334   | 7.14345   |
| UGGT2     | 5.23533    | 5.28827  | 4.98576  | 5.13374  | 4.58225   | 4.81193   |
| UGP2      | 6.69591    | 6.85131  | 4.77719  | 5.10001  | 5.17374   | 5.75423   |
| UGT8      | 5.01256    | 5.27102  | -4.59508 | -5.10387 | 3.6605    | 3.60163   |
| UHMK1     | 7.37556    | 7.8535   | 6.82086  | 7.53665  | 7.31473   | 8.30049   |
| UHRF1     | 5.00494    | 5.50465  | 4.06118  | 4.70698  | 4.34028   | 4.53049   |
| UHRF1BP1  | 4.4532     | 4.41366  | 4.14178  | 4.23547  | 5.33441   | 4.808     |
| UHRF1BP1L | 4.38904    | 4.6677   | 4.45579  | 4.91908  | 4.42052   | 5.10704   |
| UHRF2     | 5.01114    | 4.95116  | 4.48427  | 4.37196  | 5.47646   | 5.26609   |
| UHRF2P1   | 0.55218    | 0.648401 | 1.45478  | 1.42259  | 1.61434   | 1.34029   |
| UIMC1     | 3.72508    | 3.77675  | 4.13388  | 4.30585  | 4.39632   | 4.35262   |
| ULBP2     | 1.72869    | 1.359    | 1.87597  | 2.34141  | 2.72209   | 2.6808    |
| ULBP3     | 2.15793    | 2.26114  | 0.525087 | 0.964606 | 1.75315   | 1.44652   |
| ULK1      | 2.28678    | 1.87703  | 2.9406   | 2.86559  | 2.06763   | 2.10066   |
| ULK2      | -6.68418 ? |          | -1.72363 | -1.93836 | 2.90384   | 2.18205   |
| ULK3      | 3.6251     | 3.46345  | 2.72638  | 3.07605  | 3.55764   | 3.51487   |
| ULK4      | 2.27822    | 2.11082  | 1.80519  | 2.02562  | 2.50963   | 2.50762   |
| UMAD1     | 2.65365    | 2.69975  | 2.53934  | 2.78028  | 3.06713   | 3.26529   |
| UMPS      | 4.2746     | 4.39357  | 3.87717  | 4.2727   | 4.13572   | 4.5269    |
| UNC119    | 3.04239    | 2.96343  | 3.41453  | 3.70655  | 3.86814   | 3.35127   |
| UNC119B   | 4.80072    | 4.84946  | 4.188    | 4.68358  | 4.04416   | 4.27912   |
| UNC13B    | 3.49567    | 3.70457  | 2.08796  | 2.37096  | 5.56306   | 5.75478   |

|           |           |           |           |          |           |          |
|-----------|-----------|-----------|-----------|----------|-----------|----------|
| UNC45A    | 5.19327   | 5.16034   | 5.07408   | 5.37779  | 5.11816   | 5.14784  |
| UNC50     | 3.7449    | 3.64829   | 3.29018   | 3.43034  | 3.92465   | 4.15747  |
| UNC5C     | 3.99701   | 3.43046   | 1.82773   | 1.68562  | 6.70476   | 6.63728  |
| UNC80     | 0.54893   | 0.603321  | -3.85951  | -3.78492 | 1.44302   | 0.965773 |
| UNC93B1   | 1.76289   | 1.83639   | 2.57433   | 2.98573  | 1.90036   | 2.65524  |
| UNG       | 4.749     | 4.85287   | 3.37682   | 3.87843  | 4.06164   | 4.36742  |
| UNK       | 3.79137   | 3.52847   | 3.35581   | 3.4089   | 3.75761   | 3.63707  |
| UNKL      | 3.54563   | 2.62342   | 3.80244   | 3.07829  | 2.95264   | 1.43376  |
| UPF1      | 4.58632   | 4.4877    | 4.33217   | 4.47519  | 5.04184   | 5.16826  |
| UPF2      | 4.87315   | 4.91709   | 4.06322   | 4.21196  | 4.9781    | 4.85554  |
| UPF3A     | 3.71169   | 3.58284   | 4.07382   | 4.03246  | 3.93848   | 3.71377  |
| UPF3AP1   | 0.457689  | 0.0556122 | 0.424245  | 0.780814 | 0.504417  | 0.971847 |
| UPF3AP2   | 0.529981  | 0.607437  | 0.833497  | 0.903254 | 1.43103   | 1.06577  |
| UPF3B     | 3.05914   | 3.02901   | 3.15633   | 3.36488  | 3.96082   | 3.76292  |
| UPK3BL    | 2.62694   | 2.48433   | 2.78621   | 2.79286  | 2.52286   | 1.71877  |
| UPP1      | 4.24636   | 4.17559   | 3.39013   | 3.85262  | 4.54547   | 4.4481   |
| UPRT      | 2.27535   | 2.34452   | 2.52039   | 2.59509  | 4.12513   | 4.27627  |
| UQCC1     | 5.11989   | 5.18596   | 5.14738   | 5.49015  | 4.85882   | 5.18278  |
| UQCC2     | 3.78213   | 3.77959   | 3.75763   | 4.11641  | 4.60758   | 5.01329  |
| UQCC3     | 2.17481   | 1.95523   | 1.76003   | 1.81973  | 1.85624   | 2.49209  |
| UQCR10    | 4.44429   | 4.21926   | 4.7316    | 5.0428   | 4.96949   | 5.45125  |
| UQCR11    | 3.76137   | 3.70206   | 2.87176   | 3.2399   | 4.3453    | 5.57521  |
| UQCRB     | 4.81247   | 4.86344   | 5.07632   | 5.40495  | 5.78533   | 6.81853  |
| UQCRBP1   | 1.20622   | 1.37217   | 1.6338    | 2.022    | 2.452     | 2.86293  |
| UQCRC1    | 6.41253   | 6.40461   | 5.57885   | 6.08283  | 6.97765   | 7.23339  |
| UQCRC2    | 5.47021   | 5.48734   | 5.71544   | 6.11215  | 5.61318   | 6.04398  |
| UQCRFS1   | 4.56863   | 4.44669   | 5.17698   | 5.4364   | 5.93931   | 6.26402  |
| UQCRFS1P1 | 0.371592  | 0.473371  | 1.2225    | 1.62213  | 1.98798   | 2.36054  |
| UQCRH     | 5.77805   | 5.80923   | 5.33465   | 5.88259  | 6.16723   | 7.10221  |
| UQCRHL    | 5.63527   | 5.65278   | 5.22264   | 5.62384  | 6.05193   | 6.62136  |
| UQCRQ     | 5.55416   | 5.55533   | 5.28865   | 5.71925  | 6.20711   | 7.32985  |
| URB1      | 5.82491   | 5.84596   | 5.68529   | 5.87985  | 5.89377   | 5.63366  |
| URB1-AS1  | 0.399051  | 0.122235  | 1.07392   | 0.946514 | 1.29393   | 1.58794  |
| URB2      | 5.20065   | 5.17558   | 3.95985   | 4.24211  | 5.32232   | 5.27769  |
| URGCP     | 4.58265   | 4.28555   | 4.48357   | 4.52631  | 4.33297   | 4.05985  |
| URI1      | 4.74489   | 4.71767   | 4.77864   | 5.03646  | 5.71361   | 5.86835  |
| URM1      | 4.28176   | 4.08211   | 3.59455   | 3.81894  | 4.04963   | 4.28763  |
| UROD      | 5.18355   | 5.12492   | 5.56131   | 5.89432  | 5.10414   | 5.68291  |
| UROS      | 3.55948   | 3.45154   | 3.94189   | 4.21084  | 3.95715   | 4.27342  |
| USB1      | 2.94838   | 2.63783   | 3.87458   | 4.23658  | 4.98804   | 4.94702  |
| USE1      | 1.69327   | 1.64571   | 0.904002  | 0.761609 | 2.3397    | 2.27058  |
| USF1      | 4.4532    | 4.47305   | 4.26458   | 4.56448  | 4.4625    | 4.56357  |
| USF2      | 4.03562   | 4.17829   | 3.2088    | 3.60026  | 4.04186   | 4.20767  |
| USH2A     | 1.16516   | 0.963482  | 0.431281  | 0.020584 | 0.351018  | 0.483199 |
| USMG5     | 4.57336   | 4.6877    | 3.53194   | 4.15152  | 5.4195    | 6.72514  |
| USMG5P1   | 0.370466  | 0.353798  | -0.176968 | 0.167101 | 1.52011   | 2.32248  |
| USO1      | 5.33707   | 5.55569   | 5.46481   | 6.00552  | 6.40903   | 7.02555  |
| USP1      | 6.27068   | 6.34323   | 5.69063   | 6.04975  | 5.95273   | 6.3714   |
| USP10     | 5.74398   | 5.78064   | 5.761     | 6.02121  | 5.44035   | 5.21616  |
| USP11     | 5.05288   | 5.09747   | 4.04409   | 4.38702  | 4.2413    | 4.3087   |
| USP12     | 4.2584    | 4.49494   | 4.33931   | 4.97148  | 4.09869   | 4.75277  |
| USP12PX   | -0.322074 | -0.138969 | 0.220503  | 0.564398 | 0.0184633 | 0.579238 |

|          |          |          |           |           |            |           |
|----------|----------|----------|-----------|-----------|------------|-----------|
| USP13    | 4.6716   | 4.55604  | 4.74278   | 4.8526    | 5.06759    | 5.00924   |
| USP14    | 4.37723  | 4.38809  | 5.0217    | 5.19892   | 5.40573    | 5.52449   |
| USP15    | 5.59094  | 5.61329  | 4.88053   | 5.15385   | 4.96676    | 5.47071   |
| USP16    | 4.53071  | 4.47645  | 4.97533   | 5.0085    | 5.06456    | 5.54296   |
| USP18    | 0.457657 | 0.201132 | 1.65747   | 1.6769    | 2.69891    | 2.58792   |
| USP19    | 5.26526  | 5.14077  | 4.31432   | 4.60541   | 5.44656    | 5.50881   |
| USP20    | 2.37239  | 2.05287  | 2.52729   | 2.48364   | 2.49957    | 2.35939   |
| USP21    | 3.59554  | 3.50005  | 3.00136   | 3.1835    | 2.90003    | 2.87072   |
| USP22    | 6.68908  | 6.3877   | 7.13628   | 7.23199   | 7.69574    | 7.06845   |
| USP24    | 6.59093  | 6.61663  | 6.55582   | 6.6717    | 6.34688    | 6.2982    |
| USP25    | 4.101    | 3.99248  | 4.80586   | 5.001     | 4.6406     | 4.66178   |
| USP27X   | 1.55834  | 1.28539  | 0.945825  | 1.21315   | -0.374735  | -0.848487 |
| USP28    | 2.82841  | 2.69704  | 4.75972   | 4.99248   | 4.3312     | 4.24602   |
| USP3     | 4.70057  | 4.7415   | 4.36215   | 4.41828   | 4.45068    | 4.38888   |
| USP3-AS1 | 1.20116  | 1.29579  | 1.22408   | 0.690024  | 0.345135   | -0.340028 |
| USP30    | 2.36702  | 2.37321  | 2.43406   | 2.58118   | 2.06081    | 2.1388    |
| USP31    | 5.07115  | 4.93214  | 4.44127   | 4.49664   | 5.31625    | 4.66069   |
| USP32    | 5.63132  | 5.63949  | 5.03496   | 5.47411   | 6.12791    | 6.16316   |
| USP32P1  | -3.11163 | -2.91325 | -0.269587 | -0.177761 | 2.31559    | 1.265     |
| USP32P2  | ?        | -12.9395 | 2.86146   | 2.51541   | 1.42538    | 0.773406  |
| USP32P3  | -5.63492 | -6.40401 | 0.673448  | 0.73683   | 2.64022    | 2.36405   |
| USP33    | 5.49565  | 5.73345  | 5.85606   | 6.14058   | 5.81693    | 6.27377   |
| USP34    | 7.65994  | 7.57762  | 6.93387   | 7.03442   | 7.22896    | 7.18605   |
| USP35    | 3.13697  | 2.94655  | 3.18934   | 3.34856   | 2.0946     | 1.41227   |
| USP36    | 4.78674  | 4.63386  | 4.00383   | 4.10306   | 4.8245     | 4.29046   |
| USP37    | 4.61998  | 5.03544  | 4.83439   | 5.22425   | 4.78042    | 5.18309   |
| USP38    | 4.40944  | 4.43045  | 4.16409   | 4.48362   | 4.85096    | 5.21215   |
| USP39    | 4.9225   | 4.86076  | 4.15521   | 4.52597   | 4.86422    | 4.94522   |
| USP4     | 4.36566  | 4.38967  | 3.72787   | 3.9024    | 4.30691    | 4.25184   |
| USP40    | 4.92114  | 4.65868  | 3.65253   | 3.67253   | 5.06376    | 4.72583   |
| USP42    | 3.19119  | 3.10511  | 3.42011   | 3.23103   | 3.04359    | 2.67267   |
| USP43    | -2.45038 | -2.6546  | 1.20023   | 1.52057 ? | ?          |           |
| USP45    | 3.17897  | 3.55674  | 3.50122   | 3.54402   | 3.89043    | 3.98153   |
| USP46    | 4.37506  | 4.42055  | 3.80232   | 3.89679   | 4.27926    | 4.20017   |
| USP47    | 5.54201  | 5.50221  | 6.05545   | 6.29472   | 5.4638     | 5.56533   |
| USP48    | 5.36633  | 5.35892  | 4.91779   | 5.09329   | 5.34741    | 5.19415   |
| USP49    | 2.82355  | 2.76139  | 3.44257   | 3.21409   | 3.1113     | 2.27378   |
| USP5     | 5.78472  | 5.59616  | 5.44764   | 5.78787   | 5.60851    | 5.50515   |
| USP51    | 0.183671 | 0.237698 | 1.09265   | 1.26626 ? | ?          |           |
| USP53    | 5.48331  | 5.39047  | 2.77649   | 2.73353   | 4.55278    | 4.44556   |
| USP54    | 3.65717  | 3.8568   | 3.40962   | 3.65868   | 3.31553    | 3.38299   |
| USP6NL   | 4.72191  | 4.6509   | 3.29626   | 3.47801   | 4.03926    | 3.78313   |
| USP7     | 5.79531  | 5.79411  | 5.90841   | 6.1226    | 5.69845    | 5.67475   |
| USP8     | 5.39999  | 5.45828  | 5.00602   | 5.24422   | 5.78653    | 6.04561   |
| USP8P1   | 0.976195 | 1.11517  | 0.597917  | 0.948048  | 1.59855    | 1.29333   |
| USP9X    | 7.06256  | 7.00878  | 5.7659    | 5.92007   | 7.1063     | 7.04228   |
| USP9Y    | ?        | -4.45968 | 5.27997   | 5.25036   | -6.64581 ? |           |
| USPL1    | 4.022    | 4.09844  | 3.97885   | 4.2299    | 4.30114    | 4.46945   |
| UST      | 2.28108  | 2.27864  | 2.60439   | 2.88836   | 4.70874    | 5.15979   |
| UTP11L   | 4.82888  | 4.79512  | 3.58632   | 3.85839   | 5.12595    | 5.21882   |
| UTP14A   | 3.9984   | 4.12759  | 3.58774   | 4.08294   | 4.84257    | 5.28669   |
| UTP14C   | 4.30868  | 4.37862  | 4.55275   | 4.73056   | 4.5351     | 4.5632    |

|           |            |           |           |         |            |            |
|-----------|------------|-----------|-----------|---------|------------|------------|
| UTP15     | 4.20113    | 4.29952   | 4.18388   | 4.58389 | 4.64859    | 4.9379     |
| UTP18     | 4.92524    | 4.96289   | 3.8771    | 4.3669  | 4.42979    | 4.9841     |
| UTP20     | 6.79478    | 6.85315   | 5.06321   | 5.36335 | 5.68564    | 5.61802    |
| UTP23     | 3.81605    | 3.91118   | 3.29567   | 3.61985 | 4.61433    | 4.68455    |
| UTP3      | 4.52853    | 4.71581   | 3.34004   | 3.75845 | 5.13084    | 5.30101    |
| UTP6      | 5.27017    | 5.41094   | 4.52362   | 4.99235 | 5.28546    | 5.80255    |
| UTRN      | 6.01193    | 6.11363   | 6.26871   | 6.61033 | 8.53963    | 8.24801    |
| UTY       | ?          | -6.45019  | 4.73534   | 4.59853 | -5.65305   | -5.69922   |
| UVRAG     | 4.2292     | 4.42503   | 3.74662   | 3.95726 | 3.10623    | 3.32119    |
| UVSSA     | 2.66507    | 2.41981   | 2.60439   | 2.52418 | 3.04705    | 2.52692    |
| UXS1      | 5.40876    | 5.91273   | 3.90393   | 4.5022  | 3.7512     | 4.19717    |
| UXT       | 2.98696    | 2.8161    | 1.94951   | 2.35812 | 2.77832    | 3.29858    |
| VAC14     | 3.6251     | 3.46641   | 3.74869   | 3.93966 | 4.52765    | 4.31704    |
| VAC14-AS1 | 0.0559175  | 0.2376    | 1.02599   | 1.12963 | 1.45867    | 0.578775   |
| VAMP1     | 2.30042    | 2.07731   | 3.43635   | 3.56191 | 2.66032    | 1.78067    |
| VAMP2     | 1.49078    | 1.38894   | 2.56132   | 2.46483 | 2.21007    | 2.04819    |
| VAMP3     | 4.55062    | 5.00169   | 5.03624   | 5.88764 | 5.35126    | 6.02672    |
| VAMP4     | 2.89525    | 3.06659   | 3.12709   | 3.15796 | 2.3227     | 2.65085    |
| VAMP5     | 0.243547   | -0.214764 | 2.54441   | 2.96532 | -5.07051   | -5.69922   |
| VAMP7     | 4.99615    | 4.98579   | 4.41265   | 5.01914 | 5.53934    | 5.95105    |
| VANGL1    | 5.42343    | 5.48003   | 5.20611   | 5.4841  | 6.09582    | 6.08809    |
| VANGL2    | 2.68895    | 2.10703   | -6.17309  | ?       | -6.64581   | -5.69922   |
| VAPA      | 5.15319    | 5.15413   | 5.8007    | 6.19069 | 6.66185    | 6.89808    |
| VAPB      | 5.87218    | 5.76204   | 5.31383   | 5.31427 | 5.39532    | 5.23652    |
| VARS      | 5.33777    | 5.02699   | 4.66117   | 4.89046 | 5.81414    | 5.74243    |
| VARS2     | 3.64926    | 3.41274   | 2.61164   | 2.74699 | 3.6945     | 3.63698    |
| VASH1     | 2.03099    | 1.66983   | 1.47289   | 1.51261 | -2.08446   | -2.50285   |
| VASH2     | 1.63634    | 1.64047   | 2.2002    | 1.76772 | -0.10558   | -0.799584  |
| VASN      | -1.69862   | -2.6546   | 3.55288   | 3.54939 | 0.172692   | 0.0483059  |
| VASP      | 4.42375    | 4.57333   | 3.938     | 4.23324 | 5.01431    | 5.56765    |
| VAT1      | 5.07158    | 4.83692   | 5.63105   | 6.10487 | 5.38509    | 5.11026    |
| VAT1L     | -4.37417   | -2.6546   | 0.73541   | 1.60545 | -2.85193   | 0.719622   |
| VAV2      | 3.26094    | 2.83408   | 2.94577   | 3.16963 | 3.20388    | 3.0041     |
| VAV3      | 0.735617   | 0.278722  | 4.02348   | 4.04472 | -6.64581   | ?          |
| VBP1      | 4.5689     | 4.54975   | 4.55373   | 5.00555 | 5.28328    | 6.10504    |
| VCAM1     | 0.0559314  | -1.41808  | 5.86088   | 5.71574 | -0.0163223 | -0.0918635 |
| VCAN      | 7.73861    | 7.88743   | 6.59268   | 6.18176 | 9.48937    | 9.57547    |
| VCL       | 6.75912    | 7.02879   | 7.429     | 7.79282 | 8.28189    | 8.18156    |
| VCP       | 7.73303    | 7.17143   | 7.60938   | 7.52333 | 9.0649     | 8.2693     |
| VCPIP1    | 4.61776    | 4.70079   | 5.32377   | 5.55161 | 5.19494    | 5.28267    |
| VCPKMT    | 1.88966    | 1.96344   | 1.12031   | 1.38307 | 1.62974    | 1.86317    |
| VDAC1     | 7.43007    | 7.60685   | 6.84197   | 7.39338 | 7.63522    | 7.76753    |
| VDAC1P1   | 4.83764    | 5.05576   | 4.20037   | 4.82502 | 5.02124    | 5.09753    |
| VDAC1P2   | 2.91079    | 3.10051   | 2.17088   | 2.89829 | 3.07452    | 3.40057    |
| VDAC1P6   | 2.16047    | 2.23701   | 1.55124   | 1.94208 | 2.2804     | 2.30651    |
| VDAC1P8   | -1.13126   | -1.26811  | 1.65311   | 1.71989 | 2.51377    | 2.11569    |
| VDAC2     | 4.13293    | 4.17797   | 3.77145   | 4.31897 | 4.8491     | 5.18046    |
| VDAC3     | 5.50088    | 5.66897   | 4.85607   | 5.40243 | 5.30434    | 5.92624    |
| VDAC3P1   | -0.0255147 | 0.433109  | -0.252626 | 0.19507 | -0.0590936 | 0.127052   |
| VDR       | 2.38308    | 2.45901   | 2.61739   | 3.78143 | 1.60651    | 1.53173    |
| VEGFA     | 4.49626    | 4.64476   | 5.0316    | 5.72116 | 6.99517    | 5.63508    |
| VEGFB     | 3.37642    | 3.26508   | 2.89864   | 2.83076 | 3.00502    | 2.96925    |

|          |          |          |           |           |           |           |
|----------|----------|----------|-----------|-----------|-----------|-----------|
| VEGFC    | 3.77665  | 3.47967  | 3.4275    | 3.79505   | 2.66613   | 2.89692   |
| VEPH1    | -4.11163 | -3.65369 | -0.628724 | -0.616766 | 0.885348  | 2.25166   |
| VEZFI    | 6.14188  | 6.12033  | 5.08964   | 5.30892   | 6.56641   | 6.39112   |
| VEZF1P1  | 0.540315 | 0.6515   | -0.251212 | 0.0447438 | 1.204     | 0.946424  |
| VEZT     | 4.89849  | 5.04395  | 5.12651   | 5.29311   | 5.1058    | 5.27199   |
| VGF      | 2.09536  | 1.614    | -1.86109  | -1.46458  | -2.33767  | -1.38442  |
| VGLL3    | 2.86317  | 2.85909  | -0.659745 | 0.248838  | -0.615709 | -0.848487 |
| VGLL4    | 5.47706  | 5.08853  | 4.29715   | 4.37484   | 5.48409   | 4.89049   |
| VHL      | 5.63322  | 5.5343   | 4.4531    | 4.44479   | 5.30362   | 4.48803   |
| VIM      | 9.34192  | 9.30194  | 7.98483   | 8.6496    | 10.3463   | 10.8048   |
| VIM-AS1  | 0.604783 | 0.357428 | -1.42826  | -1.02108  | 0.0866072 | 0.560157  |
| VIMP     | 4.68623  | 4.74171  | 3.97129   | 4.27163   | 4.38544   | 4.59479   |
| VIPAS39  | 3.0658   | 3.12024  | 2.66824   | 2.86559   | 3.35092   | 3.55773   |
| VKORC1   | 4.98347  | 4.8354   | 4.19804   | 4.55724   | 5.09884   | 5.0549    |
| VKORC1L1 | 4.90313  | 4.85624  | 4.83744   | 4.95785   | 4.80676   | 4.63531   |
| VLDLR    | 2.9138   | 2.96552  | 0.816542  | 0.82198   | 7.28524   | 7.21585   |
| VMA21    | 6.05517  | 6.06388  | 5.69107   | 6.00588   | 7.29496   | 7.06332   |
| VMAC     | 0.768595 | 0.331671 | 0.838911  | 0.978694  | 2.75544   | 2.08772   |
| VMP1     | 8.31763  | 8.26596  | 8.7446    | 8.82733   | 9.41249   | 9.36111   |
| VOPP1    | 5.66153  | 5.80901  | 6.14696   | 6.4676    | 6.38543   | 6.33385   |
| VPRBP    | 5.13681  | 5.15575  | 4.27299   | 4.54327   | 5.25286   | 4.97456   |
| VPS11    | 3.90362  | 3.84662  | 4.00506   | 4.331     | 3.84351   | 3.8188    |
| VPS13A   | 6.45608  | 6.50509  | 5.99698   | 6.01336   | 6.1456    | 6.07868   |
| VPS13B   | 5.35145  | 5.33237  | 6.30456   | 6.24981   | 6.08935   | 6.16632   |
| VPS13C   | 6.75969  | 6.67128  | 7.0501    | 7.01423   | 6.57509   | 6.81215   |
| VPS13D   | 6.40356  | 6.37101  | 6.28535   | 6.3815    | 6.28569   | 6.05648   |
| VPS16    | 4.09811  | 4.06737  | 4.10573   | 4.44258   | 3.49244   | 3.62664   |
| VPS18    | 4.10182  | 4.00883  | 3.56802   | 3.93283   | 4.14462   | 4.34585   |
| VPS25    | 4.71137  | 4.58768  | 4.27488   | 4.54581   | 5.00591   | 5.50212   |
| VPS26A   | 3.70818  | 3.65479  | 3.98766   | 4.13077   | 4.45408   | 4.77003   |
| VPS26B   | 3.98838  | 4.00758  | 4.23511   | 4.39695   | 4.9681    | 4.85376   |
| VPS28    | 3.50915  | 3.29037  | 3.19802   | 3.41277   | 3.44559   | 3.6813    |
| VPS29    | 4.43767  | 4.54908  | 4.28509   | 4.56713   | 4.55401   | 4.96127   |
| VPS33A   | 4.21179  | 4.30445  | 3.2529    | 3.67922   | 4.18515   | 4.49721   |
| VPS33B   | 3.13223  | 3.06659  | 2.79663   | 3.07853   | 3.03318   | 3.06808   |
| VPS35    | 5.68352  | 5.77792  | 6.15878   | 6.60174   | 6.78364   | 7.26664   |
| VPS36    | 4.7277   | 4.96759  | 3.93542   | 4.11033   | 4.15027   | 4.43157   |
| VPS37A   | 4.14003  | 3.94663  | 4.27636   | 4.49467   | 4.22679   | 4.20087   |
| VPS37B   | 4.27247  | 4.0341   | 2.78763   | 2.95143   | 4.20899   | 4.10654   |
| VPS37C   | 2.47835  | 2.45603  | 1.00636   | 1.18584   | 1.99076   | 1.78517   |
| VPS39    | 4.92159  | 4.84605  | 4.74424   | 4.99118   | 5.34356   | 5.1222    |
| VPS41    | 5.46707  | 5.56472  | 5.06737   | 5.32058   | 5.95049   | 6.2511    |
| VPS45    | 4.84345  | 4.86246  | 4.46663   | 4.74993   | 5.02881   | 5.32601   |
| VPS4A    | 5.09327  | 5.03095  | 4.94903   | 5.16226   | 6.25347   | 5.98416   |
| VPS4B    | 5.30267  | 5.17828  | 3.75899   | 4.06983   | 4.10041   | 3.8876    |
| VPS50    | 4.162    | 4.1592   | 4.52037   | 4.87914   | 3.91428   | 4.68882   |
| VPS51    | 3.90169  | 3.62391  | 3.31918   | 3.63114   | 3.7077    | 3.86508   |
| VPS52    | 3.81673  | 3.596    | 3.72963   | 3.85543   | 4.58407   | 4.48455   |
| VPS53    | 4.12213  | 4.04142  | 4.7061    | 4.97219   | 5.55473   | 4.99305   |
| VPS54    | 4.44302  | 4.43273  | 3.97886   | 4.09696   | 4.87496   | 5.18583   |
| VPS72    | 4.26506  | 4.18172  | 3.38732   | 3.60869   | 4.2844    | 4.53407   |
| VPS8     | 3.80673  | 3.90456  | 4.64857   | 4.70815   | 5.60001   | 6.03094   |

|         |           |            |           |           |           |          |
|---------|-----------|------------|-----------|-----------|-----------|----------|
| VPS9D1  | 1.63075   | 1.49321    | 1.65408   | 1.76137   | 1.37133   | 1.55905  |
| VRK1    | 4.76443   | 4.84776    | 3.23222   | 3.63769   | 3.43508   | 4.14348  |
| VRK2    | 3.22305   | 3.10169    | 2.78846   | 3.26501   | -0.959851 | -1.7242  |
| VRK3    | 2.67417   | 2.65351    | 3.2754    | 3.42645   | 3.6274    | 3.52966  |
| VSIG10  | 4.54508   | 4.59181    | 3.66647   | 3.95318   | 3.55812   | 3.76003  |
| VSNL1   | -0.721575 | -0.681268  | -0.482894 | -0.154483 | 2.84353   | 3.62868  |
| VTA1    | 4.46457   | 4.59853    | 4.32228   | 4.49015   | 5.74538   | 6.36304  |
| VTI1A   | 3.72403   | 3.6703     | 4.03806   | 4.21084   | 4.07101   | 4.05483  |
| VTI1B   | 4.82429   | 4.96345    | 4.01752   | 4.58643   | 5.34638   | 5.63673  |
| VWA5A   | 1.7968    | 1.67161    | -0.300715 | -0.301307 | -3.6585   | -3.38329 |
| VWA8    | 4.24416   | 4.27694    | 4.00507   | 4.09574   | 4.04619   | 4.16519  |
| VWA9    | 4.49383   | 4.456      | 4.09725   | 4.26185   | 4.21004   | 4.43666  |
| VWDE    | -0.654472 | -0.0197685 | -1.93506  | -1.52346  | 2.74484   | 3.01439  |
| WAC     | 6.04931   | 6.08813    | 5.81276   | 5.97098   | 6.17158   | 6.08036  |
| WAC-AS1 | 2.39767   | 2.47506    | 2.77695   | 2.98866   | 2.7152    | 2.72787  |
| WAPAL   | 5.93047   | 5.93723    | 5.64144   | 5.82338   | 6.16287   | 6.09255  |
| WARS    | 5.97439   | 5.73049    | 4.73807   | 5.37016   | 4.94158   | 5.04063  |
| WARS2   | 2.27791   | 2.33081    | 2.47287   | 2.42698   | 4.53893   | 4.72791  |
| WASF1   | 2.90825   | 2.89252    | 2.30031   | 2.43808   | 3.57809   | 3.18507  |
| WASF2   | 5.17491   | 4.92761    | 4.91548   | 4.91024   | 5.21055   | 4.76109  |
| WASF3   | -4.37417  | -4.13839   | 2.30835   | 2.28351   | 4.28294   | 4.17592  |
| WASF4P  | 1.23489   | 0.958806   | 0.799726  | 1.02808   | 1.07239   | 0.479189 |
| WASH1   | 2.17097   | 1.96751    | 1.64422   | 1.55761   | 2.96029   | 2.00976  |
| WASH2P  | 2.34287   | 2.11509    | 2.69028   | 2.57915   | 2.32159   | 1.44916  |
| WASH3P  | 2.4194    | 2.20316    | 2.80998   | 2.58228   | 2.89556   | 1.82963  |
| WASH5P  | 5.42173   | 5.26281    | 5.40171   | 5.37998   | 5.5923    | 4.59582  |
| WASH6P  | 3.0882    | 2.84557    | 3.91485   | 4.0846    | 3.3742    | 2.61159  |
| WASH7P  | 1.10293   | 0.790113   | 2.85675   | 3.12704   | 2.97876   | 1.74947  |
| WASL    | 4.92113   | 4.76957    | 4.67833   | 4.77839   | 4.80627   | 4.67698  |
| WBP1    | 3.49087   | 3.40806    | 3.71167   | 3.77118   | 3.65256   | 3.9431   |
| WBP11   | 5.39795   | 5.57292    | 4.75892   | 5.30684   | 4.55088   | 4.74535  |
| WBP1L   | 3.92571   | 2.77318    | 4.1926    | 3.68721   | 5.4198    | 4.06477  |
| WBP2    | 4.1002    | 3.9935     | 3.606     | 4.17541   | 4.31624   | 4.58445  |
| WBP4    | 2.8485    | 2.88773    | 2.55433   | 2.75679   | 3.14325   | 3.46322  |
| WBP5    | 4.26958   | 4.29788    | 4.72786   | 5.16378   | 4.75597   | 5.06641  |
| WBSCR16 | 4.57645   | 4.32912    | 4.29119   | 4.6097    | 4.88706   | 5.02799  |
| WBSCR22 | 4.78712   | 4.9968     | 4.50351   | 4.89863   | 4.94246   | 5.2124   |
| WDFY1   | 4.917     | 4.99862    | 5.37871   | 5.81894   | 5.48178   | 5.66397  |
| WDFY2   | 4.64632   | 4.68499    | 5.4321    | 5.27162   | 5.01696   | 4.55655  |
| WDFY3   | 5.63546   | 5.59753    | 5.89439   | 5.89611   | 6.47783   | 6.13265  |
| WDHD1   | 4.59324   | 4.73499    | 4.0247    | 4.28133   | 4.35581   | 4.5694   |
| WDPCP   | 3.14695   | 3.09762    | 2.42024   | 2.42271   | 2.49989   | 2.42777  |
| WDR1    | 6.5383    | 6.69098    | 6.05579   | 6.61973   | 7.85976   | 7.77025  |
| WDR11   | 5.31414   | 5.30442    | 5.29454   | 5.5376    | 5.73186   | 5.75884  |
| WDR12   | 4.87749   | 4.89405    | 3.4525    | 4.05432   | 5.08738   | 5.43007  |
| WDR13   | 3.74283   | 3.60324    | 2.8554    | 2.97599   | 2.71256   | 3.00754  |
| WDR17   | 2.21383   | 2.33159    | 2.21737   | 2.12001   | 2.76176   | 2.79712  |
| WDR18   | 3.14954   | 2.78509    | 2.40521   | 2.4799    | 2.67509   | 2.89692  |
| WDR19   | 3.58517   | 3.29204    | 3.8277    | 3.74603   | 3.77431   | 3.83244  |
| WDR20   | 3.8755    | 3.99577    | 2.77264   | 2.94646   | 3.40309   | 3.42515  |
| WDR24   | 1.3612    | 0.904912   | 2.10034   | 2.09715   | 1.24366   | 1.36832  |
| WDR25   | 1.54993   | 1.40499    | 0.436045  | 1.05667   | 1.25689   | 1.29333  |



|          |          |          |          |          |          |          |
|----------|----------|----------|----------|----------|----------|----------|
| WDR26    | 5.79049  | 5.79336  | 6.48181  | 6.3865   | 6.8344   | 6.84641  |
| WDR27    | 3.73971  | 3.75268  | 4.15521  | 4.08962  | 4.10704  | 3.79512  |
| WDR3     | 6.25762  | 6.38749  | 4.88791  | 5.27487  | 7.31089  | 7.57784  |
| WDR33    | 6.04427  | 5.93508  | 5.30856  | 5.40538  | 5.99923  | 5.85981  |
| WDR34    | 3.6727   | 3.34772  | 3.02594  | 3.33825  | 3.48689  | 4.13877  |
| WDR35    | 4.89662  | 5.03799  | 3.49066  | 3.70975  | 5.09499  | 5.28339  |
| WDR36    | 6.04979  | 6.32527  | 5.88321  | 6.26349  | 5.74481  | 5.83147  |
| WDR37    | 3.30233  | 3.20958  | 2.51346  | 2.6225   | 3.46123  | 3.22402  |
| WDR4     | 2.52252  | 2.30204  | 2.75312  | 2.68235  | 3.01918  | 2.46322  |
| WDR41    | 4.14238  | 4.23181  | 4.7766   | 5.06822  | 4.61659  | 5.21359  |
| WDR43    | 6.01558  | 6.09005  | 4.46032  | 4.96997  | 5.95047  | 6.08076  |
| WDR44    | 2.23758  | 2.50871  | 3.70825  | 3.81746  | 4.45018  | 4.56123  |
| WDR45    | 3.72861  | 3.60347  | 3.45112  | 3.81222  | 3.37007  | 3.64528  |
| WDR45B   | 5.5295   | 5.34083  | 4.92721  | 5.26531  | 6.86922  | 6.6237   |
| WDR45BP1 | 1.08703  | 1.22426  | 0.777763 | 1.04772  | 2.66831  | 2.08545  |
| WDR46    | 5.23865  | 5.27904  | 4.3043   | 4.82996  | 5.89594  | 6.06022  |
| WDR47    | 3.62284  | 3.95921  | 3.65882  | 4.08962  | 3.8245   | 4.08445  |
| WDR48    | 5.04196  | 5.17377  | 3.9026   | 4.16496  | 4.94099  | 5.20765  |
| WDR5     | 4.13372  | 4.06409  | 3.74624  | 3.88818  | 4.13461  | 3.87218  |
| WDR53    | 2.07573  | 2.19538  | 2.75018  | 3.0686   | 2.97631  | 3.17593  |
| WDR54    | 3.35077  | 3.37004  | 3.16742  | 3.5476   | 4.02268  | 3.99546  |
| WDR55    | 5.01071  | 5.11719  | 5.07829  | 5.363    | 5.63847  | 5.53363  |
| WDR59    | 4.09533  | 4.08982  | 3.89862  | 3.95187  | 3.45603  | 3.17593  |
| WDR5B    | 2.60699  | 2.70207  | 2.72037  | 3.01271  | 2.57811  | 2.63759  |
| WDR6     | 6.65008  | 6.77595  | 5.64268  | 5.84452  | 6.70754  | 6.53222  |
| WDR60    | 3.56184  | 3.47525  | 4.46931  | 4.31638  | 3.12596  | 2.43796  |
| WDR61    | 4.89935  | 4.80682  | 4.27475  | 4.64338  | 6.61825  | 7.26479  |
| WDR62    | 3.48207  | 3.2514   | 3.66039  | 3.76461  | 3.4754   | 3.04148  |
| WDR66    | 1.42206  | 1.33107  | 0.521191 | 1.07646  | 0.680243 | 1.02127  |
| WDR7     | 4.7979   | 4.84478  | 4.38861  | 4.48907  | 3.44235  | 3.51105  |
| WDR70    | 3.9014   | 3.86731  | 3.98445  | 4.16158  | 4.10703  | 4.11283  |
| WDR72    | 2.79278  | 3.03101  | -6.17309 | -5.10387 | -2.95876 | -3.12051 |
| WDR73    | 4.60564  | 4.71168  | 4.62297  | 4.83717  | 5.02944  | 4.93225  |
| WDR74    | 4.50124  | 4.62038  | 3.50688  | 3.888    | 4.05852  | 4.4342   |
| WDR75    | 4.95871  | 5.06315  | 4.23958  | 4.52235  | 5.11981  | 5.83243  |
| WDR76    | 4.65847  | 4.63715  | 4.34688  | 4.48456  | 4.53813  | 4.42899  |
| WDR77    | 4.82835  | 4.90988  | 3.9787   | 4.51301  | 5.13119  | 5.38935  |
| WDR81    | 3.60805  | 3.32343  | 3.38858  | 3.35913  | 3.4725   | 3.57171  |
| WDR82    | 6.07404  | 6.0581   | 5.40597  | 5.56532  | 6.43173  | 6.23391  |
| WDR82P1  | 1.16275  | 1.33299  | 0.670532 | 0.589505 | 1.61761  | 1.277    |
| WDR83    | 1.45429  | 1.24373  | 0.896807 | 1.13204  | 1.66963  | 1.71498  |
| WDR83OS  | 4.81016  | 4.87858  | 4.2798   | 4.72793  | 5.60142  | 5.9515   |
| WDR89    | 3.40814  | 3.51872  | 2.12028  | 2.30482  | 3.3241   | 3.95149  |
| WDR90    | 2.65978  | 2.35192  | 2.79448  | 2.93285  | 2.41229  | 1.65964  |
| WDR91    | 3.55832  | 3.29525  | 3.18331  | 3.02501  | 3.18951  | 2.74524  |
| WDR92    | 2.33062  | 2.61105  | 2.60344  | 2.88491  | 2.39068  | 2.28702  |
| WDSUB1   | 1.84784  | 1.73686  | 1.43857  | 1.34243  | 1.92091  | 1.97981  |
| WDTC1    | 3.63407  | 3.37636  | 3.07151  | 3.10307  | 3.70492  | 3.38604  |
| WDYHV1   | 2.11472  | 1.63522  | 2.09262  | 2.1904   | 2.60883  | 2.65524  |
| WEE1     | 5.12189  | 5.09222  | 5.03261  | 4.91145  | 5.36965  | 5.33357  |
| WFDC21P  | -3.37567 | -2.76144 | 2.88919  | 3.85288  | -2.75246 | -2.53597 |
| WFS1     | 3.00483  | 2.64045  | 3.9939   | 4.17078  | 3.04013  | 3.05484  |

|               |           |            |           |           |            |          |
|---------------|-----------|------------|-----------|-----------|------------|----------|
| WHAMM         | 2.76241   | 2.59628    | 2.47113   | 2.77948   | 2.51213    | 2.06149  |
| WHAMMP2       | -6.66845  | -5.88982   | 1.66534   | 1.69972   | -2.00106   | -3.17887 |
| WHAMMP3       | ?         | -7.18483   | 1.91141   | 1.84334   | 1.02901    | 0.134221 |
| WHSC1         | 6.96288   | 7.09113    | 6.61473   | 6.72364   | 7.18074    | 6.86409  |
| WHSC1L1       | 5.96679   | 5.95433    | 6.08273   | 6.15992   | 5.95687    | 5.71787  |
| WI2-1896O14.1 | -1.99982  | -2.29967   | -1.42761  | -0.123714 | 0.0173091  | 1.92559  |
| WIBG          | 2.66667   | 2.86359    | 2.41268   | 2.77076   | 2.73416    | 2.88173  |
| WIPF1         | 4.2346    | 4.036      | 3.14515   | 3.14148   | 4.36896    | 4.31704  |
| WIPF2         | 3.53813   | 3.54978    | 3.86223   | 4.04473   | 4.88416    | 4.49907  |
| WIPI1         | 2.87219   | 2.56055    | 3.28806   | 3.95792   | 2.73405    | 3.58861  |
| WIPI2         | 5.01086   | 4.72574    | 5.08618   | 5.21309   | 5.15986    | 5.01095  |
| WISP1         | -6.42303  | -4.19658   | 4.13835   | 4.89187   | -0.66265   | -3.12811 |
| WIZ           | 2.43022   | 2.33483    | 2.693     | 2.70817   | 2.96174    | 3.05816  |
| WLS           | 5.6211    | 5.83474    | 2.01126   | 2.56361   | 5.56544    | 5.88049  |
| WNK1          | 6.7863    | 6.80549    | 6.73344   | 6.75746   | 6.31538    | 6.11783  |
| WNK3          | 4.04827   | 4.26167    | -1.59814  | -2.20128  | 2.32554    | 2.27058  |
| WNK4          | 3.44318   | 3.27994    | -0.99927  | -1.2905   | -2.43335   | -4.01094 |
| WNT2B         | 2.03406   | 2.29291    | 2.03783   | 2.13041   | 4.12074    | 3.32638  |
| WNT3          | 1.44051   | 0.570657   | 1.70525   | 1.64609   | 0.558944   | 0.247587 |
| WNT5A         | 5.73189   | 5.3074     | 7.38537   | 7.71791   | 4.78779    | 5.31841  |
| WNT5B         | 0.0824028 | -0.177294  | 4.41917   | 4.74291   | 3.48943    | 3.96218  |
| WRAP53        | 3.24952   | 3.36536    | 3.3381    | 3.60407   | 3.5763     | 3.57688  |
| WRAP73        | 3.8507    | 3.58154    | 2.72338   | 2.84828   | 4.29315    | 4.19264  |
| WRB           | 3.33191   | 3.35211    | 4.10255   | 4.38906   | 3.12454    | 3.54317  |
| WRN           | 3.58515   | 3.6286     | 3.98012   | 4.20632   | 3.959      | 4.28622  |
| WRNIP1        | 4.41008   | 4.39747    | 4.56633   | 4.53502   | 4.67397    | 4.5257   |
| WSB1          | 5.23202   | 5.17469    | 6.98812   | 6.72089   | 6.69573    | 5.67374  |
| WSB2          | 6.2825    | 6.46209    | 3.85996   | 4.43729   | 6.0251     | 6.64947  |
| WSCD1         | -5.10914  | -4.13839   | -3.59683  | -3.52222  | 4.84005    | 5.02799  |
| WTAP          | 5.95303   | 5.43969    | 4.80853   | 5.22624   | 5.81415    | 5.92599  |
| WTIP          | 1.11475   | 0.195474   | 2.09262   | 1.71138   | -0.510264  | -1.70626 |
| WWC1          | 2.65408   | 2.86808    | 1.51695   | 2.26188   | 3.46381    | 3.54831  |
| WWC2          | 5.16479   | 5.19507    | 5.27219   | 5.44338   | 5.55823    | 5.296    |
| WWC3          | 2.86317   | 2.9122     | 4.62945   | 4.83807   | 1.45867    | 0.965773 |
| WWOX          | 1.27825   | 1.03706    | 2.16964   | 2.31745   | 1.31701    | 1.54125  |
| WWP1          | 3.66336   | 3.64727    | 4.12777   | 4.12912   | 3.87139    | 4.05844  |
| WWP1P1        | 0.454997  | 0.356752   | 0.742308  | 0.836538  | 0.556199   | 0.522116 |
| WWP2          | 5.5366    | 5.15828    | 3.60927   | 3.77229   | 4.74109    | 4.5281   |
| WWTR1         | 6.87846   | 6.87381    | 5.90921   | 5.91702   | 6.78007    | 6.59033  |
| XAB2          | 3.6251    | 3.44103    | 3.18935   | 3.23103   | 3.60296    | 3.53407  |
| XAF1          | -10.9684  | -3.87578   | 3.91537   | 3.94111   | 4.20784    | 3.70506  |
| XAGE1A        | 4.28424   | 4.15791 ?  |           | -5.51725  | -7.63143 ? |          |
| XAGE1B        | 3.77821   | 4.12436 ?  |           | -5.51725  | -7.63143 ? |          |
| XBP1          | 5.9953    | 5.82742    | 5.51519   | 5.81002   | 5.11323    | 5.11505  |
| XIAP          | 4.10825   | 3.9455     | 4.99719   | 4.97678   | 6.10678    | 5.62961  |
| XK            | -2.9975   | -3.65369 ? |           |           | 1.18523    | 1.25912  |
| XKR4          | -0.865939 | -2.00285   | -6.17309  | -5.10387  | 3.67284    | 3.6856   |
| XKR6          | 0.96632   | 0.831845   | 1.45314   | 1.21315   | 1.22848    | 0.597145 |
| XKR8          | 1.89714   | 1.62465    | -0.482896 | -0.380732 | 2.68177    | 2.74038  |
| XPA           | 1.93757   | 1.9035     | 2.02107   | 2.01014   | 1.78266    | 1.6062   |
| XPC           | 4.96482   | 5.17659    | 3.98141   | 4.48572   | 3.8618     | 3.84808  |
| XPNPEP1       | 4.56007   | 4.62792    | 4.71734   | 5.039     | 4.76228    | 4.7414   |

|                  |           |           |           |           |            |            |
|------------------|-----------|-----------|-----------|-----------|------------|------------|
| XPNPEP3          | 4.31931   | 4.45008   | 4.53129   | 4.88935   | 4.28575    | 4.18897    |
| XPO1             | 7.59989   | 7.65965   | 7.24529   | 7.45011   | 7.73011    | 7.98481    |
| XPO4             | 5.52941   | 5.57578   | 5.05904   | 5.34804   | 5.45802    | 5.39264    |
| XPO5             | 5.97089   | 5.97115   | 5.08383   | 5.23424   | 6.12854    | 5.85357    |
| XPO6             | 5.70646   | 5.65187   | 5.61127   | 5.89243   | 5.84411    | 5.66934    |
| XPO7             | 5.66664   | 5.67641   | 5.13727   | 5.41521   | 5.36133    | 5.50943    |
| XPOT             | 6.6725    | 6.83278   | 5.52726   | 5.99905   | 6.67421    | 6.96696    |
| XPOTP1           | 3.19069   | 3.45792   | 2.08223   | 2.63312   | 3.20644    | 3.45224    |
| XPR1             | 5.48671   | 5.65511   | 5.34541   | 5.61226   | 5.49354    | 5.57579    |
| XRCC1            | 3.9953    | 4.07399   | 3.49743   | 3.8683    | 3.37832    | 3.17593    |
| XRCC2            | 5.46144   | 5.49097   | 5.29725   | 5.386     | 5.23941    | 4.42642    |
| XRCC3            | 3.77041   | 3.51171   | 2.89177   | 3.11108   | 3.28167    | 3.07589    |
| XRCC4            | 2.26094   | 2.43501   | 3.06441   | 3.15092   | 2.62972    | 3.6107     |
| XRCC5            | 8.0605    | 8.10464   | 7.7221    | 8.09814   | 8.22531    | 8.74772    |
| XRCC6            | 7.53717   | 7.58509   | 7.20586   | 7.64435   | 7.39132    | 7.62315    |
| XRCC6BP1         | 0.171399  | 0.479758  | 1.43123   | 1.8454    | -0.0454657 | 1.1637     |
| XRCC6P2          | 4.59816   | 4.79757   | 4.36388   | 4.74169   | 4.54753    | 4.58834    |
| XRN1             | 4.9817    | 5.0083    | 6.21761   | 6.47778   | 4.97267    | 4.88667    |
| XRN2             | 7.16045   | 7.16375   | 6.54031   | 6.91062   | 6.36442    | 6.65448    |
| XRRA1            | 3.64556   | 3.71574   | 4.28667   | 4.40324   | 2.24915    | 1.93955    |
| XX-FW83563B9.5   | 1.20281   | 0.846995  | 1.13775   | 1.17718   | 1.51648    | 1.20387    |
| XXYLT1           | 3.57587   | 3.43046   | 4.00877   | 3.89118   | 4.0659     | 3.62421    |
| XXbac-B461K10.4  | 4.54207   | 4.24304   | 2.21759   | 1.86274   | 3.35984    | 2.96833    |
| XXbac-B476C20.13 | 1.6585    | 1.52019   | -2.01303  | -2.10822  | -0.250761  | -0.706491  |
| XXbac-B476C20.9  | 0.708364  | 0.547677  | -0.558047 | -0.688718 | -0.0893947 | -0.144621  |
| XXbac-B562F10.11 | 1.77542   | 1.86239   | 1.79749   | 1.58472   | 1.0641     | 0.707304   |
| XXbac-BPG246D15  | 2.14813   | 0.660637  | -1.15985  | -0.639809 | -1.85672   | -0.857059  |
| XXbac-BPG248L24. | -0.207288 | -0.809694 | 1.94184   | 2.22506   | 0.493535   | 0.639566   |
| XXbac-BPG252P9.9 | 3.59577   | 3.5477    | 3.20359   | 3.78275   | 3.59845    | 3.4806     |
| XXbac-BPG283O16  | 2.34259   | 2.47086   | 3.14516   | 3.0586    | 3.52827    | 3.66397    |
| XXbac-BPGBPG55C  | 0.951647  | 0.713995  | 1.3456    | 1.29229   | 0.630899   | -0.0694897 |
| XXyac-YRM2039.3  | 2.17699   | 2.39893   | 2.6746    | 2.57082   | 2.46571    | 2.31071    |
| XYLB             | 3.40684   | 3.50868   | 0.623914  | 0.857026  | -5.07051 ? |            |
| XYLT1            | ?         | -6.45019  | 2.89174   | 3.29483 ? |            | -5.69922   |
| XYLT2            | 4.68083   | 4.45452   | 5.01185   | 4.9017    | 4.85292    | 4.5076     |
| YAE1D1           | 3.18968   | 3.36212   | 3.08566   | 3.21913   | 3.15523    | 3.63091    |
| YAF2             | 3.94296   | 4.04989   | 3.9276    | 3.81301   | 2.91334    | 2.71115    |
| YAP1             | 4.53273   | 4.48624   | 6.1384    | 6.39251   | 5.59587    | 5.33493    |
| YARS             | 5.93227   | 6.028     | 5.38299   | 5.93978   | 6.25928    | 5.99155    |
| YARS2            | 3.74179   | 3.76477   | 2.78227   | 2.81599   | 2.84154    | 3.21513    |
| YBEY             | 0.159022  | 0.305445  | 1.59787   | 1.56363   | 1.43248    | 1.48315    |
| YBX1             | 7.45653   | 7.47747   | 7.23211   | 7.62976   | 8.10149    | 8.10453    |
| YBX1P1           | 6.31241   | 6.23393   | 6.05775   | 6.4508    | 6.80241    | 6.84038    |
| YBX1P10          | 5.55159   | 5.55863   | 5.28408   | 5.65055   | 6.14514    | 6.20684    |
| YBX1P2           | 4.04931   | 4.10125   | 3.83815   | 4.11901   | 4.68531    | 4.54783    |
| YBX3             | 6.25208   | 6.29818   | 5.27482   | 5.44839   | 5.35161    | 5.35665    |
| YDJC             | 2.44559   | 2.31196   | 1.32432   | 1.87419   | 2.0879     | 2.54122    |
| YEATS2           | 5.19301   | 5.19242   | 5.83291   | 5.96868   | 6.64282    | 5.96642    |
| YEATS2-AS1       | 1.15398   | 1.48326   | 2.25983   | 2.18066   | 2.53701    | 1.51631    |
| YEATS4           | 3.58053   | 3.68563   | 1.37111   | 1.86848   | 2.93961    | 3.49051    |
| YES1             | 5.07151   | 4.94024   | 5.43598   | 5.68193   | 6.53805    | 6.47841    |
| YES1P1           | -0.460413 | -0.160947 | 0.388686  | 0.340517  | 1.32961    | 1.30204    |

|           |            |           |           |            |           |            |
|-----------|------------|-----------|-----------|------------|-----------|------------|
| YIF1A     | 3.67123    | 3.55539   | 3.36267   | 3.93763    | 3.2116    | 3.95149    |
| YIF1B     | 2.95377    | 2.80161   | 3.34786   | 3.81895    | 3.39226   | 4.16211    |
| YIPF1     | 3.10505    | 3.01289   | 3.3768    | 3.54581    | 3.73736   | 3.92265    |
| YIPF2     | 3.26018    | 3.13917   | 3.19682   | 3.54121    | 4.02726   | 4.43306    |
| YIPF3     | 4.43341    | 4.52441   | 4.35369   | 4.89539    | 5.33156   | 5.42321    |
| YIPF4     | 5.25512    | 5.37949   | 4.22268   | 4.49849    | 5.19571   | 5.47069    |
| YIPF5     | 4.93302    | 4.96026   | 5.4787    | 5.84715    | 5.40242   | 5.62028    |
| YIPF6     | 5.13656    | 5.3581    | 5.15799   | 5.67376    | 5.8492    | 6.3455     |
| YJEFN3    | -0.113528  | -0.525299 | 0.511428  | -0.0156352 | 0.81189   | -0.682796  |
| YKT6      | 5.69273    | 5.7836    | 5.65409   | 6.15239    | 6.41798   | 6.56121    |
| YLPM1     | 5.5602     | 5.50209   | 5.06083   | 4.89725    | 5.09397   | 4.81158    |
| YME1L1    | 6.30913    | 6.4581    | 5.87292   | 6.22919    | 6.72238   | 7.02125    |
| YOD1      | 5.03231    | 4.97413   | 4.29004   | 4.39175    | 5.17726   | 4.91519    |
| YPEL2     | 3.80275    | 3.41368   | 2.18282   | 2.23549    | 0.740643  | 0.401903   |
| YPEL3     | 1.19257    | 0.355118  | 0.636738  | 0.333515   | 0.92024   | 0.428496   |
| YPEL4     | -0.865939  | -1.14061  | 2.27592   | 1.86848    | -0.756662 | -1.38762   |
| YPEL5     | 3.68678    | 3.66386   | 3.97382   | 4.37297    | 4.15747   | 4.28197    |
| YRDC      | 4.08457    | 4.22723   | 2.40557   | 2.84665    | 4.73553   | 5.07224    |
| YTHDC1    | 5.22426    | 5.19358   | 4.78226   | 4.92528    | 5.54853   | 5.11665    |
| YTHDC2    | 5.12587    | 5.1569    | 4.8242    | 4.75844    | 5.24543   | 4.99891    |
| YTHDF1    | 5.42148    | 5.42513   | 4.73011   | 5.10305    | 5.29896   | 5.02545    |
| YTHDF2    | 6.1083     | 6.1309    | 5.41795   | 5.70978    | 5.91321   | 5.95608    |
| YTHDF3    | 5.24049    | 5.29704   | 5.6214    | 5.70734    | 5.34109   | 5.2777     |
| YWHAB     | 7.51434    | 7.34592   | 7.29047   | 7.47003    | 7.41483   | 7.33082    |
| YWHABP2   | 1.13721    | 1.20254   | 0.783331  | 1.02093    | 1.04711   | 0.494395   |
| YWHAE     | 7.07226    | 6.96168   | 7.37192   | 7.65896    | 8.03827   | 8.26506    |
| YWHAEP1   | -0.421059  | 0.0873949 | 0.0450934 | 0.418503   | 0.604603  | 0.832574   |
| YWHAEP5   | 1.4047     | 1.39995   | 1.97192   | 2.27984    | 2.7312    | 2.28311    |
| YWHAG     | 7.26181    | 7.2561    | 7.22413   | 7.61108    | 7.86892   | 7.84185    |
| YWHAH     | 5.65383    | 5.69669   | 5.00754   | 5.41131    | 5.6551    | 5.52209    |
| YWHAQ     | 7.33732    | 7.42913   | 6.89347   | 7.29626    | 8.20207   | 8.45284    |
| YWHAZ     | 8.40249    | 8.42555   | 8.2913    | 8.65566    | 8.41153   | 8.36329    |
| YWHAZP2   | 2.76813    | 2.86809   | 2.73859   | 3.17876    | 2.8459    | 2.75206    |
| YWHAZP3   | 4.81365    | 4.92126   | 4.78474   | 5.09202    | 4.7108    | 4.90971    |
| YWHAZP4   | 1.96837    | 1.85396   | 1.81395   | 2.07681    | 1.63768   | 1.93589    |
| YWHAZP5   | 0.25141    | 0.935535  | 0.587528  | 1.01143    | 0.777014  | 0.709838   |
| YY1       | 5.9036     | 5.95762   | 5.22374   | 5.48315    | 5.85339   | 5.84643    |
| YY1AP1    | 4.8649     | 4.77114   | 4.47026   | 4.70274    | 4.95975   | 4.73183    |
| YY2       | 0.541683   | 0.547302  | 1.55053   | 1.2369     | 0.660719  | -0.0239546 |
| Y_RNA     | 0.994464   | 1.23033   | 0.759062  | 0.973553   | 1.51223   | 0.993783   |
| ZACN      | 2.339      | 1.83834   | 1.94187   | 2.1433     | 2.31971   | 1.32027    |
| ZADH2     | 5.0335     | 5.42665   | 3.57136   | 4.04473    | 3.09458   | 3.76089    |
| ZBED1     | 3.66724    | 3.53432   | 4.15187   | 4.37196    | 3.72231   | 3.60163    |
| ZBED3     | 1.60359    | 1.44806   | 0.804582  | 0.964369   | 1.78209   | 1.31009    |
| ZBED3-AS1 | 0.367997   | 0.395534  | -0.349094 | -0.260942  | 0.607749  | -0.13007   |
| ZBED4     | 5.18508    | 5.05383   | 5.01246   | 4.95726    | 4.45277   | 3.82076    |
| ZBED5     | 4.43144    | 4.46922   | 4.40774   | 4.52579    | 4.01814   | 4.32945    |
| ZBED5-AS1 | -0.0541212 | -0.527101 | 0.96902   | 1.19692    | -0.611892 | -0.799586  |
| ZBED6     | 6.38569    | 6.32832   | 6.03098   | 6.11294    | 5.84195   | 5.66988    |
| ZBED8     | 1.96983    | 2.10703   | 2.8305    | 2.7677     | 2.00859   | 2.3377     |
| ZBED9     | -0.094911  | -0.13631  | 1.55784   | 1.67968    | 2.32682   | 3.18439    |
| ZBTB1     | 4.44236    | 4.51154   | 4.30411   | 4.30797    | 4.47339   | 4.60161    |

|            |           |           |            |          |          |           |
|------------|-----------|-----------|------------|----------|----------|-----------|
| ZBTB10     | 4.82201   | 4.87421   | 4.00753    | 3.76769  | 4.32126  | 3.84018   |
| ZBTB11     | 4.93585   | 5.11104   | 4.70094    | 4.93835  | 4.78606  | 4.9199    |
| ZBTB11-AS1 | 0.920949  | 0.863463  | 0.669635   | 0.998809 | 0.332725 | 0.200203  |
| ZBTB12     | 0.855575  | 0.503023  | 0.558023   | 0.749131 | 0.246688 | 0.334168  |
| ZBTB14     | 2.65408   | 2.66645   | 2.91188    | 2.97333  | 2.97813  | 3.23287   |
| ZBTB17     | 2.29246   | 2.15923   | 2.85266    | 3.0611   | 3.03318  | 2.94075   |
| ZBTB18     | 4.1828    | 4.19359   | 4.0821     | 4.12957  | 4.51212  | 4.60277   |
| ZBTB2      | 3.46959   | 3.57607   | 3.24902    | 3.60198  | 4.16782  | 4.42771   |
| ZBTB20     | 2.73663   | 2.33483   | 4.6581     | 4.14142  | 4.69316  | 3.92082   |
| ZBTB21     | 4.2168    | 4.3928    | 4.37201    | 4.81384  | 3.90669  | 4.02799   |
| ZBTB22     | 2.32053   | 2.33158   | 2.27182    | 2.60543  | 2.96357  | 2.86694   |
| ZBTB24     | 3.55739   | 3.7039    | 3.19656    | 3.35537  | 4.18194  | 3.95658   |
| ZBTB25     | 3.7549    | 3.95578   | 3.15067    | 3.1812   | 3.59569  | 3.17425   |
| ZBTB26     | 3.15734   | 3.27186   | 2.88258    | 2.97599  | 2.75966  | 2.77307   |
| ZBTB3      | 1.40425   | 1.29209   | 1.15638    | 1.27492  | 1.13416  | 1.29333   |
| ZBTB33     | 3.79477   | 3.898     | 4.32723    | 4.62503  | 4.92133  | 5.26049   |
| ZBTB34     | 3.8097    | 3.73313   | 3.27796    | 3.45341  | 3.24658  | 2.95507   |
| ZBTB37     | 5.31457   | 5.41289   | 4.59043    | 4.38302  | 5.48339  | 5.40702   |
| ZBTB38     | 6.87915   | 7.06033   | 6.3073     | 6.67883  | 6.38527  | 6.46101   |
| ZBTB39     | 3.08883   | 3.24106   | 3.3653     | 3.47989  | 2.97813  | 2.66833   |
| ZBTB4      | 4.14954   | 3.86919   | 4.99514    | 5.04788  | 5.47985  | 5.16979   |
| ZBTB40     | 5.20779   | 5.01792   | 5.26924    | 5.20177  | 5.15466  | 4.58329   |
| ZBTB41     | 4.14955   | 4.83232   | 4.07268    | 4.78522  | 4.44099  | 5.4831    |
| ZBTB42     | 1.02889   | 0.676782  | 0.191626   | 0.176693 | 0.246688 | 1.00759   |
| ZBTB43     | 3.92936   | 3.95394   | 3.83884    | 4.032    | 4.03924  | 3.66615   |
| ZBTB44     | 5.3528    | 5.35733   | 4.33316    | 4.35468  | 5.14017  | 5.04399   |
| ZBTB45     | 0.595618  | 0.292146  | 0.759062   | 0.698601 | 0.661695 | 0.443129  |
| ZBTB46     | 2.36702   | 1.98012   | 3.4382     | 2.93808  | 1.10733  | 0.443129  |
| ZBTB47     | 2.20482   | 2.05288   | 0.82777    | 1.35882  | 1.8195   | 2.70693   |
| ZBTB48     | 3.30655   | 3.27862   | 2.82491    | 2.83076  | 3.6053   | 3.42515   |
| ZBTB49     | 1.9303    | 2.02501   | 1.22592    | 1.37503  | 1.97271  | 1.73626   |
| ZBTB5      | 3.6986    | 3.85456   | 3.50823    | 3.75226  | 4.87204  | 4.84306   |
| ZBTB6      | 3.50548   | 3.72574   | 2.92239    | 3.15092  | 3.73201  | 4.11187   |
| ZBTB7A     | 2.7251    | 2.73683   | 2.49948    | 2.53864  | 2.92278  | 2.9515    |
| ZBTB7B     | 3.51281   | 3.25483   | 3.42381    | 3.62926  | 4.73843  | 4.54003   |
| ZBTB8A     | 1.95541   | 2.08727   | 1.45086    | 1.89823  | 1.89112  | 2.08411   |
| ZBTB8B     | 1.33811   | 1.16701   | -0.686025  | -1.10677 | -0.45167 | -0.669208 |
| ZBTB8OS    | 2.95203   | 2.94664   | 2.72123    | 2.96645  | 3.82041  | 4.23989   |
| ZBTB8OSP2  | 0.538836  | 0.498567  | -0.0235484 | 0.782618 | 1.37552  | 2.11786   |
| ZBTB9      | 2.58096   | 2.69635   | 2.04893    | 2.13094  | 3.53745  | 3.66479   |
| ZC2HC1A    | 1.77595   | 1.98399   | 3.12937    | 2.97332  | 2.14061  | 1.87767   |
| ZC3H10     | 3.31405   | 3.21415   | 2.66436    | 2.67961  | 2.47743  | 2.50386   |
| ZC3H11A    | 7.50508   | 7.53521   | 7.04437    | 7.18746  | 7.26297  | 7.03419   |
| ZC3H11B    | 3.26462   | 3.33418   | 2.73202    | 2.97881  | 3.1051   | 2.84136   |
| ZC3H12A    | 3.7345    | 3.62594   | 3.45673    | 3.97465  | 2.36761  | 2.22404   |
| ZC3H12B    | -0.113974 | -0.195907 | 0.53081    | 0.57776  | 0.766027 | 0.832509  |
| ZC3H12C    | 3.70179   | 4.0139    | 4.3361     | 5.10366  | 3.79399  | 3.971     |
| ZC3H13     | 5.9314    | 5.89142   | 5.72898    | 5.75921  | 5.74241  | 5.32533   |
| ZC3H14     | 5.76181   | 5.78934   | 4.61955    | 4.90001  | 5.20805  | 5.35496   |
| ZC3H15     | 5.47927   | 5.54066   | 4.4889     | 4.96529  | 5.93331  | 6.50853   |
| ZC3H18     | 4.58401   | 4.47158   | 4.12595    | 4.16146  | 3.72014  | 3.61971   |
| ZC3H3      | 1.69327   | 1.44408   | 2.11112    | 2.23104  | 1.48439  | 1.73626   |

|           |          |          |          |          |            |           |
|-----------|----------|----------|----------|----------|------------|-----------|
| ZC3H4     | 4.35007  | 4.09271  | 3.84852  | 3.71771  | 3.92651    | 3.81292   |
| ZC3H6     | 3.13223  | 2.59786  | 3.96495  | 3.77992  | 3.0608     | 2.26485   |
| ZC3H7A    | 5.0558   | 4.90402  | 4.7398   | 4.82264  | 4.70381    | 4.44809   |
| ZC3H7B    | 4.99701  | 5.0305   | 5.37728  | 5.57328  | 5.66104    | 5.5856    |
| ZC3H8     | 3.29952  | 3.30203  | 2.54441  | 2.44193  | 3.00325    | 2.98329   |
| ZC3HAV1   | 5.40223  | 5.34731  | 5.67288  | 5.76577  | 6.16263    | 5.83774   |
| ZC3HAV1L  | 1.60474  | 1.9252 ? |          | -5.10387 | -6.64581 ? |           |
| ZC3HC1    | 3.81365  | 3.78745  | 3.26149  | 3.43614  | 3.68176    | 3.78313   |
| ZC4H2     | -3.69722 | -3.00228 | 2.89063  | 2.99184  | 2.4351     | 2.47817   |
| ZCCHC10   | 2.94475  | 3.00266  | 3.09028  | 3.29844  | 3.6582     | 3.98148   |
| ZCCHC11   | 5.52671  | 5.56747  | 5.82839  | 5.71014  | 5.3295     | 5.20016   |
| ZCCHC14   | 4.37573  | 4.26764  | 4.51084  | 4.32891  | 3.92373    | 3.6398    |
| ZCCHC17   | 5.00781  | 4.85447  | 3.52472  | 3.93451  | 4.34015    | 4.71148   |
| ZCCHC2    | 3.86602  | 3.86132  | 2.74426  | 3.38303  | 2.13413    | 2.28199   |
| ZCCHC24   | 4.28861  | 4.20702  | 4.83431  | 5.14895  | 1.68713    | 1.9028    |
| ZCCHC3    | 3.4392   | 3.3103   | 3.87311  | 3.91493  | 3.14866    | 2.80899   |
| ZCCHC4    | 2.60243  | 2.58701  | 2.31634  | 2.38304  | 3.23299    | 3.24748   |
| ZCCHC5    | ? ?      |          | -1.42826 | -1.15432 | 0.529601   | 1.17598   |
| ZCCHC6    | 4.61438  | 4.67158  | 4.30532  | 4.50034  | 4.75911    | 4.75067   |
| ZCCHC7    | 3.5828   | 3.65998  | 3.25735  | 3.38301  | 3.94608    | 4.14815   |
| ZCCHC8    | 4.37237  | 4.33805  | 3.79089  | 3.92459  | 4.22462    | 4.07136   |
| ZCCHC9    | 3.78171  | 3.75268  | 3.925    | 4.08961  | 4.35579    | 4.33631   |
| ZCRB1     | 3.87589  | 3.86107  | 3.79171  | 3.97218  | 3.73655    | 4.17732   |
| ZDBF2     | 4.76546  | 4.64306  | 4.89195  | 4.98921  | 5.98016    | 5.87589   |
| ZDHHC12   | 2.49815  | 2.19539  | 2.34787  | 2.48738  | 2.48945    | 2.83245   |
| ZDHHC13   | 3.55359  | 3.58837  | 3.35564  | 3.65438  | 3.45343    | 4.25763   |
| ZDHHC14   | 2.63855  | 2.79691  | 1.71133  | 1.79809  | 1.90957    | 1.72795   |
| ZDHHC16   | 3.82153  | 4.02197  | 4.13953  | 4.568    | 4.16305    | 4.55889   |
| ZDHHC17   | 4.64577  | 4.75025  | 4.61656  | 4.74525  | 4.42846    | 4.38471   |
| ZDHHC18   | 4.21006  | 4.24278  | 3.43486  | 3.83369  | 3.9979     | 3.94253   |
| ZDHHC2    | -3.5275  | -3.29152 | 4.02715  | 4.26512  | 5.32694    | 5.72739   |
| ZDHHC20   | 6.4391   | 6.48316  | 6.01023  | 6.33052  | 5.51725    | 5.69483   |
| ZDHHC20P4 | 1.95366  | 2.1759   | 1.61918  | 2.1337   | 1.24388    | 1.69176   |
| ZDHHC21   | 4.67106  | 4.89305  | 1.05494  | 1.15801  | 6.01762    | 5.57694   |
| ZDHHC23   | 2.97158  | 3.33158  | 1.57806  | 2.1152   | 2.98895    | 3.47319   |
| ZDHHC24   | 2.61404  | 2.47184  | 2.81754  | 3.17014  | 2.55418    | 2.87252   |
| ZDHHC3    | 5.00912  | 5.08067  | 4.52297  | 4.97398  | 5.17889    | 5.18126   |
| ZDHHC4    | 4.04911  | 3.71332  | 3.24692  | 3.36488  | 4.58934    | 4.92536   |
| ZDHHC5    | 5.53841  | 5.44819  | 5.59248  | 5.78559  | 5.8943     | 6.0084    |
| ZDHHC6    | 4.30413  | 4.52156  | 3.67816  | 4.04632  | 3.97282    | 4.55184   |
| ZDHHC7    | 5.10867  | 5.25182  | 5.33954  | 5.76345  | 4.6616     | 4.38867   |
| ZDHHC8    | 2.90084  | 2.51731  | 2.86088  | 2.84246  | 2.05396    | 1.64205   |
| ZDHHC9    | 3.04239  | 2.98631  | 4.03927  | 4.00491  | 4.98893    | 4.70901   |
| ZEB1      | 4.78938  | 5.22405  | 6.00353  | 6.10348  | 4.94437    | 4.89274   |
| ZEB1-AS1  | 0.928548 | 0.776601 | 1.81623  | 1.60943  | 0.466152   | 0.0875715 |
| ZEB2      | 6.53465  | 6.2694   | 3.6662   | 3.65024  | 6.00158    | 5.72487   |
| ZER1      | 2.94658  | 2.67672  | 3.39768  | 3.28778  | 3.7512     | 3.45063   |
| ZFAND1    | 3.45194  | 3.47085  | 3.39391  | 3.76615  | 4.21159    | 4.79313   |
| ZFAND2A   | 1.43539  | 1.58704  | 2.56132  | 3.01788  | 1.8711     | 2.2475    |
| ZFAND2B   | 2.31216  | 2.28536  | 2.91977  | 3.05608  | 3.73522    | 3.90062   |
| ZFAND3    | 3.53094  | 3.35094  | 3.79519  | 4.01528  | 4.80932    | 4.40832   |
| ZFAND4    | 0.870842 | 0.840999 | -3.85951 | -4.10635 | 0.362161   | 0.522196  |

|              |            |           |           |           |            |           |
|--------------|------------|-----------|-----------|-----------|------------|-----------|
| ZFAND5       | 5.68564    | 5.68779   | 6.43107   | 6.61177   | 6.21049    | 6.13006   |
| ZFAND6       | 4.86313    | 4.8036    | 4.82835   | 4.9759    | 5.03298    | 5.16976   |
| ZFAS1        | 4.89798    | 4.88643   | 4.45121   | 4.84317   | 5.34144    | 5.95994   |
| ZFAT         | 3.26568    | 3.29351   | 2.67004   | 2.75821   | 3.26394    | 3.23957   |
| ZFC3H1       | 5.87804    | 5.90943   | 5.60449   | 5.50883   | 5.12673    | 4.99545   |
| ZFHX3        | 4.50876    | 4.41051   | 5.15526   | 4.86248   | 4.23076    | 3.91545   |
| ZFHX4        | 4.6279     | 4.60256   | 4.22692   | 3.99183   | 6.60072    | 6.47657   |
| ZFP1         | 3.63072    | 3.58836   | 3.31233   | 3.46103   | 2.54915    | 2.80505   |
| ZFP14        | 3.03902    | 3.0994    | 2.68993   | 2.6157    | 2.05739    | 2.00067   |
| ZFP28        | 2.41728    | 2.55953   | 2.47113   | 2.45724   | 3.03666    | 2.79314   |
| ZFP3         | -0.569597  | -0.27286  | -0.935332 | -0.682344 | 2.80118    | 2.61071   |
| ZFP30        | 3.38758    | 3.38408   | 3.44026   | 3.31809   | 3.1363     | 3.19215   |
| ZFP36        | 0.470938   | -0.122851 | 1.42385   | 1.54942   | 0.924716   | 0.90806   |
| ZFP36L1      | 4.0005     | 3.67158   | 5.38729   | 5.26134   | 4.23224    | 4.03475   |
| ZFP36L2      | 3.70287    | 3.62196   | 1.20884   | 1.18584   | 3.37448    | 3.82467   |
| ZFP37        | 1.95558    | 1.79457   | 2.11571   | 1.94105   | 1.73632    | 2.21217   |
| ZFP41        | 2.07254    | 2.00777   | 2.8953    | 2.94727   | 2.43491    | 1.96037   |
| ZFP62        | 3.61946    | 3.58972   | 4.09841   | 4.18465   | 4.26226    | 4.01439   |
| ZFP64        | 3.14642    | 3.05088   | 2.40145   | 2.64941   | 3.03144    | 2.5317    |
| ZFP69        | 1.00834    | 1.06077   | 1.15638   | 1.49854   | -3.07415   | -4.11926  |
| ZFP69B       | 2.17746    | 2.88145   | 0.770744  | 1.02051   | 0.932205   | 1.03481   |
| ZFP82        | 3.32744    | 3.53292   | 2.11571   | 2.12481   | 0.643551   | 0.443129  |
| ZFP90        | 3.26093    | 3.23933   | 4.3768    | 4.31114   | 4.28073    | 4.53645   |
| ZFP91        | 5.99728    | 6.29764   | 6.01306   | 6.48343   | 6.16247    | 6.37865   |
| ZFPL1        | 2.81179    | 2.44547   | 2.05325   | 2.43603   | 2.31941    | 2.22973   |
| ZFPM2        | 3.45826    | 3.57058   | 3.50122   | 2.92185   | 2.42451    | 1.65087   |
| ZFPM2-AS1    | 3.01001    | 2.80629   | 3.65252   | 3.35061   | 3.39226    | 3.34314   |
| ZFR          | 6.37438    | 6.39765   | 6.06084   | 6.24512   | 6.79633    | 6.73775   |
| ZFX          | 5.13063    | 5.06169   | 5.56706   | 5.56256   | 5.25368    | 4.96393   |
| ZFY          | -6.68174   | -5.45492  | 4.11709   | 4.21233   | -6.64581 ? |           |
| ZFYVE1       | 3.05247    | 2.71956   | 2.59127   | 2.33413   | 3.40847    | 2.70269   |
| ZFYVE16      | 5.60383    | 5.5685    | 5.98482   | 6.11335   | 5.9736     | 6.20316   |
| ZFYVE19      | 3.2903     | 3.29146   | 3.02005   | 3.28261   | 2.9924     | 3.17899   |
| ZFYVE21      | 3.11471    | 2.68182   | 1.93024   | 1.9191    | 2.68843    | 2.2763    |
| ZFYVE26      | 4.71981    | 4.73006   | 3.91845   | 4.07852   | 4.31482    | 4.60616   |
| ZFYVE27      | 3.97687    | 4.08405   | 3.68991   | 4.16613   | 3.82049    | 3.9135    |
| ZFYVE28      | 1.6408     | 1.44408   | 0.904002  | 1.42259   | 0.670686   | 0.633217  |
| ZFYVE9       | 5.05356    | 4.99108   | 4.70002   | 4.85661   | 4.76226    | 4.70202   |
| ZGPAT        | 3.93789    | 3.80228   | 3.36894   | 3.58447   | 3.73403    | 3.33767   |
| ZGRF1        | 4.78422    | 4.90837   | 4.88524   | 5.01464   | 4.05651    | 4.27627   |
| ZHX1         | 3.45314    | 3.46391   | 5.18863   | 5.45939   | 5.54233    | 5.9606    |
| ZHX1-C8orf76 | 0.825818   | 0.708955  | 1.42741   | 1.42255   | 1.29972    | 1.39917   |
| ZHX2         | 3.00655    | 2.77078   | -0.11729  | -0.860651 | 3.24958    | 2.73209   |
| ZHX3         | 5.8479     | 5.60544   | 5.6305    | 5.57591   | 5.01199    | 4.48545   |
| ZIC1         | -1.61119   | -1.55554  | 2.12938   | 1.8912    | 1.40043    | 0.522196  |
| ZIC2         | -5.69162 ? |           | 1.45314   | 1.77994   | 0.0122397  | -0.4586   |
| ZIC4         | -4.11163 ? |           | 1.02599   | 1.12005   | -0.267833  | -1.24695  |
| ZIC5         | ? ?        |           | 0.460428  | 0.786061  | 0.69732    | -0.121607 |
| ZIK1         | 3.13698    | 3.34772   | 2.43497   | 2.60886   | 3.97722    | 3.61522   |
| ZKSCAN1      | 6.2359     | 6.37018   | 6.33239   | 6.38906   | 6.26706    | 6.15707   |
| ZKSCAN2      | 3.11471    | 2.86583   | 3.23644   | 3.05357   | 3.23905    | 2.75682   |
| ZKSCAN3      | 1.34869    | 0.987088  | 2.79877   | 3.01936   | 2.96039    | 2.96974   |

|          |           |           |           |           |            |          |
|----------|-----------|-----------|-----------|-----------|------------|----------|
| ZKSCAN4  | 1.57889   | 1.69788   | 1.8513    | 1.98622   | 2.22462    | 2.40632  |
| ZKSCAN5  | 4.45954   | 4.37635   | 4.74573   | 4.9532    | 4.65765    | 4.7414   |
| ZKSCAN7  | -0.543543 | -0.604659 | 2.10296   | 1.91921   | -0.957246  | -1.52941 |
| ZKSCAN8  | 4.67868   | 4.74232   | 4.81648   | 4.85551   | 5.18792    | 4.99544  |
| ZMAT2    | 5.03502   | 4.97836   | 5.22958   | 5.66744   | 5.39757    | 5.42013  |
| ZMAT3    | 5.15226   | 5.17332   | 4.40237   | 4.7507    | 4.66274    | 4.7981   |
| ZMAT5    | 1.94832   | 1.78414   | 2.01935   | 2.41626   | 1.82099    | 2.21691  |
| ZMIZ1    | 4.59609   | 4.3437    | 4.7959    | 4.57153   | 4.21005    | 4.45944  |
| ZMIZ2    | 3.51037   | 3.25312   | 3.94576   | 3.9586    | 3.55643    | 3.12618  |
| ZMPSTE24 | 5.79151   | 6.1967    | 5.25993   | 5.91352   | 5.80244    | 6.36641  |
| ZMYM1    | 4.00913   | 4.20603   | 4.3498    | 4.6097    | 4.50961    | 4.64422  |
| ZMYM2    | 5.67622   | 5.58053   | 6.40094   | 6.4218    | 6.01409    | 5.78862  |
| ZMYM3    | 4.43085   | 4.35253   | 4.89661   | 4.87985   | 4.91191    | 4.72165  |
| ZMYM4    | 6.04689   | 5.97657   | 5.82717   | 5.95453   | 5.96958    | 6.14455  |
| ZMYM5    | 3.14641   | 3.16469   | 2.72638   | 2.93284   | 2.72772    | 2.60618  |
| ZMYM6    | 3.15899   | 3.32513   | 3.27807   | 3.54755   | 3.52549    | 3.51986  |
| ZMYM6NB  | 1.69608   | 1.90862   | 2.20721   | 2.1643    | 1.9709     | 2.8419   |
| ZMYND11  | 5.3205    | 5.26167   | 4.31432   | 4.52416   | 5.39259    | 5.34312  |
| ZMYND19  | 3.46959   | 3.46642   | 2.98139   | 3.28992   | 3.26302    | 3.37544  |
| ZMYND8   | 6.13272   | 5.78032   | 6.25214   | 5.88625   | 5.30076    | 4.78168  |
| ZNF10    | 2.56302   | 2.70458   | 0.882627  | 0.749225  | 2.26452    | 2.14505  |
| ZNF100   | 3.37433   | 3.4255    | 3.15807   | 2.98448   | 2.44069    | 1.95152  |
| ZNF101   | 3.1417    | 3.1013    | 2.16964   | 2.34651   | 3.13411    | 3.40443  |
| ZNF101P2 | 0.490837  | 0.479758  | -0.375995 | -0.649181 | -0.0752099 | 0.293394 |
| ZNF106   | 6.88244   | 6.97955   | 6.50843   | 6.80797   | 6.51911    | 6.46006  |
| ZNF107   | 3.94747   | 3.78315   | 4.09491   | 3.94645   | 3.71037    | 3.25329  |
| ZNF112   | 3.61492   | 3.66514   | 3.0186    | 3.21085   | 3.40039    | 3.48064  |
| ZNF117   | 1.65386   | 1.51841   | 4.5357    | 4.02886   | 1.79992    | 1.19187  |
| ZNF12    | 4.74594   | 4.70205   | 5.04828   | 5.11276   | 5.03883    | 4.98153  |
| ZNF121   | 6.29666   | 6.23824   | 4.57552   | 4.70975   | 6.55032    | 6.16171  |
| ZNF124   | 3.6716    | 3.56091   | 3.25111   | 3.23769   | 3.50711    | 4.25762  |
| ZNF131   | 4.21305   | 4.45825   | 4.41545   | 4.49015   | 5.08494    | 5.17892  |
| ZNF132   | -0.129081 | -0.790185 | 2.37873   | 2.6225    | 2.6251     | 2.61071  |
| ZNF133   | 4.5213    | 4.51084   | 4.04169   | 4.12599   | 3.36344    | 3.38869  |
| ZNF134   | 3.61267   | 3.81211   | 3.39957   | 3.56183   | 4.35299    | 4.22253  |
| ZNF136   | 2.68894   | 2.61932   | 1.68687   | 1.53507   | 2.19769    | 2.08121  |
| ZNF138   | 2.84589   | 2.82025   | 2.9939    | 2.92185   | 2.684      | 3.05816  |
| ZNF14    | 2.18358   | 2.13709   | 1.70525   | 1.69856   | 1.9359     | 2.02802  |
| ZNF140   | 3.10226   | 3.32907   | 0.92184   | 0.680027  | 2.86929    | 3.09764  |
| ZNF141   | 3.03224   | 3.08983   | -1.42826  | -1.35358  | 2.41117    | 2.58792  |
| ZNF142   | 3.8714    | 3.81465   | 3.63251   | 3.70028   | 4.01513    | 3.70188  |
| ZNF143   | 3.34945   | 3.30212   | 3.49771   | 3.59853   | 3.5721     | 3.82272  |
| ZNF146   | 6.21299   | 6.26071   | 5.30561   | 5.45847   | 6.58261    | 6.70679  |
| ZNF148   | 5.52974   | 5.40635   | 5.52124   | 5.70254   | 5.59469    | 5.57173  |
| ZNF154   | 1.40948   | 1.83639   | 1.63029   | 1.26626   | 1.5829     | 0.752791 |
| ZNF155   | 0.804574  | 1.02048   | 1.85244   | 1.72972   | 2.86505    | 2.77691  |
| ZNF16    | 1.9303    | 2.02099   | 2.10652   | 2.08102   | 2.16943    | 2.43796  |
| ZNF160   | 3.89244   | 3.75994   | 3.96749   | 3.96932   | 4.67172    | 4.35667  |
| ZNF169   | 1.52013   | 1.60865   | 1.30837   | 1.41477   | 1.62513    | 0.863209 |
| ZNF17    | 2.58633   | 2.77317   | 2.53759   | 2.75226   | 3.12923    | 3.19717  |
| ZNF174   | 2.14956   | 2.15923   | 1.96116   | 2.27489   | 2.0332     | 2.0415   |
| ZNF175   | 3.18051   | 3.16469   | 3.26563   | 3.47614   | 3.58643    | 3.6107   |



|            |           |           |           |          |            |           |
|------------|-----------|-----------|-----------|----------|------------|-----------|
| ZNF18      | 1.41317   | 1.57805   | 2.07829   | 2.10497  | 2.02685    | 2.5782    |
| ZNF180     | 3.4494    | 3.57333   | 3.00136   | 3.11518  | 3.48052    | 3.80109   |
| ZNF181     | 2.39193   | 2.54488   | 2.75249   | 2.9413   | 2.8435     | 3.6322    |
| ZNF182     | 3.03224   | 2.85458   | 2.03082   | 2.17196  | 2.05052    | 2.19417   |
| ZNF184     | 3.26526   | 3.41213   | 2.42751   | 2.76462  | 3.08452    | 3.91715   |
| ZNF185     | 1.59558   | 1.20963   | -1.32519  | -1.20162 | -0.729349  | -0.799584 |
| ZNF189     | 3.42892   | 3.36846   | 3.75605   | 3.85262  | 3.2778     | 3.54122   |
| ZNF19      | 0.626645  | 0.523773  | 1.67151   | 1.51793  | 1.27856    | 1.12271   |
| ZNF192P1   | -0.791952 | -0.333394 | 1.25947   | 0.773887 | 0.606556   | 0.50283   |
| ZNF195     | 4.02799   | 3.95712   | 3.80373   | 3.72722  | 3.64575    | 3.5293    |
| ZNF197     | 4.31447   | 4.45854   | 4.28617   | 4.25542  | 4.38817    | 4.18202   |
| ZNF2       | 2.18052   | 2.09942   | 1.88259   | 1.93012  | 2.30837    | 2.18812   |
| ZNF20      | 0.928753  | 1.08415   | 0.793247  | 0.54209  | 0.586894   | 0.565188  |
| ZNF200     | 3.17378   | 3.29455   | 2.89246   | 2.95953  | 2.92466    | 2.81686   |
| ZNF202     | 3.43791   | 3.53856   | 2.8554    | 3.0686   | 3.01212    | 2.74862   |
| ZNF204P    | 1.48086   | 1.50298   | -1.01332  | -1.35358 | -4.65668   | -3.38329  |
| ZNF205     | 0.662588  | 0.3097    | 0.459589  | 0.850591 | 1.21438    | 1.2607    |
| ZNF207     | 7.36701   | 7.41612   | 7.47678   | 7.5772   | 7.57082    | 7.41357   |
| ZNF208     | 3.68345   | 3.6078    | -3.59683  | -4.51838 | -6.64581   | -5.69922  |
| ZNF211     | 2.5536    | 2.52301   | 2.80801   | 2.99708  | 3.30548    | 3.29046   |
| ZNF212     | 2.77766   | 2.73683   | 2.63027   | 2.58467  | 2.75755    | 2.63759   |
| ZNF213     | 1.00142   | 0.785149  | 0.636738  | 0.786061 | 1.1471     | 1.02127   |
| ZNF213-AS1 | 1.47588   | 1.46201   | 1.83887   | 2.01532  | 1.41654    | 1.08885   |
| ZNF215     | 2.93936   | 3.06072   | -6.17309  | -5.10387 | -6.64581 ? |           |
| ZNF217     | 6.07119   | 6.07083   | 6.88544   | 6.78795  | 6.29307    | 5.82882   |
| ZNF219     | 1.66808   | 1.30004   | 0.408907  | 0.272823 | 0.9837     | 0.84754   |
| ZNF22      | 3.97878   | 4.08064   | 3.82178   | 4.03671  | 4.68452    | 5.25757   |
| ZNF221     | 2.63185   | 2.78034   | 2.00632   | 1.88555  | 2.58288    | 1.67702   |
| ZNF222     | 1.65121   | 1.67091   | 1.19801   | 1.32915  | 1.74313    | 1.93874   |
| ZNF223     | 0.923035  | 1.21226   | 0.742619  | 0.524435 | 1.39134    | 0.740392  |
| ZNF224     | 3.85602   | 3.78732   | 4.15941   | 4.07873  | 4.65984    | 4.04656   |
| ZNF225     | 2.63856   | 2.77317   | 2.61415   | 2.56361  | 3.25408    | 2.99373   |
| ZNF226     | 3.79477   | 3.84777   | 3.8249    | 3.63264  | 4.71418    | 4.53526   |
| ZNF227     | 4.14727   | 4.24926   | 3.50164   | 3.61733  | 4.68554    | 4.68562   |
| ZNF229     | 3.96357   | 3.96759   | -0.825729 | -1.02108 | -2.07475   | -3.12051  |
| ZNF23      | 2.60952   | 2.56856   | 3.29326   | 3.49738  | 3.49093    | 3.0848    |
| ZNF230     | 2.54411   | 2.28872   | 1.80519   | 1.76772  | 2.37862    | 2.33769   |
| ZNF232     | 3.25199   | 3.32518   | 2.34846   | 2.53579  | 2.85304    | 3.12599   |
| ZNF233     | 1.10187   | 1.33161   | 0.802367  | 0.414828 | 1.02625    | 0.702755  |
| ZNF234     | 3.66506   | 3.81561   | 3.15856   | 3.19723  | 4.2139     | 3.86883   |
| ZNF235     | 3.25179   | 3.45076   | 3.25694   | 3.15083  | 3.19341    | 2.77222   |
| ZNF236     | 4.5219    | 4.39591   | 4.032     | 3.73979  | 2.85145    | 2.42258   |
| ZNF239     | 1.43538   | 1.29875   | 1.20023   | 0.736735 | 3.20233    | 2.85554   |
| ZNF24      | 6.08736   | 6.24842   | 5.37632   | 5.59855  | 5.49386    | 5.7886    |
| ZNF248     | 3.39104   | 3.34612   | 3.70978   | 3.5724   | 3.47026    | 3.22993   |
| ZNF25      | 2.5536    | 2.77557   | 2.31235   | 2.47239  | 2.48181    | 2.96925   |
| ZNF250     | 1.99094   | 2.08792   | 3.24693   | 3.29632  | 2.31412    | 2.10066   |
| ZNF251     | 2.53455   | 2.65351   | 3.58962   | 3.63095  | 3.64461    | 3.53169   |
| ZNF252P    | 3.8949    | 3.95427   | 4.25902   | 4.40739  | 5.43927    | 5.79293   |
| ZNF253     | 2.77765   | 2.57883   | 1.78229   | 1.64609  | -1.26766   | -1.79933  |
| ZNF254     | 2.77148   | 2.83754   | 3.6506    | 3.44158  | 3.79811    | 3.71881   |
| ZNF256     | 2.30656   | 2.45305   | 1.28413   | 1.28354  | 2.02971    | 1.89323   |

|            |            |           |           |            |            |          |
|------------|------------|-----------|-----------|------------|------------|----------|
| ZNF257     | 2.69968    | 2.85231 ? |           | -4.52056   | -6.64581 ? |          |
| ZNF259P1   | -0.0494525 | 0.123375  | -0.284425 | 0.499588   | 1.26277    | 1.33874  |
| ZNF26      | 4.23976    | 4.45973   | 3.32428   | 3.24211    | 4.04445    | 3.81292  |
| ZNF260     | 4.2033     | 4.30781   | 3.843     | 3.83661    | 3.86023    | 3.73208  |
| ZNF263     | 4.20271    | 4.22655   | 3.97009   | 4.10283    | 4.16651    | 4.10534  |
| ZNF264     | 4.06745    | 3.93967   | 4.2511    | 4.32475    | 5.2027     | 4.72059  |
| ZNF266     | 4.12667    | 3.90346   | 3.74277   | 3.68883    | 3.82652    | 3.31288  |
| ZNF267     | 4.43982    | 4.46641   | 3.85539   | 4.12358    | 3.57811    | 4.04817  |
| ZNF268     | 4.49135    | 4.48405   | 2.40895   | 2.1152     | 4.10124    | 4.18355  |
| ZNF271P    | 3.81563    | 3.72574   | 3.88121   | 3.95052    | 3.56249    | 3.79512  |
| ZNF273     | 2.49076    | 2.43501   | 2.62706   | 2.44193    | 1.91405    | 1.70271  |
| ZNF274     | 2.50795    | 2.3413    | 2.44948   | 2.44193    | 3.89139    | 3.48064  |
| ZNF275     | 2.92663    | 2.88811   | 3.06678   | 3.52961    | 3.45992    | 3.31287  |
| ZNF276     | 3.17057    | 2.93011   | 3.22804   | 3.42399    | 2.96289    | 2.65294  |
| ZNF277     | 3.30534    | 3.28505   | 2.59303   | 3.00275    | 3.09722    | 3.69203  |
| ZNF28      | 4.03378    | 4.13465   | 2.70068   | 2.80029    | 3.38056    | 3.51522  |
| ZNF280B    | ? ?        |           | -0.69145  | -1.30113   | 1.35654    | 0.443129 |
| ZNF280C    | 1.99791    | 2.01291   | 3.08795   | 3.15561    | 3.86619    | 3.88947  |
| ZNF280D    | 4.0936     | 4.25772   | 4.06769   | 3.94645    | 4.57652    | 4.92991  |
| ZNF281     | 5.54762    | 5.45306   | 5.01062   | 5.11093    | 5.55856    | 5.18809  |
| ZNF282     | 3.87078    | 3.73067   | 3.33611   | 3.49294    | 3.83853    | 3.88946  |
| ZNF283     | 3.68462    | 3.96132   | 2.90395   | 2.83662    | 4.04098    | 4.18353  |
| ZNF284     | 2.93019    | 3.06239   | 1.97684   | 2.00671    | 3.61749    | 3.02679  |
| ZNF285     | 1.7716     | 1.69004   | 1.21518   | 0.867359   | 0.613211   | 0.502025 |
| ZNF286A    | 4.99361    | 4.84515   | 4.947     | 4.97001    | 5.12305    | 5.19134  |
| ZNF286B    | 2.00425    | 1.8661    | 2.58813   | 2.5635     | 2.94903    | 2.74334  |
| ZNF287     | 1.51041    | 1.45008   | 2.31634   | 2.29207    | 1.80732    | 2.10709  |
| ZNF292     | 6.13693    | 6.07823   | 6.09463   | 5.92528    | 6.74081    | 6.66151  |
| ZNF3       | 4.73414    | 4.72653   | 4.74604   | 4.7104     | 4.8033     | 4.64817  |
| ZNF30      | 1.76038    | 1.84096   | 1.91979   | 1.92462    | 1.82755    | 1.80111  |
| ZNF300     | 4.31076    | 4.34531   | 3.98764   | 4.02432    | 3.48307    | 3.79512  |
| ZNF302     | 4.11961    | 4.03089   | 4.64349   | 4.59364    | 4.27502    | 4.31534  |
| ZNF304     | 3.44371    | 3.4156    | 3.28418   | 3.52662    | 3.51319    | 3.5641   |
| ZNF316     | 3.37507    | 3.23412   | 3.27796   | 3.32372    | 4.00857    | 3.23287  |
| ZNF317     | 4.07405    | 3.98837   | 3.65883   | 3.86988    | 4.73842    | 4.42127  |
| ZNF318     | 4.52972    | 4.49499   | 4.70976   | 4.74136    | 4.78211    | 4.42128  |
| ZNF319     | 1.02208    | 0.804012  | 2.22554   | 2.8968     | 2.33688    | 2.48312  |
| ZNF32      | 2.63045    | 2.50169   | 2.06329   | 2.18003    | 2.8119     | 3.42822  |
| ZNF320     | 4.24827    | 4.19587   | 3.15409   | 3.21584    | 3.16796    | 2.67541  |
| ZNF322     | 3.8126     | 3.8695    | 4.0036    | 4.05333    | 4.49926    | 4.88138  |
| ZNF324     | 3.18562    | 3.22076   | 2.59152   | 2.8482     | 3.28354    | 3.33701  |
| ZNF324B    | 1.91804    | 1.90786   | 1.72919   | 1.71465    | 2.45876    | 2.50444  |
| ZNF326     | 5.12945    | 5.08114   | 5.21253   | 5.06546    | 4.90668    | 4.2848   |
| ZNF329     | 2.12112    | 1.94657   | 0.292311  | 0.383121 ? |            | ?        |
| ZNF330     | 3.65737    | 3.82024   | 2.59785   | 3.07357    | 3.56731    | 3.67482  |
| ZNF331     | 3.85263    | 3.81675   | 3.44766   | 3.26404    | 1.90577    | 1.18815  |
| ZNF333     | 2.13066    | 1.9925    | 2.04532   | 1.88118    | 3.25855    | 2.75682  |
| ZNF334     | 0.878411   | 0.479758  | 3.35176   | 3.11276 ?  |            | ?        |
| ZNF335     | 4.46958    | 4.33481   | 3.8866    | 3.88269    | 3.6251     | 3.17287  |
| ZNF337     | 4.8745     | 4.86216   | 3.96871   | 3.84823    | 4.10868    | 3.53789  |
| ZNF337-AS1 | 3.43972    | 2.99964   | 3.24912   | 2.83377    | 1.71668    | 1.37737  |
| ZNF33A     | 4.24141    | 4.24926   | 4.081     | 3.86373    | 4.49305    | 4.33835  |

|            |           |           |           |           |            |           |
|------------|-----------|-----------|-----------|-----------|------------|-----------|
| ZNF33B     | 3.64495   | 3.77017   | 3.2236    | 3.04673   | 3.98561    | 3.89412   |
| ZNF34      | 0.870842  | 1.00482   | 0.925065  | 1.06115   | 1.40582    | 1.43288   |
| ZNF341     | 0.847885  | 0.727284  | 0.641241  | 0.49591   | 0.394821   | 0.277616  |
| ZNF343     | 4.16464   | 4.23932   | 4.1213    | 4.26621   | 3.45977    | 3.36743   |
| ZNF345     | 0.510466  | 0.850103  | 1.04535   | 1.01017   | 0.529601   | 0.33778   |
| ZNF346     | 2.69753   | 2.68945   | 3.57636   | 3.74915   | 3.59708    | 3.20018   |
| ZNF347     | 4.30513   | 4.40132   | 3.63169   | 3.69369   | 3.15827    | 3.07137   |
| ZNF35      | 3.84781   | 4.01287   | 2.78803   | 3.05608   | 3.88658    | 4.18202   |
| ZNF350     | 1.70609   | 1.47971   | 1.12031   | 1.10068   | 2.0332     | 1.95152   |
| ZNF354A    | 3.43524   | 3.43562   | 3.15872   | 3.10088   | 1.7443     | 1.68424   |
| ZNF354B    | 2.69771   | 2.75535   | 3.57457   | 3.52943   | 2.38991    | 2.18911   |
| ZNF354C    | 3.64736   | 3.55949   | 2.36424   | 2.52733   | 4.0421     | 3.42626   |
| ZNF358     | 2.28078   | 2.02886   | 2.29153   | 2.29982   | 2.66375    | 2.74844   |
| ZNF362     | 2.1558    | 2.48846   | 2.14741   | 2.27057   | 1.66615    | 1.99375   |
| ZNF365     | 2.1083    | 2.58156   | 1.20023   | 2.24874   | 3.72554    | 4.18202   |
| ZNF367     | 3.94026   | 3.57196   | 2.88257   | 2.98129   | 4.11776    | 3.79114   |
| ZNF37A     | 4.81199   | 4.88033   | 4.26389   | 4.31848   | 4.5832     | 4.08118   |
| ZNF37BP    | 4.99066   | 4.95078   | 4.39359   | 4.33825   | 3.74633    | 3.00754   |
| ZNF382     | 2.34381   | 2.19558   | 0.650296  | 0.139221  | 2.37333    | 1.66836   |
| ZNF383     | 2.03238   | 2.01567   | 1.38893   | 1.45216   | 2.27296    | 2.05264   |
| ZNF384     | 4.3296    | 4.04057   | 3.72223   | 3.91983   | 3.93349    | 3.35688   |
| ZNF385A    | 2.3316    | 2.18103   | -0.539469 | -0.649181 | -1.61549   | -1.31405  |
| ZNF385D    | -1.08408  | -1.41808  | 2.01126   | 2.27921   | 1.85542    | 1.92993   |
| ZNF394     | 3.79355   | 3.91211   | 3.91676   | 4.09294   | 3.85838    | 3.84402   |
| ZNF395     | 4.11338   | 4.15243   | 4.69444   | 4.8803    | 4.34137    | 3.56712   |
| ZNF397     | 3.77143   | 3.75583   | 3.68651   | 3.65855   | 2.99853    | 2.59569   |
| ZNF398     | 4.31981   | 4.16285   | 3.95347   | 4.05607   | 4.15428    | 3.89876   |
| ZNF404     | -0.149034 | -0.195908 | -0.193947 | -0.380859 | 1.70706    | 1.50237   |
| ZNF407     | 5.08428   | 4.97906   | 4.49507   | 4.23547   | 3.67619    | 3.36475   |
| ZNF408     | 1.88215   | 1.78036   | 1.39395   | 2.0711    | 2.1112     | 2.11348   |
| ZNF41      | 3.20329   | 3.58427   | 2.11571   | 2.21762   | 2.4767     | 2.94792   |
| ZNF410     | 4.62142   | 4.51424   | 3.59967   | 3.91793   | 4.54291    | 4.73989   |
| ZNF415     | 2.68679   | 2.52585   | 0.770744  | 0.619178  | 0.723471   | 0.483199  |
| ZNF416     | 1.78879   | 1.8681    | 1.25925   | 1.49854   | 2.43246    | 2.32121   |
| ZNF417     | 3.7625    | 3.8148    | 3.55225   | 3.74659   | 3.93988    | 3.46301   |
| ZNF418     | 2.28108   | 2.27864   | -0.568612 | -0.979274 | 1.93217    | 1.22407   |
| ZNF419     | 3.12444   | 3.20642   | 3.05234   | 3.19597   | 3.75372    | 3.46981   |
| ZNF420     | 2.58783   | 2.83507   | 1.53076   | 1.43037   | 2.63332    | 3.06782   |
| ZNF425     | -1.41331  | -1.00314  | 0.782333  | 1.04098   | 0.0677351  | 0.293394  |
| ZNF426     | 3.74074   | 3.71956   | 3.40893   | 3.63769   | 4.26746    | 4.0263    |
| ZNF428     | 1.91381   | 1.81417   | 0.894573  | 1.21399   | 2.44544    | 2.61656   |
| ZNF429     | -0.323873 | -0.604659 | 1.38638   | 1.42259   | -3.85089   | -4.70296  |
| ZNF43      | 4.2703    | 4.31392   | 3.95602   | 3.95371   | 1.24663    | 1.12623   |
| ZNF430     | 2.76241   | 2.86312   | 2.9938    | 2.97599   | 2.84749    | 2.49782   |
| ZNF431     | 4.07676   | 4.06977   | 3.89862   | 3.80305   | 4.00855    | 3.19519   |
| ZNF432     | 2.767     | 2.86592   | 2.43744   | 2.63646   | 3.39892    | 3.48983   |
| ZNF433     | 0.969734  | 0.929518  | 1.06197   | 0.432126  | -0.316268  | -0.584023 |
| ZNF436     | 3.87929   | 3.84548   | 3.87717   | 3.94508   | 6.64196    | 6.35559   |
| ZNF436-AS1 | 2.17438   | 2.17017   | 2.41268   | 2.47615   | 3.12923    | 3.15127   |
| ZNF438     | 1.51527   | 1.36374   | 1.7707    | 2.00494   | 1.93963    | 2.09421   |
| ZNF439     | 3.00476   | 2.68409   | 1.98395   | 1.92597   | -0.0720838 | -2.12114  |
| ZNF44      | 2.1854    | 2.16085   | 1.61093   | 1.79809   | 0.928829   | 0.247587  |

|            |           |           |           |           |           |            |
|------------|-----------|-----------|-----------|-----------|-----------|------------|
| ZNF440     | 3.16826   | 2.94942   | 2.49419   | 2.45065   | 2.85352   | 2.53756    |
| ZNF441     | 2.22278   | 2.36689   | 2.59784   | 2.6856    | 2.23149   | 2.28199    |
| ZNF443     | 1.83366   | 1.85036   | 1.88933   | 1.90378   | 0.430478  | 0.507181   |
| ZNF444     | 2.25514   | 2.04497   | 2.71131   | 2.44577   | 2.3397    | 1.74453    |
| ZNF445     | 5.13893   | 5.22057   | 4.99575   | 5.01206   | 4.95715   | 4.57751    |
| ZNF446     | 2.05756   | 2.05767   | 1.94821   | 2.05223   | 2.18965   | 2.33905    |
| ZNF449     | 2.64966   | 2.77078   | 3.23011   | 3.2176    | 3.60413   | 3.34857    |
| ZNF45      | 4.29737   | 4.33723   | 3.42381   | 3.51504   | 4.63488   | 4.48309    |
| ZNF451     | 6.19993   | 6.13975   | 5.86188   | 5.99832   | 6.57385   | 6.45394    |
| ZNF460     | 4.94631   | 5.15794   | 4.59352   | 5.01892   | 5.55886   | 5.75376    |
| ZNF461     | 1.38311   | 1.07637   | 0.759062  | 0.505972  | 1.52955   | 1.55071    |
| ZNF462     | 5.65141   | 5.73704   | 4.57872   | 4.52597   | 5.90213   | 5.28481    |
| ZNF468     | 3.55997   | 3.34166   | 2.31951   | 2.20771   | 3.04148   | 2.80093    |
| ZNF469     | 2.85359   | 2.50006   | 2.89597   | 2.39103   | 2.71473   | 1.56945    |
| ZNF470     | -0.489437 | 0.107125  | 1.91453   | 1.68562   | 3.9105    | 3.2358     |
| ZNF471     | 1.85937   | 1.68184   | 2.46035   | 2.03585   | 0.384182  | -0.4586    |
| ZNF473     | 4.07806   | 3.96747   | 3.69266   | 3.84519   | 3.90552   | 3.67697    |
| ZNF48      | 1.98393   | 1.8546    | 2.09262   | 2.36692   | 2.24057   | 2.39133    |
| ZNF480     | 3.43535   | 3.47674   | 3.25527   | 3.29844   | 3.71255   | 3.87448    |
| ZNF483     | 2.64522   | 2.36054   | 2.8933    | 2.85408   | 3.01389   | 2.63315    |
| ZNF484     | 3.04408   | 3.03501   | 3.03322   | 3.03073   | 2.99075   | 3.47071    |
| ZNF485     | 1.83233   | 1.7171    | 0.324373  | 0.672606  | 2.00505   | 2.2002     |
| ZNF486     | 2.76649   | 2.71707   | 2.03567   | 2.23992   | -4.33548  | -4.11926   |
| ZNF487     | 0.356302  | 0.137189  | 0.759062  | 1.02051   | -0.374735 | -0.0918635 |
| ZNF488     | -0.791952 | -0.485378 | 1.89865   | 2.21762 ? |           | ?          |
| ZNF490     | 1.50294   | 1.76345   | 1.34812   | 1.60099   | 1.89926   | 1.63729    |
| ZNF493     | 2.72286   | 2.71613   | 3.06746   | 2.78296   | 1.2101    | 0.90806    |
| ZNF496     | 4.70232   | 4.79099   | 4.34784   | 4.53954   | 4.95392   | 4.97188    |
| ZNF497     | 0.0936683 | 0.329181  | 0.621918  | 0.943629  | -0.803675 | -0.732088  |
| ZNF500     | 2.41      | 2.36704   | 2.52609   | 2.8287    | 2.17347   | 1.42757    |
| ZNF501     | 1.38311   | 1.55956   | -1.32519  | -1.06415  | 0.270529  | 0.126299   |
| ZNF503     | -0.816197 | -0.485378 | 0.809135  | 1.14767   | 1.48025   | 1.76277    |
| ZNF506     | 3.19892   | 3.1601    | 2.07568   | 1.84955   | 2.44136   | 1.5228     |
| ZNF507     | 4.85213   | 4.79513   | 5.12992   | 5.0288    | 4.91522   | 4.64973    |
| ZNF510     | 3.92846   | 3.93375   | 3.2532    | 3.38703   | 3.71474   | 4.07136    |
| ZNF511     | 2.83574   | 2.82116   | 2.30778   | 2.58511   | 3.72954   | 4.32385    |
| ZNF512     | 4.05259   | 4.21351   | 4.31473   | 4.41368   | 4.41273   | 4.32408    |
| ZNF512B    | 4.99414   | 4.68111   | 4.92812   | 4.86975   | 5.45424   | 4.96762    |
| ZNF513     | 2.63577   | 2.38745   | 2.25948   | 2.4498    | 3.41255   | 3.19925    |
| ZNF514     | 3.95107   | 3.83865   | 3.59126   | 3.24211   | 4.02531   | 3.56474    |
| ZNF516     | 4.09776   | 4.09557   | 4.14739   | 3.96933   | 2.78056   | 2.54123    |
| ZNF517     | 1.37242   | 1.3381    | 1.34008   | 1.32585   | 0.969108  | 0.863209   |
| ZNF518A    | 3.08393   | 2.77079   | 2.65569   | 2.41475   | 4.48815   | 4.28905    |
| ZNF518B    | -6.68418  | -6.45019  | -6.17309  | -6.09892  | 4.43771   | 4.23433    |
| ZNF519     | 3.1927    | 3.36027   | 4.17196   | 3.95322   | 3.39208   | 2.99225    |
| ZNF521     | 5.16197   | 4.86806   | 1.92503   | 2.08102 ? |           | -4.70296   |
| ZNF524     | -0.676496 | -1.41808  | -0.482896 | -0.250687 | 1.05886   | 1.44307    |
| ZNF525     | 3.04251   | 3.05709   | 2.29397   | 2.4657    | 2.5152    | 2.4755     |
| ZNF526     | 2.86888   | 2.87701   | 1.94578   | 2.39103   | 2.87497   | 2.6899     |
| ZNF527     | 1.8401    | 1.72701   | 1.27595   | 1.39901   | 2.06081   | 1.71958    |
| ZNF528     | 3.81169   | 3.71082   | 2.41268   | 2.19953   | 2.01567   | 1.28202    |
| ZNF528-AS1 | 1.399     | 1.3764    | 0.82777   | 0.100749  | -1.13645  | -3.38329   |

|         |            |           |           |           |           |           |
|---------|------------|-----------|-----------|-----------|-----------|-----------|
| ZNF529  | 3.31711    | 3.51005   | 2.43463   | 2.19953   | 3.90184   | 3.41483   |
| ZNF530  | 2.70394    | 2.85231   | 2.38635   | 2.4799    | 3.19611   | 3.10064   |
| ZNF532  | 6.10651    | 5.73731   | 5.48135   | 5.22194   | 3.77315   | 3.13257   |
| ZNF536  | -5.69162 ? | ?         |           | -6.09892  | 0.585578  | 1.40996   |
| ZNF542P | 3.08032    | 3.10564   | -0.861345 | -0.767904 | 0.724676  | 0.0133836 |
| ZNF543  | 2.74714    | 2.76463   | 2.55607   | 2.8612    | 3.76194   | 3.37782   |
| ZNF544  | 4.31611    | 4.32293   | 3.93056   | 4.07069   | 5.306     | 5.16128   |
| ZNF546  | 2.51282    | 2.58156   | 2.38255   | 2.27921   | 3.02444   | 2.74038   |
| ZNF547  | 1.75791    | 1.70246   | 1.35721   | 1.42849   | 2.01726   | 1.82221   |
| ZNF548  | 3.26015    | 3.31431   | 3.30445   | 3.51996   | 3.71564   | 3.49718   |
| ZNF549  | 2.97462    | 3.08018   | 2.66989   | 2.61155   | 3.56373   | 3.40997   |
| ZNF550  | 3.27717    | 3.54138   | 3.25625   | 3.46901   | 4.05796   | 3.60586   |
| ZNF551  | 3.72259    | 3.86683   | 2.81366   | 2.89661   | 3.98082   | 3.77104   |
| ZNF552  | 2.23002    | 2.35563   | 2.65531   | 2.64887   | 2.70765   | 2.65292   |
| ZNF554  | 0.0425183  | -0.79     | 0.488988  | 0.445854  | 0.258664  | 0.0483059 |
| ZNF555  | 2.72826    | 2.53152   | 2.28288   | 2.23776   | 2.72241   | 2.74862   |
| ZNF557  | 3.08556    | 2.99249   | 2.541     | 2.71773   | 3.88658   | 3.75885   |
| ZNF558  | 3.35852    | 3.07939   | 3.45732   | 3.27348   | 4.06229   | 3.62644   |
| ZNF559  | 2.92296    | 2.65819   | 2.76485   | 2.67233   | 3.10772   | 2.70248   |
| ZNF561  | 3.8583     | 3.8342    | 3.17773   | 3.2791    | 4.29944   | 4.37336   |
| ZNF562  | 5.18108    | 5.24311   | 4.11985   | 4.23038   | 5.49111   | 5.4002    |
| ZNF564  | 2.39265    | 2.3694    | 1.68036   | 1.60327   | 1.85088   | 2.41366   |
| ZNF565  | -0.0847132 | 0.0889557 | 0.564085  | 0.637861  | 0.931585  | 0.346021  |
| ZNF566  | 3.09007    | 3.09598   | 2.30719   | 2.65385   | 2.64134   | 2.47817   |
| ZNF567  | 2.73555    | 2.72204   | 1.91453   | 1.8512    | 2.3841    | 2.22994   |
| ZNF568  | 2.89898    | 2.98218   | 1.37111   | 1.36695   | 2.09793   | 1.96574   |
| ZNF569  | 2.51038    | 2.58252   | 1.46757   | 1.51326   | 2.31412   | 2.65962   |
| ZNF57   | 1.38827    | 1.46066   | 1.01989   | 1.21565   | 1.36312   | 1.55939   |
| ZNF570  | 2.77868    | 2.78187   | 1.93544   | 2.01532   | 2.88659   | 2.83245   |
| ZNF571  | 1.36731    | 1.49719   | 0.208904  | -0.52367  | 1.05399   | 1.15132   |
| ZNF573  | 2.03755    | 1.92123   | 0.598108  | 0.773887  | 1.92701   | 2.12484   |
| ZNF574  | 2.35443    | 2.62381   | 2.40346   | 2.7489    | 2.43785   | 2.61415   |
| ZNF576  | 2.28874    | 2.24267   | 2.09369   | 2.53828   | 2.72647   | 3.24981   |
| ZNF577  | 2.33259    | 2.20634   | 1.25179   | 1.0909    | 2.50712   | 1.51249   |
| ZNF579  | 0.460879   | 0.0918691 | 0.544485  | 0.445854  | 0.749157  | 1.12623   |
| ZNF580  | 1.62935    | 1.56763   | 2.04698   | 2.08638   | 2.91389   | 2.59414   |
| ZNF581  | 2.7939     | 2.71094   | 1.91797   | 2.19457   | 2.97398   | 3.11552   |
| ZNF583  | 1.51528    | 1.38268   | -0.973801 | -1.02108  | 0.954457  | 0.832509  |
| ZNF584  | 2.98567    | 2.90348   | 2.61415   | 2.85408   | 3.09958   | 3.06148   |
| ZNF585A | 2.59819    | 2.56382   | 1.80987   | 1.5745    | 2.38094   | 2.51867   |
| ZNF585B | 3.54452    | 3.44289   | 0.46802   | 0.57416   | 3.39438   | 2.96623   |
| ZNF586  | 3.02575    | 3.05279   | 3.06446   | 3.2161    | 3.58307   | 3.50196   |
| ZNF587  | 4.61422    | 4.62688   | 5.03233   | 5.14796   | 5.47744   | 4.97611   |
| ZNF587B | 3.95564    | 4.04993   | 3.73087   | 3.97984   | 4.67111   | 4.59097   |
| ZNF589  | 4.58525    | 4.85457   | 2.96575   | 2.92284   | 3.3717    | 3.04342   |
| ZNF592  | 4.45984    | 4.36548   | 4.71063   | 4.65877   | 5.32208   | 4.91689   |
| ZNF593  | 2.65617    | 2.27498   | 1.15539   | 1.6772    | 2.63952   | 3.50687   |
| ZNF594  | 3.51402    | 3.61397   | 3.85677   | 3.60884   | 3.83454   | 3.16673   |
| ZNF595  | 3.56301    | 3.65089   | 2.16079   | 2.03585   | 3.08452   | 3.14504   |
| ZNF596  | -0.815382  | -0.705156 | 0.683723  | 0.613192  | -0.685081 | 0.229711  |
| ZNF597  | 2.01175    | 1.96344   | 1.662     | 1.95189   | 2.53937   | 2.61523   |
| ZNF598  | 3.60721    | 3.45282   | 3.24186   | 3.44289   | 3.98282   | 3.95407   |

|              |           |           |           |           |          |          |
|--------------|-----------|-----------|-----------|-----------|----------|----------|
| ZNF599       | 1.23761   | 1.35738   | 1.81651   | 1.8512    | 1.66165  | 1.8479   |
| ZNF600       | 2.03579   | 2.20538   | 1.48938   | 1.69726   | 1.58427  | 1.74374  |
| ZNF605       | 3.99876   | 4.14355   | 1.8609    | 1.80406   | 2.74058  | 2.54105  |
| ZNF606       | 2.50411   | 2.49672   | 2.4171    | 2.32582   | 1.7584   | 1.30456  |
| ZNF607       | 2.62447   | 2.63709   | 1.89244   | 1.87327   | 1.84186  | 1.55071  |
| ZNF608       | 4.50731   | 4.22453   | 6.12137   | 5.76498   | 5.19687  | 4.61069  |
| ZNF609       | 5.64686   | 5.43311   | 5.91351   | 5.92561   | 5.94861  | 5.24602  |
| ZNF611       | 2.71299   | 2.76887   | 2.64567   | 2.82131   | 2.75721  | 2.70713  |
| ZNF613       | 1.74389   | 1.8272    | 1.28413   | 1.39901   | 1.85935  | 1.97981  |
| ZNF614       | 3.5886    | 3.71448   | 2.74399   | 2.80935   | 3.53568  | 3.69841  |
| ZNF615       | 2.61608   | 2.63256   | 1.95093   | 1.97335   | 2.43774  | 2.38606  |
| ZNF616       | 2.82448   | 2.90129   | 2.24276   | 2.19498   | 2.31411  | 2.34858  |
| ZNF618       | 3.3562    | 3.11459   | 4.30431   | 3.97863   | 2.62741  | 1.94436  |
| ZNF619       | 1.21983   | 1.48556   | 1.81651   | 2.22211   | 1.65261  | 1.80902  |
| ZNF620       | 0.377835  | 0.395227  | 0.0833836 | -0.086319 | 3.10788  | 2.95863  |
| ZNF621       | 4.31563   | 4.26677   | 4.08559   | 4.31638   | 4.8885   | 4.5221   |
| ZNF622       | 3.8555    | 3.85908   | 3.04289   | 3.49665   | 3.8544   | 4.17286  |
| ZNF623       | 4.37103   | 4.43727   | 4.60029   | 4.80779   | 4.81896  | 4.73416  |
| ZNF624       | 1.75216   | 1.33809   | 2.73237   | 2.56007   | 2.15669  | 1.95865  |
| ZNF625       | 1.83627   | 1.75993   | 1.1862    | 1.46148   | 1.94211  | 1.31846  |
| ZNF625-ZNF20 | 0.785935  | 0.257373  | 0.53048   | 1.2691    | 1.45147  | 1.72953  |
| ZNF626       | 1.38111   | 1.11463   | 0.558032  | 0.837653  | -5.07051 | -3.12051 |
| ZNF627       | 2.76036   | 2.74661   | 2.71736   | 2.75227   | 2.82552  | 3.12619  |
| ZNF629       | 4.05078   | 3.81444   | 4.65567   | 4.75613   | 3.59708  | 3.47816  |
| ZNF638       | 7.19796   | 7.10012   | 6.69986   | 6.67049   | 7.02288  | 7.13051  |
| ZNF638-IT1   | 2.85167   | 2.76838   | 2.9939    | 2.66267   | 2.46382  | 1.95865  |
| ZNF639       | 4.08146   | 4.05875   | 4.23537   | 4.57942   | 4.93355  | 5.18658  |
| ZNF641       | 2.18969   | 2.12963   | 1.41643   | 1.36695   | 1.92843  | 2.1262   |
| ZNF644       | 6.38573   | 6.46529   | 5.81541   | 5.8366    | 6.45829  | 6.8246   |
| ZNF646       | 3.75229   | 3.7618    | 3.98743   | 4.10152   | 3.89908  | 3.63922  |
| ZNF649       | 2.8397    | 2.96016   | 1.86761   | 2.10781   | 2.50583  | 2.41699  |
| ZNF652       | 5.12188   | 4.93376   | 5.02226   | 5.02943   | 4.84102  | 4.59363  |
| ZNF653       | -0.569597 | -0.604659 | -0.300715 | -0.823182 | 1.1211   | 0.893261 |
| ZNF654       | 4.02458   | 4.01996   | 4.4236    | 4.49757   | 4.17731  | 4.11026  |
| ZNF655       | 6.26668   | 6.39305   | 6.61043   | 6.75259   | 6.67268  | 6.74132  |
| ZNF658       | 3.03677   | 2.91771   | 2.53326   | 2.41217   | 2.31617  | 2.74912  |
| ZNF658B      | 1.11046   | 0.872246  | 1.40347   | 1.2977    | 2.01667  | 2.55952  |
| ZNF66        | 1.13683   | 0.635262  | 0.801349  | 0.445854  | -4.33548 | -3.70484 |
| ZNF660       | 1.73006   | 1.32248   | 2.51327   | 2.33785   | -1.95932 | -1.53638 |
| ZNF664       | 6.22214   | 6.20027   | 5.10185   | 5.30687   | 5.7155   | 5.63408  |
| ZNF665       | 0.832372  | 0.868134  | 0.355738  | 0.350701  | -2.26731 | -1.79933 |
| ZNF667       | 3.22573   | 3.36688   | -0.117291 | -0.154483 | 1.81139  | 1.1007   |
| ZNF667-AS1   | 1.99426   | 1.91208   | 2.76442   | 2.82745   | 1.13291  | 1.25912  |
| ZNF668       | 1.53033   | 1.36737   | 1.26776   | 1.26434   | 1.61261  | 1.94835  |
| ZNF669       | 2.50061   | 2.47968   | 1.60441   | 1.9191    | 2.19146  | 2.52212  |
| ZNF670       | 2.47659   | 2.35437   | 1.42847   | 1.62532   | 1.2101   | 1.493    |
| ZNF671       | 1.43538   | 1.50298   | 1.53761   | 1.6394    | 2.66837  | 2.34858  |
| ZNF672       | 3.40682   | 3.06072   | 2.49597   | 2.78903   | 3.21467  | 3.13878  |
| ZNF674       | 1.75572   | 1.95954   | 2.5312    | 2.78993   | 1.85456  | 1.84477  |
| ZNF674-AS1   | 1.48583   | 1.31856   | 1.8609    | 2.15329   | 0.894341 | 0.33778  |
| ZNF675       | 2.88964   | 2.82025   | 3.01861   | 3.16497   | 3.02619  | 3.43795  |
| ZNF677       | 3.31634   | 3.13272   | -4.59508  | -6.09892  | -4.33548 | -5.69922 |

|         |          |           |          |            |            |           |
|---------|----------|-----------|----------|------------|------------|-----------|
| ZNF678  | 3.89057  | 3.87812   | 3.1111   | 2.894      | 3.43772    | 3.63092   |
| ZNF680  | 4.36161  | 4.49497   | 4.06533  | 3.88977    | 3.53691    | 3.47319   |
| ZNF681  | 1.61548  | 1.36507   | 1.92503  | 1.95729    | 0.437814   | 0.293394  |
| ZNF682  | 1.867    | 1.70209   | 1.15638  | 0.619178   | -2.95876   | -3.38329  |
| ZNF684  | 1.66289  | 1.78985   | 0.986462 | 1.14862    | 1.33409    | 1.83247   |
| ZNF687  | 3.90775  | 3.67681   | 3.83854  | 3.91729    | 4.1516     | 3.94918   |
| ZNF688  | 0.434551 | 0.46244   | 0.693436 | 0.96902    | -0.852709  | 0.293394  |
| ZNF689  | 2.53455  | 2.34774   | 2.60439  | 2.70496    | 2.26748    | 2.38606   |
| ZNF69   | 1.70609  | 1.3764    | 1.97132  | 1.69856    | -0.777433  | -1.53638  |
| ZNF691  | 2.26093  | 2.25827   | 2.72037  | 2.81896    | 1.99434    | 1.94436   |
| ZNF692  | 3.62172  | 3.52584   | 3.16963  | 3.26838    | 4.02092    | 3.41741   |
| ZNF695  | 1.97233  | 1.64012   | 0.877603 | 0.606717   | -5.07051   | -2.70579  |
| ZNF696  | 1.17749  | 1.26512   | 0.636738 | 0.711424   | 1.87887    | 1.70271   |
| ZNF697  | 5.77563  | 5.83807   | 3.5478   | 4.0256     | 5.36966    | 5.37143   |
| ZNF699  | 1.88101  | 1.54842   | 1.42378  | 1.52691    | 0.868813   | 0.650921  |
| ZNF7    | 4.08763  | 4.11541   | 4.20538  | 4.26176    | 4.07294    | 3.99905   |
| ZNF70   | 3.43149  | 3.30699   | 3.42381  | 3.63433    | 2.60179    | 1.95152   |
| ZNF700  | 3.50057  | 3.31617   | 3.38444  | 3.26681    | 3.57368    | 3.67421   |
| ZNF701  | 2.60891  | 2.50187   | 1.8459   | 1.99242    | 2.00849    | 2.24298   |
| ZNF702P | 3.7848   | 3.83719   | 2.02402  | 2.46483    | -5.65305   | -4.70296  |
| ZNF703  | -2.45038 | -2.00285  | 1.36341  | 1.24877    | 0.172692   | 0.33778   |
| ZNF704  | 4.01601  | 4.36687   | -4.18092 | -3.52222   | -1.45047   | -2.12114  |
| ZNF706  | 4.32798  | 4.33333   | 4.26029  | 4.11118    | 3.99835    | 3.88935   |
| ZNF707  | 1.40948  | 1.40138   | 1.61093  | 1.86274    | 1.71041    | 1.74453   |
| ZNF708  | 2.80732  | 2.83408   | 2.59565  | 2.34651    | 2.82553    | 2.83633   |
| ZNF709  | 1.68256  | 1.71843   | 1.50563  | 1.48367    | 0.594568   | 0.094182  |
| ZNF71   | 2.11792  | 1.89913   | 2.23435  | 2.29633    | 2.64804    | 2.32672   |
| ZNF710  | 2.04799  | 1.7886    | 2.81159  | 2.83453    | 2.19091    | 1.78697   |
| ZNF713  | 0.150573 | 0.0961944 | 0.186754 | -0.0382537 | 2.03003    | 1.27575   |
| ZNF714  | 3.94747  | 4.0135    | 4.18024  | 4.29737    | 3.21774    | 2.82467   |
| ZNF717  | 3.28676  | 3.14078   | 3.50472  | 3.27055    | -6.64581 ? |           |
| ZNF718  | 2.75419  | 2.83637   | -2.5977  | -2.20128   | 2.12434    | 1.9868    |
| ZNF720  | 2.26349  | 2.12963   | 3.18457  | 3.02538    | 1.59706    | 1.3157    |
| ZNF721  | 4.54311  | 4.62124   | 4.32261  | 4.12406    | 5.13006    | 5.05539   |
| ZNF724P | 3.50426  | 3.46584   | 2.58467  | 2.8337     | 3.20384    | 3.25907   |
| ZNF726  | 1.93998  | 1.78083   | 1.57932  | 1.3406     | 1.37372    | 0.606982  |
| ZNF730  | 1.03481  | 0.904473  | 1.28096  | 1.03517    | -5.07051   | -3.70484  |
| ZNF736  | 4.87454  | 4.92559   | 4.37871  | 4.33825    | 2.76173    | 2.39659   |
| ZNF737  | 1.3985   | 1.20963   | 1.88409  | 1.81997    | -13.2876   | -4.11926  |
| ZNF738  | 2.10184  | 1.97257   | 2.12938  | 1.82784    | 1.00508    | 0.293394  |
| ZNF74   | 3.25657  | 3.13707   | 3.12026  | 2.81599    | 2.58525    | 2.26485   |
| ZNF740  | 4.9298   | 4.81907   | 4.05368  | 4.13905    | 4.37723    | 4.06147   |
| ZNF746  | 3.37878  | 3.27036   | 4.0043   | 3.89998    | 3.27693    | 3.20147   |
| ZNF747  | 2.50085  | 2.27565   | 1.95768  | 2.1        | -1.39675   | -2.23309  |
| ZNF749  | 2.56947  | 2.56496   | 2.23001  | 2.26877    | 2.99608    | 2.74038   |
| ZNF750  | 0.62293  | 0.756391  | 0.191626 | -0.086319  | -0.302594  | -0.899103 |
| ZNF75A  | 3.78476  | 3.67246   | 3.32513  | 3.26922    | 3.87091    | 3.46014   |
| ZNF75D  | 2.88401  | 2.8881    | 3.66822  | 3.74676    | 3.5496     | 3.4582    |
| ZNF76   | 3.19877  | 3.02901   | 3.35758  | 3.44       | 3.732      | 3.74037   |
| ZNF761  | 3.16287  | 3.10193   | 2.83097  | 2.99116    | 2.80458    | 2.51104   |
| ZNF764  | 1.42508  | 1.3381    | 1.46757  | 1.4458     | 0.652647   | 0.483199  |
| ZNF765  | 3.24731  | 3.31657   | 3.13831  | 3.30105    | 3.25214    | 3.40149   |

|                |          |          |           |           |            |          |
|----------------|----------|----------|-----------|-----------|------------|----------|
| ZNF766         | 3.24637  | 3.15187  | 2.6109    | 2.6157    | 3.18518    | 3.05484  |
| ZNF767P        | 3.1948   | 3.12379  | 3.84385   | 3.91039   | 3.10056    | 2.43577  |
| ZNF768         | 3.11064  | 3.32586  | 2.78722   | 3.12082   | 3.27619    | 3.68987  |
| ZNF77          | 1.7928   | 1.87257  | 1.24279   | 1.39106   | 1.90577    | 1.78517  |
| ZNF770         | 5.49536  | 5.62095  | 4.85607   | 5.02494   | 5.59027    | 5.3363   |
| ZNF771         | 1.27904  | 1.07937  | 1.39      | 1.47986   | 1.23803    | 1.22235  |
| ZNF772         | 3.26237  | 3.50149  | 2.8191    | 3.01439   | 4.44493    | 4.5987   |
| ZNF773         | 1.76816  | 1.8619   | 2.14321   | 2.25492   | 3.24085    | 2.73774  |
| ZNF774         | 1.28965  | 1.26512  | 1.30837   | 1.40691   | 1.80324    | 1.44308  |
| ZNF775         | 1.14646  | 1.27191  | 3.0453    | 3.42451   | 1.2406     | 1.70271  |
| ZNF776         | 3.97596  | 3.9454   | 3.85813   | 3.87799   | 4.69284    | 4.71219  |
| ZNF777         | 2.09536  | 2.04497  | 2.15189   | 1.81601   | 2.09125    | 1.87827  |
| ZNF778         | 4.2108   | 4.18371  | 3.43486   | 3.49108   | 3.81643    | 3.24749  |
| ZNF780A        | 4.07359  | 4.03238  | 3.95986   | 3.90351   | 4.43743    | 4.53289  |
| ZNF780B        | 4.73218  | 4.73681  | 4.60507   | 4.51064   | 5.41557    | 5.26031  |
| ZNF782         | 2.28393  | 2.38891  | 2.59785   | 2.43422   | 2.15988    | 1.80902  |
| ZNF783         | 3.73819  | 3.67683  | 2.84277   | 2.85661   | 2.95357    | 2.61239  |
| ZNF785         | 2.66485  | 2.53049  | 2.83776   | 2.93046   | -2.3604    | -2.28791 |
| ZNF786         | 2.5055   | 2.57334  | 2.02595   | 1.87419   | 2.15349    | 1.95865  |
| ZNF787         | 1.96628  | 1.95924  | 1.8772    | 2.11036   | 2.72556    | 3.01097  |
| ZNF788         | 3.97981  | 3.95491  | 2.9066    | 2.9149    | 1.79661    | 1.61494  |
| ZNF789         | 3.47364  | 3.53302  | 3.75205   | 3.89579   | 3.35086    | 2.75682  |
| ZNF79          | 2.37775  | 2.41061  | 1.71738   | 2.01014   | 1.5443     | 1.2122   |
| ZNF790         | 2.32884  | 2.35095  | 1.40898   | 1.28354   | 2.64804    | 2.70269  |
| ZNF791         | 4.34188  | 4.29205  | 3.85951   | 4.04472   | 4.78625    | 4.53525  |
| ZNF792         | 2.02886  | 2.08021  | 3.43853   | 3.60713   | 2.01567    | 1.82469  |
| ZNF799         | 1.84801  | 1.6895   | 1.10483   | 0.899121  | 0.525748   | 0.858315 |
| ZNF8           | 4.06599  | 3.84126  | 3.61346   | 3.47111   | 4.25258    | 3.52094  |
| ZNF800         | 5.26598  | 5.17919  | 4.52469   | 4.41472   | 4.71309    | 4.70902  |
| ZNF804A        | 0.743937 | 0.822624 | 1.09265   | 1.27492   | 2.2254     | 2.85935  |
| ZNF805         | 2.60109  | 2.37014  | 2.1677    | 2.28578   | 3.28193    | 2.95187  |
| ZNF808         | 3.68784  | 3.58433  | 3.19767   | 3.10212   | 1.80795    | 1.2008   |
| ZNF81          | 4.11471  | 4.1792   | 2.82771   | 2.7209    | 3.30547    | 3.32671  |
| ZNF813         | 3.13353  | 3.12455  | 1.33489   | 1.318     | -1.03019   | -1.43954 |
| ZNF814         | 4.92099  | 4.98542  | 4.51711   | 4.44186   | 5.20657    | 4.67902  |
| ZNF815P        | 0.537316 | 0.105383 | -0.496346 | -0.243552 | 1.48044    | 1.36896  |
| ZNF816         | 2.47346  | 2.51287  | 2.36327   | 2.43045   | 2.28914    | 2.86404  |
| ZNF816-ZNF321P | 0.192257 | 0.293253 | 1.00826   | 1.05979   | 1.31686    | 1.01711  |
| ZNF821         | 0.454239 | 0.018506 | 0.854921  | 0.996114  | 1.08749    | 1.02445  |
| ZNF823         | 1.82842  | 1.614    | 2.02596   | 2.26623   | 1.75757    | 1.82469  |
| ZNF826P        | 1.38843  | 1.36374  | 0.292311  | 0.0612232 | -6.64581 ? |          |
| ZNF827         | 4.68946  | 4.56437  | 3.27386   | 3.39499   | 4.53812    | 4.09418  |
| ZNF829         | 3.21381  | 3.2887   | 1.06446   | 0.833756  | 1.90196    | 1.97981  |
| ZNF83          | 3.72298  | 3.7052   | 4.30432   | 4.08346   | 3.91588    | 3.66476  |
| ZNF830         | 3.26526  | 3.47967  | 2.72037   | 3.16497   | 3.171      | 3.01097  |
| ZNF836         | 0.784713 | 0.659979 | 0.82042   | 1.01122   | 1.22184    | 1.46322  |
| ZNF839         | 3.0309   | 2.97906  | 1.90509   | 2.03228   | 2.08508    | 1.83021  |
| ZNF84          | 4.74799  | 4.78507  | 3.86904   | 3.80406   | 4.55401    | 4.43795  |
| ZNF841         | 3.26847  | 3.43245  | 3.37871   | 3.40181   | 3.5592     | 2.99263  |
| ZNF844         | 2.53934  | 2.33218  | 2.43854   | 2.34325   | 0.997957   | 0.50283  |
| ZNF845         | 3.48974  | 3.42688  | 2.87125   | 2.98854   | 3.15123    | 3.70903  |
| ZNF85          | 2.5663   | 2.49136  | 2.25729   | 2.1904    | 0.91718    | 0.952773 |



|             |            |           |           |            |           |           |
|-------------|------------|-----------|-----------|------------|-----------|-----------|
| ZNF850      | 3.94027    | 4.0695    | 2.23856   | 2.19953    | 2.38389   | 1.82469   |
| ZNF852      | 2.12343    | 2.22717   | 1.91332   | 1.94094    | 1.80698   | 1.28103   |
| ZNF853      | -5.69162 ? |           | 1.48894   | 1.08105    | -3.48878  | -4.70296  |
| ZNF860      | 2.63502    | 2.85004   | -2.09546  | -2.20128   | 1.81139   | 1.66836   |
| ZNF862      | 1.88642    | 1.73084   | 2.6423    | 2.82211    | 1.36868   | 0.780436  |
| ZNF865      | 0.430296   | 0.060836  | 0.208904  | 0.535117   | 0.847548  | 0.0747657 |
| ZNF879      | 1.28965    | 1.3251    | 0.860939  | 0.0410467  | -2.48959  | -3.12051  |
| ZNF880      | 2.48333    | 1.83639   | 1.90926   | 1.47617    | 0.159978  | -1.18284  |
| ZNF883      | 3.54766    | 3.74294   | 0.53081   | 0.476226   | 2.70164   | 3.01097   |
| ZNF891      | 3.94543    | 4.19941   | 2.18852   | 2.16467    | 2.93386   | 2.55508   |
| ZNF90       | 3.06254    | 2.98057   | 1.43603   | 1.90366    | 0.57918   | 1.76133   |
| ZNF91       | 4.64298    | 4.41366   | 5.20863   | 5.06889    | 4.63571   | 4.43921   |
| ZNF92       | 3.93638    | 3.79994   | 3.79231   | 3.74956    | 4.56366   | 4.52799   |
| ZNF93       | 3.08311    | 3.26526   | 1.92802   | 2.12835    | -1.07506  | -0.662104 |
| ZNFX1       | 6.16926    | 6.19907   | 6.17894   | 6.53456    | 6.32391   | 6.28491   |
| ZNHIT1      | 4.68344    | 4.62186   | 4.54024   | 4.83006    | 4.74378   | 5.12015   |
| ZNHIT2      | 1.11475    | 1.01295   | -0.11729  | 0.19507    | 0.69732   | 1.00759   |
| ZNHIT3      | 3.54668    | 3.60367   | 3.58738   | 3.91304    | 3.92161   | 4.59268   |
| ZNHIT6      | 4.1187     | 4.32993   | 4.14066   | 4.42547    | 4.62162   | 4.53408   |
| ZNRD1       | 2.27089    | 2.44871   | 2.14225   | 2.29721    | 2.7482    | 3.44097   |
| ZNRD1-AS1   | 3.00751    | 2.87203   | 3.75534   | 3.65607    | 3.09799   | 2.82966   |
| ZNRF1       | 2.92198    | 2.49678   | 3.63637   | 3.56491    | 2.46641   | 1.56011   |
| ZNRF2       | 2.73571    | 2.61155   | 2.88477   | 2.63122    | 3.00912   | 2.78752   |
| ZNRF3       | 3.52732    | 3.64306   | 3.39202   | 3.52234    | 2.90575   | 2.83633   |
| ZPR1        | 4.33681    | 4.51438   | 4.04809   | 4.6203     | 5.58624   | 5.74134   |
| ZRANB1      | 4.53041    | 4.4246    | 4.61766   | 4.8521     | 4.82457   | 4.80168   |
| ZRANB2      | 5.75268    | 5.73109   | 6.24339   | 6.28652    | 6.00043   | 5.63621   |
| ZRANB3      | 3.02202    | 2.71956   | 1.96116   | 2.12001    | 2.71256   | 3.02121   |
| ZRSR1       | -0.162472  | 0.41778   | 0.579006  | 0.944783   | -0.749861 | -2.17176  |
| ZRSR2       | 1.31172    | 1.59087   | 1.30488   | 1.54091    | 1.24368   | 0.463298  |
| ZSCAN12     | 3.14799    | 3.19715   | 3.3749    | 3.51871    | 0.823578  | 1.06153   |
| ZSCAN16     | 1.38263    | 1.69247   | 1.08139   | 1.17529    | 2.42157   | 2.5173    |
| ZSCAN16-AS1 | -0.561392  | -0.568099 | 0.0346524 | 0.319629   | 0.810591  | 0.847941  |
| ZSCAN18     | 1.76447    | 1.55586   | -1.35334  | -1.86039 ? | ?         |           |
| ZSCAN2      | 2.52215    | 2.33497   | 3.07315   | 3.20098    | 2.02486   | 1.62242   |
| ZSCAN20     | 2.91011    | 2.99249   | 2.759     | 2.91355    | 3.23299   | 2.96925   |
| ZSCAN21     | 2.91512    | 2.931     | 2.46237   | 2.78957    | 2.76134   | 2.99172   |
| ZSCAN22     | 2.2018     | 2.15923   | 2.27592   | 2.24874    | 2.79708   | 2.18205   |
| ZSCAN23     | -0.413499  | -0.27286  | 1.91453   | 1.6394 ?   | ?         |           |
| ZSCAN25     | 4.27246    | 4.31029   | 4.14626   | 4.37095    | 4.06931   | 4.05317   |
| ZSCAN26     | 2.89898    | 3.01895   | 2.80963   | 3.0686     | 3.70312   | 4.06312   |
| ZSCAN29     | 4.58741    | 4.65153   | 4.12936   | 4.13553    | 5.00676   | 4.73623   |
| ZSCAN30     | 3.17887    | 3.38015   | 3.89225   | 3.90168    | 2.31312   | 2.07665   |
| ZSCAN31     | 0.539412   | 0.318612  | 3.20018   | 2.76154    | 3.3298    | 3.20618   |
| ZSCAN32     | 2.98029    | 2.86833   | 2.85227   | 3.0634     | 2.81116   | 2.85455   |
| ZSCAN5A     | 1.66681    | 1.51716   | 1.33777   | 1.79049    | 1.58646   | 1.45229   |
| ZSCAN9      | 2.57006    | 2.73192   | 2.70218   | 2.80706    | 3.77744   | 3.43795   |
| ZSWIM1      | 3.16667    | 2.99454   | 3.07387   | 3.31744    | 2.87886   | 2.76902   |
| ZSWIM3      | 1.84784    | 1.76119   | 1.5913    | 1.8454     | 1.46385   | 1.41227   |
| ZSWIM4      | 2.56067    | 2.33158   | 2.17405   | 2.06112    | 3.07947   | 2.45317   |
| ZSWIM5      | 0.676033   | 0.676628  | 0.584741  | -0.0642959 | 2.50712   | 1.87827   |
| ZSWIM6      | 3.79277    | 3.59649   | 4.64302   | 4.54042    | 4.5745    | 3.91899   |

|              |           |           |          |          |            |           |
|--------------|-----------|-----------|----------|----------|------------|-----------|
| ZSWIM7       | 2.39369   | 2.3773    | 1.91979  | 2.0561   | 3.07394    | 2.87776   |
| ZSWIM8       | 4.5724    | 4.25241   | 4.51011  | 4.58505  | 5.16779    | 4.84011   |
| ZUFSP        | 2.44049   | 2.49717   | 2.47113  | 2.67582  | 3.19144    | 3.4607    |
| ZW10         | 2.7726    | 3.02299   | 4.29017  | 4.71613  | 3.87981    | 4.17287   |
| ZWILCH       | 4.64913   | 4.96927   | 4.01535  | 4.56875  | 4.78079    | 5.73781   |
| ZWINT        | 5.59639   | 5.52049   | 5.10533  | 5.39548  | 5.1686     | 4.96923   |
| ZXDA         | 0.59986   | 0.408136  | 0.499231 | 0.392515 | 2.01449    | 1.95322   |
| ZXDB         | 2.65306   | 2.70698   | 2.40248  | 2.78422  | 3.45516    | 3.08042   |
| ZXDC         | 3.6727    | 3.70331   | 3.9509   | 3.94509  | 3.56971    | 3.08771   |
| ZYG11A       | 2.07902   | 2.27188 ? |          | -4.52056 | -5.65305 ? |           |
| ZYG11B       | 5.37906   | 5.47707   | 5.4964   | 5.79691  | 5.27596    | 5.3533    |
| ZYX          | 4.66285   | 4.73989   | 3.83467  | 3.98657  | 4.49768    | 4.49541   |
| ZZEF1        | 5.22565   | 5.17875   | 5.89362  | 5.87732  | 6.01936    | 5.63867   |
| ZZZ3         | 5.79949   | 5.72419   | 5.67015  | 5.75959  | 6.35612    | 6.61383   |
| bP-21264C1.1 | -0.459286 | -0.368926 | 1.2088   | 0.789354 | -1.60029   | -1.38442  |
| bP-21264C1.2 | 1.32133   | 1.24121   | 2.24601  | 2.20668  | -0.576704  | -0.577229 |
| bP-2171C21.6 | -0.145242 | -0.334076 | 0.914572 | 0.833424 | 1.43774    | 1.1007    |
| bP-2189O9.2  | 0.254933  | 0.26265   | 2.11805  | 1.81052  | -0.673562  | -1.57134  |
| pk           | 5.82932   | 5.89284   | 6.93909  | 7.30592  | 5.44387    | 5.33728   |
| uc_338       | 0.34872   | 0.0217356 | 0.634575 | 0.705093 | 0.281028   | -0.400336 |
