# Supplementary material for: The long non-coding RNA HOTAIRM1 promotes tumor aggressiveness and radiotherapy resistance in glioblastoma
Source: PubMed Central journal article supplement (PMC8478910; doi:10.1038/s41419-021-04146-0), 2021-09-28
Supplement: 41419_2021_4146_MOESM15_ESM.pdf [file 41419_2021_4146_MOESM15_ESM.pdf]

**Supplementary Table 4****GSEA based on RNA sequencing upon *HOTAIRMI* siRNA-mediated knockdown in glioblastoma cells.**

Positively enriched genesets in the *HOTAIRMI* knockdown cells are listed according to their normalized expression score values. NES: normalized expression score; NOM: nominal; FDR: false discovery rate.

| <b>GeneSet details</b>                                         | <b>NES</b> | <b>NOM<br/><i>p</i>-value</b> | <b>FDR<br/><i>q</i>-value</b> |
|----------------------------------------------------------------|------------|-------------------------------|-------------------------------|
| CADHERIN SIGNALING PATHWAY_PANTHER<br>PATHWAY_P00012           | 2.11899    | <0.001                        | 0.16766                       |
| LIMB DEVELOPMENT_GOBP_GO:0060173                               | 2.01167    | 0.00238                       | 0.30982                       |
| APPENDAGE DEVELOPMENT_GOBP_GO:0048736                          | 1.99275    | <0.001                        | 0.25373                       |
| APPENDAGE MORPHOGENESIS_GOBP_GO:0035107                        | 1.93417    | <0.001                        | 0.34565                       |
| HISTONE-LYSINE N-METHYLTRANSFERASE<br>ACTIVITY_GOMF_GO:0018024 | 1.92291    | <0.001                        | 0.30706                       |

**Supplementary Table 5**

**GSEA based on RNA sequencing upon *HOTAIRMI* siRNA-mediated knockdown in glioblastoma cells.** Top 10 negatively enriched genesets in the *HOTAIRMI* knockdown cells are listed according to their normalized expression score values. NES: normalized expression score; NOM: nominal; FDR: false discovery rate.

| <b>GeneSet details</b>                                                                                                                      | <b>NES</b> | <b>NOM<br/><i>p</i>-value</b> | <b>FDR<br/><i>q</i>-value</b> |
|---------------------------------------------------------------------------------------------------------------------------------------------|------------|-------------------------------|-------------------------------|
| RUNX1 REGULATES TRANSCRIPTION OF GENES INVOLVED IN DIFFERENTIATION OF HSCS_REACTOME DATABASE ID RELEASE 61_8939236                          | -2.22344   | <0.001                        | <0.001                        |
| REGULATION OF MITOTIC CELL CYCLE_REACTOME DATABASE ID RELEASE 61_453276                                                                     | -2.17473   | <0.001                        | <0.001                        |
| ACTIVATED PKN1 STIMULATES TRANSCRIPTION OF AR (ANDROGEN RECEPTOR) REGULATED GENES KLK2 AND KLK3_REACTOME_R-HSA-5625886.1                    | -2.16665   | <0.001                        | 3.36E-04                      |
| DEPOSITION OF NEW CENPA-CONTAINING NUCLEOSOMES AT THE CENTROMERE_REACTOME_R-HSA-606279.1                                                    | -2.16189   | <0.001                        | 2.52E-04                      |
| RESPIRATORY ELECTRON TRANSPORT, ATP SYNTHESIS BY CHEMIOSMOTIC COUPLING, AND HEAT PRODUCTION BY UNCOUPLING PROTEINS,_REACTOME_R-HSA-163200.1 | -2.15902   | <0.001                        | 2.01E-04                      |
| APC C-MEDIATED DEGRADATION OF CELL CYCLE PROTEINS_REACTOME DATABASE ID RELEASE 61_174143                                                    | -2.15268   | <0.001                        | 4.19E-04                      |
| APC C:CDC20 MEDIATED DEGRADATION OF MITOTIC PROTEINS_REACTOME_R-HSA-176409.2                                                                | -2.15107   | <0.001                        | 3.59E-04                      |
| ACTIVATION OF APC C AND APC C:CDC20 MEDIATED DEGRADATION OF MITOTIC PROTEINS_REACTOME DATABASE ID RELEASE 61_176814                         | -2.15100   | <0.001                        | 3.14E-04                      |
| NUCLEOSOME ASSEMBLY_REACTOME_R-HSA-774815.1                                                                                                 | -2.15021   | <0.001                        | 2.79E-04                      |
| RNA POLYMERASE I PROMOTER OPENING_REACTOME_R-HSA-73728.2                                                                                    | -2.14531   | <0.001                        | 2.51E-04                      |

## Supplementary Table 6

**GSEA results using proteomic data upon *HOTAIRMI* siRNA-mediated knockdown.** Top 10 positively enriched genesets in the *HOTAIRMI* knockdown cells are listed according to their normalized expression score values. NES: normalized expression score; NOM: nominal; FDR: false discovery rate.

| <b>GeneSet details</b>                                                                                            | <b>NES</b> | <b>NOM<br/><i>p</i>-value</b> | <b>FDR<br/><i>q</i>-value</b> |
|-------------------------------------------------------------------------------------------------------------------|------------|-------------------------------|-------------------------------|
| CLASS I MHC MEDIATED ANTIGEN PROCESSING & PRESENTATION_REACTOME_R-HSA-983169.3                                    | 2.30708    | <0.001                        | 5.23E-04                      |
| GOLGI VESICLE TRANSPORT_GOBP_GO:0048193                                                                           | 2.21344    | <0.001                        | 0.005067                      |
| REGULATION OF PHOSPHATASE ACTIVITY_GOBP_GO:0010921                                                                | 2.19807    | <0.001                        | 0.005149                      |
| ANTIGEN PRESENTATION: FOLDING, ASSEMBLY AND PEPTIDE LOADING OF CLASS I MHC_REACTOME DATABASE ID RELEASE 61_983170 | 2.1921     | <0.001                        | 0.004262                      |
| PROTEIN UBIQUITINATION INVOLVED IN UBIQUITIN-DEPENDENT PROTEIN CATABOLIC PROCESS_GOBP_GO:0042787                  | 2.12129    | <0.001                        | 0.010577                      |
| ER TO GOLGI ANTEROGRADE TRANSPORT_REACTOME_R-HSA-199977.3                                                         | 2.12091    | <0.001                        | 0.008901                      |
| ANTIGEN PROCESSING: UBIQUITINATION & PROTEASOME DEGRADATION_REACTOME DATABASE ID RELEASE 61_983168                | 2.11776    | <0.001                        | 0.007933                      |
| TRANSPORT TO THE GOLGI AND SUBSEQUENT MODIFICATION_REACTOME_R-HSA-948021.2                                        | 2.10455    | <0.001                        | 0.008475                      |
| GOLGI-TO-ER RETROGRADE TRANSPORT_REACTOME DATABASE ID RELEASE 61_8856688                                          | 2.07161    | <0.001                        | 0.01416                       |
| REGULATION OF DEPHOSPHORYLATION_GOBP_GO:0035303                                                                   | 2.05964    | 9.29E-04                      | 0.015143                      |

**Supplementary Table 7**

**GSEA using proteomic data upon *HOTAIRMI* siRNA-mediated knock-down.** Top 10 negatively enriched genesets in the *HOTAIRMI* knockdown cells are listed according to their normalized expression score values. NES: normalized expression score; NOM: nominal; FDR: false discovery rate.

| <b>GeneSet details</b>                                                                 | <b>NES</b> | <b>NOM</b>            | <b>FDR</b>            |
|----------------------------------------------------------------------------------------|------------|-----------------------|-----------------------|
|                                                                                        |            | <b><i>p</i>-value</b> | <b><i>q</i>-value</b> |
| RIBOSOME BIOGENESIS_GOBP_GO:0042254                                                    | -3.206222  | <0.001                | <0.001                |
| RNA PROCESSING_GOBP_GO:0006396                                                         | -3.094729  | <0.001                | <0.001                |
| RRNA PROCESSING_GOBP_GO:0006364                                                        | -3.088324  | <0.001                | <0.001                |
| RRNA PROCESSING_REACTOME_R-HSA-72312.3                                                 | -3.081031  | <0.001                | <0.001                |
| MAJOR PATHWAY OF RRNA PROCESSING IN THE NUCLEOLUS AND CYTOSOL_REACTOME_R-HSA-6791226.3 | -3.06467   | <0.001                | <0.001                |
| RRNA PROCESSING IN THE NUCLEUS AND CYTOSOL_REACTOME_R-HSA-8868773.2                    | -3.03982   | <0.001                | <0.001                |
| RRNA METABOLIC PROCESS_GOBP_GO:0016072                                                 | -3.029373  | <0.001                | <0.001                |
| RIBONUCLEOPROTEIN COMPLEX BIOGENESIS_GOBP_GO:0022613                                   | -2.961836  | <0.001                | <0.001                |
| NCRNA PROCESSING_GOBP_GO:0034470                                                       | -2.935496  | <0.001                | <0.001                |
| STRUCTURAL CONSTITUENT OF RIBOSOME_GOMF_GO:0003735                                     | -2.858148  | <0.001                | <0.001                |

**Supplementary Table 8**

**GSEA of integrated proteogenomic datasets obtained upon *HOTAIRMI* siRNA-mediated knock-down in glioma cells.** The genesets printed in red color are mitochondria-related genesets. The genesets are listed according to the RNA sequencing *q*-values. RNA-seq: RNA sequencing; NES: normalized expression score; NOM: nominal; FDR: false discovery rate.

| GeneSet details                                                              | RNA-seq NES | RNA-seq NOM <i>p</i> -value | RNA-seq FDR <i>q</i> -value | Proteomics NES | Proteomics NOM <i>p</i> -value | Proteomics FDR <i>q</i> -value |
|------------------------------------------------------------------------------|-------------|-----------------------------|-----------------------------|----------------|--------------------------------|--------------------------------|
| MITOCHONDRIAL INNER                                                          | -2.108      | <0.001                      | 0.00014                     | -2.072         | <0.001                         | 0.01962                        |
| MEMBRANE_GOCC_GO:0005743                                                     |             |                             |                             |                |                                |                                |
| STRUCTURAL CONSTITUENT OF RIBOSOME_GOMF_GO:0003735                           | -2.100      | <0.001                      | 0.00017                     | -2.858         | <0.001                         | <0.001                         |
| MITOCHONDRIAL TRANSLATION ELONGATION_REACTOME_R-HSA-5389840.1                | -2.092      | <0.001                      | 0.00019                     | -2.306         | <0.001                         | 0.00112                        |
| RIBOSOMAL SUBUNIT_GOCC_GO:0044391                                            | -2.141      | <0.001                      | 0.00021                     | -2.715         | <0.001                         | <0.001                         |
| MITOCHONDRIAL TRANSLATION INITIATION_REACTOME DATABASE ID RELEASE 61_5368286 | -2.082      | <0.001                      | 0.00022                     | -2.345         | <0.001                         | 0.00061                        |
| MITOCHONDRIAL TRANSLATION_REACTOME DATABASE ID RELEASE 61_5368287            | -2.074      | <0.001                      | 0.00023                     | -2.330         | <0.001                         | 0.00074                        |
| RIBOSOME_GOCC_GO:0005840                                                     | -2.073      | <0.001                      | 0.00023                     | -2.707         | <0.001                         | <0.001                         |
| MITOCHONDRIAL TRANSLATIONAL ELONGATION_GOBP_GO:007012 5                      | -2.075      | <0.001                      | 0.00023                     | -2.307         | <0.001                         | 0.00109                        |
| TRANSLATION_REACTOME_R-HSA-72766.3                                           | -2.073      | <0.001                      | 0.00024                     | -2.206         | <0.001                         | 0.00472                        |
| TRANSLATION_GOBP_GO:00064                                                    | -2.068      | <0.001                      | 0.00024                     | -2.084         | <0.001                         | 0.01834                        |

---

|                                                                          |        |        |         |         |        |         |
|--------------------------------------------------------------------------|--------|--------|---------|---------|--------|---------|
| MITOCHONDRIAL<br>TRANSLATION<br>TERMINATION_REACTOME_R-<br>HSA-5419276.1 | -2.063 | <0.001 | 0.00028 | -2.337  | <0.001 | 0.00065 |
| ORGANELLE INNER<br>MEMBRANE_GOCC_GO:0019866                              | -2.058 | <0.001 | 0.00033 | -2.066  | <0.001 | 0.02018 |
| MITOCHONDRIAL<br>TRANSLATION_GOBP_GO:00325<br>43                         | -2.043 | <0.001 | 0.00038 | -2.225  | <0.001 | 0.00370 |
| PEPTIDE BIOSYNTHETIC<br>PROCESS_GOBP_GO:0043043                          | -2.050 | <0.001 | 0.00039 | -1.994  | <0.001 | 0.03187 |
| LARGE RIBOSOMAL<br>SUBUNIT_GOCC_GO:0015934                               | -2.045 | <0.001 | 0.00039 | -2.524  | <0.001 | <0.001  |
| TRANSLATIONAL<br>ELONGATION_GOBP_GO:000641<br>4                          | -2.046 | <0.001 | 0.00040 | -2.289  | <0.001 | 0.00142 |
| MITOCHONDRIAL<br>TRANSLATIONAL<br>TERMINATION_GOBP_GO:00701<br>26        | -2.039 | <0.001 | 0.00042 | -2.3571 | <0.001 | 0.00048 |
| AMIDE BIOSYNTHETIC<br>PROCESS_GOBP_GO:0043604                            | -2.030 | <0.001 | 0.00046 | -1.935  | <0.001 | 0.04255 |
| ORGANELLAR<br>RIBOSOME_GOCC_GO:0000313                                   | -2.025 | <0.001 | 0.00051 | -2.288  | 0.0021 | 0.00142 |
| MITOCHONDRIAL GENE<br>EXPRESSION_GOBP_GO:0140053                         | -2.011 | <0.001 | 0.00062 | -2.278  | <0.001 | 0.00158 |
| MITOCHONDRIAL<br>RIBOSOME_GOCC_GO:0005761                                | -2.002 | <0.001 | 0.00070 | -2.263  | <0.001 | 0.00199 |

---

**Supplementary Table 10**

**List of top significantly upregulated proteins following *HOTAIRMI* stable knockdown in LN-229 glioblastoma cells.** The proteins are listed according to their *q*-values.

| <b>Protein ID</b> | <b>Description</b>                                                         | <b>Fold change</b> | <b><i>p</i>-value</b> | <b><i>q</i>-value</b> |
|-------------------|----------------------------------------------------------------------------|--------------------|-----------------------|-----------------------|
| L1CAM             | Neural cell adhesion molecule L1                                           | 1.74303            | 2.01E-06              | 0.00362               |
| LCN2              | Neutrophil gelatinase-associated lipocalin                                 | 12.0809            | 1.11E-05              | 0.00385               |
| HSD17B10          | 3-hydroxyacyl-CoA dehydrogenase type-2                                     | 1.91749            | 6.58E-06              | 0.00385               |
| AKR1C3            | Aldo-keto reductase family 1 member C3                                     | 1.99863            | 2.18E-05              | 0.00522               |
| CALB2             | Calretinin                                                                 | 1.85151            | 5.60E-05              | 0.01011               |
| KYNU              | Kynureninase                                                               | 1.91012            | 0.00011               | 0.01627               |
| DYNLRB1           | Dynein light chain roadblock-type 1                                        | 1.58320            | 0.00012               | 0.01642               |
| ANKRD52           | Serine/threonine-protein phosphatase 6 regulatory ankyrin repeat subunit C | 3.11078            | 0.00021               | 0.02369               |
| RAP1GAP2          | Rap1 GTPase-activating protein 2                                           | 1.64261            | 0.00024               | 0.02369               |
| PDLIM4            | PDZ and LIM domain protein 4                                               | 1.64951            | 0.00048               | 0.03625               |
| INF2              | Inverted formin-2                                                          | 1.62381            | 0.00047               | 0.03625               |
| AKR1B1            | Aldose reductase                                                           | 1.75732            | 0.00059               | 0.04126               |
| GAK               | Cyclin-G-associated kinase                                                 | 1.75092            | 0.00096               | 0.04641               |
| SLC2A1            | Solute carrier family 2, facilitated glucose transporter member 1          | 1.57233            | 0.00091               | 0.04641               |
| L3HYPDH           | Trans-L-3-hydroxyproline dehydratase                                       | 1.53126            | 0.00099               | 0.04641               |
| DDT               | D-dopachrome decarboxylase                                                 | 1.64757            | 0.00109               | 0.04672               |

### Supplementary Table 11

**List of top significantly downregulated proteins following *HOTAIRMI* stable knockdown in LN-229 glioblastoma cells.** The proteins are listed according to their *q*-values. Transglutaminase 2 (TGM2) is used for further assays and is highlighted.

| <b>Protein ID</b> | <b>Description</b>                                 | <b>Fold change</b> | <b><i>p</i>-value</b> | <b><i>q</i>-value</b> |
|-------------------|----------------------------------------------------|--------------------|-----------------------|-----------------------|
| TMEM87A           | Transmembrane protein 87A                          | -6.44115           | 1.28E-05              | 0.00385               |
| MYO6              | Myosin-VI                                          | -3.57295           | 1.00E-05              | 0.00385               |
| RFTN1             | Raftlin                                            | -1.84698           | 4.56E-06              | 0.00385               |
| NGFR              | Nerve growth factor receptor                       | -15.5604           | 2.31E-05              | 0.00522               |
| <b>TGM2</b>       | <b>Transglutaminase 2</b>                          | <b>-1.62376</b>    | <b>3.20E-05</b>       | <b>0.00641</b>        |
| HAT1              | Histone acetyltransferase type B catalytic subunit | -1.61425           | 0.00011               | 0.01627               |
| SLC4A7            | Sodium bicarbonate cotransporter 3                 | -2.20409           | 0.00024               | 0.02369               |
| PKN2              | Serine/threonine-protein kinase N2                 | -1.69435           | 0.00032               | 0.02888               |
| C16orf58          | Chromosome 16 open reading frame 58                | -2.21576           | 0.00037               | 0.03146               |
| SORT1             | Sortilin                                           | -2.08654           | 0.00059               | 0.04126               |
| UBR1              | E3 ubiquitin-protein ligase UBR1                   | -1.57988           | 0.00070               | 0.04252               |
| HSPA14            | Heat shock 70 kDa protein 14                       | -2.13546           | 0.00091               | 0.04641               |

**Supplementary Table 12**

**List of microRNAs predicted to bind to *HOTAIRMI* and the mRNAs of one or more of the 12 downregulated proteins identified upon *HOTAIRMI* knockdown in LN-229 cells.** microRNAs are ranked based on *p*-values.

*TGM2* is highlighted in the table. miRNA: microRNA; mRNA: messenger RNA; TCGA: The Cancer Genome Atlas.

| <b>miRNA</b>  | <b>mRNA</b> | <b>TCGA correlation</b> | <b><i>p</i>-value</b> |
|---------------|-------------|-------------------------|-----------------------|
| hsa-miR-17-5p | <b>TGM2</b> | -0.397026               | 3.29E-05              |
| hsa-miR-93    | <b>TGM2</b> | -0.395785               | 3.50E-05              |
| hsa-miR-95    | <b>TGM2</b> | -0.354698               | 0.0002368             |
| hsa-miR-20b   | <b>TGM2</b> | -0.343056               | 0.00038901            |
| hsa-miR-328   | <b>TGM2</b> | -0.342861               | 0.00039218            |
| hsa-miR-106a  | <b>TGM2</b> | -0.327445               | 0.00073486            |
| hsa-miR-20a   | <b>TGM2</b> | -0.321762               | 0.00091882            |
| hsa-miR-20b   | RFTN1       | -0.317927               | 0.00106573            |
| hsa-miR-130b  | <b>TGM2</b> | -0.315417               | 0.00117314            |
| hsa-miR-17-5p | RFTN1       | -0.310938               | 0.00138963            |
| hsa-miR-93    | RFTN1       | -0.305739               | 0.001686              |
| hsa-miR-153   | RFTN1       | -0.296443               | 0.00236182            |
| hsa-miR-153   | <b>TGM2</b> | -0.295234               | 0.00246571            |
| hsa-miR-95    | RFTN1       | -0.285786               | 0.0034302             |
| hsa-miR-92    | SORT1       | -0.28524                | 0.00349507            |
| hsa-miR-106b  | <b>TGM2</b> | -0.281732               | 0.00393889            |
| hsa-miR-106a  | RFTN1       | -0.253882               | 0.00966134            |
| hsa-miR-95    | SLC4A7      | -0.25275                | 0.0100009             |
| hsa-miR-25    | NGFR        | -0.252134               | 0.0101904             |
| hsa-miR-101   | <b>TGM2</b> | -0.24385                | 0.0130574             |
| hsa-miR-598   | <b>TGM2</b> | -0.239846               | 0.0146794             |
| hsa-miR-92    | <b>TGM2</b> | -0.234186               | 0.0172689             |
| hsa-miR-328   | SORT1       | -0.232079               | 0.018329              |
| hsa-miR-20a   | RFTN1       | -0.224141               | 0.0228423             |
| hsa-miR-328   | RFTN1       | -0.223122               | 0.0234852             |
| hsa-miR-25    | <b>TGM2</b> | -0.219973               | 0.0255714             |
| hsa-miR-17-5p | SORT1       | -0.217921               | 0.0270137             |
| hsa-miR-148b  | SLC4A7      | -0.205092               | 0.0376912             |
| hsa-miR-130b  | SORT1       | -0.203905               | 0.0388369             |
| hsa-miR-130b  | RFTN1       | -0.201252               | 0.0415039             |
| hsa-miR-106b  | RFTN1       | -0.198482               | 0.0444489             |
| hsa-miR-328   | HAT1        | -0.1969                 | 0.046208              |

---

|              |       |           |           |
|--------------|-------|-----------|-----------|
| hsa-miR-20a  | SORT1 | -0.196052 | 0.0471739 |
| hsa-miR-148b | RFTN1 | -0.194955 | 0.0484485 |
| hsa-miR-106a | SORT1 | -0.194221 | 0.0493178 |

---
