# Supplementary material for: The long non-coding RNA HOTAIRM1 promotes tumor aggressiveness and radiotherapy resistance in glioblastoma
Source: PubMed Central journal article supplement (PMC8478910; doi:10.1038/s41419-021-04146-0), 2021-09-28
Supplement: 41419_2021_4146_MOESM17_ESM.pdf [file 41419_2021_4146_MOESM17_ESM.pdf]

# DECLARATION OF CONTRIBUTIONS TO ARTICLE

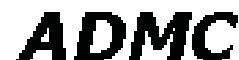

Manuscript Number:

CDDIS-20-2007

Journal Name:

*Cell Death & Disease*

(the 'Journal')

Proposed Title of the Contribution:

The long non-coding RNA HOTAIRM1 promotes tumor aggressiveness and radiotherapy resistance in glioblastoma

(the 'Contribution')

Author(s):

Ulvi Ahmadov, Daniel Picard, Jasmin Bartl, Manuela Silginer, Marija Trajkovic-Arsic, Nan Qin, Alina Marie Winkelkotte, Marlen Melcher, Maike Langini, Lena Blümel, Viktoria Marquardt, Anja Stefanski, Sasha Steltgens, Christina Hasslepien, Anna Kauffhold, Frauke-Dorothee Meyer, Annette Seibt, Lara Kleinesudeik, Anika Hain, Carsten Münk, Christiane Brigitte Knobbe-Thomsen, Alexander Schramm, Ute Fischer, Gabriel Leprivier, Kai Stühler, Simone Fulda, Jens Sveke, Felix Distelmaier, Arndt Borkhardt, Michael Weller, Patrick Roth, Guido Reifenberger, Marc Remke

(the 'Authors')

For all *CDDis* articles, each person named as an author in the published version must be able to show he or she has contributed substantially to the article.

Authorship credit should be based on 1) substantial contributions to conception and design, acquisition of data, or analysis and interpretation of data; 2) drafting the article or revising it critically for important intellectual content; and 3) final approval of the version to be published. Authors should meet conditions 1, 2 and 3.

Any person who cannot be shown to have made a substantial contribution to the article cannot be listed as an author in the final version. The name of any person who is deemed to have made a minor contribution can, however, appear in the Acknowledgments section of the article.

Please complete the table below to indicate the contributions of all named authors to the manuscript.

Author Full Name:

Specification of Contribution to the Manuscript:

|                         |                                                                                                                           |
|-------------------------|---------------------------------------------------------------------------------------------------------------------------|
| Ulvi Ahmadov            | Conception and design, acquisition of data, and analysis and interpretation of data, drafting the article and revising it |
| Daniel Picard           | Conception and design, acquisition of data, and analysis and interpretation of data, drafting the article and revising it |
| Jasmin Bartl            | Conception and design, and analysis and interpretation of data, drafting the article and revising it                      |
| Manuela Silginer        | Design, acquisition of data, and analysis and interpretation of data                                                      |
| Marija Trajkovic-Arsic  | Contributing the manuscript with important intellectual content                                                           |
| Nan Qin                 | Contributing the manuscript with important intellectual content                                                           |
| Alina Marie Winkelkotte | Contributing the manuscript with important intellectual content                                                           |
| Marlen Melcher          | Design, acquisition of data, and analysis and interpretation of data                                                      |
| Maike Langini           | Design, acquisition of data, and analysis and interpretation of data                                                      |
| Lena Blümel             | Design, acquisition of data, and analysis and interpretation of data                                                      |
| Viktoria Marquardt      | Contributing the manuscript with important intellectual content                                                           |
| Anja Stefanski          | Design, acquisition of data, and analysis and interpretation of data                                                      |
| Sasha Steltgens         | Contributing the manuscript with important intellectual content                                                           |

# DECLARATION OF CONTRIBUTIONS TO ARTICLE

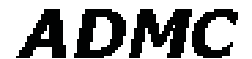

Manuscript Number:

CDDIS-20-2007

Journal Name:

*Cell Death & Disease*

(the 'Journal')

Proposed Title of the Contribution:

The long non-coding RNA HOTAIRM1 promotes tumor aggressiveness and radiotherapy resistance in glioblastoma

(the 'Contribution')

Author(s):

Ulvi Ahmadov, Daniel Picard, Jasmin Bartl, Manuela Silgner, Marija Trajkovic-Arsic, Nan Qin, Alina Marie Winkelkotte, Marlen Melcher, Maike Langini, Lena Blümel, Viktoria Marquardt, Anja Stefanski, Sasha Steltgens, Christina Hassiepen, Anna Kaufhold, Frauke-Dorothee Meyer, Annette Seibt, Lara Kleinesudeik, Anika Hain, Carsten Münk, Christiane Brigitte Knobbe-Thomsen, Alexander Schramm, Ute Fischer, Gabriel Leprivier, Kai Stühler, Simone Fulda, Jens Sveke, Felix Distelmaier, Arndt Borkhardt, Michael Weller, Patrick Roth, Guido Reifenberger, Marc Remke

(the 'Authors')

For all *CDDis* articles, each person named as an author in the published version must be able to show he or she has contributed substantially to the article.

Authorship credit should be based on 1) substantial contributions to conception and design, acquisition of data, or analysis and interpretation of data; 2) drafting the article or revising it critically for important intellectual content; and 3) final approval of the version to be published. Authors should meet conditions 1, 2 and 3.

Any person who cannot be shown to have made a substantial contribution to the article cannot be listed as an author in the final version. The name of any person who is deemed to have made a minor contribution can, however, appear in the Acknowledgments section of the article.

Please complete the table below to indicate the contributions of all named authors to the manuscript.

Author Full Name:

Specification of Contribution to the Manuscript:

|                                    |                                                                 |
|------------------------------------|-----------------------------------------------------------------|
| Christina Hassiepen                | Contributing the manuscript with important intellectual content |
| Anna Kaufhold                      | Acquisition and analysis of data                                |
| Frauke-Dorothee Meyer              | Acquisition and analysis of data                                |
| Annette Seibt                      | Acquisition and analysis of data                                |
| Lara Kleinesudeik                  | Contributing the manuscript with important intellectual content |
| Anika Hain                         | Contributing the manuscript with important intellectual content |
| Carsten Münk                       | Contributing the manuscript with important intellectual content |
| Christiane Brigitte Knobbe-Thomsen | Contributing the manuscript with important intellectual content |
| Alexander Schramm                  | Contributing the manuscript with important intellectual content |
| Ute Fischer                        | Contributing the manuscript with important intellectual content |
| Gabriel Leprivier                  | Contributing the manuscript with important intellectual content |
| Kai Stühler                        | Contributing the manuscript with important intellectual content |
| Simone Fulda                       | Contributing the manuscript with important intellectual content |

# DECLARATION OF CONTRIBUTIONS TO ARTICLE

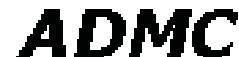

Manuscript Number:

CDDIS-20-2007R

Journal Name:

*Cell Death & Disease*

(the 'Journal')

Proposed Title of the Contribution:

The long non-coding RNA HOTAIRM1 promotes tumor aggressiveness and radiotherapy resistance in glioblastoma

(the 'Contribution')

Author(s):

Ulvi Ahmadov, Daniel Picard, Jasmin Bartl, Manuela Silgner, Marija Trajkovic-Arsic, Nan Qin, Marietta Wolter, Jonathan K. M. Lim, David Pauck, Alina Marie Winkelkotte, Marlen Melcher, Maïke Langini, Lena Blümel, Viktoria Marquardt, Felix Sahn, Anja Stefanski, Sasha Steltgens, Christina Hassiepen, Anna Kaufhold, Frauke-Dorothee Meyer, Annette Seibt, Lara Kleinesudeik, Anika Hain, Carsten Münk, Christiane Brigitte Knobbe-Thomsen, Alexander Schramm, Ute Fischer, Gabriel Leprévier, Kai Stühler, Simone Fulda, Jens Siveke, Felix Distelmaier, Arndt Borkhardt, Michael Weller, Patrick Roth, Guido Reifenberger, Marc Remke

(the 'Authors')

For all *CDDis* articles, each person named as an author in the published version must be able to show he or she has contributed substantially to the article.

Authorship credit should be based on 1) substantial contributions to conception and design, acquisition of data, or analysis and interpretation of data; 2) drafting the article or revising it critically for important intellectual content; and 3) final approval of the version to be published. Authors should meet conditions 1, 2 and 3.

Any person who cannot be shown to have made a substantial contribution to the article cannot be listed as an author in the final version. The name of any person who is deemed to have made a minor contribution can, however, appear in the Acknowledgments section of the article.

Please complete the table below to indicate the contributions of all named authors to the manuscript.

| Author Full Name:  | Specification of Contribution to the Manuscript:                                                                                   |
|--------------------|------------------------------------------------------------------------------------------------------------------------------------|
| Jens Siveke        | Revising the manuscript critically for important intellectual content; and doing the final approval of the version to be published |
| Felix Distelmaier  | Revising the manuscript critically for important intellectual content; and doing the final approval of the version to be published |
| Arndt Borkhardt    | Revising the manuscript critically for important intellectual content; and doing the final approval of the version to be published |
| Michael Weller     | Revising the manuscript critically for important intellectual content; and doing the final approval of the version to be published |
| Patrick Roth       | Revising the manuscript critically for important intellectual content; and doing the final approval of the version to be published |
| Guido Reifenberger | Revising the manuscript critically for important intellectual content; and doing the final approval of the version to be published |
| Marc Remke         | Revising the manuscript critically for important intellectual content; and doing the final approval of the version to be published |
| Marietta Wolter    | performed experiments for the manuscript revision                                                                                  |
| Jonathan K. M. Lim | performed experiments for the manuscript revision                                                                                  |
| David Pauck        | performed experiments for the manuscript revision                                                                                  |
| Felix Sander       | performed experiments for the manuscript revision                                                                                  |
|                    |                                                                                                                                    |
|                    |                                                                                                                                    |

Please complete the table below to indicate the contributions of all named authors to the figures.

Figure 1:

DP acquired and analyzed the data, and prepared all the panels. AB, MW, PR, GR and MR did the revision and the final approval

Figure 2:

panel A-D: UA generated the data; UA, DP and JB designed and prepared all the panels. AB, MW, PR, GR and MR did the revision and the final approval

Figure 3:

panel A: AK and AS generated the data, and DP and ML analyzed the data, KS interpreted the data, DP prepared the panel; panel B: MM generated the data, MM and UA analyzed and prepared the panel, FD interpreted the data; panel C: UA generated the data, UA, DP and JB prepared the panel. AB, MW, PR, GR and MR did the revision and the final approval

Figure 4:

panel A-C: UA generated the data, UA and DP designed and analyzed the data; panel D-E: MS generated and analyzed the data, UA, DP, JB and MS prepared the panels. AB, MW, PR, GR and MR did the revision and the final approval

Figure 5:

panel A: UA generated the data, NQ, UA and DP designed and analyzed the data; panel B-C: LB and UA generated the data, UA and DP analyzed the data; panel C: UA and DP prepared the panel. AB, MW, PR, GR and MR did the revision and the final approval

Figure 6:

panel A-C: UA generated the data; UA, DP and JB designed and prepared all the panels. AB, MW, PR, GR and MR did the revision and the final approval

Signed for and on behalf of the Author(s):



Print Name:

Marc Remke

Date:

26-06-2020
