# Supplementary material for: The long non-coding RNA HOTAIRM1 promotes tumor aggressiveness and radiotherapy resistance in glioblastoma
Source: Springer Nature journal article supplement (doi:10.1038/s41419-021-04146-0), 2021-09-28
Supplement: MOESM12 [file 41419_2021_4146_MOESM12_ESM.pdf]

**Supplementary Table 1. List of lncRNAs used for the Volcano plot**

| <b>Probe ID</b> | <b>Gene Symbol</b> | <b>Fold Change</b> | <b>P Value</b> |
|-----------------|--------------------|--------------------|----------------|
| 229782_at       | RMST               | 3.636649035        | 0.000168308    |
| 238021_s_at     | CRNDE              | 2.913392397        | 0.008799548    |
| 1557051_s_at    | HOTAIRM1           | 2.460288269        | 0.014781021    |
| 238022_at       | CRNDE              | 2.371453092        | 0.008632333    |
| 228642_at       | HOTAIRM1           | 2.334469921        | 0.025503153    |
| 239153_at       | HOTAIR             | 1.948787255        | 0.038329668    |
| 235292_at       | FLJ32255           | 1.842214613        | 0.008873885    |
| 1557050_at      | HOTAIRM1           | 1.822677264        | 0.025906264    |
| 237189_at       | HOXB-AS1           | 1.819193248        | 0.005389652    |
| 234989_at       | NEAT1              | 1.742027557        | 0.031432957    |
| 213340_s_at     | TP73-AS1           | 1.729012422        | 0.037771583    |
| 214077_x_at     | MEIS3P1            | 1.695902792        | 0.003650158    |
| 232090_at       | DNM3OS             | 1.683495182        | 0.060970009    |
| 232752_at       | LOXL1-AS1          | 1.665393029        | 0.061404607    |
| 208816_x_at     | ANXA2P2            | 1.645311079        | 0.082458646    |
| 238320_at       | NEAT1              | 1.629975982        | 0.084841469    |
| 225239_at       | NEAT1              | 1.596143821        | 0.10593236     |
| 231925_at       | RP11-38P22.2       | 1.547676756        | 0.117320372    |
| 1566968_at      | SPRY4-IT1          | 1.540394515        | 0.150010207    |
| 232242_at       | PTPRG-AS1          | 1.524804972        | 0.013714417    |
| 233198_at       | GOLGA2P5           | 1.507360746        | 0.037839011    |
| 235291_s_at     | FLJ32255           | 1.490989736        | 0.031577727    |
| 1555907_at      | AGAP2-AS1          | 1.4758727          | 0.203940404    |
| 217551_at       | OR7E14P            | 1.456449363        | 0.056282813    |
| 1556364_at      | ADAMTS9-AS2        | 1.453308222        | 0.12348221     |
| 214823_at       | ZNF204P            | 1.435975317        | 0.136763193    |
| 241607_at       | LOC730102          | 1.43492702         | 0.040832792    |
| 1557241_a_at    | RP11-524D16__A.3   | 1.434857561        | 0.089201968    |
| 220244_at       | LINC00312          | 1.433609139        | 0.015961321    |
| 228658_at       | MIAT               | 1.429858642        | 0.302893798    |
| 1560431_at      | RP11-87H9.3        | 1.429829313        | 0.021771783    |
| 227062_at       | NEAT1              | 1.42824586         | 0.233880179    |
| 215513_at       | HYMAI              | 1.418865863        | 0.071077021    |
| 1559117_at      | RP11-399K21.12     | 1.413653674        | 0.023074787    |
| 227868_at       | LOC154761          | 1.413146523        | 0.187498123    |
| 220609_at       | LOC202181          | 1.408907267        | 0.103668107    |
| 214740_at       | POLR2J4            | 1.402378742        | 0.013554623    |
| 1558354_s_at    | RP1-1J6.2          | 1.396842462        | 0.104518574    |
| 230595_at       | PGM5-AS1           | 1.390845609        | 0.005024037    |
| 233249_at       | LOC100507073       | 1.389395612        | 0.036658184    |
| 1561759_at      | LOC645513          | 1.386193483        | 0.006500854    |
| 233947_s_at     | TBX5-AS1           | 1.380897357        | 0.080342577    |
| 1556378_a_at    | LOC440896          | 1.376236822        | 0.063984012    |
| 229015_at       | LOC286367          | 1.375719307        | 0.012065296    |
| 230882_at       | DLX6-AS1           | 1.366457302        | 0.397707447    |
| 244571_s_at     | RP11-159N11.4      | 1.365705498        | 0.003445356    |
| 244512_at       | HOXB-AS1           | 1.362344995        | 0.009225247    |

|              |               |             |             |
|--------------|---------------|-------------|-------------|
| 1559965_at   | ZFHX4-AS1     | 1.361752393 | 0.225539098 |
| 227168_at    | MIAT          | 1.359944087 | 0.240388746 |
| 203360_s_at  | GJA9-MYCBP    | 1.359465806 | 0.088566007 |
| 222180_at    | RP11-769O8.3  | 1.358659397 | 0.130640988 |
| 243362_s_at  | LEF1-AS1      | 1.355139053 | 0.015330859 |
| 241713_s_at  | DYX1C1-CCPG1  | 1.345984142 | 0.067497589 |
| 207063_at    | TTY14         | 1.345826917 | 0.151081631 |
| 1562633_at   | RMST          | 1.344302029 | 0.003667378 |
| 236692_at    | RP11-686D22.8 | 1.343186612 | 0.113371232 |
| 239999_at    | LINC00478     | 1.336226264 | 0.063607131 |
| 229543_at    | RP1-93H18.6   | 1.336062024 | 0.057542325 |
| 224566_at    | NEAT1         | 1.334762787 | 0.216526993 |
| 236115_at    | HTR7P1        | 1.332780438 | 0.063056135 |
| 237250_at    | RP11-320H14.1 | 1.331037856 | 0.456030685 |
| 239975_at    | HLA-DPB2      | 1.329677959 | 0.010412392 |
| 230861_at    | DKFZP434L187  | 1.328452413 | 0.213650729 |
| 216950_s_at  | FCGR1C        | 1.322585963 | 0.190698008 |
| 232172_at    | CD99P1        | 1.321922758 | 0.008435534 |
| 238127_at    | GAS6-AS1      | 1.32176548  | 0.150399469 |
| 239675_at    | LINC00900     | 1.317523054 | 0.057575227 |
| 237291_at    | PRORS1P       | 1.310741836 | 0.015226251 |
| 232878_at    | NR2F2-AS1     | 1.307321049 | 0.188680104 |
| 216333_x_at  | TNXA          | 1.306490718 | 0.139710144 |
| 1559296_at   | ADAMTS9-AS2   | 1.306254006 | 0.168899132 |
| 230505_at    | LOC145474     | 1.306048628 | 0.202305154 |
| 214110_s_at  | LOC654342     | 1.302829496 | 0.129866584 |
| 232309_at    | LOC202181     | 1.299600331 | 0.044703762 |
| 213339_at    | TP73-AS1      | 1.294124204 | 0.006408052 |
| 225214_at    | LOC100129034  | 1.292569275 | 0.089524605 |
| 228158_at    | LOC654342     | 1.292278979 | 0.098453945 |
| 239919_at    | TBX5-AS1      | 1.289907521 | 0.109292331 |
| 213380_x_at  | MST1P2        | 1.285851049 | 0.064358056 |
| 201911_s_at  | FARP1-IT1     | 1.28405992  | 0.030953199 |
| 60815_at     | POLR2J4       | 1.279959323 | 0.091406024 |
| 204961_s_at  | NCF1B         | 1.278926417 | 0.062447234 |
| 239556_at    | LOC645513     | 1.278396659 | 0.224337657 |
| 206093_x_at  | TNXA          | 1.275949205 | 0.157614282 |
| 235469_at    | FAM133DP      | 1.274826028 | 0.146850769 |
| 1553634_a_at | WEE2-AS1      | 1.272557761 | 0.013626216 |
| 213451_x_at  | TNXA          | 1.269942957 | 0.193260527 |
| 1569973_at   | SEPT7P2       | 1.269598914 | 0.001604512 |
| 239847_at    | RP11-33E12.2  | 1.269594011 | 0.118228542 |
| 243124_at    | RRN3P2        | 1.268650187 | 0.078637278 |
| 240177_at    | RP11-218C14.8 | 1.265518276 | 0.126004398 |
| 211038_s_at  | CROCCP2       | 1.265161706 | 0.102953375 |
| 1569318_at   | LINC00663     | 1.264348507 | 0.020264804 |
| 227437_at    | DYNLL1-AS1    | 1.262364399 | 0.043015939 |
| 1564166_s_at | LOC100630923  | 1.260952722 | 0.021066994 |
| 1561341_at   | RP11-595O22.1 | 1.260840861 | 0.35681424  |
| 215629_s_at  | DLEU2L        | 1.260181512 | 0.080402379 |

|              |               |             |             |
|--------------|---------------|-------------|-------------|
| 238854_at    | DYNLL1-AS1    | 1.258892348 | 0.039764281 |
| 1562904_s_at | FAM86B3P      | 1.255330629 | 0.038529126 |
| 1568838_at   | WASIR1        | 1.254772783 | 0.082219711 |
| 216336_x_at  | MT1P3         | 1.252864466 | 0.23202123  |
| 1569315_s_at | LINC00894     | 1.251980029 | 0.078489836 |
| 1559492_at   | LOC100506844  | 1.250652753 | 0.44973644  |
| 1561292_at   | RP11-37C7.3   | 1.248309576 | 0.004226852 |
| 1556003_a_at | RP11-356K23.1 | 1.24744459  | 0.069917551 |
| 229283_at    | LOC728613     | 1.243460242 | 0.027797324 |
| 201910_at    | FARP1-IT1     | 1.24256798  | 0.057336834 |
| 208609_s_at  | TNXA          | 1.241413696 | 0.155209845 |
| 231436_at    | RP11-489D6.2  | 1.24055253  | 0.023520968 |
| 224565_at    | NEAT1         | 1.240262049 | 0.350980591 |
| 1562938_at   | FAHD2CP       | 1.240208063 | 0.374525393 |
| 243363_at    | LEF1-AS1      | 1.240048875 | 0.008285821 |
| 1559957_a_at | LOC642852     | 1.239059098 | 0.177285547 |
| 1561692_at   | RP11-319G9.3  | 1.237539049 | 0.119817714 |
| 214084_x_at  | NCF1C         | 1.236733286 | 0.073314988 |
| 230351_at    | FGF14-AS2     | 1.234599534 | 0.174456283 |
| 238085_at    | RP11-1191J2.2 | 1.23268491  | 0.148829567 |
| 227940_at    | LOC339803     | 1.232206312 | 0.175251013 |
| 231470_at    | LINC00664     | 1.230688226 | 0.057183996 |
| 1560019_at   | DLGAP1-AS2    | 1.230047193 | 0.074951195 |
| 214473_x_at  | PMS2P3        | 1.230039872 | 0.006407421 |
| 65585_at     | FAM86DP       | 1.228803369 | 0.023996013 |
| 231366_at    | FDPSP2        | 1.227561287 | 0.005746967 |
| 1561511_at   | RP11-510C10.4 | 1.22250522  | 0.232049147 |
| 221973_at    | LOC100506123  | 1.22244579  | 0.313748409 |
| 216870_x_at  | DLEU2         | 1.22196585  | 0.06349276  |
| 243020_at    | FAM13A-AS1    | 1.218165556 | 0.071147069 |
| 225907_at    | LOC728743     | 1.217671953 | 0.147432188 |
| 236892_s_at  | HOXB-AS3      | 1.2169326   | 0.048520601 |
| 238559_at    | RP11-568N6.1  | 1.216009647 | 0.108029549 |
| 213089_at    | LOC100272216  | 1.215519207 | 0.305330861 |
| 1556026_at   | LINC00893     | 1.215190045 | 0.013219698 |
| 234049_at    | FAM86B3P      | 1.215157818 | 0.069167545 |
| 206685_at    | HCG4          | 1.215048235 | 0.080698227 |
| 213460_x_at  | NSUN5P2       | 1.214669186 | 0.05079391  |
| 234340_at    | RP4-614O4.12  | 1.214618145 | 0.089091946 |
| 1568854_at   | LINC00240     | 1.21453613  | 0.102863756 |
| 242770_at    | LOC642236     | 1.213681036 | 0.170827369 |
| 215667_x_at  | PMS2P1        | 1.213178556 | 0.016746367 |
| 213670_x_at  | NSUN5P1       | 1.212930786 | 0.046446166 |
| 1569974_x_at | SEPT7P2       | 1.211541644 | 0.002752464 |
| 204060_s_at  | PRKY          | 1.211109259 | 0.251541098 |
| 210109_at    | SND1-IT1      | 1.210417412 | 0.113300627 |
| 216525_x_at  | PMS2P3        | 1.207125617 | 0.022439346 |
| 227996_at    | FARP1-IT1     | 1.205658051 | 0.372950232 |
| 1559901_s_at | LINC00478     | 1.20409379  | 0.094898925 |
| 242699_at    | RP11-642D21.1 | 1.202640602 | 0.460014799 |

|              |                        |             |             |
|--------------|------------------------|-------------|-------------|
| 213842_x_at  | NSUN5P2                | 1.202251022 | 0.057566078 |
| 1558666_at   | PHEX-AS1               | 1.20214224  | 0.088307701 |
| 226582_at    | LOC400043              | 1.201217223 | 0.38470809  |
| 235482_at    | PCBP1-AS1              | 1.201197448 | 0.189474213 |
| 228913_at    | TPT1-AS1               | 1.200747178 | 0.162229612 |
| 1569794_at   | RP4-742J24.2           | 1.200550339 | 0.061407319 |
| 1560156_at   | RP11-705C15.3          | 1.198558432 | 0.101574065 |
| 240809_at    | ZNF295-AS1             | 1.198415696 | 0.033800697 |
| 1561761_x_at | LOC645513              | 1.197621983 | 0.026277747 |
| 1562012_at   | LOC100506730           | 1.195067375 | 0.203581389 |
| 1555981_at   | ASB16-AS1              | 1.193862902 | 0.061947903 |
| 1558653_at   | MLK7-AS1               | 1.193351859 | 0.061066645 |
| 1570208_at   | LINC00907              | 1.192270961 | 0.079469687 |
| 1564139_at   | A2M-AS1                | 1.189977655 | 0.303318001 |
| 1558430_at   | RP11-680G24.5          | 1.189171993 | 0.271503704 |
| 214100_x_at  | NSUN5P1                | 1.187783683 | 0.059173233 |
| 229059_at    | FAM225B                | 1.185927835 | 0.301988567 |
| 213893_x_at  | PMS2P5                 | 1.185254615 | 0.02654715  |
| 229874_x_at  | RP11-108M9.4           | 1.184902716 | 0.073110078 |
| 227074_at    | LOC100131564           | 1.184426495 | 0.115258179 |
| 235263_at    | STAG3L2                | 1.18393751  | 0.167837231 |
| 215318_at    | MINOS1P1               | 1.183889989 | 0.250213377 |
| 215057_at    | LINC00894              | 1.183287039 | 0.101573347 |
| 233530_at    | RP11-314N13.3          | 1.183066633 | 0.053844744 |
| 224293_at    | TTY10                  | 1.182469202 | 0.206780303 |
| 1554771_at   | RP11-690I21.2          | 1.182464481 | 0.221726826 |
| 223724_s_at  | STAG3L2                | 1.181823412 | 0.078090013 |
| 1559433_at   | APCDD1L-AS1            | 1.181345669 | 0.017555476 |
| 236228_at    | LOC100130744           | 1.179901778 | 0.048014274 |
| 1557262_at   | RP11-66N24.3           | 1.179166946 | 0.021500707 |
| 1558750_a_at | LOC100288637           | 1.177784371 | 0.439192948 |
| 221191_at    | STAG3L1                | 1.176704962 | 0.27333549  |
| 215920_s_at  | PDXDC2P                | 1.175225946 | 0.086250788 |
| 1560797_s_at | TMLHE-AS1              | 1.175113987 | 0.0831058   |
| 1557558_s_at | MATN1-AS1              | 1.174517564 | 0.181710293 |
| 215966_x_at  | GK3P                   | 1.172393898 | 0.04940198  |
| 214712_at    | SNX29P2                | 1.171774886 | 0.143125573 |
| 241658_at    | RP11-1006G14.4         | 1.169788747 | 0.180295951 |
| 235242_at    | RP11-373L24.1          | 1.169278473 | 0.191787585 |
| 232881_at    | GNAS-AS1               | 1.168981781 | 0.180902463 |
| 1564372_s_at | CASC2                  | 1.168526332 | 0.069380604 |
| 206742_at    | PIR-FIGF               | 1.167664526 | 0.037624068 |
| 210707_x_at  | DTX2P1-UPK3BP1-PMS2P11 | 1.167574378 | 0.019532955 |
| 236860_at    | NPY6R                  | 1.166198652 | 0.231161702 |
| 240219_at    | LINC00327              | 1.166127067 | 0.129163419 |
| 239113_at    | LOC100507468           | 1.165534985 | 0.099206037 |
| 210926_at    | POTEKP                 | 1.164880561 | 0.051103756 |
| 229280_s_at  | LINC00340              | 1.162130857 | 0.36866647  |
| 216242_x_at  | POLR2J4                | 1.160858427 | 0.158076203 |
| 208511_at    | PTTG3P                 | 1.16082224  | 0.167525912 |

|              |               |             |             |
|--------------|---------------|-------------|-------------|
| 230077_at    | LOC220729     | 1.16030001  | 0.322445527 |
| 209805_at    | PMS2CL        | 1.160198586 | 0.120296421 |
| 242528_at    | HOXA-AS2      | 1.159007841 | 0.180749872 |
| 1556931_at   | CDC42-IT1     | 1.158566075 | 0.31664929  |
| 207394_at    | ZNF137P       | 1.15800032  | 0.150243583 |
| 1568593_a_at | NUDT16P1      | 1.15796359  | 0.018391015 |
| 1556221_a_at | RP11-757F18.5 | 1.157645305 | 0.237843657 |
| 222208_s_at  | POLR2J4       | 1.156760126 | 0.106944484 |
| 227301_at    | CCT6P3        | 1.156696245 | 0.194647618 |
| 1556630_at   | CASC2         | 1.156536666 | 0.02633053  |
| 215599_at    | GUSBP9        | 1.156271629 | 0.419423377 |
| 220918_at    | RUNX1-IT1     | 1.156023485 | 0.238109535 |
| 230780_at    | LINC00886     | 1.154703758 | 0.076398355 |
| 226546_at    | LOC100506844  | 1.154411634 | 0.527615549 |
| 224517_at    | POLR2J4       | 1.15431927  | 0.193468657 |
| 228198_s_at  | FAHD2CP       | 1.154186715 | 0.477078788 |
| 230121_at    | SERTAD4-AS1   | 1.151704669 | 0.172615276 |
| 205518_s_at  | CMAHP         | 1.15160827  | 0.495081491 |
| 1563969_at   | FLJ33360      | 1.151274362 | 0.29713219  |
| 235691_at    | LOC729970     | 1.15019676  | 0.273500363 |
| 235606_at    | LINC00883     | 1.150011262 | 0.424487482 |
| 239246_at    | FARP1-IT1     | 1.149659886 | 0.492934647 |
| 1554907_a_at | HYDIN2        | 1.149506172 | 0.236822369 |
| 1561101_at   | JAKMIP2-AS1   | 1.149490994 | 0.227862572 |
| 216111_x_at  | PMS2P3        | 1.148962781 | 0.051741049 |
| 238716_at    | LOC100506990  | 1.147738384 | 0.235250954 |
| 1560536_at   | RP11-461A8.4  | 1.147526091 | 0.173162246 |
| 214756_x_at  | PMS2P1        | 1.146815807 | 0.037583796 |
| 1557845_at   | RP11-121L10.2 | 1.146290595 | 0.010196622 |
| 215412_x_at  | PMS2P5        | 1.146279367 | 0.090280857 |
| 1566557_at   | BAIAP2-AS1    | 1.146156047 | 0.357130579 |
| 1559412_at   | LINC00478     | 1.1459908   | 0.411677901 |
| 209607_x_at  | SLX1B-SULT1A4 | 1.145312574 | 0.128615312 |
| 239313_at    | LOC401320     | 1.144951657 | 0.230760253 |
| 240382_at    | RP3-512B11.3  | 1.144681513 | 0.303445529 |
| 228944_at    | RP4-773N10.4  | 1.144451311 | 0.131518361 |
| 1563897_at   | RP11-5O23.2   | 1.143368165 | 0.004575387 |
| 222312_s_at  | RP11-33E12.2  | 1.14315358  | 0.12646552  |
| 239269_at    | NEAT1         | 1.14286412  | 0.431021593 |
| 1561402_at   | LINC00880     | 1.142028253 | 0.281826909 |
| 228773_at    | LOC100506100  | 1.14199246  | 0.129884313 |
| 244481_at    | RP11-483I13.5 | 1.141692821 | 0.060947743 |
| 1569476_at   | DKFZP434L187  | 1.140985546 | 0.417219011 |
| 1569502_s_at | TP73-AS1      | 1.139582721 | 0.164366143 |
| 239243_at    | ZNF638-IT1    | 1.138729071 | 0.334953238 |
| 239466_at    | LINC00883     | 1.13837769  | 0.19562486  |
| 236109_at    | RP11-50B3.4   | 1.137820336 | 0.150007402 |
| 222245_s_at  | FER1L4        | 1.137432193 | 0.238245975 |
| 226332_at    | FAM133DP      | 1.136884104 | 0.07107573  |
| 216339_s_at  | TNXA          | 1.136565297 | 0.307847815 |

|              |                |             |             |
|--------------|----------------|-------------|-------------|
| 242518_at    | RAD51-AS1      | 1.135311064 | 0.331816324 |
| 1558404_at   | LINC00622      | 1.134838593 | 0.565016667 |
| 240572_s_at  | LOC374443      | 1.134433476 | 0.312141018 |
| 236250_at    | AFG3L1P        | 1.134241269 | 0.237137943 |
| 240365_at    | LINC00669      | 1.133236345 | 0.139920351 |
| 228571_at    | RBAKDN         | 1.1331019   | 0.110195852 |
| 230552_at    | LOC284412      | 1.132664313 | 0.419882378 |
| 235696_at    | RP11-11N9.4    | 1.132023632 | 0.542267678 |
| 223974_at    | DLGAP1-AS2     | 1.131847865 | 0.231511186 |
| 243224_at    | LOC100506302   | 1.131052436 | 0.309632649 |
| 243895_x_at  | RP11-380M21.4  | 1.130655294 | 0.075050721 |
| 226693_at    | SDHAP1         | 1.130039695 | 0.246425813 |
| 237031_at    | RP11-21L23.2   | 1.129985484 | 0.281325533 |
| 210886_x_at  | TP53TG1        | 1.129769984 | 0.153297957 |
| 210580_x_at  | SLX1B-SULT1A4  | 1.129668952 | 0.208457541 |
| 238432_at    | DLGAP1-AS1     | 1.129606013 | 0.204898516 |
| 1552607_at   | FAM223A        | 1.128207404 | 0.053054151 |
| 203245_s_at  | LINC00094      | 1.128193506 | 0.300108016 |
| 216843_x_at  | PMS2P1         | 1.127291736 | 0.053977259 |
| 1567359_at   | BDNF-AS        | 1.126975237 | 0.005027613 |
| 219139_s_at  | CROCCP3        | 1.126422447 | 0.189764462 |
| 215002_at    | LOC613037      | 1.126202239 | 0.089431266 |
| 243048_at    | CECR7          | 1.12589561  | 0.096452917 |
| 1563529_at   | HYDIN2         | 1.124900495 | 0.417615331 |
| 228528_at    | C1orf132       | 1.124577487 | 0.467252755 |
| 244695_at    | GHRLOS         | 1.124548531 | 0.223092822 |
| 242786_at    | SBF2-AS1       | 1.124547345 | 0.164948204 |
| 217485_x_at  | PMS2P1         | 1.124408234 | 0.06640152  |
| 241014_at    | FLG-AS1        | 1.124388453 | 0.505838519 |
| 1559966_a_at | ZFHX4-AS1      | 1.124312849 | 0.486746872 |
| 229917_at    | RP11-571M6.8   | 1.123612976 | 0.666190127 |
| 232571_at    | RP11-27M15.1   | 1.122986722 | 0.154555145 |
| 239210_at    | RP11-477H21.2  | 1.122733687 | 0.529836372 |
| 222274_at    | ZDHHC8P1       | 1.122613028 | 0.367020324 |
| 1553992_s_at | NBR2           | 1.121996123 | 0.331390363 |
| 229204_at    | RP5-930J4.4    | 1.12115611  | 0.190022762 |
| 238704_at    | RP11-498C9.15  | 1.120261442 | 0.405530726 |
| 228723_at    | NPTN-IT1       | 1.120086636 | 0.468729597 |
| 210876_at    | ANXA2P1        | 1.119203636 | 0.316170478 |
| 1552793_at   | C8orf31        | 1.118441846 | 0.563972389 |
| 1564371_a_at | CASC2          | 1.117929691 | 0.066642421 |
| 1560573_at   | LINC00944      | 1.117886841 | 0.076985592 |
| 1568685_at   | RP11-229P13.25 | 1.117717585 | 0.032331346 |
| 236756_at    | CENPVP2        | 1.117491858 | 0.06979953  |
| 232140_at    | LOC100132352   | 1.117249132 | 0.286283233 |
| 206819_at    | POM121L9P      | 1.117161992 | 0.52031647  |
| 213367_at    | LOC155060      | 1.116799976 | 0.216446161 |
| 219442_at    | CLUHP3         | 1.116303984 | 0.266760419 |
| 214526_x_at  | PMS2P1         | 1.115881607 | 0.137066066 |
| 221393_at    | TAAR3          | 1.114887741 | 0.133678772 |

|              |                       |             |             |
|--------------|-----------------------|-------------|-------------|
| 239699_s_at  | PMS2P5                | 1.114867645 | 0.190937611 |
| 215247_at    | LOC100288570          | 1.113149625 | 0.201661921 |
| 1558969_a_at | RPL32P3               | 1.112955804 | 0.247740758 |
| 1559543_at   | LINC00441             | 1.112011964 | 0.144030578 |
| 1557314_at   | DPY19L2P3             | 1.111857168 | 0.167674705 |
| 1558809_s_at | ZNF790-AS1            | 1.11165415  | 0.478512522 |
| 1559315_s_at | SOCS2-AS1             | 1.111427889 | 0.482158438 |
| 1559240_at   | LOC100507053          | 1.110594765 | 0.420175884 |
| 237322_at    | MIAT                  | 1.109772277 | 0.678976286 |
| 240557_at    | RP11-145F16.2         | 1.109532648 | 0.396216253 |
| 241468_at    | RP13-20L14.1          | 1.109515929 | 0.227700147 |
| 209917_s_at  | TP53TG1               | 1.108468583 | 0.286668493 |
| 237298_at    | FLJ26850              | 1.108339936 | 0.233572081 |
| 222087_at    | PVT1                  | 1.107597224 | 0.3665057   |
| 1558849_at   | LINC00908             | 1.107321314 | 0.046026351 |
| 1560637_at   | RP11-30L15.6          | 1.106987653 | 0.116363999 |
| 237357_at    | OSTM1-AS1             | 1.106597105 | 0.095705758 |
| 227591_at    | SH3BP5-AS1            | 1.106507399 | 0.403851099 |
| 1561110_at   | RP1-179N16.6          | 1.105786367 | 0.053521396 |
| 238881_at    | RP4-714D9.5           | 1.10558477  | 0.119124521 |
| 239950_at    | HOXA11-AS             | 1.105529108 | 0.231249806 |
| 229627_at    | LOC100499484-C9ORF174 | 1.105284649 | 0.460968863 |
| 232899_at    | RPL23AP7              | 1.105219947 | 0.244824792 |
| 237065_s_at  | LAMTOR5-AS1           | 1.10476052  | 0.3549242   |
| 1569089_a_at | LINC00957             | 1.104242087 | 0.162228178 |
| 239625_at    | RP11-1109F11.3        | 1.103877292 | 0.259986664 |
| 224507_s_at  | MGC12916              | 1.103795353 | 0.466798949 |
| 1565715_at   | RP11-388M20.6         | 1.103400985 | 0.075657553 |
| 1562568_at   | LOC400541             | 1.103225257 | 0.048379386 |
| 1568640_at   | PCBP1-AS1             | 1.103223096 | 0.193741993 |
| 232463_at    | LINC00685             | 1.103210815 | 0.370724513 |
| 230666_at    | HOXA11-AS             | 1.102963234 | 0.366138796 |
| 242723_at    | RP11-932O9.10         | 1.10292181  | 0.336570469 |
| 222055_at    | FAHD2CP               | 1.102883378 | 0.183251716 |
| 211241_at    | ANXA2P3               | 1.102853776 | 0.271144753 |
| 1553024_at   | DAOA-AS1              | 1.102681459 | 0.006391759 |
| 230948_at    | RP11-95D17.1          | 1.102504225 | 0.143752074 |
| 219876_s_at  | GOLGA2P5              | 1.102171559 | 0.294059738 |
| 232527_at    | PSMD6-AS2             | 1.102079534 | 0.37137194  |
| 240609_at    | LOC100996654          | 1.101730809 | 0.381444247 |
| 225857_s_at  | SNHG17                | 1.101649673 | 0.502721655 |
| 239521_at    | MFI2-AS1              | 1.101153877 | 0.302615235 |
| 1556004_at   | RP11-356K23.1         | 1.100742145 | 0.032093993 |
| 240890_at    | LOC643733             | 1.099878724 | 0.137427908 |
| 233602_at    | RP11-95O2.1           | 1.099223668 | 0.418837487 |
| 228629_s_at  | WWTR1-AS1             | 1.098658726 | 0.052883919 |
| 240017_at    | PCBP1-AS1             | 1.09858061  | 0.03189808  |
| 237225_at    | ZFY-AS1               | 1.097136428 | 0.081125201 |
| 229041_s_at  | ITGB2-AS1             | 1.095486587 | 0.448674222 |
| 1561319_at   | OTX2-AS1              | 1.094852315 | 0.318779078 |

|              |                |             |             |
|--------------|----------------|-------------|-------------|
| 207283_at    | RPL23AP32      | 1.094823857 | 0.48457268  |
| 214682_at    | PKD1P1         | 1.094657618 | 0.495804417 |
| 1559067_a_at | RP11-4O1.2     | 1.094613599 | 0.61716373  |
| 241366_at    | RBAKDN         | 1.094514721 | 0.519012851 |
| 1556220_at   | RP11-757F18.5  | 1.094197655 | 0.25400795  |
| 1563271_at   | RP11-1008C21.1 | 1.094130119 | 0.154354168 |
| 215009_s_at  | THAP9-AS1      | 1.094016263 | 0.465158106 |
| 228647_at    | LOC100049716   | 1.093908229 | 0.533721774 |
| 243813_at    | LINC00968      | 1.09341324  | 0.105871601 |
| 1558882_at   | HTATSF1P2      | 1.093286938 | 0.418243248 |
| 240912_x_at  | LINC00277      | 1.093208792 | 0.074667578 |
| 232715_at    | RP11-1024P17.1 | 1.093101126 | 0.011372374 |
| 1562681_at   | KRTAP5-AS1     | 1.09298748  | 0.266627576 |
| 244570_at    | RP1-151F17.1   | 1.092980666 | 0.433320873 |
| 238104_at    | LINC00106      | 1.092781526 | 0.215814324 |
| 244705_at    | RP11-3B12.1    | 1.091883258 | 0.11292418  |
| 1562167_a_at | DEFB122        | 1.091878342 | 0.034206329 |
| 1552868_at   | CIRBP-AS1      | 1.091844388 | 0.034737349 |
| 239151_at    | BMS1P5         | 1.091754603 | 0.538854883 |
| 236950_s_at  | LINC00964      | 1.09162691  | 0.398821847 |
| 220602_s_at  | LOC642423      | 1.091417615 | 0.263382194 |
| 235942_at    | FAM224B        | 1.091150052 | 0.100015458 |
| 231033_at    | RP11-408H20.1  | 1.090941815 | 0.075177512 |
| 215102_at    | DPY19L1P1      | 1.090745882 | 0.336147507 |
| 241434_at    | RP11-767N6.7   | 1.090696514 | 0.38913672  |
| 1570009_at   | LOC643711      | 1.090229365 | 0.038518264 |
| 227306_at    | RP11-363E7.4   | 1.090157762 | 0.358698452 |
| 233130_at    | THRB-IT1       | 1.089728261 | 0.598019725 |
| 242201_at    | PMS2P5         | 1.089718388 | 0.464631805 |
| 1569078_at   | LOC100294362   | 1.089345013 | 0.324470366 |
| 243656_at    | LOC642852      | 1.089336252 | 0.416608111 |
| 230080_at    | HOXA-AS2       | 1.089196326 | 0.354444404 |
| 235776_x_at  | LINC00475      | 1.088504658 | 0.090829533 |
| 238540_at    | LOC401320      | 1.088219731 | 0.441980468 |
| 1557869_at   | RP11-520H14.7  | 1.08814125  | 0.062451252 |
| 238463_at    | LOC100506834   | 1.087704902 | 0.126997238 |
| 242213_at    | RP11-727F15.11 | 1.08719521  | 0.296249349 |
| 235785_at    | RP5-991G20.4   | 1.087178275 | 0.308379265 |
| 234488_s_at  | GMCL1P1        | 1.087134741 | 0.477310663 |
| 226340_x_at  | WASH2P         | 1.086830663 | 0.464454583 |
| 1557261_at   | WHAMMP3        | 1.086768228 | 0.594990858 |
| 239873_at    | RP11-334J6.6   | 1.086563324 | 0.129929812 |
| 233069_at    | PPP4R1L        | 1.086480378 | 0.090002424 |
| 1561760_s_at | LOC645513      | 1.08632046  | 0.416282661 |
| 1559544_s_at | LINC00441      | 1.086235549 | 0.318817996 |
| 230653_at    | RP11-974F13.6  | 1.085921986 | 0.553853983 |
| 239993_at    | LOC390705      | 1.085826205 | 0.092615687 |
| 1559375_s_at | RP11-194N12.2  | 1.085666751 | 0.258378952 |
| 1566761_a_at | LINC00884      | 1.08547238  | 0.117336976 |
| 240014_at    | POLR2J4        | 1.085321155 | 0.376615544 |



|              |                  |             |             |
|--------------|------------------|-------------|-------------|
| 244489_at    | RP11-263K19.4    | 1.085033076 | 0.455014762 |
| 229609_at    | NUTM2A-AS1       | 1.084779071 | 0.339141538 |
| 1558290_a_at | PVT1             | 1.084717531 | 0.639925079 |
| 229699_at    | LOC100129550     | 1.08431219  | 0.484344037 |
| 227969_at    | PCBP1-AS1        | 1.083868415 | 0.352998274 |
| 233172_at    | LOC100507073     | 1.083669426 | 0.069946756 |
| 1568915_at   | U73166.2         | 1.083249296 | 0.451760292 |
| 207458_at    | RHPN1-AS1        | 1.083120251 | 0.266483196 |
| 231950_at    | ZNF658B          | 1.082964418 | 0.544140154 |
| 229006_at    | LOC100507487     | 1.082913689 | 0.390617206 |
| 1556257_at   | LOC645513        | 1.082502457 | 0.492418487 |
| 210241_s_at  | TP53TG1          | 1.082478234 | 0.305568661 |
| 1563745_a_at | ZMIZ1-AS1        | 1.082419984 | 0.207838971 |
| 234078_at    | ADAMTS9-AS2      | 1.082056487 | 0.36656792  |
| 1558850_s_at | LINC00908        | 1.081347946 | 0.231490491 |
| 227554_at    | MAGI2-AS3        | 1.081285969 | 0.586708365 |
| 223725_at    | LINC00852        | 1.080990918 | 0.24443816  |
| 1562764_at   | RP11-13K12.5     | 1.080575226 | 0.087392222 |
| 238932_at    | RP11-145F16.2    | 1.080352788 | 0.588562594 |
| 225035_x_at  | WASH2P           | 1.080352157 | 0.517420043 |
| 1553608_a_at | LINC00189        | 1.079812047 | 0.381827093 |
| 206021_at    | SCAND2P          | 1.079684611 | 0.441995504 |
| 1561037_a_at | RP11-396C23.2    | 1.07966761  | 0.168979865 |
| 216196_at    | HERC2P4          | 1.079568171 | 0.085473755 |
| 222947_at    | LOC100379224     | 1.078854981 | 0.622870154 |
| 239470_at    | C15orf56         | 1.078844617 | 0.22583926  |
| 241614_at    | RP11-471B22.2    | 1.078617721 | 0.222560208 |
| 242358_at    | RASSF8-AS1       | 1.078230845 | 0.632589491 |
| 231307_at    | RP11-382F24.2    | 1.078014149 | 0.013806652 |
| 238790_at    | LOC374443        | 1.077869953 | 0.511692248 |
| 221194_s_at  | TBC1D3P1-DHX40P1 | 1.077843865 | 0.605140213 |
| 242087_x_at  | MFI2-AS1         | 1.07784151  | 0.467692117 |
| 239612_at    | LOC100240734     | 1.077791143 | 0.364903631 |
| 233770_at    | RP1-86D1.3       | 1.077639568 | 0.565493104 |
| 235878_at    | RP11-95D17.1     | 1.077510115 | 0.408556724 |
| 210818_s_at  | GRIK1-AS2        | 1.077476953 | 0.51990964  |
| 231375_at    | RP11-1277A3.1    | 1.07722764  | 0.209921273 |
| 240063_at    | GUSBP5           | 1.076550811 | 0.418810124 |
| 231260_at    | ZNF582-AS1       | 1.076325998 | 0.592979581 |
| 1561478_at   | LINC00560        | 1.07612888  | 0.137073199 |
| 214657_s_at  | NEAT1            | 1.076013776 | 0.783664978 |
| 1556081_at   | RP11-16P6.1      | 1.07563134  | 0.700535473 |
| 217625_x_at  | LINC00963        | 1.075530915 | 0.46494987  |
| 234913_at    | TTY4B            | 1.075522832 | 0.091904547 |
| 232396_at    | RP11-617F23.2    | 1.075352962 | 0.552134446 |
| 230631_s_at  | IL10RB-AS1       | 1.075230852 | 0.297127067 |
| 1561666_a_at | PSMG3-AS1        | 1.075086057 | 0.406720296 |
| 1553881_at   | MGC16142         | 1.074672918 | 0.47147388  |
| 243871_at    | LOC100130476     | 1.074041533 | 0.150800404 |
| 206655_s_at  | SEPT5-GP1BB      | 1.073735029 | 0.67717871  |

|              |               |             |             |
|--------------|---------------|-------------|-------------|
| 1557263_s_at | RP11-66N24.3  | 1.073515314 | 0.378954176 |
| 228549_at    | RP11-285F7.2  | 1.07350947  | 0.516404774 |
| 1556262_at   | PWRN1         | 1.073452006 | 0.174101808 |
| 1556639_at   | LOC100996455  | 1.073307551 | 0.448422663 |
| 222290_at    | OR2A9P        | 1.07317114  | 0.530607545 |
| 218296_x_at  | MSTO2P        | 1.072761789 | 0.245329622 |
| 230491_at    | RP11-174G6.5  | 1.072716953 | 0.425103714 |
| 223945_x_at  | RP9P          | 1.072410383 | 0.42711608  |
| 1562638_at   | LOC339874     | 1.072301695 | 0.142549078 |
| 233176_at    | LOC100507642  | 1.071852378 | 0.384306194 |
| 227390_at    | MEG3          | 1.071822095 | 0.641141854 |
| 217261_at    | TTY2B         | 1.071789633 | 0.563540636 |
| 1565073_at   | RP11-118G23.1 | 1.070979039 | 0.124058486 |
| 235779_at    | ZNF790-AS1    | 1.070682908 | 0.663156227 |
| 1559651_at   | CSNK1A1P1     | 1.070655522 | 0.056994593 |
| 236632_at    | HHIP-AS1      | 1.070646125 | 0.465382861 |
| 237267_at    | LOC100506675  | 1.070620595 | 0.090648285 |
| 1564224_x_at | C1RL-AS1      | 1.070462447 | 0.204837673 |
| 242893_at    | RP11-3L8.3    | 1.070018576 | 0.08700577  |
| 232645_at    | LOC153684     | 1.069928429 | 0.588867238 |
| 1559136_s_at | LINC00894     | 1.06987285  | 0.271087545 |
| 1557190_at   | RP11-511H23.2 | 1.069771814 | 0.224318548 |
| 238553_at    | BMS1P5        | 1.069742315 | 0.506538056 |
| 243629_x_at  | MFI2-AS1      | 1.069561613 | 0.549463319 |
| 1560176_s_at | PPP4R1L       | 1.069525673 | 0.096552689 |
| 227631_at    | RP11-363J17.1 | 1.069476823 | 0.258951379 |
| 240447_at    | HYI-AS1       | 1.069466449 | 0.26948481  |
| 1555614_at   | SUGT1P1       | 1.069450716 | 0.149844373 |
| 236856_x_at  | RP11-458D21.2 | 1.069441793 | 0.662422606 |
| 228826_at    | BZRAP1-AS1    | 1.069415143 | 0.56782365  |
| 219173_at    | MYO15B        | 1.069104744 | 0.423279649 |
| 1557862_at   | LOC654841     | 1.068899224 | 0.072945282 |
| 230251_at    | LINC00473     | 1.068761622 | 0.206352519 |
| 228055_at    | NAPSB         | 1.068711458 | 0.789605859 |
| 228828_at    | BZRAP1-AS1    | 1.068629815 | 0.444053421 |
| 1569332_at   | LINC00488     | 1.068519377 | 0.444645905 |
| 1567361_at   | BDNF-AS       | 1.068498023 | 0.3451866   |
| 236654_s_at  | RP11-362K14.7 | 1.068479649 | 0.501446061 |
| 1561106_at   | LINC00271     | 1.068401585 | 0.336680688 |
| 1558425_x_at | LINC00265     | 1.068309321 | 0.286602729 |
| 1560690_at   | RP11-159H3.2  | 1.068150026 | 0.11838483  |
| 242393_x_at  | BMS1P5        | 1.068119103 | 0.550759653 |
| 1566147_a_at | ANKRD20A12P   | 1.067742892 | 0.473673847 |
| 1560147_at   | WDR86-AS1     | 1.067647628 | 0.181751931 |
| 232241_at    | LINC00894     | 1.067482319 | 0.112773336 |
| 219563_at    | LINC00341     | 1.067467822 | 0.708632345 |
| 1560957_at   | RP5-857K21.5  | 1.067376784 | 0.269736133 |
| 1556222_at   | SEPT7P9       | 1.067134712 | 0.221044394 |
| 1554733_at   | LOC728175     | 1.067041271 | 0.177845649 |
| 243686_at    | RP11-438B23.2 | 1.067031182 | 0.722185986 |

|              |               |             |             |
|--------------|---------------|-------------|-------------|
| 1558123_at   | LINC00957     | 1.066947617 | 0.53085534  |
| 212732_at    | MEG3          | 1.066858614 | 0.87841316  |
| 1566108_at   | RP11-362K14.5 | 1.066783221 | 0.309211929 |
| 1556798_a_at | RNF144A-AS1   | 1.06670715  | 0.503687352 |
| 1566605_at   | RP11-48G14.2  | 1.066661984 | 0.357028098 |
| 1552468_a_at | DSCR10        | 1.066446488 | 0.107154132 |
| 240194_at    | LOC441204     | 1.066338445 | 0.603241062 |
| 214148_at    | LOC100507424  | 1.066140284 | 0.548934202 |
| 227640_s_at  | RP9P          | 1.066128858 | 0.486945132 |
| 228441_s_at  | RP11-164P12.5 | 1.066037132 | 0.473803137 |
| 1564208_x_at | LINC00957     | 1.065756921 | 0.372202234 |
| 1553817_at   | POM121L10P    | 1.065675142 | 0.215421507 |
| 233320_at    | TCAM1P        | 1.065652862 | 0.471528958 |
| 1569607_s_at | ANKRD20A11P   | 1.06514245  | 0.801285875 |
| 237848_at    | LOC100996671  | 1.065127242 | 0.054065936 |
| 244269_at    | RP11-321E2.4  | 1.064846609 | 0.117834482 |
| 236246_x_at  | LOC653160     | 1.064833612 | 0.20863839  |
| 1558660_at   | LINC00703     | 1.064815742 | 0.225433797 |
| 220694_at    | ASAP1-IT1     | 1.064771939 | 0.638455133 |
| 244620_at    | SLC8A1-AS1    | 1.064684681 | 0.425583343 |
| 215288_at    | TRPC2         | 1.06439406  | 0.202263501 |
| 1560306_at   | RP11-68I3.11  | 1.064383274 | 0.55420979  |
| 214123_s_at  | NOP14-AS1     | 1.064167858 | 0.566914092 |
| 235010_at    | ZBED5-AS1     | 1.064030804 | 0.601448323 |
| 235314_at    | RPL32P3       | 1.063887978 | 0.348001411 |
| 1562152_at   | RP5-933E2.1   | 1.063620392 | 0.167225972 |
| 1569785_at   | RP11-456K23.1 | 1.063505043 | 0.49054474  |
| 234611_at    | LGALS8-AS1    | 1.063385501 | 0.212229306 |
| 230743_at    | HOXB-AS3      | 1.063353595 | 0.137356339 |
| 1561327_at   | LINC00242     | 1.063226279 | 0.302156531 |
| 1556229_at   | RP11-235E17.4 | 1.063131118 | 0.487476769 |
| 235428_at    | LOC100507316  | 1.063071807 | 0.751562506 |
| 1552717_s_at | CEP170P1      | 1.062843043 | 0.635792311 |
| 240423_at    | LOC441204     | 1.062515699 | 0.7763529   |
| 243059_at    | FENDRR        | 1.062122996 | 0.221112878 |
| 1569263_at   | RP13-516M14.8 | 1.062033654 | 0.518420674 |
| 1563913_at   | RP11-572M11.3 | 1.061987946 | 0.100037457 |
| 1569372_at   | LOC100507194  | 1.061984226 | 0.377088208 |
| 1570298_at   | RP11-863H1.1  | 1.06097807  | 0.105215796 |
| 1553518_at   | DEFT1P2       | 1.060898117 | 0.081688801 |
| 242331_x_at  | LOC642236     | 1.060882531 | 0.198737163 |
| 231062_at    | DOCK9-AS2     | 1.060736011 | 0.252104572 |
| 1562738_a_at | USP3-AS1      | 1.06053969  | 0.488637897 |
| 244242_at    | RP11-195F19.9 | 1.060262921 | 0.433935132 |
| 1561320_at   | RP11-133K1.8  | 1.060179388 | 0.366662632 |
| 1561075_at   | LOC101060553  | 1.060086835 | 0.267157603 |
| 1566967_at   | SPRY4-IT1     | 1.059768285 | 0.65079305  |
| 207229_at    | KLRAP1        | 1.059679441 | 0.582859261 |
| 231061_at    | RP11-148B6.1  | 1.059668763 | 0.593019918 |
| 1556263_s_at | PWRN1         | 1.059593758 | 0.265531292 |

|              |                       |             |             |
|--------------|-----------------------|-------------|-------------|
| 1566832_at   | TOP1P2                | 1.059556278 | 0.199332983 |
| 1569832_at   | LOC100131655          | 1.059356284 | 0.355252589 |
| 1561367_a_at | LINC00540             | 1.058956511 | 0.143347314 |
| 1564626_at   | RP11-81H14.1          | 1.05892033  | 0.235453483 |
| 229628_s_at  | LOC100499484-C9ORF174 | 1.058828864 | 0.71240451  |
| 65588_at     | SNHG17                | 1.058811653 | 0.692898992 |
| 230433_at    | LOC729970             | 1.058402756 | 0.586557253 |
| 1562098_at   | RP11-135F9.4          | 1.05815953  | 0.315090621 |
| 232664_at    | LINC00954             | 1.058072953 | 0.222703276 |
| 242462_at    | LINC00665             | 1.057902372 | 0.524232994 |
| 238042_at    | RP11-417L19.5         | 1.057881489 | 0.497037125 |
| 1560954_at   | RP11-202D1.2          | 1.057834167 | 0.082913836 |
| 1558148_x_at | BAIAP2-AS1            | 1.057744409 | 0.449594509 |
| 1558459_s_at | LOC401320             | 1.057513544 | 0.577317862 |
| 233527_at    | RP11-677M14.3         | 1.057258057 | 0.174788651 |
| 235990_at    | LOC100130987          | 1.057219046 | 0.593924314 |
| 1562348_at   | LINC00664             | 1.057111739 | 0.305621178 |
| 1566558_x_at | BAIAP2-AS1            | 1.057010276 | 0.634949704 |
| 1556679_at   | RP11-567L7.3          | 1.056629658 | 0.132225704 |
| 1559026_at   | PPP1R26-AS1           | 1.05641004  | 0.326787132 |
| 1565265_at   | RP11-587D21.4         | 1.056335346 | 0.2059116   |
| 1560746_at   | NEXN-AS1              | 1.05596054  | 0.179011167 |
| 1562823_at   | RP11-24J23.2          | 1.055718134 | 0.382981889 |
| 1568687_s_at | ATP8B5P               | 1.055579445 | 0.194599471 |
| 1561352_at   | RP11-245M24.1         | 1.055519323 | 0.244958833 |
| 228004_at    | LINC00261             | 1.055488189 | 0.134007132 |
| 1553708_at   | LINC00525             | 1.055273798 | 0.258466099 |
| 241947_at    | PCED1B-AS1            | 1.055152199 | 0.374420932 |
| 219043_s_at  | PDCL3P4               | 1.055062391 | 0.383368845 |
| 1570326_at   | RP11-359E8.5          | 1.054931637 | 0.168373241 |
| 237645_at    | RP11-413B19.2         | 1.054902011 | 0.206713653 |
| 234515_at    | PCGEM1                | 1.054600274 | 0.294464608 |
| 239792_at    | UBL7-AS1              | 1.05443919  | 0.698710249 |
| 217338_at    | KRT19P2               | 1.054202614 | 0.260986816 |
| 1570623_at   | RP11-96K19.4          | 1.054162703 | 0.391506344 |
| 240284_x_at  | U47924.27             | 1.05415077  | 0.361942887 |
| 227563_at    | FAM27E3               | 1.053933136 | 0.666105661 |
| 1560161_at   | RP11-59H7.3           | 1.053757883 | 0.158082413 |
| 1563083_s_at | LINC00486             | 1.053695105 | 0.048021851 |
| 204486_at    | KCNQ1OT1              | 1.053661029 | 0.27556052  |
| 1569958_at   | RP4-694A7.4           | 1.053659163 | 0.133710765 |
| 231989_s_at  | LOC613037             | 1.053566406 | 0.693666501 |
| 1560224_at   | AHCTF1P1              | 1.053121428 | 0.517422413 |
| 1561625_at   | RP5-968D22.3          | 1.053089929 | 0.359956713 |
| 227743_at    | MYO15B                | 1.053080805 | 0.564249612 |
| 1558977_at   | LOC100130992          | 1.052783495 | 0.331863437 |
| 1557895_at   | FLJ35934              | 1.052558789 | 0.777814977 |
| 230963_at    | EMX2OS                | 1.052438594 | 0.434303939 |
| 1570289_at   | LOC646736             | 1.052373536 | 0.109007352 |
| 230267_at    | RP11-173M1.8          | 1.052366618 | 0.615215244 |

|              |               |             |             |
|--------------|---------------|-------------|-------------|
| 208045_at    | RP11-292D4.4  | 1.052262598 | 0.160066467 |
| 234262_at    | RP11-319G9.1  | 1.052162334 | 0.666857969 |
| 227406_at    | GABPB1-AS1    | 1.052089426 | 0.666438935 |
| 1562073_at   | RP11-378A12.1 | 1.052061545 | 0.479038794 |
| 1563119_at   | HP09025       | 1.052008795 | 0.258829845 |
| 1564257_at   | ACTA2-AS1     | 1.051977765 | 0.314226339 |
| 1564165_at   | LOC100630923  | 1.051654125 | 0.243973842 |
| 1561880_a_at | SIGLEC16      | 1.051611973 | 0.287584384 |
| 1557336_at   | RP11-81N13.1  | 1.051530072 | 0.444827479 |
| 243674_at    | RP11-374M1.5  | 1.051430867 | 0.349615205 |
| 234423_x_at  | LOC100996255  | 1.051342683 | 0.548598474 |
| 235077_at    | MEG3          | 1.051296247 | 0.897174003 |
| 1558310_s_at | LOC100132356  | 1.050972519 | 0.656100559 |
| 1556883_a_at | LOC440896     | 1.050860541 | 0.564875062 |
| 238944_at    | LOC100505715  | 1.050768208 | 0.832389434 |
| 1560959_a_at | RP1-39J2.1    | 1.050756314 | 0.105512865 |
| 1553493_a_at | TDH           | 1.050578957 | 0.357966222 |
| 240519_at    | RP11-141M1.1  | 1.050520919 | 0.14172018  |
| 230313_at    | RP11-403P17.3 | 1.050408554 | 0.616983991 |
| 1568894_at   | RP11-678G14.4 | 1.050298022 | 0.219994871 |
| 1563872_at   | LOC284395     | 1.050168669 | 0.294163706 |
| 1568921_at   | RP11-10C8.2   | 1.04994816  | 0.234563465 |
| 1563260_at   | LINC00587     | 1.04984863  | 0.30564154  |
| 240537_s_at  | CDIPT-AS1     | 1.049827768 | 0.42500355  |
| 231844_at    | MGC27345      | 1.049406962 | 0.471054316 |
| 1561448_at   | RP4-630C24.3  | 1.049325292 | 0.27523716  |
| 237219_at    | PHKA1-AS1     | 1.049249754 | 0.331502043 |
| 230664_at    | H2BFXP        | 1.049234952 | 0.816859366 |
| 1561741_at   | RP11-92G12.3  | 1.048750932 | 0.687077606 |
| 227709_at    | TPT1-AS1      | 1.048700363 | 0.699004771 |
| 1557211_a_at | FAM181A-AS1   | 1.0486464   | 0.261926221 |
| 210571_s_at  | CMAHP         | 1.048608931 | 0.694509978 |
| 1570375_at   | LOC100506585  | 1.048472065 | 0.433512559 |
| 236205_at    | ABCC6P1       | 1.04839422  | 0.570773926 |
| 1556884_a_at | LINC00558     | 1.048379745 | 0.123593901 |
| 1561222_at   | LINC00485     | 1.048328642 | 0.124408087 |
| 215105_at    | N4BP2L2-IT2   | 1.048202395 | 0.408921557 |
| 1566843_at   | PER4          | 1.04818739  | 0.140708483 |
| 237767_at    | FARP1-IT1     | 1.048077387 | 0.334041525 |
| 1559497_at   | RP11-597K23.2 | 1.047942287 | 0.195516498 |
| 233551_at    | LOC642776     | 1.047939208 | 0.233935223 |
| 233063_s_at  | RP1-80B9.2    | 1.047884672 | 0.665584544 |
| 236054_at    | RP11-635N19.1 | 1.047802331 | 0.507723031 |
| 214858_at    | PP14571       | 1.047782516 | 0.399941185 |
| 1558458_at   | LOC401320     | 1.047721949 | 0.644347948 |
| 239421_at    | DLGAP1-AS1    | 1.047642087 | 0.54102428  |
| 1558216_at   | AFAP1-AS1     | 1.047424871 | 0.387369704 |
| 1560238_at   | LINC00665     | 1.047330828 | 0.703334242 |
| 1560279_a_at | LOC221122     | 1.0473198   | 0.213292877 |
| 240708_at    | PEX5L-AS2     | 1.047252771 | 0.214309386 |

|              |               |             |             |
|--------------|---------------|-------------|-------------|
| 236506_at    | RP11-248J18.3 | 1.047165903 | 0.666473686 |
| 222054_at    | PPIEL         | 1.046862297 | 0.6721389   |
| 234763_at    | RP4-665N4.4   | 1.046805491 | 0.191742085 |
| 239115_at    | RP11-358L4.1  | 1.046760162 | 0.290190923 |
| 231811_at    | LOC100288778  | 1.046718719 | 0.516777204 |
| 1559501_at   | CBR3-AS1      | 1.046594263 | 0.360486027 |
| 1560432_at   | CLRN1-AS1     | 1.046511688 | 0.279536204 |
| 1570071_at   | RP11-258F1.1  | 1.046384713 | 0.307579873 |
| 1561450_at   | RP11-196O2.1  | 1.04630649  | 0.120382161 |
| 240424_s_at  | LOC441204     | 1.046231249 | 0.783250871 |
| 1556454_a_at | LOC100506274  | 1.046107146 | 0.531106653 |
| 1553468_at   | HYDIN2        | 1.045845825 | 0.284192201 |
| 235534_at    | RP11-134G8.8  | 1.04579583  | 0.81599936  |
| 224181_at    | LINC00470     | 1.04566266  | 0.318110867 |
| 235126_at    | FLVCR1-AS1    | 1.04564517  | 0.595992553 |
| 1570587_at   | MPRIP-AS1     | 1.04554146  | 0.171602528 |
| 1570388_a_at | LOC440896     | 1.045469286 | 0.467578119 |
| 238011_at    | RP11-473I1.9  | 1.045466825 | 0.629972815 |
| 1562691_at   | RP11-473L15.2 | 1.045198498 | 0.24492568  |
| 1560750_at   | LOC151121     | 1.045096623 | 0.361497523 |
| 1570049_at   | LINC00910     | 1.044996137 | 0.30046921  |
| 242994_at    | RP4-657D16.3  | 1.044963857 | 0.459900338 |
| 232131_at    | LINC00933     | 1.04490182  | 0.173937681 |
| 239764_at    | ITPR1-AS1     | 1.044753473 | 0.736785442 |
| 1554862_at   | CMAHP         | 1.044667049 | 0.200687586 |
| 1553829_at   | CYP1B1-AS1    | 1.044604793 | 0.481567098 |
| 234666_at    | RP11-685B24.1 | 1.044350162 | 0.18315861  |
| 232853_at    | RP11-552M11.8 | 1.044244416 | 0.427307803 |
| 220157_x_at  | PLEKHA8P1     | 1.044165862 | 0.614209401 |
| 1561036_at   | RP11-396C23.2 | 1.044128219 | 0.394004022 |
| 235137_at    | PCBP1-AS1     | 1.044047117 | 0.471350134 |
| 1561223_at   | RP11-677O4.2  | 1.043924649 | 0.377361007 |
| 1565852_at   | RP11-4B16.1   | 1.043882906 | 0.533943032 |
| 1557881_at   | ZNF32-AS3     | 1.043882119 | 0.246550395 |
| 1563296_at   | LINC00572     | 1.04386696  | 0.352417644 |
| 234189_at    | RP11-669C19.1 | 1.043829525 | 0.200741087 |
| 1563993_at   | RP11-770E5.1  | 1.043741781 | 0.217392608 |
| 1563145_at   | LINC00301     | 1.043536734 | 0.288187909 |
| 233506_at    | RP11-469M7.1  | 1.043521442 | 0.806359692 |
| 239162_at    | DAPK1-IT1     | 1.043519142 | 0.817919475 |
| 1557474_at   | LOC284578     | 1.043367258 | 0.627890146 |
| 241183_at    | RP11-457K10.1 | 1.043347723 | 0.227126582 |
| 215985_at    | ZNRD1-AS1     | 1.043105658 | 0.759702743 |
| 1557446_x_at | TREML3P       | 1.043033162 | 0.262730197 |
| 1558938_at   | RP11-468E2.5  | 1.042960631 | 0.538582431 |
| 241239_at    | EPN2-IT1      | 1.042881112 | 0.394226398 |
| 223896_at    | FKSG29        | 1.042800657 | 0.187569288 |
| 1562220_at   | RP11-195M16.3 | 1.042783196 | 0.325987394 |
| 1557557_at   | MATN1-AS1     | 1.042587684 | 0.556517258 |
| 232070_at    | LOC100506639  | 1.042450583 | 0.450935665 |

|              |               |             |             |
|--------------|---------------|-------------|-------------|
| 1560202_at   | CSTF3-AS1     | 1.042444123 | 0.162127628 |
| 1560950_at   | HECW1-IT1     | 1.042439646 | 0.260751026 |
| 210646_x_at  | RPL13AP5      | 1.042380743 | 0.608595537 |
| 1570423_at   | FLG-AS1       | 1.042183266 | 0.281962618 |
| 214151_s_at  | DYX1C1-CCPG1  | 1.042175787 | 0.775216065 |
| 206302_s_at  | NUDT4P1       | 1.04210202  | 0.858154263 |
| 1560673_at   | RP4-777D9.2   | 1.042066316 | 0.283888722 |
| 235617_x_at  | LOC100507537  | 1.042025393 | 0.284820254 |
| 229811_at    | RP11-157P1.4  | 1.041959507 | 0.607885162 |
| 229716_at    | RP3-340N1.5   | 1.04186672  | 0.585842154 |
| 1561691_at   | LINC00326     | 1.041750826 | 0.381753424 |
| 212868_x_at  | MAPKAPK5-AS1  | 1.041625803 | 0.317256249 |
| 243924_at    | LINC00665     | 1.041484669 | 0.728975776 |
| 232354_at    | RP11-463O12.5 | 1.041457775 | 0.749044892 |
| 213908_at    | WHAMMP3       | 1.041326275 | 0.713051684 |
| 229722_at    | LOC100270804  | 1.04123025  | 0.641494346 |
| 1557604_at   | LOC401312     | 1.040915091 | 0.286572337 |
| 224597_at    | LINC00657     | 1.040728301 | 0.631348953 |
| 241405_at    | TOB1-AS1      | 1.040715324 | 0.517491346 |
| 1553145_at   | TAPT1-AS1     | 1.040577979 | 0.79909737  |
| 1561418_at   | RP11-265N7.1  | 1.040510773 | 0.430795041 |
| 224508_at    | MGC12916      | 1.040508382 | 0.736088225 |
| 243092_at    | PAN3-AS1      | 1.040447001 | 0.764751055 |
| 1557290_at   | DPY19L2P4     | 1.040347882 | 0.551965219 |
| 1556528_at   | LINC00692     | 1.040285198 | 0.303504423 |
| 232284_at    | PSMD6-AS2     | 1.040252947 | 0.531583605 |
| 1556272_a_at | RP11-843A23.1 | 1.040079126 | 0.256414428 |
| 1561431_at   | RP11-284F21.8 | 1.040007662 | 0.466723727 |
| 1562336_at   | CASC2         | 1.039977927 | 0.45548035  |
| 224457_at    | FOXD2-AS1     | 1.039973872 | 0.506710484 |
| 236579_at    | NKX2-1-AS1    | 1.039829221 | 0.456550591 |
| 1558920_at   | SLC8A1-AS1    | 1.039726264 | 0.739838797 |
| 1559061_at   | CACNA1G-AS1   | 1.03962741  | 0.440567643 |
| 1565563_at   | RP11-159D8.2  | 1.039461329 | 0.14009255  |
| 1553435_at   | C18orf15      | 1.039395899 | 0.492295459 |
| 236626_at    | NAGPA-AS1     | 1.039389517 | 0.751720681 |
| 1570206_at   | RP11-500B12.1 | 1.03934633  | 0.349858733 |
| 228199_at    | FAHD2CP       | 1.039227839 | 0.797811672 |
| 211351_at    | KIF25-AS1     | 1.039158744 | 0.451314346 |
| 241247_at    | RP11-167H9.6  | 1.039144397 | 0.293128631 |
| 222367_at    | WHAMMP3       | 1.038870824 | 0.498855199 |
| 242305_at    | LOC645513     | 1.038825741 | 0.662111416 |
| 235445_at    | LOC100508046  | 1.038810675 | 0.234580578 |
| 1557602_at   | LINC00870     | 1.038766514 | 0.341989895 |
| 236751_at    | RP11-214K3.19 | 1.038719205 | 0.661229067 |
| 233772_at    | POU6F2-AS2    | 1.038668671 | 0.27970677  |
| 229014_at    | NR2F1-AS1     | 1.038575023 | 0.680536911 |
| 1560697_at   | TRHDE-AS1     | 1.038357769 | 0.639099587 |
| 214344_at    | LINC00950     | 1.038288028 | 0.677735743 |
| 1564207_at   | LINC00957     | 1.038204837 | 0.666626013 |

|              |                |             |             |
|--------------|----------------|-------------|-------------|
| 241943_at    | C18orf61       | 1.037964454 | 0.371428076 |
| 226382_at    | LOC283070      | 1.037957924 | 0.845853589 |
| 231586_at    | SPATA42        | 1.037921052 | 0.423135813 |
| 242649_x_at  | HMG2N2P46      | 1.037778916 | 0.467658502 |
| 1556924_at   | CFLAR-AS1      | 1.037772426 | 0.371787462 |
| 1560340_s_at | RP9P           | 1.037721703 | 0.642910216 |
| 216276_s_at  | ADAM3A         | 1.037658845 | 0.20645411  |
| 1552287_s_at | AFG3L1P        | 1.037609065 | 0.78467378  |
| 238924_at    | BMS1P5         | 1.037562044 | 0.803175363 |
| 1556103_at   | RP11-480A16.1  | 1.037553054 | 0.723039666 |
| 1569882_at   | NPHP3-AS1      | 1.037392502 | 0.343988611 |
| 231581_at    | LINC00664      | 1.037318156 | 0.437148685 |
| 220354_at    | MCF2L-AS1      | 1.037292092 | 0.596156361 |
| 220983_s_at  | NEAT1          | 1.037244303 | 0.737326138 |
| 1556820_a_at | DLEU2          | 1.037220195 | 0.809554316 |
| 1563168_at   | NRG1-IT1       | 1.037121579 | 0.386044725 |
| 236469_at    | RP11-1007O24.2 | 1.037106694 | 0.62785232  |
| 239279_at    | LOC730102      | 1.036808426 | 0.627160451 |
| 1560131_at   | LOC100506497   | 1.036769955 | 0.683097169 |
| 233507_at    | RP11-1081M5.2  | 1.03676892  | 0.388300764 |
| 238097_at    | GAS6-AS1       | 1.036574204 | 0.412254878 |
| 1561560_at   | RP11-95H11.1   | 1.036568562 | 0.468564607 |
| 230139_at    | RP11-121C2.2   | 1.03656618  | 0.731648451 |
| 1562478_at   | LINC00659      | 1.036528401 | 0.523229247 |
| 229493_at    | HOXD-AS2       | 1.036439943 | 0.673190296 |
| 1560241_at   | RP11-178L8.5   | 1.036421144 | 0.426050803 |
| 237088_at    | LINC00244      | 1.036347843 | 0.380104336 |
| 231318_at    | DNM1P46        | 1.03621248  | 0.455098987 |
| 1558144_at   | MEG3           | 1.03611273  | 0.433072576 |
| 1558147_a_at | BAIAP2-AS1     | 1.035981066 | 0.570903005 |
| 232886_at    | RP11-55K13.1   | 1.035896675 | 0.65858041  |
| 1568849_at   | LINC00165      | 1.035828932 | 0.496301768 |
| 1557380_at   | AGAP11         | 1.035817655 | 0.472996161 |
| 1556624_at   | RP11-214K3.20  | 1.035485919 | 0.38986161  |
| 1563135_at   | RP11-955H22.3  | 1.035326467 | 0.290243165 |
| 1558847_at   | LINC00565      | 1.035245658 | 0.630582663 |
| 1569659_at   | LOC100506895   | 1.035083806 | 0.33356319  |
| 212790_x_at  | RPL13AP5       | 1.035019841 | 0.686374308 |
| 243986_at    | LINC00355      | 1.034810211 | 0.422164687 |
| 215110_at    | MBL1P          | 1.034802006 | 0.493816529 |
| 1556936_at   | LOC100506834   | 1.034684033 | 0.610030685 |
| 1557791_at   | RP4-676L2.1    | 1.034630168 | 0.408179828 |
| 242012_at    | RP11-308D16.4  | 1.034610368 | 0.619370355 |
| 233926_at    | RP11-102L12.2  | 1.034446804 | 0.520392036 |
| 215825_at    | RP11-255C15.3  | 1.034355738 | 0.564357864 |
| 1558628_at   | RBFADN         | 1.034285369 | 0.567085518 |
| 239321_at    | LOC441454      | 1.034171526 | 0.539133035 |
| 239713_at    | CASC2          | 1.03407357  | 0.452958181 |
| 227035_x_at  | RP9P           | 1.033672416 | 0.676357025 |
| 1569577_x_at | RP11-462G12.1  | 1.033385919 | 0.827537744 |



|              |               |             |             |
|--------------|---------------|-------------|-------------|
| 1562965_at   | RP11-109E24.1 | 1.033362562 | 0.50155653  |
| 1555040_at   | LINC00612     | 1.033315421 | 0.461156162 |
| 243996_at    | RP11-112J3.16 | 1.03325357  | 0.841130128 |
| 1564443_at   | DLEU2         | 1.0332373   | 0.5372771   |
| 1569753_at   | RP11-64D24.4  | 1.03316508  | 0.434220494 |
| 231924_at    | LINC00958     | 1.033162356 | 0.651326723 |
| 224271_x_at  | FRMD8P1       | 1.033051167 | 0.509826445 |
| 241312_at    | LINC00911     | 1.032974816 | 0.519008072 |
| 239590_x_at  | FAM95B1       | 1.032957169 | 0.728014934 |
| 1569833_at   | RP11-387D10.3 | 1.032952616 | 0.504938856 |
| 1564338_at   | RP4-591N18.2  | 1.032916701 | 0.574702252 |
| 235403_at    | RP11-108K3.2  | 1.03288244  | 0.471538666 |
| 241904_at    | LIPE-AS1      | 1.032865826 | 0.558516579 |
| 1556879_at   | RP11-386M24.6 | 1.032782739 | 0.541582681 |
| 240100_at    | LOC100505920  | 1.032749066 | 0.471112517 |
| 1561034_at   | RP11-510C10.2 | 1.032641772 | 0.649475507 |
| 1552876_at   | LINC00334     | 1.032538749 | 0.387015982 |
| 241432_at    | SLIT2-IT1     | 1.032472374 | 0.437595025 |
| 240615_at    | PTOV1-AS1     | 1.032195231 | 0.68538348  |
| 1557607_at   | LOC284080     | 1.032136148 | 0.444394156 |
| 228779_at    | LOC146880     | 1.032034828 | 0.607367147 |
| 231028_at    | LOC100506082  | 1.031939426 | 0.654665862 |
| 243171_at    | RP11-775D22.2 | 1.031881019 | 0.529111853 |
| 1569713_at   | SEC24B-AS1    | 1.03184001  | 0.647240016 |
| 1557597_at   | LINC00624     | 1.031653273 | 0.372623114 |
| 1562689_at   | LOC151484     | 1.031640837 | 0.419054989 |
| 215428_at    | RP11-680F8.4  | 1.031551942 | 0.74215549  |
| 242854_x_at  | DLEU2         | 1.031523925 | 0.720968439 |
| 1568832_a_at | RP11-533E19.5 | 1.031362907 | 0.597454589 |
| 244164_at    | FAM223B       | 1.031362363 | 0.553721528 |
| 1554765_a_at | LINC00301     | 1.031314692 | 0.567355362 |
| 240755_at    | RP11-787B4.2  | 1.031248571 | 0.509108508 |
| 230328_at    | RRN3P1        | 1.031224854 | 0.719771895 |
| 243983_at    | RP11-120K24.5 | 1.031194767 | 0.425498023 |
| 1563229_at   | DLEU2         | 1.03117381  | 0.820117458 |
| 1561230_at   | RP11-171I2.1  | 1.031020227 | 0.346121394 |
| 225197_at    | RP11-473I1.10 | 1.031015935 | 0.782226411 |
| 238237_at    | LOC100130964  | 1.03090686  | 0.365189078 |
| 1556504_at   | RP11-732A21.2 | 1.030828183 | 0.365670827 |
| 1561468_at   | RP1-274L7.1   | 1.030710469 | 0.550886914 |
| 220846_s_at  | RP11-181G12.2 | 1.030577007 | 0.646195442 |
| 1561850_at   | LOC100133669  | 1.030472268 | 0.652475009 |
| 1564685_a_at | RP1-257A15.1  | 1.030448394 | 0.522790993 |
| 222328_x_at  | MEG3          | 1.030382056 | 0.672840569 |
| 1559140_at   | FAM87B        | 1.030354342 | 0.657116706 |
| 1570391_at   | RP11-661P17.1 | 1.030268993 | 0.35276542  |
| 1555869_a_at | LOC100507477  | 1.03024264  | 0.354977857 |
| 1556645_s_at | RP11-875O11.1 | 1.03012868  | 0.668185991 |
| 243979_at    | RP11-506N2.1  | 1.030101012 | 0.365223171 |
| 236283_x_at  | LOC646214     | 1.030080154 | 0.71375914  |

|              |               |             |             |
|--------------|---------------|-------------|-------------|
| 1556821_x_at | DLEU2         | 1.030029186 | 0.837948466 |
| 1556460_a_at | ARHGAP22-IT1  | 1.030025849 | 0.505193187 |
| 1554781_at   | MGC32805      | 1.030017623 | 0.465262697 |
| 1566253_at   | SH3GL1P2      | 1.030011706 | 0.683823299 |
| 1560842_a_at | TEX26-AS1     | 1.029927626 | 0.682481956 |
| 1564309_at   | LINC00486     | 1.029914086 | 0.535818977 |
| 1561021_at   | RP11-96H17.1  | 1.029869392 | 0.367315842 |
| 1563370_at   | RP11-672A2.6  | 1.029862175 | 0.472843478 |
| 1565150_at   | RP11-697E2.4  | 1.029825592 | 0.614616999 |
| 227389_x_at  | RP4-781K5.2   | 1.029805748 | 0.436440376 |
| 231760_at    | LINC00029     | 1.029721957 | 0.496097723 |
| 1559467_at   | RP11-81A1.6   | 1.029592811 | 0.727757936 |
| 237321_at    | LOC100506457  | 1.029550148 | 0.721361563 |
| 233113_at    | ADAMTS9-AS2   | 1.029527731 | 0.681135468 |
| 1562449_s_at | LARGE-AS1     | 1.029514971 | 0.40624629  |
| 211940_x_at  | H3F3AP4       | 1.029475123 | 0.794827199 |
| 233598_at    | C20orf187     | 1.029408925 | 0.511708792 |
| 240346_at    | RP11-834C11.8 | 1.029389128 | 0.524926257 |
| 1556749_at   | RP11-433J8.1  | 1.029338776 | 0.685949812 |
| 238413_at    | RRN3P3        | 1.029319194 | 0.689165523 |
| 206279_at    | PRKY          | 1.029311556 | 0.788963433 |
| 241256_at    | RP11-446F17.3 | 1.029116263 | 0.572795467 |
| 1566916_at   | HPYR1         | 1.029012138 | 0.430449369 |
| 1562496_at   | LOC339539     | 1.0289225   | 0.532615881 |
| 217492_s_at  | PTENP1        | 1.028896899 | 0.784002795 |
| 229815_at    | TMEM161B-AS1  | 1.028882054 | 0.883324813 |
| 1559542_a_at | RP11-863K10.2 | 1.028848858 | 0.392386613 |
| 1560081_at   | RAD51-AS1     | 1.028847211 | 0.72460918  |
| 230572_at    | WWC2-AS2      | 1.02878551  | 0.600178466 |
| 1561493_at   | RP11-1129I3.1 | 1.02867888  | 0.447448382 |
| 236832_at    | ADCY10P1      | 1.028645864 | 0.857428603 |
| 1568905_at   | RP11-86H7.1   | 1.028598028 | 0.634362743 |
| 241266_at    | RP11-186F10.2 | 1.028538106 | 0.382088191 |
| 1561699_a_at | ATP11A-AS1    | 1.028527005 | 0.513610749 |
| 222051_s_at  | RP11-219B4.3  | 1.028520225 | 0.569434808 |
| 1560760_s_at | RP1-13P20.6   | 1.028489345 | 0.491546139 |
| 233289_at    | RP4-635A23.6  | 1.028450388 | 0.823068973 |
| 244035_at    | RP11-28F1.2   | 1.028408295 | 0.717664317 |
| 1561487_at   | RP11-300A12.2 | 1.028378407 | 0.521034393 |
| 1559459_at   | LOC613266     | 1.02834664  | 0.574994115 |
| 238086_at    | LOC100129617  | 1.028333043 | 0.500520225 |
| 240474_x_at  | RP11-313C4.1  | 1.028278152 | 0.440178078 |
| 228290_at    | PLK1S1        | 1.028204304 | 0.806361027 |
| 1569935_at   | RP11-214K3.24 | 1.02813478  | 0.599619768 |
| 1556333_at   | RP11-408H20.3 | 1.028130287 | 0.631297555 |
| 214107_x_at  | LOC440434     | 1.028104183 | 0.775995255 |
| 1562520_at   | RP11-168K9.2  | 1.027900059 | 0.508943952 |
| 1569750_at   | RP11-385H1.1  | 1.027887687 | 0.683592419 |
| 243703_x_at  | LIPE-AS1      | 1.027810653 | 0.471582977 |
| 1559145_at   | RNF144A-AS1   | 1.027809124 | 0.684855094 |

|              |               |             |             |
|--------------|---------------|-------------|-------------|
| 237182_at    | MRPL45P2      | 1.027795011 | 0.419402184 |
| 1557823_s_at | LOC401134     | 1.027690303 | 0.389586661 |
| 239106_at    | CA5BP1        | 1.027662758 | 0.795142522 |
| 1566277_at   | OR5E1P        | 1.027537374 | 0.550673096 |
| 242207_at    | LOC100128361  | 1.027517633 | 0.674191063 |
| 230294_at    | RP5-1125A11.1 | 1.027452916 | 0.775113918 |
| 1563048_at   | RP5-1039K5.16 | 1.027325719 | 0.561032165 |
| 217588_at    | CATSPER2P1    | 1.027235706 | 0.736385877 |
| 1553607_at   | GRIK1-AS2     | 1.027147751 | 0.325029049 |
| 233740_at    | RP11-454F8.4  | 1.027001403 | 0.629913751 |
| 217039_x_at  | ELK2AP        | 1.026996702 | 0.595242107 |
| 244119_at    | LINC00551     | 1.026996044 | 0.354492501 |
| 223733_s_at  | PPP4R1L       | 1.026964185 | 0.699658903 |
| 1560872_at   | RP11-513N24.1 | 1.026955075 | 0.593961345 |
| 231638_at    | PRSS30P       | 1.0268996   | 0.71355336  |
| 234029_at    | PCDHGB8P      | 1.026894339 | 0.526956609 |
| 1559655_at   | MAMDC2-AS1    | 1.026783031 | 0.443298121 |
| 1556722_a_at | C20orf203     | 1.026756342 | 0.646394227 |
| 1561098_at   | LINC00616     | 1.026711843 | 0.493751053 |
| 200716_x_at  | RPL13AP5      | 1.02670637  | 0.772894311 |
| 1570015_at   | CHIAP2        | 1.026703199 | 0.513819638 |
| 1562353_x_at | RP11-373E16.3 | 1.02667949  | 0.461512537 |
| 1557753_at   | RP11-519M16.1 | 1.02649274  | 0.503623612 |
| 233583_at    | RP11-560A15.4 | 1.026401601 | 0.535966738 |
| 1556256_a_at | RP11-61A14.1  | 1.026391529 | 0.499517643 |
| 242510_at    | RP3-476K8.3   | 1.02638571  | 0.584306426 |
| 1562822_at   | RP1-60N8.1    | 1.026375812 | 0.475863171 |
| 1559766_at   | ALDH1L1-AS2   | 1.026329299 | 0.860185723 |
| 243961_at    | LOC100505622  | 1.026308151 | 0.481759365 |
| 1554978_at   | ERICH1-AS1    | 1.026295315 | 0.550931835 |
| 233591_at    | RP11-476D10.1 | 1.026246699 | 0.342681474 |
| 1561273_at   | HOXC-AS3      | 1.026179375 | 0.575666785 |
| 1556684_at   | RPPH1         | 1.026171895 | 0.582401472 |
| 1560851_at   | LINC00619     | 1.026153108 | 0.59179988  |
| 1559668_s_at | RP11-83N9.5   | 1.026040489 | 0.592377418 |
| 1562869_at   | RP11-111I12.1 | 1.026027367 | 0.623596473 |
| 232016_at    | RP11-540B6.6  | 1.025811637 | 0.462695596 |
| 1570008_at   | GNN           | 1.025758561 | 0.543749979 |
| 244468_at    | PDZK1P1       | 1.025715226 | 0.487144207 |
| 1557483_at   | LOC284788     | 1.025694226 | 0.547657529 |
| 210909_x_at  | LPAL2         | 1.025691772 | 0.653557891 |
| 1569293_x_at | CROCCP2       | 1.025647686 | 0.454719756 |
| 238148_s_at  | ZNF818P       | 1.025589867 | 0.820599604 |
| 237015_at    | RP11-679B19.1 | 1.025557433 | 0.900434263 |
| 1562960_at   | KCNQ1-AS1     | 1.025515884 | 0.586916515 |
| 1569839_s_at | LRRC37A5P     | 1.025503521 | 0.590038543 |
| 232189_at    | RP11-108P20.1 | 1.02542319  | 0.499547457 |
| 1556913_a_at | RP11-837J7.3  | 1.025412953 | 0.620208876 |
| 230910_s_at  | LOC100288181  | 1.025391592 | 0.628782519 |
| 1560982_at   | RP11-452L6.1  | 1.02534551  | 0.754007914 |

|              |               |             |             |
|--------------|---------------|-------------|-------------|
| 1562514_at   | RP11-201A3.1  | 1.025315402 | 0.454130271 |
| 1553482_at   | C15orf32      | 1.025309724 | 0.472034181 |
| 214984_at    | SLC7A5P1      | 1.025306093 | 0.730511413 |
| 244608_at    | RP11-384J4.1  | 1.025304683 | 0.739831843 |
| 230940_at    | LOC100288123  | 1.025280544 | 0.540144027 |
| 1562032_at   | RP4-539M6.14  | 1.02519602  | 0.581334944 |
| 225995_x_at  | WASH2P        | 1.024852609 | 0.770502453 |
| 1559865_at   | RP1-149C7.1   | 1.024779257 | 0.453573395 |
| 233840_at    | LOC100130950  | 1.024591193 | 0.667537721 |
| 239356_at    | DOCK9-AS2     | 1.024415185 | 0.607285307 |
| 235185_s_at  | LOC388692     | 1.024404167 | 0.616480234 |
| 1561335_at   | LOC440602     | 1.024362028 | 0.606173624 |
| 1568633_a_at | RP11-49I11.1  | 1.024312442 | 0.573665597 |
| 1559374_at   | RP11-194N12.2 | 1.024167713 | 0.685999281 |
| 1561683_at   | RP11-410C4.5  | 1.024135401 | 0.509028743 |
| 1560848_at   | RP11-308D13.3 | 1.0240795   | 0.621758437 |
| 1562480_at   | RP11-475A13.2 | 1.024041579 | 0.316172881 |
| 1561314_at   | RP11-752D24.2 | 1.024037586 | 0.592776095 |
| 1560995_s_at | RP11-867G2.4  | 1.02402148  | 0.600530877 |
| 1569674_at   | LINC00630     | 1.023741361 | 0.444295002 |
| 1563157_at   | FOXP1-AS1     | 1.023593936 | 0.589912419 |
| 1562469_at   | LINC00340     | 1.023491025 | 0.521141115 |
| 1563038_at   | RP11-550P17.5 | 1.023405781 | 0.542018193 |
| 1560383_at   | RP11-752D24.2 | 1.023335155 | 0.520945881 |
| 1555205_at   | RP11-498C9.17 | 1.023284964 | 0.620939432 |
| 1562943_at   | MACROD2-AS1   | 1.023234159 | 0.600988522 |
| 243440_at    | SIX3-AS1      | 1.023199101 | 0.687484665 |
| 243225_at    | FGF14-AS2     | 1.023187519 | 0.862895053 |
| 237605_at    | RP5-1027O15.1 | 1.023158977 | 0.586718533 |
| 237034_at    | RP11-185E8.2  | 1.023152251 | 0.892669479 |
| 1553311_at   | C20orf197     | 1.023092607 | 0.740294192 |
| 1562839_at   | LINC00894     | 1.022974486 | 0.782495127 |
| 1570291_at   | CLDN10-AS1    | 1.022880326 | 0.61683699  |
| 1563040_s_at | LARGE-AS1     | 1.022810102 | 0.431566407 |
| 208273_at    | ZNF670-ZNF695 | 1.022768221 | 0.661211536 |
| 1560255_at   | CELF2-AS1     | 1.022636769 | 0.639913694 |
| 1555085_at   | RP11-222A5.1  | 1.02257469  | 0.604086001 |
| 235712_at    | GAS5-AS1      | 1.022529274 | 0.729974479 |
| 216902_s_at  | RRN3P1        | 1.022508936 | 0.87928874  |
| 222669_s_at  | SBDSP1        | 1.0224636   | 0.796512862 |
| 1568899_at   | RP13-516M14.4 | 1.022438795 | 0.537117336 |
| 229171_at    | RP11-566K11.5 | 1.022409273 | 0.589702838 |
| 1564300_at   | IQCF5-AS1     | 1.022382678 | 0.596503585 |
| 1568636_a_at | LINC00354     | 1.022316532 | 0.567350502 |
| 1558903_at   | LINC00907     | 1.022268856 | 0.640703988 |
| 216548_x_at  | HMGB3P1       | 1.022245692 | 0.83154468  |
| 217499_x_at  | OR7E37P       | 1.022231733 | 0.818784451 |
| 225920_at    | LOC148413     | 1.022203102 | 0.748188461 |
| 215410_at    | PMS2P1        | 1.022099484 | 0.674176197 |
| 1563927_a_at | LOC401463     | 1.022088318 | 0.569429951 |

|              |                 |             |             |
|--------------|-----------------|-------------|-------------|
| 1561347_a_at | RP11-433M22.2   | 1.022003749 | 0.557815795 |
| 235397_at    | LINC00174       | 1.021897803 | 0.709966896 |
| 243200_at    | RP11-369C8.1    | 1.021889892 | 0.514792906 |
| 213828_x_at  | H3F3AP4         | 1.021874244 | 0.830478984 |
| 1561909_at   | RP11-398G24.2   | 1.021737268 | 0.804854792 |
| 1562827_at   | DIO2-AS1        | 1.021710634 | 0.676046396 |
| 1557889_at   | RP11-1110F20.1  | 1.021706092 | 0.893461712 |
| 243432_at    | CHL1-AS2        | 1.021705322 | 0.839794562 |
| 231347_at    | LOC100996694    | 1.021655519 | 0.638138832 |
| 239762_at    | LOC286437       | 1.021621786 | 0.858543953 |
| 242382_at    | LOC100506207    | 1.021604468 | 0.628699293 |
| 227106_at    | TMEM198B        | 1.021522613 | 0.818037206 |
| 1555456_at   | RP11-185J20.1   | 1.021515167 | 0.618380253 |
| 1567686_at   | CECR9           | 1.021484017 | 0.550211402 |
| 1559621_at   | RP11-584P21.2   | 1.021389513 | 0.590329868 |
| 235362_at    | LOC729970       | 1.021331146 | 0.85600614  |
| 1564158_a_at | VAC14-AS1       | 1.021249506 | 0.905187937 |
| 1556387_at   | LOC100507389    | 1.021196763 | 0.533484162 |
| 1562034_at   | LINC00163       | 1.021110229 | 0.537788606 |
| 1554716_s_at | LINC00593       | 1.020998452 | 0.680825439 |
| 1564610_at   | RP11-1109M24.16 | 1.020943472 | 0.520010392 |
| 220752_at    | LOC51145        | 1.020926415 | 0.697396837 |
| 231141_at    | RP11-217B1.2    | 1.02091282  | 0.576399715 |
| 1557564_at   | ALKBH3-AS1      | 1.020873843 | 0.631754098 |
| 239791_at    | HOXB-AS3        | 1.020869016 | 0.725897894 |
| 240276_at    | RP11-108P20.4   | 1.020855057 | 0.67798753  |
| 1553934_at   | LINC00305       | 1.020828733 | 0.558960776 |
| 1553204_at   | C20orf166-AS1   | 1.020739943 | 0.738888915 |
| 244823_at    | LOC100129034    | 1.020361873 | 0.704780037 |
| 215658_at    | LINC00675       | 1.020342097 | 0.631578623 |
| 1555681_at   | RP11-542M13.1   | 1.020339175 | 0.651673521 |
| 241418_at    | LOC344887       | 1.0203243   | 0.746240026 |
| 231226_at    | MED14-AS1       | 1.02027958  | 0.654638624 |
| 1561442_at   | LOC283585       | 1.020063714 | 0.650537517 |
| 243909_x_at  | GUSBP4          | 1.019935645 | 0.76706944  |
| 1562051_at   | LOC729296       | 1.01986182  | 0.800772224 |
| 243892_at    | RP11-171N4.2    | 1.019720619 | 0.520287498 |
| 234529_at    | PCGEM1          | 1.019644006 | 0.595810573 |
| 1569911_at   | RP11-89M16.1    | 1.019614526 | 0.683694725 |
| 224132_at    | RP11-45M22.5    | 1.019574446 | 0.719578993 |
| 1557610_at   | PITRM1-AS1      | 1.019486052 | 0.713467812 |
| 1561608_at   | RP11-472K22.1   | 1.01943486  | 0.554138747 |
| 233820_at    | RP11-399O19.8   | 1.019377717 | 0.7699581   |
| 1561401_at   | LOC285627       | 1.01932845  | 0.62754741  |
| 243905_at    | LINC00944       | 1.019316431 | 0.642827145 |
| 1553457_at   | LINC00269       | 1.019315529 | 0.560540215 |
| 1559141_s_at | FAM87B          | 1.01928673  | 0.861973805 |
| 1561676_at   | PRICKLE2-AS3    | 1.019269893 | 0.645787566 |
| 232096_x_at  | FOXP1-IT1       | 1.019246932 | 0.819444159 |
| 1560570_a_at | RP11-111J6.2    | 1.019229827 | 0.78434499  |

|              |                |             |             |
|--------------|----------------|-------------|-------------|
| 232346_at    | LOC388692      | 1.019208114 | 0.840548022 |
| 1562341_at   | RP11-475O6.1   | 1.019101613 | 0.60670821  |
| 1557149_at   | RP11-432J24.5  | 1.019088848 | 0.690493906 |
| 1553067_a_at | GNRHR2         | 1.019044202 | 0.62627269  |
| 233552_at    | RP11-573N10.1  | 1.018970652 | 0.658871547 |
| 1562865_at   | RP11-642A1.1   | 1.018936662 | 0.611490691 |
| 1556625_a_at | RP11-214K3.20  | 1.018925588 | 0.582422924 |
| 1566251_at   | SH3GL1P1       | 1.018908085 | 0.568745372 |
| 1556617_a_at | LINC00901      | 1.018875901 | 0.559671311 |
| 1561078_at   | RP11-403N16.3  | 1.018800579 | 0.6342729   |
| 236394_at    | A2MP1          | 1.018799025 | 0.698819754 |
| 236142_at    | RP5-994D16.3   | 1.018781428 | 0.810333007 |
| 1557386_at   | LOC100507600   | 1.018762527 | 0.681585108 |
| 230917_at    | RP11-510J16.3  | 1.018662826 | 0.872211712 |
| 1560548_at   | RP11-501G7.1   | 1.018595002 | 0.590464272 |
| 1562413_at   | LINC00167      | 1.018569389 | 0.732985183 |
| 237745_at    | TSC22D1-AS1    | 1.018439552 | 0.917691942 |
| 227290_at    | RP11-18F14.2   | 1.018305261 | 0.927596484 |
| 1559079_at   | LINC00567      | 1.018295326 | 0.680408136 |
| 1557486_at   | ANKRD44-IT1    | 1.018138924 | 0.769308853 |
| 236585_at    | RP5-894A10.6   | 1.018031979 | 0.825904511 |
| 1566833_x_at | TOP1P2         | 1.018030521 | 0.641469931 |
| 243729_at    | RP11-747H7.3   | 1.017835912 | 0.898539044 |
| 1570315_at   | HCCAT5         | 1.017712571 | 0.681150004 |
| 1561491_at   | LOC283214      | 1.017708047 | 0.688378186 |
| 1568888_at   | LOC100507283   | 1.017673351 | 0.645103185 |
| 217003_s_at  | ADAM5          | 1.017640612 | 0.604608102 |
| 231096_at    | PCAT4          | 1.01761786  | 0.717484689 |
| 239887_at    | RP11-283G6.4   | 1.01753577  | 0.758127858 |
| 1562121_at   | CHL1-AS1       | 1.017455736 | 0.679424999 |
| 1562623_at   | LOC146513      | 1.017381247 | 0.658672845 |
| 220152_at    | C10orf95       | 1.017317686 | 0.687457797 |
| 1560940_at   | SACS-AS1       | 1.017274592 | 0.623442314 |
| 235673_at    | RP11-95D17.1   | 1.017144153 | 0.747569206 |
| 240986_at    | RP11-17G12.3   | 1.017114707 | 0.707836632 |
| 235480_at    | LOC100506472   | 1.017108366 | 0.741513226 |
| 236451_at    | LOC100996579   | 1.016897518 | 0.632260181 |
| 1561979_at   | LOC100505635   | 1.016889282 | 0.696726185 |
| 1563581_at   | RPL34-AS1      | 1.016879954 | 0.693933768 |
| 233965_at    | TBX5-AS1       | 1.016863904 | 0.706655799 |
| 1561239_at   | RP11-401I19.2  | 1.016725225 | 0.726661732 |
| 1555822_at   | FAM138B        | 1.016677082 | 0.682675208 |
| 240192_at    | GATA3-AS1      | 1.016617701 | 0.610155527 |
| 1561606_at   | RP11-579O24.3  | 1.016602688 | 0.682584252 |
| 215683_at    | RBFADN         | 1.016541282 | 0.792014959 |
| 230845_at    | HOXB-AS5       | 1.016472182 | 0.760037727 |
| 221511_x_at  | DYX1C1-CCPG1   | 1.01641199  | 0.910789873 |
| 233746_x_at  | SERF2-C15ORF63 | 1.016411607 | 0.838190967 |
| 1560402_at   | GAS5           | 1.016382373 | 0.804896288 |
| 1554996_at   | ZNF733P        | 1.016338573 | 0.676884404 |

|              |               |             |             |
|--------------|---------------|-------------|-------------|
| 227941_at    | LOC339803     | 1.016318051 | 0.901042614 |
| 1556445_at   | RP11-90P13.1  | 1.016302565 | 0.731092047 |
| 223977_s_at  | LINC00470     | 1.016247876 | 0.734564126 |
| 1563053_at   | LOC729083     | 1.016208828 | 0.650076312 |
| 215679_at    | RP11-6O2.2    | 1.016205804 | 0.636127491 |
| 1559254_at   | LINC00162     | 1.016170069 | 0.623433741 |
| 1553818_x_at | POM121L10P    | 1.016117569 | 0.739384231 |
| 230096_at    | SAPCD1-AS1    | 1.016030681 | 0.785286334 |
| 239936_at    | DLEU2         | 1.0160125   | 0.895093318 |
| 1561707_at   | LINC00895     | 1.015985996 | 0.701331473 |
| 216469_at    | LOC441666     | 1.015971509 | 0.657390821 |
| 242354_at    | RP11-532F12.5 | 1.015923899 | 0.768672499 |
| 215738_at    | LINC00563     | 1.015896593 | 0.732592194 |
| 1561650_s_at | LOC285692     | 1.015802722 | 0.675099767 |
| 231521_at    | PMS2P4        | 1.015766714 | 0.795049036 |
| 207490_at    | TUBA4B        | 1.01574123  | 0.821218365 |
| 213703_at    | LINC00342     | 1.015701034 | 0.921344454 |
| 237224_at    | LINC00853     | 1.015695008 | 0.802959747 |
| 230641_at    | LOC100505938  | 1.015670405 | 0.884478857 |
| 1562617_at   | LOC340074     | 1.015627324 | 0.691242969 |
| 1562932_at   | RP11-318G8.4  | 1.01562214  | 0.678455949 |
| 232251_at    | NUDT16P1      | 1.015622006 | 0.755584202 |
| 1562223_at   | LOC642426     | 1.015526228 | 0.61290799  |
| 215876_at    | RP11-217B7.2  | 1.01548935  | 0.745385652 |
| 239718_at    | LOC654342     | 1.015433882 | 0.846760338 |
| 242812_at    | HCG18         | 1.015424682 | 0.862591093 |
| 1564533_at   | LOC643711     | 1.015332977 | 0.623590405 |
| 227724_at    | NUTM2A-AS1    | 1.015317792 | 0.884186529 |
| 1557565_a_at | ALKBH3-AS1    | 1.015207931 | 0.737654863 |
| 1559352_a_at | MAFG-AS1      | 1.015192538 | 0.753704738 |
| 240184_at    | SYNPR-AS1     | 1.015126513 | 0.72440965  |
| 214152_at    | DYX1C1-CCPG1  | 1.015123396 | 0.916211131 |
| 1555221_at   | RP11-6N17.1   | 1.015085175 | 0.619097359 |
| 244325_at    | LINC00690     | 1.01495083  | 0.755614579 |
| 1552952_at   | RBMV2FP       | 1.014941769 | 0.690521338 |
| 1561967_at   | FLNB-AS1      | 1.014781753 | 0.65696414  |
| 1561529_at   | RP11-352B15.2 | 1.014718507 | 0.748246939 |
| 237630_s_at  | FAM86B3P      | 1.014638657 | 0.788038969 |
| 231458_at    | LINC00658     | 1.014617979 | 0.784433837 |
| 238195_at    | RP11-506E9.3  | 1.014602538 | 0.750525174 |
| 1563753_at   | LOC149684     | 1.014552813 | 0.691221465 |
| 239982_at    | RP4-612B15.3  | 1.014494951 | 0.839800245 |
| 221183_at    | LOC100507388  | 1.014420812 | 0.767984621 |
| 215944_at    | RP11-170N11.1 | 1.014324307 | 0.743810946 |
| 240893_at    | RP11-502N13.2 | 1.014205211 | 0.720193674 |
| 208534_s_at  | RASA4CP       | 1.014187484 | 0.930846332 |
| 228632_at    | MEG9          | 1.01412926  | 0.885975293 |
| 224143_at    | TTY8B         | 1.01412458  | 0.776316531 |
| 1557618_at   | LOC285768     | 1.014109567 | 0.736922368 |
| 223971_at    | OR2A9P        | 1.013992196 | 0.819567536 |

|              |               |             |             |
|--------------|---------------|-------------|-------------|
| 243212_at    | RP11-225H22.4 | 1.013967749 | 0.742110135 |
| 217194_at    | RP4-765C7.1   | 1.013944679 | 0.594989394 |
| 1561353_at   | RP11-624J12.1 | 1.013906884 | 0.731840467 |
| 240669_at    | RP11-60A24.3  | 1.013843635 | 0.757250459 |
| 1562893_at   | RP11-65D17.1  | 1.013809854 | 0.664982037 |
| 225786_at    | HNRNPU-AS1    | 1.013773688 | 0.932232215 |
| 1561386_at   | RP11-863K10.7 | 1.013649464 | 0.745911166 |
| 242666_at    | RP3-400N23.6  | 1.013632128 | 0.825908381 |
| 1566082_at   | RP11-452K12.7 | 1.013548832 | 0.784990834 |
| 1559646_a_at | LINC00184     | 1.013506757 | 0.798252454 |
| 1561331_at   | ERVMER61-1    | 1.013466019 | 0.657547752 |
| 238874_at    | LOC100506860  | 1.013458498 | 0.781372346 |
| 1557783_at   | MAP3K14-AS1   | 1.01335403  | 0.809201802 |
| 220589_s_at  | LOC100507424  | 1.013215639 | 0.843591087 |
| 1561375_at   | RP11-806L2.2  | 1.013215314 | 0.734317149 |
| 224185_at    | RP11-199F11.2 | 1.013212356 | 0.918879306 |
| 224423_x_at  | PMCHL2        | 1.013143502 | 0.775170587 |
| 234234_at    | RP5-1120P11.1 | 1.013099288 | 0.762524182 |
| 229604_at    | CMAHP         | 1.013088048 | 0.889894596 |
| 1562742_at   | RP4-601K24.1  | 1.013080644 | 0.807833498 |
| 1559066_at   | RP11-4O1.2    | 1.013072802 | 0.767974415 |
| 207963_at    | KIF25-AS1     | 1.013065646 | 0.850140522 |
| 1569270_at   | LOC100134368  | 1.013052289 | 0.770883694 |
| 1562558_at   | LOC440704     | 1.013004358 | 0.723286892 |
| 1557167_at   | HCG11         | 1.012942444 | 0.931811932 |
| 1557606_at   | RP11-588G21.2 | 1.012940955 | 0.678017007 |
| 224443_at    | LINC00467     | 1.012934106 | 0.936166091 |
| 238247_at    | RP11-761I4.3  | 1.012827383 | 0.734560925 |
| 235317_at    | LOC284454     | 1.012719298 | 0.818816269 |
| 211942_x_at  | RPL13AP5      | 1.01260554  | 0.900061233 |
| 1566935_at   | TYRO3P        | 1.012532017 | 0.771081962 |
| 237635_at    | LOC100128164  | 1.012506785 | 0.748750686 |
| 232686_at    | SIGLEC17P     | 1.012444959 | 0.82657282  |
| 232965_at    | LOC400684     | 1.012442918 | 0.794107226 |
| 220855_at    | CLTC-IT1      | 1.012350643 | 0.92457283  |
| 1563324_at   | LOC100129603  | 1.012290752 | 0.755032314 |
| 1561553_at   | RP11-418J17.1 | 1.012252085 | 0.682415229 |
| 230432_at    | LOC100422737  | 1.012241846 | 0.797371664 |
| 206097_at    | SLC22A18AS    | 1.012132699 | 0.82135305  |
| 1563369_at   | LINC00173     | 1.012126484 | 0.793470368 |
| 59375_at     | MYO15B        | 1.011931345 | 0.888385364 |
| 222184_at    | LINC00965     | 1.011894293 | 0.945255483 |
| 1561384_a_at | LOC284661     | 1.011870183 | 0.75852837  |
| 1561069_at   | RP11-298H24.1 | 1.011838545 | 0.680993584 |
| 244553_at    | HOTTIP        | 1.011833552 | 0.713190605 |
| 231421_at    | LINC00710     | 1.01173026  | 0.746100412 |
| 1564017_at   | COL18A1-AS1   | 1.011705525 | 0.730260553 |
| 1564777_at   | HYALP1        | 1.011680734 | 0.730758404 |
| 1559777_at   | LOC731424     | 1.011625817 | 0.813535434 |
| 1561287_at   | LINC00561     | 1.011575953 | 0.756162598 |



|              |               |             |             |
|--------------|---------------|-------------|-------------|
| 207631_at    | NBR2          | 1.011517727 | 0.871933108 |
| 233162_at    | RP11-333A23.4 | 1.011493588 | 0.759362425 |
| 237473_at    | PPIEL         | 1.011456742 | 0.765961049 |
| 220577_at    | GVINP1        | 1.011396903 | 0.881121243 |
| 1570316_at   | RP11-749H17.2 | 1.011361699 | 0.759631238 |
| 237651_x_at  | LINC00518     | 1.01125758  | 0.744451178 |
| 220852_at    | FOXN3-AS2     | 1.011215714 | 0.792455192 |
| 238216_at    | LOC100506258  | 1.011205315 | 0.805190163 |
| 234166_at    | RP13-487P22.1 | 1.011198229 | 0.794523246 |
| 242267_x_at  | RP5-1154L15.2 | 1.011166746 | 0.798909512 |
| 1558804_at   | RP11-467D6.1  | 1.011113267 | 0.776196265 |
| 210794_s_at  | MEG3          | 1.011091156 | 0.956932722 |
| 1555890_at   | OR2A9P        | 1.011073635 | 0.879603824 |
| 1562509_at   | RP11-402L6.1  | 1.011065884 | 0.865851148 |
| 1554413_s_at | SNX29P2       | 1.011007059 | 0.859367033 |
| 1562352_at   | RP11-373E16.3 | 1.010994453 | 0.73090631  |
| 1560978_at   | RP11-534L20.5 | 1.010991216 | 0.78381698  |
| 240068_at    | LINC00323     | 1.010981713 | 0.844148305 |
| 236176_at    | RP4-794H19.1  | 1.010949494 | 0.852142705 |
| 1561084_at   | RP13-539F13.3 | 1.010930662 | 0.81509677  |
| 235284_s_at  | LOC388692     | 1.010658559 | 0.731469398 |
| 1560496_at   | RP11-554A11.6 | 1.010652848 | 0.823944265 |
| 1564790_at   | ST7-AS2       | 1.01061333  | 0.727737296 |
| 1562895_at   | RP11-154D17.1 | 1.010601319 | 0.805240722 |
| 229156_s_at  | PRKAG2-AS1    | 1.010589079 | 0.936185804 |
| 214570_x_at  | POM121L1P     | 1.010527408 | 0.776925628 |
| 236881_at    | RP1-135L22.1  | 1.010505766 | 0.830249458 |
| 1562313_at   | BCORP1        | 1.010375815 | 0.760018698 |
| 244681_at    | NUP210P1      | 1.010328372 | 0.79046849  |
| 1568869_at   | RP11-102M11.2 | 1.010306126 | 0.776705152 |
| 236639_at    | RP11-168O10.6 | 1.010267325 | 0.823688647 |
| 1559208_at   | ST7-OT4       | 1.010259713 | 0.774443745 |
| 217393_x_at  | UBE2NL        | 1.010234577 | 0.811316675 |
| 1561281_a_at | LEMD1-AS1     | 1.010210449 | 0.853517566 |
| 231330_at    | LINC00445     | 1.010069748 | 0.825904981 |
| 1559813_at   | RP11-454K7.3  | 1.010014329 | 0.836522958 |
| 1565556_at   | LINC00628     | 1.010008831 | 0.829256381 |
| 1561868_at   | RP4-584D14.7  | 1.010007309 | 0.800206657 |
| 1562190_at   | RP11-360P21.2 | 1.009997531 | 0.712282632 |
| 229013_at    | LOC145783     | 1.009966884 | 0.877525087 |
| 1564050_at   | LOC100131347  | 1.00981159  | 0.879281693 |
| 1564909_at   | RP11-13E5.2   | 1.0098079   | 0.691163909 |
| 1557591_at   | LOC283038     | 1.009733914 | 0.786131597 |
| 1552972_at   | LOC100507431  | 1.009689392 | 0.743842012 |
| 220810_at    | CLCA3P        | 1.009617887 | 0.683708805 |
| 1570046_at   | RP11-489G11.3 | 1.009592633 | 0.775783465 |
| 239685_at    | LINC00900     | 1.009480025 | 0.845238776 |
| 1557871_at   | LOC253573     | 1.00945565  | 0.792485841 |
| 217488_x_at  | PMS2P3        | 1.009432054 | 0.844685293 |
| 224421_x_at  | PMCHL1        | 1.009293058 | 0.828665347 |

|              |               |             |             |
|--------------|---------------|-------------|-------------|
| 1561311_at   | RP11-174G17.2 | 1.009253384 | 0.863930609 |
| 208245_at    | RAB9BP1       | 1.009044374 | 0.850437118 |
| 1556511_a_at | RP4-668G5.1   | 1.00898789  | 0.927602541 |
| 1556533_at   | LINC00868     | 1.008977874 | 0.81522877  |
| 243412_at    | RP11-1137G4.3 | 1.008918867 | 0.810501328 |
| 242835_s_at  | LOC728730     | 1.008890742 | 0.906629709 |
| 230256_at    | RUSC1-AS1     | 1.008772455 | 0.955756809 |
| 1553592_x_at | BCRP3         | 1.008744486 | 0.865583353 |
| 237115_at    | RP11-135A1.2  | 1.008660547 | 0.901511084 |
| 1569765_at   | RP11-492E3.2  | 1.008616908 | 0.85038898  |
| 233661_at    | LINC00557     | 1.008520746 | 0.841953607 |
| 244589_at    | RP11-298H24.1 | 1.008514192 | 0.853605014 |
| 1556734_at   | LMO7-AS1      | 1.00840556  | 0.814135764 |
| 1558786_at   | RP11-797A18.4 | 1.008402198 | 0.940479838 |
| 1559656_a_at | MAMDC2-AS1    | 1.008364003 | 0.886197191 |
| 231427_at    | LOC284648     | 1.008255976 | 0.894766132 |
| 1570490_at   | RP11-646E18.4 | 1.00823915  | 0.815736952 |
| 228440_at    | RP11-164P12.4 | 1.008197561 | 0.845416628 |
| 231454_at    | PLAC4         | 1.008128212 | 0.893339528 |
| 1569838_at   | RP11-386I8.6  | 1.00809973  | 0.836267867 |
| 1561197_at   | LOC442028     | 1.008090673 | 0.866349142 |
| 1556082_a_at | RP11-16P6.1   | 1.008065837 | 0.953617686 |
| 243687_at    | LINC00881     | 1.008062229 | 0.878784932 |
| 1562733_at   | LINC00092     | 1.00805247  | 0.90435927  |
| 236669_at    | SDCBP2-AS1    | 1.008031869 | 0.950548905 |
| 233963_at    | H2BFXP        | 1.008002174 | 0.947019689 |
| 243794_at    | RP11-474D1.2  | 1.007978005 | 0.86165762  |
| 1569987_at   | DLEU7-AS1     | 1.00797229  | 0.884996576 |
| 240573_at    | LOC374443     | 1.007922264 | 0.912548285 |
| 1563371_at   | RP11-10A14.7  | 1.007770872 | 0.796766228 |
| 217323_at    | HLA-DRB6      | 1.007763564 | 0.831117664 |
| 1561301_at   | MAGI1-IT1     | 1.007615346 | 0.871901472 |
| 234712_at    | LINC00470     | 1.00759836  | 0.890641469 |
| 1559540_at   | LOC100506526  | 1.007585948 | 0.876755239 |
| 244600_at    | LOC100996583  | 1.007479523 | 0.842187187 |
| 1563235_at   | RP11-400N13.1 | 1.007473432 | 0.880378312 |
| 240441_at    | FAM99B        | 1.007464873 | 0.861192347 |
| 220506_at    | GUCY1B2       | 1.007443601 | 0.917879647 |
| 239760_at    | RP11-257O5.2  | 1.0073966   | 0.949364866 |
| 1562046_at   | RP5-952N6.1   | 1.007336565 | 0.850141971 |
| 231356_at    | RP11-862L9.3  | 1.007211062 | 0.806737558 |
| 1561328_at   | RP11-501J20.2 | 1.007154092 | 0.831936244 |
| 244270_at    | RP11-973N13.4 | 1.007153656 | 0.924757798 |
| 1553898_a_at | DKFZp434L192  | 1.007097259 | 0.825782743 |
| 1561682_at   | TTL7-IT1      | 1.007080149 | 0.896283688 |
| 1559017_at   | LOC100507351  | 1.007055281 | 0.889948366 |
| 224238_at    | RP11-264L1.2  | 1.007008449 | 0.878708872 |
| 235941_s_at  | FAM224A       | 1.00697188  | 0.865340194 |
| 236871_s_at  | IQCF4         | 1.006965621 | 0.873571053 |
| 1564485_at   | LINC00887     | 1.006951207 | 0.849053809 |

|              |                |             |             |
|--------------|----------------|-------------|-------------|
| 1557338_x_at | RP11-81N13.1   | 1.006904835 | 0.926394344 |
| 1569294_at   | RP5-915N17.11  | 1.006852055 | 0.885274144 |
| 231051_at    | LINC00948      | 1.006826245 | 0.884110491 |
| 1569486_at   | RP11-760D2.5   | 1.0068007   | 0.864812949 |
| 237845_at    | RP11-575L7.4   | 1.006733457 | 0.878296393 |
| 231557_at    | RP11-597D13.8  | 1.006692196 | 0.933122107 |
| 1563143_at   | LOC100507065   | 1.006668077 | 0.887391451 |
| 232259_s_at  | ZBTB11-AS1     | 1.006603858 | 0.929225353 |
| 228147_at    | SEPT7P2        | 1.006597601 | 0.967818657 |
| 243402_at    | LOC643406      | 1.006485442 | 0.884543103 |
| 1569953_at   | RP11-179B15.6  | 1.006373256 | 0.903322025 |
| 1559470_at   | D21S2088E      | 1.006328996 | 0.867930318 |
| 215185_at    | LINC00963      | 1.006220202 | 0.947302481 |
| 226924_at    | LINC00909      | 1.006183017 | 0.953008174 |
| 1555478_at   | C17orf82       | 1.006160957 | 0.870433324 |
| 1556663_s_at | LOC100506142   | 1.006139353 | 0.892127553 |
| 1561584_at   | RP11-96B5.4    | 1.006110017 | 0.859830277 |
| 1565132_at   | RBMV3AP        | 1.006096619 | 0.887099333 |
| 233529_at    | RP11-472K17.1  | 1.006085704 | 0.892001702 |
| 220159_at    | ABCA11P        | 1.005992871 | 0.956085698 |
| 229388_at    | RP11-152N13.5  | 1.005955032 | 0.955313032 |
| 1561345_at   | RP1-140J1.1    | 1.005941371 | 0.875936549 |
| 220701_at    | LINC00216      | 1.005740131 | 0.912768867 |
| 1557679_at   | ERICH1-AS1     | 1.00573011  | 0.896024784 |
| 1556827_at   | LPP-AS2        | 1.00572329  | 0.9599712   |
| 207762_at    | LPAL2          | 1.00572132  | 0.901860236 |
| 239241_at    | RP11-315O6.1   | 1.005656157 | 0.931850175 |
| 244864_at    | RP11-462L8.1   | 1.005625642 | 0.912669399 |
| 1559340_at   | TTLL11-IT1     | 1.005534538 | 0.88525813  |
| 1553399_a_at | MGC57346       | 1.005520845 | 0.912429951 |
| 1562770_at   | RP11-309I15.1  | 1.005481792 | 0.900283305 |
| 1560638_a_at | RP11-30L15.6   | 1.005455998 | 0.908055862 |
| 1553882_at   | LINC00504      | 1.005439294 | 0.879410791 |
| 1559863_a_at | AFG3L1P        | 1.005423387 | 0.90278621  |
| 230596_at    | RP11-71H17.7   | 1.005296152 | 0.981898656 |
| 1566526_at   | LINC00927      | 1.005264512 | 0.899635889 |
| 240624_x_at  | RP1-170O19.17  | 1.005255935 | 0.92631231  |
| 1558423_at   | LINC00265      | 1.005140516 | 0.928034003 |
| 243721_at    | C18orf61       | 1.005005462 | 0.903221514 |
| 1553335_x_at | LOC285696      | 1.004940308 | 0.943157683 |
| 1561598_at   | RP11-333O1.1   | 1.004922061 | 0.92959051  |
| 1562915_at   | RP11-278I4.2   | 1.00487088  | 0.88986116  |
| 1562023_at   | RP11-94M14.2   | 1.004850307 | 0.904318227 |
| 229040_at    | ITGB2-AS1      | 1.004840843 | 0.925445039 |
| 233311_at    | LOC145845      | 1.004756244 | 0.899058313 |
| 234117_at    | NPSR1-AS1      | 1.004749942 | 0.902946232 |
| 1552258_at   | LINC00152      | 1.004715518 | 0.950169144 |
| 1569218_at   | RP11-594N15.2  | 1.004661604 | 0.902133901 |
| 1559285_at   | RP11-1017G21.4 | 1.004458275 | 0.90827958  |
| 217123_x_at  | PMCHL1         | 1.004436593 | 0.910222134 |

|              |               |             |             |
|--------------|---------------|-------------|-------------|
| 1570152_at   | RP11-360K13.1 | 1.004288071 | 0.915522382 |
| 230487_at    | C6orf99       | 1.004278177 | 0.919990983 |
| 1555265_at   | ABCC13        | 1.004262742 | 0.902128349 |
| 243354_at    | HYDIN2        | 1.004245775 | 0.962093187 |
| 1559976_at   | LOC100506314  | 1.004211179 | 0.931353838 |
| 1565320_at   | RBMV3AP       | 1.004185341 | 0.948550125 |
| 225458_at    | PP7080        | 1.00417004  | 0.963260223 |
| 1559213_at   | RP11-51M18.1  | 1.004164744 | 0.877398503 |
| 231455_at    | LINC00487     | 1.004159316 | 0.95398569  |
| 1562745_at   | RP11-804H8.6  | 1.004091625 | 0.956465714 |
| 235934_at    | NAPA-AS1      | 1.004051172 | 0.933830425 |
| 1557741_at   | LOC100128176  | 1.004046293 | 0.897103566 |
| 1564539_at   | LOC647323     | 1.00403158  | 0.921049047 |
| 1568662_at   | PWRN2         | 1.003993322 | 0.89213192  |
| 1558411_at   | EGFEM1P       | 1.003958849 | 0.986343624 |
| 244886_at    | LOC389641     | 1.003896769 | 0.908785773 |
| 1557212_at   | EIF1B-AS1     | 1.003872396 | 0.943413992 |
| 238094_at    | RP5-968P14.2  | 1.003870183 | 0.963475065 |
| 234437_at    | RP11-111K18.2 | 1.003765323 | 0.957307885 |
| 244209_at    | LBX1-AS1      | 1.003667751 | 0.943354826 |
| 1569291_at   | CROCCP2       | 1.003667373 | 0.930808265 |
| 1563483_at   | LINC00869     | 1.003637088 | 0.972906762 |
| 1557865_at   | LOC100505658  | 1.003416786 | 0.913594005 |
| 242954_at    | LOC101059948  | 1.003354796 | 0.941799706 |
| 1562606_a_at | LOC440028     | 1.003350733 | 0.938641961 |
| 1563728_at   | LINC00032     | 1.003318606 | 0.953740095 |
| 1570372_at   | RP11-781A6.1  | 1.003233058 | 0.933501403 |
| 1556555_at   | LOC100129461  | 1.003117173 | 0.969675526 |
| 1558109_x_at | LOC283788     | 1.003089305 | 0.970896186 |
| 216673_at    | TTY1B         | 1.003027222 | 0.952504388 |
| 1557506_a_at | RP4-593C16.3  | 1.002916782 | 0.980907581 |
| 1552877_s_at | LINC00334     | 1.00291393  | 0.930748173 |
| 1552873_s_at | ASMTL-AS1     | 1.002876414 | 0.942685071 |
| 224644_at    | FGD5-AS1      | 1.002818009 | 0.974140431 |
| 1561141_at   | RP11-417E7.2  | 1.002765122 | 0.952935628 |
| 1570474_s_at | ANKRD30BP3    | 1.002739416 | 0.941415452 |
| 1567687_at   | CECR9         | 1.002721285 | 0.939371392 |
| 1561277_at   | LOC339298     | 1.002708669 | 0.954973723 |
| 1562173_a_at | LINC00555     | 1.002656581 | 0.951280456 |
| 244619_at    | LOC646626     | 1.002654201 | 0.960273807 |
| 1564787_at   | LOC643923     | 1.002638168 | 0.969748933 |
| 224058_s_at  | HSD17B7P2     | 1.002616544 | 0.972092322 |
| 1558765_a_at | RP3-496C20.1  | 1.002574564 | 0.950565099 |
| 1561626_at   | RP5-1033E15.3 | 1.002528998 | 0.949476893 |
| 1556901_s_at | APCDD1L-AS1   | 1.002504016 | 0.942674882 |
| 207412_x_at  | CELP          | 1.002491969 | 0.96289848  |
| 234147_at    | LOC286059     | 1.002470141 | 0.94861107  |
| 208755_x_at  | H3F3AP4       | 1.002462947 | 0.980023091 |
| 238290_at    | RP11-415J8.5  | 1.002423617 | 0.957878953 |
| 234940_s_at  | RP11-550I24.2 | 1.002361575 | 0.952926769 |

|              |               |              |             |
|--------------|---------------|--------------|-------------|
| 1554764_a_at | LINC00301     | 1.002340808  | 0.938242417 |
| 1561558_at   | PRKG1-AS1     | 1.002339712  | 0.946988346 |
| 1557021_s_at | LOC100507250  | 1.002319096  | 0.985467628 |
| 1563878_a_at | LOC338963     | 1.002305503  | 0.950269695 |
| 226295_at    | LOC100507424  | 1.002249548  | 0.974807021 |
| 1552467_at   | DSCR10        | 1.002136532  | 0.956262386 |
| 1557434_at   | LOC100506497  | 1.002071394  | 0.975913013 |
| 1566860_at   | GATM-AS1      | 1.002045951  | 0.982856707 |
| 240719_at    | ISM1-AS1      | 1.00203425   | 0.962691956 |
| 1558256_at   | LINC00662     | 1.001974157  | 0.990049952 |
| 239880_at    | UBE2E2-AS1    | 1.001927335  | 0.971924675 |
| 240006_at    | SCARNA17      | 1.001892555  | 0.984871339 |
| 233617_at    | TSPY26P       | 1.001870363  | 0.974458813 |
| 236658_at    | RPS6KA2-AS1   | 1.001847454  | 0.96878533  |
| 1561459_at   | RP11-379J5.5  | 1.001720181  | 0.975567311 |
| 231237_x_at  | RP11-219B4.3  | 1.001659032  | 0.976632609 |
| 1562934_at   | RP11-756H20.1 | 1.001557704  | 0.962747809 |
| 237253_at    | IGSF11-AS1    | 1.001500507  | 0.963618189 |
| 1559929_at   | RP1-30G7.2    | 1.001381145  | 0.97202194  |
| 1559792_at   | RP11-683O4.1  | 1.001371695  | 0.971102151 |
| 1557427_at   | RP11-799D4.4  | 1.001237015  | 0.970322612 |
| 1558202_at   | LOC145783     | 1.001111114  | 0.980475125 |
| 1559800_a_at | RP11-709D24.6 | 1.001094886  | 0.979683188 |
| 1564131_a_at | BSN-AS2       | 1.001083478  | 0.9881188   |
| 1563287_at   | RP11-168E17.1 | 1.001060908  | 0.977601628 |
| 215827_x_at  | CROCCP3       | 1.0010393    | 0.980083001 |
| 244278_at    | RP11-24D15.1  | 1.001038433  | 0.982669148 |
| 1570269_at   | RP11-764E7.1  | 1.001031739  | 0.975293188 |
| 222225_at    | RPL23AP53     | 1.00094271   | 0.983916396 |
| 210265_x_at  | POU5F1P3      | 1.000874935  | 0.988257543 |
| 1561440_at   | RP11-330M19.1 | 1.000843565  | 0.985342689 |
| 1561215_at   | RP11-366L5.1  | 1.000776268  | 0.984069139 |
| 1557802_at   | RP4-782L23.1  | 1.000756042  | 0.98575899  |
| 1556769_a_at | RP11-874J12.4 | 1.000729596  | 0.985639742 |
| 220388_at    | FER1L4        | 1.000718701  | 0.986966008 |
| 1555912_at   | ST7-AS1       | 1.000666265  | 0.996150207 |
| 1563190_at   | RP11-58G13.1  | 1.000638408  | 0.989170443 |
| 244283_x_at  | RP11-58O3.2   | 1.000580566  | 0.984936316 |
| 239386_at    | HAVCR1P1      | 1.000558478  | 0.991536252 |
| 1559880_at   | LZTS1-AS1     | 1.000491276  | 0.992471147 |
| 1561044_at   | RP11-540K16.1 | 1.000281254  | 0.996354646 |
| 1560996_at   | RP3-507I15.2  | 1.000241143  | 0.994535168 |
| 1565581_at   | RP11-648F7.1  | 1.000218723  | 0.996085622 |
| 243058_at    | RP1-170O19.14 | 1.000216538  | 0.996759846 |
| 237205_at    | LINC00238     | 1.000197133  | 0.994971378 |
| 1562474_at   | RP11-418J17.1 | 1.0001636    | 0.998588692 |
| 1553080_at   | CSN1S2AP      | 1.000098741  | 0.99782322  |
| 1570447_at   | LINC00452     | -1.000011603 | 0.999729379 |
| 1552979_at   | LINC00471     | -1.000095501 | 0.998580393 |
| 1570285_at   | RP11-443B7.1  | -1.000147248 | 0.996596679 |

|              |               |              |             |
|--------------|---------------|--------------|-------------|
| 230642_at    | RP11-297L17.2 | -1.000266577 | 0.995548363 |
| 1561508_at   | RP11-552F3.10 | -1.0002779   | 0.994601102 |
| 1560791_at   | RP11-630D6.5  | -1.000277957 | 0.994046985 |
| 1563062_at   | LINC00460     | -1.000309497 | 0.995486661 |
| 1565685_at   | LOC400940     | -1.000352795 | 0.992789779 |
| 1559861_at   | RP11-342C23.4 | -1.000439755 | 0.993610243 |
| 1564060_at   | LINC00934     | -1.000509612 | 0.991267897 |
| 226663_at    | ANKRD10-IT1   | -1.000628588 | 0.996743687 |
| 1561813_at   | RP11-16K12.2  | -1.000723602 | 0.980620424 |
| 1564819_at   | RP11-116D17.1 | -1.000729841 | 0.985222615 |
| 243555_at    | RP11-752L20.3 | -1.000734045 | 0.997585546 |
| 1562924_at   | LOC340357     | -1.000739549 | 0.988449796 |
| 243017_at    | USP27X-AS1    | -1.000772536 | 0.989553005 |
| 1560823_at   | LOC340017     | -1.00089422  | 0.978142651 |
| 208340_at    | LOC643733     | -1.00099403  | 0.98071841  |
| 1558990_at   | RP11-723J4.3  | -1.001008001 | 0.983171448 |
| 239968_at    | LINC00313     | -1.001019276 | 0.984240782 |
| 1561228_at   | LOC100506122  | -1.001032795 | 0.983036986 |
| 1554591_at   | PCAT4         | -1.001052574 | 0.983306833 |
| 233432_at    | LINC00598     | -1.001142725 | 0.983612133 |
| 1568739_at   | LOC285692     | -1.001169936 | 0.975709824 |
| 222955_s_at  | FAM45B        | -1.001186852 | 0.992535883 |
| 1558128_at   | LOC730202     | -1.001200015 | 0.984519366 |
| 1561607_at   | RP11-283I3.2  | -1.001275261 | 0.981604899 |
| 1568848_at   | RP4-813D12.3  | -1.00130655  | 0.988968643 |
| 1557702_at   | RP5-858B6.3   | -1.001353626 | 0.978370085 |
| 1553591_at   | BCRP3         | -1.001362208 | 0.977295108 |
| 1561525_at   | RP11-331K15.1 | -1.001387331 | 0.958872041 |
| 239220_at    | RP11-736K20.5 | -1.001420415 | 0.982222968 |
| 224020_at    | LINC00626     | -1.001463761 | 0.973939704 |
| 1570006_at   | LOC400958     | -1.001486416 | 0.975364219 |
| 1558571_at   | RP4-569M23.2  | -1.001488831 | 0.976984824 |
| 1560514_at   | LINC00636     | -1.001501696 | 0.97009797  |
| 1568650_a_at | RP11-540O11.1 | -1.001550649 | 0.967880843 |
| 232836_at    | LINC00687     | -1.001602302 | 0.971288716 |
| 1561351_at   | RP5-1136A10.1 | -1.001622979 | 0.968243877 |
| 238742_x_at  | RP11-532F12.5 | -1.001776598 | 0.969450955 |
| 231284_at    | LOC100506406  | -1.001842566 | 0.962773006 |
| 1559344_at   | RP11-778J15.1 | -1.001855436 | 0.959290748 |
| 240487_at    | RP11-619L12.4 | -1.001891555 | 0.955771633 |
| 235987_at    | PRKXP1        | -1.001966872 | 0.989678061 |
| 1561445_at   | RP11-461L18.1 | -1.00197025  | 0.949458402 |
| 226235_at    | LINC00667     | -1.002026436 | 0.984584003 |
| 233334_x_at  | SLX1B-SULT1A4 | -1.002057068 | 0.96919028  |
| 239541_at    | LOC100505817  | -1.00206592  | 0.949481693 |
| 226407_at    | TPT1-AS1      | -1.002078623 | 0.986391421 |
| 1562973_at   | RP11-707P20.1 | -1.002196162 | 0.955364337 |
| 1556467_at   | RP11-553L6.2  | -1.002216908 | 0.944888964 |
| 1557025_a_at | RP11-744D14.2 | -1.00221906  | 0.979789903 |
| 1554976_a_at | LINC00051     | -1.002252417 | 0.944841574 |

|              |                |              |             |
|--------------|----------------|--------------|-------------|
| 1555979_at   | RP11-54O7.3    | -1.002260119 | 0.972492561 |
| 1569782_at   | RP11-343J18.1  | -1.002286473 | 0.968247621 |
| 223443_s_at  | AMZ2P1         | -1.002488684 | 0.977870511 |
| 231190_at    | POM121L10P     | -1.002495481 | 0.961079609 |
| 215973_at    | HCG4B          | -1.002578908 | 0.964044022 |
| 1553880_at   | C10orf91       | -1.00261239  | 0.955788526 |
| 205703_at    | RP11-338K17.10 | -1.002612635 | 0.950598093 |
| 1569259_at   | RP4-737A23.2   | -1.002625194 | 0.949751501 |
| 214896_at    | RP11-2E17.1    | -1.002627309 | 0.987688687 |
| 217406_at    | RP1-149A16.17  | -1.00269356  | 0.960981927 |
| 1560939_at   | PCOLCE-AS1     | -1.002819558 | 0.942628043 |
| 227578_at    | TMPO-AS1       | -1.00282088  | 0.976993677 |
| 1556740_at   | EGFLAM-AS2     | -1.00284502  | 0.947432085 |
| 230012_at    | LINC00324      | -1.0028593   | 0.957659445 |
| 1562854_at   | RP1-206D15.3   | -1.00290269  | 0.922609816 |
| 1556784_at   | RP1-178F10.1   | -1.002956642 | 0.963306517 |
| 240169_at    | RP4-545K15.5   | -1.00296639  | 0.954205381 |
| 1561035_at   | RP11-526I2.1   | -1.002971075 | 0.961761112 |
| 1557465_at   | LINC00282      | -1.003040107 | 0.982732532 |
| 1553900_s_at | POM121L1P      | -1.003072754 | 0.940116325 |
| 1562640_at   | HOXA-AS2       | -1.003151297 | 0.95183812  |
| 1562805_at   | TLR8-AS1       | -1.003214257 | 0.945114852 |
| 1562990_at   | LINC00564      | -1.003223554 | 0.927483852 |
| 1562750_at   | RP11-546O6.4   | -1.003317321 | 0.940188175 |
| 1562776_at   | LOC339807      | -1.003336446 | 0.94697352  |
| 240944_at    | RP11-771K4.1   | -1.003465625 | 0.933219048 |
| 236668_at    | RP5-882C2.2    | -1.003475585 | 0.968885034 |
| 1566678_at   | RP11-212I21.3  | -1.003512481 | 0.929903162 |
| 1560163_at   | RP11-75C10.6   | -1.003514655 | 0.95673624  |
| 1569341_at   | RP3-337H4.8    | -1.003550531 | 0.948043233 |
| 1568686_at   | ATP8B5P        | -1.003577448 | 0.913058035 |
| 1563072_at   | RP11-171N4.1   | -1.003821873 | 0.888381563 |
| 1564315_at   | C8orf49        | -1.003865513 | 0.892855876 |
| 244798_at    | RP11-664D1.1   | -1.0038782   | 0.91651796  |
| 1563742_at   | LINC00842      | -1.003906034 | 0.922918977 |
| 1560863_a_at | RP11-91I8.1    | -1.003919535 | 0.938633421 |
| 239974_at    | LOC728095      | -1.003921313 | 0.94474781  |
| 1562549_at   | RP11-290F20.2  | -1.003927912 | 0.92854322  |
| 1556406_at   | LINC00879      | -1.004189597 | 0.930678882 |
| 1561290_at   | LOC339622      | -1.00419355  | 0.893743047 |
| 207701_at    | C22orf24       | -1.004194799 | 0.923028022 |
| 1564323_at   | RP11-747D18.1  | -1.004270252 | 0.915040781 |
| 1556030_at   | RP3-412A9.10   | -1.004284741 | 0.909441988 |
| 1553400_a_at | MGC57346       | -1.004302769 | 0.976795615 |
| 230355_at    | SEPT7P2        | -1.004331806 | 0.97401986  |
| 230545_at    | PARD3-AS1      | -1.004338654 | 0.971562456 |
| 1560958_s_at | RP11-554D15.1  | -1.004467791 | 0.93135009  |
| 1560352_at   | ENTPD1-AS1     | -1.00447254  | 0.958100936 |
| 208529_at    | BTF3P11        | -1.004484952 | 0.90445198  |
| 1563245_at   | CLYBL-AS2      | -1.004510513 | 0.907068685 |

|              |               |              |             |
|--------------|---------------|--------------|-------------|
| 1567023_at   | OR5AK4P       | -1.004583038 | 0.923486269 |
| 1569887_a_at | FAM183CP      | -1.004599538 | 0.896675151 |
| 1556388_a_at | LOC100507389  | -1.004625726 | 0.900497227 |
| 233928_at    | ADAMTS9-AS1   | -1.004650553 | 0.916784159 |
| 1569430_at   | RP11-56D16.2  | -1.004718319 | 0.9178877   |
| 1557891_s_at | STXBP5-AS1    | -1.004835071 | 0.938768993 |
| 225199_at    | RP11-473I1.10 | -1.0048596   | 0.955677946 |
| 1562997_a_at | RP11-90K6.1   | -1.004924219 | 0.91084246  |
| 1562631_at   | TEX26-AS1     | -1.00505523  | 0.899836284 |
| 1562100_at   | RP11-461F11.2 | -1.005056877 | 0.902924622 |
| 1561207_at   | RP11-53B2.2   | -1.005149093 | 0.908568509 |
| 237540_at    | LINC00644     | -1.005160168 | 0.886350127 |
| 216319_at    | RP11-69I8.2   | -1.005185008 | 0.944279626 |
| 240566_at    | RP11-266A24.1 | -1.005216646 | 0.932525508 |
| 1569784_at   | RP11-756P10.2 | -1.005244536 | 0.878816499 |
| 234686_at    | SUGT1P1       | -1.005270079 | 0.906283129 |
| 1557746_at   | RP11-254A24.2 | -1.005291078 | 0.918801719 |
| 227710_s_at  | TPT1-AS1      | -1.005338152 | 0.963549824 |
| 1562215_at   | RP11-316N24.2 | -1.005341901 | 0.909941292 |
| 1552466_x_at | LINC00161     | -1.005378543 | 0.88279139  |
| 1557646_at   | VWA8-AS1      | -1.005391704 | 0.864114564 |
| 1561540_at   | LINC00343     | -1.005457494 | 0.899634801 |
| 239395_at    | ARRDC3-AS1    | -1.005514992 | 0.88611405  |
| 1557450_s_at | WHAMMP2       | -1.005530561 | 0.922136696 |
| 1564280_x_at | LOC100133920  | -1.005695652 | 0.865760611 |
| 238380_s_at  | LINC00226     | -1.005729011 | 0.896112225 |
| 232107_at    | RP11-122G18.5 | -1.005731247 | 0.945203797 |
| 1559443_s_at | IL21R-AS1     | -1.005743333 | 0.905696395 |
| 1562222_at   | RP11-231E4.2  | -1.005747481 | 0.909343711 |
| 1559297_at   | SNX29P2       | -1.005809448 | 0.891806531 |
| 217682_at    | RP11-473I1.9  | -1.005877046 | 0.939610166 |
| 1562653_at   | RP4-697P8.3   | -1.005932636 | 0.885566171 |
| 237063_at    | RP11-44F14.8  | -1.005938926 | 0.856610487 |
| 232572_at    | PCA3          | -1.00603867  | 0.87922694  |
| 1562029_at   | RP11-855O10.2 | -1.006115759 | 0.848296862 |
| 239617_at    | GHRLOS        | -1.006143389 | 0.892152061 |
| 237552_at    | LOC100505817  | -1.006187073 | 0.856561076 |
| 237699_at    | LINC00427     | -1.00623489  | 0.877860955 |
| 1561693_at   | LOC400794     | -1.006354604 | 0.88992235  |
| 240475_at    | EGOT          | -1.006411794 | 0.891695402 |
| 237738_at    | RP11-26M5.2   | -1.006430162 | 0.858632966 |
| 1562367_at   | C15orf54      | -1.006495603 | 0.853207005 |
| 223791_at    | FAM27B        | -1.006517917 | 0.944819303 |
| 240490_at    | RP11-184I16.4 | -1.006521064 | 0.87480674  |
| 233755_at    | RP11-758M4.4  | -1.006548971 | 0.851407779 |
| 239136_at    | UNC5B-AS1     | -1.006563986 | 0.89066719  |
| 1561516_at   | RP11-12L8.1   | -1.006601981 | 0.877833347 |
| 227519_at    | PLAC4         | -1.006626857 | 0.854657793 |
| 1554142_at   | SUGT1P3       | -1.006714552 | 0.862383917 |
| 1557890_at   | STXBP5-AS1    | -1.006715102 | 0.855543328 |



|              |                        |              |             |
|--------------|------------------------|--------------|-------------|
| 1563894_at   | LOC441178              | -1.00675919  | 0.885824477 |
| 1568987_at   | MGC57346               | -1.006849438 | 0.911890116 |
| 1557724_a_at | LOC285847              | -1.006858219 | 0.870615275 |
| 236653_at    | LINC00662              | -1.006947546 | 0.938642542 |
| 236399_at    | RP11-443B7.1           | -1.007018104 | 0.845996699 |
| 228078_at    | RP11-258F1.1           | -1.007043464 | 0.892344251 |
| 212707_s_at  | RASA4CP                | -1.007048794 | 0.94660009  |
| 1562885_at   | RP11-862G15.2          | -1.007093598 | 0.857667335 |
| 1562455_at   | RP11-379K22.2          | -1.00712099  | 0.839891673 |
| 1562765_at   | WWTR1-AS1              | -1.007132315 | 0.863276117 |
| 234183_at    | RP11-673E11.2          | -1.007233069 | 0.840400037 |
| 242284_at    | LINC00466              | -1.007237622 | 0.845645177 |
| 216098_s_at  | HTR7P1                 | -1.007243541 | 0.891133901 |
| 231620_at    | RP11-561E1.1           | -1.007313247 | 0.829048948 |
| 239125_at    | SLC25A5-AS1            | -1.007324574 | 0.879897483 |
| 237490_at    | RP11-299H22.6          | -1.007351877 | 0.862601064 |
| 1562829_at   | LOC339568              | -1.007362901 | 0.896277682 |
| 1558859_at   | LOC401320              | -1.007372331 | 0.95155559  |
| 179_at       | DTX2P1-UPK3BP1-PMS2P11 | -1.007395101 | 0.865944122 |
| 207871_s_at  | ST7-OT3                | -1.00740066  | 0.937449314 |
| 1563346_at   | C21orf91-OT1           | -1.00742011  | 0.858212022 |
| 1562724_at   | LOC286114              | -1.007432216 | 0.850322492 |
| 1563385_at   | LINC00307              | -1.007437548 | 0.845826652 |
| 213801_x_at  | RPSAP9                 | -1.0075304   | 0.946069758 |
| 1562396_at   | RP11-248B24.1          | -1.007532146 | 0.813955564 |
| 1568745_at   | LOC646268              | -1.007537137 | 0.860260404 |
| 233398_at    | RP11-319E16.2          | -1.007547689 | 0.842747446 |
| 1564028_s_at | LOC154761              | -1.007613202 | 0.932565863 |
| 214304_x_at  | RP11-654A16.3          | -1.007626411 | 0.881354855 |
| 222349_x_at  | RNF126P1               | -1.007665964 | 0.889970352 |
| 1569923_s_at | LINC00491              | -1.007739457 | 0.854343097 |
| 1560646_at   | METTL21EP              | -1.007744203 | 0.826302489 |
| 230648_at    | LINC00926              | -1.007768063 | 0.848746876 |
| 1556676_a_at | RP11-425D10.10         | -1.007819694 | 0.864957826 |
| 1553320_s_at | CDC14C                 | -1.007878638 | 0.797199502 |
| 1556048_at   | LOC100507564           | -1.007933161 | 0.914858857 |
| 243785_at    | LOC100272217           | -1.007967847 | 0.946110994 |
| 1560560_at   | RP11-365O16.3          | -1.008051121 | 0.816000947 |
| 234327_at    | RP11-1007O24.3         | -1.008055071 | 0.8656357   |
| 242292_at    | FAM226B                | -1.008065305 | 0.962502139 |
| 227901_at    | LOC648987              | -1.008068476 | 0.911393264 |
| 1569264_at   | LOC400655              | -1.008104971 | 0.853619515 |
| 1562253_at   | SLC7A11-AS1            | -1.008132941 | 0.870588804 |
| 1557139_at   | DDX11-AS1              | -1.008144087 | 0.869542189 |
| 1561587_at   | LINC00907              | -1.008196422 | 0.821999297 |
| 1568919_at   | RP11-341A22.2          | -1.008262148 | 0.759658568 |
| 1556248_at   | EIF1B-AS1              | -1.008294851 | 0.890667179 |
| 1561506_at   | RP11-231K24.2          | -1.008307614 | 0.821636539 |
| 1553464_at   | FLJ40288               | -1.008355418 | 0.838427755 |
| 1562923_at   | RP11-362A1.1           | -1.008420015 | 0.827656134 |

|              |               |              |             |
|--------------|---------------|--------------|-------------|
| 240938_at    | RP11-18F14.1  | -1.008448791 | 0.792499054 |
| 1561323_at   | LOC339975     | -1.008470122 | 0.796127577 |
| 1564051_at   | RP11-410D17.2 | -1.008479278 | 0.783648932 |
| 1560246_at   | RP11-260E18.1 | -1.008506746 | 0.79581617  |
| 224142_s_at  | TTY8B         | -1.008583358 | 0.885594451 |
| 241146_at    | MAGI2-AS2     | -1.008606934 | 0.81783138  |
| 237537_at    | RP4-598G3.1   | -1.008681085 | 0.820818976 |
| 1564209_at   | LINC00700     | -1.008745645 | 0.838924006 |
| 240693_at    | RP11-63A1.2   | -1.008808557 | 0.875299522 |
| 232047_at    | LINC00969     | -1.008865354 | 0.889360441 |
| 1557850_at   | INHBA-AS1     | -1.008915769 | 0.847147716 |
| 1570080_at   | RP5-1073O3.7  | -1.00892949  | 0.864740024 |
| 1570136_at   | RP11-483C6.1  | -1.008935077 | 0.947498048 |
| 1569963_at   | RP11-426A6.5  | -1.008938839 | 0.811227834 |
| 1558168_at   | H1FX-AS1      | -1.008940018 | 0.795763968 |
| 1556400_at   | RP11-547D24.1 | -1.008943914 | 0.820654101 |
| 1561528_at   | RP11-575F12.1 | -1.009016663 | 0.820326814 |
| 1556362_at   | RP4-809F18.1  | -1.00904291  | 0.803090558 |
| 241124_at    | RP11-44F21.2  | -1.009053268 | 0.814369444 |
| 1569095_at   | LOC731424     | -1.009056937 | 0.843698126 |
| 1564367_at   | CXXC1P1       | -1.009100671 | 0.80021118  |
| 224292_at    | TTY13         | -1.009158073 | 0.871793532 |
| 229223_at    | RP11-96D1.11  | -1.009170752 | 0.855968184 |
| 1563092_at   | RP11-791M20.1 | -1.009228443 | 0.8830619   |
| 1558412_at   | LOC113230     | -1.009230382 | 0.911862195 |
| 243351_at    | FZD10-AS1     | -1.009234298 | 0.878844659 |
| 238685_at    | STXBP5-AS1    | -1.009243879 | 0.837599628 |
| 1564282_a_at | LINC00491     | -1.009274713 | 0.825033481 |
| 238691_at    | SNHG10        | -1.009284408 | 0.8799595   |
| 1553924_at   | FMO9P         | -1.009383724 | 0.830469439 |
| 233830_at    | LOC90246      | -1.009406025 | 0.87086097  |
| 1557008_at   | LOC340107     | -1.009427928 | 0.854355017 |
| 1557848_at   | RP11-626I20.3 | -1.009431255 | 0.803960852 |
| 224174_at    | TTY11         | -1.009453368 | 0.838553864 |
| 1561545_at   | EPN2-AS1      | -1.00948881  | 0.847039965 |
| 1566689_at   | RP11-157B13.7 | -1.009514517 | 0.818400483 |
| 215229_at    | LOC100129973  | -1.009528132 | 0.924668214 |
| 1555580_at   | RP11-89M16.1  | -1.009550931 | 0.814983733 |
| 1561354_at   | RP11-151E14.1 | -1.009649417 | 0.840186016 |
| 1563142_at   | RP11-521D12.1 | -1.009762272 | 0.850905658 |
| 237044_s_at  | ZNF503-AS2    | -1.009820929 | 0.90085541  |
| 215504_x_at  | ANKRD10-IT1   | -1.009835081 | 0.87465661  |
| 1560812_at   | RP11-899L11.1 | -1.009843716 | 0.78209932  |
| 240306_at    | LINC00312     | -1.009896082 | 0.849493125 |
| 1556492_a_at | RP11-687F6.1  | -1.009929352 | 0.872320333 |
| 1564552_at   | RP11-678G15.1 | -1.009940062 | 0.857782818 |
| 1560581_at   | RP11-804F13.1 | -1.009988856 | 0.706212887 |
| 1561062_a_at | RP11-259A24.1 | -1.010036911 | 0.814286675 |
| 1561383_at   | LOC284661     | -1.010037044 | 0.764572262 |
| 224110_at    | PRO1804       | -1.010106943 | 0.792878717 |

|              |               |              |             |
|--------------|---------------|--------------|-------------|
| 240917_at    | RP11-506B6.6  | -1.010119101 | 0.818857706 |
| 1562909_at   | LINC00862     | -1.010132172 | 0.774532083 |
| 236631_at    | LINC00319     | -1.01023901  | 0.811355579 |
| 1560260_at   | LOC285593     | -1.010287857 | 0.82968034  |
| 242507_at    | UBXN7-AS1     | -1.010443358 | 0.948597951 |
| 1558601_at   | TUSC7         | -1.010454891 | 0.842835804 |
| 1570484_at   | RP11-669I1.1  | -1.010462067 | 0.817612755 |
| 236986_at    | LINC00582     | -1.010520156 | 0.820607112 |
| 216544_at    | RBMV2FP       | -1.010571453 | 0.700428963 |
| 237617_at    | LOC100506675  | -1.010600671 | 0.737802925 |
| 1562983_at   | LOC441025     | -1.010601223 | 0.794026594 |
| 220465_at    | CEBPA-AS1     | -1.010624256 | 0.827899794 |
| 230488_s_at  | DBH-AS1       | -1.01063977  | 0.86942585  |
| 236369_at    | TSPY26P       | -1.01064135  | 0.898346729 |
| 232260_at    | ZBTB11-AS1    | -1.010671732 | 0.755405398 |
| 216786_at    | FAM224A       | -1.010738305 | 0.809269138 |
| 1555264_a_at | LINC00598     | -1.010857584 | 0.775615042 |
| 1562740_at   | DNAJB8-AS1    | -1.01087036  | 0.830434283 |
| 1569287_at   | LINC00458     | -1.010878471 | 0.778728751 |
| 1563255_at   | FAM170B-AS1   | -1.010879709 | 0.822549673 |
| 1557672_s_at | RSU1P2        | -1.01090648  | 0.80925249  |
| 241525_at    | LOC200772     | -1.01091522  | 0.819983989 |
| 1569600_at   | DLEU2         | -1.01106657  | 0.931420332 |
| 229990_at    | TSC22D1-AS1   | -1.011116466 | 0.801547616 |
| 1552961_at   | RP11-85I17.2  | -1.011226609 | 0.759358081 |
| 237536_at    | MAPT-AS1      | -1.011338345 | 0.786108472 |
| 1555224_at   | CCDC148-AS1   | -1.011367166 | 0.790502053 |
| 1569544_at   | RP11-460N16.1 | -1.011367281 | 0.699045586 |
| 1557567_a_at | LOC100507634  | -1.011370652 | 0.878536382 |
| 243425_at    | RP11-568J23.6 | -1.011387531 | 0.800767625 |
| 1566658_at   | RP11-151A6.6  | -1.011403266 | 0.796723811 |
| 239120_at    | TMEM51-AS1    | -1.011404219 | 0.895083387 |
| 1558899_s_at | RGMB-AS1      | -1.0114098   | 0.85318168  |
| 242874_at    | RP11-747H7.3  | -1.011432814 | 0.954079766 |
| 237522_at    | FAS-AS1       | -1.011509706 | 0.78787365  |
| 220222_at    | RBM12B-AS1    | -1.011514812 | 0.818447911 |
| 1553299_at   | DUSP5P1       | -1.011538628 | 0.94301626  |
| 233151_s_at  | TTY7          | -1.011542    | 0.833944617 |
| 1561432_at   | RP11-539G18.2 | -1.011558633 | 0.884613076 |
| 236385_at    | RP11-382B18.4 | -1.011560215 | 0.921158268 |
| 1553747_at   | MGC16025      | -1.011567055 | 0.83330656  |
| 1556529_a_at | LINC00692     | -1.011570732 | 0.750901608 |
| 1565775_at   | RP11-856M7.1  | -1.011681572 | 0.778011036 |
| 1558515_at   | FTX           | -1.011691272 | 0.94162901  |
| 244135_at    | RP11-177H2.2  | -1.011696112 | 0.805800976 |
| 1561211_at   | RP1-18D14.7   | -1.011728926 | 0.806706201 |
| 1563825_at   | RP11-405M12.2 | -1.011765515 | 0.828203397 |
| 1569954_at   | RP11-354E11.2 | -1.011879464 | 0.699563815 |
| 232900_at    | HERC2P7       | -1.01191198  | 0.812070818 |
| 235886_at    | LOC100505666  | -1.01192414  | 0.820354737 |

|              |                |              |             |
|--------------|----------------|--------------|-------------|
| 223630_at    | C7orf13        | -1.011935576 | 0.930125192 |
| 244446_at    | RP11-301H24.3  | -1.011939846 | 0.820177282 |
| 240407_at    | LOC100126784   | -1.011974003 | 0.953203529 |
| 241846_at    | HCG18          | -1.012017787 | 0.837185828 |
| 1562866_at   | RP11-184E9.2   | -1.012131726 | 0.669761389 |
| 238387_s_at  | LINC00226      | -1.01217485  | 0.788827268 |
| 228056_s_at  | NAPSB          | -1.012311459 | 0.959703283 |
| 217308_at    | OR1F2P         | -1.012315902 | 0.770212892 |
| 240083_at    | MEG8           | -1.012366889 | 0.84686544  |
| 211458_s_at  | GABARAPL3      | -1.012417536 | 0.936387043 |
| 211931_s_at  | HNRNPA3P1      | -1.012460787 | 0.895699456 |
| 238997_at    | PSORS1C3       | -1.012475757 | 0.765430719 |
| 1557026_at   | RP4-781K5.4    | -1.012485979 | 0.791625767 |
| 1562873_at   | PWRN1          | -1.012489068 | 0.764957645 |
| 237260_at    | LOC100505978   | -1.012528851 | 0.755606032 |
| 1562589_at   | RP3-437I16.1   | -1.012538024 | 0.70314488  |
| 1555363_s_at | LINC00663      | -1.012573803 | 0.918422393 |
| 243248_at    | RP11-470M17.2  | -1.012575062 | 0.735662927 |
| 1553298_at   | C17orf77       | -1.012584446 | 0.718212085 |
| 219865_at    | LINC00339      | -1.012600314 | 0.918407599 |
| 222327_x_at  | OR7E156P       | -1.012697228 | 0.852127522 |
| 243408_at    | RP11-774O3.1   | -1.012740948 | 0.831443668 |
| 1561256_at   | RP5-991O23.1   | -1.012843503 | 0.726642381 |
| 1555485_s_at | LOC100507387   | -1.012846365 | 0.916337805 |
| 1562942_at   | RP11-982M15.6  | -1.012889042 | 0.776478679 |
| 1561318_at   | RP11-84D1.2    | -1.012903198 | 0.783642295 |
| 1563610_at   | LOC157273      | -1.012916534 | 0.688629132 |
| 1565152_at   | RP11-118G23.2  | -1.012941566 | 0.741775779 |
| 1556459_at   | ARHGAP22-IT1   | -1.012961676 | 0.730307669 |
| 239513_at    | ADORA2A-AS1    | -1.012973734 | 0.772532034 |
| 233190_at    | RP11-266E14.1  | -1.012984648 | 0.7720713   |
| 1569023_a_at | LINC00458      | -1.013071733 | 0.7058734   |
| 1560870_a_at | RP11-1012E15.1 | -1.013088926 | 0.740990754 |
| 237163_x_at  | LOC390705      | -1.013110394 | 0.750520096 |
| 1563876_at   | C1orf220       | -1.013131728 | 0.841654822 |
| 1563681_at   | RP11-108B14.5  | -1.01320081  | 0.72343835  |
| 229820_at    | LINC00969      | -1.013204474 | 0.876130729 |
| 221415_s_at  | GJA9-MYCBP     | -1.013270794 | 0.718472398 |
| 237242_at    | LINC00661      | -1.013295758 | 0.769291062 |
| 238031_at    | RP11-347C12.10 | -1.013302209 | 0.789545657 |
| 1563099_at   | LOC100507053   | -1.013377488 | 0.684602497 |
| 239777_at    | C14orf182      | -1.013415053 | 0.754333894 |
| 1557660_s_at | FAM170B-AS1    | -1.013441853 | 0.748396884 |
| 229557_at    | MEG3           | -1.013458899 | 0.963702334 |
| 240830_at    | SCARNA17       | -1.013505287 | 0.913915697 |
| 1561371_at   | FLJ39080       | -1.013528596 | 0.772999426 |
| 1561916_at   | RP11-340I6.8   | -1.013560172 | 0.807799748 |
| 1564253_at   | LOC285766      | -1.01359465  | 0.724474606 |
| 216667_at    | ECRP           | -1.013612234 | 0.847952144 |
| 230854_at    | BCAR4          | -1.013635144 | 0.758334797 |

|              |                  |              |             |
|--------------|------------------|--------------|-------------|
| 1557825_at   | RP11-1E4.1       | -1.013656414 | 0.851874583 |
| 233048_at    | RP11-38L15.2     | -1.013663058 | 0.822280794 |
| 1557693_at   | SMC5-AS1         | -1.013784763 | 0.726865185 |
| 1557044_at   | LINC00665        | -1.013791943 | 0.916613426 |
| 1570405_at   | RP11-34F13.2     | -1.0137937   | 0.765197471 |
| 1561224_at   | RP11-189E14.4    | -1.013861586 | 0.760797719 |
| 231518_at    | LINC00922        | -1.013884903 | 0.818595979 |
| 1560810_at   | RP11-669N7.3     | -1.014003254 | 0.724494452 |
| 1564337_at   | RP11-744N12.3    | -1.014009882 | 0.750555105 |
| 1558611_at   | MGC57346         | -1.014026422 | 0.75808392  |
| 1564291_at   | RP11-109D24.1    | -1.014092471 | 0.757259611 |
| 1561519_at   | RP11-508O18.1    | -1.014136901 | 0.752250236 |
| 243776_at    | RP11-63A11.1     | -1.01414777  | 0.787299873 |
| 1563310_a_at | RP11-7F17.4      | -1.014171781 | 0.644324874 |
| 1556496_a_at | RP11-521I2.3     | -1.014192336 | 0.803947074 |
| 226708_at    | RP11-661A12.9    | -1.014241183 | 0.782446431 |
| 1556829_at   | TIPARP-AS1       | -1.01424487  | 0.77762049  |
| 1562078_at   | RP11-24P4.1      | -1.014274653 | 0.770416563 |
| 1564072_at   | MYH16            | -1.014324211 | 0.694596382 |
| 231229_at    | HILS1            | -1.014423487 | 0.830180799 |
| 235053_at    | RP11-257O5.2     | -1.014430041 | 0.907942545 |
| 1570020_at   | AACSP1           | -1.014492925 | 0.636307645 |
| 222278_at    | RP1-302G2.5      | -1.014510486 | 0.780949776 |
| 1562659_at   | LOC400548        | -1.014538691 | 0.680972155 |
| 210444_at    | NPY6R            | -1.0145458   | 0.801306516 |
| 237519_at    | RP11-445L13__B.3 | -1.01454838  | 0.749751542 |
| 237392_at    | FGF14-IT1        | -1.014552431 | 0.822118737 |
| 241171_at    | RP11-669M16.1    | -1.014568388 | 0.791597552 |
| 237312_at    | LOC100506272     | -1.014577388 | 0.748793717 |
| 1562870_at   | RP11-1007G5.2    | -1.014594033 | 0.6793991   |
| 226903_s_at  | RP11-812E19.3    | -1.014666675 | 0.790838221 |
| 234180_at    | RP11-674P19.2    | -1.014683589 | 0.806735339 |
| 1569831_at   | RP11-586K2.1     | -1.014688787 | 0.752690542 |
| 1570541_s_at | GBP1P1           | -1.014715506 | 0.798354741 |
| 219961_s_at  | PLK1S1           | -1.014781944 | 0.917975703 |
| 220211_at    | FLJ13224         | -1.014890326 | 0.728201672 |
| 243485_at    | RP5-944M2.2      | -1.014918255 | 0.706042441 |
| 1553258_at   | FLJ30679         | -1.015007227 | 0.785583234 |
| 1567022_at   | OR5AK4P          | -1.015040723 | 0.689025162 |
| 1570131_at   | LOC285847        | -1.015047472 | 0.779323869 |
| 243844_at    | RP11-138I17.1    | -1.015051162 | 0.709595216 |
| 1567241_at   | OR2L1P           | -1.015136914 | 0.728233017 |
| 234219_at    | RP11-30P6.6      | -1.015138176 | 0.805447674 |
| 240746_s_at  | RP11-245J24.1    | -1.015146398 | 0.693259067 |
| 1561050_a_at | NAV2-IT1         | -1.015181275 | 0.71063804  |
| 235994_s_at  | TINCR            | -1.015184009 | 0.749672034 |
| 1566219_at   | KRTAP5-AS1       | -1.015188274 | 0.902444874 |
| 230222_at    | RP11-456H18.2    | -1.01522973  | 0.795410894 |
| 1557369_a_at | LINC00698        | -1.015300504 | 0.928763651 |
| 237584_at    | RP11-684N3.1     | -1.015323396 | 0.943033351 |

|              |               |              |             |
|--------------|---------------|--------------|-------------|
| 1561555_at   | RP11-375F2.2  | -1.015332786 | 0.665974058 |
| 236835_at    | FUT8-AS1      | -1.015390964 | 0.902103169 |
| 1553658_at   | LINC00896     | -1.015444612 | 0.733736997 |
| 214561_at    | LILRP2        | -1.015463662 | 0.785467543 |
| 1563983_at   | TPT1-AS1      | -1.015504575 | 0.784679083 |
| 1562122_at   | RP11-214N1.1  | -1.015522555 | 0.635252061 |
| 207252_at    | INE1          | -1.015539445 | 0.681790129 |
| 1568938_at   | RP5-1109J22.2 | -1.015556431 | 0.691797394 |
| 207524_at    | ST7-OT3       | -1.015561443 | 0.821955791 |
| 1569925_at   | DNAH17-AS1    | -1.015566034 | 0.780005372 |
| 243760_at    | MIPEPP3       | -1.015590633 | 0.725046185 |
| 1568663_a_at | PWRN2         | -1.015603087 | 0.772302846 |
| 1558336_at   | RP11-560G2.1  | -1.015647257 | 0.747246939 |
| 1564352_at   | CECR3         | -1.015679952 | 0.602367135 |
| 236490_at    | RP11-845C23.3 | -1.015746587 | 0.707498659 |
| 207377_at    | PPP1R2P9      | -1.015750202 | 0.783301748 |
| 1567028_s_at | SH3GL1P2      | -1.015804195 | 0.81698924  |
| 1562491_at   | RP11-79E3.3   | -1.015830293 | 0.640985829 |
| 1562903_at   | FAM86B3P      | -1.015892766 | 0.836691699 |
| 244875_at    | ASMTL-AS1     | -1.015898985 | 0.739700487 |
| 235929_s_at  | ZNF503-AS2    | -1.015904018 | 0.755796816 |
| 236598_at    | LOC100996579  | -1.015938921 | 0.729739766 |
| 1562447_a_at | PPP1R26-AS1   | -1.015955588 | 0.751406451 |
| 237980_at    | LINC00347     | -1.015980829 | 0.715991942 |
| 1556999_at   | LOC100271832  | -1.016027408 | 0.722822189 |
| 1560563_at   | RP11-388C12.1 | -1.016065014 | 0.789291147 |
| 241522_at    | LINC00454     | -1.016123387 | 0.724566853 |
| 1556123_a_at | RAB11B-AS1    | -1.016135942 | 0.82631337  |
| 216722_at    | VENTXP1       | -1.016153876 | 0.639241231 |
| 1569755_at   | LINC00276     | -1.016173724 | 0.82525354  |
| 239747_s_at  | RP11-351M8.1  | -1.016201057 | 0.738917418 |
| 1562058_at   | RP11-114G22.1 | -1.016202913 | 0.660020665 |
| 238527_at    | CLUHP3        | -1.01622192  | 0.661856851 |
| 1562621_at   | RP11-26J3.1   | -1.016247838 | 0.841352161 |
| 238113_at    | SMIM2-AS1     | -1.016311294 | 0.745188087 |
| 1556912_at   | RP11-837J7.3  | -1.01631472  | 0.595154856 |
| 1557717_at   | LINC00550     | -1.016365795 | 0.649214431 |
| 1562754_at   | LOC339260     | -1.016429852 | 0.754056022 |
| 1557161_at   | LOC100132735  | -1.016431594 | 0.647181229 |
| 215141_at    | NOP14-AS1     | -1.01643259  | 0.711992129 |
| 1564772_at   | RP11-31K23.2  | -1.016439444 | 0.512215283 |
| 1561539_at   | LOC100506368  | -1.016458914 | 0.76342929  |
| 227009_at    | RP11-890B15.3 | -1.016516104 | 0.845156402 |
| 242683_at    | LINC00668     | -1.016528109 | 0.721456486 |
| 1564144_at   | RP11-274H24.1 | -1.016543063 | 0.712304557 |
| 1559522_at   | LOC100505918  | -1.016588002 | 0.720316563 |
| 216698_x_at  | OR7E12P       | -1.016710346 | 0.822291293 |
| 232191_at    | ERVH48-1      | -1.01671431  | 0.771071308 |
| 236785_at    | RP3-325F22.3  | -1.016775727 | 0.776732726 |
| 1556921_at   | RP4-753D4.2   | -1.016777738 | 0.617807237 |

|              |                |              |             |
|--------------|----------------|--------------|-------------|
| 217317_s_at  | HERC2P9        | -1.016783387 | 0.918413899 |
| 1559510_at   | LINC00630      | -1.016794131 | 0.68927247  |
| 220608_s_at  | RP11-463I20.1  | -1.016796564 | 0.871597549 |
| 232575_at    | PCA3           | -1.016938738 | 0.499067882 |
| 1561732_at   | RP1-69M21.2    | -1.016957242 | 0.617366279 |
| 1563165_at   | RP11-8L2.1     | -1.016978829 | 0.649534864 |
| 233410_at    | CYP1B1-AS1     | -1.016996567 | 0.687366473 |
| 1559110_at   | RP1-212P9.2    | -1.017015321 | 0.793504654 |
| 1569496_s_at | LOC100130872   | -1.017023999 | 0.710744693 |
| 1560633_a_at | C21orf91-OT1   | -1.017026604 | 0.737263621 |
| 212181_s_at  | NUDT4P1        | -1.017071967 | 0.90212103  |
| 207287_at    | BIN3-IT1       | -1.017073212 | 0.760156254 |
| 233088_at    | RP11-1102P22.1 | -1.017127007 | 0.778081571 |
| 244268_x_at  | LOC646214      | -1.017132409 | 0.74866419  |
| 1563174_at   | RP11-271O3.1   | -1.017168485 | 0.684033025 |
| 240767_x_at  | VPS13A-AS1     | -1.017336235 | 0.636802963 |
| 226900_at    | GABPB1-AS1     | -1.017413825 | 0.785245826 |
| 1562013_a_at | LOC100506730   | -1.01742082  | 0.859697577 |
| 208246_x_at  | RP11-403P17.4  | -1.017495925 | 0.865313643 |
| 1557647_a_at | VWA8-AS1       | -1.0175222   | 0.70916646  |
| 1560753_at   | RP11-215E13.2  | -1.017532933 | 0.722440548 |
| 224139_at    | SHANK2-AS3     | -1.017548093 | 0.65718747  |
| 1563297_s_at | RP11-643M14.1  | -1.017570901 | 0.682339791 |
| 237787_at    | LOC100996263   | -1.017587442 | 0.641597501 |
| 244505_at    | RP11-646I6.6   | -1.01764251  | 0.853166023 |
| 231593_at    | RP11-960B9.2   | -1.01765125  | 0.733418178 |
| 1559316_at   | RP11-774D14.1  | -1.017719203 | 0.722942952 |
| 78383_at     | TOPORS-AS1     | -1.017740424 | 0.803680567 |
| 232190_x_at  | LOC115110      | -1.017778419 | 0.655647114 |
| 1553122_s_at | RNAKDN         | -1.017782406 | 0.902077479 |
| 1561590_a_at | CNTFR-AS1      | -1.017861372 | 0.688297971 |
| 1562598_at   | DLG5-AS1       | -1.017862734 | 0.74429717  |
| 1560946_at   | RP11-287D1.2   | -1.017913598 | 0.74674119  |
| 233948_at    | TBX5-AS1       | -1.017939654 | 0.684503182 |
| 1569786_at   | RP11-572C15.5  | -1.017978175 | 0.636068191 |
| 1562054_at   | SMEK3P         | -1.018041336 | 0.542499102 |
| 1562759_at   | RP13-270P17.2  | -1.018063848 | 0.664231288 |
| 207894_s_at  | TCL6           | -1.018073877 | 0.62095141  |
| 208585_at    | BTN2A3P        | -1.018164679 | 0.778837171 |
| 1561700_at   | RP11-489P6.1   | -1.018179101 | 0.677356873 |
| 1570473_at   | ANKRD30BP3     | -1.018223787 | 0.704017431 |
| 224153_s_at  | DHRS4-AS1      | -1.018238861 | 0.666556286 |
| 1569673_at   | RP11-21L23.2   | -1.018300083 | 0.630396201 |
| 1558308_at   | LINC00942      | -1.018300217 | 0.729610598 |
| 220772_at    | BPESC1         | -1.018317921 | 0.580290876 |
| 236601_at    | RP11-276H7.2   | -1.018357069 | 0.750446346 |
| 1554666_at   | LOC100130950   | -1.01838494  | 0.702013835 |
| 238263_at    | EPHA1-AS1      | -1.018452903 | 0.734347278 |
| 1561339_at   | RP11-214L13.1  | -1.018470014 | 0.726347069 |
| 215975_x_at  | GK-AS1         | -1.01850679  | 0.703480203 |

|              |               |              |             |
|--------------|---------------|--------------|-------------|
| 1556844_at   | LOC100132078  | -1.018521542 | 0.657643259 |
| 1562729_at   | RP11-893F2.14 | -1.01853925  | 0.684225273 |
| 238244_at    | LINC00535     | -1.018546156 | 0.686251727 |
| 1559627_at   | C7orf71       | -1.018569255 | 0.644775193 |
| 1564878_at   | RP11-231E4.2  | -1.018573668 | 0.690107258 |
| 1562566_at   | TRAF3IP2-AS1  | -1.01860684  | 0.596921082 |
| 237028_at    | ENO1-AS1      | -1.018686215 | 0.909304543 |
| 233604_at    | FLJ22763      | -1.018698073 | 0.482859999 |
| 1553931_at   | OSTCP1        | -1.018710162 | 0.559968396 |
| 1561370_at   | LOC100505716  | -1.018725761 | 0.628661    |
| 1562044_at   | RP11-632K5.3  | -1.018729944 | 0.713604076 |
| 207028_at    | MYCNOS        | -1.018733456 | 0.592896237 |
| 1557692_a_at | RP11-519G16.1 | -1.018752395 | 0.498358249 |
| 1563219_at   | NADK2-AS1     | -1.018776842 | 0.630739411 |
| 238620_at    | RP11-846E15.4 | -1.018778032 | 0.89694878  |
| 214750_at    | PLAC4         | -1.018850186 | 0.687453244 |
| 233541_at    | LIMD1-AS1     | -1.018860145 | 0.650727667 |
| 1561085_at   | LOC153910     | -1.018914303 | 0.695830019 |
| 1562424_at   | LOC285889     | -1.018918775 | 0.632574349 |
| 1570268_at   | RP11-363G15.2 | -1.018937929 | 0.539164077 |
| 237668_at    | LOC100507201  | -1.018950097 | 0.564790012 |
| 243823_at    | RP1-28O17.1   | -1.018981208 | 0.618703987 |
| 1555083_at   | RPL13AP17     | -1.018998252 | 0.681069339 |
| 230817_at    | RP11-103H7.5  | -1.01905735  | 0.582900117 |
| 217013_at    | AZGP1P1       | -1.019103955 | 0.586271049 |
| 1569885_at   | LINC00882     | -1.019196385 | 0.704474109 |
| 1554403_a_at | RP11-574H6.1  | -1.019205638 | 0.638480706 |
| 237880_at    | LOC100506457  | -1.019219479 | 0.599986209 |
| 1563179_at   | RP3-400B16.4  | -1.019338204 | 0.528110303 |
| 1553919_at   | C9orf62       | -1.019383458 | 0.632777614 |
| 1561419_at   | Z83844.1      | -1.019400317 | 0.658810879 |
| 232022_at    | RP11-477D19.2 | -1.019405347 | 0.813347185 |
| 1557541_at   | FAM201A       | -1.019425969 | 0.714753332 |
| 244255_at    | LOC286114     | -1.019436761 | 0.645864528 |
| 238139_at    | RP5-968P14.2  | -1.019537478 | 0.838339449 |
| 1554839_at   | CIDCEP        | -1.019551689 | 0.710310684 |
| 222072_at    | ADD3-AS1      | -1.019656432 | 0.687238939 |
| 242135_at    | LOC642236     | -1.019718526 | 0.626669591 |
| 1568844_at   | RP11-716D16.1 | -1.019773286 | 0.685946813 |
| 222211_x_at  | SCAND2P       | -1.019824189 | 0.686194482 |
| 231313_at    | FLJ27354      | -1.019866103 | 0.803478941 |
| 231024_at    | PGM5-AS1      | -1.019890999 | 0.88923636  |
| 237789_at    | RP11-67L3.4   | -1.019898299 | 0.697441992 |
| 1561213_at   | RP4-598G3.1   | -1.019922255 | 0.528468316 |
| 233524_at    | LINC00475     | -1.020019485 | 0.698960426 |
| 1555980_a_at | RP11-54O7.3   | -1.020068748 | 0.773798627 |
| 221971_x_at  | AGAP11        | -1.020079718 | 0.842921709 |
| 1560881_a_at | LINC00112     | -1.020099682 | 0.712251493 |
| 237598_at    | SEC1P         | -1.020124046 | 0.672181251 |
| 216830_at    | HERC2P10      | -1.020134441 | 0.714723028 |



|              |               |              |             |
|--------------|---------------|--------------|-------------|
| 234216_at    | FLJ21408      | -1.020182267 | 0.629446119 |
| 208287_at    | HCG9          | -1.020197582 | 0.645938794 |
| 241423_at    | ZBED3-AS1     | -1.020237456 | 0.74719873  |
| 1561984_at   | LINC00838     | -1.020284865 | 0.586897202 |
| 1563263_at   | RP11-960L18.1 | -1.020315383 | 0.714520753 |
| 1562826_at   | RP11-429H9.4  | -1.020325953 | 0.751123012 |
| 1569739_at   | LOC221946     | -1.020345594 | 0.615553216 |
| 1557466_at   | FLJ31104      | -1.020381726 | 0.770660655 |
| 1564070_s_at | HOTTIP        | -1.020407135 | 0.637855201 |
| 228048_at    | ZNF503-AS2    | -1.020421799 | 0.638806719 |
| 237754_at    | RP11-178L8.5  | -1.020449957 | 0.681473604 |
| 1558982_at   | ANKRD20A12P   | -1.020539145 | 0.805927452 |
| 1570189_at   | LINC00671     | -1.020573247 | 0.537710262 |
| 1564178_at   | LINC00841     | -1.020584703 | 0.652754463 |
| 1557382_x_at | AGAP11        | -1.020636319 | 0.725360972 |
| 238298_at    | LINC00845     | -1.020666694 | 0.635309778 |
| 1553780_at   | LINC00638     | -1.020790028 | 0.717928674 |
| 235416_at    | LOC643201     | -1.020880861 | 0.726172284 |
| 1557731_at   | LOC400620     | -1.020886572 | 0.640033621 |
| 242136_x_at  | MGC70870      | -1.02096651  | 0.850465275 |
| 1553434_at   | CYP4Z2P       | -1.021091208 | 0.623218983 |
| 1560582_a_at | RP11-804F13.1 | -1.021267261 | 0.610605064 |
| 1561978_at   | LOC284798     | -1.021330107 | 0.601007903 |
| 1563103_at   | RP11-429H9.4  | -1.021333935 | 0.638303793 |
| 218994_s_at  | STAG3L4       | -1.02135275  | 0.854074727 |
| 1560619_at   | LINC00935     | -1.021501429 | 0.594324289 |
| 207161_at    | KIAA0087      | -1.021542412 | 0.557463141 |
| 1562972_at   | LINC00929     | -1.021557094 | 0.609621927 |
| 1561593_at   | RP11-400D2.2  | -1.021582878 | 0.618819451 |
| 1569090_x_at | LINC00957     | -1.021601158 | 0.683387505 |
| 230776_at    | RNF157-AS1    | -1.021618091 | 0.912162484 |
| 1558881_at   | LINC00924     | -1.02171377  | 0.86934998  |
| 235499_at    | LOC728743     | -1.021781918 | 0.699344068 |
| 1561083_at   | RP11-243E13.1 | -1.021802934 | 0.520332232 |
| 1560213_at   | HCP5B         | -1.02186949  | 0.635011115 |
| 1557424_at   | LOC100505878  | -1.02187051  | 0.462474579 |
| 1558195_at   | LINC00592     | -1.021890662 | 0.688021109 |
| 1554187_at   | LOC554206     | -1.021935761 | 0.618273832 |
| 1568852_x_at | RP11-295M18.2 | -1.021969774 | 0.549394586 |
| 215608_at    | RP11-229O3.1  | -1.021996762 | 0.790124345 |
| 239779_at    | RP11-326C3.2  | -1.022135909 | 0.661649716 |
| 1562499_at   | RP11-314P15.1 | -1.022140703 | 0.387140358 |
| 1562616_at   | RP11-809F4.3  | -1.022151504 | 0.477095257 |
| 239157_at    | ZSCAN12P1     | -1.022192609 | 0.769888176 |
| 1566844_at   | PER4          | -1.022204874 | 0.671779776 |
| 1557822_at   | LOC401134     | -1.022230655 | 0.611017361 |
| 1556366_s_at | LY86-AS1      | -1.022238626 | 0.873998619 |
| 240323_at    | RP11-728F11.4 | -1.022322328 | 0.640160084 |
| 244374_at    | TINCR         | -1.022374379 | 0.727649668 |
| 237415_at    | RP11-493L12.3 | -1.022394425 | 0.563774499 |

|              |               |              |             |
|--------------|---------------|--------------|-------------|
| 1570085_at   | LOC100506679  | -1.022416552 | 0.605595313 |
| 1570155_at   | RP11-706J10.1 | -1.022454163 | 0.591526993 |
| 237771_s_at  | RP11-614F17.2 | -1.022518623 | 0.787474509 |
| 237170_at    | LOC100507384  | -1.022591601 | 0.601695959 |
| 236870_at    | IQCF4         | -1.022635421 | 0.476954231 |
| 240682_at    | LINC00293     | -1.022707154 | 0.6338981   |
| 1554880_at   | DKFZP434K028  | -1.022768818 | 0.594465454 |
| 1553443_at   | FER1L6-AS1    | -1.022824705 | 0.514773    |
| 237957_at    | LOC643711     | -1.022840657 | 0.583294486 |
| 200080_s_at  | H3F3AP4       | -1.022873294 | 0.772721824 |
| 1561407_at   | RP11-399D2.1  | -1.022888514 | 0.475542979 |
| 1568635_at   | LINC00354     | -1.022912945 | 0.56828451  |
| 225457_s_at  | PP7080        | -1.022923946 | 0.811997681 |
| 1557009_a_at | LOC340107     | -1.022933137 | 0.622648791 |
| 1558967_s_at | HCG18         | -1.022942578 | 0.732586741 |
| 1559205_s_at | LOC100996286  | -1.022955102 | 0.582623631 |
| 1561469_at   | RP11-452H21.4 | -1.022969919 | 0.546245869 |
| 240740_at    | LOC100507443  | -1.023099467 | 0.44937289  |
| 232227_at    | RP11-251M1.1  | -1.023136757 | 0.568628578 |
| 1557993_at   | RP11-510J16.3 | -1.023152212 | 0.545055301 |
| 1569763_at   | RP11-443A13.5 | -1.023153716 | 0.537118087 |
| 222361_at    | TUBBP5        | -1.02318563  | 0.73915311  |
| 1561198_at   | LOC100506127  | -1.023216177 | 0.62204808  |
| 234400_at    | RP5-968J1.1   | -1.023347298 | 0.665523941 |
| 242246_x_at  | MEG3          | -1.023486417 | 0.685046231 |
| 232684_at    | ZNF503-AS1    | -1.023548533 | 0.575967972 |
| 1553741_at   | LINC00337     | -1.023556842 | 0.578360676 |
| 1564287_at   | LINC00410     | -1.023558963 | 0.641698472 |
| 231378_at    | RP11-231D20.2 | -1.023690128 | 0.664336684 |
| 211445_x_at  | NACAPI        | -1.023719437 | 0.591434465 |
| 1569468_at   | ZNF876P       | -1.023751349 | 0.506136752 |
| 224426_s_at  | ACTR3BP5      | -1.023824608 | 0.623076938 |
| 1562038_at   | RP11-355N15.1 | -1.023860033 | 0.508851226 |
| 1557727_at   | PCBP1-AS1     | -1.023868114 | 0.636967142 |
| 201065_s_at  | GTF2IP1       | -1.023917871 | 0.774635263 |
| 222156_x_at  | DYX1C1-CCPG1  | -1.02397411  | 0.904218737 |
| 1561897_at   | RP11-932O9.4  | -1.023976367 | 0.553639158 |
| 217054_at    | RP11-395B7.2  | -1.02403178  | 0.680339594 |
| 1569276_at   | RP11-394B2.3  | -1.024036679 | 0.6223168   |
| 240101_at    | RP11-390B4.5  | -1.024072614 | 0.771404768 |
| 234058_at    | RP11-515O17.3 | -1.024140918 | 0.531190862 |
| 235466_s_at  | RP11-452F19.3 | -1.024218275 | 0.800335521 |
| 239958_at    | PSMD5-AS1     | -1.024220301 | 0.627681917 |
| 231278_at    | RP13-870H17.3 | -1.024340688 | 0.56534323  |
| 1555196_at   | LINC00421     | -1.024362028 | 0.602322876 |
| 1563867_at   | LOC283194     | -1.024394481 | 0.669016851 |
| 1561003_at   | RP11-298D21.2 | -1.024401428 | 0.565335619 |
| 1557613_at   | KIF9-AS1      | -1.02442983  | 0.479322322 |
| 243639_at    | RP11-505E24.3 | -1.024471954 | 0.601957092 |
| 1562802_at   | LINC00210     | -1.024498313 | 0.576272302 |

|              |                |              |             |
|--------------|----------------|--------------|-------------|
| 1569728_at   | LINC00423      | -1.024556032 | 0.576946594 |
| 1558477_at   | LOC100131496   | -1.024637839 | 0.58843685  |
| 1553450_s_at | LINC00304      | -1.02466733  | 0.48477174  |
| 213363_at    | CA5BP1         | -1.024874904 | 0.769802921 |
| 1564760_at   | RP11-395N3.1   | -1.024880754 | 0.647819788 |
| 1556122_at   | RAB11B-AS1     | -1.02489251  | 0.572660957 |
| 1569722_s_at | PROSER2-AS1    | -1.024896738 | 0.475677126 |
| 236497_at    | LOC729683      | -1.024916023 | 0.561727396 |
| 236731_at    | LRRC2-AS1      | -1.024930096 | 0.617598204 |
| 1565911_at   | RP11-752G15.10 | -1.025040373 | 0.481051156 |
| 1560286_s_at | RP11-1069G10.2 | -1.025063117 | 0.50086363  |
| 236893_at    | HOXB-AS3       | -1.025075126 | 0.641096274 |
| 1553087_at   | C18orf12       | -1.025107641 | 0.550591845 |
| 1569454_a_at | LOC283352      | -1.025146722 | 0.460520296 |
| 239964_at    | TCL6           | -1.025166263 | 0.548711915 |
| 232288_at    | PDXDC2P        | -1.025187272 | 0.774931152 |
| 232452_at    | GCSAML-AS1     | -1.025227612 | 0.503842291 |
| 1557827_at   | DNAJC9-AS1     | -1.025245764 | 0.531355337 |
| 1565554_at   | LINC00628      | -1.025252581 | 0.48111054  |
| 1559611_at   | TMEM75         | -1.025281007 | 0.457442993 |
| 215297_at    | LOC441204      | -1.02532697  | 0.910624247 |
| 1557034_s_at | LOC100288778   | -1.025331006 | 0.788800518 |
| 1562693_at   | RP5-971N18.3   | -1.025470569 | 0.562446281 |
| 1568689_at   | LOC100631378   | -1.025504777 | 0.53581201  |
| 1558661_at   | LOC100506207   | -1.025562997 | 0.615041436 |
| 1560767_at   | HCG22          | -1.025589345 | 0.712500297 |
| 240814_at    | MGC39584       | -1.025624543 | 0.548976637 |
| 236493_at    | NKAPP1         | -1.025652516 | 0.704015131 |
| 1557656_at   | LINC00642      | -1.025710106 | 0.609813638 |
| 239915_at    | HOXA-AS3       | -1.025736111 | 0.606138062 |
| 1558794_at   | NUTM2A-AS1     | -1.025855768 | 0.642899864 |
| 231491_at    | LINC00113      | -1.02589283  | 0.461717442 |
| 220479_at    | CPS1-IT1       | -1.025907805 | 0.552749749 |
| 1563005_at   | RP11-74C13.3   | -1.025941989 | 0.608634282 |
| 230073_at    | LOC100131564   | -1.025941989 | 0.609817854 |
| 238112_at    | LOC283177      | -1.025957584 | 0.559238993 |
| 240810_at    | MKNK1-AS1      | -1.025979459 | 0.550675043 |
| 1564887_at   | RP11-440L14.3  | -1.025996949 | 0.52102823  |
| 1558436_a_at | RP11-521O16.2  | -1.026047736 | 0.604523787 |
| 243499_at    | RP11-1103G16.1 | -1.026072687 | 0.492149587 |
| 232448_at    | LINC00543      | -1.026132504 | 0.664767321 |
| 1558250_s_at | RP11-350F4.2   | -1.026157843 | 0.81146871  |
| 1563845_at   | LOC100507387   | -1.026179085 | 0.703030757 |
| 1558711_at   | FAM13A-AS1     | -1.026328468 | 0.739982013 |
| 1553428_at   | LY86-AS1       | -1.026334808 | 0.798494022 |
| 216659_at    | LOC1720        | -1.026397135 | 0.465645713 |
| 1560911_at   | LOC100133461   | -1.026446725 | 0.572215817 |
| 228247_at    | LOC283788      | -1.026466639 | 0.804987863 |
| 1557399_at   | LOC284009      | -1.026530482 | 0.790899377 |
| 1552819_at   | LINC00205      | -1.026558228 | 0.600796881 |

|              |               |              |             |
|--------------|---------------|--------------|-------------|
| 238422_at    | LBX2-AS1      | -1.026578318 | 0.686199304 |
| 1556744_a_at | RP11-159G9.5  | -1.026692098 | 0.832921738 |
| 1553497_at   | LINC00615     | -1.026729074 | 0.446539658 |
| 1561033_at   | RP11-203B9.4  | -1.026781658 | 0.521794055 |
| 1560707_at   | LOC283856     | -1.026797053 | 0.53356634  |
| 241899_at    | LOC553103     | -1.026808463 | 0.575318686 |
| 1566127_at   | RP13-1039J1.3 | -1.026817979 | 0.555258286 |
| 235667_at    | USP46-AS1     | -1.026865442 | 0.629123785 |
| 1569756_at   | RP11-70F11.8  | -1.026914377 | 0.428337532 |
| 200012_x_at  | RPL21P28      | -1.026916795 | 0.858098519 |
| 1564446_at   | LOC284930     | -1.026925325 | 0.575136884 |
| 241327_at    | RP11-61G23.1  | -1.026931476 | 0.454734989 |
| 238278_at    | LINC00415     | -1.02696316  | 0.582124125 |
| 1556271_at   | RP11-843A23.1 | -1.027044812 | 0.573110672 |
| 242139_s_at  | ERVK3-1       | -1.027064737 | 0.830375435 |
| 1560818_at   | LINC00944     | -1.027143224 | 0.539721847 |
| 1559514_at   | LOC100132077  | -1.027179674 | 0.502888892 |
| 1560526_at   | MAGI2-IT1     | -1.027197145 | 0.869042737 |
| 1559683_at   | RP11-507J18.5 | -1.027289071 | 0.542870203 |
| 214186_s_at  | HCG26         | -1.027350526 | 0.578918594 |
| 1561245_at   | RP11-45K10.2  | -1.027359602 | 0.501593281 |
| 232926_x_at  | ANKRD19P      | -1.027364324 | 0.619230636 |
| 1568892_at   | LOC100996251  | -1.02737607  | 0.585063995 |
| 1563043_at   | LINC00620     | -1.027480668 | 0.472457284 |
| 237909_at    | ADAM6         | -1.027594239 | 0.473604312 |
| 227502_at    | RP5-894A10.2  | -1.027601342 | 0.827210473 |
| 1562916_at   | LINC00102     | -1.027655229 | 0.323867744 |
| 244182_at    | RP1-118J21.25 | -1.027719455 | 0.607754441 |
| 1567027_at   | SH3GL1P2      | -1.02773591  | 0.629338864 |
| 1557146_a_at | SSTR5-AS1     | -1.02777691  | 0.541177121 |
| 1560771_at   | RP11-285A1.1  | -1.027777278 | 0.48770103  |
| 1569936_a_at | RP11-214K3.24 | -1.027830536 | 0.407554904 |
| 240561_at    | RP5-842K24.2  | -1.027833652 | 0.694104435 |
| 1560410_at   | RP11-449L23.2 | -1.02789851  | 0.533615576 |
| 1561279_at   | RP11-231E19.1 | -1.027931211 | 0.515169884 |
| 230373_at    | PRKAG2-AS1    | -1.027937252 | 0.460870242 |
| 244405_s_at  | RP11-753A21.1 | -1.027941589 | 0.391153043 |
| 244831_at    | RP11-945A11.2 | -1.028034317 | 0.405291012 |
| 235928_at    | ZNF503-AS2    | -1.028067584 | 0.640076174 |
| 1559712_at   | LINC00689     | -1.028093978 | 0.911073549 |
| 234281_at    | ESPNP         | -1.028121244 | 0.555203496 |
| 244372_at    | LOC101060019  | -1.028192394 | 0.576989213 |
| 1570445_a_at | LOC643201     | -1.028197429 | 0.781675662 |
| 213329_at    | SRGAP2D       | -1.028354795 | 0.764702051 |
| 233170_at    | LINC00348     | -1.028364305 | 0.374210337 |
| 222226_at    | SAA3P         | -1.02837248  | 0.520130075 |
| 233513_at    | RP11-847H18.2 | -1.028386039 | 0.666226132 |
| 215327_at    | RP11-414H17.5 | -1.028395549 | 0.57615862  |
| 1563800_at   | LOC283140     | -1.028423869 | 0.467826665 |
| 241126_at    | RP11-45L9.1   | -1.028462457 | 0.465203685 |

|              |               |              |             |
|--------------|---------------|--------------|-------------|
| 1563244_at   | RP11-650K20.3 | -1.028469004 | 0.56795054  |
| 237806_s_at  | LOC729296     | -1.028493123 | 0.562816161 |
| 1560038_at   | LOC100506071  | -1.028503409 | 0.49504378  |
| 1562862_at   | RP3-388M5.9   | -1.028537157 | 0.610875737 |
| 1557878_at   | RP11-10K16.1  | -1.028705561 | 0.492784445 |
| 239691_at    | C12orf77      | -1.028718737 | 0.526287867 |
| 225515_s_at  | WAC-AS1       | -1.028749798 | 0.671580936 |
| 1562311_at   | RP11-521H3.3  | -1.028798416 | 0.458023159 |
| 1568722_at   | RP11-1078H9.5 | -1.028837734 | 0.60640548  |
| 1562048_at   | LOC152225     | -1.028883217 | 0.350527727 |
| 230227_at    | RP11-333I13.1 | -1.02888595  | 0.580031677 |
| 215770_at    | OR7E2P        | -1.028977697 | 0.434530106 |
| 237574_at    | RP4-594L9.2   | -1.029079919 | 0.505169202 |
| 221804_s_at  | FAM45B        | -1.029149682 | 0.748202592 |
| 238910_at    | CLUHP3        | -1.029169493 | 0.652109722 |
| 238893_at    | LINC00936     | -1.02917463  | 0.870669931 |
| 232732_at    | LOC100652999  | -1.029183121 | 0.478019165 |
| 1561757_a_at | LOC283352     | -1.029270455 | 0.495741104 |
| 1553432_s_at | LOC653786     | -1.029278617 | 0.487746352 |
| 1553438_at   | C11orf72      | -1.029301261 | 0.399688351 |
| 1560175_at   | PPP4R1L       | -1.029306612 | 0.531115503 |
| 237595_at    | RP11-38C18.2  | -1.029403709 | 0.563471987 |
| 237154_at    | RP1-28O10.1   | -1.029408634 | 0.474942143 |
| 1561482_at   | RSU1P2        | -1.029413733 | 0.522846153 |
| 1570106_at   | RP11-439E19.1 | -1.029456333 | 0.486338729 |
| 241218_at    | RP11-752D24.2 | -1.029456546 | 0.507961963 |
| 233774_at    | RP11-463O9.2  | -1.029490926 | 0.510414133 |
| 1556436_at   | EXTL3-AS1     | -1.029498314 | 0.708494896 |
| 1561420_a_at | Z83844.1      | -1.02955071  | 0.456154965 |
| 243974_at    | RP3-331H24.6  | -1.029562132 | 0.855360114 |
| 1562036_at   | RP11-109G23.3 | -1.029655608 | 0.63984173  |
| 1562661_at   | RP4-564F22.5  | -1.029670541 | 0.496815215 |
| 1561605_at   | RP11-394G3.2  | -1.02973278  | 0.470882856 |
| 208286_x_at  | POU5F1P3      | -1.029811179 | 0.529622675 |
| 244727_at    | KCNQ1OT1      | -1.02982918  | 0.531517455 |
| 234053_at    | RP11-442O18.2 | -1.02983467  | 0.463955797 |
| 235124_at    | EIF3J-AS1     | -1.029871836 | 0.782539784 |
| 1561390_at   | FAM41AY2      | -1.02987492  | 0.579898324 |
| 230310_at    | RP11-464F9.20 | -1.029900992 | 0.688387039 |
| 240534_at    | RP11-38C18.3  | -1.02995108  | 0.528517009 |
| 231106_at    | BMS1P6        | -1.029982799 | 0.784741964 |
| 1557566_at   | LOC100507634  | -1.030076546 | 0.541657853 |
| 236572_at    | RP4-647C14.3  | -1.030077749 | 0.517220367 |
| 1560714_at   | FLJ37035      | -1.030085742 | 0.536468613 |
| 1552401_a_at | GRIK1-AS2     | -1.030088187 | 0.60539319  |
| 1558107_at   | LOC283788     | -1.030093833 | 0.739436356 |
| 224045_x_at  | LINC00470     | -1.030098955 | 0.472537165 |
| 1553912_at   | LINC00955     | -1.030120531 | 0.431286542 |
| 233960_s_at  | LOC115110     | -1.03020255  | 0.569399961 |
| 240427_at    | RP11-73B2.2   | -1.030204529 | 0.402933696 |

|              |                |              |             |
|--------------|----------------|--------------|-------------|
| 1560841_at   | LOC389247      | -1.030227388 | 0.398299198 |
| 1557389_at   | SH3PXD2A-AS1   | -1.030412547 | 0.595632856 |
| 220452_x_at  | CECR7          | -1.030428151 | 0.621889247 |
| 1562068_at   | RP11-371I20.2  | -1.030479391 | 0.534151258 |
| 208266_at    | C8orf17        | -1.03048764  | 0.588508231 |
| 1561702_at   | RP11-753A21.2  | -1.030492861 | 0.435857965 |
| 222801_s_at  | STAG3L4        | -1.03056206  | 0.811995762 |
| 240827_at    | GATA3-AS1      | -1.030563147 | 0.529407276 |
| 236614_at    | LOC729683      | -1.030568349 | 0.481043669 |
| 234097_s_at  | ZNRD1-AS1      | -1.030603853 | 0.282536976 |
| 241552_at    | AA06           | -1.03068659  | 0.385632447 |
| 1561544_at   | RP11-609L23.1  | -1.030747686 | 0.426192093 |
| 238412_at    | RRN3P3         | -1.030771605 | 0.781290247 |
| 240745_at    | RP11-245J24.1  | -1.030825037 | 0.411995452 |
| 1560448_at   | PRR7-AS1       | -1.030831658 | 0.403062278 |
| 1556916_a_at | RP11-2O17.2    | -1.030841153 | 0.513798628 |
| 237793_at    | C20orf78       | -1.030855036 | 0.537998123 |
| 1570345_at   | LINC00474      | -1.030866336 | 0.359444092 |
| 1566555_at   | BAIAP2-AS1     | -1.030913579 | 0.421819297 |
| 1560522_at   | DLGAP1-AS3     | -1.030914336 | 0.511174839 |
| 237563_s_at  | RP11-295G20.2  | -1.030939482 | 0.733418452 |
| 237406_at    | RP11-121A14.3  | -1.031088276 | 0.615183931 |
| 1562930_at   | SRRM2-AS1      | -1.0311096   | 0.476065872 |
| 224456_s_at  | FOXD2-AS1      | -1.031161243 | 0.71795729  |
| 241475_at    | BREA2          | -1.031164021 | 0.470875247 |
| 1559372_at   | RP1-224A6.3    | -1.031213627 | 0.466023414 |
| 1556768_at   | LINC00930      | -1.031220561 | 0.542315714 |
| 1559667_at   | RP11-83N9.5    | -1.031231613 | 0.62093814  |
| 240828_at    | JARID2-AS1     | -1.031502319 | 0.464009612 |
| 231196_x_at  | LINC00202-1    | -1.031542693 | 0.57307783  |
| 231595_at    | MRV11-AS1      | -1.031564766 | 0.440705682 |
| 231637_at    | LOC100499194   | -1.031640293 | 0.427668199 |
| 1556721_at   | C20orf203      | -1.031732966 | 0.674384511 |
| 1554615_at   | RP11-43D4.3    | -1.031836395 | 0.478055967 |
| 1561513_at   | RP11-461F11.3  | -1.031842536 | 0.370614277 |
| 1561322_at   | RP11-165H23.1  | -1.031850641 | 0.315528573 |
| 242889_x_at  | FUT8-AS1       | -1.031886344 | 0.647761519 |
| 1554732_at   | LOC728175      | -1.031942147 | 0.54681766  |
| 1570105_at   | RP5-963E22.5   | -1.03196312  | 0.413059588 |
| 1564109_at   | LOC284865      | -1.032003123 | 0.560259392 |
| 230632_at    | IL10RB-AS1     | -1.032020404 | 0.573034184 |
| 1561728_a_at | LINC00642      | -1.032071082 | 0.384712661 |
| 244175_at    | LINC00577      | -1.032106949 | 0.461159056 |
| 1556274_at   | RP11-480I12.10 | -1.032120168 | 0.534088873 |
| 244540_at    | RP11-24P14.1   | -1.032184596 | 0.433467761 |
| 221206_at    | PMS2CL         | -1.032187629 | 0.660130777 |
| 1569393_at   | MGC15885       | -1.032257077 | 0.429922859 |
| 234457_at    | ZNRD1-AS1      | -1.032279495 | 0.362410116 |
| 240075_at    | RP3-467K16.2   | -1.032297442 | 0.472092443 |
| 1570182_at   | RP11-118E18.4  | -1.03231813  | 0.442090156 |

|              |               |              |             |
|--------------|---------------|--------------|-------------|
| 237075_at    | LOC101060091  | -1.032337555 | 0.43056193  |
| 1560282_at   | RP11-806K15.1 | -1.032424379 | 0.413936385 |
| 1565732_at   | RP1-197B17.3  | -1.032454716 | 0.443796712 |
| 1560630_at   | RP11-109E24.2 | -1.032480153 | 0.453535781 |
| 1568851_at   | RP11-295M18.2 | -1.032494913 | 0.446853722 |
| 1562153_a_at | PVT1          | -1.032498919 | 0.412207859 |
| 233418_at    | LOC91450      | -1.032529511 | 0.395114838 |
| 1561210_at   | RP11-478P10.1 | -1.032544972 | 0.387876989 |
| 238565_at    | RP11-350F4.2  | -1.032595248 | 0.740581464 |
| 1568690_a_at | LOC100631378  | -1.032598632 | 0.473284972 |
| 1560595_at   | LOC100128993  | -1.032617421 | 0.342976106 |
| 215126_at    | RP11-2E17.1   | -1.032622225 | 0.87645009  |
| 238283_at    | LINC00635     | -1.032669762 | 0.402661872 |
| 1563898_at   | RP11-421F16.3 | -1.032689466 | 0.494810275 |
| 237730_at    | LOC100130700  | -1.032690322 | 0.511085647 |
| 1564601_at   | LINC00221     | -1.032767877 | 0.487929301 |
| 240495_at    | RP11-166P13.4 | -1.032771047 | 0.460000468 |
| 238456_at    | LOC100289230  | -1.03277984  | 0.74680821  |
| 1555994_at   | DIAPH3-AS1    | -1.03280723  | 0.434075333 |
| 242972_at    | HCG18         | -1.032872966 | 0.841229103 |
| 1562436_at   | CARS-AS1      | -1.032917946 | 0.441607153 |
| 1559753_at   | RP11-76C10.3  | -1.032971061 | 0.430683663 |
| 1558930_at   | LINC00460     | -1.03298182  | 0.543329397 |
| 233556_at    | CRYBB2P1      | -1.032992813 | 0.476767469 |
| 233775_x_at  | LOC100289333  | -1.033012115 | 0.758116052 |
| 1570082_x_at | RP5-1073O3.7  | -1.033027058 | 0.582506884 |
| 1560988_a_at | LINC00556     | -1.033037215 | 0.34160019  |
| 237460_x_at  | C14orf182     | -1.033044706 | 0.385798283 |
| 1559169_at   | RP1-187B23.1  | -1.033048092 | 0.405192793 |
| 1555988_a_at | LINC00661     | -1.033103705 | 0.435934399 |
| 1560198_at   | LINC00523     | -1.033194135 | 0.439297884 |
| 1563821_at   | LINC00858     | -1.033217624 | 0.473593428 |
| 232703_at    | GLUD1P7       | -1.033309602 | 0.498153176 |
| 1562251_a_at | LOC574538     | -1.033332315 | 0.413658321 |
| 238163_at    | RP11-273B20.1 | -1.033344305 | 0.284690129 |
| 1568974_at   | NHEG1         | -1.033359525 | 0.476476876 |
| 242888_at    | PRRT3-AS1     | -1.033523093 | 0.743229209 |
| 1559333_at   | SRGAP3-AS2    | -1.033545792 | 0.454186808 |
| 1561225_at   | ANKRD30BP3    | -1.033603592 | 0.462937247 |
| 1565424_at   | LINC00529     | -1.033615643 | 0.292644185 |
| 1562365_at   | LOC286177     | -1.033617902 | 0.327369271 |
| 243384_at    | LINC00280     | -1.033628804 | 0.424132718 |
| 1570600_at   | RP13-122B23.8 | -1.033700394 | 0.465331583 |
| 1566831_at   | SBF2-AS1      | -1.033771638 | 0.496023768 |
| 1557208_at   | PROSER2-AS1   | -1.033787722 | 0.5557455   |
| 231135_at    | LOC151174     | -1.033826842 | 0.583158566 |
| 231076_at    | C16orf82      | -1.03385537  | 0.481193671 |
| 1564069_at   | HOTTIP        | -1.033859595 | 0.478211884 |
| 1559528_at   | LOC100129917  | -1.033958622 | 0.734234291 |
| 1564721_at   | RP11-37N22.1  | -1.033990678 | 0.422121987 |

|              |                  |              |             |
|--------------|------------------|--------------|-------------|
| 1557605_a_at | LOC401312        | -1.034014439 | 0.36025346  |
| 1554185_at   | LOC554206        | -1.034036038 | 0.628323682 |
| 234715_at    | GOLGA2P3Y        | -1.034067396 | 0.464174768 |
| 243818_at    | SFTA1P           | -1.034077115 | 0.443749337 |
| 1560207_at   | RAD21-AS1        | -1.034119577 | 0.562725891 |
| 243971_x_at  | LINC00202-2      | -1.034135237 | 0.386967926 |
| 241187_at    | RP11-5N11.2      | -1.034208966 | 0.519077171 |
| 229094_at    | ATP6V0E2-AS1     | -1.034234563 | 0.777534566 |
| 1570465_at   | RP11-153K16.2    | -1.034275278 | 0.426652342 |
| 1557024_at   | RP11-744D14.2    | -1.034306935 | 0.533421109 |
| 1554301_at   | LHFPL3-AS1       | -1.03432404  | 0.360507614 |
| 1554887_at   | RP11-132A1.4     | -1.03436772  | 0.345974109 |
| 220377_at    | KIAA0125         | -1.034428235 | 0.47475871  |
| 1554763_at   | UBE2DNL          | -1.034512546 | 0.432750597 |
| 1557444_at   | TREML3P          | -1.03453287  | 0.531811785 |
| 1560819_a_at | LINC00944        | -1.034557266 | 0.456438561 |
| 244518_at    | LOC100130452     | -1.034604522 | 0.419721521 |
| 228207_at    | LOC100499489     | -1.034622548 | 0.73542002  |
| 1564049_at   | LOC339593        | -1.034644452 | 0.397102031 |
| 1554222_at   | MGC45922         | -1.034677095 | 0.544751909 |
| 1562785_at   | RP11-10L7.1      | -1.034723557 | 0.754582    |
| 1562674_at   | RP11-495P10.5    | -1.034872741 | 0.483031295 |
| 244296_at    | RP11-456O19.2    | -1.034876698 | 0.398435716 |
| 231404_at    | SPTY2D1-AS1      | -1.034913189 | 0.541414871 |
| 1559103_s_at | RP11-73K9.2      | -1.034948004 | 0.752315428 |
| 233338_at    | FAM230C          | -1.034973112 | 0.442981596 |
| 1557498_a_at | RP11-451G4.1     | -1.035056375 | 0.375904833 |
| 215697_at    | RP11-117L5.3     | -1.035112876 | 0.364177526 |
| 227596_at    | FLJ37453         | -1.035126056 | 0.44695655  |
| 237564_at    | RP11-295G20.2    | -1.035250319 | 0.428001515 |
| 1556847_s_at | RP11-1006G14.1   | -1.035271944 | 0.443866471 |
| 239498_at    | RP11-498E2.7     | -1.035299478 | 0.559129654 |
| 1556900_at   | APCDD1L-AS1      | -1.035316209 | 0.392773203 |
| 213356_x_at  | HNRNPA1P10       | -1.035323425 | 0.605772508 |
| 1557484_at   | RP11-634B7.4     | -1.035445293 | 0.447569351 |
| 1553832_at   | LINC00315        | -1.035480282 | 0.284516877 |
| 237249_at    | KCNQ1OT1         | -1.035560056 | 0.480845993 |
| 214410_at    | RP11-348B17.1    | -1.035567487 | 0.425161966 |
| 1563316_at   | NEGR1-IT1        | -1.035592142 | 0.594208014 |
| 242754_at    | RP11-314A20.2    | -1.035596375 | 0.475404628 |
| 1570270_at   | RP11-15K3.1      | -1.035628522 | 0.324828919 |
| 236842_at    | RP11-290H9.4     | -1.035643815 | 0.380394579 |
| 221850_x_at  | BMS1P5           | -1.035669818 | 0.739588502 |
| 233749_at    | RP11-368D24__A.1 | -1.035762346 | 0.361027473 |
| 1562703_at   | LINC00964        | -1.035781309 | 0.451925219 |
| 237523_at    | RP11-66N11.7     | -1.035840756 | 0.411505752 |
| 1562801_at   | RP11-166A12.1    | -1.035843819 | 0.446775863 |
| 229216_s_at  | RP11-567I13.1    | -1.035867427 | 0.597871635 |
| 1556180_at   | LINC00847        | -1.035894684 | 0.659461882 |
| 1570163_at   | EGFLAM-AS4       | -1.035904889 | 0.470231001 |



|              |                |              |             |
|--------------|----------------|--------------|-------------|
| 219839_x_at  | TCL6           | -1.035924479 | 0.524117736 |
| 240361_at    | RP1-232P20.1   | -1.035941006 | 0.428322536 |
| 230548_at    | LOC100505942   | -1.035944967 | 0.527461526 |
| 239506_s_at  | LINC00608      | -1.035988403 | 0.423173715 |
| 1554983_at   | LINC00317      | -1.036022259 | 0.408088376 |
| 1560964_at   | RP11-315F22.1  | -1.036028074 | 0.352515632 |
| 238180_at    | RP11-395B7.4   | -1.036086384 | 0.405537435 |
| 1555554_at   | BPIFA4P        | -1.036305524 | 0.528649091 |
| 1557330_at   | RP11-236J17.3  | -1.036458528 | 0.435139129 |
| 1569426_at   | LOC100996342   | -1.036472428 | 0.392699091 |
| 232462_s_at  | A1BG-AS1       | -1.036514637 | 0.497872096 |
| 244366_at    | LOC100506371   | -1.036585294 | 0.45875158  |
| 1562103_at   | RP11-182I10.3  | -1.03661257  | 0.577237206 |
| 216726_at    | VENTXP1        | -1.03663274  | 0.48441566  |
| 244105_at    | WHAMMP3        | -1.036856097 | 0.480528657 |
| 240273_at    | RP11-39H13.1   | -1.036859397 | 0.444388995 |
| 1558685_a_at | LOC158960      | -1.03691461  | 0.562144458 |
| 238522_at    | RP11-137L10.6  | -1.036914961 | 0.447121    |
| 1563265_at   | RP5-881L22.4   | -1.036922871 | 0.380657657 |
| 240049_at    | RP13-39P12.3   | -1.037045592 | 0.30819958  |
| 1562871_at   | AOX2P          | -1.037053542 | 0.469482098 |
| 1555188_at   | MTUS2-AS1      | -1.037085929 | 0.395023157 |
| 240009_at    | LINC00334      | -1.037107787 | 0.321152888 |
| 1567036_at   | C20orf181      | -1.037133397 | 0.430486805 |
| 240999_at    | LOC100287704   | -1.0371728   | 0.285332367 |
| 216063_at    | HBBP1          | -1.037218319 | 0.522671612 |
| 1562730_a_at | RP11-893F2.14  | -1.037274781 | 0.693530572 |
| 222090_at    | NDUFB2-AS1     | -1.037321263 | 0.62655311  |
| 224289_s_at  | VN1R10P        | -1.037350981 | 0.255272385 |
| 1563241_at   | RP11-20B24.5   | -1.037360751 | 0.337902722 |
| 236657_at    | LOC100288911   | -1.037405653 | 0.715194261 |
| 235161_at    | RASSF8-AS1     | -1.037437503 | 0.639345292 |
| 239926_at    | RP11-727A23.11 | -1.037438793 | 0.7940438   |
| 237888_at    | LOC100422737   | -1.037451202 | 0.311385936 |
| 1561288_at   | LINC00536      | -1.037590636 | 0.404889951 |
| 1563568_at   | LINC00559      | -1.037604394 | 0.39032212  |
| 1569741_at   | RP11-653G8.2   | -1.03760758  | 0.294071762 |
| 220718_at    | HEXA-AS1       | -1.037644929 | 0.501456037 |
| 239869_at    | RP11-610P16.1  | -1.037647665 | 0.481267379 |
| 240692_at    | MGC34796       | -1.037661542 | 0.299861476 |
| 237749_at    | RP11-619L19.1  | -1.037741855 | 0.320283919 |
| 1561556_at   | RP11-135J2.3   | -1.037750221 | 0.371864819 |
| 228675_at    | USP30-AS1      | -1.037839689 | 0.33684661  |
| 1570297_at   | WI2-89031B12.1 | -1.037883674 | 0.410941474 |
| 238664_s_at  | MGC12916       | -1.037911903 | 0.488986602 |
| 207280_at    | RNF185-AS1     | -1.037963066 | 0.334110258 |
| 1552955_at   | LINC00208      | -1.037999841 | 0.429065087 |
| 1569849_at   | RP1-297M16.2   | -1.038039218 | 0.420894565 |
| 231589_at    | RP5-937E21.8   | -1.038082488 | 0.318277399 |
| 232839_at    | STK24-AS1      | -1.038104387 | 0.479395714 |

|              |                 |              |             |
|--------------|-----------------|--------------|-------------|
| 1561490_at   | NPSR1-AS1       | -1.03810775  | 0.529189843 |
| 244179_x_at  | GGT3P           | -1.03813405  | 0.402464555 |
| 213788_s_at  | LINC00094       | -1.038142438 | 0.824605037 |
| 211461_at    | CSPG4P1Y        | -1.038161601 | 0.390645161 |
| 226362_at    | RP11-846E15.2   | -1.038172982 | 0.761464345 |
| 227887_at    | FOXN3-AS1       | -1.038180041 | 0.435494515 |
| 1564122_at   | LINC00514       | -1.038201356 | 0.379038886 |
| 1564263_at   | LINC00330       | -1.038288419 | 0.469817667 |
| 223779_at    | AFAP1-AS1       | -1.038365377 | 0.348364698 |
| 1560827_at   | RP11-30K9.6     | -1.038410401 | 0.664439681 |
| 81737_at     | LOC100505915    | -1.038426713 | 0.697438507 |
| 1561678_at   | RP5-1069C8.2    | -1.038459691 | 0.293147558 |
| 1561411_at   | RP11-16L9.3     | -1.038472757 | 0.336026456 |
| 236803_at    | RP11-156P1.3    | -1.038498147 | 0.58066074  |
| 240754_at    | LOC284933       | -1.03856131  | 0.350534828 |
| 211933_s_at  | HNRNPA3P1       | -1.038612035 | 0.676569518 |
| 1563171_at   | RP11-466A17.1   | -1.038624849 | 0.399606918 |
| 230374_at    | RP11-783K16.13  | -1.038650829 | 0.510556711 |
| 1554286_at   | FLJ25758        | -1.03866734  | 0.363175823 |
| 231232_at    | LOC100506125    | -1.03872036  | 0.62096703  |
| 1553811_at   | FAM222A-AS1     | -1.03874057  | 0.370503064 |
| 232248_at    | LOC100652768    | -1.038742683 | 0.279348609 |
| 235788_at    | HCG18           | -1.03896401  | 0.661338718 |
| 220445_s_at  | CSAG3           | -1.03896808  | 0.420273333 |
| 1562850_at   | RP11-3B12.2     | -1.038976378 | 0.207554817 |
| 1562107_at   | XXyac-YR29IB3.1 | -1.039066559 | 0.262806265 |
| 232281_at    | LINC00662       | -1.039123317 | 0.796160594 |
| 1560698_a_at | TRHDE-AS1       | -1.039196051 | 0.756389875 |
| 244718_at    | MTMR9LP         | -1.039446097 | 0.451206126 |
| 244381_at    | RP11-385F5.4    | -1.039454477 | 0.596152488 |
| 1561408_at   | RP11-167H9.3    | -1.03945618  | 0.37487457  |
| 1554782_at   | KLHL30-AS1      | -1.039458294 | 0.47301452  |
| 1564112_at   | RP11-338C15.5   | -1.039482396 | 0.338840082 |
| 221093_at    | BRD7P3          | -1.039572915 | 0.313476602 |
| 1556945_a_at | RP11-144L1.4    | -1.039575832 | 0.276173521 |
| 231679_at    | RP11-161I6.2    | -1.039582979 | 0.516641613 |
| 217380_s_at  | ADD3-AS1        | -1.039595081 | 0.632217788 |
| 237682_at    | RP11-742B18.1   | -1.039638141 | 0.304400892 |
| 231627_at    | LINC00919       | -1.039666966 | 0.339385605 |
| 227298_at    | TRAM2-AS1       | -1.039667456 | 0.658823569 |
| 225225_at    | OIP5-AS1        | -1.0396851   | 0.759917952 |
| 232230_at    | LINC00263       | -1.039694989 | 0.797469684 |
| 1563904_at   | LOC100129620    | -1.039723875 | 0.397498695 |
| 1562081_a_at | LINC00424       | -1.039776556 | 0.305394303 |
| 1562671_s_at | RP11-862G15.1   | -1.039811085 | 0.372754774 |
| 1555839_a_at | C3orf79         | -1.039863301 | 0.166091113 |
| 1561271_at   | CCDC144CP       | -1.039916773 | 0.694273324 |
| 1564200_at   | LINC00607       | -1.039922571 | 0.383422341 |
| 240002_at    | LINC00937       | -1.040014205 | 0.525311964 |
| 1557207_s_at | LOC283177       | -1.040043785 | 0.535322172 |

|              |               |              |             |
|--------------|---------------|--------------|-------------|
| 233062_at    | RP1-80B9.2    | -1.040044099 | 0.272661561 |
| 239565_at    | DLG5-AS1      | -1.040115388 | 0.307229275 |
| 242663_at    | LINC00662     | -1.040134921 | 0.735105302 |
| 1557896_at   | RP11-495P10.3 | -1.040163133 | 0.351825498 |
| 1557488_at   | CBX3P2        | -1.040208646 | 0.518547854 |
| 233934_at    | LOC349160     | -1.04028657  | 0.3244976   |
| 229643_at    | AC078883.4    | -1.040368321 | 0.296039726 |
| 1568871_at   | CADM2-AS1     | -1.040401478 | 0.402623683 |
| 233371_at    | ABCC13        | -1.040458387 | 0.431682564 |
| 1557068_at   | LOC100505782  | -1.040467677 | 0.239720107 |
| 240431_at    | LINC00459     | -1.040497054 | 0.315652313 |
| 242017_at    | RP11-159G9.5  | -1.040502404 | 0.610812634 |
| 243332_at    | RP11-124L9.5  | -1.040535977 | 0.824556388 |
| 1561185_at   | TTY7          | -1.040545639 | 0.260735922 |
| 211350_s_at  | KIF25-AS1     | -1.040585525 | 0.432611864 |
| 223757_at    | DIO3OS        | -1.040588171 | 0.456179242 |
| 224006_at    | LOC100507377  | -1.040660556 | 0.51329858  |
| 225391_at    | LOC93622      | -1.04066873  | 0.684996645 |
| 236398_s_at  | RP11-443B7.1  | -1.040718342 | 0.411694241 |
| 240919_at    | RP11-536G4.2  | -1.04072587  | 0.450195439 |
| 232718_at    | LINC00589     | -1.040799676 | 0.428770884 |
| 1567242_at   | OR2L1P        | -1.040824103 | 0.443234244 |
| 1564670_at   | RAMP2-AS1     | -1.040883565 | 0.454338673 |
| 242313_at    | LOC728730     | -1.040933169 | 0.598333043 |
| 237808_at    | ST7-AS2       | -1.040971892 | 0.625170067 |
| 234012_at    | RP11-174G17.3 | -1.040985441 | 0.596357938 |
| 1556944_at   | RP11-144L1.4  | -1.041015735 | 0.370206105 |
| 239262_at    | RP11-736K20.4 | -1.041134272 | 0.83498532  |
| 220583_at    | RP11-864N7.4  | -1.041184574 | 0.258702147 |
| 1561530_at   | RP11-365O16.6 | -1.04120344  | 0.487651538 |
| 237331_s_at  | MAPT-AS1      | -1.041250117 | 0.313696583 |
| 1557296_at   | FLJ12825      | -1.041257727 | 0.467099923 |
| 243784_s_at  | LOC100272217  | -1.04126363  | 0.520935269 |
| 1556518_at   | DLG1-AS1      | -1.041307073 | 0.402286025 |
| 1569127_at   | RP11-876N24.5 | -1.041353813 | 0.489559619 |
| 1563074_at   | LOC255654     | -1.04136262  | 0.398486217 |
| 1558764_at   | RP3-496C20.1  | -1.041386805 | 0.258891043 |
| 240185_at    | LOC100147773  | -1.041402066 | 0.589968396 |
| 232586_x_at  | LOC100133315  | -1.041551036 | 0.771320384 |
| 1569365_a_at | KIAA1656      | -1.041605831 | 0.396961823 |
| 235532_at    | RP11-226L15.5 | -1.041606537 | 0.665840269 |
| 1565729_at   | RP13-436F16.1 | -1.041627687 | 0.286783257 |
| 1563013_at   | LOC646522     | -1.041671616 | 0.380193631 |
| 1562803_at   | LRRC37A5P     | -1.041675599 | 0.24844917  |
| 1561305_at   | RP11-24I21.1  | -1.041811519 | 0.428613297 |
| 1553020_at   | SMCR5         | -1.041822135 | 0.672835172 |
| 241317_at    | RP11-701I24.3 | -1.041840326 | 0.349626194 |
| 1562000_at   | LOC400620     | -1.041868741 | 0.46892119  |
| 1569789_at   | RP11-260O18.1 | -1.041882145 | 0.366102415 |
| 1566884_at   | RP11-45M22.3  | -1.041946809 | 0.225060539 |

|              |                |              |             |
|--------------|----------------|--------------|-------------|
| 243749_s_at  | LOC100507316   | -1.041951382 | 0.464544549 |
| 1562717_at   | LINC00299      | -1.042025059 | 0.247586251 |
| 1561454_at   | RP11-576E20.1  | -1.042033734 | 0.302254301 |
| 239182_at    | HOXD-AS1       | -1.042049515 | 0.297894879 |
| 1557723_at   | LOC285847      | -1.04205399  | 0.336277739 |
| 1557060_at   | RP11-522D2.1   | -1.042146656 | 0.370914793 |
| 1569878_at   | CCNYL2         | -1.042172783 | 0.6911106   |
| 1562760_at   | RP11-19D2.2    | -1.042230065 | 0.289957827 |
| 240151_at    | HOXB-AS3       | -1.042232892 | 0.528711344 |
| 1557879_at   | LOC100129175   | -1.042274451 | 0.347501001 |
| 229754_at    | TMEM44-AS1     | -1.042288351 | 0.703185656 |
| 213972_at    | RP11-79P5.2    | -1.042324396 | 0.382987631 |
| 1558493_at   | CST13P         | -1.042453724 | 0.220135807 |
| 244604_at    | RP11-250B2.3   | -1.042466939 | 0.64856824  |
| 1554927_at   | LINC00598      | -1.042657734 | 0.360820095 |
| 1553226_at   | LINC00052      | -1.042715376 | 0.271316779 |
| 1569858_at   | RP11-171A24.2  | -1.042789009 | 0.37124045  |
| 1556796_at   | KRBOX1-AS1     | -1.042827075 | 0.399198172 |
| 227547_at    | RP5-1085F17.3  | -1.042840962 | 0.679026561 |
| 240897_at    | RP11-443C10.1  | -1.042870171 | 0.315173079 |
| 243263_at    | LINC00482      | -1.04289227  | 0.438567687 |
| 1560520_at   | LOC401312      | -1.042918985 | 0.267737869 |
| 1559324_at   | USP32P2        | -1.042997112 | 0.39454824  |
| 1563039_at   | LARGE-AS1      | -1.043002927 | 0.204861524 |
| 1568749_at   | RP11-716O23.1  | -1.043020726 | 0.373731886 |
| 237236_x_at  | LINC00202-2    | -1.043113282 | 0.308846183 |
| 1553590_at   | FAM27E2        | -1.043140494 | 0.352219219 |
| 237494_at    | RP11-548M13.1  | -1.043214786 | 0.400483568 |
| 230245_s_at  | LINC00926      | -1.04321626  | 0.647184377 |
| 1564439_a_at | MRGPRG-AS1     | -1.043219463 | 0.255708747 |
| 1569193_at   | RP11-439E19.10 | -1.043243475 | 0.529926185 |
| 1558449_at   | RP11-421E14.2  | -1.043257171 | 0.281505686 |
| 231652_at    | RP6-91H8.2     | -1.043352558 | 0.310540208 |
| 244832_at    | RP11-752L20.3  | -1.043352951 | 0.767405424 |
| 237529_at    | LINC00708      | -1.043410179 | 0.228448699 |
| 1558011_at   | LOC441081      | -1.043410612 | 0.672922509 |
| 1557631_at   | RP11-386B13.3  | -1.043445438 | 0.201251759 |
| 241161_at    | RP11-104J23.2  | -1.043462851 | 0.472549081 |
| 1563116_at   | RP11-240A16.1  | -1.043477238 | 0.322420002 |
| 1562716_at   | LOC284632      | -1.043544065 | 0.312798838 |
| 231529_at    | MEG3           | -1.043644511 | 0.433747856 |
| 1561253_at   | RP11-43N5.1    | -1.043691434 | 0.299619302 |
| 1564491_at   | SPANXA2-OT1    | -1.043771251 | 0.186101815 |
| 229761_at    | LOC440173      | -1.043931276 | 0.438486801 |
| 216718_at    | LINC00302      | -1.043936467 | 0.231462693 |
| 1563002_at   | RP11-359K18.3  | -1.043998977 | 0.316735913 |
| 1557875_at   | RP11-879D6.1   | -1.04416535  | 0.314565896 |
| 1553484_at   | LINC00477      | -1.044216703 | 0.335648754 |
| 234866_s_at  | ZNRD1-AS1      | -1.044261764 | 0.181798825 |
| 243503_at    | RP11-676J12.6  | -1.044270026 | 0.34834865  |

|              |                |              |             |
|--------------|----------------|--------------|-------------|
| 1569418_at   | LINC00682      | -1.044296934 | 0.398969502 |
| 220399_at    | LINC00115      | -1.044300494 | 0.770316949 |
| 1557657_a_at | LINC00642      | -1.044313083 | 0.336879257 |
| 235406_x_at  | TMEM161B-AS1   | -1.044514761 | 0.658622676 |
| 1557742_a_at | LOC100128176   | -1.044570912 | 0.138664417 |
| 1563254_a_at | FAM170B-AS1    | -1.044614218 | 0.161564182 |
| 1561573_at   | RP11-127O4.3   | -1.044710535 | 0.143018501 |
| 1554715_at   | LINC00593      | -1.044830379 | 0.24377778  |
| 216998_s_at  | ADAM5          | -1.044889775 | 0.422925054 |
| 1557431_at   | RP4-561L24.3   | -1.044897234 | 0.45585959  |
| 231138_at    | TRPC5OS        | -1.04510186  | 0.347807471 |
| 1569859_at   | SUCLA2-AS1     | -1.045137884 | 0.390245722 |
| 215003_at    | DGCR9          | -1.045160798 | 0.593616264 |
| 1560472_at   | LINC00705      | -1.04516635  | 0.345547462 |
| 1563127_at   | RP4-764O22.2   | -1.045201156 | 0.204592487 |
| 1570235_at   | MGC27382       | -1.045230844 | 0.223327914 |
| 220263_at    | SMAD5-AS1      | -1.045302647 | 0.314464712 |
| 239814_at    | LOC100506860   | -1.045326766 | 0.3550367   |
| 78047_s_at   | MMP24-AS1      | -1.045371363 | 0.513019004 |
| 227567_at    | LINC00674      | -1.04544796  | 0.622986754 |
| 240380_at    | LOC728040      | -1.045451839 | 0.384345807 |
| 240598_at    | RP11-1151B14.3 | -1.045566904 | 0.387148667 |
| 1559441_s_at | FLJ38576       | -1.045577617 | 0.343807782 |
| 239455_at    | RP11-396F22.1  | -1.045649759 | 0.393496001 |
| 1564449_at   | USP2-AS1       | -1.045713968 | 0.248889261 |
| 1552605_s_at | LINC00308      | -1.045759113 | 0.264421408 |
| 230460_at    | MYLK-AS1       | -1.045794845 | 0.302885873 |
| 208073_x_at  | TTC3P1         | -1.046016413 | 0.681931398 |
| 1563086_at   | RP11-702F3.3   | -1.046158515 | 0.298186387 |
| 1562737_at   | RP11-422J15.1  | -1.046167422 | 0.223149194 |
| 1568746_a_at | LOC646268      | -1.04617627  | 0.276285924 |
| 224245_at    | INGX           | -1.046265716 | 0.329055749 |
| 1561562_at   | RP11-303E16.7  | -1.046315536 | 0.192469209 |
| 240523_at    | DPH6-AS1       | -1.046348272 | 0.640210236 |
| 228691_at    | RP11-843B15.2  | -1.046360235 | 0.30692615  |
| 1557590_at   | PARD6G-AS1     | -1.046380239 | 0.305025953 |
| 1561055_at   | LOC100507534   | -1.046480425 | 0.542233589 |
| 1562812_at   | ZNF32-AS3      | -1.046646642 | 0.364998159 |
| 233826_at    | RP11-410E4.1   | -1.046662039 | 0.350952444 |
| 1556558_s_at | ENTPD3-AS1     | -1.046777059 | 0.534655753 |
| 1561340_at   | RP11-257I14.1  | -1.046796165 | 0.225246724 |
| 1559605_a_at | LOC285043      | -1.046808409 | 0.196383847 |
| 235173_at    | MBNL1-AS1      | -1.046885782 | 0.487783939 |
| 237339_at    | RP11-20F24.4   | -1.046887951 | 0.254153994 |
| 233590_at    | LOC100506457   | -1.046928119 | 0.195928266 |
| 1561455_at   | LOC284294      | -1.046953833 | 0.328792122 |
| 224418_x_at  | PMCHL1         | -1.047033702 | 0.295237814 |
| 240902_at    | LINC00641      | -1.047067761 | 0.420175768 |
| 217494_s_at  | PTENP1         | -1.047153378 | 0.416628008 |
| 1560542_at   | MCM3AP-AS1     | -1.047169749 | 0.235705206 |

|              |               |              |             |
|--------------|---------------|--------------|-------------|
| 1562928_at   | RP11-20F18.1  | -1.047225629 | 0.273626256 |
| 1566222_at   | RP11-264J4.10 | -1.047321793 | 0.271507977 |
| 1553478_at   | KIRREL3-AS3   | -1.047331755 | 0.452886327 |
| 231344_at    | RP11-102C16.3 | -1.047448565 | 0.238341031 |
| 1566586_at   | RP11-397A16.3 | -1.047451209 | 0.212214244 |
| 242822_at    | MGC39584      | -1.047453399 | 0.40848817  |
| 242350_s_at  | ST8SIA6-AS1   | -1.047461665 | 0.362848611 |
| 239305_at    | RP13-638C3.2  | -1.047566789 | 0.16079508  |
| 234171_at    | RP11-536I6.1  | -1.047675298 | 0.294317733 |
| 1559884_at   | CDKN2B-AS1    | -1.047796134 | 0.365744441 |
| 1556994_at   | RP11-1078H9.6 | -1.04790964  | 0.289675008 |
| 222659_at    | IPO11-LRRC70  | -1.047961138 | 0.643979493 |
| 230470_at    | DSCR9         | -1.047967375 | 0.301057858 |
| 1561373_at   | PACRG-AS1     | -1.04804896  | 0.357326431 |
| 242902_at    | CYMP          | -1.048136315 | 0.268763859 |
| 227649_s_at  | SRGAP2D       | -1.048156591 | 0.559369455 |
| 210905_x_at  | POU5F1P4      | -1.048164488 | 0.393667362 |
| 1566917_at   | HPYR1         | -1.048193056 | 0.249964416 |
| 1559538_at   | RP11-234B24.2 | -1.048253669 | 0.266557642 |
| 232502_at    | ENTPD1-AS1    | -1.048300129 | 0.528090219 |
| 233075_at    | HERC2P7       | -1.048351389 | 0.287001913 |
| 239362_at    | NAPA-AS1      | -1.048436538 | 0.216919114 |
| 233321_x_at  | LOC90834      | -1.048476825 | 0.31039139  |
| 221072_at    | GSN-AS1       | -1.048514131 | 0.335039708 |
| 232822_x_at  | LINC00629     | -1.0485528   | 0.290904358 |
| 1569807_at   | RP11-63B19.1  | -1.048556079 | 0.272219474 |
| 241233_x_at  | ANKRD20A11P   | -1.048566566 | 0.613178325 |
| 213502_x_at  | GUSBP11       | -1.048686556 | 0.607827473 |
| 212700_x_at  | PLEKHM1P      | -1.04868784  | 0.247431122 |
| 1562527_at   | LOC441666     | -1.048723376 | 0.481955281 |
| 1566236_at   | DGCR12        | -1.048791487 | 0.357018859 |
| 1559298_a_at | SPATA41       | -1.048861895 | 0.169249775 |
| 240212_at    | RP11-10K16.1  | -1.048919801 | 0.392990773 |
| 1553871_at   | CSNK1G2-AS1   | -1.048955186 | 0.241370201 |
| 1557550_at   | LINC00906     | -1.048957616 | 0.435704082 |
| 1556859_a_at | LOC285740     | -1.049031097 | 0.209980903 |
| 239640_at    | LOC401320     | -1.049118792 | 0.59206106  |
| 1554302_s_at | LHFPL3-AS1    | -1.049128751 | 0.379384129 |
| 1557493_x_at | LOC100240728  | -1.049128751 | 0.379782288 |
| 1564474_at   | ZBED3-AS1     | -1.049143038 | 0.667862136 |
| 1553918_at   | LINC00479     | -1.049201375 | 0.30783556  |
| 1555868_at   | LOC100507477  | -1.049494411 | 0.523313717 |
| 236271_at    | RP11-363E6.3  | -1.049498542 | 0.687977559 |
| 240842_at    | RP3-417L20.4  | -1.049506015 | 0.315947842 |
| 240012_at    | RP11-53B5.1   | -1.049522758 | 0.259704109 |
| 1569615_at   | RP11-220I1.5  | -1.0495346   | 0.193292979 |
| 230452_at    | FLJ42351      | -1.049728705 | 0.428355357 |
| 241095_at    | RP11-147C23.1 | -1.049761389 | 0.263451846 |
| 216062_at    | RP1-68D18.4   | -1.04977614  | 0.299446959 |
| 1560463_at   | LOC283788     | -1.04988021  | 0.195691309 |

|              |                 |              |             |
|--------------|-----------------|--------------|-------------|
| 236854_at    | LINC00494       | -1.050020227 | 0.312696131 |
| 1563632_at   | TMEM72-AS1      | -1.050056856 | 0.293833914 |
| 1561531_at   | PLCH1-AS1       | -1.05011645  | 0.265058684 |
| 234177_at    | RP1-256G22.2    | -1.050250227 | 0.304410475 |
| 1561891_at   | RP11-50C13.2    | -1.05027173  | 0.285826692 |
| 240589_at    | LINC00313       | -1.05030542  | 0.132776732 |
| 231691_at    | C3P1            | -1.050315787 | 0.318445276 |
| 1556696_s_at | NR2F1-AS1       | -1.05045503  | 0.641206034 |
| 238069_at    | RP11-98I9.4     | -1.050579016 | 0.729067824 |
| 1559170_at   | ANKRD20A5P      | -1.050581054 | 0.463639867 |
| 1556737_at   | LINC00671       | -1.050653125 | 0.354394865 |
| 1557402_at   | RP1-265C24.8    | -1.050662763 | 0.501792014 |
| 231613_at    | RP11-322F10.2   | -1.050694724 | 0.332905686 |
| 1560533_at   | RP11-313A24.1   | -1.050751643 | 0.150349901 |
| 233804_at    | LINC00544       | -1.050774304 | 0.2585272   |
| 1559715_at   | LOC100507391    | -1.050787327 | 0.086431717 |
| 1557779_at   | RP11-346D6.6    | -1.050851713 | 0.362660061 |
| 1562927_at   | RP11-152L20.3   | -1.050903296 | 0.192786799 |
| 1556801_at   | LOC400794       | -1.051010388 | 0.272065827 |
| 229385_s_at  | TINCR           | -1.051056139 | 0.576792586 |
| 238511_at    | UBL7-AS1        | -1.051167266 | 0.550629399 |
| 228493_at    | RP3-327A19.5    | -1.051229873 | 0.693876521 |
| 1570397_x_at | FAM66C          | -1.051262723 | 0.656889505 |
| 207288_at    | ASMTL-AS1       | -1.051447978 | 0.265542254 |
| 221714_s_at  | RRN3P1          | -1.051451603 | 0.29851382  |
| 1568683_at   | SNAI3-AS1       | -1.051454969 | 0.441450414 |
| 1561514_at   | LOC400655       | -1.051493886 | 0.203291035 |
| 1563042_at   | LOC338694       | -1.051494382 | 0.19538412  |
| 1561102_at   | RP11-756K15.2   | -1.051601832 | 0.201831594 |
| 1557451_at   | DGCR10          | -1.051604862 | 0.351198966 |
| 244152_at    | IQCJ-SCHIP1-AS1 | -1.05172411  | 0.279141675 |
| 1561348_at   | LOC339874       | -1.051922484 | 0.312805491 |
| 1562747_at   | RP11-350G8.5    | -1.051941347 | 0.303047056 |
| 215192_at    | PMS2P4          | -1.051954781 | 0.654068936 |
| 1557022_at   | RP11-179A16.1   | -1.05198369  | 0.258906519 |
| 1552895_a_at | ANKRD30BP2      | -1.052068302 | 0.40109761  |
| 231808_at    | OIP5-AS1        | -1.052133678 | 0.635529613 |
| 206478_at    | KIAA0125        | -1.052165228 | 0.286345005 |
| 223783_s_at  | DBIL5P          | -1.05226686  | 0.354949006 |
| 1557287_at   | RP11-557H15.3   | -1.052304598 | 0.183447304 |
| 243576_at    | RP11-288L9.1    | -1.052321762 | 0.23222519  |
| 243699_at    | LOC100507006    | -1.052463928 | 0.383461254 |
| 237047_at    | FAM230C         | -1.052606391 | 0.241286531 |
| 243820_at    | LOC401463       | -1.052612637 | 0.318965764 |
| 224195_at    | TTY12           | -1.052849848 | 0.330673851 |
| 232318_s_at  | LINC00284       | -1.052858256 | 0.20409558  |
| 242682_at    | SOS1-IT1        | -1.05304532  | 0.475080931 |
| 1569819_at   | PWRN1           | -1.053069162 | 0.137226094 |
| 227909_at    | LINC00087       | -1.053133052 | 0.807498955 |
| 1553436_at   | MUC19           | -1.053325562 | 0.27993469  |

|              |                |              |             |
|--------------|----------------|--------------|-------------|
| 1559220_at   | RP5-1157M23.2  | -1.053326673 | 0.288779791 |
| 1562655_at   | Z99756.1       | -1.053393595 | 0.258009254 |
| 1559048_at   | RP11-1055B8.6  | -1.053558488 | 0.263384779 |
| 224490_s_at  | RP11-798G7.6   | -1.053584683 | 0.774951208 |
| 224425_x_at  | ACTR3BP2       | -1.053758518 | 0.191237828 |
| 238096_at    | LOC284023      | -1.053815325 | 0.506959248 |
| 235267_at    | MAGI2-AS3      | -1.053848831 | 0.748738588 |
| 1560378_at   | GRIK1-AS2      | -1.053933752 | 0.222824079 |
| 244829_at    | LINC00518      | -1.053936015 | 0.223866506 |
| 1569983_at   | LINC00566      | -1.054032835 | 0.238939942 |
| 1556917_a_at | RP11-2O17.2    | -1.054092337 | 0.145354893 |
| 1553756_at   | GLIS3-AS1      | -1.054116837 | 0.354247987 |
| 1561244_at   | RP11-112L7.1   | -1.054149558 | 0.114985907 |
| 1561423_at   | LINC00535      | -1.054171281 | 0.23001074  |
| 1566235_at   | DGCR12         | -1.054213336 | 0.250168682 |
| 231105_at    | RP11-399E6.1   | -1.054335422 | 0.284612085 |
| 1561280_at   | LEMD1-AS1      | -1.054354705 | 0.156371784 |
| 1567624_at   | TREML5P        | -1.054488426 | 0.282634857 |
| 243419_at    | LOC654342      | -1.054494822 | 0.176509954 |
| 1561249_a_at | DNM1P35        | -1.054507375 | 0.167863004 |
| 244880_at    | RP11-1260E13.2 | -1.054546206 | 0.162831692 |
| 239894_at    | NEBL-AS1       | -1.054718054 | 0.392949067 |
| 1569647_at   | LOC643623      | -1.054797621 | 0.304754114 |
| 1569646_a_at | KIRREL3-AS2    | -1.054827125 | 0.296480063 |
| 1557046_x_at | LINC00665      | -1.054837953 | 0.618176532 |
| 216099_at    | HTR7P1         | -1.054884745 | 0.22548383  |
| 1561333_at   | RP11-753D20.4  | -1.054910237 | 0.24840015  |
| 1560278_at   | LOC221122      | -1.054952501 | 0.184562807 |
| 221965_at    | RP11-546D6.3   | -1.054962297 | 0.637916507 |
| 240225_at    | EGFLAM-AS2     | -1.055012254 | 0.164267604 |
| 230975_at    | RP11-109E10.1  | -1.055021633 | 0.202848933 |
| 1566720_at   | RPS10P7        | -1.055033199 | 0.503726184 |
| 1554089_s_at | SBDSP1         | -1.05510168  | 0.643440489 |
| 1559321_at   | RP11-434D9.1   | -1.055203775 | 0.215299352 |
| 1556249_a_at | EIF1B-AS1      | -1.055321542 | 0.184879185 |
| 237942_at    | SNRK-AS1       | -1.055454134 | 0.669785047 |
| 1569416_at   | RP11-499E14.1  | -1.05548467  | 0.205255164 |
| 1559950_at   | FAM66D         | -1.05551312  | 0.469493349 |
| 1554057_at   | ASH1L-AS1      | -1.055515326 | 0.561377461 |
| 217667_at    | SEC14L1P1      | -1.055524452 | 0.619128985 |
| 1552582_at   | ABCC13         | -1.055608533 | 0.181664852 |
| 1569234_at   | RP11-209D14.2  | -1.055674109 | 0.274292283 |
| 239119_at    | DNAJC3-AS1     | -1.055677808 | 0.326829974 |
| 206808_at    | HNRNPA3P1      | -1.055703857 | 0.207468092 |
| 1560932_at   | FLJ31356       | -1.055868813 | 0.187206948 |
| 242643_x_at  | RP11-177N22.3  | -1.055890372 | 0.182634187 |
| 244707_at    | RP11-272D12.1  | -1.055909525 | 0.328591196 |
| 1552583_s_at | ABCC13         | -1.055965015 | 0.245340012 |
| 1556887_at   | NPHP3-AS1      | -1.056038967 | 0.236182335 |
| 216908_x_at  | RRN3P1         | -1.056067313 | 0.587752881 |



|              |               |              |             |
|--------------|---------------|--------------|-------------|
| 241587_at    | NAALADL2-AS3  | -1.056146603 | 0.102882813 |
| 1568853_at   | RP11-98D18.9  | -1.056193711 | 0.390466221 |
| 222198_at    | RP11-930P14.2 | -1.056206264 | 0.127761802 |
| 1560772_a_at | RP11-285A1.1  | -1.056272793 | 0.214557551 |
| 230439_at    | RBAKDN        | -1.056316842 | 0.25886497  |
| 1570065_at   | C22orf34      | -1.056374861 | 0.359171119 |
| 236709_at    | RP11-2E17.1   | -1.056445838 | 0.452152659 |
| 237287_at    | HMGA1P4       | -1.056466652 | 0.362107797 |
| 1562475_at   | TEX41         | -1.056504998 | 0.217269085 |
| 220695_at    | RP11-81A1.7   | -1.056641002 | 0.329572013 |
| 229363_at    | LINC00920     | -1.056779034 | 0.400228056 |
| 241249_at    | PSMD5-AS1     | -1.056903388 | 0.184771843 |
| 1562557_at   | RP11-110H1.8  | -1.056944119 | 0.189665046 |
| 206954_at    | WT1-AS        | -1.057143279 | 0.210838021 |
| 1559654_s_at | GRTP1-AS1     | -1.057145409 | 0.4447128   |
| 1569698_s_at | RP4-777D9.2   | -1.057205784 | 0.197065579 |
| 1562320_at   | NAV2-AS5      | -1.057224801 | 0.185934357 |
| 220900_at    | RP11-549J18.1 | -1.057253019 | 0.438506759 |
| 220664_at    | SPRR2C        | -1.057412083 | 0.292827552 |
| 1558602_a_at | TUSC7         | -1.057417042 | 0.172738465 |
| 243164_s_at  | RP11-215P8.2  | -1.057600693 | 0.110483518 |
| 240584_at    | SHANK2-AS2    | -1.057690239 | 0.274793679 |
| 1556662_at   | LOC100506142  | -1.057703209 | 0.208256378 |
| 229209_at    | SNHG10        | -1.057738153 | 0.180321583 |
| 220209_at    | PYY2          | -1.057862381 | 0.256734913 |
| 1556970_at   | RP11-85A1.3   | -1.057886889 | 0.18659255  |
| 1556365_at   | LY86-AS1      | -1.057975503 | 0.497376095 |
| 1561723_at   | RP11-6F2.5    | -1.057997722 | 0.151862854 |
| 227919_at    | UCA1          | -1.058088917 | 0.366026124 |
| 1559952_x_at | FAM66D        | -1.05809942  | 0.474349497 |
| 208136_s_at  | ZNF205-AS1    | -1.058170372 | 0.2719366   |
| 1564475_s_at | ZBED3-AS1     | -1.058258292 | 0.602736839 |
| 242679_at    | TTN-AS1       | -1.058270192 | 0.582984944 |
| 236001_at    | LINC00675     | -1.058414857 | 0.214995256 |
| 1560654_at   | FLJ37201      | -1.058486648 | 0.417830847 |
| 224272_at    | RACGAP1P      | -1.058486847 | 0.116602816 |
| 1562688_at   | RP11-5P15.1   | -1.058558005 | 0.160516233 |
| 1561289_at   | LOC286370     | -1.058723966 | 0.137603222 |
| 1556494_at   | RP11-236P13.1 | -1.058759882 | 0.255223269 |
| 1570262_at   | RP11-319E12.1 | -1.058769394 | 0.200123356 |
| 1570292_at   | RP11-88I21.2  | -1.058783195 | 0.550248219 |
| 222021_x_at  | SDHAP2        | -1.058796417 | 0.404343065 |
| 236770_at    | TPTE2P5       | -1.058867935 | 0.277760786 |
| 1562543_at   | RP5-865N13.1  | -1.058869012 | 0.162343628 |
| 1559917_a_at | CBR3-AS1      | -1.058890572 | 0.178014552 |
| 209769_s_at  | SEPT5-GP1BB   | -1.058961438 | 0.378017538 |
| 240818_at    | OVCH1-AS1     | -1.05898657  | 0.206209946 |
| 1558950_at   | RP11-63D14.1  | -1.059063048 | 0.238498684 |
| 210645_s_at  | TTC3P1        | -1.059131552 | 0.628652375 |
| 243710_at    | LOC100506175  | -1.05914807  | 0.090534507 |

|              |                |              |             |
|--------------|----------------|--------------|-------------|
| 237421_at    | RP11-768F21.1  | -1.059247204 | 0.309130039 |
| 234309_at    | TTY7B          | -1.059275675 | 0.270085744 |
| 222279_at    | HLA-F-AS1      | -1.059314243 | 0.603265384 |
| 228291_s_at  | PLK1S1         | -1.059427481 | 0.699239894 |
| 243814_at    | RP4-569M23.2   | -1.059554681 | 0.157598056 |
| 1563524_a_at | ITPK1-AS1      | -1.05955969  | 0.191085476 |
| 239141_at    | LOC100126784   | -1.05966537  | 0.205718161 |
| 1562581_at   | LOC254028      | -1.059669242 | 0.265888119 |
| 1561059_a_at | LINC00691      | -1.059711716 | 0.109063555 |
| 1569816_at   | RP11-523L1.2   | -1.059715788 | 0.100938159 |
| 1555786_s_at | LINC00520      | -1.059727345 | 0.332547932 |
| 244284_at    | RP11-805I24.3  | -1.059753574 | 0.316536601 |
| 1559471_s_at | D21S2088E      | -1.059831704 | 0.149402716 |
| 200626_s_at  | SNHG4          | -1.059847095 | 0.61546488  |
| 1569104_a_at | RP11-708J19.1  | -1.059911417 | 0.502924079 |
| 1562914_a_at | LINC00905      | -1.059950647 | 0.184322333 |
| 1559645_at   | LINC00184      | -1.059989639 | 0.109432924 |
| 1559925_s_at | RP11-474P2.2   | -1.060025518 | 0.285418937 |
| 205511_at    | FLJ10038       | -1.060031348 | 0.674990465 |
| 1568787_at   | LOC100506083   | -1.060040712 | 0.571755758 |
| 1556911_at   | ALMS1-IT1      | -1.060063354 | 0.664884163 |
| 1569339_s_at | RP4-647C14.2   | -1.060107621 | 0.238978034 |
| 221054_s_at  | TCL6           | -1.060147957 | 0.211665688 |
| 1561532_at   | DACT3-AS1      | -1.060232706 | 0.32872014  |
| 1562984_at   | RP11-406H4.1   | -1.060260425 | 0.164405614 |
| 1562080_at   | LINC00424      | -1.06030492  | 0.047870726 |
| 240428_at    | LOC285000      | -1.060701986 | 0.181951387 |
| 1557873_at   | RP11-373N22.3  | -1.060780746 | 0.427210746 |
| 239389_at    | RP11-793H13.11 | -1.060834914 | 0.272816187 |
| 1568768_s_at | BRE-AS1        | -1.060850999 | 0.229179599 |
| 228430_at    | BOLA3-AS1      | -1.060896558 | 0.501658774 |
| 240268_at    | LOC440117      | -1.060960984 | 0.095160462 |
| 237512_at    | NAV2-AS2       | -1.061009646 | 0.141696711 |
| 235386_at    | RP11-774O3.3   | -1.061020497 | 0.430781424 |
| 1562586_at   | RP13-379O24.2  | -1.061068582 | 0.293671999 |
| 1556754_at   | LINC00856      | -1.061108454 | 0.127903313 |
| 232863_at    | ZNF890P        | -1.06117731  | 0.195835618 |
| 232105_at    | BLACAT1        | -1.061199597 | 0.699921208 |
| 243644_at    | RP11-350F4.2   | -1.061201436 | 0.218565519 |
| 230334_at    | LOC100507291   | -1.061203515 | 0.311381902 |
| 211460_at    | TTY9B          | -1.061224582 | 0.188859772 |
| 1569738_at   | RP11-152L7.2   | -1.06122962  | 0.257703488 |
| 237368_at    | C3orf35        | -1.061540851 | 0.098097087 |
| 242042_s_at  | HOXD-AS1       | -1.06154621  | 0.258872414 |
| 235909_at    | PCBP1-AS1      | -1.061604876 | 0.289485112 |
| 222314_x_at  | EGOT           | -1.061607975 | 0.33446046  |
| 1554382_at   | LINC00656      | -1.061613914 | 0.162206427 |
| 224419_x_at  | PMCHL1         | -1.061895676 | 0.194406451 |
| 240032_at    | RP11-318A15.2  | -1.061957422 | 0.480350986 |
| 237389_at    | RP11-676J12.4  | -1.061983666 | 0.417418123 |

|              |               |              |             |
|--------------|---------------|--------------|-------------|
| 1561572_at   | RP11-143A12.3 | -1.062140161 | 0.241743222 |
| 236905_at    | RP5-1068B5.3  | -1.062141081 | 0.4082458   |
| 1562670_at   | RP11-862G15.1 | -1.062188436 | 0.129548376 |
| 213569_at    | LOC100506603  | -1.06232169  | 0.594057228 |
| 215283_at    | LINC00667     | -1.062523684 | 0.462897292 |
| 217376_at    | LOC100289473  | -1.06261731  | 0.359969739 |
| 236788_at    | RP11-67C2.2   | -1.062637325 | 0.195799467 |
| 220561_at    | IGF2-AS       | -1.062707741 | 0.134360326 |
| 241283_at    | RP11-112J1.2  | -1.062724035 | 0.043678265 |
| 1557169_x_at | HCG11         | -1.062732522 | 0.643396058 |
| 1561546_at   | FGD5-AS1      | -1.062817739 | 0.114963248 |
| 240937_at    | RP11-17A4.3   | -1.062897536 | 0.226473936 |
| 1559483_at   | PROX1-AS1     | -1.062912051 | 0.477956418 |
| 1562597_at   | RP1-167G20.1  | -1.062953554 | 0.060805478 |
| 232460_at    | RP13-1032I1.7 | -1.063056789 | 0.227708274 |
| 241118_at    | LINC00462     | -1.063080817 | 0.133220994 |
| 1566823_a_at | RP3-449H6.2   | -1.063285759 | 0.232359416 |
| 1561294_a_at | LOC100128554  | -1.063337372 | 0.100855777 |
| 1562053_at   | RP11-10K16.1  | -1.063714535 | 0.549685427 |
| 211050_x_at  | LOC100288069  | -1.06375619  | 0.28503398  |
| 1561424_at   | RP11-643M14.1 | -1.063772279 | 0.315881014 |
| 1567030_at   | SH3GL1P2      | -1.063902205 | 0.397004955 |
| 237794_at    | ANKRD30BP2    | -1.064059905 | 0.374625984 |
| 1569322_at   | LINC00857     | -1.064063352 | 0.196699249 |
| 1561127_at   | ADARB2-AS1    | -1.064086882 | 0.176307734 |
| 1561045_a_at | RP11-540K16.1 | -1.064119071 | 0.186507989 |
| 1558832_at   | SLC2A1-AS1    | -1.064146471 | 0.1091771   |
| 236403_at    | THAP7-AS1     | -1.064207786 | 0.254976047 |
| 238641_at    | TMEM51-AS1    | -1.06423587  | 0.196066617 |
| 1560941_a_at | SACS-AS1      | -1.064284401 | 0.066054028 |
| 1553053_at   | LINC00521     | -1.064419903 | 0.115356307 |
| 241839_at    | DLG3-AS1      | -1.064454207 | 0.295031983 |
| 235901_at    | RP11-589P10.5 | -1.064609642 | 0.665260319 |
| 231564_at    | RP11-109P14.9 | -1.064674634 | 0.241652434 |
| 1563078_at   | RP3-495K2.2   | -1.064705558 | 0.143744597 |
| 236071_at    | C9orf135-AS1  | -1.064712095 | 0.241808447 |
| 207259_at    | LINC00483     | -1.06477587  | 0.062424822 |
| 1559679_a_at | RP11-495K9.5  | -1.064826191 | 0.0752868   |
| 242102_at    | DIAPH3-AS1    | -1.064835036 | 0.143266714 |
| 1560723_at   | LOC283731     | -1.064879884 | 0.155743852 |
| 1557235_at   | RP11-495K9.3  | -1.064885821 | 0.09743465  |
| 1562922_at   | RP11-158I9.5  | -1.064900042 | 0.107434046 |
| 1570234_at   | RP11-799P8.1  | -1.064907664 | 0.052047316 |
| 1559311_at   | EHMT1-IT1     | -1.06499169  | 0.107070621 |
| 1554318_at   | LOC541473     | -1.065058411 | 0.197227692 |
| 223768_at    | SSR4P1        | -1.065080358 | 0.265181642 |
| 1562935_at   | RP11-264L1.1  | -1.065203983 | 0.51000892  |
| 239440_at    | LOC100506858  | -1.065269192 | 0.178293535 |
| 1561103_at   | RP11-378I13.1 | -1.065416137 | 0.167564619 |
| 234141_s_at  | LOC286059     | -1.065474877 | 0.128814173 |

|              |               |              |             |
|--------------|---------------|--------------|-------------|
| 1564444_at   | LOC100130264  | -1.065699209 | 0.280134632 |
| 1553069_at   | BRWD1-IT2     | -1.065703184 | 0.131082446 |
| 1557608_a_at | LOC284080     | -1.065855007 | 0.137481935 |
| 1566830_at   | LOC440028     | -1.065881006 | 0.133468671 |
| 1570301_at   | RP11-6I2.3    | -1.065881428 | 0.273218479 |
| 1565684_at   | LOC400940     | -1.06594708  | 0.116333647 |
| 234753_x_at  | RP11-322E11.2 | -1.065997496 | 0.531966562 |
| 240025_x_at  | RP4-575N6.5   | -1.066010748 | 0.385796262 |
| 240929_at    | RBPMS-AS1     | -1.066038296 | 0.185087905 |
| 1556743_at   | RP11-159G9.5  | -1.066087231 | 0.557726273 |
| 236929_at    | LOC441242     | -1.066138417 | 0.409926928 |
| 1562388_at   | LOC285819     | -1.06614169  | 0.099279321 |
| 240887_at    | LOC100506470  | -1.066220954 | 0.132988461 |
| 1570111_at   | LINC00521     | -1.066237422 | 0.460997484 |
| 237027_at    | LSAMP-AS1     | -1.066270379 | 0.191678591 |
| 232050_at    | FLJ42627      | -1.066344491 | 0.498868758 |
| 239569_at    | FZD10-AS1     | -1.066439277 | 0.268978145 |
| 242332_at    | FENDRR        | -1.06648821  | 0.156518616 |
| 1563781_at   | LOC401320     | -1.066516313 | 0.449501984 |
| 237313_at    | C1QTNF1-AS1   | -1.066720712 | 0.178048746 |
| 215946_x_at  | IGLL3P        | -1.066742994 | 0.603249073 |
| 1563224_at   | RP11-25L3.1   | -1.066746028 | 0.138291146 |
| 1556247_a_at | LOC100506271  | -1.066774601 | 0.193211437 |
| 1569712_at   | RP11-497K21.1 | -1.067060184 | 0.02818168  |
| 209768_s_at  | SEPT5-GP1BB   | -1.067258857 | 0.377579441 |
| 214363_s_at  | SNHG4         | -1.067399925 | 0.472718175 |
| 208118_x_at  | SLC7A5P1      | -1.067415547 | 0.259802096 |
| 237642_at    | CTBP1-AS2     | -1.067469913 | 0.146624839 |
| 237425_at    | SORCS3-AS1    | -1.067517888 | 0.110050064 |
| 1559002_at   | MORF4L2-AS1   | -1.067552654 | 0.26604649  |
| 231497_at    | ZBTB20-AS1    | -1.067640147 | 0.193233069 |
| 1570255_s_at | ANKRD20A12P   | -1.067698165 | 0.763886905 |
| 236886_at    | LOC100049716  | -1.067712524 | 0.207893387 |
| 1557286_at   | RP11-517I3.2  | -1.067784805 | 0.80162282  |
| 1556771_a_at | CNTFR-AS1     | -1.067811937 | 0.191882969 |
| 239507_at    | LINC00608     | -1.06787807  | 0.204829846 |
| 231030_at    | ZRANB2-AS1    | -1.06803481  | 0.243115914 |
| 1557535_at   | RP11-635L1.2  | -1.068313024 | 0.272621058 |
| 1569996_at   | ANKRD26P3     | -1.068356891 | 0.13123056  |
| 1552564_at   | NUDT9P1       | -1.068370675 | 0.517125377 |
| 1570444_at   | LOC643201     | -1.068476811 | 0.398106809 |
| 230068_s_at  | PEG3-AS1      | -1.068647346 | 0.7320585   |
| 222304_x_at  | OR7E47P       | -1.068662141 | 0.375381518 |
| 1569554_at   | RP11-544I20.2 | -1.068731527 | 0.121277973 |
| 208662_s_at  | TTC3P1        | -1.068810219 | 0.474339764 |
| 1557177_at   | LOC100506258  | -1.069056799 | 0.202775512 |
| 1558640_a_at | GUSBP1        | -1.069064471 | 0.38313068  |
| 224041_at    | TTY6B         | -1.069110584 | 0.258010741 |
| 1559648_at   | LINC00892     | -1.06916411  | 0.210348769 |
| 215202_at    | GUSBP11       | -1.069180543 | 0.188464354 |

|              |                |              |             |
|--------------|----------------|--------------|-------------|
| 241047_at    | LINC00340      | -1.069185256 | 0.169469775 |
| 238308_at    | RP11-343H5.6   | -1.06923659  | 0.189878063 |
| 1560384_a_at | RP11-752D24.2  | -1.069270647 | 0.143355565 |
| 244273_at    | RP11-411B10.2  | -1.069453718 | 0.157034833 |
| 236889_at    | RP11-463O12.5  | -1.06955839  | 0.652505121 |
| 1557491_at   | LOC100240728   | -1.069568946 | 0.28088323  |
| 236336_at    | BOLA3-AS1      | -1.069598944 | 0.561430253 |
| 1566480_x_at | RP11-1072C15.6 | -1.069902231 | 0.509863636 |
| 234051_at    | RP11-873E20.1  | -1.069905657 | 0.377756621 |
| 1563221_at   | LOC414300      | -1.069952068 | 0.093888003 |
| 220824_at    | RP11-203H19.2  | -1.069987921 | 0.065953414 |
| 241563_at    | RP11-384L8.1   | -1.070070757 | 0.191959502 |
| 243095_at    | RP11-109M19.1  | -1.070159585 | 0.174887485 |
| 230177_at    | GTF2H2B        | -1.070225017 | 0.614196189 |
| 222080_s_at  | RP1-223E5.4    | -1.070241829 | 0.162414678 |
| 1554405_a_at | LINC00161      | -1.070371537 | 0.056500469 |
| 240366_at    | LHFPL3-AS1     | -1.070407505 | 0.133861773 |
| 214340_at    | ALOX12P2       | -1.070563991 | 0.134377838 |
| 241972_at    | ZNF674-AS1     | -1.070568588 | 0.544028445 |
| 222081_at    | RP1-223E5.4    | -1.070574557 | 0.340632988 |
| 224040_at    | TTY5           | -1.070586858 | 0.212719871 |
| 1557882_at   | RP11-442G21.2  | -1.070596456 | 0.308469701 |
| 236606_at    | RP11-248J18.2  | -1.070722355 | 0.420516083 |
| 207778_at    | REG1P          | -1.070749441 | 0.26675519  |
| 231540_at    | LOC100130691   | -1.070837841 | 0.365130311 |
| 222376_at    | RP11-499E18.1  | -1.070920904 | 0.518330425 |
| 242987_x_at  | RP11-157P1.5   | -1.071150035 | 0.195855682 |
| 235939_at    | RP1-228H13.5   | -1.071214679 | 0.493125447 |
| 241143_at    | RP11-432J9.6   | -1.071230841 | 0.209372867 |
| 234997_x_at  | RP11-488L18.10 | -1.071313248 | 0.569105204 |
| 221148_at    | RP11-457I16.2  | -1.071473499 | 0.074983406 |
| 1553849_at   | CCDC26         | -1.071596555 | 0.376608149 |
| 239781_at    | LINC00545      | -1.071709006 | 0.395210209 |
| 224258_at    | DBIL5P2        | -1.071714053 | 0.299426962 |
| 1568807_a_at | RBM26-AS1      | -1.071940324 | 0.740499056 |
| 1569407_at   | RP1-117O3.2    | -1.071958072 | 0.056497836 |
| 230539_at    | FAM182A        | -1.072009903 | 0.691896913 |
| 206286_s_at  | TDGF1P3        | -1.072032135 | 0.3589342   |
| 1556958_at   | RP1-168L15.6   | -1.072082475 | 0.346960401 |
| 1556704_s_at | LOC286297      | -1.072106283 | 0.494359384 |
| 1562219_at   | LINC00951      | -1.072129931 | 0.328233702 |
| 213775_x_at  | ZNF638-IT1     | -1.072484012 | 0.452570353 |
| 239239_at    | BANCR          | -1.072572031 | 0.328720419 |
| 1558830_at   | RP3-341D10.4   | -1.07268117  | 0.200618336 |
| 240945_at    | RP1-155D22.1   | -1.072798261 | 0.152523446 |
| 1564855_at   | RP11-69H14.6   | -1.072889196 | 0.081962871 |
| 1564244_a_at | LARGE-AS1      | -1.073010695 | 0.035283039 |
| 237266_at    | KCNIP2-AS1     | -1.073146075 | 0.127055886 |
| 229857_s_at  | KANSL1-AS1     | -1.073228448 | 0.399082387 |
| 1563019_at   | RP11-485G7.6   | -1.073295745 | 0.14112278  |

|              |               |              |             |
|--------------|---------------|--------------|-------------|
| 224422_x_at  | PMCHL2        | -1.073412378 | 0.139276425 |
| 1556072_at   | LINC00528     | -1.07343108  | 0.076070778 |
| 231639_at    | RP11-464O2.2  | -1.073503566 | 0.187566756 |
| 205834_s_at  | PART1         | -1.073557413 | 0.229398436 |
| 239639_at    | RP11-353N14.2 | -1.073657431 | 0.546117588 |
| 1569597_at   | RP11-360N9.3  | -1.073701174 | 0.497030795 |
| 233077_at    | NAV2-AS4      | -1.073762737 | 0.166719287 |
| 1564729_at   | RP11-794P6.6  | -1.073775357 | 0.12147432  |
| 1564264_at   | RP11-65J3.14  | -1.073819611 | 0.052115567 |
| 1564027_a_at | LOC154761     | -1.073997917 | 0.641455535 |
| 229319_at    | RP3-425C14.4  | -1.07400259  | 0.622172404 |
| 244800_x_at  | RP11-167N24.3 | -1.074111916 | 0.185524053 |
| 234822_at    | RP11-319G9.4  | -1.074180887 | 0.159846477 |
| 216479_at    | RPL21P28      | -1.074408954 | 0.185497335 |
| 239248_at    | SDCBP2-AS1    | -1.074423424 | 0.220681012 |
| 226365_at    | RP11-846E15.2 | -1.07453176  | 0.634223123 |
| 227885_at    | FOXN3-AS1     | -1.074536273 | 0.206510917 |
| 206824_at    | CES1P1        | -1.074602377 | 0.191910612 |
| 1562751_at   | RP1-58B11.1   | -1.074628245 | 0.293348109 |
| 1552856_at   | LINC00311     | -1.074667554 | 0.033648793 |
| 236753_at    | LINC00689     | -1.074706865 | 0.631065718 |
| 1557721_at   | RP11-416I2.1  | -1.074811767 | 0.403668723 |
| 230953_at    | LOC100286922  | -1.074822254 | 0.064006395 |
| 230952_at    | RP11-426C22.5 | -1.074922876 | 0.175919555 |
| 1568955_at   | SRGAP2D       | -1.074968533 | 0.513984421 |
| 1559595_at   | LOC728084     | -1.075048939 | 0.131568814 |
| 1560449_at   | RP11-713M15.1 | -1.075081318 | 0.057624491 |
| 233399_x_at  | ZNF252P       | -1.075255095 | 0.238495802 |
| 237614_at    | LOC285740     | -1.075307146 | 0.050668484 |
| 236311_at    | LOH12CR2      | -1.075629132 | 0.517869635 |
| 1552576_at   | ALMS1P        | -1.075659623 | 0.361495268 |
| 1556099_at   | LINC00290     | -1.075770495 | 0.107862892 |
| 1566204_at   | RP11-392A14.8 | -1.075806057 | 0.198999424 |
| 239656_at    | LHFPL3-AS2    | -1.075821275 | 0.172932825 |
| 230617_at    | RP11-770G2.4  | -1.075873657 | 0.144081812 |
| 242638_at    | RP11-887P2.5  | -1.076048718 | 0.327601754 |
| 1564836_at   | RP11-18F14.4  | -1.076082363 | 0.196547899 |
| 1570064_at   | RP11-440I14.2 | -1.076097706 | 0.097445197 |
| 1569585_at   | RP11-254F7.1  | -1.07618065  | 0.064214523 |
| 1561004_at   | RP11-5N23.3   | -1.076203312 | 0.331184802 |
| 1556244_s_at | LOC375196     | -1.076240246 | 0.23755654  |
| 1561061_at   | LOC729506     | -1.076290116 | 0.05790654  |
| 220575_at    | FAM106B       | -1.076457052 | 0.595912837 |
| 1553586_at   | FBXL19-AS1    | -1.076592279 | 0.068552012 |
| 242140_at    | ERVK3-1       | -1.076651472 | 0.613174417 |
| 228267_at    | RP11-245P10.8 | -1.0768296   | 0.125118147 |
| 1553061_at   | OR6W1P        | -1.076839498 | 0.061379652 |
| 228412_at    | LOC643072     | -1.076890835 | 0.366813483 |
| 244786_at    | SNHG10        | -1.077008204 | 0.586078426 |
| 1559629_at   | RP11-572C21.1 | -1.077055613 | 0.089448365 |

|              |                |              |             |
|--------------|----------------|--------------|-------------|
| 235715_at    | SPRNP1         | -1.077057114 | 0.047351766 |
| 1560285_at   | RP11-1069G10.2 | -1.077100793 | 0.128354559 |
| 234017_at    | LINC00923      | -1.077143337 | 0.129159545 |
| 1556374_s_at | RP11-661G16.2  | -1.077313795 | 0.162645423 |
| 1568904_at   | RP11-218F4.1   | -1.077330718 | 0.248872898 |
| 231469_at    | NTRK3-AS1      | -1.077725533 | 0.201921401 |
| 1560920_s_at | RP11-295G24.4  | -1.077849062 | 0.081601099 |
| 235774_at    | LOC100422737   | -1.077872065 | 0.097761687 |
| 232616_at    | LOC100129935   | -1.078051552 | 0.107379223 |
| 1557131_at   | SSSCA1-AS1     | -1.078066619 | 0.377959626 |
| 243035_at    | RP11-630C16.1  | -1.078077381 | 0.115276624 |
| 1557518_a_at | RP11-715J22.6  | -1.078138565 | 0.165415172 |
| 234627_at    | FLJ21408       | -1.078246077 | 0.235490059 |
| 237509_at    | RP11-215H22.1  | -1.078275729 | 0.630202189 |
| 1569032_at   | LOC642852      | -1.078406492 | 0.067067136 |
| 1564383_s_at | FLJ35934       | -1.078437652 | 0.522625199 |
| 217609_at    | RPL13P5        | -1.078572112 | 0.422822785 |
| 207215_at    | GSTTP1         | -1.078576357 | 0.078003229 |
| 243762_at    | CTD-2314B22.1  | -1.078590903 | 0.079871746 |
| 236102_at    | LOC100126784   | -1.078690618 | 0.145465746 |
| 233475_at    | MGC32805       | -1.078749419 | 0.243444581 |
| 224003_at    | TTY14          | -1.078817794 | 0.133444859 |
| 1556695_a_at | NR2F1-AS1      | -1.078922346 | 0.493468007 |
| 1559920_a_at | CECR5-AS1      | -1.078935881 | 0.31720778  |
| 1557874_at   | GRID1-AS1      | -1.07911963  | 0.065891085 |
| 1553130_at   | LOC652276      | -1.079305851 | 0.191689872 |
| 215861_at    | RP4-724E16.2   | -1.079473011 | 0.281473837 |
| 1556661_at   | GTSE1-AS1      | -1.079494605 | 0.119669364 |
| 1561896_at   | RP11-111M22.3  | -1.079542489 | 0.379070979 |
| 244843_x_at  | RP11-495P10.6  | -1.079683574 | 0.185068858 |
| 1556465_at   | RP11-310J24.3  | -1.079760815 | 0.135746249 |
| 1569188_s_at | XX-FW83563B9.5 | -1.079880164 | 0.172513101 |
| 232933_at    | KIAA1656       | -1.080060819 | 0.084325434 |
| 211325_x_at  | DSTNP2         | -1.080208544 | 0.307872639 |
| 225584_at    | HCG18          | -1.080230599 | 0.285927054 |
| 1566760_at   | LINC00884      | -1.08037855  | 0.098780277 |
| 1561960_at   | CSPG4P5        | -1.080460887 | 0.112578471 |
| 236758_at    | LOC100132304   | -1.08047554  | 0.037312501 |
| 233835_at    | LOC90246       | -1.080528353 | 0.092021114 |
| 233959_at    | ADCY10P1       | -1.080604026 | 0.510338842 |
| 242914_at    | RP11-307P5.2   | -1.080797241 | 0.105280471 |
| 235921_at    | RP11-554I8.2   | -1.080825538 | 0.052792278 |
| 1569670_at   | PP12613        | -1.080925989 | 0.091391835 |
| 1563009_at   | LOC284930      | -1.081006168 | 0.133119754 |
| 236914_at    | LOC100506790   | -1.081186463 | 0.162745899 |
| 239126_at    | CIRBP-AS1      | -1.081318352 | 0.098491648 |
| 1569472_s_at | TTC3P1         | -1.08137416  | 0.647641975 |
| 1566934_at   | TYRO3P         | -1.081374832 | 0.118763526 |
| 1556899_at   | PRMT5-AS1      | -1.081402065 | 0.121319784 |
| 215816_at    | GUSBP2         | -1.081417566 | 0.12696117  |

|              |               |              |             |
|--------------|---------------|--------------|-------------|
| 217436_x_at  | HLA-J         | -1.081900135 | 0.624119058 |
| 211718_at    | MGC2889       | -1.082015257 | 0.391346441 |
| 243873_at    | RP11-383G10.5 | -1.082098677 | 0.076969053 |
| 234445_at    | ZNRD1-AS1     | -1.082133225 | 0.362899666 |
| 1570266_x_at | ERVH-1        | -1.082215044 | 0.100905183 |
| 1562157_at   | RP5-991C6.3   | -1.082235693 | 0.091105468 |
| 244701_at    | LINC00595     | -1.082245233 | 0.16527695  |
| 238557_at    | CHKB-AS1      | -1.082348119 | 0.265762605 |
| 1552604_at   | LINC00308     | -1.082377191 | 0.076979998 |
| 226146_at    | HEIH          | -1.082498317 | 0.110086099 |
| 234573_at    | RP11-84C10.4  | -1.082539566 | 0.155033596 |
| 241290_at    | RP11-550H2.1  | -1.082556776 | 0.072728565 |
| 1560527_at   | NFE4          | -1.082633283 | 0.053560589 |
| 240756_at    | RP11-131M11.2 | -1.082687629 | 0.1351467   |
| 215812_s_at  | SLC6A10P      | -1.08291685  | 0.49269197  |
| 1562841_at   | LOC339666     | -1.082974454 | 0.081952497 |
| 235373_at    | LOC100506314  | -1.083019229 | 0.088993822 |
| 208663_s_at  | TTC3P1        | -1.083179844 | 0.526640543 |
| 213810_s_at  | AKIRIN2-AS1   | -1.08319686  | 0.229868709 |
| 225860_at    | MMP24-AS1     | -1.083426862 | 0.383969792 |
| 228275_at    | LINC00888     | -1.083477289 | 0.456281365 |
| 1566505_at   | ERVK13-1      | -1.083615173 | 0.0822116   |
| 217115_at    | MKRN7P        | -1.083634073 | 0.068446308 |
| 243870_at    | RP11-285E9.5  | -1.083670242 | 0.066560202 |
| 1564204_at   | LINC00869     | -1.083729131 | 0.222923887 |
| 244411_at    | LOC100507316  | -1.08377504  | 0.576381591 |
| 1557037_a_at | UBAC2-AS1     | -1.083937053 | 0.054893208 |
| 1556452_a_at | LINC00928     | -1.083980317 | 0.043125316 |
| 243680_at    | LOC100506476  | -1.084096947 | 0.370733139 |
| 237447_at    | ADORA2A-AS1   | -1.084259641 | 0.132918946 |
| 244542_at    | BCDIN3D-AS1   | -1.084281269 | 0.162810772 |
| 1555568_at   | GUSBP2        | -1.084393091 | 0.123655685 |
| 1556453_at   | LOC100506274  | -1.084421135 | 0.178521885 |
| 1558844_at   | LOC100506127  | -1.084462497 | 0.478897388 |
| 230978_at    | LINC00967     | -1.084516527 | 0.190665426 |
| 227893_at    | LINC00476     | -1.084819549 | 0.294178984 |
| 1561436_at   | RP11-453A12.1 | -1.085031543 | 0.148293187 |
| 200624_s_at  | SNHG4         | -1.085080143 | 0.54299496  |
| 240793_at    | RP11-171I2.2  | -1.085124965 | 0.272197239 |
| 215298_at    | RP11-714L20.1 | -1.085154397 | 0.129997609 |
| 239444_at    | LOC728024     | -1.085177719 | 0.171932071 |
| 215603_x_at  | GGT3P         | -1.085316944 | 0.116835906 |
| 233679_at    | LOC100506472  | -1.085493704 | 0.144032408 |
| 1563854_s_at | LOC283045     | -1.085712926 | 0.29639613  |
| 239882_at    | RP11-557H15.4 | -1.085784831 | 0.148881305 |
| 216935_at    | LINC00302     | -1.085792971 | 0.05298928  |
| 241090_at    | RP11-304L19.4 | -1.085947717 | 0.069217661 |
| 229870_at    | LOC644656     | -1.086072599 | 0.480176086 |
| 1564281_at   | LINC00491     | -1.086143893 | 0.226668418 |
| 243285_at    | LOC283335     | -1.086146573 | 0.109305158 |



|              |                    |              |             |
|--------------|--------------------|--------------|-------------|
| 210711_at    | LINC00260          | -1.08634041  | 0.647732842 |
| 216240_at    | PVT1               | -1.086386798 | 0.065506999 |
| 240069_at    | RP11-10A14.4       | -1.08640456  | 0.173750122 |
| 225332_at    | OIP5-AS1           | -1.08665174  | 0.569781661 |
| 209697_at    | RP11-582J16.4      | -1.086856231 | 0.127067151 |
| 226579_at    | RP11-73M18.8       | -1.087089816 | 0.43896831  |
| 1559817_at   | LOC100288798       | -1.087115165 | 0.122349635 |
| 243897_at    | U91319.1           | -1.087221177 | 0.193907494 |
| 239483_at    | FLJ37035           | -1.087334981 | 0.073532677 |
| 1570204_at   | ZBED3-AS1          | -1.08764213  | 0.100909434 |
| 1553642_at   | C9orf163           | -1.087656737 | 0.034164517 |
| 1559578_at   | RP5-890E16.2       | -1.087728421 | 0.24371914  |
| 1558787_a_at | RP11-797A18.4      | -1.08784816  | 0.496549624 |
| 235186_at    | LOC388692          | -1.087965206 | 0.236434001 |
| 231447_at    | LINC00851          | -1.087996928 | 0.122232378 |
| 208346_at    | PPBPP2             | -1.088012647 | 0.059599751 |
| 217158_at    | PTGER4P2-CDK2AP2P2 | -1.088094725 | 0.036138464 |
| 1570503_at   | RP11-680F20.10     | -1.088126759 | 0.041056345 |
| 1562630_at   | RP11-2O17.2        | -1.088191978 | 0.093780508 |
| 238149_at    | ZNF818P            | -1.088233997 | 0.54878622  |
| 1559806_at   | RP1-155D22.2       | -1.088449733 | 0.050728023 |
| 1569006_at   | LOC284379          | -1.088641706 | 0.080269633 |
| 244307_s_at  | RP11-38L15.3       | -1.08877026  | 0.181645496 |
| 1564807_at   | RP11-504A18.1      | -1.088892287 | 0.547050281 |
| 230957_at    | PCDHB19P           | -1.088910192 | 0.028104241 |
| 1564277_a_at | LOC286297          | -1.088930887 | 0.146815512 |
| 234943_at    | LOC400927          | -1.089216699 | 0.027560491 |
| 230115_at    | DKFZp779M0652      | -1.089305064 | 0.148637381 |
| 1559924_at   | RP11-474P2.2       | -1.089337278 | 0.069755212 |
| 1561446_at   | RP11-626H12.3      | -1.089457747 | 0.175626534 |
| 229157_at    | PRKAG2-AS1         | -1.089486332 | 0.577297992 |
| 236656_s_at  | LOC100288911       | -1.089518715 | 0.620964355 |
| 237591_at    | LINC00173          | -1.089539483 | 0.696830226 |
| 232420_x_at  | MAN1B1-AS1         | -1.089811496 | 0.280063957 |
| 229747_x_at  | LOC146880          | -1.089868768 | 0.147569008 |
| 228511_s_at  | RP11-998D10.7      | -1.089959568 | 0.058977438 |
| 1560856_at   | ARHGAP26-AS1       | -1.090064502 | 0.078301276 |
| 1557633_at   | POM121L8P          | -1.090385915 | 0.035621478 |
| 222244_s_at  | TUG1               | -1.090465215 | 0.366363073 |
| 1561278_at   | RP11-360A18.2      | -1.090518989 | 0.024250054 |
| 232246_at    | TTC28-AS1          | -1.090695528 | 0.069051817 |
| 233812_at    | LINC00028          | -1.09089702  | 0.075552597 |
| 235826_at    | RP11-355O1.11      | -1.090911691 | 0.244215138 |
| 235323_at    | LOC100499489       | -1.090989776 | 0.082568881 |
| 229569_at    | RP1-193H18.2       | -1.091100214 | 0.60270952  |
| 1558275_at   | RP11-295D4.3       | -1.09115743  | 0.161314726 |
| 1568785_a_at | RP11-461O7.2       | -1.09126435  | 0.02764208  |
| 231071_at    | YTHDF3-AS1         | -1.091501246 | 0.117997182 |
| 239563_at    | RP11-517B11.7      | -1.091611283 | 0.259207149 |
| 231159_at    | CXorf51B           | -1.09169131  | 0.131319526 |

|              |                |              |             |
|--------------|----------------|--------------|-------------|
| 241354_at    | ASMTL-AS1      | -1.091912215 | 0.089692259 |
| 1561307_at   | RP4-568F9.6    | -1.091918735 | 0.125225649 |
| 243406_at    | TMCO5B         | -1.091941277 | 0.042736286 |
| 242557_at    | ZNRD1-AS1      | -1.092479202 | 0.373732459 |
| 235839_at    | C22orf34       | -1.092487927 | 0.117540882 |
| 229668_at    | RP11-182J1.3   | -1.092574747 | 0.167263242 |
| 1562739_at   | LOC285593      | -1.09262383  | 0.056666924 |
| 1557676_at   | RP13-638C3.5   | -1.092676866 | 0.091829218 |
| 1553494_at   | TDH            | -1.092693578 | 0.495865982 |
| 220660_at    | LINC00474      | -1.09285289  | 0.063657916 |
| 1560537_at   | FGF13-AS1      | -1.09301307  | 0.469027315 |
| 1556486_at   | RP11-292F22.7  | -1.093238279 | 0.034352021 |
| 1570395_a_at | FAM66C         | -1.093289162 | 0.544872822 |
| 240648_at    | RP4-613A2.1    | -1.093309096 | 0.066156871 |
| 1552954_at   | C5orf17        | -1.093440426 | 0.337515328 |
| 241196_at    | RP5-1031D4.2   | -1.093536961 | 0.096681031 |
| 1561091_at   | RP11-255G21.1  | -1.093807953 | 0.07285875  |
| 221624_at    | TCL6           | -1.093863931 | 0.060613093 |
| 239799_at    | LINC00476      | -1.094005486 | 0.555758122 |
| 215872_at    | RP6-91H8.1     | -1.094173501 | 0.037656319 |
| 1558848_at   | RP11-783K16.14 | -1.094402392 | 0.045550559 |
| 1563680_at   | LOC284950      | -1.094424036 | 0.082293073 |
| 1561527_at   | RP11-324L3.1   | -1.094443846 | 0.043155272 |
| 220220_at    | LRRC37A4P      | -1.094623413 | 0.532230232 |
| 219840_s_at  | TCL6           | -1.094655247 | 0.049091998 |
| 239407_at    | PAXBP1-AS1     | -1.094868792 | 0.496148307 |
| 1564233_at   | FLJ33534       | -1.095090588 | 0.105930245 |
| 233525_s_at  | LINC00475      | -1.095251591 | 0.242087928 |
| 202091_at    | RP11-407G23.3  | -1.095540794 | 0.27690084  |
| 1559650_at   | JAZF1-AS1      | -1.095924137 | 0.286902105 |
| 239215_at    | LOC100289495   | -1.095929793 | 0.182073357 |
| 1563300_at   | RP11-319E16.1  | -1.095959333 | 0.078353303 |
| 222384_at    | SMG7-AS1       | -1.09598811  | 0.041091259 |
| 214381_at    | LOC441601      | -1.096021016 | 0.021087426 |
| 216188_at    | MYCNOS         | -1.09607207  | 0.144447591 |
| 1562065_at   | RP11-794M8.1   | -1.096079482 | 0.011152427 |
| 1558570_at   | LOC145783      | -1.096142906 | 0.129703384 |
| 1553420_at   | SATB2-AS1      | -1.096297001 | 0.225728968 |
| 236695_at    | STK4-AS1       | -1.096388605 | 0.100290748 |
| 233469_at    | TPTEP1         | -1.096522205 | 0.430121282 |
| 204673_at    | MUC2           | -1.096793089 | 0.018540102 |
| 228832_at    | FLJ20021       | -1.097011845 | 0.127254981 |
| 242262_x_at  | RP4-598G3.1    | -1.097354425 | 0.037220706 |
| 1560784_x_at | RP13-895J2.6   | -1.097378898 | 0.125414217 |
| 230616_at    | LAMB2P1        | -1.097478634 | 0.373922572 |
| 1552698_at   | TUBA3FP        | -1.097553674 | 0.363298999 |
| 243344_at    | RP11-109D9.4   | -1.097619665 | 0.144169029 |
| 220703_at    | IDI2-AS1       | -1.097796195 | 0.579748979 |
| 1560181_at   | LDLRAD4-AS1    | -1.097848987 | 0.047049269 |
| 241759_at    | RP11-445H22.4  | -1.097869583 | 0.049052514 |

|              |               |              |             |
|--------------|---------------|--------------|-------------|
| 1560782_at   | RP13-895J2.6  | -1.098012794 | 0.120027211 |
| 1563082_at   | LINC00486     | -1.098025761 | 0.061593128 |
| 1552862_at   | RUSC1-AS1     | -1.098076764 | 0.375514392 |
| 221634_at    | RPL23AP7      | -1.098097509 | 0.367292942 |
| 1553449_at   | LINC00304     | -1.09809935  | 0.11766406  |
| 214850_at    | SMA4          | -1.098230448 | 0.570122189 |
| 237137_at    | SCARNA2       | -1.098715036 | 0.100483729 |
| 239602_at    | BRWD1-IT2     | -1.098717354 | 0.191864907 |
| 243426_at    | LINC00667     | -1.098797301 | 0.40010819  |
| 233174_at    | LOC100287015  | -1.09886912  | 0.22665122  |
| 210822_at    | RPL13P5       | -1.099002691 | 0.329653671 |
| 241804_at    | RP11-846E15.3 | -1.099005299 | 0.484276953 |
| 238708_at    | ZNF582-AS1    | -1.099043305 | 0.117891793 |
| 1558686_at   | RP11-1021N1.2 | -1.099054919 | 0.477203361 |
| 240015_at    | PRKCQ-AS1     | -1.099125078 | 0.289256279 |
| 1557761_s_at | LOC400794     | -1.099130564 | 0.078089771 |
| 232828_at    | NALCN-AS1     | -1.099232115 | 0.074664969 |
| 1556404_a_at | ZNRF2P1       | -1.09931357  | 0.22295965  |
| 223777_at    | DDX11L2       | -1.099430131 | 0.225920294 |
| 1556304_s_at | LINC00899     | -1.099441252 | 0.282228357 |
| 1556154_a_at | SNAI3-AS1     | -1.099547077 | 0.096661328 |
| 1554203_at   | GRIK1-AS1     | -1.099927161 | 0.031366695 |
| 206557_at    | ZNF702P       | -1.100308889 | 0.267815769 |
| 244274_at    | RP1-179N16.6  | -1.100769534 | 0.277165576 |
| 239344_at    | RP11-491F9.1  | -1.100781601 | 0.051293641 |
| 240305_at    | RP11-809C18.3 | -1.101592321 | 0.269908892 |
| 236310_at    | ZNF37BP       | -1.10162996  | 0.651649753 |
| 236164_at    | FLJ10038      | -1.101821705 | 0.498099541 |
| 242618_at    | HCG18         | -1.102233633 | 0.524375359 |
| 241625_at    | LOC389834     | -1.102511473 | 0.068030445 |
| 1570469_at   | RP11-308N19.1 | -1.102667647 | 0.313204189 |
| 1560412_at   | LOC100507506  | -1.102862543 | 0.048261411 |
| 1569378_at   | LINC00942     | -1.103008316 | 0.028676153 |
| 1558577_at   | LOC148709     | -1.103098154 | 0.088287877 |
| 222048_at    | CRYBB2P1      | -1.103503056 | 0.374019992 |
| 243101_x_at  | RP1-310O13.12 | -1.103632825 | 0.142968025 |
| 1557475_at   | LINC00507     | -1.103647189 | 0.544200762 |
| 235487_at    | RP11-644F5.11 | -1.103792817 | 0.100610317 |
| 237889_s_at  | LOC100422737  | -1.103934513 | 0.037603398 |
| 233278_at    | RP11-45M22.2  | -1.10406818  | 0.028246476 |
| 1557063_at   | DICER1-AS1    | -1.1045785   | 0.155329431 |
| 1556903_at   | RP6-191P20.4  | -1.104615638 | 0.131809291 |
| 1569235_a_at | RP11-209D14.2 | -1.105085433 | 0.030370617 |
| 239753_at    | ZNF252P       | -1.105242576 | 0.096348991 |
| 1560589_a_at | RP11-231N3.1  | -1.105974335 | 0.103517024 |
| 232731_x_at  | RAMP2-AS1     | -1.106035894 | 0.406856927 |
| 244074_at    | RP11-629O1.2  | -1.106082269 | 0.11612283  |
| 1557821_at   | LINC00639     | -1.106111145 | 0.310415304 |
| 1554940_a_at | LOC388882     | -1.106131584 | 0.097508803 |
| 1561421_a_at | RP11-395B7.2  | -1.106154377 | 0.081929426 |

|              |               |              |             |
|--------------|---------------|--------------|-------------|
| 215670_s_at  | SCAND2P       | -1.106249451 | 0.141275696 |
| 1555151_s_at | TDH           | -1.106483098 | 0.265038231 |
| 1559194_a_at | CLEC4GP1      | -1.106708018 | 0.091251314 |
| 220904_at    | LINC00574     | -1.107066096 | 0.201449622 |
| 239924_at    | GUSBP11       | -1.107189256 | 0.392321605 |
| 237116_at    | LOC646903     | -1.107254469 | 0.703990716 |
| 243712_at    | XIST          | -1.107514654 | 0.219576176 |
| 215725_at    | DGCR11        | -1.108046707 | 0.127830764 |
| 226458_at    | RP1-39G22.7   | -1.108368579 | 0.490558625 |
| 215542_at    | RP11-298I3.3  | -1.108411627 | 0.083245688 |
| 204132_s_at  | FOXO3B        | -1.108963641 | 0.301053629 |
| 37590_g_at   | RP11-617F23.1 | -1.109354063 | 0.522974377 |
| 1556971_a_at | RP11-85A1.3   | -1.109477331 | 0.029541572 |
| 242491_at    | RP11-974F13.6 | -1.109740672 | 0.352914094 |
| 244543_s_at  | BCDIN3D-AS1   | -1.109950386 | 0.022417665 |
| 221979_at    | TOPORS-AS1    | -1.110332225 | 0.217687473 |
| 224489_at    | RP11-798G7.6  | -1.11051444  | 0.6284554   |
| 220719_at    | RP11-197N18.8 | -1.110741518 | 0.389223392 |
| 213378_s_at  | DDX12P        | -1.110904278 | 0.31968441  |
| 221172_at    | C7orf69       | -1.110978144 | 0.012726935 |
| 1569191_at   | ZNF826P       | -1.111021042 | 0.281520025 |
| 228612_at    | RAB30-AS1     | -1.111060908 | 0.238920386 |
| 231440_at    | LINC00943     | -1.111275791 | 0.135084079 |
| 1556334_s_at | RP11-408H20.3 | -1.111481587 | 0.047289826 |
| 233962_at    | FAM83C-AS1    | -1.111509913 | 0.052735158 |
| 231233_at    | PCAT6         | -1.111652098 | 0.374640805 |
| 220747_at    | LINC00652     | -1.111869147 | 0.038443086 |
| 210589_s_at  | GBAP1         | -1.111918007 | 0.252870851 |
| 1557117_at   | INTS6-AS1     | -1.111925316 | 0.062372563 |
| 1567334_at   | RP11-24J11.1  | -1.111951203 | 0.022959354 |
| 1557124_at   | TMEM198B      | -1.112046336 | 0.056239261 |
| 1560390_s_at | LINC00663     | -1.11216873  | 0.318364596 |
| 1563073_at   | RP11-157D23.1 | -1.112421562 | 0.059046687 |
| 225054_x_at  | LINC00674     | -1.11264136  | 0.051944484 |
| 225055_at    | LINC00674     | -1.112761766 | 0.20696084  |
| 205114_s_at  | CCL3L1        | -1.112881178 | 0.769959857 |
| 228601_at    | HOXD-AS1      | -1.113014021 | 0.72944306  |
| 228215_at    | ADD3-AS1      | -1.113168433 | 0.157764107 |
| 1570396_at   | FAM66C        | -1.113276922 | 0.277884167 |
| 1568615_a_at | SRD5A3-AS1    | -1.113314268 | 0.143012994 |
| 1556505_at   | LINC00605     | -1.114140871 | 0.070568524 |
| 1558790_s_at | ZNF252P-AS1   | -1.114290297 | 0.018847798 |
| 227332_at    | PXN-AS1       | -1.114524698 | 0.162928077 |
| 233512_at    | SH3RF3-AS1    | -1.11480782  | 0.080442723 |
| 1561309_x_at | RP4-568F9.6   | -1.114928586 | 0.012867596 |
| 228799_at    | RP11-85F14.5  | -1.114940157 | 0.228866395 |
| 244429_at    | RP11-796E2.4  | -1.115069737 | 0.051877384 |
| 1552872_at   | ASMTL-AS1     | -1.115103511 | 0.061401814 |
| 237048_at    | RP11-66N11.8  | -1.115535385 | 0.166738225 |
| 220629_at    | KCNQ1DN       | -1.116277113 | 0.068895613 |

|              |               |              |             |
|--------------|---------------|--------------|-------------|
| 215470_at    | GTF2H2B       | -1.116306192 | 0.474664293 |
| 226210_s_at  | MEG3          | -1.116409015 | 0.764963973 |
| 230302_at    | RP11-48B3.4   | -1.11723297  | 0.48022564  |
| 1570212_a_at | GNN           | -1.117334742 | 0.022125834 |
| 229338_at    | LOC100289361  | -1.11768148  | 0.195998385 |
| 244196_at    | RP11-73M18.7  | -1.117893263 | 0.243075455 |
| 1553357_at   | LINC00889     | -1.118215952 | 0.623727945 |
| 244741_s_at  | ZNF667-AS1    | -1.118692775 | 0.345708617 |
| 227925_at    | ST3GAL4-AS1   | -1.119237176 | 0.224365054 |
| 1561624_at   | RP11-723G8.1  | -1.119273753 | 0.027389638 |
| 217399_s_at  | FOXO3B        | -1.119413599 | 0.239946339 |
| 1558234_at   | KCNJ2-AS1     | -1.119494884 | 0.201970034 |
| 228172_at    | RP11-244O19.1 | -1.119928164 | 0.203174661 |
| 239168_at    | LOC400940     | -1.119963708 | 0.023997811 |
| 233095_at    | RP11-389G6.3  | -1.120123663 | 0.539145413 |
| 216404_at    | ATXN8OS       | -1.120148791 | 0.010040735 |
| 213657_s_at  | RP11-617F23.1 | -1.120331646 | 0.495402573 |
| 231333_at    | LOC100505515  | -1.12102709  | 0.021964289 |
| 241064_at    | RP11-456O19.2 | -1.1211544   | 0.016242804 |
| 1556797_at   | RNF144A-AS1   | -1.121205907 | 0.135708533 |
| 1561257_at   | LOC286083     | -1.121334082 | 0.022035347 |
| 222031_at    | LOC389906     | -1.121561197 | 0.101558648 |
| 243083_at    | LOC100287834  | -1.12166818  | 0.033553531 |
| 239584_at    | RP11-767I20.1 | -1.121679188 | 0.623102859 |
| 237385_at    | LINC00867     | -1.122194477 | 0.040533149 |
| 1568597_at   | LOC646762     | -1.122275667 | 0.215908978 |
| 1564426_x_at | LOC729732     | -1.122536189 | 0.579450798 |
| 236323_at    | PVRL3-AS1     | -1.122584376 | 0.121216404 |
| 232294_at    | TMEM254-AS1   | -1.12296392  | 0.23615694  |
| 215590_x_at  | ACVR2B-AS1    | -1.123037319 | 0.010211542 |
| 1569960_at   | BRD7P3        | -1.123520726 | 0.037812464 |
| 231602_at    | RP11-483H20.6 | -1.1238762   | 0.034876437 |
| 206809_s_at  | HNRNPA3P1     | -1.124264736 | 0.212885854 |
| 231088_at    | MORF4L2-AS1   | -1.124277039 | 0.405747945 |
| 1569745_at   | OSER1-AS1     | -1.124738757 | 0.026285633 |
| 1568609_s_at | LINC00623     | -1.125258758 | 0.289543883 |
| 1556401_a_at | RP11-547D24.1 | -1.1255512   | 0.212333587 |
| 221944_at    | FLJ42627      | -1.125565044 | 0.233826847 |
| 1557118_a_at | INTS6-AS1     | -1.125570217 | 0.397062741 |
| 230248_x_at  | RP11-395I6.3  | -1.125986464 | 0.423756531 |
| 1552422_at   | C10orf25      | -1.126234716 | 0.173524919 |
| 234592_at    | RP11-375I20.6 | -1.126606836 | 0.08234058  |
| 236111_at    | RP11-341N2.1  | -1.126964093 | 0.103987683 |
| 1559579_at   | LINC00927     | -1.127261904 | 0.014394217 |
| 233013_x_at  | WAC-AS1       | -1.127530124 | 0.053019658 |
| 1563853_at   | LOC283045     | -1.1289882   | 0.12140296  |
| 229640_x_at  | LINC00621     | -1.129339937 | 0.167224234 |
| 1561391_at   | STAU2-AS1     | -1.129553951 | 0.054584891 |
| 210655_s_at  | FOXO3B        | -1.129741873 | 0.356368405 |
| 1553426_at   | C5orf64       | -1.130728087 | 0.090993251 |

|              |                |              |             |
|--------------|----------------|--------------|-------------|
| 230236_at    | TDRG1          | -1.130781525 | 0.024731198 |
| 1556447_at   | LINC00606      | -1.130832068 | 0.319527254 |
| 1569805_at   | RP11-1018N14.1 | -1.13134095  | 0.022296686 |
| 1556448_a_at | LINC00606      | -1.131734006 | 0.277344864 |
| 207582_at    | PIN1P1         | -1.132249393 | 0.028520981 |
| 211457_at    | GABARAPL3      | -1.132414174 | 0.064373095 |
| 225577_at    | HCG18          | -1.132730579 | 0.109493587 |
| 239174_at    | LOC100505912   | -1.132835341 | 0.58078596  |
| 237275_at    | LINC00458      | -1.132973126 | 0.007929768 |
| 237345_at    | RP11-349E4.1   | -1.133591796 | 0.007809134 |
| 228200_at    | ZNF252P        | -1.134098737 | 0.142515565 |
| 1559102_at   | RP11-73K9.2    | -1.13440401  | 0.27297472  |
| 1556183_at   | ANKRD36BP2     | -1.134482943 | 0.214124587 |
| 222205_x_at  | FAM27B         | -1.134514783 | 0.348268235 |
| 229187_at    | LOC283788      | -1.13477494  | 0.491398691 |
| 237111_at    | LOC388942      | -1.135329711 | 0.01721256  |
| 228593_at    | MTMR9LP        | -1.135333753 | 0.051693652 |
| 1557371_a_at | LINC00961      | -1.135511002 | 0.055198916 |
| 230812_at    | LINC00673      | -1.135574633 | 0.117502672 |
| 206082_at    | HCP5           | -1.135751492 | 0.498542127 |
| 224444_s_at  | LINC00467      | -1.137397423 | 0.277446261 |
| 235203_at    | RP11-498C9.15  | -1.137404792 | 0.178339901 |
| 208661_s_at  | TTC3P1         | -1.137551232 | 0.230103387 |
| 1561480_a_at | RP11-632P5.1   | -1.137710463 | 0.372262729 |
| 1561479_at   | RP11-632P5.1   | -1.137783411 | 0.496532793 |
| 237326_at    | LINC00310      | -1.137795305 | 0.169058722 |
| 1556414_at   | LINC00515      | -1.138561377 | 0.367774886 |
| 1568957_x_at | SRGAP2D        | -1.138830784 | 0.306125385 |
| 240392_at    | RP11-334C17.5  | -1.139058396 | 0.313305054 |
| 230171_at    | RP11-10L12.4   | -1.139702479 | 0.08384724  |
| 1556846_at   | RP11-1006G14.1 | -1.139823387 | 0.016541684 |
| 242366_at    | RP11-135F9.3   | -1.139925327 | 0.1591565   |
| 237244_at    | C10orf71-AS1   | -1.140383376 | 0.002374267 |
| 1561369_at   | RP1-63G5.5     | -1.140421138 | 0.069147601 |
| 230858_at    | LINC00673      | -1.140531789 | 0.154434509 |
| 1561346_at   | RP11-433M22.2  | -1.141236783 | 0.302201128 |
| 1556789_a_at | PAXBP1-AS1     | -1.141506501 | 0.215901451 |
| 1557215_at   | LINC00648      | -1.141628074 | 0.450090727 |
| 227664_at    | FLJ37453       | -1.141826049 | 0.09679848  |
| 219817_at    | MAPKAPK5-AS1   | -1.142459968 | 0.056917348 |
| 238529_at    | RP11-196G18.23 | -1.143074625 | 0.311865801 |
| 242692_at    | GLYCTK-AS1     | -1.143097405 | 0.391382014 |
| 213510_x_at  | USP32P2        | -1.143600734 | 0.365052926 |
| 243298_at    | RP11-298I3.6   | -1.144149023 | 0.085799338 |
| 1560010_a_at | SATB2-AS1      | -1.144215164 | 0.007823583 |
| 49679_s_at   | MMP24-AS1      | -1.144226371 | 0.097239728 |
| 229698_at    | SHANK3         | -1.144352846 | 0.100339882 |
| 228117_at    | NDUFA6-AS1     | -1.144731039 | 0.018349347 |
| 1557038_s_at | UBAC2-AS1      | -1.144889851 | 0.115519236 |
| 1559171_at   | MGC57346       | -1.145114641 | 0.246082767 |

|              |               |              |             |
|--------------|---------------|--------------|-------------|
| 224070_at    | AKR1C6P       | -1.145450193 | 0.002823494 |
| 225657_at    | NCBP2-AS2     | -1.145517639 | 0.132317781 |
| 238485_at    | IQCH-AS1      | -1.146440618 | 0.218238373 |
| 228925_at    | ADAM1A        | -1.147955798 | 0.355334322 |
| 232207_at    | GUSBP4        | -1.148043783 | 0.28317611  |
| 220710_at    | ANP32A-IT1    | -1.148385363 | 0.234140711 |
| 208247_at    | ERC2-IT1      | -1.149977731 | 0.243365032 |
| 229323_at    | LINC00959     | -1.150742273 | 0.288802497 |
| 1561262_at   | RP11-80K21.3  | -1.151479627 | 0.026542015 |
| 230325_at    | LOC100133985  | -1.152404219 | 0.09051324  |
| 217753_s_at  | RPS26P11      | -1.152592253 | 0.301359985 |
| 1557007_a_at | RP11-304C12.3 | -1.152828066 | 0.007612748 |
| 1556301_at   | LOC100287015  | -1.152898617 | 0.231122122 |
| 232740_at    | MCM3AP-AS1    | -1.153605759 | 0.375512975 |
| 1554249_a_at | ZNF638-IT1    | -1.154132606 | 0.356168196 |
| 233021_at    | RBM26-AS1     | -1.155142919 | 0.190600332 |
| 1568812_at   | LOC100507140  | -1.1554181   | 0.035078879 |
| 244740_at    | ZNF667-AS1    | -1.156166834 | 0.15484975  |
| 239242_at    | SLC25A5-AS1   | -1.156246148 | 0.186362537 |
| 243954_at    | LINC00877     | -1.156422742 | 0.158556588 |
| 230388_s_at  | KANSL1-AS1    | -1.15662923  | 0.494991878 |
| 209767_s_at  | SEPT5-GP1BB   | -1.157059055 | 0.282078224 |
| 215847_at    | HERC2P3       | -1.157630041 | 0.452689092 |
| 240409_at    | TPTE2P5       | -1.157725963 | 0.239069398 |
| 239015_at    | THAP7-AS1     | -1.158262765 | 0.090888497 |
| 1560006_a_at | LOC646762     | -1.158374165 | 0.055406259 |
| 241624_at    | LOC389834     | -1.158436349 | 0.079407194 |
| 208664_s_at  | TTC3P1        | -1.158526927 | 0.35618568  |
| 220352_x_at  | FLJ42627      | -1.158614216 | 0.084717072 |
| 236076_at    | LOC257396     | -1.159144158 | 0.33988423  |
| 228650_at    | RP5-935K16.1  | -1.159256932 | 0.105710311 |
| 1558793_at   | FRY-AS1       | -1.160879243 | 0.123690494 |
| 1556195_a_at | RP4-798A10.7  | -1.161340308 | 0.260537916 |
| 205510_s_at  | FLJ10038      | -1.161516017 | 0.197085329 |
| 233106_at    | FRMD6-AS1     | -1.161719082 | 0.188026475 |
| 240574_at    | DNAJC3-AS1    | -1.161792673 | 0.405531063 |
| 226457_at    | RP1-39G22.7   | -1.162925011 | 0.241343813 |
| 244308_at    | RP11-38L15.3  | -1.163900841 | 0.227592681 |
| 1559049_a_at | RP11-1055B8.6 | -1.164239946 | 0.045116283 |
| 1557410_at   | LOC100506606  | -1.164319946 | 0.33290367  |
| 213971_s_at  | SUZ12P1       | -1.165734076 | 0.12934627  |
| 240352_at    | RP11-7O11.3   | -1.166318175 | 0.029147449 |
| 239064_at    | RP11-378A13.1 | -1.166867333 | 0.139810442 |
| 243428_at    | KCNQ1OT1      | -1.167046626 | 0.331583523 |
| 240577_at    | TRAF3IP2-AS1  | -1.167298061 | 0.078740139 |
| 1558046_x_at | LOC389906     | -1.167928589 | 0.069250757 |
| 232632_at    | RP11-797A18.5 | -1.168033042 | 0.357078607 |
| 229829_at    | LINC00526     | -1.168258921 | 0.089204679 |
| 227715_at    | MAFIP         | -1.169467762 | 0.121295123 |
| 241671_x_at  | LINC00340     | -1.169518625 | 0.017199336 |

|              |               |              |             |
|--------------|---------------|--------------|-------------|
| 1558512_at   | RP11-819C21.1 | -1.169606544 | 0.263825938 |
| 1557443_s_at | LOC100505811  | -1.16996558  | 0.049381517 |
| 237365_at    | ELOVL2-AS1    | -1.170352634 | 0.366735382 |
| 1561439_at   | RP11-953B20.1 | -1.1714254   | 0.014749321 |
| 221953_s_at  | MMP24-AS1     | -1.171813378 | 0.110270455 |
| 216476_at    | OR7E91P       | -1.171972857 | 0.014396822 |
| 1559163_at   | INHBA-AS1     | -1.172002416 | 0.373551648 |
| 235191_at    | LINC00662     | -1.173321383 | 0.257913228 |
| 1557107_at   | SLC26A4-AS1   | -1.173792143 | 0.445527469 |
| 228643_at    | RAB30-AS1     | -1.174855536 | 0.330703798 |
| 1563916_at   | WDR11-AS1     | -1.174862618 | 0.053167265 |
| 229689_s_at  | RP13-39P12.3  | -1.175323481 | 0.253566857 |
| 236798_at    | LINC00888     | -1.17543909  | 0.229587097 |
| 222177_s_at  | SCAND2P       | -1.178334246 | 0.014560683 |
| 1556216_s_at | RP11-45P15.4  | -1.178361545 | 0.302372629 |
| 1556102_x_at | LOC389906     | -1.17892921  | 0.159215571 |
| 213408_s_at  | PI4KAP1       | -1.179630631 | 0.270951202 |
| 229130_at    | RP11-774O3.3  | -1.179754997 | 0.278825862 |
| 229090_at    | ZEB1-AS1      | -1.18003433  | 0.341495972 |
| 231303_at    | LINC00158     | -1.180035441 | 0.113037097 |
| 215211_at    | RRN3P1        | -1.180211422 | 0.140900045 |
| 237450_at    | LOC389332     | -1.1824133   | 0.019063753 |
| 238727_at    | RP11-384O8.1  | -1.184335187 | 0.517219158 |
| 219731_at    | ENTPD1-AS1    | -1.184750939 | 0.021498847 |
| 1556742_at   | GUSBP1        | -1.184866561 | 0.202267366 |
| 1557133_at   | LINC00632     | -1.185619014 | 0.620053714 |
| 1555865_at   | TOLLIP-AS1    | -1.186899984 | 0.105631829 |
| 229227_at    | DICER1-AS1    | -1.187960171 | 0.133203794 |
| 1560482_at   | RP11-966I7.2  | -1.188039876 | 0.093725246 |
| 1570376_at   | LINC00689     | -1.188162891 | 0.50414486  |
| 235251_at    | RP4-555D20.2  | -1.188270251 | 0.569932155 |
| 235829_at    | CAHM          | -1.188481486 | 0.394901576 |
| 64432_at     | MAPKAPK5-AS1  | -1.188648025 | 0.055740088 |
| 239509_at    | FLJ16779      | -1.189889819 | 0.591228783 |
| 1553987_at   | MAPKAPK5-AS1  | -1.190079351 | 0.015215986 |
| 229328_at    | ZNF571-AS1    | -1.190221946 | 0.128393303 |
| 1558722_at   | ZNF252P       | -1.190305974 | 0.266934298 |
| 1557014_a_at | FAM201A       | -1.190713707 | 0.217840541 |
| 236400_at    | IDH1-AS1      | -1.190891527 | 0.030626408 |
| 243726_at    | RP11-203B7.1  | -1.190980201 | 0.000676773 |
| 212337_at    | TUG1          | -1.191319005 | 0.085149364 |
| 208109_s_at  | LINC00597     | -1.191525486 | 0.304889785 |
| 226793_at    | LINC00294     | -1.192006514 | 0.146364325 |
| 227593_at    | FLJ37453      | -1.192253894 | 0.174205935 |
| 233310_at    | RP11-143K11.1 | -1.193167199 | 0.182485632 |
| 228972_at    | PITPNA-AS1    | -1.193573619 | 0.102946066 |
| 1565806_at   | FLJ37035      | -1.193906348 | 0.054946011 |
| 212725_s_at  | TUG1          | -1.193926587 | 0.047154392 |
| 238916_at    | LINC00938     | -1.195659843 | 0.033079465 |
| 1570281_at   | RP11-604N13.1 | -1.196762816 | 0.006251888 |



|              |                 |              |             |
|--------------|-----------------|--------------|-------------|
| 229480_at    | MAGI2-AS3       | -1.198537346 | 0.253818913 |
| 228889_at    | ARHGAP5-AS1     | -1.199179621 | 0.092663003 |
| 243435_at    | KCNQ1OT1        | -1.20013614  | 0.186112472 |
| 231592_at    | TSIX            | -1.201304877 | 0.480904359 |
| 238091_at    | LOC100506388    | -1.201688289 | 0.175758799 |
| 234594_at    | ITPK1-AS1       | -1.201889344 | 0.209577251 |
| 231337_at    | TEX41           | -1.203146467 | 0.273462254 |
| 233981_at    | RP11-125K10.4   | -1.203668507 | 0.063120538 |
| 232975_at    | HCG18           | -1.204212479 | 0.08487917  |
| 242364_x_at  | TNRC6C-AS1      | -1.204546903 | 0.109906249 |
| 232298_at    | MBNL1-AS1       | -1.205209129 | 0.112676563 |
| 1558167_a_at | MGC16275        | -1.205698724 | 0.174031267 |
| 229318_at    | RP11-119F19.2   | -1.20856376  | 0.132955251 |
| 226211_at    | MEG3            | -1.209185853 | 0.583670831 |
| 232953_at    | LINC00266-1     | -1.211136382 | 0.187223807 |
| 1558166_at   | MGC16275        | -1.211329436 | 0.222531114 |
| 236716_at    | RP11-731J8.2    | -1.213916428 | 0.114325683 |
| 213013_at    | LOC644172       | -1.21400469  | 0.075641153 |
| 1557098_s_at | HAR1A           | -1.214196531 | 0.160858058 |
| 222307_at    | PDCD4-AS1       | -1.216997218 | 0.128318393 |
| 230566_at    | MORC2-AS1       | -1.217384812 | 0.03092428  |
| 1554447_at   | JPX             | -1.219066495 | 0.254406333 |
| 1556043_a_at | TTN-AS1         | -1.219994411 | 0.172245627 |
| 1564632_at   | RP11-588G21.1   | -1.221330856 | 0.050162539 |
| 1552665_at   | JMJD1C-AS1      | -1.22147876  | 0.015224288 |
| 228449_at    | MORC2-AS1       | -1.221556044 | 0.069522688 |
| 1556159_at   | RP11-762L8.6    | -1.222596892 | 0.205085054 |
| 240578_at    | LINC00836       | -1.223103987 | 0.15957721  |
| 214376_at    | RP13-514E23.1   | -1.223465273 | 0.409552097 |
| 1553448_at   | FLJ34503        | -1.224777491 | 0.066031998 |
| 1556147_at   | RP11-16N11.2    | -1.224796154 | 0.176753155 |
| 232001_at    | PRKCQ-AS1       | -1.225306677 | 0.149039257 |
| 1558474_at   | RP11-1114A5.4   | -1.226301983 | 0.141164721 |
| 1556992_at   | LOC550113       | -1.227626862 | 0.035106054 |
| 1560853_x_at | ZNF826P         | -1.228487432 | 0.069518461 |
| 1556148_s_at | RP11-16N11.2    | -1.228868755 | 0.089330399 |
| 59433_at     | LOC389906       | -1.228928799 | 0.049712126 |
| 215972_at    | PART1           | -1.22909355  | 0.284724202 |
| 235014_at    | ILF3-AS1        | -1.22961675  | 0.125555193 |
| 239325_at    | DNAJC27-AS1     | -1.22974495  | 0.018783375 |
| 1559045_at   | LOC100128288    | -1.231293158 | 0.041552205 |
| 214685_at    | NOP14-AS1       | -1.231519673 | 0.085374694 |
| 231186_at    | LINC00643       | -1.233904728 | 0.237338447 |
| 1557788_a_at | LINC00476       | -1.234576396 | 0.015691208 |
| 228839_s_at  | LOC642361       | -1.235842452 | 0.083713271 |
| 1557542_at   | RP11-384P7.7    | -1.236234884 | 0.089318853 |
| 235207_at    | RP11-1094M14.11 | -1.236256027 | 0.03725158  |
| 238498_at    | RP3-406A7.7     | -1.239058608 | 0.266103167 |
| 230562_at    | LOC100507530    | -1.239491469 | 0.003968992 |
| 242873_at    | RP11-277P12.20  | -1.240382808 | 0.178497433 |

|              |                |              |             |
|--------------|----------------|--------------|-------------|
| 228160_at    | LINC00667      | -1.243861653 | 0.078666134 |
| 220324_at    | LINC00472      | -1.245797204 | 0.117054764 |
| 240246_at    | LOC642236      | -1.246163855 | 0.260964086 |
| 1557617_at   | DCTN1-AS1      | -1.247496682 | 0.098874226 |
| 231164_at    | ABCA17P        | -1.247887878 | 0.129211384 |
| 243261_at    | LINC00689      | -1.249306742 | 0.328426241 |
| 243553_x_at  | TRAF3IP2-AS1   | -1.249385951 | 0.002461737 |
| 1560751_at   | AQP4-AS1       | -1.249487122 | 0.119709364 |
| 243952_at    | TPTEP1         | -1.250213521 | 0.413536323 |
| 221621_at    | SCARNA16       | -1.256345283 | 0.018960461 |
| 238872_at    | LOC100128239   | -1.258097373 | 0.050708755 |
| 212182_at    | NUDT4P1        | -1.260543825 | 0.086497844 |
| 241745_at    | LOC100507557   | -1.261087348 | 0.174916693 |
| 230187_s_at  | RP11-457M11.5  | -1.261925736 | 0.193068849 |
| 239793_at    | RP11-73M18.6   | -1.262487904 | 0.038511044 |
| 240436_at    | MIPEPP3        | -1.26643699  | 0.085528545 |
| 230787_at    | RP11-126K1.6   | -1.270675743 | 0.070100628 |
| 1560425_s_at | RP11-75C9.1    | -1.270981583 | 0.245583022 |
| 1560119_at   | LINC00937      | -1.271626871 | 0.072554286 |
| 1554143_a_at | SUGT1P3        | -1.271803096 | 0.060297114 |
| 242208_at    | ZNF37BP        | -1.274070306 | 0.241442513 |
| 236555_at    | TRAF3IP2-AS1   | -1.274292833 | 0.015171572 |
| 239742_at    | RP11-732M18.3  | -1.274790299 | 0.140101283 |
| 205833_s_at  | PART1          | -1.27708381  | 0.00233199  |
| 239062_at    | TNRC6C-AS1     | -1.279286409 | 0.074660804 |
| 1569629_x_at | LOC389906      | -1.280720854 | 0.146865554 |
| 228397_at    | TUG1           | -1.2813184   | 0.037393669 |
| 1557883_a_at | RP11-442G21.2  | -1.286951601 | 0.007964217 |
| 235888_at    | GUSBP1         | -1.288016753 | 0.206501694 |
| 227330_x_at  | MAFIP          | -1.291100037 | 0.154744239 |
| 203463_s_at  | EPN2-IT1       | -1.291611849 | 0.044664171 |
| 244189_at    | TTC28-AS1      | -1.292582422 | 0.02892432  |
| 230526_at    | TNRC6C-AS1     | -1.305924207 | 0.042884537 |
| 1554741_s_at | KGFLP1         | -1.316592873 | 0.129265043 |
| 1558045_a_at | LOC389906      | -1.317925536 | 0.094534457 |
| 230738_at    | RP11-196G18.23 | -1.320185371 | 0.057085906 |
| 242577_at    | LOC389834      | -1.322611447 | 0.182266565 |
| 1553440_at   | AQP4-AS1       | -1.325791279 | 0.156312343 |
| 228012_at    | SNHG4          | -1.325941444 | 0.024677112 |
| 230449_x_at  | RP11-410L14.2  | -1.325994017 | 0.029364256 |
| 215358_x_at  | ZNF37BP        | -1.327515441 | 0.008188333 |
| 236902_at    | LINC00643      | -1.328087015 | 0.143007464 |
| 1556160_a_at | RP11-762L8.6   | -1.329412457 | 0.069769104 |
| 226413_at    | LINC00938      | -1.331774088 | 0.011155509 |
| 215180_at    | RP11-429B14.4  | -1.332167122 | 0.083108157 |
| 227446_s_at  | DHRS4-AS1      | -1.33814901  | 0.021690862 |
| 227923_at    | SHANK3         | -1.340059733 | 0.125764189 |
| 241743_at    | RP4-613B23.1   | -1.342296714 | 0.012513884 |
| 1558906_a_at | OSER1-AS1      | -1.343991052 | 0.009828273 |
| 222196_at    | LOC389906      | -1.344786627 | 0.061075154 |

|              |               |              |             |
|--------------|---------------|--------------|-------------|
| 1562953_s_at | WDFY3-AS2     | -1.345239117 | 0.041825762 |
| 244631_at    | LOC389834     | -1.346911088 | 0.114058108 |
| 235936_at    | LINC00925     | -1.349791299 | 0.026639432 |
| 1569746_s_at | OSER1-AS1     | -1.350344766 | 0.014021561 |
| 230356_at    | RP13-238F13.5 | -1.353374656 | 0.011193677 |
| 1562831_a_at | WDR11-AS1     | -1.353656902 | 0.062519935 |
| 233562_at    | LINC00839     | -1.354338451 | 0.179728391 |
| 230589_at    | TRAF3IP2-AS1  | -1.356629931 | 0.173294627 |
| 1553796_at   | LOC400940     | -1.358249976 | 0.260838167 |
| 217637_at    | RP4-791K14.2  | -1.364024841 | 0.023599473 |
| 1564856_s_at | LOC727924     | -1.366544402 | 0.022845603 |
| 1569348_at   | TPTEP1        | -1.37401833  | 0.280042844 |
| 1562389_at   | RP11-9G1.3    | -1.38233294  | 0.13727302  |
| 230307_at    | SLC25A21-AS1  | -1.384215652 | 0.096819734 |
| 1559826_a_at | LINC00960     | -1.387543175 | 0.074303605 |
| 214623_at    | FBXW4P1       | -1.38988026  | 0.045920411 |
| 226947_at    | GUSBP4        | -1.390705461 | 0.018934744 |
| 203464_s_at  | EPN2-IT1      | -1.392519313 | 0.019124048 |
| 1569110_x_at | LOC728613     | -1.393218645 | 0.121860593 |
| 1556314_a_at | RP11-389C8.2  | -1.403195718 | 0.058093787 |
| 206565_x_at  | SMA4          | -1.404991193 | 0.006448666 |
| 227452_at    | LINC00673     | -1.407198996 | 0.038098736 |
| 1555892_s_at | PSMD5-AS1     | -1.408995215 | 0.150816085 |
| 239863_at    | RP11-305E6.4  | -1.409556099 | 0.077585808 |
| 1557366_at   | CCDC144B      | -1.412573408 | 0.060666401 |
| 220459_at    | MCM3AP-AS1    | -1.416687252 | 0.061339592 |
| 1564175_at   | LINC00960     | -1.425844424 | 0.092464103 |
| 236575_at    | ARHGEF26-AS1  | -1.431731031 | 0.10066891  |
| 228376_at    | GGTA1P        | -1.432961515 | 0.124682828 |
| 206777_s_at  | CRYBB2P1      | -1.433672111 | 0.021535402 |
| 1558225_at   | RP11-731J8.2  | -1.435236682 | 0.048259489 |
| 229715_at    | RP1-239B22.5  | -1.43985123  | 0.070427422 |
| 231031_at    | KGFLP2        | -1.439864899 | 0.067249189 |
| 237885_at    | SOX21-AS1     | -1.444274831 | 0.111128963 |
| 244289_at    | ZNF300P1      | -1.446867053 | 0.184094171 |
| 224870_at    | DANCR         | -1.447355773 | 0.005376845 |
| 229748_x_at  | MAFIP         | -1.451160282 | 0.074167963 |
| 1564392_at   | LINC00320     | -1.455675026 | 0.068885999 |
| 229580_at    | RP11-13L2.4   | -1.456383827 | 0.219178877 |
| 228740_at    | RP11-999E24.3 | -1.468605771 | 0.05101143  |
| 237471_at    | LINC00689     | -1.484281246 | 0.335394919 |
| 215043_s_at  | GUSBP9        | -1.491478386 | 0.005887721 |
| AFF.HUMRGE.M | #N/A          | -1.498659105 | 0.034358107 |
| 1559827_at   | LINC00960     | -1.504694606 | 0.073919983 |
| 1564936_at   | RP11-182J23.1 | -1.51354934  | 0.096882069 |
| 237675_at    | RP11-547I7.2  | -1.52085007  | 0.090086049 |
| 237400_at    | RP11-247L20.4 | -1.524229292 | 0.007476715 |
| 231859_at    | C14orf132     | -1.529970841 | 0.028169139 |
| 229781_at    | LOC100506725  | -1.541509235 | 0.044298032 |
| 1570120_at   | RP11-268G12.1 | -1.563599004 | 0.211094262 |

|              |               |              |             |
|--------------|---------------|--------------|-------------|
| 230876_at    | ZNF883        | -1.5786939   | 0.031795046 |
| 217014_s_at  | AZGP1P1       | -1.58084155  | 0.041404326 |
| 218820_at    | C14orf132     | -1.583674113 | 0.025434952 |
| 229613_at    | RP11-401P9.4  | -1.585978821 | 0.076008236 |
| 230650_at    | RP11-102F4.3  | -1.6057136   | 0.246223154 |
| 1553797_a_at | LOC400940     | -1.619737381 | 0.294398192 |
| 241401_at    | WDFY3-AS2     | -1.6503084   | 0.020713685 |
| 238081_at    | WDFY3-AS2     | -1.651983674 | 0.025694182 |
| 214120_at    | RFPL1S        | -1.703746869 | 0.145949619 |
| 1558226_a_at | RP11-731J8.2  | -1.739679015 | 0.026783976 |
| 232833_at    | RP6-201G10.2  | -1.743300865 | 0.060694333 |
| 238360_s_at  | LINC00672     | -1.784330423 | 0.017339443 |
| 230741_at    | RP11-340F14.5 | -1.806502451 | 0.018193326 |
| 1557481_a_at | LINC00320     | -1.807399882 | 0.035993792 |
| 226558_at    | MAFIP         | -1.83690181  | 0.052832816 |
| 239671_at    | RP11-355I22.7 | -1.847082512 | 0.027680631 |
| 1558388_a_at | UG0898H09     | -1.888278803 | 0.051276553 |
| 238603_at    | LINC00925     | -1.968565962 | 0.007793102 |
| 1558387_at   | UG0898H09     | -1.982271974 | 0.019376898 |
| 1563367_at   | MAPT-AS1      | -1.985038306 | 0.00685486  |
| 240869_at    | RP4-791K14.2  | -2.002367141 | 0.011026718 |
| 1556904_at   | RP11-731J8.2  | -2.002488287 | 0.039334398 |
| 224589_at    | XIST          | -2.220479455 | 0.279076366 |
| 1559992_a_at | LINC00645     | -2.419436201 | 0.003165824 |
| 214218_s_at  | XIST          | -2.45972015  | 0.252279633 |
| 221728_x_at  | XIST          | -2.514931544 | 0.253688694 |
| 227671_at    | XIST          | -2.742634897 | 0.264371864 |
| 224590_at    | XIST          | -2.761623574 | 0.224374338 |
| 237696_at    | RP11-231C18.1 | -2.798992159 | 0.004870465 |
| 230577_at    | LINC00844     | -2.940354956 | 0.010491933 |
| 224588_at    | XIST          | -3.302290561 | 0.215853516 |
