# Supplementary material for: The long non-coding RNA HOTAIRM1 promotes tumor aggressiveness and radiotherapy resistance in glioblastoma
Source: Springer Nature journal article supplement (doi:10.1038/s41419-021-04146-0), 2021-09-28
Supplement: MOESM14 [file 41419_2021_4146_MOESM14_ESM.pdf]

**Supplementary Table 3. Mass spectrometry results of transient *HOTAIRMI* knockdown cells**

Data supplied as Log2 intensities

| ID         | LN-229_HOTAIRMI_KD | LN-229_control | T98G_HOTAIRMI_KD | T98G_control | U251_HOTAIRMI_KD | U251_control |
|------------|--------------------|----------------|------------------|--------------|------------------|--------------|
| A2M        | 23.7961            | 24.2484        | 20.9874          | 21.8376      | 24.5263          | 19.6764      |
| AAAS       | 21.0028            | 21.4093        | 21.9546          | 22.0133      | 21.4531          | 21.2581      |
| AAK1       | 20.1521            | 19.0896        | 19.113           | 18.7751      | 19.5256          | 19.2923      |
| AAMP       | 18.2859            | 17.5486        | 18.3186          | 17.919       | 18.2106          | 19.1009      |
| AAR2       | 18.2256            | 17.0338        | 17.9656          | 18.1982      | 16.6947          | 17.4465      |
| AARS       | 24.9249            | 22.774         | 23.8972          | 23.4092      | 23.6321          | 24.7188      |
| AARS2      | 20.3005            | 18.9527        | 19.5286          | 19.8007      | 19.1916          | 21.1651      |
| AASDHPPT   | 19.2435            | 18.435         | 19.3625          | 18.8208      | 18.8118          | 19.0492      |
| AASS       | 19.7797            | 20.343         | 20.1296          | 20.2994      | 20.105           | 20.1463      |
| AATF       | 18.0309            | 19.4514        | 19.3122          | 19.5214      | 19.4427          | 18.9327      |
| ABCB6      | 19.0761            | 17.5803        | 18.6887          | 19.2478      | 16.1452          | 18.9584      |
| ABCB7      | 18.0416            | 19.2249        | 18.8478          | 18.9956      | 19.9263          | 19.2378      |
| ABCC1      | 21.7664            | 20.9115        | 22.6724          | 23.0943      | 20.1247          | 20.4115      |
| ABCC4      | 20.1448            | 17.3922        | 19.061           | 19.4672      | 16.2738          | 14.8332      |
| ABCD3      | 20.7152            | 20.583         | 21.8341          | 21.8103      | 20.491           | 21.1906      |
| ABCE1      | 23.7282            | 23.2568        | 23.4971          | 23.1871      | 23.9215          | 24.1421      |
| ABCF1      | 19.8182            | 20.6761        | 19.4084          | 18.7626      | 20.7844          | 21.2962      |
| ABCF2      | 20.0245            | 19.7535        | 20.6983          | 20.5713      | 20.1085          | 21.3692      |
| ABCF3      | 19.3566            | 18.1994        | 18.776           | 18.9915      | 18.9064          | 20.612       |
| ABHD10     | 21.3017            | 22.1339        | 22.1204          | 22.0633      | 22.3354          | 21.0212      |
| ABHD11     | 20.4188            | 20.3011        | 21.3861          | 21.5546      | 20.4524          | 20.2456      |
| ABHD12     | 20.8257            | 20.504         | 20.6276          | 21.0875      | 20.6896          | 20.6127      |
| ABHD14B    | 19.225             | 19.0796        | 18.6864          | 18.8932      | 19.2182          | 20.0557      |
| ABLIM3     | 18.8124            | 19.5443        | 17.0045          | 15.5612      | 20.4128          | 13.3227      |
| ABR        | 17.8089            | 17.9075        | 18.4318          | 17.6137      | 18.799           | 19.0705      |
| AC013461.1 | 18.7127            | 18.5323        | 19.0265          | 18.5328      | 19.5132          | 17.3768      |
| ACAA1      | 21.6187            | 22.153         | 21.6172          | 21.8022      | 21.9257          | 22.3319      |
| ACAA2      | 22.8125            | 22.1665        | 22.0531          | 22.3475      | 22.124           | 21.1992      |
| ACACA      | 20.0134            | 20.214         | 21.1055          | 20.8865      | 20.6307          | 21.5537      |
| ACAD8      | 21.0336            | 20.5175        | 19.9341          | 19.9711      | 20.8             | 20.4349      |
| ACAD9      | 20.0819            | 20.4788        | 21.4202          | 21.2849      | 20.7161          | 19.9568      |
| ACADM      | 24.0113            | 23.2541        | 23.7704          | 23.5907      | 23.7396          | 24.1142      |
| ACADSB     | 20.7204            | 19.8947        | 20.9369          | 21.168       | 19.9709          | 21.0647      |
| ACADVL     | 24.6323            | 24.2466        | 24.861           | 25.0692      | 24.399           | 24.2135      |
| ACAT1      | 24.4307            | 23.8659        | 24.4069          | 24.7179      | 23.7886          | 23.7469      |
| ACAT2      | 23.3492            | 21.552         | 21.8328          | 21.5623      | 21.4649          | 23.3567      |
| ACBD3      | 21.4743            | 21.1724        | 21.4577          | 21.2153      | 21.8511          | 21.3696      |
| ACIN1      | 22.0597            | 22.2294        | 22.0812          | 22.2529      | 22.2223          | 21.7356      |
| ACLY       | 24.9424            | 25.1736        | 24.5684          | 24.4177      | 25.4569          | 25.781       |
| ACO1       | 22.0551            | 23.06          | 21.4542          | 20.7756      | 23.7709          | 21.5579      |

|         |         |         |         |         |         |         |
|---------|---------|---------|---------|---------|---------|---------|
| ACO2    | 25.4374 | 24.4815 | 25.2355 | 25.3069 | 24.8406 | 24.559  |
| ACOT1   | 21.471  | 20.9596 | 19.2869 | 19.8685 | 21.142  | 20.3219 |
| ACOT7   | 23.9148 | 21.9422 | 23.2441 | 23.0282 | 22.5368 | 23.9407 |
| ACOT8   | 20.1089 | 20.799  | 19.7738 | 19.754  | 20.2673 | 18.3876 |
| ACOT9   | 21.5259 | 20.3501 | 21.0181 | 21.2916 | 20.6431 | 18.77   |
| ACOX1   | 20.0364 | 19.5286 | 19.8286 | 20.3313 | 18.6492 | 20.0742 |
| ACOX3   | 17.7828 | 17.5764 | 19.2548 | 19.2677 | 17.0565 | 17.8182 |
| ACP1    | 22.2282 | 21.0478 | 21.2699 | 21.1311 | 21.6348 | 22.5451 |
| ACP2    | 20.2988 | 21.208  | 19.8145 | 20.0719 | 21.0331 | 19.7677 |
| ACSF2   | 19.9312 | 20.7814 | 20.6578 | 20.9057 | 20.2222 | 18.8488 |
| ACSF3   | 18.4246 | 17.419  | 18.9046 | 19.3968 | 16.9276 | 17.2587 |
| ACSL1   | 21.0785 | 20.2379 | 20.8442 | 20.6417 | 20.8557 | 17.4565 |
| ACSL3   | 21.9468 | 23.0329 | 23.4505 | 23.7262 | 23.3187 | 23.5539 |
| ACSL4   | 24.3207 | 24.3618 | 24.6122 | 24.3593 | 24.922  | 24.034  |
| ACSL5   | 16.8745 | 18.6737 | 18.641  | 18.2118 | 19.7463 | 16.8334 |
| ACSS1   | 19.2728 | 18.8198 | 19.6452 | 19.1923 | 19.3178 | 19.051  |
| ACSS2   | 18.8424 | 14.0305 | 16.2151 | 15.551  | 14.8546 | 14.5305 |
| ACTB    | 29.0856 | 28.9118 | 27.6962 | 28.2321 | 28.8405 | 28.7376 |
| ACTBL2  | 22.5427 | 23.1985 | 22.831  | 22.0786 | 23.21   | 21.896  |
| ACTC1   | 26.8743 | 26.0377 | 25.4368 | 26.2565 | 26.5273 | 26.5993 |
| ACTL6A  | 22.2247 | 22.1064 | 22.4338 | 22.3769 | 22.0722 | 22.6051 |
| ACTN1   | 27.5091 | 27.2805 | 26.189  | 26.1548 | 27.3437 | 26.6488 |
| ACTN4   | 27.373  | 27.4897 | 27.5946 | 27.5927 | 27.5287 | 28.4069 |
| ACTR1A  | 22.9323 | 22.3841 | 21.9544 | 21.9007 | 22.5283 | 22.4171 |
| ACTR2   | 23.2729 | 23.5837 | 23.3411 | 23.3657 | 24.1593 | 24.1802 |
| ACTR3   | 24.9867 | 24.9113 | 24.5446 | 24.5718 | 25.3106 | 25.272  |
| ADAM17  | 19.5217 | 20.1666 | 19.7857 | 19.6957 | 20.2457 | 20.2495 |
| ADAM9   | 17.9153 | 18.3758 | 18.5035 | 18.3194 | 17.0284 | 17.495  |
| ADAR    | 22.1556 | 22.6764 | 23.0053 | 23.3126 | 22.7154 | 22.8091 |
| ADD1    | 20.909  | 19.8814 | 20.9295 | 21.0123 | 19.1293 | 20.1996 |
| ADD3    | 19.8287 | 18.7452 | 20.5096 | 20.1932 | 18.5603 | 18.0168 |
| ADGRE5  | 16.3714 | 18.8441 | 18.5698 | 18.0389 | 18.4568 | 18.9359 |
| ADH5    | 25.0812 | 23.7503 | 23.3092 | 23.0081 | 23.9888 | 23.9091 |
| ADK     | 20.6658 | 19.2821 | 18.7013 | 18.189  | 20.2099 | 20.146  |
| ADNP    | 19.5806 | 20.9011 | 20.1593 | 20.5252 | 20.8818 | 19.9696 |
| ADPGK   | 18.7625 | 19.8549 | 20.0339 | 20.5336 | 19.9171 | 18.8443 |
| ADPRHL2 | 18.9345 | 17.5555 | 18.0601 | 17.6246 | 17.5999 | 19.6167 |
| ADRM1   | 21.0928 | 20.3425 | 20.7679 | 20.4989 | 20.4934 | 21.0483 |
| ADSL    | 21.6994 | 21.1395 | 20.9936 | 20.7199 | 21.3878 | 22.4407 |
| ADSS    | 23.3445 | 22.1214 | 22.1147 | 21.5851 | 22.813  | 23.5554 |
| AFAP1   | 16.5625 | 18.044  | 15.9496 | 15.9601 | 15.5913 | 17.2699 |
| AFG3L2  | 21.3645 | 21.6948 | 22.1537 | 22.1144 | 21.9586 | 21.8471 |
| AGFG1   | 19.4842 | 17.5207 | 19.26   | 18.5923 | 18.0955 | 20.6882 |
| AGK     | 22.6146 | 22.537  | 22.8293 | 22.8837 | 22.5285 | 23.2106 |
| AGL     | 20.494  | 19.0307 | 18.735  | 18.7682 | 18.6238 | 19.3685 |
| AGO2    | 20.6808 | 20.9319 | 20.8374 | 19.9512 | 21.5048 | 21.8291 |
| AGPAT1  | 18.9125 | 18.6584 | 18.0192 | 18.5188 | 19.0767 | 18.3967 |
| AGPS    | 23.651  | 23.498  | 24.4342 | 24.4365 | 23.5746 | 24.2872 |
| AGRN    | 15.5709 | 17.2067 | 16.2063 | 16.9685 | 17.3173 | 15.5727 |
| AGTRAP  | 17.4985 | 18.8824 | 19.2135 | 19.033  | 19.3249 | 16.0985 |
| AHCTF1  | 16.5902 | 18.3972 | 17.938  | 17.8113 | 18.5185 | 16.0158 |
| AHCY    | 24.0507 | 23.9086 | 24.2935 | 24.0781 | 24.0319 | 25.0436 |

|            |         |         |         |         |         |         |
|------------|---------|---------|---------|---------|---------|---------|
| AHCYL1     | 22.0383 | 20.6479 | 20.3593 | 20.2167 | 21.2811 | 21.1553 |
| AHNAK      | 27.7118 | 26.7778 | 28.1183 | 28.1623 | 27.3843 | 25.892  |
| AHNAK2     | 18.0279 | 16.7209 | 16.74   | 16.59   | 17.7556 | 17.7427 |
| AHSA1      | 22.6471 | 21.791  | 21.2953 | 21.3431 | 22.2096 | 23.6437 |
| AHSG       | 20.2662 | 17.2362 | 16.0226 | 16.5597 | 18.2434 | 13.7051 |
| AIDA       | 22.6833 | 22.7954 | 22.3648 | 22.0449 | 23.2337 | 22.6547 |
| AIFM1      | 23.1291 | 22.9655 | 23.6603 | 24.0173 | 22.8096 | 23.7071 |
| AIM1       | 18.7582 | 16.5526 | 17.6857 | 16.0567 | 15.2952 | 16.6055 |
| AIMP1      | 22.669  | 21.356  | 21.703  | 21.9016 | 21.6798 | 22.4239 |
| AIMP2      | 23.0503 | 22.4332 | 22.3881 | 22.2995 | 22.208  | 23.1048 |
| AIP        | 21.1371 | 20.6894 | 20.4568 | 20.3237 | 20.9542 | 20.8343 |
| AK1        | 21.5111 | 19.5334 | 19.294  | 19.3764 | 19.9346 | 19.969  |
| AK2        | 23.0585 | 23.7456 | 24.2318 | 24.58   | 23.6914 | 23.9211 |
| AK3        | 22.5737 | 21.8356 | 22.1942 | 22.4056 | 22.0508 | 22.7859 |
| AK4        | 21.1557 | 19.9135 | 20.2268 | 20.4665 | 19.9552 | 22.2183 |
| AK5        | 17.494  | 17.4504 | 18.5817 | 18.1819 | 18.0801 | 17.2483 |
| AKAP8      | 18.7356 | 19.0485 | 18.6623 | 18.7465 | 19.2725 | 19.5369 |
| AKAP8L     | 18.8204 | 19.0345 | 18.4986 | 18.5861 | 18.9429 | 18.838  |
| AKR1A1     | 21.2345 | 19.9302 | 19.456  | 19.5189 | 20.307  | 20.0954 |
| AKR1B1     | 26.9814 | 26.5094 | 25.7655 | 25.4157 | 26.3416 | 24.3892 |
| AKR1B10    | 23.6919 | 20.0383 | 24.6316 | 24.4146 | 19.9562 | 20.4004 |
| AKR1C1     | 20.0617 | 16.4945 | 21.6698 | 21.2496 | 15.3305 | 16.035  |
| AKR1C2     | 22.648  | 17.894  | 22.2103 | 22.4979 | 18.33   | 17.9656 |
| AKR1C3     | 23.4622 | 17.8916 | 22.4926 | 22.5299 | 17.5441 | 21.066  |
| AKR7A2     | 21.7382 | 20.3214 | 19.7331 | 19.7292 | 20.6548 | 20.9659 |
| AL365273.1 | 19.6432 | 13.5177 | 13.6419 | 14.5513 | 12.8926 | 12.5845 |
| ALB        | 25.6081 | 23.5976 | 21.1159 | 21.4855 | 23.8647 | 20.9132 |
| ALCAM      | 20.7579 | 23.438  | 21.8558 | 21.8177 | 23.3432 | 21.527  |
| ALDH16A1   | 20.5753 | 18.8611 | 17.9202 | 17.7123 | 19.4155 | 20.1981 |
| ALDH18A1   | 23.7377 | 23.7525 | 24.6834 | 24.775  | 24.2328 | 24.6851 |
| ALDH1A3    | 20.0997 | 20.3048 | 20.6149 | 20.6604 | 20.383  | 21.1938 |
| ALDH1B1    | 19.8021 | 21.5686 | 21.2448 | 21.254  | 21.4192 | 21.9849 |
| ALDH1L2    | 16.8007 | 18.7424 | 13.3588 | 14.2949 | 20.0037 | 15.1933 |
| ALDH2      | 25.2713 | 22.6089 | 24.4373 | 24.7247 | 22.9483 | 22.4818 |
| ALDH3A1    | 23.654  | 18.6037 | 20.2673 | 19.9371 | 18.5883 | 19.6998 |
| ALDH3A2    | 22.663  | 20.2528 | 22.3146 | 22.3781 | 20.5586 | 21.1566 |
| ALDH4A1    | 18.2931 | 18.7061 | 17.9657 | 18.5888 | 18.5973 | 16.6563 |
| ALDH6A1    | 20.7116 | 20.1422 | 19.7388 | 19.7246 | 20.4252 | 20.4095 |
| ALDH7A1    | 24.3728 | 23.4163 | 21.4926 | 21.7229 | 23.265  | 22.8361 |
| ALDH9A1    | 22.4497 | 22.8272 | 21.111  | 21.4658 | 22.6167 | 22.3903 |
| ALDOA      | 28.5415 | 26.9562 | 27.0282 | 26.9419 | 27.1088 | 28.1704 |
| ALDOC      | 26.3    | 24.4006 | 24.4998 | 23.9608 | 24.9266 | 25.9306 |
| ALG1       | 19.6632 | 20.2725 | 20.3183 | 20.2693 | 20.0604 | 18.1783 |
| ALG2       | 16.6397 | 18.0614 | 17.1419 | 17.2945 | 15.616  | 13.6388 |
| ALG5       | 18.8361 | 18.5175 | 19.95   | 19.9037 | 18.2753 | 18.9209 |
| ALYREF     | 20.9761 | 21.7559 | 21.7553 | 22.0167 | 21.6456 | 22.6898 |
| AMFR       | 19.5046 | 19.1203 | 20.326  | 20.0349 | 19.5109 | 19.418  |
| AMIGO2     | 17.0146 | 16.5275 | 16.466  | 15.8886 | 17.1107 | 18.4034 |
| AMPD2      | 20.3435 | 19.6352 | 19.9169 | 19.6124 | 20.351  | 20.7507 |
| AMPD3      | 18.812  | 20.0911 | 19.0424 | 19.4009 | 22.3997 | 19.0834 |
| ANAPC1     | 18.3739 | 17.0628 | 17.6752 | 17.4424 | 17.4885 | 17.2657 |
| ANAPC4     | 17.1053 | 18.0158 | 18.2412 | 18.2051 | 18.0679 | 17.9496 |

|          |         |         |         |         |         |         |
|----------|---------|---------|---------|---------|---------|---------|
| ANAPC7   | 18.7856 | 18.7874 | 19.1052 | 18.8506 | 19.2742 | 19.3364 |
| ANK3     | 11.8055 | 14.5034 | 16.2015 | 15.067  | 15.5629 | 16.1255 |
| ANKFY1   | 20.7509 | 19.8546 | 20.8618 | 20.036  | 20.3428 | 19.7837 |
| ANKHD1   | 17.4045 | 16.6454 | 16.8419 | 16.8628 | 16.4997 | 17.8714 |
| ANKLE2   | 16.1686 | 16.2176 | 16.2561 | 17.3157 | 16.1624 | 14.9357 |
| ANKRD52  | 16.6504 | 16.1732 | 15.6262 | 14.9349 | 16.0685 | 16.9005 |
| ANLN     | 20.7599 | 19.7907 | 21.1887 | 20.4278 | 20.0285 | 19.7507 |
| ANO10    | 15.9604 | 17.741  | 17.3667 | 17.6065 | 15.7358 | 15.422  |
| ANO6     | 18.5605 | 18.4818 | 18.4308 | 18.456  | 18.8175 | 17.4256 |
| ANP32A   | 18.3656 | 18.9951 | 19.0788 | 19.9251 | 18.9368 | 20.0012 |
| ANP32B   | 22.3509 | 21.8638 | 21.8086 | 21.9249 | 21.9332 | 22.4058 |
| ANP32E   | 21.8434 | 21.666  | 21.504  | 21.1304 | 21.7036 | 21.9867 |
| ANPEP    | 21.6983 | 26.7327 | 21.3281 | 21.2826 | 27.2884 | 21.7359 |
| ANTXR1   | 17.0217 | 16.9393 | 17.9449 | 18.1068 | 14.6995 | 13.8798 |
| ANTXR2   | 16.1514 | 17.2666 | 15.046  | 14.2156 | 16.856  | 12.3711 |
| ANXA1    | 26.6378 | 25.995  | 25.9468 | 25.8645 | 26.3814 | 27.2957 |
| ANXA11   | 22.4525 | 21.7461 | 22.3374 | 21.8603 | 21.8628 | 22.2144 |
| ANXA2    | 28.5516 | 28.4392 | 28.9478 | 29.157  | 28.2932 | 29.8117 |
| ANXA4    | 22.4093 | 20.514  | 21.2734 | 20.8264 | 20.8294 | 21.3252 |
| ANXA5    | 26.9199 | 26.9081 | 25.2955 | 25.1027 | 27.2611 | 25.95   |
| ANXA6    | 25.4413 | 25.4066 | 25.534  | 25.2208 | 25.58   | 22.2095 |
| ANXA7    | 22.6836 | 21.9886 | 21.5479 | 21.4782 | 22.408  | 22.4962 |
| AP1B1    | 23.1263 | 22.9239 | 22.7147 | 22.75   | 23.0919 | 23.2562 |
| AP1G1    | 22.7789 | 22.3409 | 22.6683 | 22.3569 | 23.1763 | 23.1313 |
| AP1M1    | 21.6232 | 20.9772 | 21.3995 | 21.1014 | 21.5209 | 22.1936 |
| AP1S1    | 16.8618 | 17.573  | 17.9168 | 17.849  | 19.3311 | 18.167  |
| AP2A1    | 22.3407 | 23.4117 | 22.6497 | 23.2432 | 22.8021 | 23.1738 |
| AP2A2    | 21.3438 | 21.5807 | 21.9689 | 21.6613 | 21.5757 | 20.3569 |
| AP2B1    | 24.0473 | 24.0865 | 24.2894 | 24.1849 | 23.9507 | 24.1855 |
| AP2M1    | 21.5749 | 22.396  | 21.8021 | 22.1791 | 22.6076 | 22.5031 |
| AP2S1    | 21.2341 | 21.9364 | 21.2853 | 21.8725 | 21.4334 | 20.8836 |
| AP3B1    | 21.5689 | 21.7507 | 21.3766 | 20.7051 | 22.5461 | 22.0271 |
| AP3D1    | 19.432  | 20.5422 | 20.1092 | 19.8282 | 20.7478 | 20.2431 |
| AP3M1    | 21.6429 | 21.3808 | 21.2312 | 20.9173 | 21.8491 | 21.7929 |
| AP3S1    | 19.5342 | 19.5768 | 19.2175 | 18.9748 | 20.3036 | 18.7765 |
| APEH     | 20.9219 | 20.2122 | 19.7682 | 19.5308 | 20.8196 | 22.063  |
| APEX1    | 24.0332 | 23.3182 | 22.3946 | 22.4264 | 22.7606 | 22.9349 |
| API5     | 22.2124 | 23.1513 | 22.7145 | 22.6996 | 23.2241 | 23.505  |
| APIP     | 14.9609 | 14.3827 | 9.6483  | 14.1222 | 14.5331 | 9.08322 |
| APLP2    | 18.9667 | 18.3131 | 19.0584 | 18.781  | 18.5219 | 19.1048 |
| APMAP    | 23.8326 | 23.5219 | 24.3752 | 24.3274 | 23.6235 | 24.2484 |
| APOA1BP  | 19.7658 | 17.7679 | 19.2174 | 19.1622 | 17.7868 | 19.7382 |
| APOB     | 19.3939 | 18.8855 | 19.0964 | 18.7089 | 19.2171 | 19.6495 |
| APOBEC3B | 21.0679 | 20.8489 | 22.047  | 22.1332 | 20.764  | 19.2956 |
| APOBEC3C | 20.7499 | 20.113  | 21.0192 | 20.9316 | 20.0467 | 19.3432 |
| APOL2    | 18.4014 | 19.3933 | 18.8969 | 18.9026 | 19.2143 | 17.6203 |
| APOO     | 19.4266 | 18.6044 | 20.1789 | 20.2058 | 18.8712 | 19.3755 |
| APP      | 16.8738 | 16.5701 | 17.15   | 16.9873 | 16.4832 | 16.8049 |
| APPL1    | 16.9265 | 16.1069 | 16.1844 | 15.8076 | 16.4303 | 18.082  |
| APRT     | 22.8382 | 22.2876 | 22.3175 | 22.3393 | 22.3796 | 22.7857 |
| AQR      | 19.2461 | 20.2651 | 20.9001 | 20.9092 | 19.5288 | 19.1748 |
| ARAP1    | 18.4012 | 19.6594 | 18.9627 | 18.6918 | 20.3452 | 19.2659 |

|          |         |         |         |         |         |         |
|----------|---------|---------|---------|---------|---------|---------|
| ARCN1    | 24.263  | 24.1311 | 23.8203 | 23.6226 | 24.6089 | 23.8247 |
| ARF4     | 20.6907 | 22.1722 | 21.5903 | 21.7115 | 22.7138 | 22.095  |
| ARF6     | 16.9173 | 18.8847 | 17.94   | 17.9499 | 18.4953 | 16.2563 |
| ARFGAP1  | 19.4868 | 19.1038 | 19.2625 | 18.5049 | 19.9163 | 19.9512 |
| ARFGAP2  | 16.7749 | 14.1561 | 14.0701 | 14.7627 | 13.6751 | 17.0576 |
| ARFGEF1  | 15.1379 | 13.7149 | 14.8001 | 13.0157 | 15.9108 | 14.7161 |
| ARFIP1   | 19.9643 | 18.7396 | 18.6333 | 18.0027 | 19.3281 | 19.6548 |
| ARG2     | 16.7437 | 19.25   | 16.6429 | 16.1058 | 19.7467 | 18.9033 |
| ARHGAP1  | 21.9833 | 22.3787 | 20.8663 | 20.8254 | 22.9672 | 22.8049 |
| ARHGAP17 | 21.2195 | 20.1635 | 20.3235 | 19.9364 | 20.0553 | 19.739  |
| ARHGAP18 | 17.8952 | 18.0943 | 16.487  | 15.169  | 19.553  | 19.1949 |
| ARHGAP35 | 18.6143 | 15.9752 | 16.5135 | 15.8047 | 16.685  | 16.2433 |
| ARHGDI1A | 24.6932 | 24.1301 | 22.8705 | 22.9977 | 24.2889 | 25.6068 |
| ARHGEF1  | 20.7781 | 20.4479 | 19.8467 | 20.1746 | 20.8293 | 20.7205 |
| ARHGEF2  | 20.2876 | 20.4302 | 19.9268 | 20.146  | 20.1949 | 20.7492 |
| ARID1A   | 18.1238 | 19.0422 | 18.7606 | 18.9786 | 19.0942 | 18.307  |
| ARL1     | 20.3634 | 21.3906 | 20.6442 | 20.6052 | 21.6399 | 20.4731 |
| ARL2     | 18.777  | 18.6725 | 18.7045 | 18.9586 | 17.9303 | 17.8411 |
| ARL3     | 20.0959 | 19.8648 | 20.1385 | 20.1771 | 20.2643 | 20.695  |
| ARL6IP5  | 21.635  | 21.9466 | 21.3762 | 21.6444 | 22.0199 | 21.4002 |
| ARL8B    | 19.3211 | 20.7428 | 19.8383 | 19.9661 | 21.2111 | 20.604  |
| ARMC10   | 15.9375 | 15.4707 | 17.8774 | 18.2579 | 14.9568 | 18.0756 |
| ARMC2    | 16.751  | 15.771  | 18.0545 | 16.7497 | 17.31   | 15.7486 |
| ARMC6    | 18.4551 | 18.0522 | 17.3186 | 17.3262 | 18.2084 | 19.4788 |
| ARMCX3   | 18.849  | 20.5562 | 18.6871 | 18.253  | 21.2361 | 18.8785 |
| ARMT1    | 18.8479 | 18.1061 | 18.4407 | 18.4488 | 17.7892 | 18.8669 |
| ARPC1A   | 22.0285 | 22.4034 | 21.643  | 21.7959 | 22.4822 | 23.0439 |
| ARPC1B   | 23.3753 | 23.4732 | 23.0484 | 22.9187 | 24.096  | 23.3644 |
| ARPC2    | 23.9154 | 23.9612 | 23.7341 | 23.4943 | 24.3968 | 24.4115 |
| ARPC3    | 24.1781 | 24.3472 | 23.5014 | 22.8631 | 25.18   | 24.0432 |
| ARPC4    | 23.9913 | 24.2796 | 24.1224 | 23.9626 | 24.7888 | 24.4315 |
| ARRB1    | 16.4108 | 15.946  | 16.3859 | 16.5913 | 14.9351 | 14.2012 |
| ARSA     | 19.2984 | 18.1302 | 18.5011 | 18.8281 | 15.1905 | 14.2783 |
| ARSB     | 19.1303 | 19.5318 | 17.7805 | 17.2265 | 19.6829 | 16.7321 |
| ASAH1    | 20.3787 | 19.9874 | 19.8069 | 19.9841 | 19.3907 | 19.7468 |
| ASCC2    | 19.6019 | 19.0567 | 18.7094 | 19.244  | 19.069  | 19.3655 |
| ASCC3    | 17.2802 | 17.3933 | 17.3694 | 16.9684 | 18.2049 | 18.0485 |
| ASF1A    | 17.0221 | 16.4294 | 17.794  | 18.1052 | 15.3813 | 18.6412 |
| ASF1B    | 18.7257 | 17.4131 | 18.6292 | 18.8339 | 16.6119 | 16.8948 |
| ASH2L    | 20.2009 | 19.9563 | 20.4296 | 20.3034 | 19.3323 | 20.0648 |
| ASL      | 19.3296 | 18.6905 | 17.7376 | 17.2762 | 19.4909 | 19.088  |
| ASNA1    | 23.2823 | 22.5565 | 22.2737 | 22.4788 | 22.7096 | 23.0041 |
| ASNS     | 20.6607 | 19.2464 | 20.5676 | 20.0815 | 20.513  | 21.9689 |
| ASPH     | 23.2526 | 24.1728 | 24.5493 | 24.6642 | 23.9689 | 23.0044 |
| ASPSCR1  | 19.1135 | 17.9764 | 16.2358 | 16.1739 | 18.1868 | 19.3674 |
| ASUN     | 16.8537 | 17.1504 | 17.7372 | 17.8853 | 15.751  | 15.8197 |
| ATAD1    | 20.2436 | 20.6293 | 20.569  | 20.7361 | 20.9008 | 20.2871 |
| ATAD2    | 19.14   | 17.7255 | 19.5807 | 19.2507 | 17.1842 | 18.1428 |
| ATAD3A   | 21.3811 | 21.5989 | 21.7525 | 22.1373 | 21.6717 | 21.8655 |
| ATAD3B   | 20.5175 | 20.578  | 20.8258 | 21.1326 | 20.7602 | 21.3225 |
| ATG3     | 20.7747 | 19.6216 | 19.2935 | 18.8708 | 20.114  | 20.2095 |
| ATG5     | 14.6393 | 14.0721 | 14.4887 | 11.8637 | 14.7123 | 16.9878 |

|          |         |         |         |         |         |         |
|----------|---------|---------|---------|---------|---------|---------|
| ATG7     | 18.9401 | 20.8545 | 18.9459 | 18.5353 | 21.6145 | 19.8712 |
| ATG9A    | 18.2642 | 17.5419 | 17.7078 | 17.7941 | 16.6491 | 18.2465 |
| ATIC     | 25.343  | 24.6607 | 23.672  | 23.3867 | 25.0493 | 25.321  |
| ATL2     | 19.5741 | 19.5008 | 20.3604 | 20.0169 | 19.5222 | 19.5797 |
| ATL3     | 24.4784 | 24.3325 | 23.6975 | 23.6461 | 24.2402 | 23.0563 |
| ATP13A1  | 23.4374 | 22.7379 | 22.547  | 22.4948 | 22.2562 | 24.1054 |
| ATP1A1   | 24.4108 | 25.6692 | 25.6754 | 25.7827 | 25.6659 | 25.2527 |
| ATP1A2   | 19.9474 | 21.0162 | 20.9258 | 20.6208 | 20.4382 | 19.7964 |
| ATP1B1   | 19.7233 | 20.3219 | 22.0036 | 21.9036 | 20.6717 | 21.4599 |
| ATP1B3   | 23.2414 | 24.6948 | 24.2785 | 24.2555 | 24.6215 | 23.9247 |
| ATP2A2   | 24.5559 | 24.8903 | 24.5967 | 24.8996 | 24.92   | 23.9083 |
| ATP2B1   | 20.0717 | 22.8485 | 20.1373 | 20.0591 | 22.5308 | 20.7364 |
| ATP2B4   | 16.5032 | 16.7839 | 16.4928 | 16.2109 | 17.4395 | 15.3975 |
| ATP2C1   | 19.2073 | 20.3459 | 19.4422 | 19.7765 | 20.2329 | 19.7707 |
| ATP5A1   | 27.8629 | 27.8807 | 28      | 28.2058 | 27.841  | 27.1509 |
| ATP5B    | 27.2846 | 27.1917 | 27.5235 | 27.8902 | 27.1493 | 26.8336 |
| ATP5C1   | 23.0902 | 23.3773 | 23.6523 | 23.9483 | 23.3685 | 23.2605 |
| ATP5F1   | 22.467  | 23.1437 | 23.3859 | 23.5734 | 23.2394 | 22.3217 |
| ATP5H    | 22.3472 | 22.2324 | 22.644  | 22.8678 | 22.1553 | 21.8282 |
| ATP5I    | 21.7707 | 21.9675 | 22.0627 | 22.2164 | 21.9686 | 20.9643 |
| ATP5J2   | 20.4366 | 21.1457 | 21.0525 | 21.0787 | 21.2741 | 20.4333 |
| ATP5L    | 22.1261 | 22.6293 | 23.0458 | 23.1103 | 22.7099 | 21.8229 |
| ATP5O    | 23.9209 | 24.2699 | 24.3315 | 24.5743 | 24.1822 | 23.4654 |
| ATP6AP1  | 20.3538 | 20.1168 | 19.761  | 19.8056 | 20.7064 | 20.4448 |
| ATP6AP2  | 19.3756 | 19.1311 | 19.7188 | 19.4915 | 19.2936 | 19.8988 |
| ATP6V0A1 | 19.7378 | 20.0308 | 19.0699 | 19.1618 | 20.0561 | 18.44   |
| ATP6V0A2 | 18.0896 | 17.6727 | 17.2469 | 17.2759 | 17.8164 | 17.0302 |
| ATP6V0D1 | 21.9376 | 22.0081 | 21.8152 | 21.9472 | 21.778  | 21.2727 |
| ATP6V1A  | 24.1648 | 23.7438 | 23.2035 | 23.2931 | 23.5731 | 23.4985 |
| ATP6V1B2 | 24.3112 | 23.9815 | 23.408  | 23.316  | 23.8574 | 23.7258 |
| ATP6V1C1 | 20.8517 | 20.8685 | 20.9281 | 20.4027 | 20.9655 | 21.1629 |
| ATP6V1E1 | 20.9584 | 21.1091 | 19.686  | 20.2987 | 20.7111 | 20.5219 |
| ATP6V1F  | 15.9362 | 16.491  | 17.4467 | 17.2158 | 16.3159 | 15.924  |
| ATP6V1H  | 20.8791 | 20.6722 | 20.0121 | 20.004  | 20.5533 | 20.294  |
| ATPAF1   | 19.3443 | 19.0457 | 20.4643 | 20.1224 | 18.9219 | 19.6979 |
| ATPAF2   | 18.0112 | 17.6698 | 18.1087 | 18.196  | 16.9651 | 16.8999 |
| ATRX     | 16.0885 | 16.6077 | 16.9864 | 17.3644 | 16.4008 | 11.8893 |
| ATXN10   | 21.1844 | 20.8931 | 21.0186 | 20.6959 | 21.013  | 21.5938 |
| ATXN2    | 16.761  | 15.3541 | 16.6006 | 16.5287 | 16.1948 | 14.8807 |
| ATXN2L   | 21.7249 | 20.6405 | 21.309  | 21.0053 | 21.2544 | 21.5728 |
| AUP1     | 18.8855 | 18.4519 | 20.4279 | 20.5086 | 18.935  | 19.786  |
| AURKB    | 19.7712 | 19.6531 | 20.4636 | 20.4206 | 19.5097 | 19.4612 |
| AVL9     | 21.882  | 22.1561 | 20.4237 | 19.9413 | 22.7643 | 21.4211 |
| AXL      | 18.4449 | 20.4428 | 20.5041 | 20.4805 | 20.524  | 20.3956 |
| B2M      | 23.6204 | 23.7692 | 23.9743 | 24.1954 | 22.6936 | 21.9982 |
| B4GALNT1 | 18.8016 | 22.3755 | 18.8347 | 18.8358 | 23.065  | 18.1081 |
| B4GALT1  | 18.2023 | 18.3766 | 19.3364 | 18.7224 | 19.2177 | 20.6868 |
| BAG2     | 21.1322 | 21.0061 | 21.9073 | 22.0351 | 20.6589 | 22.4581 |
| BAG5     | 17.0522 | 16.4509 | 15.5486 | 14.3294 | 16.263  | 16.6492 |
| BAG6     | 20.9595 | 20.4329 | 20.5164 | 20.3135 | 20.8154 | 20.7764 |
| BAIAP2   | 15.7021 | 14.101  | 19.3038 | 19.1829 | 15.0373 | 18.9458 |
| BAK1     | 16.7583 | 18.1922 | 17.6462 | 18.8333 | 17.1607 | 17.9895 |

|           |         |         |         |         |         |         |
|-----------|---------|---------|---------|---------|---------|---------|
| BANF1     | 19.9095 | 19.907  | 19.3936 | 20.1195 | 19.7567 | 19.1055 |
| BASP1     | 17.3005 | 20.2117 | 19.7794 | 19.4077 | 20.918  | 16.6022 |
| BCAP31    | 21.2792 | 22.1527 | 21.5682 | 22.2199 | 22.1714 | 21.8527 |
| BCAR1     | 19.3993 | 18.539  | 19.4391 | 19.3386 | 17.7663 | 19.4443 |
| BCAS2     | 16.8782 | 18.4576 | 18.8928 | 18.8888 | 18.0511 | 17.6314 |
| BCAT1     | 17.8313 | 21.4801 | 20.1076 | 19.9103 | 21.5725 | 20.9351 |
| BCAT2     | 19.426  | 19.8863 | 20.9924 | 21.3953 | 19.4647 | 21.053  |
| BCCIP     | 19.357  | 19.628  | 20.1388 | 19.7093 | 19.2483 | 20.2679 |
| BCKDHB    | 18.4033 | 18.7351 | 18.7053 | 19.0239 | 18.1711 | 18.1345 |
| BCL2L13   | 20.4139 | 18.8253 | 20.0153 | 19.9499 | 18.8437 | 19.6716 |
| BCLAF1    | 21.8712 | 21.6881 | 22.169  | 22.3043 | 22.1234 | 21.8117 |
| BCS1L     | 18.3679 | 19.3574 | 20.0809 | 20.1408 | 18.9723 | 19.6385 |
| BDH1      | 15.6558 | 17.8703 | 17.6423 | 17.9598 | 17.3549 | 18.009  |
| BET1      | 18.8924 | 19.3058 | 19.1048 | 19.4845 | 19.8943 | 17.1966 |
| BID       | 15.9628 | 17.5786 | 18.359  | 18.2445 | 17.5283 | 17.7872 |
| BIN1      | 20.3769 | 18.449  | 19.4781 | 19.2795 | 19.0617 | 17.4607 |
| BLMH      | 21.8184 | 20.4017 | 21.1412 | 21.0257 | 20.6054 | 22.6522 |
| BLVRA     | 23.7781 | 21.3157 | 22.1984 | 22.0215 | 21.3326 | 20.9678 |
| BLVRB     | 22.6775 | 19.6526 | 21.6569 | 21.6278 | 19.9404 | 19.5512 |
| BMP2K     | 17.4713 | 17.4435 | 17.6582 | 17.4731 | 16.9834 | 16.0841 |
| BOP1      | 21.3361 | 22.1806 | 22.5964 | 22.4372 | 22.1045 | 22.7342 |
| BPNT1     | 19.8443 | 18.6674 | 18.7096 | 17.8442 | 19.3032 | 20.0036 |
| BRAT1     | 18.4404 | 18.3773 | 17.8394 | 18.0175 | 17.7264 | 19.3474 |
| BRD4      | 17.9451 | 18.6431 | 18.7189 | 18.5581 | 19.0541 | 17.9778 |
| BRE       | 18.7102 | 18.6484 | 18.3271 | 18.3992 | 18.3043 | 18.9474 |
| BRI3      | 14.6612 | 16.6592 | 14.6128 | 14.8021 | 15.0181 | NA      |
| BRIX1     | 17.5429 | 18.6031 | 20.4424 | 19.9256 | 18.8579 | 20.5986 |
| BROX      | 19.5506 | 18.5675 | 18.6244 | 18.224  | 19.4036 | 19.4981 |
| BSG       | 23.8753 | 24.1944 | 23.6733 | 24.033  | 24.4176 | 24.6929 |
| BTF3      | 21.5058 | 20.9241 | 21.6059 | 21.337  | 20.5214 | 22.0395 |
| BTN3A3    | 18.6719 | 19.7131 | 18.652  | 18.6565 | 19.5015 | 17.07   |
| BUB3      | 22.9796 | 23.0132 | 23.0337 | 22.8539 | 23.1336 | 23.0248 |
| BUD31     | 19.918  | 20.5231 | 20.002  | 20.2501 | 20.4468 | 20.038  |
| BYSL      | 22.1651 | 20.9608 | 21.0841 | 21.5294 | 20.7187 | 21.3638 |
| BZW1      | 22.0662 | 21.6548 | 21.5909 | 21.0747 | 22.4414 | 22.5084 |
| BZW2      | 20.6921 | 21.0597 | 21.4356 | 21.3782 | 21.1679 | 22.2697 |
| C11orf68  | 20.566  | 19.889  | 19.3745 | 18.9772 | 20.1412 | 19.0972 |
| C12orf10  | 21.1708 | 21.0487 | 20.5888 | 20.3464 | 21.4103 | 20.8067 |
| C14orf1   | 14.8843 | 16.0128 | 15.6586 | 16.0414 | 15.7982 | 14.9885 |
| C14orf159 | 17.0227 | 17.0626 | 15.1087 | 14.9014 | 16.5586 | 13.3384 |
| C14orf166 | 21.8454 | 22.1088 | 21.5618 | 21.5384 | 22.0529 | 21.4224 |
| C16orf58  | 18.0999 | 17.5451 | 19.3114 | 19.2258 | 17.7443 | 17.8718 |
| C16orf62  | 15.8911 | 15.9848 | 15.8726 | 14.8807 | 14.2427 | 10.3691 |
| C19orf70  | 19.9895 | 20.5351 | 20.4155 | 20.7804 | 20.117  | 20.1153 |
| C1orf27   | 18.5947 | 18.7349 | 19.2797 | 19.1341 | 19.2281 | 18.9361 |
| C1QBP     | 23.1933 | 23.3109 | 25.2988 | 25.2118 | 23.2923 | 24.9074 |
| C21orf33  | 20.1694 | 18.726  | 19.5101 | 18.991  | 18.538  | 18.5254 |
| C2CD2     | 13.6804 | 14.822  | 16.6172 | 16.8749 | 12.6354 | 14.0588 |
| C3        | 17.9348 | 21.3989 | 20.2258 | 19.2743 | 21.1869 | 18.033  |
| C7orf50   | 17.5158 | 17.1832 | 19.4691 | 19.7074 | 16.4779 | 20.7017 |
| C8orf82   | 17.1622 | 17.2821 | 17.9566 | 17.9166 | 16.4517 | 17.6054 |
| CA9       | 17.816  | 17.1921 | 17.5363 | 18.0655 | 17.6779 | 21.9527 |

|         |         |         |         |         |         |         |
|---------|---------|---------|---------|---------|---------|---------|
| CAB39   | 17.8422 | 19.1265 | 17.8042 | 18.1375 | 18.0251 | 17.4578 |
| CACYBP  | 23.8509 | 23.5737 | 24.0782 | 23.8239 | 23.9847 | 25.0232 |
| CAD     | 22.768  | 22.0053 | 21.7491 | 21.5562 | 22.5983 | 22.9905 |
| CALD1   | 25.5792 | 23.2313 | 23.4896 | 24.0531 | 23.6256 | 24.3256 |
| CALR    | 27.5888 | 28.0807 | 27.9056 | 27.9163 | 27.723  | 27.0741 |
| CALU    | 23.7267 | 23.4103 | 23.7345 | 23.6974 | 23.225  | 22.6568 |
| CAMK1   | 15.9012 | 15.3365 | 13.9615 | 15.2241 | 15.4758 | 16.6099 |
| CAMK2D  | 18.0184 | 12.0613 | 11.4898 | NA      | 13.949  | 16.5947 |
| CAND1   | 24.4812 | 24.1577 | 24.1125 | 23.5809 | 24.4457 | 24.3156 |
| CANT1   | 15.7255 | 16.967  | 17.3205 | 17.3768 | 17.5586 | 18.0085 |
| CANX    | 27.2245 | 26.7883 | 27.9521 | 27.7924 | 26.917  | 26.766  |
| CAP1    | 25.6053 | 24.5538 | 23.8797 | 23.5097 | 25.3602 | 25.6033 |
| CAP2    | 23.7592 | 23.8962 | 23.2061 | 22.8336 | 24.5178 | 23.8712 |
| CAPG    | 17.7453 | 20.8171 | 15.6338 | 15.6325 | 21.2243 | 16.7164 |
| CAPN1   | 21.6301 | 20.8802 | 20.4898 | 19.9664 | 21.5648 | 19.6095 |
| CAPN2   | 24.8439 | 24.4782 | 23.4886 | 23.1408 | 25.1303 | 24.6935 |
| CAPN5   | 18.2529 | 18.8959 | 18.7339 | 18.5878 | 18.8503 | 18.056  |
| CAPNS1  | 22.7806 | 22.9353 | 22.0589 | 21.7229 | 23.6405 | 22.6604 |
| CAPRIN1 | 22.4418 | 22.2395 | 22.4824 | 22.6245 | 22.3799 | 23.0608 |
| CAPS    | 20.7638 | 19.5737 | 19.0798 | 18.9343 | 20.3328 | 25.0153 |
| CAPZA1  | 24.3033 | 23.8567 | 23.6572 | 23.5133 | 24.1872 | 24.4367 |
| CAPZA2  | 23.32   | 22.9049 | 22.0593 | 22.0507 | 22.9183 | 22.8337 |
| CAPZB   | 24.9238 | 24.7847 | 24.2267 | 24.0693 | 25.1476 | 24.9034 |
| CARM1   | 21.6604 | 21.6479 | 21.4924 | 21.2612 | 22.1739 | 21.9713 |
| CARS    | 22.1663 | 20.6818 | 21.1245 | 20.4801 | 21.641  | 21.9751 |
| CARS2   | 19.0299 | 20.5168 | 20.5041 | 20.319  | 20.889  | 20.1415 |
| CASK    | 20.9923 | 18.4777 | 18.53   | 18.9426 | 18.7652 | 19.0699 |
| CASP1   | 22.7635 | 21.7439 | 21.294  | 21.4593 | 21.9019 | 21.1063 |
| CASP4   | 17.943  | 17.2708 | 16.3603 | 15.7425 | 17.9857 | 15.6447 |
| CASP8   | 16.4015 | 17.3177 | 15.9715 | 15.4134 | 16.754  | 15.0423 |
| CAST    | 20.4507 | 17.3587 | 18.8462 | 17.9726 | 18.264  | 20.7838 |
| CAT     | 22.8324 | 22.3356 | 22.3745 | 22.4436 | 22.1042 | 23.1993 |
| CAV1    | 22.7741 | 24.7292 | 22.8985 | 23.0969 | 24.733  | 22.5535 |
| CAV2    | 19.8337 | 20.2449 | 18.9329 | 18.0379 | 20.9382 | 19.211  |
| CBFB    | 20.0353 | 19.0427 | 18.9183 | 19.4856 | 19.7183 | 20.6057 |
| CBL     | 17.9505 | 16.8451 | 17.0042 | 17.1198 | 17.9643 | 16.7518 |
| CBR1    | 24.2208 | 21.904  | 21.6337 | 21.6219 | 21.8984 | 23.6661 |
| CBR3    | 22.5315 | 18.2842 | 19.6908 | 19.0599 | 18.9671 | 19.3887 |
| CBS     | 18.4379 | 18.2125 | 20.03   | 19.275  | 18.7701 | 20.2883 |
| CBX1    | 19.4174 | 19.783  | 20.25   | 20.1257 | 19.6735 | 19.4253 |
| CBX3    | 23.2248 | 23.3734 | 23.567  | 23.5443 | 23.3459 | 23.6539 |
| CBX5    | 21.577  | 20.8842 | 21.6378 | 21.7473 | 21.084  | 21.0765 |
| CCAR1   | 21.3993 | 21.5981 | 21.4615 | 21.6356 | 21.5711 | 21.0136 |
| CCAR2   | 23.3416 | 22.7588 | 23.527  | 23.6722 | 22.524  | 23.3613 |
| CCBL2   | 19.8709 | 19.3399 | 18.3054 | 18.4524 | 19.5796 | 20.4527 |
| CCDC124 | 18.9456 | 16.8256 | 17.9883 | 18.0858 | 17.1013 | 19.8239 |
| CCDC134 | 19.6298 | 19.9123 | 20.2508 | 20.4976 | 19.7165 | 18.0136 |
| CCDC22  | 20.1036 | 19.0403 | 19.4887 | 18.7651 | 19.9019 | 19.469  |
| CCDC47  | 22.6902 | 22.6342 | 22.399  | 22.5309 | 22.698  | 23.1025 |
| CCDC51  | 17.3138 | 17.7604 | 18.5334 | 18.6591 | 17.8856 | 18.9609 |
| CCDC58  | 19.9792 | 19.7934 | 20.1288 | 20.4034 | 20.0516 | 20.0456 |
| CCDC90B | 16.9508 | 17.097  | 17.7551 | 17.8864 | 17.1186 | 14.3743 |



|          |         |         |         |         |         |         |
|----------|---------|---------|---------|---------|---------|---------|
| CCNH     | 17.0715 | 18.3953 | 17.6804 | 17.4189 | 18.0903 | 16.2398 |
| CCNK     | 19.3661 | 20.1358 | 19.7138 | 19.5022 | 20.3043 | 19.9364 |
| CCNYL1   | 17.7171 | 18.167  | 17.8496 | 17.5424 | 18.2765 | 16.7233 |
| CCT2     | 25.7945 | 25.1924 | 25.4791 | 25.5907 | 24.9539 | 26.184  |
| CCT3     | 26.3128 | 25.7695 | 25.9843 | 26.0036 | 25.9785 | 26.7843 |
| CCT4     | 25.6421 | 25.2713 | 25.6098 | 25.5564 | 25.2645 | 26.5186 |
| CCT5     | 25.4351 | 24.8094 | 25.1236 | 25.2194 | 24.7409 | 25.8888 |
| CCT6A    | 25.8092 | 25.3086 | 25.6049 | 25.6632 | 25.2313 | 26.2792 |
| CCT7     | 25.3563 | 25.084  | 25.2886 | 25.3369 | 25.1348 | 26.2399 |
| CCT8     | 26.4078 | 25.8333 | 26.1346 | 26.0861 | 26.0582 | 26.842  |
| CD109    | 22.7007 | 22.1336 | 22.6028 | 22.1506 | 22.1739 | 21.7853 |
| CD151    | 20.703  | 21.5066 | 21.0353 | 21.034  | 21.5559 | 20.5509 |
| CD276    | 20.0469 | 19.5346 | 19.5583 | 20.0042 | 19.2235 | 19.5681 |
| CD2AP    | 17.1025 | 16.7089 | 17.3403 | 16.719  | 17.1435 | 17.983  |
| CD2BP2   | 18.0117 | 17.9417 | 18.6035 | 18.8945 | 18.1465 | 18.4866 |
| CD44     | 23.8442 | 24.0279 | 25.0242 | 24.8225 | 24.1741 | 23.6736 |
| CD47     | 21.9839 | 22.9222 | 22.4537 | 22.6633 | 23.1819 | 21.8996 |
| CD59     | 21.7318 | 23.1675 | 21.6119 | 21.7015 | 23.8312 | 21.5729 |
| CD63     | 21.0089 | 21.4    | 18.7101 | 20.1904 | 20.9091 | 17.7245 |
| CD74     | 14.251  | 15.1688 | 14.8168 | 13.4128 | 14.5942 | 14.6598 |
| CD81     | 22.3574 | 22.9353 | 22.7398 | 23.0005 | 22.3216 | 21.5928 |
| CD82     | 17.9731 | 20.2955 | 19.6012 | 18.1142 | 20.5898 | 15.5739 |
| CD9      | 20.6626 | 18.067  | 20.8288 | 21.4509 | 19.2942 | 20.1429 |
| CDC123   | 17.7129 | 17.2839 | 17.954  | 17.8459 | 17.7419 | 18.4919 |
| CDC16    | 16.4092 | 15.2463 | 16.1737 | 15.9617 | 16.0405 | 15.7816 |
| CDC23    | 20.0195 | 19.8575 | 19.9366 | 19.758  | 20.0875 | 19.7654 |
| CDC27    | 16.7001 | 16.9713 | 18.0095 | 17.6403 | 16.3193 | 17.3832 |
| CDC37    | 20.6611 | 21.2084 | 20.1765 | 20.2692 | 21.137  | 22.0479 |
| CDC40    | 18.2451 | 19.1912 | 19.0226 | 19.4638 | 19.1389 | 19.5061 |
| CDC42    | 22.8892 | 23.7824 | 23.7253 | 23.824  | 23.4958 | 23.8088 |
| CDC42BPB | 19.3397 | 19.8268 | 18.575  | 18.5409 | 20.0932 | 17.9137 |
| CDC5L    | 21.4383 | 21.5879 | 22.1958 | 22.2822 | 21.7795 | 22.0921 |
| CDC73    | 20.3277 | 20.4627 | 20.9069 | 20.8321 | 20.3173 | 20.5341 |
| CDCP1    | 15.5218 | 21.397  | 13.4112 | 16.3124 | 22.3343 | 15.3503 |
| CDH11    | 17.0224 | 15.8467 | 16.6535 | 16.779  | 15.8706 | 14.9967 |
| CDH13    | 14.549  | 20.9162 | 17.8507 | 18.0497 | 21.4365 | 16.9048 |
| CDH2     | 17.4248 | 18.1179 | 18.9298 | 18.7097 | 18.6438 | 18.562  |
| CDH6     | 16.3488 | 11.9962 | 18.9949 | 18.8826 | 13.6658 | 16.2007 |
| CDIPT    | 17.8728 | 17.2137 | 17.3981 | 18.3623 | 16.22   | 16.9621 |
| CDK1     | 21.1815 | 20.1442 | 21.0411 | 20.7368 | 20.4147 | 21.8217 |
| CDK11A   | 20.5166 | 21.1236 | 20.5672 | 20.432  | 21.3734 | 20.8717 |
| CDK13    | 15.9875 | 17.9316 | 17.1543 | 17.2377 | 16.963  | 13.6922 |
| CDK2     | 19.1078 | 18.3763 | 18.8562 | 18.911  | 18.038  | 19.0193 |
| CDK4     | 21.2737 | 26.1402 | 20.9803 | 21.0174 | 25.9846 | 20.8954 |
| CDK5     | 19.5765 | 18.7401 | 18.774  | 18.9272 | 18.8763 | 20.0657 |
| CDK5RAP1 | 16.1615 | 15.9952 | 17.9132 | 17.3453 | 16.1571 | 16.353  |
| CDK5RAP3 | 20.1919 | 20.2415 | 20.3779 | 20.2275 | 20.3927 | 19.7913 |
| CDK6     | 26.5082 | 21.2058 | 21.8027 | 21.6015 | 21.8737 | 22.7233 |
| CDK9     | 15.6541 | 18.6037 | 18.6567 | 18.406  | 18.7378 | 18.5653 |
| CDKN2A   | 20.8732 | 20.077  | 11.7085 | 10.3823 | 20.251  | 12.0221 |
| CDS2     | 16.9668 | 17.5923 | 18.949  | 18.9743 | 17.0312 | 16.2858 |
| CDV3     | 19.2204 | 15.8142 | 17.5618 | 17.59   | 18.1754 | 18.8829 |

|          |         |         |         |         |         |         |
|----------|---------|---------|---------|---------|---------|---------|
| CEBPZ    | 15.7478 | 17.1099 | 17.7325 | 17.6079 | 17.8072 | 17.9804 |
| CECR5    | 25.2897 | 23.4447 | 23.8346 | 23.6547 | 24.043  | 25.1455 |
| CELF1    | 21.5015 | 21.6187 | 21.6815 | 21.7953 | 21.3101 | 21.6456 |
| CENPB    | 21.4046 | 19.5564 | 22.2576 | 21.4621 | 18.8256 | 18.0269 |
| CEP41    | 18.9971 | 17.3813 | 17.2931 | 17.5655 | 17.1444 | 16.731  |
| CERS2    | 21.6958 | 20.9343 | 21.9128 | 21.9466 | 20.9763 | 21.3837 |
| CES1     | 16.3557 | 16.3089 | 18.1226 | 18.3191 | 16.3984 | 16.8706 |
| CFL1     | 26.5429 | 26.2798 | 25.7226 | 25.8442 | 25.9374 | 26.3881 |
| CFL2     | 21.8792 | 22.2476 | 20.1681 | 20.1439 | 22.3148 | 21.1749 |
| CHAF1A   | 16.8735 | 15.8669 | 17.7998 | 18.0027 | 14.757  | 16.4767 |
| CHAF1B   | 17.0053 | 16.4029 | 17.4815 | 17.9754 | 15.9982 | 16.9992 |
| CHAMP1   | 18.5309 | 18.5995 | 19.3413 | 19.494  | 18.9196 | 19.3551 |
| CHCHD2P9 | 16.7426 | 12.6951 | 17.9459 | 17.9962 | 13.6755 | 16.8212 |
| CHCHD3   | 21.64   | 21.638  | 21.8914 | 22.2242 | 21.8656 | 22.139  |
| CHD1     | NA      | 13.1641 | 16.8456 | 16.9851 | 15.3762 | 17.2819 |
| CHD4     | 19.7346 | 21.7452 | 20.8835 | 21.1381 | 21.792  | 20.8025 |
| CHERP    | 19.9761 | 20.826  | 20.221  | 20.3075 | 20.54   | 20.1576 |
| CHID1    | 17.9242 | 18.9239 | 20.4844 | 20.6425 | 18.0167 | 19.3062 |
| CHL1     | 19.5157 | 11.6164 | 13.721  | 13.5663 | 11.4459 | 11.9356 |
| CHMP5    | 18.1275 | 16.6939 | 16.1222 | 15.6138 | 17.8664 | 19.1584 |
| CHORDC1  | 21.6051 | 21.3609 | 22.3057 | 21.8843 | 22.3251 | 22.4421 |
| CHST14   | 17.9007 | 18.4321 | 17.8751 | 18.3956 | 18.4174 | 17.4604 |
| CHTF18   | 12.1837 | 13.5848 | 14.7701 | 14.596  | 11.2651 | 13.1879 |
| CHUK     | 16.9039 | 13.5323 | 15.8173 | 14.9459 | 15.5268 | 18.134  |
| CIAO1    | 18.5946 | 18.0556 | 18.2925 | 17.9106 | 18.3294 | 20.0056 |
| CIAPIN1  | 21.5992 | 18.9276 | 20.6922 | 20.4004 | 19.6608 | 22.486  |
| CIRBP    | 20.7803 | 20.7915 | 20.5176 | 20.6421 | 20.0653 | 20.6086 |
| CISD2    | 21.5655 | 21.6696 | 22.1053 | 22.2197 | 22.0813 | 21.9358 |
| CIT      | 16.2859 | 14.8195 | 16.4681 | 16.9794 | 15.3391 | 12.235  |
| CKAP4    | 27.0527 | 28.09   | 27.1723 | 27.1632 | 28.4094 | 26.4988 |
| CKAP5    | 20.7853 | 21.5914 | 21.0842 | 20.8048 | 22.0167 | 22.0366 |
| CKB      | 23.1206 | 20.5964 | 20.173  | 20.4826 | 20.6302 | 24.8517 |
| CKMT1A   | 15.9955 | 14.0086 | 16.7218 | 12.9574 | 14.6339 | 19.1367 |
| CLASP1   | 19.4596 | 18.3421 | 19.6306 | 19.0078 | 18.5128 | 18.0599 |
| CLCC1    | 18.3965 | 17.2344 | 18.9421 | 18.7088 | 17.0869 | 18.7751 |
| CLCN7    | 18.06   | 18.3332 | 17.7046 | 18.3498 | 17.5887 | 17.3521 |
| CLIC1    | 25.7774 | 25.1631 | 24.4116 | 24.1641 | 25.5876 | 26.0073 |
| CLIC4    | 23.3968 | 23.5588 | 22.774  | 22.7401 | 24.1718 | 23.7794 |
| CLINT1   | 21.0649 | 20.6188 | 21.0211 | 21.0427 | 21.4004 | 21.8384 |
| CLIP1    | 18.6177 | 16.1266 | 16.1806 | 16.3132 | 16.5761 | 16.8253 |
| CLIP2    | 19.2496 | 18.4234 | 18.068  | 17.986  | 18.7321 | 17.9624 |
| CLPB     | 21.2705 | 21.7042 | 21.6126 | 21.5916 | 22.0317 | 21.2222 |
| CLPP     | 18.9608 | 19.3359 | 19.319  | 19.8948 | 19.991  | 20.5968 |
| CLPTM1   | 18.9756 | 19.7823 | 20.2549 | 20.175  | 19.4105 | 19.11   |
| CLPTM1L  | 18.5204 | 19.3352 | 19.1154 | 19.1477 | 18.3866 | 19.6226 |
| CLPX     | 21.9055 | 22.3307 | 22.456  | 22.6837 | 22.4534 | 22.4812 |
| CLTA     | 19.2323 | 18.7268 | 18.226  | 18.3902 | 19.3332 | 19.6605 |
| CLTC     | 28.5916 | 28.1713 | 27.9819 | 27.8682 | 28.3377 | 28.4978 |
| CLU      | 18.6865 | 16.6669 | 19.1621 | 18.7422 | 17.5101 | 17.4214 |
| CLUH     | 18.2644 | 17.9529 | 19.5157 | 18.9839 | 18.338  | 20.3336 |
| CMAS     | 21.1561 | 22.0663 | 22.3264 | 22.3223 | 22.1635 | 21.2932 |
| CMBL     | 21.1637 | 17.7813 | 20.4458 | 20.1259 | 18.1496 | 19.3351 |

|          |         |         |         |         |         |         |
|----------|---------|---------|---------|---------|---------|---------|
| CMPK1    | 19.7393 | 18.3457 | 18.7408 | 18.8782 | 17.1548 | 18.9537 |
| CMTR1    | 19.5669 | 19.8758 | 19.0678 | 18.9294 | 19.4637 | 19.0952 |
| CNBP     | 21.6865 | 21.5229 | 21.1765 | 21.3555 | 21.9064 | 21.7377 |
| CNDP2    | 24.1926 | 22.6996 | 22.6902 | 22.6323 | 22.8263 | 22.0418 |
| CNN2     | 22.4898 | 22.8805 | 20.8313 | 21.5438 | 22.274  | 22.2203 |
| CNN3     | 22.4803 | 21.28   | 21.921  | 22.0087 | 20.8568 | 24.381  |
| CNOT1    | 20.074  | 20.0619 | 20.1951 | 20.2395 | 20.1554 | 19.8039 |
| CNOT7    | 17.8651 | 17.809  | 17.975  | 17.851  | 17.9025 | 16.0574 |
| CNP      | 22.3043 | 22.7736 | 22.9129 | 23.2957 | 22.6613 | 23.2664 |
| CNPY2    | 21.0828 | 21.1796 | 22.2185 | 22.3451 | 20.2762 | 20.3118 |
| CNPY3    | 19.0373 | 18.4211 | 17.9145 | 18.0265 | 19.0403 | 18.7218 |
| CNTNAP1  | 19.4706 | 21.8156 | 19.854  | 19.7176 | 21.6576 | 18.227  |
| COASY    | 17.9972 | 17.3972 | 18.1973 | 18.1989 | 17.1404 | 18.7374 |
| COG1     | 18.5265 | 17.1446 | 17.8141 | 17.4693 | 18.4892 | 18.4079 |
| COG8     | 18.0029 | 17.6738 | 17.4483 | 16.5289 | 18.1906 | 17.8027 |
| COIL     | 14.1487 | 16.4079 | 17.9247 | 17.544  | 16.9077 | 16.3601 |
| COL11A1  | 14.3558 | 15.6607 | 15.9876 | 15.3058 | 14.9773 | 18.7881 |
| COL12A1  | 19.1343 | 19.0646 | 19.7052 | 19.9868 | 19.1349 | 18.9142 |
| COL18A1  | 18.222  | 17.269  | 18.942  | 19.8526 | 16.3077 | 19.8548 |
| COL1A1   | 21.4228 | 24.0881 | 20.191  | 20.5096 | 22.119  | 20.2778 |
| COL1A2   | 21.5543 | 24.018  | 21.389  | 22.4117 | 22.5556 | 21.1243 |
| COL6A1   | 23.551  | 26.0486 | 23.2582 | 23.1494 | 25.3405 | 21.6162 |
| COL6A2   | 21.8741 | 24.7415 | 21.4654 | 21.7547 | 23.8973 | 19.8321 |
| COL6A3   | 24.4982 | 26.4953 | 27.1045 | 27.2334 | 25.3359 | 23.0893 |
| COLEC12  | 17.0768 | 18.354  | 17.7638 | 17.0829 | 18.094  | 16.2743 |
| COLGALT1 | 23.5131 | 24.9716 | 23.5362 | 23.5685 | 24.7398 | 24.3984 |
| COMMD3   | 17.765  | 17.3239 | 17.1919 | 16.8947 | 17.5286 | 17.3649 |
| COMMD4   | 17.7643 | 17.5218 | 18.0811 | 17.203  | 18.0596 | 18.0078 |
| COMMD9   | 17.4261 | 17.4524 | 17.5008 | 17.7355 | 17.3902 | 17.497  |
| COMT     | 24.0108 | 24.5993 | 23.8143 | 23.8897 | 24.2899 | 23.7167 |
| COPA     | 24.2892 | 25.0367 | 25.1001 | 24.7976 | 26.0484 | 24.8955 |
| COPB1    | 24.2563 | 24.472  | 24.1134 | 23.8471 | 25.1412 | 24.1244 |
| COPB2    | 24.9884 | 25.2467 | 24.775  | 24.3353 | 25.7065 | 24.5889 |
| COPE     | 23.3112 | 23.438  | 22.9387 | 22.8315 | 23.9749 | 23.0557 |
| COPG1    | 24.115  | 24.3218 | 24.0877 | 23.7071 | 24.9291 | 23.8086 |
| COPG2    | 20.0366 | 20.2752 | 20.0831 | 20.2168 | 20.3601 | 20.7224 |
| COPS2    | 22.8904 | 22.518  | 22.6293 | 22.6257 | 22.7171 | 22.9484 |
| COPS3    | 20.363  | 20.0686 | 19.3803 | 19.6806 | 19.9989 | 20.2171 |
| COPS4    | 22.3587 | 21.7026 | 21.711  | 21.671  | 21.5974 | 21.9808 |
| COPS5    | 21.9095 | 20.6521 | 21.1705 | 20.8506 | 20.7859 | 21.281  |
| COPS6    | 22.4049 | 21.8981 | 21.5621 | 21.4754 | 22.1168 | 22.0551 |
| COPS7A   | 21.2123 | 19.751  | 19.2024 | 18.8232 | 20.193  | 19.9848 |
| COPS8    | 20.4126 | 20.7849 | 20.5048 | 20.1513 | 21.19   | 20.7707 |
| COPZ1    | 21.1785 | 21.5438 | 20.717  | 20.89   | 21.8211 | 20.6958 |
| CORO1B   | 23.3589 | 23.0074 | 22.7442 | 22.5716 | 23.2544 | 23.0327 |
| CORO1C   | 24.5067 | 24.826  | 24.5589 | 24.1906 | 25.4948 | 24.8066 |
| CORO2B   | 18.3449 | 16.2682 | 11.9097 | 11.2184 | 16.6152 | 12.6678 |
| CORO7    | 18.3181 | 15.8282 | 14.8587 | 15.4634 | 16.2994 | 16.3232 |
| COTL1    | 23.1183 | 22.8666 | 22.3377 | 22.1503 | 23.3166 | 23.7087 |
| COX11    | 16.0911 | 17.7506 | 18.478  | 18.7545 | 16.9989 | 16.8687 |
| COX4I1   | 21.9622 | 22.16   | 22.6271 | 23.131  | 22.3969 | 22.3706 |
| COX5A    | 16.3034 | 17.3895 | 17.9156 | 18.2433 | 16.6826 | 15.2421 |

|              |         |         |         |         |         |         |
|--------------|---------|---------|---------|---------|---------|---------|
| COX5B        | 21.2438 | 21.7308 | 21.6588 | 22.0253 | 21.8344 | 20.9339 |
| COX6B1       | 18.0274 | 18.7962 | 19.9265 | 20.0676 | 18.4833 | 17.7764 |
| COX6C        | 18.2118 | 19.8487 | 20.0349 | 20.4247 | 20.2508 | 19.0534 |
| CP           | 18.8449 | 12.5355 | 15.3743 | 16.216  | 11.3884 | 13.1493 |
| CPA4         | 17.159  | 19.0887 | 18.7132 | 17.8237 | 19.0851 | 18.1078 |
| CPD          | 19.6022 | 19.6976 | 21.4713 | 21.6911 | 19.5227 | 20.2609 |
| CPNE1        | 21.9251 | 22.7923 | 22.89   | 22.7754 | 22.8611 | 23.163  |
| CPNE3        | 22.32   | 21.3073 | 22.1263 | 21.7771 | 21.5195 | 23.5312 |
| CPOX         | 23.4032 | 22.5248 | 22.9675 | 23.3637 | 22.2337 | 22.0522 |
| CPQ          | 19.7206 | 17.7563 | 17.5783 | 17.2575 | 17.2799 | 16.5864 |
| CPS1         | 16.5444 | 17.7158 | 18.5362 | 18.3519 | 17.2576 | 14.8344 |
| CPSF1        | 18.9    | 19.8933 | 19.8916 | 19.7904 | 20.0368 | 19.4156 |
| CPSF2        | 20.9937 | 20.7796 | 20.7511 | 20.6968 | 20.5646 | 21.1678 |
| CPSF3        | 21.0795 | 21.1783 | 20.8519 | 20.758  | 21.2018 | 21.4682 |
| CPSF6        | 22.5814 | 22.3805 | 22.9766 | 23.5866 | 22.3249 | 22.8719 |
| CPSF7        | 22.7932 | 23.1467 | 21.8017 | 22.1845 | 23.3369 | 22.1992 |
| CPT1A        | 21.4864 | 19.6502 | 21.1792 | 20.6653 | 20.555  | 19.327  |
| CPT2         | 21.1048 | 20.9555 | 21.1136 | 21.3979 | 21.176  | 20.697  |
| CRAT         | 19.9943 | 17.2937 | 19.2375 | 19.3323 | 16.8837 | 19.2864 |
| CRELD2       | 18.9446 | 18.2985 | 18.6217 | 18.4538 | 17.9306 | 15.9542 |
| CRIP2        | 19.6938 | 19.3922 | 15.0211 | 14.9573 | 19.8048 | 19.8028 |
| CRK          | 20.2605 | 19.129  | 18.9712 | 19.076  | 19.6381 | 20.6728 |
| CRKL         | 20.5863 | 19.7624 | 20.0023 | 20.0467 | 19.9364 | 20.5418 |
| CRNKL1       | 18.6532 | 19.4964 | 19.6167 | 19.6538 | 19.3602 | 19.3299 |
| CROT         | 20.739  | 17.4522 | 21.1504 | 20.8783 | 17.2389 | 17.8467 |
| CRTAP        | 23.5678 | 24.5093 | 24.4334 | 24.7632 | 24.0519 | 23.0656 |
| CRYAB        | 20.7356 | 17.9091 | 16.8061 | 17.14   | 18.3233 | 22.0188 |
| CRYZ         | 21.6592 | 22.8342 | 22.3539 | 22.2526 | 23.1107 | 23.1689 |
| CS           | 24.7875 | 24.7075 | 25.1347 | 25.5537 | 24.8353 | 25.1315 |
| CSDE1        | 24.0237 | 23.5799 | 23.8566 | 23.8264 | 23.6759 | 25.0907 |
| CSE1L        | 24.1352 | 23.7618 | 24.9338 | 24.6718 | 24.1225 | 24.8554 |
| CSNK1D       | 17.7378 | 17.5898 | 17.1696 | 17.2923 | 18.2062 | 18.8961 |
| CSNK2A1      | 23.1353 | 23.2035 | 23.463  | 23.457  | 23.2373 | 23.0314 |
| CSNK2A2      | 20.7351 | 20.5378 | 20.8825 | 21.162  | 20.5797 | 21.4431 |
| CSNK2B       | 23.1753 | 22.5608 | 22.9283 | 22.7828 | 22.4414 | 22.9165 |
| CSPG4        | 21.9507 | 23.6154 | 21.816  | 21.6219 | 23.679  | 22.0873 |
| CSRP1        | 22.9684 | 22.9787 | 22.0892 | 22.0274 | 23.7933 | 24.355  |
| CSRP2        | 20.2841 | 16.718  | 17.646  | 17.0741 | 17.2046 | 19.3805 |
| CSTB         | 21.084  | 20.2284 | 19.4625 | 19.4856 | 20.79   | 20.3578 |
| CSTF1        | 21.2086 | 21.668  | 21.2032 | 21.6271 | 21.2445 | 21.6148 |
| CSTF2        | 20.7075 | 20.416  | 20.9621 | 20.9608 | 20.7932 | 21.6754 |
| CSTF3        | 20.8646 | 21.2084 | 20.8897 | 20.8059 | 21.179  | 21.0386 |
| CTAGE5       | 17.6012 | 16.5594 | 14.9597 | 15.3677 | 17.4599 | 17.1046 |
| CTB-50L17.10 | 19.7171 | 19.5358 | 19.4707 | 19.482  | 20.4038 | 19.9362 |
| CTBP1        | 22.335  | 21.5793 | 20.9892 | 21.3505 | 21.0366 | 21.8192 |
| CTBP2        | 19.787  | 20.2975 | 20.7503 | 20.7536 | 20.2181 | 20.8733 |
| CTDSPL2      | 15.1278 | 12.6091 | 16.4905 | 16.8422 | 13.7933 | 16.8005 |
| CTNNA1       | 22.1731 | 22.3838 | 23.3133 | 23.1038 | 22.8567 | 23.7457 |
| CTNNB1       | 22.204  | 22.4908 | 22.5824 | 22.6832 | 22.5403 | 22.8021 |
| CTNNBL1      | 19.7855 | 20.6639 | 20.6883 | 20.6253 | 20.4028 | 20.1899 |
| CTNND1       | 22.9978 | 23.2243 | 23.5727 | 23.5161 | 23.6456 | 22.8708 |
| CTPS1        | 22.675  | 21.7281 | 22.4487 | 22.1684 | 22.3446 | 23.6287 |

|         |         |         |         |         |         |         |
|---------|---------|---------|---------|---------|---------|---------|
| CTR9    | 19.8177 | 20.5152 | 20.7115 | 20.6592 | 20.3473 | 19.9197 |
| CTSA    | 22.4744 | 23.3417 | 23.1937 | 23.4057 | 23.1878 | 22.2439 |
| CTSB    | 24.5108 | 25.7758 | 24.8835 | 25.0114 | 25.5963 | 24.4196 |
| CTSC    | 24.3838 | 20.4278 | 20.9153 | 21.086  | 20.4878 | 22.2938 |
| CTSD    | 27.6068 | 26.0703 | 26.8929 | 27.2726 | 25.844  | 26.6495 |
| CTSK    | 16.4818 | 21.8711 | 16.6578 | 17.5046 | 20.9404 | 17.0939 |
| CTSS    | 19.8774 | 22.9401 | 22.8889 | 22.6653 | 23.5426 | 19.5743 |
| CTSZ    | 7.70227 | 19.0388 | 18.9361 | 19.5705 | 17.5969 | 8.27929 |
| CTTN    | 22.7013 | 22.4559 | 22.6126 | 22.1787 | 23.0904 | 23.0758 |
| CUL1    | 18.7588 | 19.4572 | 19.7446 | 19.5693 | 19.9783 | 20.597  |
| CUL2    | 19.3792 | 19.7585 | 19.3052 | 19.0261 | 20.0927 | 19.4403 |
| CUL3    | 19.7016 | 19.6781 | 19.6651 | 19.288  | 19.8181 | 19.3255 |
| CUL4A   | 17.8593 | 17.8435 | 18.8718 | 18.463  | 17.5044 | 18.1368 |
| CUL4B   | 20.9793 | 20.6973 | 21.6573 | 21.2778 | 21.0101 | 22.1998 |
| CUL5    | 17.8317 | 16.7164 | 16.774  | 15.9844 | 16.8384 | 16.5453 |
| CUTA    | 20.6282 | 20.4099 | 20.269  | 20.4496 | 20.1676 | 20.9426 |
| CWC22   | 17.0085 | 18.2447 | 18.8796 | 18.9735 | 18.0776 | 17.5935 |
| CWC27   | 17.9026 | 18.2176 | 19.1263 | 18.9422 | 17.4859 | 18.4679 |
| CWF19L1 | 17.8487 | 18.5857 | 18.7617 | 18.3435 | 18.9477 | 19.0147 |
| CYB5B   | 22.5673 | 21.6286 | 22.7984 | 23.1589 | 21.068  | 22.5627 |
| CYB5R1  | 19.3255 | 20.6486 | 21.1676 | 21.1286 | 21.2346 | 20.4302 |
| CYB5R2  | 18.9609 | 20.426  | 19.8645 | 19.116  | 20.7211 | 18.8988 |
| CYB5R3  | 24.2472 | 24.3385 | 23.9735 | 23.88   | 24.5469 | 22.8277 |
| CYC1    | 22.6819 | 23.0719 | 23.4782 | 23.7692 | 22.9816 | 23.2768 |
| CYCS    | 23.6764 | 22.968  | 22.5766 | 23.3897 | 23.302  | 23.118  |
| CYFIP1  | 21.6234 | 21.925  | 21.6307 | 21.3757 | 22.5429 | 22.4112 |
| CYP2S1  | 18.3767 | 17.4583 | 19.4655 | 19.8326 | 17.0099 | 19.268  |
| CYP4F11 | 16.8027 | 17.0929 | 21.0936 | 21.2885 | 17.3403 | 17.5014 |
| CYP51A1 | 19.4303 | 20.8422 | 19.9795 | 20.0918 | 21.2792 | 19.6579 |
| CYR61   | 18.393  | 20.2559 | 18.9649 | 18.7588 | 20.43   | 20.0541 |
| DAB2    | 20.3629 | 21.1767 | 20.3054 | 20.1637 | 21.4397 | 19.4759 |
| DAD1    | 21.3136 | 22.4989 | 22.0383 | 22.0778 | 23.1319 | 21.5861 |
| DAG1    | 18.6468 | 18.4294 | 19.7839 | 19.5758 | 18.6488 | 19.8348 |
| DAGLB   | 16.1662 | 17.6983 | 16.9581 | 16.755  | 17.3591 | 14.0947 |
| DAP3    | 22.4027 | 22.7709 | 23.2815 | 23.2564 | 23.0534 | 23.3736 |
| DARS    | 25.5379 | 24.282  | 24.0428 | 24.0225 | 24.6544 | 25.4335 |
| DARS2   | 22.0443 | 22.3094 | 22.426  | 22.5793 | 22.4612 | 22.3069 |
| DAXX    | 18.5638 | 18.7537 | 18.7376 | 19.3736 | 18.5257 | 19.2409 |
| DAZAP1  | 22.3322 | 22.6934 | 22.3409 | 22.3796 | 22.7923 | 22.825  |
| DBN1    | 22.8062 | 23.7368 | 23.7631 | 24.0183 | 23.9579 | 22.2991 |
| DBNL    | 20.7602 | 19.4923 | 19.9997 | 20.0138 | 19.8826 | 20.4348 |
| DBT     | 19.4736 | 19.7042 | 20.0832 | 20.3587 | 18.7704 | 19.4919 |
| DCAF7   | 17.5696 | 16.2494 | 17.1138 | 17.183  | 16.0279 | 17.6652 |
| DCBLD2  | 18.1581 | 20.8047 | 20.5868 | 20.1399 | 20.929  | 21.654  |
| DCK     | 19.8536 | 19.065  | 18.3869 | 18.267  | 19.7065 | 19.6792 |
| DCLK1   | 19.3357 | 14.57   | 14.4489 | 13.1719 | 15.9683 | 17.655  |
| DCPS    | 20.8792 | 20.9214 | 19.7641 | 19.6561 | 20.7707 | 20.9481 |
| DCTN1   | 22.6715 | 21.5317 | 21.9122 | 21.5285 | 21.8112 | 21.8339 |
| DCTN2   | 22.5505 | 21.2328 | 21.7477 | 21.4385 | 21.5409 | 21.8098 |
| DCTN4   | 19.4364 | 19.0966 | 18.4519 | 18.4097 | 19.3773 | 19.4705 |
| DCUN1D1 | 19.6051 | 19.5186 | 19.1059 | 18.74   | 20.0194 | 20.2646 |
| DCXR    | 19.9583 | 19.2111 | 20.1532 | 20.3527 | 18.9424 | 21.7879 |

|        |         |         |         |         |         |         |
|--------|---------|---------|---------|---------|---------|---------|
| DDAH1  | 19.7671 | 20.1758 | 18.6532 | 18.1883 | 19.9689 | 21.4719 |
| DDAH2  | 19.6071 | 18.436  | 15.4166 | 15.8174 | 18.4245 | 18.0389 |
| DDB1   | 25.2352 | 25.2108 | 24.8966 | 24.6343 | 25.4431 | 24.8657 |
| DDB2   | 18.7921 | 18.566  | 17.731  | 17.791  | 18.6935 | 18.0032 |
| DDOST  | 25.5409 | 26.3794 | 25.954  | 26.046  | 26.2407 | 25.1376 |
| DDRGK1 | 19.402  | 19.2678 | 19.4339 | 20.0295 | 19.1439 | 19.5096 |
| DDT    | 20.1495 | 19.3369 | 19.2412 | 19.6702 | 19.6658 | 18.7272 |
| DDX1   | 25.0377 | 24.8249 | 24.2068 | 23.9986 | 25.0571 | 24.6951 |
| DDX17  | 25.0566 | 25.1781 | 24.658  | 24.9868 | 25.0982 | 24.4769 |
| DDX18  | 18.9677 | 20.4565 | 20.9744 | 20.5909 | 20.898  | 21.8046 |
| DDX19A | 22.3098 | 21.1912 | 21.3776 | 21.2622 | 21.5606 | 23.4239 |
| DDX20  | 18.4672 | 18.4792 | 19.3915 | 19.5049 | 18.4645 | 19.2451 |
| DDX21  | 21.1317 | 23.1373 | 22.741  | 22.385  | 23.1953 | 24.938  |
| DDX23  | 21.2685 | 21.796  | 21.9146 | 21.8964 | 21.6467 | 21.3712 |
| DDX27  | 19.4308 | 21.4579 | 21.6358 | 21.6802 | 21.1878 | 22.1439 |
| DDX39A | 22.2351 | 21.6593 | 21.251  | 21.3796 | 21.1489 | 21.4291 |
| DDX39B | 22.6536 | 23.3389 | 23.2544 | 23.773  | 22.9143 | 23.1314 |
| DDX3X  | 23.8955 | 23.4288 | 23.1262 | 22.9181 | 23.5428 | 23.958  |
| DDX41  | 19.811  | 19.4642 | 19.8327 | 19.6761 | 19.6255 | 20.1058 |
| DDX42  | 23.1081 | 23.8376 | 23.5665 | 23.7184 | 23.6943 | 23.3252 |
| DDX46  | 22.9222 | 23.0787 | 23.2295 | 23.438  | 22.8745 | 23.0162 |
| DDX47  | 16.8911 | 18.8873 | 19.4245 | 19.315  | 18.6647 | 19.8183 |
| DDX5   | 25.1577 | 25.2125 | 25.5442 | 25.5044 | 25.2396 | 25.9354 |
| DDX50  | 18.0521 | 17.6097 | 18.5177 | 18.3918 | 17.3146 | 19.0413 |
| DDX56  | 17.0075 | 19.3539 | 19.3513 | 19.4054 | 18.6822 | 19.9934 |
| DDX6   | 23.3964 | 22.8747 | 23.5295 | 23.4997 | 23.0201 | 23.1659 |
| DECR1  | 23.3021 | 23.1021 | 22.9999 | 23.3028 | 23.2253 | 22.3155 |
| DEGS1  | 19.5451 | 20.0073 | 20.0843 | 20.5201 | 19.3229 | 19.6093 |
| DEK    | 21.1461 | 20.6063 | 21.7277 | 21.5349 | 20.9791 | 22.5676 |
| DERA   | 20.1388 | 18.8293 | 18.3008 | 18.1582 | 19.3469 | 18.9042 |
| DERL1  | 19.8725 | 20.6936 | 21.0945 | 20.9731 | 21.1761 | 19.9416 |
| DERL2  | 19.0406 | 19.9805 | 20.3138 | 20.4408 | 20.157  | 18.3253 |
| DFFA   | 16.6495 | 15.6985 | 16.1888 | 16.0666 | 15.7494 | 18.1472 |
| DFNA5  | 18.5038 | 20.4876 | 18.038  | 17.8274 | 21.3269 | 18.3442 |
| DHCR24 | 21.3732 | 21.7212 | 23.0973 | 23.3017 | 21.8256 | 23.6437 |
| DHCR7  | 20.7531 | 21.0772 | 21.8751 | 22.0529 | 21.5006 | 22.1197 |
| DHODH  | 19.591  | 18.3961 | 20.6214 | 20.6046 | 18.63   | 21.2861 |
| DHPS   | 16.5716 | 18.497  | 17.1033 | 16.6114 | 18.4937 | 18.6252 |
| DHRS7  | 18.164  | 19.0442 | 19.1043 | 18.9507 | 17.6945 | 16.9621 |
| DHX15  | 25.3988 | 25.301  | 25.0361 | 25.0072 | 25.1623 | 25.4576 |
| DHX16  | 19.6474 | 19.435  | 20.4346 | 20.3016 | 19.0272 | 19.5085 |
| DHX29  | 16.35   | 18.0114 | 17.7046 | 17.5838 | 17.6962 | 15.9131 |
| DHX30  | 19.1925 | 20.3971 | 20.7748 | 20.7756 | 20.9965 | 21.9554 |
| DHX36  | 16.5003 | 16.5084 | 17.7845 | 17.2822 | 16.5053 | 18.2451 |
| DHX37  | 17.493  | 18.2988 | 17.9527 | 17.8535 | 18.203  | 18.1465 |
| DHX38  | 21.3691 | 21.0437 | 21.4358 | 21.1713 | 21.308  | 21.1381 |
| DHX8   | 14.8866 | 16.2857 | 16.4312 | 16.1595 | 16.3143 | 15.665  |
| DHX9   | 25.5311 | 26.2095 | 26.3286 | 26.4008 | 26.233  | 26.0893 |
| DIABLO | 18.3776 | 18.2003 | 18.5424 | 18.7211 | 18.5257 | 18.1687 |
| DIAPH1 | 21.426  | 20.6216 | 21.3678 | 20.8871 | 21.151  | 20.8544 |
| DIDO1  | 17.9491 | 18.463  | 17.8363 | 18.4873 | 17.9826 | 17.3543 |
| DIEXF  | 13.1717 | 16.715  | 17.174  | 16.7131 | 16.6385 | 17.8376 |

|         |         |         |         |         |         |         |
|---------|---------|---------|---------|---------|---------|---------|
| DIP2B   | 15.7555 | 16.2451 | 15.6779 | 15.7447 | 17.3553 | 16.3332 |
| DIS3    | 19.8961 | 20.3426 | 20.2708 | 20.0396 | 20.5059 | 19.5223 |
| DKC1    | 17.1778 | 18.4782 | 17.935  | 18.0845 | 18.6817 | 19.8524 |
| DLAT    | 22.5012 | 22.217  | 22.5838 | 22.7825 | 22.2594 | 22.5443 |
| DLD     | 24.1755 | 23.925  | 23.9428 | 24.4042 | 23.895  | 23.9404 |
| DLG1    | 20.5811 | 19.8778 | 20.61   | 20.5159 | 19.5911 | 20.309  |
| DLST    | 23.9573 | 24.0097 | 23.0632 | 23.0955 | 24.6163 | 23.6605 |
| DNAAF5  | 17.7516 | 18.3387 | 19.3707 | 19.1625 | 18.0429 | 19.9216 |
| DNAJA1  | 22.2213 | 21.468  | 21.9346 | 21.8113 | 21.1949 | 23.3953 |
| DNAJA2  | 22.9024 | 21.962  | 22.6043 | 22.535  | 22.1326 | 23.4285 |
| DNAJA3  | 21.7722 | 21.5001 | 22.1558 | 22.2784 | 21.5597 | 21.5005 |
| DNAJB1  | 21.5449 | 21.3247 | 21.6046 | 21.531  | 21.504  | 23.8241 |
| DNAJB11 | 21.9588 | 22.5236 | 22.443  | 22.8625 | 22.4289 | 22.502  |
| DNAJB4  | 18.4399 | 19.9115 | 19.6768 | 18.9702 | 20.5838 | 20.261  |
| DNAJB6  | 18.413  | 19.7757 | 19.3207 | 19.4502 | 19.2514 | 19.1758 |
| DNAJC10 | 20.8327 | 22.3871 | 21.4455 | 20.8685 | 22.7422 | 21.3862 |
| DNAJC11 | 20.0564 | 20.2374 | 21.0749 | 20.9943 | 20.6034 | 20.9529 |
| DNAJC13 | 20.3369 | 21.2841 | 20.801  | 20.6867 | 21.784  | 19.7131 |
| DNAJC19 | 16.8873 | 17.998  | 18.7913 | 18.8986 | 17.9189 | 18.7955 |
| DNAJC3  | 22.0368 | 22.1979 | 21.8862 | 21.9866 | 22.1347 | 20.6447 |
| DNAJC5  | 17.11   | 19.0024 | 18.9585 | 19.0041 | 18.8654 | 19.0057 |
| DNAJC7  | 20.5474 | 20.685  | 20.6596 | 20.7073 | 20.4088 | 21.8207 |
| DNAJC8  | 21.6696 | 21.9119 | 21.0053 | 21.3239 | 22.1452 | 21.6908 |
| DNAJC9  | 18.6625 | 18.4277 | 18.4324 | 18.255  | 18.6738 | 19.8747 |
| DNM1L   | 24.3504 | 22.9945 | 23.4711 | 22.9677 | 23.7596 | 24.9297 |
| DNM2    | 22.8986 | 22.3487 | 21.8556 | 21.4472 | 22.3399 | 22.556  |
| DNMT1   | 17.4077 | 18.5166 | 18.0111 | 17.6787 | 18.4907 | 18.5429 |
| DNPEP   | 21.9539 | 20.4008 | 20.782  | 20.4166 | 20.729  | 20.5751 |
| DNTTIP2 | 17.154  | 18.501  | 19.3372 | 19.3552 | 18.3279 | 19.1945 |
| DOCK1   | 18.9124 | 18.0343 | 17.6418 | 17.4721 | 18.0744 | 17.6677 |
| DOCK10  | 18.8892 | 21.5759 | 20.9837 | 21.1215 | 21.6469 | 20.142  |
| DOCK7   | 20.806  | 20.7407 | 20.2533 | 20.0724 | 21.1091 | 20.0665 |
| DPF2    | 18.6442 | 18.6538 | 18.7394 | 18.9679 | 18.8814 | 18.5778 |
| DPH5    | 21.092  | 19.6255 | 20.2854 | 19.7945 | 20.2494 | 21.3812 |
| DPM1    | 20.092  | 21.4972 | 21.6054 | 21.6266 | 21.0472 | 21.0003 |
| DPP3    | 21.9434 | 19.9856 | 20.7797 | 20.5341 | 20.3173 | 21.8858 |
| DPP4    | 12.5755 | 19.3367 | 12.6112 | 12.7151 | 18.9392 | 11.5432 |
| DPP7    | 18.3582 | 18.476  | 18.2894 | 18.594  | 17.9993 | 18.3558 |
| DPYSL2  | 26.5882 | 25.1386 | 24.5361 | 24.3816 | 25.0747 | 24.2295 |
| DPYSL3  | 24.9254 | 23.0261 | 23.9584 | 23.6917 | 22.8901 | 23.0059 |
| DRG1    | 20.1314 | 20.5453 | 20.3725 | 20.3944 | 21.023  | 21.6366 |
| DRG2    | 19.7093 | 18.2409 | 18.6608 | 18.219  | 18.7304 | 20.0905 |
| DSG2    | 15.8547 | 18.8253 | 16.4645 | 15.6936 | 18.5193 | 16.4939 |
| DST     | 23.914  | 24.2497 | 23.8486 | 23.6774 | 24.3154 | 22.9994 |
| DSTN    | 24.6003 | 23.3974 | 23.6911 | 23.8764 | 23.7235 | 24.4571 |
| DTD1    | 17.6038 | 18.8383 | 19.8598 | 19.1385 | 19.2907 | 19.5206 |
| DTX3    | 20.1514 | 24.3462 | 19.0417 | 18.7816 | 24.5461 | 19.5735 |
| DTX3L   | 18.6194 | 16.8903 | 16.8681 | 16.6311 | 15.1652 | 17.5078 |
| DTYMK   | 23.1269 | 22.5757 | 22.4152 | 22.425  | 22.7485 | 22.9358 |
| DUSP3   | 19.103  | 18.3413 | 17.4478 | 17.3752 | 19.1319 | 19.0441 |
| DUT     | 22.1376 | 21.1452 | 21.9251 | 21.7832 | 21.3396 | 22.2022 |
| DYNC1H1 | 25.2721 | 25.2843 | 25.1423 | 24.9938 | 26.0526 | 25.2791 |

|          |         |         |         |         |         |         |
|----------|---------|---------|---------|---------|---------|---------|
| DYNC1I2  | 22.6384 | 21.8795 | 21.536  | 21.4597 | 22.1987 | 21.9069 |
| DYNC1LI1 | 22.994  | 21.8115 | 22.005  | 21.2966 | 22.4817 | 22.8419 |
| DYNC1LI2 | 22.9048 | 21.9415 | 21.7545 | 21.6413 | 22.529  | 22.4572 |
| DYNC2H1  | 27.8271 | 28.5744 | 27.3476 | 27.2227 | 28.8338 | 28.0603 |
| DYNLL1   | 20.57   | 19.2717 | 19.1755 | 19.476  | 19.6155 | 19.4896 |
| DYNLT1   | 17.2734 | 17.2609 | 16.8206 | 16.0521 | 18.2891 | 15.0747 |
| DYNLT3   | 19.7724 | 17.3492 | 16.6847 | 16.9168 | 17.8184 | 18.3247 |
| DYSF     | 12.9902 | 13.6251 | 13.464  | 13.4284 | 13.1635 | 14.0186 |
| EARS2    | 17.2196 | 18.8202 | 19.3503 | 19.7414 | 18.8487 | 19.1309 |
| EBNA1BP2 | 19.3706 | 20.687  | 21.9324 | 21.8641 | 20.8699 | 21.977  |
| EBP      | 19.6701 | 19.0973 | 19.4549 | 19.4927 | 19.6115 | 19.4606 |
| ECD      | 15.7887 | 14.8363 | 17.6145 | 16.9056 | 15.2922 | 17.7789 |
| ECE1     | 20.2507 | 21.3637 | 20.5112 | 20.6088 | 20.8091 | 19.9834 |
| ECH1     | 23.4454 | 22.9078 | 22.7934 | 23.3425 | 22.3775 | 22.5429 |
| ECHDC1   | 20.775  | 21.0645 | 20.5249 | 20.4589 | 21.222  | 21.8322 |
| ECHS1    | 23.3852 | 23.0987 | 23.5845 | 23.9556 | 23.2639 | 23.8405 |
| ECI1     | 20.1075 | 19.235  | 20.4265 | 20.8766 | 19.0369 | 18.6653 |
| ECI2     | 21.4627 | 21.633  | 21.0244 | 21.1723 | 21.7339 | 20.8885 |
| ECSIT    | 18.3849 | 18.8066 | 18.4454 | 18.7501 | 18.9026 | 18.2936 |
| EDC3     | 19.6992 | 18.5573 | 19.7776 | 19.455  | 19.0035 | 20.1325 |
| EDC4     | 21.9419 | 20.6246 | 22.1253 | 22.0852 | 20.8557 | 22.3255 |
| EDEM3    | 17.7022 | 18.3961 | 17.952  | 17.6354 | 19.0923 | 18.1527 |
| EDIL3    | 21.098  | 19.3388 | 20.4883 | 20.7051 | 19.6108 | 20.2805 |
| EEA1     | 22.9505 | 22.5741 | 22.1907 | 22.1446 | 22.9508 | 21.2053 |
| EED      | 17.3375 | 18.0927 | 18.8697 | 19.2104 | 17.536  | 17.8952 |
| EEF1A1   | 28.3845 | 27.0073 | 27.0964 | 27.0988 | 26.9244 | 28.57   |
| EEF1A2   | 18.3615 | 16.2611 | 17.6386 | 18.0166 | 17.1844 | 19.5198 |
| EEF1B2   | 23.1425 | 22.873  | 23.1038 | 22.8075 | 23.3398 | 23.7323 |
| EEF1D    | 25.0982 | 23.8844 | 24.7883 | 24.8063 | 24.3475 | 25.6044 |
| EEF1E1   | 19.9364 | 18.9128 | 19.7458 | 19.7033 | 17.799  | 19.39   |
| EEF1G    | 26.8917 | 25.9838 | 26.6534 | 26.5569 | 26.4441 | 26.8877 |
| EEF2     | 28.1771 | 27.7849 | 27.5682 | 27.2918 | 28.3272 | 29.5403 |
| EFHD2    | 22.2387 | 21.918  | 22.1871 | 22.0993 | 22.2264 | 23.1069 |
| EFR3A    | 17.6678 | 18.4211 | 17.721  | 17.6374 | 17.9422 | 14.8218 |
| EFTUD1   | 17.4289 | 18.4342 | 19.0103 | 18.3775 | 17.929  | 18.2339 |
| EFTUD2   | 24.4791 | 25.0419 | 25.2037 | 25.2279 | 24.9136 | 25.0529 |
| EGFR     | 22.1166 | 23.3465 | 23.7138 | 23.6966 | 23.6291 | 21.6346 |
| EHD1     | 22.6166 | 23.0794 | 22.8439 | 22.7395 | 23.645  | 23.1837 |
| EHD2     | 21.9838 | 22.5215 | 21.8793 | 22.3621 | 21.8665 | 21.6296 |
| EHD4     | 20.4745 | 20.9733 | 20.9902 | 20.4208 | 21.7664 | 22.3876 |
| EIF1     | 19.7861 | 18.8686 | 20.0903 | 19.8774 | 18.9258 | 20.3612 |
| EIF1AY   | 20.2852 | 20.746  | 20.4902 | 20.6021 | 20.533  | 20.4372 |
| EIF2A    | 21.9531 | 21.8637 | 22.5371 | 22.2622 | 22.3451 | 23.1519 |
| EIF2AK2  | 21.7311 | 21.1079 | 21.7344 | 21.3761 | 20.9714 | 21.8987 |
| EIF2B1   | 20.5692 | 20.5709 | 20.3688 | 19.9528 | 21.1421 | 21.766  |
| EIF2B2   | 18.0629 | 18.0907 | 17.1491 | 16.791  | 18.2882 | 17.8628 |
| EIF2B3   | 21.2055 | 19.8594 | 20.2362 | 20.0358 | 20.3126 | 20.9544 |
| EIF2B4   | 19.0668 | 18.929  | 19.3549 | 18.9196 | 19.6455 | 20.7431 |
| EIF2B5   | 20.2797 | 19.2934 | 19.6034 | 19.3833 | 19.6999 | 20.2735 |
| EIF2S1   | 23.9602 | 23.3805 | 23.4568 | 23.4756 | 23.7726 | 24.0759 |
| EIF2S2   | 23.1534 | 22.5173 | 22.7323 | 22.5294 | 23.0103 | 23.4264 |
| EIF2S3   | 24.2193 | 23.6687 | 24.0858 | 23.9466 | 24.1805 | 24.8213 |



|         |         |         |         |         |         |         |
|---------|---------|---------|---------|---------|---------|---------|
| EIF3A   | 24.9355 | 24.6061 | 24.9199 | 24.7718 | 24.9861 | 25.0189 |
| EIF3B   | 24.9675 | 24.4519 | 24.9298 | 24.563  | 24.8466 | 25.2475 |
| EIF3C   | 23.7497 | 23.5881 | 24.0014 | 23.8588 | 23.9527 | 24.3007 |
| EIF3D   | 23.3399 | 22.8255 | 23.2408 | 23.1111 | 22.9975 | 23.8174 |
| EIF3E   | 23.2359 | 23.2043 | 23.5766 | 23.3788 | 23.4792 | 24.0674 |
| EIF3F   | 23.4721 | 23.0755 | 23.5203 | 23.292  | 23.3032 | 23.8626 |
| EIF3G   | 23.4382 | 22.7523 | 23.0449 | 22.8965 | 23.0589 | 23.7773 |
| EIF3H   | 22.4863 | 21.8562 | 22.2248 | 22.2104 | 22.1937 | 22.9136 |
| EIF3I   | 23.7753 | 23.5471 | 23.7573 | 23.7355 | 23.5239 | 24.3604 |
| EIF3J   | 21.592  | 21.1732 | 21.2983 | 21.2509 | 21.3421 | 22.0176 |
| EIF3K   | 22.9574 | 22.7239 | 23.0365 | 23.0466 | 23.1255 | 23.5622 |
| EIF3L   | 23.5907 | 23.495  | 23.8562 | 23.7211 | 23.8871 | 24.2986 |
| EIF3M   | 22.7711 | 22.9137 | 23.2491 | 23.0865 | 23.2252 | 23.5502 |
| EIF4A1  | 25.6861 | 25.118  | 25.3251 | 25.2385 | 25.7699 | 26.5495 |
| EIF4A2  | 21.0301 | 21.3762 | 20.0213 | 20.3786 | 20.8249 | 21.8809 |
| EIF4A3  | 24.2929 | 24.6358 | 24.0591 | 24.2184 | 24.0818 | 23.7924 |
| EIF4B   | 20.6117 | 20.1681 | 20.3201 | 20.4568 | 20.1133 | 20.1585 |
| EIF4E   | 22.0435 | 21.4711 | 21.6933 | 21.6829 | 21.7207 | 22.1516 |
| EIF4E2  | 18.8998 | 18.4945 | 18.4448 | 18.73   | 17.8578 | 18.3967 |
| EIF4G1  | 23.7656 | 23.516  | 24.1218 | 24.0596 | 24.0122 | 24.5696 |
| EIF4G2  | 23.2405 | 22.803  | 23.3833 | 23.2027 | 22.9239 | 23.3858 |
| EIF4G3  | 18.2152 | 16.6471 | 17.5257 | 16.9716 | 16.9376 | 17.1064 |
| EIF4H   | 22.9963 | 21.0647 | 22.4791 | 22.2362 | 21.3434 | 23.164  |
| EIF5    | 23.6157 | 22.7869 | 23.9944 | 23.2791 | 23.3715 | 24.478  |
| EIF5A   | 24.1809 | 24.5639 | 24.2751 | 24.3752 | 24.6298 | 25.229  |
| EIF5B   | 23.6779 | 23.5557 | 22.7148 | 22.8886 | 23.7361 | 22.8632 |
| EIF6    | 23.3282 | 23.5705 | 23.9118 | 23.9653 | 23.7531 | 24.3417 |
| ELAC2   | 19.9095 | 20.125  | 21.1579 | 21.1291 | 19.6151 | 21.4273 |
| ELAVL1  | 24.2909 | 24.7065 | 24.6526 | 24.8267 | 24.4505 | 24.7855 |
| ELMO2   | 19.8323 | 20.3126 | 19.8289 | 19.7198 | 20.5227 | 19.8894 |
| ELP2    | 18.7088 | 18.0639 | 17.9108 | 17.524  | 18.9116 | 18.7851 |
| EMC1    | 22.2924 | 22.4973 | 23.5859 | 23.2917 | 22.6327 | 22.9382 |
| EMC10   | 17.251  | 17.0636 | 16.3463 | 17.7407 | 15.8825 | 17.3597 |
| EMC2    | 20.7891 | 20.5417 | 20.7319 | 20.8407 | 20.4676 | 21.2122 |
| EMC3    | 18.1252 | 18.0275 | 19.1742 | 18.8741 | 18.4248 | 18.6533 |
| EMC7    | 21.2855 | 21.317  | 22.0525 | 21.8061 | 21.1246 | 21.3816 |
| EMD     | 21.7932 | 21.8762 | 22.0585 | 22.3479 | 21.8649 | 21.7977 |
| EMG1    | 19.781  | 21.8469 | 21.882  | 21.8411 | 21.4711 | 21.7008 |
| EMILIN1 | 16.7392 | 19.338  | 9.23836 | NA      | 18.3862 | 9.12702 |
| EML1    | 20.8844 | 18.4561 | 17.4595 | 17.379  | 19.1983 | 16.9817 |
| EML2    | 19.826  | 18.0496 | 15.3597 | 15.7895 | 18.9565 | 14.7223 |
| EML4    | 19.6997 | 19.4728 | 19.3833 | 18.7871 | 20.2017 | 20.4865 |
| EMP3    | 18.113  | 16.4876 | 17.9176 | 17.5811 | 15.2394 | 14.3119 |
| ENAH    | 22.4174 | 19.1621 | 20.0936 | 19.9776 | 20.0619 | 22.2739 |
| ENDOD1  | 17.3584 | 19.911  | 16.5032 | 16.0264 | 20.2262 | 17.7461 |
| ENDOG   | 14.4726 | 15.0479 | 7.65401 | 14.2898 | 12.2486 | 10.9373 |
| ENG     | 22.4181 | 23.8112 | 23.0633 | 23.1789 | 23.2969 | 21.1395 |
| ENO1    | 29.4688 | 28.0481 | 27.5813 | 27.6185 | 28.3134 | 29.6184 |
| ENO2    | 22.505  | 18.1997 | 19.1194 | 18.7964 | 18.567  | 20.9223 |
| ENOPH1  | 18.1767 | 16.9009 | 15.1327 | 16.0476 | 15.95   | 17.5932 |
| ENPP1   | 17.3986 | 19.2625 | 16.4718 | 16.614  | 18.508  | 17.6473 |
| EPB41   | 15.069  | 15.3776 | 18.7879 | 18.4823 | 15.0728 | 17.0345 |

|         |         |         |         |         |         |         |
|---------|---------|---------|---------|---------|---------|---------|
| EPB41L2 | 22.8654 | 22.3373 | 21.6332 | 21.7401 | 22.1906 | 22.9042 |
| EPB41L3 | 16.7032 | 21.4301 | 18.3818 | 17.7171 | 21.8574 | 17.7647 |
| EPDR1   | 22.5852 | 20.7471 | 22.5525 | 22.7721 | 21.0612 | 21.6787 |
| EPHA2   | 22.0448 | 22.1584 | 22.3156 | 21.9242 | 22.4243 | 23.0107 |
| EPHB2   | 18.4973 | 16.1    | 18.3633 | 17.9834 | 15.7362 | 15.9845 |
| EPHX1   | 27.7759 | 24.082  | 27.4791 | 27.5277 | 24.0803 | 25.67   |
| EPN1    | 15.3725 | 16.6897 | 15.933  | 16.5805 | 16.6303 | 17.9112 |
| EPN2    | 15.7395 | 16.976  | 15.0517 | 15.3319 | 16.851  | 15.5866 |
| EPRS    | 25.6295 | 24.7292 | 24.7783 | 24.6216 | 25.4172 | 25.2521 |
| EPS15   | 20.1205 | 19.2269 | 20.2886 | 19.7035 | 19.9559 | 19.6836 |
| EPS15L1 | 19.692  | 18.821  | 19.7571 | 19.3487 | 19.2843 | 19.8575 |
| EPS8    | 20.3228 | 17.2672 | 18.7535 | 18.4782 | 18.5661 | 19.4424 |
| ERAL1   | 19.3162 | 20.198  | 20.7838 | 21.0192 | 20.6614 | 21.5157 |
| ERAP1   | 23.549  | 22.3033 | 22.9913 | 23.0574 | 22.1478 | 21.6174 |
| ERAP2   | 20.4934 | 24.4822 | 23.9607 | 23.6813 | 24.4161 | 20.8962 |
| ERBB2IP | 20.6922 | 20.2545 | 20.499  | 20.3497 | 20.0027 | 19.4663 |
| ERGIC1  | 20.8396 | 21.7896 | 22.1079 | 21.9958 | 21.9276 | 21.0395 |
| ERGIC2  | 18.8521 | 19.5486 | 19.4521 | 19.4462 | 19.355  | 18.4709 |
| ERGIC3  | 19.0918 | 19.8178 | 20.1709 | 20.0045 | 19.6127 | 18.8531 |
| ERLEC1  | 19.8637 | 18.0285 | 18.5686 | 18.2638 | 19.0131 | 19.4184 |
| ERLIN1  | 19.8209 | 20.3475 | 20.3588 | 20.6086 | 20.31   | 20.0953 |
| ERLIN2  | 21.5188 | 21.5429 | 21.3103 | 21.4014 | 21.0409 | 21.4981 |
| ERMP1   | 16.9978 | 17.0894 | 17.9208 | 18.4237 | 16.0288 | 17.0168 |
| ERO1A   | 24.1117 | 24.0032 | 23.3949 | 22.9305 | 23.9649 | 22.8519 |
| ERP29   | 24.3116 | 24.4617 | 24.0825 | 24.3974 | 24.2388 | 24.2399 |
| ERP44   | 24.2201 | 23.7191 | 23.7595 | 23.9055 | 23.9389 | 23.5042 |
| ESD     | 23.0916 | 22.0359 | 21.653  | 21.4155 | 22.436  | 23.0576 |
| ESF1    | 20.8293 | 20.1311 | 18.2193 | 18.2328 | 20.6486 | 19.9159 |
| ESYT1   | 23.2096 | 23.1949 | 23.5158 | 23.4307 | 23.1027 | 22.9639 |
| ESYT2   | 21.166  | 20.7882 | 21.7857 | 21.6522 | 20.6165 | 19.4837 |
| ETF1    | 23.8057 | 22.9421 | 23.2994 | 22.9754 | 23.2424 | 24.2014 |
| ETFA    | 23.4351 | 23.4662 | 24.3602 | 24.6987 | 23.0818 | 23.3659 |
| ETFB    | 23.598  | 23.5567 | 24.3765 | 24.6939 | 23.5886 | 23.6223 |
| ETFDH   | 18.5598 | 18.0231 | 17.4222 | 16.9182 | 17.1316 | 16.8029 |
| ETHE1   | 22.2614 | 21.3261 | 21.19   | 21.5047 | 21.8827 | 20.1495 |
| EWSR1   | 22.0311 | 21.58   | 21.7124 | 22.0581 | 21.9878 | 21.5843 |
| EXOC1   | 18.5327 | 18.247  | 18.0887 | 18.665  | 18.417  | 19.4411 |
| EXOC2   | 20.2584 | 20.4461 | 19.4837 | 19.6217 | 20.2359 | 19.987  |
| EXOC3   | 19.3531 | 18.1453 | 18.337  | 17.8219 | 18.4288 | 18.8332 |
| EXOC4   | 21.2697 | 20.3859 | 20.1638 | 20.0823 | 20.5323 | 20.7456 |
| EXOC5   | 19.3887 | 18.6251 | 17.8675 | 17.176  | 18.9717 | 18.5659 |
| EXOC6B  | 19.2142 | 19.1864 | 18.3275 | 18.1113 | 19.0943 | 18.3579 |
| EXOC7   | 20.9629 | 19.9909 | 18.7295 | 18.5688 | 19.9637 | 20.0643 |
| EXOC8   | 19.7236 | 19.1005 | 19.1647 | 18.7029 | 19.2513 | 19.3899 |
| EXOG    | 16.8006 | 17.9427 | 17.7993 | 17.1703 | 18.3815 | 18.0122 |
| EXOSC1  | 18.5885 | 20.2277 | 20.2486 | 20.5303 | 20.1506 | 19.9739 |
| EXOSC10 | 19.1271 | 21.0706 | 20.8223 | 20.7519 | 20.9293 | 20.8123 |
| EXOSC2  | 20.6058 | 21.1242 | 21.4375 | 21.3825 | 20.9716 | 21.2328 |
| EXOSC3  | 18.1338 | 19.0528 | 19.8092 | 20.0284 | 18.9027 | 19.9613 |
| EXOSC4  | 16.0884 | 18.3137 | 18.5449 | 18.6341 | 17.5899 | 17.7323 |
| EXOSC5  | 20.8237 | 21.3964 | 21.5363 | 21.7647 | 21.1128 | 21.4162 |
| EXOSC6  | 20.1473 | 21.0362 | 21.3462 | 21.492  | 20.929  | 21.1281 |

|          |         |         |         |         |         |         |
|----------|---------|---------|---------|---------|---------|---------|
| EXOSC7   | 20.5236 | 21.117  | 21.2784 | 21.495  | 20.5645 | 21.0204 |
| EXOSC8   | 19.1185 | 19.5983 | 20.2902 | 20.143  | 19.1725 | 20.6158 |
| EXOSC9   | 20.0691 | 20.8985 | 21.1178 | 21.2551 | 20.7333 | 21.1314 |
| EXT2     | 15.1591 | 16.1202 | 16.7705 | 16.778  | 15.437  | 15.7126 |
| EZH2     | 17.7767 | 18.6807 | 19.7135 | 19.6627 | 19.3872 | 20.047  |
| EZR      | 23.3286 | 21.3572 | 22.5743 | 21.898  | 21.8744 | 24.5227 |
| F11R     | 16.5526 | 17.6109 | 17.6698 | 17.3158 | 18.4228 | 18.1747 |
| F3       | 18.7198 | 19.1529 | 18.9637 | 18.7191 | 18.5436 | 17.9691 |
| FADS2    | 22.262  | 22.7446 | 23.4559 | 23.2725 | 23.1373 | 21.7624 |
| FAF1     | 20.7848 | 19.6264 | 17.4065 | 17.8141 | 19.8531 | 17.9335 |
| FAF2     | 20.8216 | 21.6326 | 22.3291 | 22.6747 | 21.5274 | 21.8287 |
| FAH      | 21.168  | 19.7678 | 20.3572 | 20.01   | 20.1103 | 20.4279 |
| FAHD1    | 20.3344 | 20.1747 | 19.8496 | 20.194  | 19.9523 | 18.682  |
| FAHD2A   | 20.8048 | 21.4642 | 20.0713 | 20.1119 | 21.4563 | 21.0249 |
| FAM114A1 | 21.7519 | 21.1895 | 19.4833 | 18.9599 | 21.5985 | 19.0039 |
| FAM114A2 | 17.6236 | 17.3102 | 16.3455 | 16.2966 | 18.213  | 17.8032 |
| FAM120A  | 21.7679 | 21.4229 | 21.5419 | 21.3537 | 21.8583 | 21.701  |
| FAM126A  | 17.7643 | 17.6061 | 16.698  | 16.6485 | 17.5658 | 15.701  |
| FAM129A  | 21.5899 | 20.7927 | 20.3511 | 19.7627 | 22.0027 | 22.1328 |
| FAM129B  | 23.3268 | 23.2    | 22.4979 | 22.5577 | 23.3653 | 23.3216 |
| FAM160B1 | 17.767  | 16.8627 | 15.3433 | 15.4155 | 16.8442 | 18.0707 |
| FAM208A  | 16.4019 | 16.7481 | 17.2201 | 16.8765 | 16.5206 | 15.3523 |
| FAM21C   | 17.9672 | 17      | 16.9602 | 16.622  | 17.079  | 15.5125 |
| FAM234A  | 17.0688 | 16.0304 | 17.7134 | 17.8489 | 15.665  | 16.3492 |
| FAM3C    | 18.9919 | 19.9203 | 20.4206 | 20.2698 | 20.1754 | 20.7811 |
| FAM49B   | 20.9592 | 21.0341 | 21.5181 | 21.2568 | 21.3893 | 21.8567 |
| FAM50A   | 20.8838 | 19.8289 | 19.7459 | 19.6182 | 19.5465 | 20.4878 |
| FAM91A1  | 20.1771 | 20.6002 | 19.9671 | 19.9941 | 20.6858 | 20.2862 |
| FAM98A   | 20.9521 | 21.0707 | 20.2565 | 19.9669 | 21.5343 | 21.5126 |
| FAM98B   | 19.9655 | 20.1355 | 19.6312 | 19.4901 | 20.1187 | 19.6171 |
| FANCI    | 15.9911 | 16.2176 | 18.1202 | 17.3062 | 17.3718 | 16.3481 |
| FAP      | 18.5099 | 22.4209 | 18.1202 | 17.7658 | 22.3369 | 18.143  |
| FAR1     | 16.1234 | 17.193  | 19.3546 | 19.021  | 18.1028 | 18.7615 |
| FARP1    | 20.3789 | 18.9802 | 18.3944 | 18.455  | 18.7445 | 14.1076 |
| FARSA    | 21.3656 | 20.5566 | 20.8536 | 20.8436 | 20.9391 | 22.0937 |
| FARSB    | 23.5181 | 23.1347 | 23.209  | 23.0692 | 23.5501 | 24.1233 |
| FASN     | 25.424  | 25.5451 | 26.0584 | 25.8937 | 25.7635 | 27.5934 |
| FASTKD2  | 17.7515 | 18.2748 | 19.0133 | 18.9223 | 19.0584 | 19.6545 |
| FASTKD5  | 18.6481 | 19.0907 | 20.0885 | 20.1005 | 19.0781 | 19.8632 |
| FBL      | 23.3071 | 24.0555 | 24.2657 | 24.2192 | 24.1039 | 24.167  |
| FBXO22   | 17.8054 | 16.7604 | 18.2572 | 17.6353 | 17.6121 | 18.6013 |
| FDFT1    | 20.6269 | 19.6499 | 20.6582 | 21.0005 | 19.849  | 20.4076 |
| FDPS     | 20.6923 | 20.5205 | 19.5988 | 20.0106 | 20.6345 | 20.4688 |
| FDXR     | 20.6571 | 18.8554 | 18.927  | 19.4165 | 19.0186 | 19.1245 |
| FECH     | 17.9583 | 17.8643 | 18.496  | 19.0711 | 17.6307 | 17.4094 |
| FEN1     | 23.3144 | 23.6888 | 23.393  | 23.1393 | 23.6263 | 23.7018 |
| FERMT2   | 23.2142 | 22.8355 | 21.1683 | 21.0183 | 22.9771 | 22.0313 |
| FGF2     | 18.4608 | 21.7182 | 18.4433 | 18.3035 | 22.1911 | 17.9884 |
| FH       | 23.9426 | 23.8728 | 24.1867 | 24.4176 | 24.1956 | 24.1986 |
| FHL1     | 24.042  | 21.8706 | 21.5082 | 21.3628 | 22.204  | 21.525  |
| FHL2     | 23.7114 | 22.2507 | 20.6946 | 20.448  | 23.1545 | 20.579  |
| FHOD1    | 19.1361 | 19.5394 | 19.078  | 18.534  | 20.0981 | 20.5227 |

|            |         |         |         |         |         |         |
|------------|---------|---------|---------|---------|---------|---------|
| FIP1L1     | 18.9216 | 17.0827 | 18.3623 | 18.5216 | 17.4958 | 18.9626 |
| FKBP10     | 23.247  | 24.0813 | 23.6691 | 23.5673 | 24.033  | 20.6408 |
| FKBP14     | 18.561  | 19.962  | 19.844  | 19.8412 | 20.0669 | 17.814  |
| FKBP15     | 18.7314 | 17.6806 | 18.4182 | 17.8754 | 18.1538 | 17.5166 |
| FKBP2      | 24.4006 | 23.1322 | 22.7654 | 22.8735 | 23.2044 | 21.9388 |
| FKBP3      | 20.2158 | 19.4727 | 18.6231 | 18.8977 | 19.9088 | 19.4935 |
| FKBP4      | 24.2368 | 23.4097 | 24.1754 | 23.8079 | 23.4271 | 24.3076 |
| FKBP7      | 18.6683 | 18.748  | 20.4853 | 20.3868 | 17.5213 | 16.7682 |
| FKBP8      | 20.1324 | 20.895  | 20.6407 | 21.1103 | 20.352  | 20.6358 |
| FKBP9      | 24.1217 | 23.8315 | 23.5258 | 23.7355 | 23.3975 | 21.8566 |
| FLAD1      | 16.6261 | 14.0015 | 16.2132 | 15.5663 | 14.3201 | 16.0319 |
| FLII       | 23.1089 | 22.7235 | 22.1212 | 21.6416 | 22.9516 | 22.3162 |
| FLNA       | 28.8083 | 28.0913 | 27.7845 | 27.7548 | 28.7218 | 28.0735 |
| FLNB       | 25.0212 | 24.9825 | 25.4428 | 25.4652 | 25.5414 | 26.5978 |
| FLNC       | 23.2649 | 25.5267 | 23.3542 | 23.3672 | 25.8733 | 21.6456 |
| FLOT1      | 25.7455 | 25.9529 | 25.2933 | 25.1189 | 26.4154 | 25.8994 |
| FLOT2      | 21.8242 | 21.7798 | 22.0723 | 22.4262 | 21.4355 | 22.5122 |
| FMNL3      | 13.6714 | 18.3541 | 16.4047 | 16.2701 | 19.0938 | 17.2062 |
| FMR1       | 20.3268 | 20.3936 | 20.3541 | 20.4176 | 20.1204 | 20.3866 |
| FN1        | 23.6979 | 27.6231 | 23.1645 | 23.7587 | 26.3215 | 22.7644 |
| FNDC3A     | 17.6474 | 18.2839 | 17.7567 | 17.1994 | 18.365  | 18.0901 |
| FNDC3B     | 24.9003 | 24.2677 | 23.9477 | 23.3195 | 24.4505 | 24.7906 |
| FNTA       | 21.1134 | 20.0712 | 19.5997 | 19.2751 | 20.5171 | 20.2931 |
| FOCAD      | 18.4075 | 18.3834 | 19.0642 | 18.2879 | 16.9495 | 15.8065 |
| FOXK1      | 18.7626 | 19.0422 | 19.4238 | 19.5533 | 18.4826 | 18.6624 |
| FOXRED1    | 14.4424 | 14.6573 | 17.9948 | 18.2974 | 13.7856 | 17.2147 |
| FRYL       | 16.9776 | 16.4436 | 16.5779 | 16.0041 | 17.4149 | 17.6508 |
| FSCN1      | 25.3529 | 25.3331 | 23.2122 | 23.2257 | 25.6348 | 23.9505 |
| FSTL1      | 19.5629 | 20.3573 | 18.1486 | 18.2759 | 20.1154 | 17.867  |
| FTH1       | 22.7323 | 22.4391 | 22.0059 | 22.0131 | 22.8459 | 21.6543 |
| FTL        | 23.7597 | 21.7815 | 22.7399 | 23.0328 | 21.8528 | 21.7829 |
| FTO        | 21.771  | 19.8883 | 20.1932 | 19.954  | 19.9039 | 21.7002 |
| FTSJ3      | 19.4594 | 20.4723 | 20.672  | 20.2248 | 20.6777 | 21.4891 |
| FUBP1      | 22.9512 | 23.0166 | 23.1499 | 23.3674 | 23.3142 | 22.7741 |
| FUBP3      | 22.2402 | 21.9414 | 22.1691 | 22.1612 | 22.3117 | 22.8065 |
| FUCA1      | 21.2675 | 21.0117 | 21.6403 | 21.234  | 21.3102 | 21.3857 |
| FUCA2      | 17.8605 | 15.6945 | 16.0975 | 17.4418 | 14.9088 | 16.5945 |
| FUS        | 22.8151 | 22.5126 | 22.7024 | 23.1458 | 22.185  | 22.4105 |
| FUT8       | 15.6978 | 19.0088 | 15.3461 | 15.2647 | 18.9299 | 14.8891 |
| FXR1       | 22.7736 | 22.7096 | 23.256  | 23.3151 | 22.6999 | 23.2865 |
| FXR2       | 20.2198 | 19.8225 | 19.476  | 19.7363 | 19.5664 | 20.0505 |
| G3BP1      | 24.4293 | 23.6608 | 25.1181 | 24.783  | 24.6507 | 24.7049 |
| G3BP2      | 22.1755 | 21.8601 | 21.7757 | 21.7866 | 21.833  | 22.7852 |
| G6PD       | 27.7891 | 24.7459 | 26.3095 | 26.2514 | 25.059  | 27.2011 |
| GAA        | 20.7435 | 20.0928 | 20.3224 | 20.7454 | 19.6987 | 17.4363 |
| GABARAP    | 16.1412 | 17.4218 | 16.6986 | 16.3958 | 15.9194 | 14.3164 |
| GABARAPL2  | 16.8982 | 16.7126 | 16.8385 | 17.0727 | 15.5652 | 15.6559 |
| GABPA      | 17.5165 | 17.6184 | 18.0868 | 18.384  | 17.3835 | 17.7921 |
| GADD45GIP1 | 17.4673 | 18.332  | 18.0257 | 18.4884 | 18.7939 | 18.7591 |
| GAK        | 19.4708 | 19.4994 | 19.3474 | 19.4887 | 19.6454 | 19.0613 |
| GALE       | 19.0145 | 17.6442 | 17.8417 | 16.6856 | 18.3114 | 19.591  |
| GALK1      | 20.247  | 19.0878 | 19.4855 | 18.8007 | 19.0639 | 19.2921 |

|         |         |         |         |         |         |         |
|---------|---------|---------|---------|---------|---------|---------|
| GALNS   | 18.9452 | 18.7922 | 19.9192 | 19.9631 | 17.9925 | 17.9462 |
| GALNT1  | 18.1442 | 17.7007 | 17.3807 | 17.588  | 17.9564 | 16.7321 |
| GALNT2  | 22.6353 | 23.7552 | 23.4989 | 23.7829 | 22.9581 | 22.9305 |
| GALNT7  | 19.3832 | 18.9171 | 20.5312 | 20.1287 | 19.0963 | 19.8936 |
| GANAB   | 27.5315 | 27.6865 | 27.4926 | 27.5495 | 27.5618 | 26.5439 |
| GAPDH   | 30.6257 | 29.3758 | 29.0814 | 28.885  | 29.5305 | 29.9497 |
| GAR1    | 20.613  | 21.6872 | 21.4781 | 21.4941 | 21.7505 | 21.839  |
| GARS    | 24.4107 | 23.9068 | 23.5565 | 23.1264 | 24.6972 | 24.4253 |
| GART    | 22.9555 | 22.0438 | 22.9797 | 22.432  | 22.4578 | 23.5304 |
| GATAD2B | 19.9534 | 18.6625 | 20.3034 | 20.5117 | 18.6281 | 20.4226 |
| GATB    | 15.8641 | 15.5678 | 16.7685 | 16.4753 | 14.0297 | 15.1416 |
| GBA     | 22.6769 | 22.8045 | 22.3793 | 22.5571 | 22.3824 | 22.1355 |
| GBAS    | 20.7935 | 20.4205 | 20.1887 | 20.9834 | 20.109  | 21.1331 |
| GBE1    | 23.7034 | 22.6846 | 22.1216 | 22.1339 | 23.0387 | 23.4776 |
| GBF1    | 20.6001 | 20.4896 | 20.4973 | 20.0131 | 21.2924 | 20.2194 |
| GBP1    | 18.2838 | 17.5815 | 17.5399 | 16.6358 | 18.795  | 17.9388 |
| GCAT    | 15.2606 | 16.449  | 16.9778 | 17.7288 | 16.0811 | 15.749  |
| GCDH    | 15.8495 | 17.7699 | 17.6651 | 17.7313 | 16.8232 | 16.2443 |
| GCLC    | 21.3396 | 17.0181 | 20.5064 | 19.9443 | 17.2414 | 20.0639 |
| GCLM    | 22.0485 | 20.3159 | 21.2821 | 21.4741 | 21.3631 | 22.0288 |
| GCN1    | 20.8814 | 21.3236 | 21.7097 | 21.5059 | 22.1838 | 22.7253 |
| GDI1    | 23.6486 | 21.6367 | 20.5719 | 20.1454 | 22.6033 | 23.2125 |
| GDI2    | 25.1283 | 23.8795 | 23.4222 | 23.1541 | 24.5351 | 25.4236 |
| GEMIN4  | 19.1542 | 19.2737 | 20.1216 | 19.8017 | 19.8582 | 20.6373 |
| GEMIN5  | 20.5569 | 20.2802 | 21.8336 | 21.4998 | 20.6111 | 21.1472 |
| GFAP    | 13.4068 | 13.5475 | 13.9549 | 13.5057 | 13.7038 | 18.4315 |
| GFER    | 15.236  | 11.3976 | 14.6336 | 15.5066 | 13.0675 | 11.9805 |
| GFM1    | 22.6415 | 22.8458 | 23.8452 | 23.698  | 23.1566 | 23.6176 |
| GFM2    | 17.8638 | 18.6348 | 20.4735 | 20.4122 | 19.0554 | 18.8153 |
| GFPT1   | 23.3919 | 22.9728 | 22.9076 | 22.1795 | 24.4348 | 23.767  |
| GFPT2   | 24.7472 | 26.703  | 22.7905 | 23.835  | 26.8687 | 24.0436 |
| GFRA1   | 12.7175 | 10.6781 | 17.3954 | 18.5693 | 11.1522 | 19.6911 |
| GGCT    | 20.531  | 19.4653 | 19.3308 | 19.1088 | 19.7625 | 20.976  |
| GGCX    | 16.9931 | 18.9958 | 18.6701 | 18.6343 | 18.6292 | 16.3768 |
| GGH     | 21.2427 | 22.1564 | 22.3707 | 22.7154 | 21.8488 | 21.2778 |
| GGT5    | 13.3955 | 13.9835 | 17.9625 | 17.7538 | 13.349  | 12.2471 |
| GGT7    | 17.5794 | 17.0141 | 18.0466 | 17.9814 | 16.9605 | 16.566  |
| GIGYF2  | 18.6724 | 18.0703 | 18.9278 | 18.9667 | 17.8662 | 18.5372 |
| GINS4   | 17.9892 | 17.816  | 18.7308 | 18.2754 | 18.4207 | 17.8404 |
| GIPC1   | 18.7475 | 19.5574 | 19.44   | 19.8341 | 17.7903 | 20.6839 |
| GIT1    | 18.0344 | 16.7881 | 17.6034 | 17.4238 | 17.1428 | 18.3809 |
| GLA     | 20.4747 | 20.3067 | 21.5952 | 21.7174 | 19.4848 | 20.1465 |
| GLB1    | 21.402  | 22.1384 | 21.4999 | 21.8367 | 21.7803 | 21.3043 |
| GLE1    | 15.9709 | 17.8161 | 17.5213 | 17.6865 | 17.9041 | 17.5824 |
| GLG1    | 23.1232 | 23.1942 | 23.6092 | 23.6409 | 23.0923 | 22.2535 |
| GLIPR1  | 17.2845 | 17.8976 | 17.9794 | 17.7002 | 18.2966 | 18.1796 |
| GLIPR2  | 19.4371 | 17.7522 | 18.2998 | 19.2925 | 17.5278 | 20.4557 |
| GLMP    | 16.2111 | 19.9917 | 16.3459 | 15.8576 | 19.7784 | 16.5625 |
| GLO1    | 22.7506 | 21.4733 | 21.2833 | 21.3303 | 21.7143 | 23.1977 |
| GLRX3   | 22.911  | 21.3129 | 22.6263 | 22.329  | 21.8367 | 23.4851 |
| GLS     | 23.2014 | 24.1021 | 23.6641 | 23.8407 | 23.9672 | 23.6985 |
| GLUD1   | 24.6499 | 23.9779 | 24.4001 | 24.6385 | 24.3584 | 24.482  |

|         |         |         |         |         |         |         |
|---------|---------|---------|---------|---------|---------|---------|
| GLYR1   | 19.2008 | 20.2951 | 20.0941 | 20.3066 | 20.031  | 19.7423 |
| GMDS    | 19.0796 | 16.4023 | 17.4805 | 17.1945 | 16.3288 | 19.5731 |
| GMPPA   | 20.9241 | 21.2293 | 20.2814 | 20.2104 | 21.539  | 20.6878 |
| GMPPB   | 20.6597 | 20.3915 | 19.505  | 19.2433 | 21.0471 | 20.3183 |
| GMPS    | 23.026  | 22.704  | 23.1393 | 22.8882 | 22.8094 | 23.1701 |
| GNA11   | 19.6708 | 20.696  | 19.9238 | 20.2414 | 20.495  | 20.201  |
| GNA13   | 20.763  | 20.9421 | 21.3749 | 21.6334 | 20.6718 | 20.6924 |
| GNAI1   | 18.512  | 18.6545 | 19.409  | 19.4954 | 18.6152 | 16.2188 |
| GNAI2   | 23.0567 | 24.845  | 24.0037 | 24.0623 | 24.8871 | 24.3955 |
| GNAI3   | 21.741  | 22.1332 | 22.0702 | 22.1906 | 22.3667 | 22.4038 |
| GNAO1   | 19.2408 | 10.6909 | 14.0724 | 16.2158 | 12.5366 | 9.81329 |
| GNAQ    | 18.0607 | 19.2949 | 18.35   | 18.6914 | 19.0367 | 17.7109 |
| GNAS    | 21.7539 | 23.6082 | 22.9954 | 23.1947 | 23.6354 | 22.6139 |
| GNB1    | 22.9915 | 23.4444 | 22.4595 | 22.9486 | 23.246  | 23.2433 |
| GNB2    | 23.1565 | 23.5751 | 22.7994 | 23.1948 | 23.5076 | 22.4942 |
| GNB2L1  | 26.555  | 26.7904 | 26.6661 | 26.6354 | 26.9612 | 27.2387 |
| GNB4    | 19.3383 | 20.2252 | 19.9849 | 20.2302 | 18.7048 | 18.5947 |
| GNE     | 18.5499 | 18.5396 | 18.603  | 18.3804 | 19.3039 | 19.1484 |
| GNG12   | 19.0337 | 19.9973 | 17.7631 | 18.7673 | 20.3518 | 18.4001 |
| GNL1    | 21.1739 | 20.3954 | 19.6944 | 19.4759 | 20.8143 | 21.5013 |
| GNL3    | 18.9569 | 21.1237 | 21.4969 | 21.1464 | 21.2645 | 21.2192 |
| GNPAT   | 17.7203 | 18.1638 | 18.895  | 18.8037 | 18.1291 | 17.1986 |
| GNPDA1  | 24.5296 | 24.6357 | 24.4984 | 24.9043 | 24.6124 | 23.84   |
| GNS     | 23.0852 | 23.906  | 22.844  | 23.2185 | 23.8245 | 22.6184 |
| GOLGA2  | 19.3624 | 19.0674 | 18.9533 | 18.9545 | 19.407  | 18.4111 |
| GOLGA3  | 19.3722 | 18.292  | 18.5574 | 17.4488 | 19.2628 | 18.3697 |
| GOLGA4  | 18.2322 | 19.1784 | 18.1331 | 18.0027 | 19.6639 | 17.7483 |
| GOLGB1  | 21.0628 | 21.1857 | 21.2084 | 21.1126 | 21.4421 | 20.7621 |
| GOLIM4  | 18.5377 | 18.9048 | 18.6065 | 18.7137 | 18.8018 | 16.9079 |
| GOLPH3  | 18.6405 | 18.3558 | 19.4622 | 19.3801 | 18.5143 | 19.4532 |
| GOLT1B  | 20.2378 | 20.7702 | 20.9031 | 20.5621 | 20.7104 | 19.1208 |
| GOPC    | 18.4004 | 17.3358 | 17.9397 | 17.3622 | 17.7136 | 17.5147 |
| GORASP2 | 20.7824 | 20.5431 | 21.153  | 20.9424 | 20.3723 | 20.4754 |
| GOT1    | 23.0514 | 21.3004 | 21.6879 | 21.4649 | 21.7019 | 22.9436 |
| GOT2    | 25.6709 | 25.1284 | 26.1111 | 26.3201 | 25.1865 | 26.4322 |
| GPAT3   | 19.379  | 18.3819 | 20.6693 | 20.4613 | 18.976  | 18.6911 |
| GPAT4   | 16.5059 | 15.3959 | 16.4838 | 16.8123 | 16.042  | 16.9717 |
| GPC1    | 22.6311 | 20.1421 | 22.0519 | 22.2073 | 20.3626 | 21.6757 |
| GPC4    | 17.4176 | 18.711  | 18.8302 | 19.163  | 18.879  | 22.9421 |
| GPD1L   | 18.3201 | 16.5769 | 16.7549 | 16.6322 | 16.6795 | 18.1129 |
| GPD2    | 24.6745 | 23.6386 | 24.2725 | 24.3271 | 23.8741 | 24.458  |
| GPI     | 26.841  | 26.646  | 26.3375 | 26.1619 | 26.8856 | 27.0547 |
| GPKOW   | 17.9323 | 14.8926 | 18.7765 | 18.5137 | 13.8948 | 17.9126 |
| GPM6A   | 18.0426 | 12.4074 | 13.1654 | 13.5644 | 12.946  | 17.9296 |
| GPNMB   | 20.4084 | 21.8542 | 18.5705 | 18.4442 | 21.2837 | 17.4237 |
| GPS1    | 22.3173 | 21.5818 | 21.4707 | 21.4054 | 22.0778 | 22.5866 |
| GPT2    | 15.9292 | 13.57   | 18.4851 | 18.3311 | 14.4455 | 18.3206 |
| GPX1    | 18.796  | 19.5119 | 13.1837 | 12.3479 | 19.5957 | 15.4098 |
| GPX8    | 19.9929 | 21.6157 | 21.4483 | 21.1998 | 22.1213 | 20.3088 |
| GRAMD1A | 10.7465 | 14.4866 | 16.3602 | 16.4346 | 12.9362 | 13.6063 |
| GRB2    | 20.7014 | 20.2791 | 21.049  | 20.6017 | 20.9229 | 21.8779 |
| GRHPR   | 22.2535 | 20.4901 | 20.9383 | 21.2272 | 20.7262 | 22.3188 |

|         |         |         |         |         |         |         |
|---------|---------|---------|---------|---------|---------|---------|
| GRN     | 18.3884 | 19.6649 | 17.8692 | 17.9519 | 19.4742 | 15.8554 |
| GRPEL1  | 22.2255 | 22.3071 | 22.7932 | 22.8669 | 22.5531 | 22.8628 |
| GRSF1   | 21.8923 | 21.6281 | 22.0743 | 22.1146 | 21.8102 | 22.5134 |
| GRWD1   | 20.7412 | 20.7666 | 21.106  | 20.8535 | 20.8283 | 21.6299 |
| GSK3A   | 19.1211 | 17.2322 | 16.4739 | 16.6196 | 17.8013 | 19.3574 |
| GSK3B   | 19.6007 | 19.4019 | 18.2198 | 17.8953 | 20.0713 | 19.2265 |
| GSN     | 24.3854 | 22.8135 | 21.6741 | 21.4971 | 23.0803 | 21.7004 |
| GSPT1   | 23.7295 | 22.4143 | 22.5004 | 22.0533 | 22.557  | 23.3696 |
| GSR     | 25.0932 | 20.9195 | 23.381  | 23.2169 | 21.3317 | 23.3094 |
| GSS     | 22.4114 | 21.0269 | 20.67   | 20.6452 | 21.1051 | 21.3032 |
| GSTK1   | 21.3834 | 21.8099 | 21.2663 | 21.7836 | 21.8022 | 21.2994 |
| GSTM1   | 20.1182 | 16.686  | 14.4461 | 15.6103 | 16.8916 | 16.0874 |
| GSTM2   | 18.2764 | 16.9539 | 15.659  | 16.203  | 15.556  | 15.048  |
| GSTM3   | 24.2216 | 18.9892 | 21.9531 | 21.7779 | 18.5057 | 22.7093 |
| GSTM4   | 19.0892 | 18.0083 | 18.0706 | 17.6523 | 17.1009 | 16.9572 |
| GSTO1   | 23.6719 | 24.4951 | 23.0749 | 22.8829 | 25.3425 | 24.5275 |
| GSTP1   | 26.0436 | 23.7125 | 24.9234 | 25.0905 | 24.0964 | 24.6108 |
| GTF2B   | 16.2601 | 18.0621 | 17.8099 | 17.5035 | 17.7535 | 16.8982 |
| GTF2F2  | 17.6874 | 16.7588 | 18.7925 | 18.3549 | 16.7892 | 19.825  |
| GTF2H1  | 15.8111 | 16.775  | 16.4386 | 16.7329 | 16.0972 | 12.1504 |
| GTF2I   | 23.7137 | 23.621  | 24.2968 | 24.2906 | 23.4606 | 23.2905 |
| GTF3C1  | 15.4301 | 17.1203 | 17.8809 | 17.7109 | 16.3527 | 17.2071 |
| GTF3C3  | 18.7041 | 19.0718 | 19.9266 | 19.9007 | 18.7822 | 19.5466 |
| GTF3C4  | 18.6808 | 18.9674 | 19.7064 | 19.4563 | 19.0264 | 19.2697 |
| GTF3C5  | 17.9638 | 18.1424 | 18.5478 | 18.214  | 17.7057 | 18.5043 |
| GTPBP10 | 15.788  | 17.84   | 17.7789 | 17.8304 | 18.2904 | 17.7823 |
| GUF1    | 13.9077 | 14.6242 | 13.6422 | 14.482  | 12.2669 | 15.3254 |
| GUSB    | 19.3534 | 18.6693 | 18.8347 | 19.1617 | 18.7778 | 18.2058 |
| GXYLT1  | 16.7514 | 17.6102 | 18.0778 | 17.6429 | 18.1308 | 15.4086 |
| GYS1    | 19.2796 | 18.9644 | 20.1925 | 19.4042 | 19.3305 | 20.7619 |
| H1FX    | 19.2433 | 19.4625 | 19.3374 | 19.4461 | 18.8479 | 17.5752 |
| H2AFY   | 21.9721 | 22.576  | 23.3763 | 23.1371 | 23.2253 | 23.512  |
| H2AFZ   | 23.4859 | 23.5865 | 23.829  | 23.7832 | 23.7906 | 23.8019 |
| H3F3A   | 20.488  | 22.3272 | 22.3895 | 22.7089 | 20.9192 | 20.4489 |
| H6PD    | 18.454  | 19.5756 | 17.8647 | 18.3352 | 19.2414 | 16.2174 |
| HACD3   | 21.9132 | 22.5027 | 22.8367 | 23.0767 | 22.3577 | 22.5903 |
| HACL1   | 16.9236 | 19.6211 | 18.4411 | 18.3247 | 20.0487 | 19.4891 |
| HADH    | 23.4619 | 22.8754 | 23.0865 | 23.3642 | 22.6543 | 21.3756 |
| HADHA   | 25.1545 | 24.6232 | 24.7568 | 25.0342 | 24.5405 | 24.5548 |
| HADHB   | 24.6081 | 24.1441 | 23.8731 | 24.1243 | 24.2656 | 24.0059 |
| HARS    | 23.0915 | 22.2792 | 22.7431 | 22.4477 | 22.7075 | 23.9726 |
| HARS2   | 17.4494 | 17.2304 | 19.3509 | 19.1832 | 16.8219 | 17.2894 |
| HAT1    | 21.4924 | 21.0314 | 21.3116 | 20.9828 | 20.8795 | 21.9491 |
| HBA1    | 19.0645 | 16.8378 | 14.3712 | 14.5708 | 17.6021 | 14.9731 |
| HBD     | 21.2471 | 19.5635 | 17.9139 | 17.9756 | 20.0733 | 18.8665 |
| HBS1L   | 19.0084 | 18.9167 | 18.7092 | 18.484  | 19.64   | 20.4632 |
| HCCS    | 19.4752 | 19.49   | 19.9382 | 20.768  | 18.9205 | 20.8262 |
| HCFC1   | 22.8212 | 22.6419 | 23.1123 | 23.2107 | 22.5872 | 23.1611 |
| HDAC1   | 21.8575 | 21.6489 | 22.0059 | 22.2699 | 21.5736 | 21.7139 |
| HDAC2   | 17.79   | 18.6164 | 18.509  | 18.7994 | 16.905  | 17.2974 |
| HDAC3   | 18.587  | 18.4726 | 17.3746 | 17.2798 | 18.4876 | 19.2659 |
| HDAC6   | 15.3672 | 14.0431 | 14.9524 | 13.9635 | 12.1581 | 11.6548 |

|           |         |         |         |         |         |         |
|-----------|---------|---------|---------|---------|---------|---------|
| HDGF      | 22.4669 | 22.661  | 21.8531 | 21.5973 | 22.8879 | 22.6701 |
| HDLBP     | 24.739  | 24.7733 | 24.4741 | 24.5708 | 24.9631 | 24.1407 |
| HEATR1    | 18.3789 | 20.0102 | 20.9611 | 20.806  | 19.9982 | 20.3181 |
| HEATR3    | 17.2288 | 17.9056 | 17.9421 | 17.8299 | 17.4657 | 16.9997 |
| HEBP1     | 21.3601 | 21.2995 | 21.6662 | 21.9253 | 21.2528 | 20.4729 |
| HECTD1    | 17.4343 | 17.3166 | 15.6254 | 15.375  | 17.7243 | 15.5281 |
| HEXA      | 21.7132 | 22.2823 | 22.4722 | 22.521  | 21.9473 | 21.8731 |
| HEXB      | 24.448  | 25.1562 | 25.2774 | 25.2031 | 24.9047 | 24.4502 |
| HGS       | 20.9131 | 20.7604 | 20.1675 | 20.2115 | 21.434  | 20.7001 |
| HIBADH    | 23.5392 | 22.8903 | 23.727  | 23.8022 | 23.1022 | 21.8552 |
| HIBCH     | 20.6528 | 20.687  | 20.5711 | 20.6127 | 20.7365 | 20.5537 |
| HIGD1A    | 17.4548 | 17.8827 | 18.4237 | 18.8151 | 16.7218 | 16.3973 |
| HINT1     | 20.9165 | 20.3113 | 19.8193 | 20.1837 | 20.6029 | 20.6302 |
| HINT2     | 19.868  | 19.2929 | 20.3622 | 20.7823 | 19.4381 | 18.6962 |
| HIP1      | 21.467  | 20.3041 | 20.9957 | 20.7802 | 20.3353 | 19.1004 |
| HIP1R     | 15.0917 | 16.9303 | 15.5537 | 16.6073 | 15.7437 | 15.8443 |
| HIST1H1B  | 16.7639 | 19.7311 | 17.3919 | 17.567  | 19.4794 | 17.8402 |
| HIST1H1C  | 19.4719 | 20.8706 | 19.983  | 19.5624 | 20.8897 | 20.0688 |
| HIST1H2AE | 17.8155 | 19.9412 | 17.296  | 20.5693 | 19.5674 | 17.2046 |
| HIST1H2BJ | 24.8331 | 24.8819 | 25.2161 | 25.3685 | 24.8037 | 24.9827 |
| HIST1H2BK | 23.3436 | 23.8415 | 23.8542 | 23.5607 | 24.1267 | 23.5493 |
| HIST1H3D  | 21.8383 | 22.7469 | 23.5881 | 24.1196 | 20.9338 | 21.4654 |
| HIST1H4D  | 27.531  | 28.1288 | 28.8032 | 28.7644 | 28.3752 | 28.4768 |
| HIST2H2AC | 19.5782 | 21.2767 | 20.9958 | 20.4716 | 21.9255 | 17.1804 |
| HIST2H3A  | 21.5422 | 23.2028 | 24.0545 | 23.9261 | 21.4037 | 20.8747 |
| HK1       | 24.2009 | 25.5121 | 24.9731 | 25.1417 | 25.8525 | 25.6141 |
| HK2       | 21.9748 | 21.3705 | 21.3902 | 21.2987 | 21.2731 | 21.8481 |
| HLA-A     | 19.7929 | 16.2497 | 20.8598 | 21.766  | 16.0597 | 19.7063 |
| HLA-A     | 20.088  | 20.6019 | 18.2739 | 19.9713 | 20.2242 | 18.1842 |
| HLA-A     | 16.1641 | 16.8639 | 16.0802 | 16.6107 | 17.004  | 16.9274 |
| HLA-A     | 17.3603 | 17.5857 | 9.24914 | NA      | 16.3412 | 13.1345 |
| HLA-B     | 15.3531 | 17.6398 | 13.3971 | 15.6214 | 17.281  | 19.8945 |
| HLA-B     | 19.5409 | 20.1881 | 22.7302 | 23.055  | 19.9729 | 19.0421 |
| HLA-B     | 18.3952 | 15.4462 | 15.2087 | 14.8701 | 15.6887 | 14.1475 |
| HLA-DRA   | 22.1195 | 21.7485 | 21.7231 | 21.4831 | 21.6981 | 22.312  |
| HLA-DRB1  | 18.2982 | 17.5109 | 18.7049 | 18.2789 | 18.314  | 19.9516 |
| HM13      | 22.7786 | 22.9874 | 23.6285 | 23.5958 | 23.6702 | 23.21   |
| HMBS      | 17.7715 | 16.581  | 17.5312 | 17.673  | 15.2729 | 16.5956 |
| HMG20A    | 17.8315 | 18.3579 | 18.7066 | 19.3701 | 17.7484 | 17.1393 |
| HMGA2     | 15.4225 | 19.298  | 13.6302 | 13.3716 | 19.3445 | 13.2474 |
| HMGB1     | 23.5383 | 22.78   | 22.5328 | 22.439  | 22.7912 | 23.5987 |
| HMGB2     | 19.0931 | 18.0265 | 16.8615 | 16.7106 | 18.3809 | 18.4405 |
| HMGCL     | 20.9463 | 21.2566 | 20.4812 | 20.6859 | 21.0314 | 19.3786 |
| HMGCS1    | 20.1041 | 18.2948 | 19.5633 | 18.9801 | 19.0634 | 20.3567 |
| HMOX1     | 20.3171 | 20.6551 | 20.2176 | 20.3892 | 19.3922 | 21.8035 |
| HMOX2     | 19.6442 | 19.9332 | 20.4601 | 20.5376 | 19.4551 | 19.5206 |
| HNRNPA0   | 24.2804 | 24.4835 | 24.694  | 25.0325 | 23.9861 | 24.3947 |
| HNRNPA1   | 26.833  | 27.1706 | 27.0794 | 27.3596 | 26.9006 | 26.9953 |
| HNRNPA2B1 | 28.1286 | 28.178  | 28.3034 | 28.5508 | 28.1575 | 28.2055 |
| HNRNPA3   | 25.9974 | 26.2347 | 26.5279 | 26.6835 | 25.9779 | 25.9547 |
| HNRNPAB   | 23.4353 | 23.3343 | 23.6551 | 23.9556 | 23.3835 | 22.9393 |
| HNRNPC    | 26.1507 | 26.631  | 26.2378 | 26.5355 | 26.6276 | 26.4907 |



|           |         |         |         |         |         |         |
|-----------|---------|---------|---------|---------|---------|---------|
| HNRNPD    | 24.6967 | 25.0428 | 24.6382 | 24.8945 | 24.9932 | 24.7379 |
| HNRNPD1   | 23.9453 | 23.9626 | 24.1284 | 24.3672 | 23.8002 | 23.8897 |
| HNRNPF    | 23.9861 | 24.1386 | 23.8576 | 24.1919 | 23.9541 | 24.4254 |
| HNRNPH1   | 24.4306 | 24.6176 | 24.8933 | 25.2408 | 24.0896 | 24.382  |
| HNRNPH2   | 21.2133 | 21.8487 | 20.768  | 21.0874 | 21.682  | 21.4245 |
| HNRNPH3   | 24.2547 | 23.9039 | 24.1605 | 24.4213 | 24.0224 | 23.4893 |
| HNRNPK    | 27.3652 | 27.2987 | 27.4705 | 27.606  | 27.1761 | 27.5149 |
| HNRNPL    | 25.1422 | 25.4726 | 25.2106 | 25.4986 | 25.2556 | 25.2133 |
| HNRNPLL   | 20.8781 | 21.174  | 20.9186 | 20.7038 | 20.9505 | 20.7153 |
| HNRNPM    | 25.119  | 25.1266 | 25.0752 | 25.5071 | 24.862  | 25.3496 |
| HNRNPR    | 24.6325 | 24.7852 | 24.7914 | 24.8143 | 24.7018 | 25.1006 |
| HNRNPU    | 26.2192 | 26.409  | 26.8052 | 26.9531 | 26.3362 | 26.7473 |
| HNRNPU1   | 23.3275 | 23.5967 | 23.6556 | 23.8349 | 23.4708 | 23.4838 |
| HNRNPU2   | 24.5629 | 24.9806 | 24.4391 | 24.509  | 25.0009 | 24.306  |
| HOOK3     | 18.0291 | 15.7508 | 16.5821 | 16.3609 | 15.9008 | 16.3467 |
| HP1BP3    | 18.7191 | 18.8744 | 17.2905 | 15.8131 | 19.5778 | 18.867  |
| HPCAL1    | 22.3186 | 22.502  | 22.8812 | 22.7972 | 22.4947 | 21.6953 |
| HPRT1     | 22.9473 | 22.1035 | 22.0903 | 21.8094 | 22.6623 | 23.9856 |
| HRSP12    | 18.831  | 19.3538 | 20.2005 | 20.2284 | 19.1323 | 19.1091 |
| HS1BP3    | 19.027  | 17.485  | 17.4528 | 17.3158 | 16.8884 | 17.0246 |
| HS71A     | 25.7346 | 24.4689 | 25.3461 | 25.6467 | 24.4409 | 25.9329 |
| HSD17B10  | 24.7956 | 23.4555 | 24.3462 | 24.6331 | 23.5047 | 24.4125 |
| HSD17B11  | 18.8801 | 19.3818 | 18.3155 | 18.2725 | 19.1364 | 16.9347 |
| HSD17B12  | 19.66   | 21.0716 | 18.5295 | 18.5    | 20.8467 | 20.6133 |
| HSD17B4   | 25.1312 | 25.66   | 25.1199 | 25.3225 | 25.5649 | 24.6176 |
| HSD17B7   | 19.3752 | 19.6668 | 19.5437 | 19.8849 | 20.096  | 19.5295 |
| HSDL1     | 16.6927 | 17.8492 | 19.2354 | 19.375  | 17.2898 | 17.3865 |
| HSDL2     | 21.9725 | 21.158  | 21.966  | 22.1209 | 20.7864 | 20.8145 |
| HSP90AA1  | 27.4316 | 26.9091 | 26.7627 | 26.5852 | 27.2639 | 28.4917 |
| HSP90AB1  | 27.5156 | 27.1376 | 27.6628 | 27.45   | 27.7096 | 29.0892 |
| HSP90AB4P | 21.1169 | 20.1879 | 21.4828 | 21.3751 | 20.892  | 22.9815 |
| HSP90B1   | 28.7708 | 28.3443 | 28.3482 | 28.2106 | 28.4878 | 27.5431 |
| HSPA13    | 21.2227 | 20.2028 | 20.6047 | 20.4794 | 20.7856 | 19.9824 |
| HSPA14    | 18.6448 | 18.282  | 18.619  | 18.4823 | 17.9038 | 19.0004 |
| HSPA2     | 22.6499 | 18.518  | 18.6546 | 18.2285 | 18.8825 | 19.049  |
| HSPA4     | 25.5255 | 25.2491 | 25.4158 | 25.1875 | 25.4769 | 25.8811 |
| HSPA4L    | 21.5626 | 20.3843 | 20.7398 | 21.0658 | 20.4012 | 21.7071 |
| HSPA5     | 29.4254 | 29.2132 | 29.2894 | 29.2031 | 29.5068 | 28.6324 |
| HSPA8     | 28.293  | 27.9033 | 28.0305 | 28.0473 | 28.0785 | 28.624  |
| HSPA9     | 26.5246 | 26.4284 | 27.2221 | 27.4562 | 26.8375 | 27.1627 |
| HSPB1     | 26.0015 | 25.5057 | 26.1072 | 25.942  | 25.4107 | 26.469  |
| HSPB11    | 21.2121 | 20.3593 | 20.7637 | 20.6085 | 20.6029 | 20.9412 |
| HSPB6     | 17.8731 | 17.6111 | 17.1666 | 17.2535 | 16.7726 | 16.7546 |
| HSPBP1    | 20.0812 | 19.7444 | 19.2613 | 19.3531 | 19.6117 | 20.8146 |
| HSPD1     | 26.9968 | 27.0679 | 27.8056 | 28.2835 | 26.9365 | 28.5866 |
| HSPE1     | 23.161  | 23.6544 | 24.3754 | 24.714  | 23.7215 | 24.6965 |
| HSPH1     | 24.6853 | 23.5095 | 24.7746 | 24.4563 | 23.7659 | 25.4247 |
| HTATSF1   | 20.6137 | 20.472  | 20.439  | 20.4968 | 20.6937 | 20.493  |
| HTRA1     | 19.4749 | 18.2491 | 11.1619 | 13.1042 | 15.6595 | 10.6744 |
| HTRA2     | 18.2218 | 18.5331 | 18.6813 | 19.065  | 18.7605 | 18.5202 |
| HUWE1     | 19.5005 | 18.3841 | 18.7494 | 18.8435 | 18.055  | 18.8315 |
| HYOU1     | 25.9382 | 25.7144 | 26.0789 | 26.1565 | 25.821  | 25.1816 |

|         |         |         |         |         |         |         |
|---------|---------|---------|---------|---------|---------|---------|
| IARS    | 24.1766 | 23.425  | 23.6322 | 23.1508 | 24.0201 | 23.6992 |
| IARS2   | 22.7451 | 22.6675 | 23.0308 | 23.007  | 22.8597 | 23.1014 |
| IBA57   | 15.0495 | 14.611  | 16.4741 | 17.4281 | 14.974  | 15.7921 |
| ICAM1   | 19.0507 | 23.2313 | 19.5296 | 19.45   | 23.9532 | 18.9492 |
| ICT1    | 18.0931 | 18.5243 | 19.0207 | 18.9628 | 19.3798 | 19.3971 |
| IDE     | 21.8961 | 20.2014 | 20.8917 | 20.3843 | 20.851  | 21.6742 |
| IDH1    | 24.9813 | 23.3744 | 23.4754 | 23.1718 | 23.4354 | 23.8471 |
| IDH2    | 24.5549 | 24.1104 | 25.4302 | 25.9098 | 23.942  | 22.2038 |
| IDH3A   | 23.5899 | 22.6644 | 23.6696 | 23.7142 | 22.8868 | 24.0872 |
| IDH3B   | 22.0315 | 20.9922 | 22.1749 | 22.2883 | 21.3668 | 22.5862 |
| IDH3G   | 21.8356 | 20.1175 | 21.4927 | 21.7173 | 20.1556 | 22.1898 |
| IDI1    | 19.5115 | 18.5013 | 18.3152 | 18.5632 | 18.3112 | 19.1445 |
| IER3IP1 | 19.1123 | 20.0001 | 19.8109 | 19.7161 | 20.0822 | 18.302  |
| IFI16   | 21.4959 | 23.425  | 21.4301 | 21.5215 | 23.2269 | 21.342  |
| IFI35   | 18.3874 | 18.6685 | 17.8854 | 17.5465 | 18.6706 | 18.3495 |
| IFIT1   | 19.3162 | 18.1566 | 15.9054 | 16.3942 | 17.8028 | 17.1349 |
| IFIT3   | 20.919  | 19.0854 | 18.9865 | 18.3809 | 18.9279 | 18.4762 |
| IFIT5   | 19.0362 | 17.3432 | 17.0209 | 17.1142 | 16.1484 | 18.4977 |
| IFRD1   | 17.09   | 14.7484 | 16.2548 | 16.2072 | 16.2082 | 16.7956 |
| IGF2BP2 | 18.6162 | 22.8167 | 21.9431 | 21.9748 | 23.1007 | 22.7634 |
| IGF2BP3 | 22.0866 | 23.8122 | 22.8621 | 22.5276 | 24.0754 | 21.0631 |
| IGF2R   | 23.2369 | 24.4826 | 23.694  | 23.753  | 24.877  | 23.386  |
| IGFBP7  | 18.5195 | 19.4399 | 18.2546 | 18.783  | 19.7918 | 22.123  |
| IK      | 19.4846 | 19.6109 | 20.2142 | 20.0821 | 19.6794 | 21.003  |
| IKBIP   | 22.2953 | 23.1903 | 22.1711 | 22.2415 | 23.7679 | 21.5082 |
| IKBKAP  | 18.0773 | 15.9296 | 17.8612 | 17.271  | 16.9902 | 18.7768 |
| IL6ST   | 19.6268 | 18.3046 | 19.3181 | 18.7279 | 18.9386 | 19.2447 |
| ILF2    | 24.7092 | 25.872  | 25.3905 | 25.738  | 25.7161 | 25.9357 |
| ILF3    | 24.1028 | 24.983  | 24.6781 | 24.8723 | 24.8758 | 25.1474 |
| ILK     | 20.6512 | 20.8958 | 19.0883 | 19.3798 | 21.471  | 19.58   |
| ILKAP   | 20.5512 | 20.6446 | 19.9511 | 20.2333 | 20.4859 | 20.3898 |
| ILVBL   | 20.3526 | 20.277  | 20.5968 | 20.7245 | 20.1264 | 21.0445 |
| IMMT    | 24.4323 | 24.6447 | 24.7054 | 24.9681 | 24.7689 | 24.882  |
| IMPA1   | 20.6043 | 19.1334 | 19.6933 | 19.0558 | 19.9504 | 21.7537 |
| IMPAD1  | 19.9239 | 20.0439 | 20.3467 | 20.2068 | 19.9717 | 19.5902 |
| IMPDH1  | 19.9067 | 18.365  | 19.9289 | 19.689  | 19.7428 | 19.8924 |
| IMPDH2  | 24.2372 | 23.9163 | 23.9958 | 23.763  | 24.3054 | 26.0095 |
| INF2    | 20.5121 | 20.4798 | 20.1318 | 20.0666 | 20.82   | 18.5333 |
| INPP5K  | 16.8889 | 17.6068 | 17.4444 | 17.0571 | 17.7333 | 18.035  |
| INPPL1  | 16.66   | 16.6119 | 16.7534 | 16.6425 | 17.2251 | 15.6776 |
| INTS1   | 17.1366 | 17.9581 | 18.9004 | 19.0693 | 17.4277 | 16.934  |
| INTS3   | 19.6036 | 20.3185 | 20.5573 | 20.5809 | 19.8568 | 19.4737 |
| INTS4   | 17.1416 | 18.0963 | 18.73   | 18.5005 | 17.5954 | 17.0777 |
| INTS5   | 15.7614 | 17.2026 | 18.2072 | 17.9667 | 15.917  | 15.8945 |
| INTS6   | 12.1216 | 15.4614 | 15.734  | 15.6729 | 15.2698 | 13.4481 |
| INTS9   | 16.7388 | 17.2653 | 17.6008 | 17.8181 | 14.7229 | 16.1994 |
| IPO11   | 18.4253 | 18.2392 | 18.7889 | 17.9529 | 18.7078 | 18.6067 |
| IPO4    | 21.7307 | 21.6694 | 20.9128 | 21.215  | 21.8943 | 22.4844 |
| IPO5    | 24.4212 | 24.4554 | 24.0862 | 23.6354 | 24.876  | 24.1654 |
| IPO7    | 24.3957 | 23.4079 | 23.9427 | 23.6016 | 23.7946 | 24.8242 |
| IPO8    | 17.1618 | 15.8051 | 17.7368 | 17.3227 | 15.9    | 16.2456 |
| IPO9    | 21.7874 | 20.9197 | 20.9211 | 20.548  | 21.4299 | 21.0434 |

|          |         |         |         |         |         |         |
|----------|---------|---------|---------|---------|---------|---------|
| IQGAP1   | 24.7438 | 24.8988 | 24.6458 | 24.0008 | 25.6361 | 25.6748 |
| IQGAP2   | 12.2251 | 8.12856 | 18.124  | 17.4145 | NA      | 8.71614 |
| IQGAP3   | 12.5799 | 12.7926 | 14.2222 | 12.8801 | 13.1603 | 14.6208 |
| IRF2BP2  | 19.829  | 20.3143 | 20.0232 | 20.3081 | 19.6619 | 19.8454 |
| IRF2BPL  | 19.6648 | 17.761  | 16.0861 | 16.9158 | 17.3537 | 17.4601 |
| ISG15    | 21.197  | 20.5015 | 19.3483 | 19.3629 | 19.008  | 20.0471 |
| ISOC1    | 23.1471 | 18.8708 | 19.3621 | 19.7743 | 18.544  | 19.8844 |
| ISOC2    | 20.3264 | 20.263  | 20.7877 | 20.8901 | 20.109  | 20.3177 |
| IST1     | 19.2642 | 19.297  | 18.8208 | 19.0189 | 19.2661 | 20.428  |
| ITCH     | 19.1571 | 18.4686 | 19.85   | 19.4027 | 18.9256 | 18.9354 |
| ITGA11   | 20.0952 | 19.5188 | 18.9418 | 18.9451 | 20.0344 | 20.3544 |
| ITGA2    | 22.9874 | 21.5036 | 22.6009 | 22.6587 | 22.1117 | 21.4396 |
| ITGA3    | 24.6451 | 25.4671 | 24.8954 | 25.5802 | 25.7646 | 24.8503 |
| ITGA4    | 18.1544 | 17.2574 | 15.9189 | 15.7507 | 18.088  | 17.5685 |
| ITGA5    | 21.4744 | 23.3009 | 21.3575 | 21.2724 | 24.0096 | 20.2236 |
| ITGA6    | 19.7751 | 20.5546 | 20.2728 | 19.5408 | 20.6573 | 19.9836 |
| ITGA8    | 19.8805 | 17.2675 | 17.2194 | 18.5716 | 17.085  | 16.6229 |
| ITGAV    | 23.3463 | 23.4846 | 22.8419 | 22.768  | 23.3982 | 22.5624 |
| ITGB1    | 24.6632 | 26.3624 | 24.4762 | 24.7173 | 26.2762 | 24.251  |
| ITGB3    | 20.6638 | 18.6055 | 20.4017 | 20.0453 | 19.6221 | 19.5656 |
| ITGB4    | 19.4745 | 19.6062 | 18.9819 | 19.27   | 20.0091 | 22.3177 |
| ITGB5    | 19.6709 | 21.0997 | 19.6197 | 19.2486 | 20.2605 | 18.1222 |
| ITIH2    | 19.65   | 17.615  | 15.8176 | 15.6768 | 18.3727 | 15.2595 |
| ITIH3    | 19.2342 | 19.2043 | 17.6797 | 18.0394 | 18.3839 | 15.9723 |
| ITM2B    | 19.9243 | 19.2494 | 19.5581 | 19.6107 | 18.6627 | 20.6709 |
| ITM2C    | 18.2798 | 18.0992 | 18.9146 | 19.5071 | 16.9439 | 18.158  |
| ITPA     | 21.4839 | 20.8871 | 20.3167 | 20.4497 | 20.9989 | 21.6886 |
| ITPK1    | 17.3224 | 16.8253 | 14.3896 | 14.7479 | 16.0417 | 16.2783 |
| ITPR3    | 16.9973 | 17.3503 | 17.6841 | 17.1488 | 16.7847 | 15.1048 |
| ITSN2    | 19.5152 | 19.2447 | 17.7512 | 18.2276 | 19.355  | 19.6333 |
| IVD      | 19.5214 | 20.1317 | 19.5574 | 19.9293 | 19.9378 | 19.1393 |
| IVNS1ABP | 20.3155 | 20.359  | 20.4226 | 20.3521 | 20.6198 | 20.6664 |
| JAK1     | 16.8919 | 17.5937 | 17.909  | 18.3975 | 16.9772 | 15.173  |
| JMJD6    | 18.5432 | 19.1333 | 19.2745 | 18.894  | 18.8235 | 19.3561 |
| JUP      | 15.1828 | 15.444  | 15.1198 | 14.9954 | 14.7429 | 14.3835 |
| KANK2    | 20.2625 | 19.27   | 18.1971 | 18.3068 | 19.2381 | 17.4028 |
| KARS     | 24.7555 | 23.6065 | 24.4148 | 24.2766 | 24.0762 | 24.6898 |
| KCMF1    | 17.1591 | 13.8274 | 16.4263 | 16.1167 | 12.854  | 15.8229 |
| KCTD12   | 24.426  | 21.5536 | 21.406  | 21.2549 | 21.9731 | 22.6696 |
| KCTD5    | 14.6013 | 15.857  | 16.6893 | 16.8066 | 13.0275 | 13.906  |
| KDELC1   | 19.2024 | 20.8044 | 20.1136 | 20.2083 | 20.1422 | 19.1338 |
| KDELC2   | 21.429  | 22.458  | 21.9799 | 22.3522 | 21.5383 | 20.3524 |
| KDELR1   | 20.0555 | 19.9481 | 19.9273 | 20.0988 | 19.2521 | 18.7249 |
| KDELR2   | 19.4238 | 20.8084 | 21.1011 | 20.9126 | 20.0645 | 20.2376 |
| KDM1A    | 20.831  | 21.2591 | 21.3866 | 21.453  | 20.7648 | 20.7472 |
| KDM2A    | 16.3234 | 17.1279 | 18.2948 | 18.6975 | 17.531  | 16.6229 |
| KDM3B    | 19.3469 | 19.3739 | 19.5275 | 19.5695 | 19.1009 | 18.3388 |
| KDSR     | 18.7355 | 19.7846 | 18.8183 | 18.5735 | 19.822  | 16.4848 |
| KHDRBS1  | 24.1495 | 23.9687 | 23.9101 | 24.3264 | 23.815  | 24.1882 |
| KHSRP    | 24.2867 | 24.8613 | 24.2237 | 24.6477 | 24.6138 | 24.7695 |
| KIAA0196 | 18.8105 | 18.4292 | 18.7502 | 18.4648 | 19.0473 | 18.3815 |
| KIAA0368 | 20.3974 | 20.5225 | 20.9215 | 20.3855 | 20.9162 | 20.6312 |

|          |         |         |         |         |         |         |
|----------|---------|---------|---------|---------|---------|---------|
| KIAA0391 | 17.2764 | 19.1527 | 18.0944 | 18.4542 | 19.3636 | 19.2158 |
| KIAA1033 | 17.4498 | 17.6598 | 16.4896 | 15.7531 | 18.066  | 15.5401 |
| KIAA1429 | 17.7514 | 19.0164 | 18.7543 | 18.8358 | 18.5682 | 17.6785 |
| KIAA1468 | 18.9705 | 17.4391 | 16.3842 | 15.7894 | 18.1346 | 16.1998 |
| KIAA1524 | 20.0786 | 18.672  | 19.7948 | 18.7477 | 18.9635 | 20.7657 |
| KIAA1715 | 20.7425 | 19.7318 | 20.8042 | 20.485  | 20.4615 | 19.275  |
| KIAA2013 | 19.968  | 19.8894 | 19.6088 | 19.5264 | 19.8208 | 20.9297 |
| KIF11    | 18.6787 | 18.3176 | 18.5531 | 18.1109 | 18.7925 | 17.9214 |
| KIF15    | 15.7744 | 16.3831 | 16.7718 | 15.8927 | 15.7171 | 15.7731 |
| KIF1BP   | 19.7888 | 18.7521 | 19.5157 | 19.2251 | 19.7297 | 20.5181 |
| KIF20A   | 19.863  | 18.8899 | 19.5746 | 19.2108 | 18.9451 | 19.6994 |
| KIF23    | 19.889  | 19.4827 | 20.731  | 20.4388 | 19.7544 | 20.043  |
| KIF2A    | 19.39   | 19.1106 | 19.7238 | 19.4094 | 19.5541 | 19.9352 |
| KIF2C    | 19.0825 | 16.6458 | 19.2016 | 18.5917 | 17.5001 | 19.2454 |
| KIF4A    | 16.6429 | 15.3984 | 16.6783 | 15.2345 | 15.6967 | 16.6495 |
| KIF5A    | 11.121  | 18.4477 | 9.47599 | 11.1956 | 19.6685 | 12.7892 |
| KIF5B    | 23.8027 | 22.6469 | 22.3628 | 21.9805 | 23.2595 | 23.295  |
| KIFC1    | 17.0422 | 14.6041 | 15.4588 | 15.3784 | 14.6338 | 16.0789 |
| KIRREL   | 17.9341 | 18.2616 | 18.0647 | 18.3376 | 18.6086 | 17.6721 |
| KLC1     | 19.4086 | 18.1638 | 16.4619 | 16.2249 | 19.2856 | 18.9951 |
| KLC2     | 19.8126 | 18.2599 | 18.2984 | 17.7688 | 19.0129 | 19.2369 |
| KPNA1    | 20.5245 | 20.3181 | 20.3441 | 20.0501 | 20.1914 | 20.246  |
| KPNA2    | 23.1145 | 23.6063 | 23.9951 | 24.1741 | 23.4951 | 24.8661 |
| KPNA3    | 21.2069 | 21.085  | 21.6762 | 21.4892 | 20.9237 | 21.9789 |
| KPNA4    | 21.6149 | 21.952  | 21.6884 | 21.5086 | 21.3459 | 21.7659 |
| KPNA6    | 21.2688 | 21.0015 | 21.8151 | 21.1242 | 22.1407 | 21.3553 |
| KPNB1    | 25.3951 | 25.2921 | 25.1779 | 25.2826 | 25.3538 | 26.0984 |
| KRT1     | 22.1499 | 23.3685 | 22.3345 | 22.9627 | 23.788  | 23.7818 |
| KRT10    | 21.788  | 22.3066 | 21.9181 | 21.9596 | 22.8984 | 23.4935 |
| KRT14    | 11.7404 | 15.5    | 14.4629 | 13.4324 | 12.7554 | 19.7488 |
| KRT16    | 16.5359 | 16.6075 | 16.4801 | 16.6734 | 17.2854 | 19.1052 |
| KRT17    | 19.4191 | 18.7314 | 18.7184 | 19.0984 | 19.2482 | 21.41   |
| KRT18    | 21.5391 | 21.3029 | 21.091  | 20.9538 | 21.5755 | 21.0243 |
| KRT2     | 20.4981 | 21.2298 | 20.6008 | 20.5572 | 21.5669 | 21.8408 |
| KRT5     | 16.1663 | 15.2142 | 14.645  | 15.0796 | 16.244  | 17.4181 |
| KRT6A    | 16.7902 | 15.9763 | 17.0935 | 16.4141 | 16.1824 | 20.6635 |
| KRT8     | 22.8403 | 21.9596 | 21.9496 | 22.1736 | 22.565  | 22.9589 |
| KRT80    | 13.761  | 13.1618 | 13.3054 | 13.1019 | 14.707  | 13.2718 |
| KRT81    | 16.7581 | 17.902  | 17.8501 | 17.8358 | 18.3777 | 21.9364 |
| KRT9     | 20.1305 | 21.8701 | 20.4308 | 21.3399 | 22.0004 | 21.1496 |
| KRTCAP2  | 17.9703 | 20.1864 | 19.5746 | 19.6924 | 20.1052 | 18.2749 |
| KTN1     | 23.8419 | 23.4162 | 22.8728 | 22.9891 | 23.5387 | 23.1347 |
| KYNU     | 24.7384 | 20.9012 | 23.1415 | 22.4525 | 21.2581 | 19.5475 |
| L1CAM    | 14.8553 | 15.8303 | 16.3447 | 16.2097 | 15.6081 | 14.1518 |
| L2HGDH   | 17.8193 | 16.2987 | 18.0086 | 18.5072 | 15.4961 | 18.0077 |
| L3HYPDH  | 18.5697 | 17.4681 | 14.7419 | 13.6149 | 18.2056 | 19.327  |
| LACTB    | 19.214  | 22.0682 | 21.9235 | 22.2909 | 21.7076 | 21.651  |
| LACTB2   | 13.2649 | 15.4426 | 13.452  | 12.1495 | 15.5156 | 16.8239 |
| LAMA4    | 19.3845 | 18.6055 | 18.7748 | 18.9652 | 18.6029 | 16.783  |
| LAMB1    | 26.2312 | 23.91   | 24.2329 | 24.2566 | 24.1866 | 22.8111 |
| LAMB2    | 17.854  | 18.4333 | 18.6732 | 17.9106 | 17.6834 | 17.9625 |
| LAMB3    | 13.4564 | 13.9153 | 14.6247 | 13.541  | 17.527  | 11.9518 |

|          |         |         |         |         |         |         |
|----------|---------|---------|---------|---------|---------|---------|
| LAMC1    | 23.0348 | 23.4351 | 23.7394 | 23.4056 | 23.7261 | 21.6921 |
| LAMP1    | 22.0107 | 21.6771 | 21.6987 | 20.8106 | 22.3391 | 21.5383 |
| LAMP2    | 23.0059 | 22.6668 | 23.0081 | 22.4218 | 22.9012 | 23.2453 |
| LAMTOR1  | 21.1848 | 21.4091 | 20.5668 | 21.0065 | 21.3898 | 20.8409 |
| LAMTOR2  | 20.6117 | 20.918  | 19.761  | 19.579  | 21.3713 | 20.304  |
| LANCL1   | 21.391  | 21.0723 | 22.0672 | 21.7908 | 21.4397 | 21.2147 |
| LANCL2   | 17.5906 | 17.5709 | 17.2145 | 17.075  | 18.4667 | 18.2582 |
| LAP3     | 25.5108 | 24.0923 | 23.8641 | 23.7363 | 24.0923 | 24.9758 |
| LARP1    | 21.1019 | 20.3231 | 21.5567 | 21.1515 | 20.9846 | 21.278  |
| LARP4    | 17.3251 | 16.7326 | 18.0904 | 18.1152 | 15.9803 | 17.679  |
| LARP4B   | 17.4895 | 16.8426 | 17.3978 | 17.6242 | 17.7832 | 18.6356 |
| LARS     | 24.1802 | 23.5075 | 23.8275 | 23.436  | 24.0871 | 24.3811 |
| LARS2    | 19.1785 | 19.4515 | 19.3055 | 19.5076 | 19.5827 | 19.7669 |
| LAS1L    | 19.2215 | 20.3441 | 21.0064 | 21.08   | 20.5424 | 20.6799 |
| LASP1    | 22.7454 | 22.7698 | 22.5747 | 22.2503 | 23.4279 | 22.7055 |
| LBR      | 20.7265 | 20.7579 | 20.997  | 21.1795 | 21.3049 | 21.0028 |
| LCN2     | 10.5532 | 13.9969 | 11.1886 | 12.5544 | 15.0732 | NA      |
| LCP1     | 22.5017 | 20.8851 | 19.6227 | 21.4868 | 22.1544 | 22.678  |
| LDHA     | 27.6595 | 26.7923 | 26.9722 | 26.7788 | 26.9344 | 23.4068 |
| LDHAL6B  | 19.2183 | 19.4974 | 18.8527 | 18.8849 | 20.0713 | 19.9287 |
| LDHB     | 26.4159 | 25.9688 | 26.0555 | 25.893  | 26.3397 | 26.7931 |
| LDLR     | 18.2701 | 20.0094 | 19.0918 | 18.4787 | 20.1435 | 18.2684 |
| LEMD2    | 18.076  | 19.433  | 18.5467 | 18.7318 | 19.3959 | 18.1693 |
| LEMD3    | 17.5955 | 16.908  | 17.873  | 17.8146 | 17.196  | 17.5342 |
| LETM1    | 22.5583 | 22.3111 | 22.6589 | 22.7751 | 22.3757 | 23.4465 |
| LGALS1   | 25.7369 | 26.4757 | 26.2679 | 26.6857 | 26.6385 | 25.1207 |
| LGALS3   | 23.4854 | 22.7408 | 21.8962 | 21.7526 | 22.8238 | 20.4687 |
| LGALS3BP | 23.2163 | 22.8323 | 23.234  | 23.4318 | 22.1394 | 23.9591 |
| LGALS8   | 19.2667 | 18.3022 | 19.3039 | 19.0651 | 19.6329 | 18.786  |
| LGMN     | 19.2155 | 19.3053 | 19.6546 | 19.7846 | 19.3475 | 19.7871 |
| LIG1     | 18.649  | 18.1736 | 18.3937 | 18.2956 | 17.8317 | 18.7614 |
| LIG3     | 17.3736 | 17.5819 | 18.4184 | 18.8386 | 16.9509 | 18.2513 |
| LIMA1    | 24.0196 | 23.0757 | 23.3072 | 23.2817 | 23.0237 | 22.7506 |
| LIMCH1   | 18.8312 | 12.97   | 16.1605 | 17.0525 | 13.7582 | 18.8988 |
| LIMS1    | 20.4865 | 20.7428 | 20.6516 | 20.0606 | 21.4254 | 21.4599 |
| LIN7C    | 19.531  | 18.4749 | 19.2774 | 19.4698 | 18.3023 | 18.9575 |
| LIPA     | 18.8983 | 21.5125 | 20.6303 | 20.7523 | 20.8825 | 18.9715 |
| LLGL1    | 19.5869 | 19.6377 | 18.7749 | 18.8161 | 20.1286 | 18.3498 |
| LMAN1    | 23.6471 | 24.0717 | 23.5399 | 23.5851 | 24.8968 | 22.078  |
| LMAN2    | 24.1686 | 24.3781 | 24.0187 | 24.0991 | 24.4324 | 24.3705 |
| LMAN2L   | 20.2127 | 20.5058 | 21.1923 | 21.379  | 20.0388 | 20.0296 |
| LMF2     | 19.3509 | 19.3261 | 19.6041 | 19.7448 | 19.0294 | 17.5436 |
| LMNA     | 27.8531 | 28.3426 | 27.8033 | 28.0841 | 28.2042 | 27.4394 |
| LMNB1    | 25.4424 | 24.7991 | 25.9152 | 26.0016 | 24.8482 | 25.5958 |
| LMNB2    | 24.5645 | 24.6753 | 24.1639 | 24.6935 | 24.527  | 24.6979 |
| LMO7     | 20.0037 | 18.8405 | 18.4833 | 18.1228 | 19.1293 | 17.9695 |
| LNPEP    | 20.7711 | 20.4153 | 20.8515 | 20.4469 | 20.603  | 20.2193 |
| LONP1    | 23.0868 | 22.9951 | 23.2229 | 23.3369 | 22.7613 | 23.3449 |
| LONP2    | 17.8498 | 14.7715 | 17.4499 | 17.0367 | 14.7948 | 17.0751 |
| LOX      | 16.4289 | 19.9317 | 19.0247 | 17.8423 | 19.9197 | 13.668  |
| LOXL2    | 21.1608 | 21.5542 | 21.1368 | 21.2818 | 20.3469 | 20.4092 |
| LPCAT1   | 19.3614 | 20.2914 | 20.6711 | 20.9043 | 20.2671 | 20.5812 |

|         |         |         |         |           |         |         |
|---------|---------|---------|---------|-----------|---------|---------|
| LPCAT2  | 13.2585 | 19.1579 | 17.7823 | 15.7407   | 20.205  | 19.4233 |
| LPCAT4  | 14.8583 | 16.6997 | 16.8436 | 16.2962   | 16.1135 | 17.9278 |
| LPP     | 17.8841 | 15.442  | 15.629  | 16.0911   | 15.9957 | 16.9344 |
| LPXN    | 15.9291 | 21.3531 | 17.9262 | 17.0561   | 22.4705 | 16.1353 |
| LRCH3   | 17.1674 | 17.0568 | 18.2259 | 17.7156   | 16.6286 | 17.3802 |
| LRP1    | 20.7389 | 23.1573 | 20.4302 | 21.107    | 22.877  | 19.0814 |
| LRP10   | 17.8457 | 17.8631 | 15.5281 | 15.3386   | 17.9042 | 13.9593 |
| LRPAP1  | 21.2451 | 20.9619 | 20.5354 | 20.9074   | 20.747  | 20.7635 |
| LRPPRC  | 24.9039 | 25.2859 | 26.0435 | 26.134    | 25.411  | 25.7939 |
| LRRC1   | 15.6161 | 17.0381 | 17.5753 | 17.4217   | 17.4252 | 18.365  |
| LRRC15  | 18.7282 | 22.9409 | 18.3318 | 18.5      | 23.1448 | 18.1885 |
| LRRC40  | 19.425  | 18.4439 | 19.1854 | 18.482    | 19.3255 | 19.0015 |
| LRRC47  | 22.8814 | 22.1649 | 22.2549 | 22.197    | 22.4288 | 23.6415 |
| LRRC58  | 12.3773 | 14.2163 | 17.4548 | 16.888    | 14.6109 | 16.6873 |
| LRRC59  | 23.8195 | 24.89   | 24.4171 | 24.3222   | 24.937  | 24.9697 |
| LRRC8C  | 15.6597 | 17.5372 | 17.2939 | 17.9224   | 15.8597 | 15.9315 |
| LRRFIP1 | 20.5221 | 17.0907 | 18.9532 | 18.2593   | 18.9565 | 19.3186 |
| LRWD1   | 16.905  | 17.8614 | 18.2533 | 18.3218   | 17.7569 | 18.587  |
| LSG1    | 19.4396 | 20.068  | 20.3185 | 20.2229   | 20.0416 | 20.5827 |
| LSM12   | 21.1486 | 20.5241 | 20.84   | 20.5692   | 20.7501 | 21.2478 |
| LSM14B  | 18.0344 | 17.1219 | 17.4497 | 17.6315   | 16.3968 | 18.2266 |
| LSM2    | 21.0657 | 21.2065 | 20.8545 | 21.1782   | 20.8219 | 21.0408 |
| LSM7    | 19.7527 | 19.8887 | 19.958  | 19.792    | 19.9868 | 20.2393 |
| LSM8    | 18.432  | 18.7106 | 19.1926 | 19.6152   | 17.9538 | 18.7283 |
| LSS     | 21.8436 | 22.5514 | 22.5547 | 22.6638   | 22.5676 | 21.0309 |
| LTA4H   | 22.357  | 21.1845 | 21.1665 | 20.9791   | 21.706  | 22.4333 |
| LUC7L   | 18.4578 | 18.4395 | 17.5792 | 17.7593   | 17.7951 | 17.6551 |
| LUC7L2  | 21.2776 | 20.8751 | 20.2443 | 21.1814   | 20.825  | 21.4574 |
| LUC7L3  | 20.3519 | 20.0834 | 20.26   | 20.3536   | 19.9616 | 20.4269 |
| LUZP1   | 19.0596 | 18.8804 | 18.9652 | 19.3625   | 18.5628 | 19.0929 |
| LYAR    | 13.7817 | 12.7188 | 13.5545 | 13.0256   | 12.8712 | 17.9965 |
| LYPLA1  | 20.4546 | 20.4867 | 20.8904 | 20.7859   | 20.9068 | 21.0057 |
| LYPLA2  | 17.9999 | 18.1145 | 18.3089 | 17.9757   | 16.97   | 19.196  |
| M6PR    | 21.2485 | 21.8542 | 21.4832 | 21.6748   | 22.0588 | 21.864  |
| MACF1   | 20.6831 | 20.6438 | 20.5468 | 20.7038   | 20.8948 | 20.4814 |
| MAD1L1  | 18.9219 | 19.3041 | 19.2108 | 19.3546   | 18.821  | 19.1487 |
| MAD2L1  | 18.4308 | 17.2536 | 18.0378 | 17.9622   | 17.0256 | 19.9121 |
| MAGEA1  | 10.9555 | 12.5748 | 10.1974 | 11.8247   | 12.5589 | 13.4173 |
| MAGEA10 | 2.37828 | 9.36221 | 10.3996 | -0.752766 | 6.36649 | 12.6883 |
| MAGEC2  | 13.8153 | 13.4113 | 15.3121 | 14.8939   | 14.046  | 15.0032 |
| MAGED2  | 18.406  | 18.2733 | 19.6764 | 18.9259   | 18.8638 | 19.5024 |
| MAGOH   | 21.9469 | 22.9185 | 22.5992 | 22.8423   | 22.6711 | 22.7038 |
| MAGT1   | 18.8058 | 19.0552 | 18.3093 | 18.8463   | 19.5532 | 18.8008 |
| MAK16   | 15.9222 | 17.8244 | 18.339  | 18.5335   | 17.9008 | 19.3128 |
| MALSU1  | 17.0617 | 17.9651 | 18.3432 | 18.2462   | 18.3848 | 17.5638 |
| MALT1   | 19.7107 | 17.6486 | 17.2398 | 17.02     | 17.4212 | 19.4872 |
| MAN1A1  | 16.2846 | 18.7384 | 15.4249 | 14.5988   | 18.9514 | 17.2901 |
| MAN1B1  | 19.848  | 20.3703 | 20.5465 | 20.2091   | 19.9137 | 19.0175 |
| MAN2A1  | 17.9081 | 21.2726 | 19.2054 | 19.4463   | 21.0871 | 19.1707 |
| MAN2B1  | 20.3106 | 20.6845 | 20.2444 | 20.7273   | 20.0923 | 20.1661 |
| MANF    | 22.2857 | 22.5419 | 23.0717 | 23.0494   | 22.4153 | 22.3017 |
| MAP1A   | 21.134  | 19.0753 | 17.8598 | 17.6177   | 20.0953 | 17.2091 |

|        |         |         |         |         |         |         |
|--------|---------|---------|---------|---------|---------|---------|
| MAP1B  | 25.0323 | 23.7328 | 24.1398 | 23.6001 | 24.9166 | 25.3644 |
| MAP1S  | 17.399  | 17.2408 | 16.0514 | 15.6427 | 17.232  | 16.2046 |
| MAP2K1 | 19.2561 | 18.4596 | 17.8799 | 17.838  | 19.108  | 19.952  |
| MAP2K2 | 18.0935 | 17.5924 | 16.8538 | 16.8445 | 17.8793 | 19.618  |
| MAP2K3 | 15.0602 | 18.5195 | 15.5057 | 16.5393 | 18.8411 | 16.9482 |
| MAP4   | 23.2403 | 21.7207 | 22.3644 | 22.1174 | 22.6395 | 23.8147 |
| MAP4K4 | 21.2046 | 21.3076 | 21.1423 | 21.2903 | 21.8989 | 21.1052 |
| MAPK1  | 22.4377 | 21.4493 | 20.914  | 20.4729 | 22.4734 | 21.8936 |
| MAPK14 | 18.8554 | 18.2445 | 17.9163 | 17.9347 | 17.348  | 17.9233 |
| MAPRE1 | 23.4193 | 22.542  | 23.2293 | 23.2341 | 22.9734 | 24.1525 |
| MAPRE2 | 19.0443 | 16.6386 | 17.8639 | 17.8424 | 15.9453 | 18.5328 |
| MARCH5 | 17.9091 | 18.468  | 18.8511 | 18.5645 | 18.1619 | 18.6655 |
| MARCKS | 22.2396 | 20.8873 | 21.1681 | 20.508  | 21.4134 | 22.0461 |
| MARS   | 22.5515 | 21.6161 | 22.3472 | 22.2259 | 22.3713 | 23.407  |
| MAT2A  | 23.9518 | 22.6029 | 23.2397 | 22.5112 | 23.642  | 23.4455 |
| MAT2B  | 20.2055 | 18.7857 | 19.3814 | 18.0447 | 20.5917 | 18.2812 |
| MATR3  | 25.5811 | 25.8401 | 25.9182 | 26.0937 | 25.7722 | 25.5799 |
| MAVS   | 20.9485 | 20.5012 | 22.4167 | 22.3825 | 20.882  | 21.0763 |
| MBD3   | 16.8692 | 17.8025 | 17.9439 | 18.2089 | 16.9997 | 17.4304 |
| MBLAC2 | 16.5649 | 17.3602 | 17.9102 | 18.11   | 16.7037 | 17.4779 |
| MBNL1  | 21.5376 | 20.5297 | 21.1711 | 21.1179 | 20.688  | 21.2507 |
| MBOAT7 | 19.4424 | 20.8765 | 20.737  | 20.7277 | 21.2215 | 19.9575 |
| MCAM   | 21.2433 | 19.9304 | 20.4125 | 20.6515 | 20.4675 | 20.4148 |
| MCAT   | 16.1708 | 16.9877 | 18.6606 | 18.9846 | 16.7766 | 17.6148 |
| MCCC1  | 19.237  | 18.9258 | 20.2187 | 20.0092 | 18.9507 | 19.6169 |
| MCCC2  | 21.2009 | 21.9534 | 22.4107 | 22.5028 | 22.0268 | 21.9482 |
| MCM2   | 23.8566 | 23.4786 | 23.2927 | 23.2666 | 23.2436 | 23.4717 |
| MCM3   | 24.1089 | 23.7558 | 23.6563 | 23.6611 | 23.5723 | 23.9302 |
| MCM4   | 23.7825 | 23.2185 | 23.0424 | 23.2815 | 22.8415 | 23.4    |
| MCM5   | 23.3819 | 22.9944 | 23.1034 | 23.1586 | 22.9524 | 22.809  |
| MCM6   | 24.465  | 23.9633 | 23.7637 | 23.7391 | 23.7437 | 23.9473 |
| MCM7   | 24.564  | 24.0278 | 23.6785 | 23.9027 | 23.7307 | 24.0587 |
| MCMBP  | 18.7501 | 20.0827 | 19.2079 | 18.8378 | 19.787  | 18.8533 |
| MCTS1  | 21.418  | 20.6523 | 21.2438 | 20.8039 | 21.3162 | 21.8013 |
| MCU    | 18.0114 | 18.3659 | 18.2103 | 18.369  | 18.1629 | 18.8622 |
| MDC1   | 18.6587 | 19.3372 | 19.22   | 19.4125 | 19.3063 | 18.7156 |
| MDH1   | 24.5019 | 23.9174 | 23.2984 | 23.1975 | 24.4807 | 25.0263 |
| MDH2   | 26.8336 | 26.3472 | 26.815  | 27.2988 | 26.2231 | 27.0714 |
| MDN1   | 16.7341 | 17.5632 | 16.7413 | 17.2489 | 17.5051 | 16.2971 |
| ME1    | 20.0298 | 18.5258 | 18.1223 | 17.6402 | 18.738  | 18.223  |
| ME2    | 22.0503 | 21.39   | 21.9116 | 21.9503 | 21.9776 | 21.5722 |
| ME3    | 12.6963 | 15.6534 | 12.0839 | 11.5752 | 14.1416 | 9.14313 |
| MECR   | 12.9336 | 14.6359 | 16.9084 | 16.58   | 11.6244 | 13.7556 |
| MED1   | 17.3688 | 17.3406 | 18.1366 | 17.9464 | 17.1831 | 15.4286 |
| MED14  | 10.6411 | 15.6899 | 16.7853 | 16.8073 | 15.6232 | 16.3142 |
| MED17  | 15.2655 | 16.5392 | 16.2299 | 17.1387 | 14.7658 | 16.9517 |
| MED23  | 15.8202 | 16.4437 | 17.0542 | 17.2846 | 15.1815 | 15.9383 |
| MEMO1  | 19.014  | 17.6564 | 17.5452 | 16.1828 | 17.5908 | 19.348  |
| MESDC2 | 22.3797 | 22.5049 | 23.0169 | 22.908  | 22.5364 | 22.2756 |
| MET    | 13.8202 | 17.2321 | 18.6226 | 17.9768 | 17.2283 | 16.5968 |
| METAP1 | 22.0201 | 21.8604 | 22.0822 | 22.2159 | 22.0052 | 22.1565 |
| METAP2 | 21.9987 | 21.1217 | 20.5859 | 19.9951 | 21.2604 | 21.5928 |

|          |         |         |         |         |         |         |
|----------|---------|---------|---------|---------|---------|---------|
| MFF      | 18.2405 | 17.0735 | 18.3418 | 18.6663 | 17.1173 | 18.2412 |
| MFN1     | 15.8376 | 15.3203 | 17.9714 | 17.9841 | 14.9319 | 15.6643 |
| MGAT1    | 19.0244 | 20.9264 | 19.9445 | 20.1952 | 20.5435 | 18.8229 |
| MGAT2    | 18.6939 | 19.8788 | 18.633  | 18.6644 | 20.3418 | 18.8908 |
| MGEA5    | 20.5627 | 19.1427 | 19.5481 | 18.5284 | 20.7475 | 20.2329 |
| MGLL     | 17.5908 | 18.0029 | 17.1201 | 16.7306 | 18.9688 | 17.3948 |
| MGST1    | 22.6101 | 21.9147 | 23.3633 | 23.3681 | 22.4752 | 23.1654 |
| MGST3    | 19.5219 | 19.9124 | 19.6378 | 18.8563 | 20.9563 | 18.0894 |
| MIA3     | 20.0247 | 20.1829 | 20.3807 | 20.4477 | 20.7447 | 19.1901 |
| MICU1    | 16.7671 | 17.4773 | 18.2781 | 18.2264 | 16.2835 | 16.7945 |
| MICU2    | 17.6702 | 17.4235 | 17.6032 | 18.0453 | 16.586  | 17.6417 |
| MID1     | 16.2553 | 15.8678 | 16.0089 | 15.8159 | 16.3614 | 18.4428 |
| MIER1    | 16.9473 | 17.0172 | 17.223  | 17.3129 | 17.5309 | 17.056  |
| MIF      | 24.6935 | 23.2491 | 23.3572 | 23.253  | 23.4521 | 18.9552 |
| MINA     | 18.5039 | 19.4782 | 20.3484 | 20.0052 | 19.2672 | 18.2197 |
| MINPP1   | 19.4086 | 20.0886 | 20.4843 | 20.6415 | 19.0229 | 21.0648 |
| MIPEP    | 18.3581 | 18.3729 | 19.4894 | 19.7223 | 17.8496 | 18.8156 |
| MKI67    | 19.8728 | 19.6408 | 21.3437 | 21.3692 | 20.3486 | 19.6879 |
| MKLN1    | 19.1498 | 17.8757 | 18.202  | 17.8688 | 18.2712 | 17.4024 |
| MLEC     | 22.5337 | 22.4775 | 22.621  | 22.5016 | 22.5349 | 21.6122 |
| MLH1     | 15.3388 | 15.557  | 16.1082 | 15.6297 | 15.6279 | 16.4344 |
| MLLT4    | 19.0171 | 17.9632 | 17.5943 | 17.5074 | 17.9798 | 17.1554 |
| MME      | 20.6128 | 23.6367 | 20.0971 | 19.6982 | 23.2524 | 19.5759 |
| MMP1     | 17.293  | 21.6409 | 17.1085 | 17.4054 | 22.7313 | 17.3218 |
| MMP14    | 23.1088 | 22.8055 | 20.2886 | 20.6784 | 22.5952 | 19.6667 |
| MMP2     | 20.2012 | 21.244  | 20.5188 | 20.2407 | 20.7815 | 17.835  |
| MMP3     | 14.3365 | 19.0949 | 15.0655 | 14.8041 | 20.9738 | 14.3818 |
| MMS19    | 19.1839 | 19.5578 | 19.3628 | 19.1879 | 19.6006 | 20.4145 |
| MNAT1    | 17.9429 | 18.6415 | 18.6952 | 18.5745 | 19.0306 | 18.031  |
| MOB1B    | 19.0873 | 18.5493 | 18.8672 | 18.4278 | 19.49   | 19.5993 |
| MOB4     | 18.6045 | 17.911  | 18.2058 | 17.5406 | 18.0993 | 18.0069 |
| MOGS     | 21.7195 | 23.2573 | 22.6233 | 22.7421 | 23.5679 | 23.5329 |
| MON2     | 18.3691 | 17.2011 | 17.7019 | 16.3097 | 18.3965 | 16.7233 |
| MOSPD2   | 19.7961 | 19.601  | 18.9793 | 18.6579 | 19.7738 | 19.0024 |
| MOV10    | 20.4347 | 20.822  | 21.1206 | 21.0585 | 21.1836 | 20.9616 |
| MPDU1    | 20.3189 | 20.803  | 20.7114 | 20.9166 | 20.8633 | 20.7287 |
| MPHOSPH8 | 15.2364 | 17.4571 | 16.6255 | 17.0971 | 17.2798 | 15.6281 |
| MPP1     | 18.9029 | 18.3284 | 17.6424 | 18.1262 | 18.0044 | 16.1164 |
| MPP5     | 13.0579 | 17.1642 | 16.9626 | 16.3193 | 16.7236 | 16.1261 |
| MPP6     | 18.3197 | 19.6307 | 21.0216 | 21.0787 | 19.9178 | 20.5719 |
| MPRIP    | 20.8455 | 21.2547 | 20.7399 | 20.4982 | 21.3819 | 20.0862 |
| MPST     | 20.4797 | 20.3804 | 20.6857 | 21.3326 | 19.8465 | 19.4956 |
| MPZ      | 16.6145 | 16.3708 | 16.2349 | 17.7955 | 16.7925 | 16.722  |
| MPZL1    | 20.6541 | 20.4152 | 20.2163 | 20.497  | 20.8676 | 19.4939 |
| MPZL2    | 23.3741 | 20.1902 | 22.7175 | 22.483  | 20.7435 | 23.4093 |
| MRC2     | 22.7458 | 22.8666 | 21.9994 | 22.3748 | 22.2538 | 19.7208 |
| MRE11A   | 21.1066 | 21.1541 | 21.4352 | 21.2197 | 21.3513 | 20.288  |
| MRGPRF   | 17.679  | 19.6874 | 14.7885 | 14.7218 | 18.6541 | 15.9176 |
| MRI1     | 17.8302 | 15.217  | 15.484  | 15.4439 | 16.1748 | 19.6755 |
| MRPL1    | 19.8098 | 19.8651 | 19.7119 | 19.7276 | 20.2319 | 19.851  |
| MRPL10   | 18.3042 | 18.5005 | 20.0451 | 19.8666 | 17.6235 | 19.6757 |
| MRPL11   | 19.2828 | 20.3158 | 19.6122 | 19.8791 | 20.3389 | 19.7148 |



|         |         |         |         |         |         |         |
|---------|---------|---------|---------|---------|---------|---------|
| MRPL13  | 20.1305 | 21.0281 | 20.6656 | 21.0599 | 21.2095 | 20.359  |
| MRPL15  | 19.8995 | 20.6533 | 20.8915 | 21.2372 | 20.8538 | 20.9627 |
| MRPL16  | 16.627  | 17.7609 | 17.1808 | 17.6375 | 17.7991 | 17.7064 |
| MRPL17  | 18.3163 | 19.2973 | 19.634  | 19.8552 | 19.0773 | 18.8247 |
| MRPL19  | 20.713  | 20.9805 | 21.1922 | 21.206  | 20.9974 | 21.247  |
| MRPL21  | 19.6451 | 20.6817 | 20.3014 | 20.6045 | 20.3314 | 20.415  |
| MRPL23  | 18.1473 | 18.8592 | 18.8575 | 19.1321 | 18.4567 | 17.0522 |
| MRPL24  | 20.3025 | 20.4068 | 20.7605 | 20.5964 | 20.2713 | 20.8367 |
| MRPL28  | 18.6007 | 19.8111 | 20.1959 | 20.4287 | 19.1183 | 18.8155 |
| MRPL3   | 18.4216 | 19.2419 | 19.7415 | 19.2981 | 19.4274 | 19.6721 |
| MRPL37  | 21.6284 | 22.2386 | 22.1812 | 22.2094 | 22.3048 | 22.1451 |
| MRPL38  | 20.9532 | 21.4335 | 21.152  | 21.3589 | 21.773  | 21.3735 |
| MRPL39  | 20.2997 | 20.7404 | 21.0887 | 21.2905 | 20.6594 | 20.5733 |
| MRPL4   | 19.3788 | 19.8427 | 19.8647 | 20.1224 | 19.796  | 20.0654 |
| MRPL41  | 18.3275 | 18.8088 | 19.4236 | 19.2761 | 19.2577 | 18.9936 |
| MRPL44  | 18.5376 | 19.2465 | 19.4093 | 19.8732 | 19.2426 | 19.6017 |
| MRPL45  | 21.5855 | 21.691  | 22.2637 | 22.3568 | 21.8386 | 22.0991 |
| MRPL46  | 18.4649 | 18.6012 | 19.8092 | 19.7412 | 18.756  | 18.2646 |
| MRPL47  | 18.3231 | 18.9125 | 19.6384 | 19.3488 | 19.1401 | 18.9764 |
| MRPL48  | 18.2512 | 18.5193 | 19.1958 | 19.6312 | 18.7676 | 18.5214 |
| MRPL49  | 18.9674 | 19.2137 | 19.8532 | 19.8056 | 19.545  | 19.1474 |
| MRPL53  | 18.7364 | 18.5135 | 19.7018 | 19.8204 | 18.4934 | 19.2531 |
| MRPL9   | 17.2896 | 18.3374 | 18.7279 | 18.6937 | 18.5244 | 18.7477 |
| MRPS11  | 14.3319 | 15.174  | 16.5967 | 17.2252 | 13.2862 | 14.6072 |
| MRPS16  | 18.6651 | 19.7022 | 20.0884 | 20.3541 | 19.8034 | 19.8124 |
| MRPS17  | 19.2098 | 19.55   | 19.6159 | 19.8226 | 19.2989 | 19.6994 |
| MRPS18B | 16.4572 | 17.3744 | 18.2275 | 18.1713 | 17.4636 | 17.7818 |
| MRPS2   | 19.6381 | 20.2196 | 20.727  | 20.7731 | 20.5689 | 21.0983 |
| MRPS22  | 21.1257 | 21.4206 | 21.9762 | 22.0663 | 21.3061 | 21.7294 |
| MRPS23  | 20.6038 | 20.8913 | 21.6476 | 21.7397 | 20.9806 | 21.5491 |
| MRPS25  | 18.4131 | 18.3317 | 19.1598 | 19.2858 | 18.4269 | 18.8686 |
| MRPS26  | 17.1519 | 17.297  | 17.4736 | 18.3808 | 17.428  | 18.0445 |
| MRPS27  | 20.9067 | 20.8486 | 22.146  | 22.3927 | 20.7566 | 21.9924 |
| MRPS28  | 18.2831 | 18.6854 | 19.4793 | 19.5602 | 17.7502 | 19.0279 |
| MRPS30  | 19.6953 | 20.3019 | 20.5529 | 20.6929 | 20.0081 | 19.8005 |
| MRPS31  | 17.9814 | 17.7255 | 19.0011 | 19.1288 | 17.7177 | 19.0056 |
| MRPS34  | 18.2124 | 19.3314 | 20.3808 | 20.1266 | 19.5734 | 20.1821 |
| MRPS35  | 20.2231 | 20.203  | 20.9732 | 21.1494 | 20.4302 | 20.4616 |
| MRPS6   | 19.5842 | 19.875  | 20.8417 | 21.1768 | 20.0143 | 20.1091 |
| MRPS7   | 19.1859 | 19.6213 | 20.1806 | 20.4587 | 19.9099 | 20.6552 |
| MRPS9   | 18.3404 | 18.0073 | 17.8133 | 18.6381 | 18.3075 | 18.7879 |
| MRTO4   | 20.1951 | 21.221  | 21.8169 | 21.8476 | 21.4968 | 22.3558 |
| MSH2    | 21.6202 | 21.264  | 21.7951 | 21.5635 | 21.1533 | 21.8178 |
| MSH6    | 21.5679 | 21.0786 | 21.6472 | 21.3082 | 21.2129 | 21.5201 |
| MSN     | 25.7814 | 25.781  | 25.7098 | 25.5548 | 26.4362 | 25.9188 |
| MSTO1   | 17.481  | 17.2356 | 16.2713 | 15.2995 | 18.1513 | 16.0303 |
| MT2A    | 18.6549 | 19.399  | 16.0813 | 15.5575 | 21.0933 | 19.4883 |
| MTA1    | 18.1406 | 19.1352 | 18.8896 | 18.8624 | 18.6012 | 18.8384 |
| MTA2    | 20.2767 | 21.2075 | 21.0979 | 20.9434 | 21.3673 | 21.6358 |
| MTA3    | 17.7372 | 18.0348 | 18.6258 | 18.716  | 18.3408 | 17.4598 |
| MTAP    | 20.9281 | 21.1227 | 21.063  | 20.6582 | 20.9797 | 23.4171 |
| MT-ATP6 | 20.2585 | 20.7577 | 21.0735 | 21.0299 | 20.7148 | 20.1007 |

|         |         |         |         |         |         |         |
|---------|---------|---------|---------|---------|---------|---------|
| MTCH2   | 21.4413 | 21.6398 | 22.4928 | 22.4765 | 21.6737 | 22.0885 |
| MT-CO2  | 20.6542 | 22.2821 | 22.7415 | 23.1086 | 22.4547 | 20.8615 |
| MTDH    | 22.0814 | 21.2322 | 22.9812 | 22.7472 | 21.4738 | 22.5595 |
| MTERF3  | 14.4896 | 14.7207 | 16.0756 | 16.3117 | 13.8453 | 16.3406 |
| MTFP1   | 16.6673 | 17.2036 | 17.498  | 17.9081 | 16.768  | 15.0838 |
| MTR1L   | 17.2375 | 15.9665 | 17.473  | 17.3926 | 14.7966 | 17.425  |
| MTHFD1  | 25.5621 | 23.6522 | 23.3711 | 22.9714 | 24.1964 | 24.6857 |
| MTHFD1L | 21.3815 | 20.9847 | 21.1699 | 21.626  | 21.0668 | 22.5675 |
| MTHFD2  | 21.6064 | 21.1254 | 21.9275 | 21.4355 | 21.9685 | 21.9341 |
| MTOR    | 17.2082 | 18.3274 | 18.1058 | 18.0306 | 18.0987 | 17.5671 |
| MTX1    | 18.9679 | 19.7818 | 20.0814 | 20.4143 | 19.5184 | 18.6641 |
| MTX2    | 18.958  | 19.5257 | 20.3275 | 20.524  | 19.0092 | 19.1369 |
| MUT     | 21.2946 | 21.6562 | 21.2591 | 21.0939 | 21.4993 | 22.076  |
| MVB12A  | 17.3144 | 16.8308 | 15.7608 | 16.0998 | 16.3738 | 18.443  |
| MVP     | 25.9238 | 25.2263 | 24.9559 | 24.5576 | 25.5984 | 23.9259 |
| MX1     | 22.7523 | 20.4485 | 20.2855 | 20.509  | 20.6676 | 21.5061 |
| MX2     | 14.373  | 15.6768 | 16.4589 | 15.9786 | 13.9151 | 12.8081 |
| MYADM   | 21.1725 | 22.252  | 21.6283 | 21.3383 | 22.6393 | 19.9854 |
| MYBBP1A | 17.9249 | 20.3043 | 20.3993 | 20.2849 | 20.3406 | 22.2388 |
| MYDGF   | 23.6919 | 24.1625 | 23.8898 | 23.8012 | 24.0401 | 23.9832 |
| MYH10   | 21.2099 | 20.2458 | 22.2802 | 22.5933 | 20.6239 | 20.2344 |
| MYH9    | 27.7295 | 28.16   | 26.9067 | 26.9219 | 28.7026 | 27.8245 |
| MYL12A  | 23.216  | 23.8968 | 23.1834 | 23.0841 | 24.3018 | 23.6021 |
| MYL6    | 23.9131 | 24.1871 | 23.4291 | 23.2682 | 24.6509 | 24.084  |
| MYLK    | 22.5416 | 22.1203 | 21.2273 | 20.8712 | 22.16   | 21.0382 |
| MYO18A  | 19.3743 | 19.4142 | 20.9782 | 21.1524 | 19.1302 | 20.9042 |
| MYO1B   | 20.3048 | 23.8244 | 20.302  | 20.2521 | 23.8215 | 21.7511 |
| MYO1C   | 24.4161 | 25.1167 | 24.891  | 24.8571 | 25.1535 | 24.6614 |
| MYO1D   | NA      | 15.9721 | 7.23992 | 10.2407 | 15.7429 | 11.0705 |
| MYO1E   | 18.3712 | 18.119  | 18.8051 | 17.8868 | 19.0269 | 19.7513 |
| MYO5A   | 15.3976 | 14.0921 | 16.0226 | 16.0135 | 15.4493 | 16.2906 |
| MYO6    | 19.6381 | 19.0501 | 17.4832 | 17.3865 | 19.5379 | 17.8713 |
| MYOF    | 24.6033 | 25.5365 | 25.2076 | 25.1243 | 25.5625 | 24.9433 |
| NAA10   | 19.7108 | 18.4893 | 19.2392 | 18.9154 | 19.4726 | 20.3562 |
| NAA15   | 21.4024 | 21.0392 | 21.568  | 21.3471 | 21.8249 | 22.3161 |
| NAA35   | 16.3341 | 16.3873 | 15.2029 | 13.7028 | 17.4077 | 16.9116 |
| NAA50   | 20.5894 | 19.7425 | 20.2684 | 19.6962 | 20.5285 | 20.6078 |
| NACA    | 22.7105 | 22.0992 | 22.6937 | 22.2777 | 22.5624 | 23.5333 |
| NACC1   | 17.8719 | 18.0683 | 17.7418 | 17.5351 | 17.1043 | 18.7677 |
| NADK2   | 19.5693 | 20.2026 | 20.1995 | 20.4282 | 20.4112 | 19.0863 |
| NAE1    | 20.2135 | 19.6774 | 19.379  | 18.8515 | 19.0236 | 19.8921 |
| NAGK    | 21.9551 | 20.8176 | 19.4072 | 19.3197 | 21.3675 | 20.4949 |
| NAGLU   | 20.0338 | 21.2874 | 19.9165 | 19.8727 | 20.6477 | 18.3536 |
| NAMPT   | 24.9134 | 26.0638 | 24.8963 | 24.4159 | 27.4491 | 24.4112 |
| NANS    | 22.2165 | 21.4019 | 21.292  | 20.9576 | 21.749  | 21.4787 |
| NAP1L1  | 23.8119 | 23.0961 | 23.5804 | 23.5452 | 23.3794 | 24.3438 |
| NAP1L4  | 23.0337 | 22.4448 | 22.4087 | 22.1583 | 22.8784 | 22.1855 |
| NAPA    | 23.5726 | 23.1404 | 22.9268 | 22.9572 | 23.1831 | 23.3173 |
| NAPG    | 19.6358 | 18.7527 | 19.6718 | 19.0248 | 19.1159 | 19.1397 |
| NARS    | 24.7814 | 23.8737 | 23.7697 | 23.3197 | 24.6856 | 24.2856 |
| NARS2   | 16.185  | 17.2335 | 18.0793 | 17.9957 | 17.429  | 17.0643 |
| NASP    | 21.4607 | 21.2624 | 21.9207 | 21.8931 | 21.0761 | 21.2213 |

|         |         |         |         |         |         |         |
|---------|---------|---------|---------|---------|---------|---------|
| NAT10   | 17.7778 | 20.5693 | 20.8525 | 20.82   | 20.3667 | 20.5708 |
| NBAS    | 18.3523 | 19.1061 | 18.3042 | 18.239  | 19.0802 | 17.3843 |
| NBN     | 17.5376 | 17.1523 | 17.5832 | 18.213  | 17.987  | 17.3043 |
| NCAPD2  | 20.2523 | 19.983  | 20.8238 | 20.6136 | 20.6265 | 21.0567 |
| NCAPG   | 19.9893 | 19.1385 | 19.9031 | 19.4324 | 19.2108 | 20.336  |
| NCAPG2  | 18.6416 | 17.3978 | 19.6093 | 19.4814 | 17.058  | 17.0142 |
| NCAPH   | 19.4938 | 17.8374 | 17.9809 | 18.2582 | 18.1595 | 19.6634 |
| NCAPH2  | 14.455  | 15.0451 | 16.4816 | 16.2573 | 14.3591 | 13.3216 |
| NCBP1   | 21.4269 | 21.9555 | 22.2722 | 22.154  | 21.83   | 21.9416 |
| NCBP2   | 18.6392 | 19.2741 | 19.383  | 19.501  | 18.927  | 18.6211 |
| NCBP3   | 18.1187 | 18.2903 | 19.4607 | 19.4096 | 18.4391 | 19.1309 |
| NCEH1   | 22.8861 | 23.6038 | 23.2392 | 22.7366 | 24.5377 | 22.3675 |
| NCKAP1  | 21.1736 | 20.7654 | 20.2545 | 20.11   | 21.1689 | 21.3149 |
| NCKIPSD | 17.825  | 15.9914 | 17.4516 | 16.6452 | 16.7301 | 18.7493 |
| NCL     | 26.548  | 27.0055 | 27.1907 | 27.142  | 26.8674 | 27.2353 |
| NCLN    | 20.898  | 22.1069 | 22.0102 | 22.1319 | 22.1538 | 21.6412 |
| NCOA5   | 19.8813 | 19.981  | 19.8383 | 20.0766 | 19.4657 | 19.4924 |
| NCOR1   | 18.0095 | 16.3071 | 18.6744 | 18.6835 | 16.7558 | 16.7804 |
| NCSTN   | 21.8278 | 21.9696 | 21.294  | 21.1657 | 21.8532 | 20.7443 |
| NDRG1   | 20.2376 | 18.9317 | 18.1793 | 19.0367 | 18.4945 | 18.8202 |
| NDRG3   | 19.6001 | 19.2513 | 19.8342 | 19.9433 | 19.1533 | 20.3232 |
| NDUFA10 | 20.7245 | 21.1759 | 21.358  | 21.4926 | 20.3841 | 20.5246 |
| NDUFA11 | 20.8539 | 20.9735 | 20.8565 | 21.1505 | 21.1547 | 20.7143 |
| NDUFA12 | 16.8638 | 18.7126 | 18.0774 | 18.7351 | 18.9923 | 15.9868 |
| NDUFA13 | 20.2466 | 20.8324 | 20.9812 | 21.2764 | 20.5377 | 20.0197 |
| NDUFA4  | 20.3428 | 21.2125 | 22.2069 | 21.9545 | 20.7869 | 20.6603 |
| NDUFA5  | 19.344  | 19.4289 | 20.0217 | 19.8161 | 19.5295 | 19.1644 |
| NDUFA6  | 19.9213 | 19.6394 | 20.7864 | 20.7826 | 19.4118 | 18.6333 |
| NDUFA8  | 20.519  | 20.6841 | 21.1795 | 21.4078 | 20.4533 | 20.0796 |
| NDUFA9  | 18.5891 | 19.9235 | 20.3844 | 20.3757 | 19.5262 | 19.7753 |
| NDUFAF2 | 18.4014 | 19.1437 | 20.1486 | 20.4154 | 19.4152 | 18.606  |
| NDUFAF4 | 18.7515 | 19.3655 | 19.3619 | 19.4079 | 19.7598 | 19.7234 |
| NDUFAF7 | 17.5427 | 18.2697 | 19.336  | 19.5344 | 18.3556 | 20.4288 |
| NDUFB1  | 19.5079 | 19.4446 | 19.2415 | 19.409  | 19.6219 | 18.7402 |
| NDUFB10 | 21.3228 | 21.1699 | 21.5892 | 21.914  | 20.9844 | 20.7125 |
| NDUFB11 | 19.3593 | 19.9451 | 20.7993 | 20.7286 | 19.8491 | 19.2152 |
| NDUFB3  | 19.8591 | 19.8757 | 20.2759 | 20.3971 | 20.1664 | 19.6326 |
| NDUFB4  | 18.3561 | 18.6016 | 18.8522 | 19.1945 | 19.1055 | 17.3198 |
| NDUFS1  | 23.361  | 23.1312 | 23.3348 | 23.6359 | 23.3961 | 22.9056 |
| NDUFS2  | 22.1493 | 22.2309 | 22.6113 | 22.6347 | 22.4424 | 22.6168 |
| NDUFS3  | 23.106  | 23.1892 | 23.3418 | 23.5405 | 23.1993 | 23.1706 |
| NDUFS5  | 18.647  | 18.5734 | 18.5371 | 19.0992 | 18.933  | 18.1184 |
| NDUFS8  | 19.6677 | 19.9007 | 20.3258 | 20.5103 | 19.5764 | 19.5296 |
| NDUFV1  | 22.6774 | 22.6746 | 22.7965 | 23.0401 | 22.8728 | 21.82   |
| NDUFV2  | 20.4045 | 20.8318 | 20.8835 | 21.1998 | 20.9863 | 19.3691 |
| NEDD4   | 17.9758 | 17.3446 | 17.8798 | 17.5954 | 17.5792 | 17.8438 |
| NEDD4L  | 15.1321 | 14.0265 | 12.9827 | 13.3066 | 13.8364 | 11.3218 |
| NEDD8   | 19.6122 | 19.4359 | 19.34   | 19.4289 | 19.1141 | 20.3245 |
| NEFL    | 14.6168 | 15.9539 | 12.288  | 13.6372 | 17.6675 | 20.9996 |
| NEK9    | 20.0521 | 17.8253 | 16.6192 | 16.5355 | 18.8081 | 17.5982 |
| NELFA   | 15.9721 | 17.3845 | 16.965  | 16.7802 | 16.6694 | 18.147  |
| NELFCD  | 17.9359 | 18.2213 | 18.1912 | 18.2388 | 17.5378 | 18.5486 |

|           |         |         |         |         |         |         |
|-----------|---------|---------|---------|---------|---------|---------|
| NEO1      | 19.9302 | 17.6131 | 17.8938 | 18.3713 | 16.9185 | 15.563  |
| NES       | 24.5549 | 22.9819 | 22.1434 | 22.4091 | 23.2129 | 26.2534 |
| NEU1      | 20.925  | 21.6829 | 21.857  | 21.9085 | 21.5119 | 21.7092 |
| NF2       | 17.7166 | 18.1092 | 17.7131 | 17.9104 | 17.8031 | 19.0572 |
| NFIC      | 17.839  | 17.4422 | 17.6454 | 17.615  | 16.2674 | 18.1438 |
| NFKB1     | 19.7561 | 20.2947 | 19.0294 | 19.1729 | 20.7062 | 18.6424 |
| NFKB2     | 16.6868 | 18.8682 | 16.7714 | 15.3851 | 19.8426 | 17.1065 |
| NFS1      | 17.2508 | 17.6495 | 17.7747 | 18.0759 | 18.1737 | 17.576  |
| NFYC      | 17.8941 | 17.9121 | 17.7534 | 17.9633 | 17.821  | 17.2354 |
| NIF3L1    | 20.761  | 20.0966 | 20.0028 | 19.9605 | 20.1662 | 20.0626 |
| NIFK      | 18.2834 | 17.825  | 17.7999 | 17.663  | 18.0664 | 19.1951 |
| NIP7      | 19.653  | 20.5352 | 21.3806 | 21.3225 | 20.4093 | 20.7718 |
| NIPSNAP1  | 20.2586 | 20.9211 | 18.7324 | 18.82   | 20.8108 | 20.513  |
| NIPSNAP3A | 20.8339 | 22.1103 | 20.8307 | 21.146  | 21.8729 | 20.8464 |
| NIT1      | 18.881  | 19.1994 | 18.5353 | 19.0607 | 19.2543 | 18.0204 |
| NIT2      | 21.3388 | 20.4748 | 20.5995 | 20.7607 | 20.6772 | 20.5418 |
| NKRF      | 20.1237 | 19.8376 | 20.4588 | 20.3811 | 20.4418 | 21.0541 |
| NLN       | 21.2486 | 20.7737 | 21.5166 | 21.1988 | 20.4983 | 21.5581 |
| NMD3      | 18.0943 | 17.1451 | 19.63   | 18.8157 | 17.8165 | 19.2951 |
| NME1      | 22.8586 | 22.511  | 22.6525 | 22.5224 | 23.1639 | 23.9598 |
| NME1-NME2 | 23.5317 | 23.0163 | 22.545  | 22.7424 | 23.0403 | 23.7191 |
| NME2P1    | 17.3481 | 14.6784 | 17.7802 | 18.1463 | 16.6187 | 19.8328 |
| NMT1      | 22.0749 | 21.9593 | 22.3505 | 22.0283 | 22.5338 | 23.0172 |
| NNMT      | 22.8421 | 22.1891 | 21.8874 | 21.5178 | 22.4253 | 21.1409 |
| NNT       | 23.019  | 21.9541 | 23.3703 | 23.5624 | 22.158  | 22.5593 |
| NOA1      | 17.9725 | 17.4286 | 18.0036 | 17.8818 | 17.8437 | 19.8368 |
| NOC2L     | 20.0792 | 20.0738 | 20.3598 | 20.5386 | 20.3003 | 20.8944 |
| NOC4L     | 18.4887 | 19.3133 | 18.9483 | 18.8436 | 19.5504 | 19.4531 |
| NOL10     | 16.77   | 19.0743 | 18.7217 | 18.6596 | 18.7836 | 19.5383 |
| NOL11     | 19.5816 | 20.3363 | 20.8273 | 20.7125 | 20.6812 | 21.3669 |
| NOL6      | 19.8663 | 20.6031 | 21.2667 | 21.0209 | 19.9588 | 20.6827 |
| NOL9      | 13.9061 | 15.6231 | 16.1244 | 16.2429 | 14.0288 | 16.4355 |
| NOLC1     | 17.4222 | 17.2984 | 20.4326 | 20.4323 | 17.5488 | 20.8322 |
| NOMO1     | 12.7304 | 14.8507 | 15.4905 | 15.2025 | 13.2391 | 11.3581 |
| NOMO3     | 20.2463 | 20.9535 | 21.1962 | 20.861  | 20.5381 | 20.2596 |
| NONO      | 24.0493 | 24.1233 | 24.5326 | 24.7788 | 24.044  | 24.0486 |
| NOP16     | 15.0031 | 15.6174 | 17.5267 | 17.6107 | 15.164  | 16.3914 |
| NOP2      | 16.3684 | 19.7928 | 18.5821 | 18.0486 | 19.537  | 18.4074 |
| NOP56     | 17.3059 | 19.4652 | 19.0323 | 18.9149 | 19.6626 | 20.5557 |
| NOP58     | 18.0938 | 20.3808 | 20.4791 | 20.3194 | 20.4739 | 21.3473 |
| NOSIP     | 19.2696 | 18.463  | 19.9059 | 19.8351 | 18.1992 | 19.7889 |
| NOTCH2    | 13.6673 | 17.0994 | 16.3367 | 16.5541 | 17.1595 | 13.2203 |
| NPC1      | 20.0821 | 20.0423 | 20.5877 | 20.5164 | 20.3285 | 17.8055 |
| NPC2      | 21.7439 | 22.2889 | 20.6823 | 21.2458 | 22.0375 | 21.2266 |
| NPEPPS    | 24.0782 | 23.3826 | 23.6082 | 23.3236 | 23.7577 | 24.2951 |
| NPLOC4    | 22.3588 | 22.326  | 22.8043 | 22.8757 | 22.4215 | 23.3306 |
| NPM1      | 24.8271 | 24.8823 | 26.1825 | 26.7539 | 25.0923 | 26.1445 |
| NPM3      | 17.2496 | 18.1913 | 18.761  | 19.37   | 18.2396 | 18.906  |
| NPTN      | 21.7724 | 22.9008 | 22.1454 | 22.0459 | 22.9508 | 21.5269 |
| NPTX1     | 17.8083 | 13.3567 | 15.5336 | 13.9757 | 12.7157 | 13.6225 |
| NQO1      | 28.091  | 24.325  | 25.6039 | 25.5926 | 24.6323 | 26.4063 |
| NR2C2     | 18.1375 | 17.2747 | 18.2727 | 19.21   | 17.625  | 19.0404 |

|         |         |         |         |         |         |         |
|---------|---------|---------|---------|---------|---------|---------|
| NR2F1   | 14.3008 | 15.3481 | 17.2648 | 17.736  | 14.0649 | 14.6364 |
| NRAS    | 21.6717 | 22.329  | 21.9951 | 22.0939 | 22.3386 | 22.4235 |
| NRBP1   | 20.3491 | 19.4513 | 19.1237 | 19.5026 | 19.1132 | 20.8103 |
| NRCAM   | 12.6685 | NA      | 12.8833 | 14.546  | NA      | 17.4788 |
| NRDC    | 21.517  | 20.8627 | 21.1708 | 20.4051 | 21.5726 | 21.7008 |
| NRP1    | 21.2522 | 22.1108 | 20.1818 | 19.6147 | 22.4267 | 18.9545 |
| NRP2    | 18.9523 | 21.1468 | 18.5714 | 18.6474 | 21.487  | 21.8113 |
| NSA2    | 17.1253 | 18.0834 | 18.9582 | 18.716  | 18.4949 | 19.4968 |
| NSDHL   | 23.0319 | 23.5826 | 23.5646 | 23.5885 | 23.3149 | 23.0789 |
| NSF     | 23.7345 | 24.442  | 23.8934 | 23.7085 | 24.7894 | 24.084  |
| NSFL1C  | 20.6001 | 18.8446 | 20.8975 | 20.7749 | 19.2758 | 20.1616 |
| NSMCE4A | 14.6977 | 13.9895 | 15.7253 | 14.8185 | 13.5107 | 14.8312 |
| NSUN2   | 22.0693 | 22.1163 | 22.384  | 22.0713 | 22.0667 | 22.959  |
| NT5C2   | 20.1288 | 19.0478 | 19.726  | 19.839  | 19.5417 | 20.9878 |
| NT5DC1  | 20.9834 | 19.5746 | 19.1216 | 18.8625 | 19.6344 | 20.2857 |
| NT5DC2  | 21.0337 | 22.4701 | 21.1211 | 21.2656 | 22.8969 | 21.4458 |
| NT5DC3  | 20.7841 | 19.4236 | 19.942  | 19.3764 | 20.0857 | 21.4286 |
| NT5E    | 23.4722 | 26.8543 | 23.3914 | 22.9013 | 27.3804 | 22.564  |
| NTMT1   | 18.243  | 17.4479 | 17.1907 | 17.3718 | 17.8269 | 18.9451 |
| NTPCR   | 20.2939 | 20.0724 | 20.5487 | 20.5428 | 20.1452 | 19.5302 |
| NUBP1   | 20.3496 | 17.9215 | 18.1668 | 18.2822 | 18.3636 | 19.2172 |
| NUBP2   | 19.6988 | 18.7627 | 18.7988 | 18.625  | 18.8039 | 19.3427 |
| NUCB1   | 18.3559 | 17.8717 | 17.8904 | 18.3118 | 17.9198 | 17.6114 |
| NUDC    | 22.6971 | 21.251  | 22.3821 | 21.7338 | 21.9416 | 23.8933 |
| NUDCD1  | 19.5352 | 19.8527 | 20.0181 | 19.4837 | 19.6734 | 20.0087 |
| NUDT16  | 15.9122 | 17.3763 | 16.1108 | 16.2356 | 17.4496 | 15.4033 |
| NUDT19  | 17.4044 | 18.2285 | 19.2677 | 19.5551 | 17.6741 | 17.7311 |
| NUDT21  | 22.7664 | 23.5794 | 23.4705 | 23.5306 | 23.1916 | 22.6549 |
| NUDT5   | 22.8036 | 22.42   | 21.5064 | 21.2898 | 22.7484 | 23.19   |
| NUFIP2  | 20.5294 | 17.5627 | 20.3326 | 19.8083 | 18.0554 | 20.8686 |
| NUMA1   | 23.921  | 24.5031 | 24.639  | 24.7864 | 24.6471 | 23.0528 |
| NUMB    | 17.3719 | 18.1944 | 17.76   | 17.6201 | 18.149  | 16.668  |
| NUP107  | 20.8993 | 20.8914 | 21.5944 | 21.4943 | 20.5423 | 21.106  |
| NUP133  | 21.888  | 22.2804 | 22.3609 | 22.3028 | 22.1899 | 21.3787 |
| NUP153  | 21.1963 | 21.1713 | 21.7852 | 21.7825 | 21.4127 | 21.0396 |
| NUP155  | 22.6085 | 23.3804 | 23.6406 | 23.6871 | 23.2873 | 23.111  |
| NUP160  | 22.2391 | 22.5081 | 22.6127 | 22.4443 | 22.3165 | 22.388  |
| NUP188  | 20.3573 | 19.6653 | 20.2266 | 19.9931 | 19.7686 | 20.142  |
| NUP205  | 21.8145 | 22.5918 | 23.0799 | 22.9786 | 22.8964 | 22.6252 |
| NUP210  | 15.1408 | 14.797  | 15.1303 | 15.9486 | 16.3878 | 20.1049 |
| NUP214  | 21.2234 | 21.5025 | 21.3383 | 21.1452 | 21.1735 | 21.1118 |
| NUP35   | 20.1421 | 19.9254 | 20.5116 | 20.6637 | 20.092  | 20.4769 |
| NUP37   | 19.9489 | 20.31   | 20.851  | 20.5982 | 19.986  | 20.3472 |
| NUP43   | 20.9665 | 21.1147 | 21.2625 | 21.1264 | 20.9805 | 21.3148 |
| NUP50   | 21.2384 | 20.9429 | 21.4928 | 21.8568 | 20.7766 | 21.2817 |
| NUP54   | 21.0432 | 21.1503 | 21.3736 | 21.3032 | 20.8013 | 21.2136 |
| NUP58   | 20.4752 | 20.7137 | 20.6902 | 20.8135 | 21.11   | 21.1321 |
| NUP62   | 19.7854 | 19.534  | 19.9841 | 19.958  | 19.4923 | 19.9974 |
| NUP85   | 20.7942 | 21.0452 | 21.3941 | 21.4693 | 20.8339 | 21.5088 |
| NUP88   | 20.4273 | 21.1157 | 20.9469 | 21.1907 | 21.1317 | 21.0144 |
| NUP93   | 23.4746 | 23.8599 | 23.7703 | 23.764  | 24.0421 | 24.228  |
| NUP98   | 22.0099 | 22.1565 | 22.6132 | 22.6482 | 22.343  | 22.0825 |

|          |         |         |         |         |         |         |
|----------|---------|---------|---------|---------|---------|---------|
| NUTF2    | 20.6788 | 20.4219 | 20.2482 | 20.1358 | 20.7188 | 21.6869 |
| NXF1     | 20.5066 | 21.032  | 20.8976 | 20.8413 | 20.5427 | 21.0172 |
| OAT      | 24.7257 | 24.0554 | 25.4378 | 25.0798 | 24.6377 | 23.998  |
| OBSCN    | 16.3088 | 15.6102 | 17.4875 | 16.8531 | 16.6613 | 16.4679 |
| OCIAD1   | 20.9604 | 20.2113 | 20.4949 | 20.5617 | 20.1054 | 20.4996 |
| OCIAD2   | 18.092  | 19.7433 | 19.6063 | 19.3489 | 20.2919 | 23.4216 |
| OGDH     | 23.8653 | 23.6615 | 23.7296 | 23.6828 | 23.5178 | 23.3566 |
| OGFOD1   | 18.4864 | 17.4708 | 18.9073 | 17.9752 | 16.8883 | 20.055  |
| OGFR     | 20.9106 | 21.755  | 20.7779 | 20.5178 | 21.6988 | 20.9992 |
| OGT      | 19.9336 | 20.6953 | 19.9322 | 19.6822 | 21.1439 | 19.852  |
| OLA1     | 23.4865 | 21.401  | 23.6171 | 23.1212 | 21.8187 | 23.6776 |
| OPA1     | 22.6905 | 22.7276 | 23.3084 | 23.1603 | 22.9826 | 23.634  |
| OPA3     | 17.5689 | 16.756  | 17.1668 | 17.4758 | 15.7522 | 18.034  |
| OPTN     | 17.5728 | 15.9222 | 15.9346 | 15.1397 | 14.2658 | 14.3701 |
| ORC2     | 15.3246 | 16.7319 | 17.6332 | 17.3927 | 16.3769 | 17.3715 |
| ORC3     | 17.2551 | 18.5308 | 18.8271 | 18.9167 | 18.2761 | 18.7802 |
| ORC4     | 15.6127 | 16.7186 | 17.059  | 17.5916 | 16.8302 | 17.8623 |
| OS9      | 20.1149 | 23.2809 | 19.7843 | 20.6058 | 24.1593 | 20.5697 |
| OSBP     | 20.8744 | 20.6409 | 20.6682 | 20.1452 | 21.0298 | 20.4436 |
| OSBPL10  | 16.5743 | 14.14   | 15.6414 | 14.7002 | 14.2446 | 19.3478 |
| OSBPL11  | 13.7493 | 15.7614 | 14.2678 | 14.3418 | 13.6313 | 11.0084 |
| OSBPL1A  | 19.6266 | 20.3134 | 18.4323 | 18.732  | 19.4864 | 15.0719 |
| OSBPL8   | 19.5244 | 20.1239 | 19.3945 | 19.3627 | 20.0811 | 18.7818 |
| OSBPL9   | 19.2907 | 19.2766 | 19.2639 | 18.9646 | 19.2236 | 19.5124 |
| OSGEP    | 17.917  | 17.1195 | 15.5244 | 14.9801 | 17.3091 | 16.4316 |
| OSMR     | 15.2293 | 14.2417 | 17.4108 | 17.1211 | 15.0198 | 14.1048 |
| OSTC     | 20.411  | 21.7344 | 21.2893 | 21.4844 | 21.7053 | 19.751  |
| OTUB1    | 23.0007 | 22.1195 | 21.7304 | 21.5066 | 22.5775 | 23.1878 |
| OVCA2    | 19.834  | 19.1482 | 20.0359 | 19.9893 | 19.7923 | 20.3305 |
| OXA1L    | 16.8356 | 17.8924 | 18.3271 | 18.3642 | 18.2334 | 18.515  |
| OXCT1    | 21.5043 | 21.0185 | 20.46   | 21.0371 | 21.1148 | 20.3985 |
| OXSRI    | 20.6031 | 21.2102 | 20.0866 | 19.5227 | 21.7614 | 21.8736 |
| P3H1     | 23.207  | 24.125  | 24.0407 | 24.202  | 23.7396 | 22.4189 |
| P3H2     | 19.7104 | 21.9712 | 23.0255 | 23.3691 | 21.1886 | 21.091  |
| P3H3     | 19.7845 | 21.9224 | 21.1255 | 21.0755 | 21.8778 | 20.3199 |
| P3H4     | 18.7568 | 20.7289 | 20.9815 | 21.0796 | 20.4214 | 19.0261 |
| P4HA1    | 24.9664 | 25.4203 | 24.9437 | 25.1402 | 24.7514 | 24.8617 |
| P4HA2    | 24.4186 | 26.4382 | 24.5077 | 24.8352 | 25.9836 | 24.3348 |
| P4HB     | 27.7655 | 28.157  | 27.7345 | 27.8794 | 27.9512 | 27.2666 |
| PA2G4    | 25.0481 | 23.9513 | 24.5776 | 24.4667 | 24.4176 | 25.6229 |
| PAAF1    | 19.3453 | 16.6278 | 19.7944 | 19.3804 | 16.9343 | 19.4472 |
| PABPC1   | 25.5219 | 25.2851 | 25.2825 | 25.1591 | 25.5351 | 26.0711 |
| PABPC4   | 22.6996 | 22.6984 | 22.274  | 22.3674 | 22.876  | 23.325  |
| PABPN1   | 22.2736 | 22.5571 | 22.3697 | 22.4675 | 21.7923 | 21.9649 |
| PACSIN2  | 22.6194 | 21.3711 | 21.7769 | 21.5    | 21.7646 | 21.7486 |
| PACSIN3  | 17.055  | 17.3053 | 19.2743 | 19.2435 | 17.2736 | 18.64   |
| PAF1     | 20.716  | 20.9834 | 21.8338 | 21.6756 | 21.1137 | 21.4466 |
| PAFAH1B1 | 22.2291 | 20.9515 | 20.5201 | 20.1898 | 21.7757 | 22.1774 |
| PAFAH1B2 | 21.5382 | 20.5021 | 20.437  | 20.1153 | 21.492  | 20.8874 |
| PAICS    | 25.199  | 24.2869 | 24.583  | 24.311  | 24.6462 | 27.3824 |
| PAIP1    | 20.7811 | 19.3143 | 20.0524 | 19.9296 | 19.5544 | 21.1538 |
| PAK1IP1  | 14.3474 | 18.0747 | 17.7881 | 17.3963 | 17.0887 | 19.0696 |

|         |         |         |         |         |         |         |
|---------|---------|---------|---------|---------|---------|---------|
| PAK2    | 22.7228 | 21.7374 | 21.8629 | 21.4089 | 22.6268 | 23.387  |
| PALLD   | 23.2431 | 21.4956 | 20.5498 | 20.5415 | 22.2499 | 22.3027 |
| PAPOLA  | 18.1675 | 18.4003 | 17.2255 | 16.0248 | 19.015  | 18.5529 |
| PAPSS1  | 20.5986 | 21.0833 | 19.8589 | 19.5868 | 21.0352 | 19.7412 |
| PAPSS2  | 21.0397 | 22.4558 | 21.4233 | 20.8104 | 23.1427 | 19.7532 |
| PARK7   | 25.1817 | 24.1749 | 23.647  | 23.7738 | 24.4695 | 25.2546 |
| PARN    | 18.9241 | 18.8085 | 19.3214 | 19.5656 | 18.83   | 18.7211 |
| PARP1   | 22.7055 | 23.7914 | 23.7088 | 23.818  | 23.4092 | 24.1805 |
| PARP14  | 19.2222 | 18.3469 | 18.0398 | 17.7446 | 17.5097 | 17.9763 |
| PARP4   | 18.108  | 16.722  | 17.6913 | 17.0649 | 17.5768 | 16.7271 |
| PARP9   | 18.2379 | 17.0118 | 16.3446 | 15.6135 | 14.9858 | 17.9489 |
| PARVA   | 21.2181 | 21.3802 | 20.1227 | 19.7319 | 21.8269 | 20.1055 |
| PAWR    | 10.7678 | 11.8249 | 13.3876 | 13.2827 | 7.19606 | 13.457  |
| PBDC1   | 19.3591 | 18.5312 | 18.6673 | 17.636  | 19.5827 | 20.3016 |
| PBK     | 21.3015 | 20.2104 | 20.0649 | 20.3337 | 20.4529 | 20.9066 |
| PBRM1   | 15.3626 | 17.9135 | 17.734  | 17.807  | 17.6983 | 14.9841 |
| PBXIP1  | 17.8198 | 18.7887 | 19.7186 | 19.8449 | 18.6103 | 19.0742 |
| PC      | 23.739  | 23.1663 | 23.5175 | 23.5187 | 23.0439 | 21.8429 |
| PCBP1   | 24.4842 | 23.9767 | 23.8662 | 23.895  | 24.1866 | 25.1401 |
| PCBP2   | 24.0945 | 23.7545 | 24.1797 | 24.0278 | 23.83   | 24.5717 |
| PCCB    | 18.0356 | 18.159  | 18.6067 | 19.0094 | 18.0187 | 17.4639 |
| PCK2    | 21.211  | 19.333  | 20.6026 | 20.5874 | 20.4034 | 20.53   |
| PCMT1   | 21.0227 | 20.2932 | 20.3784 | 20.2992 | 20.5624 | 21.3636 |
| PCNA    | 25.0503 | 24.3395 | 24.4162 | 24.618  | 24.4278 | 24.8066 |
| PCOLCE  | 18.4239 | 18.2761 | 15.393  | 16.9049 | 16.0198 | 14.4273 |
| PCYOX1  | 23.0265 | 22.8798 | 22.659  | 22.711  | 22.6082 | 22.2973 |
| PCYT1A  | 21.435  | 21.2911 | 21.1421 | 21.1044 | 21.5619 | 22.1039 |
| PDAP1   | 18.187  | 14.4965 | 16.2934 | 16.0841 | 15.7287 | 18.661  |
| PDCD11  | 12.2833 | 17.8454 | 17.0469 | 16.6194 | 16.9568 | 18.0654 |
| PDCD4   | 16.3119 | 19.1228 | 18.5415 | 17.9867 | 20.5428 | 17.9361 |
| PDCD6   | 22.076  | 21.425  | 21.9155 | 21.8016 | 21.6442 | 22.5006 |
| PDCD6IP | 24.3524 | 24.1605 | 23.5877 | 23.0951 | 24.7892 | 24.773  |
| PDCL3   | 18.0894 | 17.0044 | 17.8725 | 17.6846 | 17.3741 | 19.9735 |
| PDE12   | 20.0986 | 19.9468 | 19.9212 | 19.9081 | 20.158  | 22.1901 |
| PDE1C   | 14.8444 | 15.0811 | 15.7246 | 15.7614 | 14.8284 | 20.9465 |
| PDE5A   | 22.182  | 17.5501 | 21.1239 | 21.19   | 17.276  | 17.359  |
| PDF     | 20.2154 | 18.3493 | 19.3735 | 19.7346 | 18.9406 | 19.7742 |
| PDGFRA  | 17.1345 | 17.9082 | 9.96694 | NA      | 15.3881 | 12.94   |
| PDGFRB  | 21.8936 | 22.0369 | 22.1766 | 22.1781 | 21.5441 | 20.3516 |
| PDHA1   | 21.4374 | 20.3252 | 21.7948 | 22.0192 | 20.6221 | 21.6192 |
| PDHB    | 23.0579 | 22.7917 | 23.3833 | 23.6273 | 23.1219 | 23.5237 |
| PDHX    | 20.8873 | 20.6811 | 21.338  | 21.1711 | 20.6516 | 21.2654 |
| PDIA3   | 27.7569 | 27.6483 | 27.6183 | 27.8777 | 27.5979 | 26.8101 |
| PDIA4   | 27.6851 | 27.0797 | 27.3972 | 27.4318 | 27.3212 | 26.7691 |
| PDIA5   | 20.3083 | 22.6459 | 20.2255 | 20.4475 | 22.5826 | 21.0899 |
| PDIA6   | 26.8244 | 27.1391 | 26.7421 | 26.9764 | 26.6919 | 26.5944 |
| PDK1    | 18.5017 | 18.3535 | 18.8798 | 19.2739 | 18.2987 | 19.4914 |
| PDK3    | 17.1413 | 11.4544 | 16.4853 | 16.4274 | 10.6609 | 14.211  |
| PDLIM1  | 24.7626 | 23.6716 | 21.5029 | 21.0665 | 23.9938 | 22.7386 |
| PDLIM4  | 19.9402 | 22.0049 | 20.0794 | 19.9704 | 22.4336 | 22.6466 |
| PDLIM5  | 21.9763 | 20.5122 | 18.729  | 18.1859 | 21.5953 | 21.9921 |
| PDLIM7  | 22.8266 | 23.4476 | 22.5114 | 22.4485 | 23.8557 | 23.234  |

|        |         |         |         |         |         |         |
|--------|---------|---------|---------|---------|---------|---------|
| PDP1   | 19.4003 | 19.2316 | 19.7151 | 19.4876 | 19.108  | 20.555  |
| P DPR  | 22.4611 | 22.2277 | 22.7956 | 22.7664 | 22.7    | 23.1816 |
| PDS5A  | 18.7395 | 20.6255 | 20.2285 | 20.4338 | 20.8524 | 20.3273 |
| PDS5B  | 16.0489 | 18.1772 | 17.8785 | 18.1026 | 18.6292 | 17.7818 |
| PDXDC1 | 20.3134 | 18.3281 | 19.1315 | 18.6847 | 19.1589 | 18.3988 |
| PDXK   | 19.9006 | 19.2302 | 19.3177 | 19.1433 | 18.3458 | 18.6161 |
| PEA15  | 17.3193 | 15.7562 | 14.522  | 14.6918 | 16.2407 | 17.3626 |
| PEBP1  | 24.27   | 22.782  | 22.2106 | 22.3922 | 23.0879 | 23.8848 |
| PEF1   | 19.8202 | 20.0425 | 19.9556 | 19.6355 | 20.2751 | 19.9483 |
| PEG10  | 15.0523 | 14.6512 | 14.2859 | 14.8107 | 13.1191 | 18.4255 |
| PELO   | 19.0493 | 19.1842 | 19.3217 | 18.9567 | 19.7671 | 19.3387 |
| PELP1  | 20.4124 | 21.7017 | 21.7472 | 21.6673 | 21.6611 | 20.9923 |
| PEPD   | 22.6798 | 21.4664 | 20.467  | 20.2403 | 21.6385 | 22.078  |
| PES1   | 19.1991 | 19.701  | 20.0654 | 19.6439 | 19.6665 | 20.7417 |
| PFAS   | 21.3676 | 21.2233 | 21.2411 | 20.8667 | 21.4817 | 22.3012 |
| PFDN2  | 18.9825 | 18.3734 | 18.9933 | 18.3218 | 19.0529 | 19.9355 |
| PFDN5  | 19.0427 | 18.2397 | 18.9654 | 18.5137 | 18.1757 | 19.1965 |
| PFKFB3 | 9.96497 | 12.5194 | 11.5018 | 11.1611 | 12.7116 | 17.1464 |
| PFKL   | 23.869  | 21.9513 | 22.9746 | 22.791  | 22.3007 | 22.6656 |
| PFKM   | 21.5051 | 20.0119 | 20.8623 | 20.2498 | 20.7254 | 21.0764 |
| PFKP   | 24.9102 | 23.4874 | 23.7931 | 23.4683 | 24.1507 | 24.8602 |
| PFN1   | 27.2772 | 27.1038 | 26.3428 | 26.2712 | 27.4658 | 28.0076 |
| PFN2   | 21.0902 | 20.0845 | 21.0583 | 21.1922 | 20.7959 | 21.5694 |
| PGAM1  | 26.4893 | 25.26   | 25.2966 | 25.4577 | 25.3497 | 26.9596 |
| PGAM5  | 19.1606 | 18.9465 | 19.5863 | 20.2692 | 19.4108 | 20.1524 |
| PGD    | 24.6131 | 23.395  | 25.3982 | 25.3056 | 23.9612 | 25.7928 |
| PGK1   | 28.3084 | 26.5921 | 26.5046 | 26.5044 | 26.7855 | 28.8707 |
| PGLS   | 23.8253 | 23.1487 | 21.9647 | 21.8911 | 23.2916 | 22.5929 |
| PGM1   | 23.4676 | 22.1178 | 22.4597 | 22.2725 | 22.5696 | 22.9954 |
| PGM2   | 20.5512 | 20.1443 | 19.8036 | 19.254  | 20.7911 | 21.8884 |
| PGM2L1 | 19.9503 | 17.6045 | 14.8375 | 14.2772 | 18.8122 | 20.9259 |
| PGM3   | 18.9376 | 18.5263 | 16.3308 | 15.2754 | 19.5959 | 18.5759 |
| PGM5   | 18.8244 | 14.7611 | 16.931  | 15.6871 | 15.0092 | 13.3283 |
| PGP    | 21.1139 | 22.6216 | 20.993  | 20.9652 | 22.34   | 20.487  |
| PGRMC1 | 20.5249 | 22.27   | 22.3704 | 22.3203 | 22.5895 | 22.5713 |
| PGRMC2 | 22.6176 | 22.9613 | 22.4787 | 22.5509 | 23.0216 | 22.3763 |
| PHB    | 25.3843 | 26.0835 | 26.2622 | 26.4485 | 25.9162 | 26.0781 |
| PHB2   | 24.9397 | 25.5917 | 25.7682 | 26.0775 | 25.2364 | 25.6846 |
| PHC2   | 18.7869 | 17.0618 | 19.0043 | 18.9598 | 16.143  | 18.4571 |
| PHF14  | 16.331  | 16.7459 | 18.0849 | 18.1522 | 16.6266 | 15.4652 |
| PHF5A  | 20.9039 | 20.9474 | 20.3118 | 20.84   | 21.0334 | 20.3732 |
| PHGDH  | 25.4122 | 23.2044 | 24.7315 | 24.2704 | 24.5259 | 26.0916 |
| PHLDA1 | 18.5418 | 18.5463 | 19.2891 | 19.1399 | 18.8806 | 17.7127 |
| PI4K2A | 18.1975 | 19.4347 | 19.9614 | 20.2132 | 18.8744 | 18.7422 |
| PI4KA  | 14.5894 | 16.5584 | 16.5027 | 15.6679 | 15.9306 | 13.3274 |
| PICALM | 21.5481 | 22.2328 | 21.5869 | 21.7102 | 22.2481 | 21.3285 |
| PIGK   | 18.2555 | 19.1418 | 19.6456 | 19.4886 | 18.9722 | 17.274  |
| PIGS   | 19.3463 | 20.4961 | 20.9034 | 20.9626 | 20.31   | 20.2393 |
| PIGT   | 21.5741 | 21.6573 | 21.9945 | 21.922  | 21.8372 | 21.9077 |
| PIGU   | 16.7132 | 17.6087 | 18.6156 | 18.9727 | 17.3908 | 17.2272 |
| PIK3R4 | 15.2461 | 17.3584 | 17.3124 | 16.9144 | 17.797  | 16.7805 |
| PIN1   | 18.4738 | 15.6864 | 17.4806 | 17.2841 | 16.6413 | 19.4756 |



|         |         |         |         |         |         |         |
|---------|---------|---------|---------|---------|---------|---------|
| PIP4K2A | 18.8881 | 18.409  | 18.491  | 18.5782 | 18.2821 | 19.0377 |
| PIP4K2C | 20.9504 | 25.559  | 20.8615 | 20.7399 | 25.9355 | 21.4203 |
| PIR     | 21.5662 | 17.2039 | 20.5299 | 20.5705 | 17.2371 | 20.0738 |
| PITPNB  | 22.5688 | 21.7413 | 21.5953 | 21.1368 | 22.2737 | 22.4325 |
| PITRM1  | 21.4363 | 22.3684 | 21.8918 | 21.9355 | 22.6987 | 21.777  |
| PKM     | 30.9736 | 28.9994 | 29.4072 | 29.104  | 29.3672 | 30.6017 |
| PKMYT1  | 16.2654 | 10.8331 | 15.9328 | 16.0809 | NA      | 9.78379 |
| PKN1    | 16.9041 | 15.1554 | 16.9022 | 16.0113 | 15.4043 | 17.0037 |
| PKN2    | 20.6542 | 19.9459 | 20.6625 | 20.3646 | 20.2967 | 21.0223 |
| PLA2G15 | 18.7251 | 19.5567 | 19.9635 | 20.6058 | 19.6718 | 20.6479 |
| PLA2G4A | 20.9009 | 18.0375 | 18.7151 | 18.8087 | 18.698  | 18.36   |
| PLAA    | 19.1196 | 19.8135 | 20.3738 | 20.17   | 20.2746 | 22.3608 |
| PLAT    | 11.9063 | 12.6452 | 14.6418 | 15.3539 | 10.3846 | 16.9843 |
| PLAU    | 17.61   | 16.7042 | 17.9879 | 16.7923 | 17.0658 | 16.9719 |
| PLBD2   | 22.4776 | 22.6563 | 21.7927 | 22.2036 | 22.3672 | 21.1689 |
| PLCB4   | 12.8127 | 15.8289 | 13.4812 | 14.3891 | 15.3694 | 12.6888 |
| PLCG1   | 20.1522 | 19.0463 | 20.2314 | 20.1064 | 19.1944 | 20.2697 |
| PLD3    | 21.3129 | 22.2651 | 21.8148 | 21.8104 | 21.5991 | 20.4722 |
| PLEC    | 28.4369 | 27.6642 | 28.3374 | 28.5718 | 27.7218 | 26.9911 |
| PLIN3   | 23.8414 | 24.3247 | 22.9872 | 22.8892 | 24.7581 | 24.2119 |
| PLOD1   | 23.2057 | 24.8865 | 23.9628 | 24.2505 | 24.1992 | 24.539  |
| PLOD2   | 24.4848 | 25.806  | 25.7457 | 25.6216 | 25.448  | 24.9144 |
| PLOD3   | 24.0339 | 24.7578 | 24.1831 | 24.3603 | 24.3441 | 24.6058 |
| PLP2    | 21.5443 | 20.6464 | 21.7346 | 21.7324 | 21.1387 | 20.4266 |
| PLPP1   | 22.4766 | 19.2206 | 20.9793 | 21.3106 | 18.8114 | 19.5531 |
| PLPP2   | 17.7785 | 20.1521 | 19.1558 | 18.9486 | 19.9207 | 19.5569 |
| PLPP3   | 19.1832 | 20.3135 | 18.4953 | 17.3384 | 20.8747 | 17.7781 |
| PLRG1   | 21.0801 | 21.3395 | 21.1311 | 20.9191 | 21.2167 | 21.3291 |
| PLS3    | 24.8553 | 24.2953 | 23.7435 | 23.4612 | 25.0803 | 25.0787 |
| PLSCR1  | 19.0563 | 19.4878 | 18.3895 | 18.6193 | 17.9221 | 17.9069 |
| PLXNB2  | 20.9968 | 21.5452 | 21.0794 | 21.4868 | 20.7777 | 20.1202 |
| PML     | 22.3681 | 23.3372 | 22.7845 | 22.7976 | 23.0538 | 21.8059 |
| PMPCA   | 21.029  | 21.5217 | 21.7055 | 22.0971 | 21.1578 | 22.185  |
| PMPCB   | 21.7237 | 22.4518 | 22.6894 | 23.0014 | 22.0434 | 22.9737 |
| PMVK    | 17.9682 | 15.9512 | 16.468  | 16.1636 | 15.3543 | 17.5594 |
| PNKP    | 18.4426 | 19.27   | 16.9092 | 17.691  | 18.1914 | 18.6037 |
| PNN     | 21.5266 | 21.5173 | 21.8691 | 21.9392 | 21.7661 | 21.8033 |
| PNO1    | 15.2274 | 17.4572 | 18.1298 | 17.8379 | 16.8097 | 18.4374 |
| PNP     | 21.4121 | 21.3759 | 19.9034 | 19.3174 | 22.4774 | 21.6549 |
| PNPLA6  | 17.3473 | 19.6646 | 17.4615 | 17.5057 | 19.2375 | 17.4276 |
| PNPO    | 13.6932 | 15.1136 | 16.3165 | 16.1903 | 13.0383 | 13.9613 |
| PNPT1   | 22.2106 | 22.3824 | 23.1817 | 23.0762 | 22.5886 | 23.3704 |
| PODXL   | 15.3381 | 19.8258 | 16.1374 | 15.7676 | 21.765  | 18.1882 |
| POFUT1  | 22.7272 | 22.2624 | 22.4329 | 22.8005 | 21.9587 | 21.5846 |
| POFUT2  | 20.8492 | 20.8641 | 21.6219 | 21.8895 | 20.4092 | 20.7874 |
| POGZ    | 16.4665 | 18.1695 | 17.3342 | 17.5986 | 18.2266 | 16.5486 |
| POLA2   | 18.3899 | 17.1867 | 18.6052 | 18.5816 | 17.2888 | 17.9059 |
| POLD1   | 18.3664 | 19.6569 | 19.8835 | 19.7851 | 19.5743 | 19.5497 |
| POLD2   | 19.1944 | 19.3881 | 19.3252 | 19.5843 | 19.147  | 18.7414 |
| POLDIP2 | 21.0455 | 21.2338 | 21.809  | 22.0609 | 21.2501 | 21.9165 |
| POLDIP3 | 19.3902 | 18.9975 | 19.7194 | 19.7089 | 19.0664 | 20.4389 |
| POLR1A  | 18.1844 | 21.1069 | 20.1784 | 20.1614 | 21.7405 | 20.257  |

|          |         |         |         |         |         |         |
|----------|---------|---------|---------|---------|---------|---------|
| POLR1B   | 15.8175 | 16.625  | 17.9283 | 17.7278 | 14.9755 | 18.1246 |
| POLR1C   | 19.9809 | 20.4553 | 20.8058 | 20.8811 | 19.9466 | 21.0885 |
| POLR2A   | 20.7463 | 21.2758 | 21.1087 | 21.167  | 21.9051 | 21.3017 |
| POLR2B   | 19.7632 | 20.5208 | 20.6831 | 20.7174 | 20.8547 | 21.8541 |
| POLR2C   | 18.6679 | 18.8616 | 18.7058 | 19.0461 | 18.202  | 19.1324 |
| POLR2E   | 17.4684 | 18.5378 | 18.0591 | 19.0075 | 18.5571 | 17.9357 |
| POLR2G   | 18.4295 | 18.0779 | 18.5168 | 18.6757 | 18.7595 | 18.8708 |
| POLR2H   | 19.1606 | 19.3131 | 18.5179 | 18.8709 | 19.2869 | 19.9461 |
| POLRMT   | 15.6889 | 15.8924 | 17.0366 | 16.9401 | 16.7953 | 18.8171 |
| PON2     | 22.0122 | 22.4463 | 22.8425 | 23.0348 | 22.2483 | 21.7198 |
| POR      | 24.2469 | 23.1077 | 24.1517 | 24.2267 | 23.1304 | 23.7476 |
| PPA1     | 23.4756 | 21.344  | 22.5467 | 22.0758 | 21.6295 | 24.2463 |
| PPA2     | 22.2559 | 22.3959 | 21.7951 | 21.9469 | 22.4215 | 21.5636 |
| PPAT     | 20.3417 | 18.8104 | 19.3003 | 18.6182 | 19.6173 | 22.6073 |
| PPFIBP1  | 19.5781 | 19.6865 | 19.4831 | 19.022  | 20.1731 | 19.0167 |
| PPHLN1   | 16.074  | 16.5332 | 16.1679 | 16.6399 | 16.495  | 16.8313 |
| PPIA     | 27.9586 | 27.751  | 27.4481 | 27.5609 | 27.7788 | 27.7517 |
| PPIB     | 26.5582 | 27.3375 | 26.975  | 27.2593 | 27.2338 | 26.6394 |
| PPIC     | 21.988  | 22.3724 | 21.8207 | 21.9127 | 21.8335 | 21.2836 |
| PPID     | 20.0397 | 19.4731 | 20.4623 | 19.9748 | 19.5887 | 20.9851 |
| PPIE     | 19.9847 | 20.684  | 20.3013 | 20.7779 | 20.4554 | 20.2469 |
| PPIF     | 22.7654 | 24.7513 | 24.0419 | 24.4835 | 24.7309 | 24.1929 |
| PPIG     | 18.6825 | 19.524  | 20.8916 | 19.3194 | 18.9408 | 18.2214 |
| PPIH     | 19.814  | 18.9631 | 20.1222 | 20.3737 | 18.9788 | 20.7054 |
| PPM1A    | 19.289  | 17.5332 | 15.097  | 13.8369 | 18.0118 | 17.8158 |
| PPM1F    | 21.1508 | 20.1888 | 19.5407 | 19.5055 | 20.3079 | 20.5212 |
| PPM1G    | 22.0403 | 21.1093 | 21.1854 | 21.0546 | 21.267  | 22.9419 |
| PPME1    | 19.3445 | 18.7208 | 18.91   | 19.2682 | 17.9179 | 19.3717 |
| PPOX     | 18.2552 | 19.4899 | 18.4671 | 18.471  | 19.3705 | 18.649  |
| PPP1CB   | 21.7354 | 21.7179 | 21.7485 | 21.548  | 21.8628 | 22.3903 |
| PPP1R10  | 20.144  | 19.2167 | 19.5449 | 19.5447 | 19.7002 | 19.7101 |
| PPP1R12A | 19.284  | 18.5707 | 19.1236 | 19.1715 | 19.0284 | 18.1273 |
| PPP1R18  | 18.7193 | 18.8697 | 18.7309 | 19.0189 | 18.4003 | 18.4933 |
| PPP1R7   | 21.5178 | 20.1943 | 19.6986 | 19.6013 | 20.3747 | 20.8566 |
| PPP1R8   | 20.2027 | 19.6538 | 19.9638 | 19.7072 | 19.245  | 19.8356 |
| PPP2CA   | 22.3698 | 21.3934 | 21.3316 | 21.4238 | 21.7631 | 22.3701 |
| PPP2R1A  | 24.238  | 23.1762 | 23.0081 | 22.9821 | 23.3427 | 24.0893 |
| PPP2R1B  | 19.9194 | 19.893  | 19.3532 | 19.12   | 20.5005 | 19.7494 |
| PPP2R2A  | 21.618  | 20.4524 | 20.1701 | 20.0782 | 21.0258 | 21.5317 |
| PPP2R4   | 21.2848 | 19.5917 | 19.424  | 19.4439 | 19.9834 | 21.6073 |
| PPP2R5C  | 16.9895 | 17.5375 | 16.432  | 16.3495 | 17.1264 | 17.4257 |
| PPP2R5E  | 19.2406 | 18.8795 | 18.3505 | 18.0705 | 19.0502 | 19.7099 |
| PPP3CA   | 20.5816 | 20.1636 | 19.7848 | 19.65   | 20.4079 | 19.8552 |
| PPP4C    | 21.7177 | 21.3789 | 21.2939 | 21.2324 | 21.2139 | 21.3273 |
| PPP4R1   | 18.5125 | 18.2815 | 17.6726 | 17.3071 | 18.0106 | 18.4916 |
| PPP4R3A  | 18.9835 | 19.5401 | 19.5024 | 19.8507 | 18.6687 | 19.3513 |
| PPP4R3B  | 17.456  | 17.3455 | 18.1049 | 17.365  | 17.5403 | 17.3885 |
| PPP5C    | 21.5005 | 20.0758 | 20.0951 | 20.0378 | 20.5826 | 21.6404 |
| PPP6C    | 19.6753 | 19.6084 | 19.7374 | 19.6297 | 19.4769 | 19.51   |
| PPP6R3   | 18.0416 | 17.2817 | 18.6062 | 18.1622 | 17.4463 | 18.316  |
| PPT1     | 21.3801 | 21.7092 | 21.1919 | 21.7816 | 21.5948 | 22.0783 |
| PPT2     | 18.0803 | 19.7549 | 19.2713 | 19.6856 | 19.3949 | 19.331  |

|         |         |         |         |         |         |         |
|---------|---------|---------|---------|---------|---------|---------|
| PPWD1   | 18.5859 | 19.4169 | 19.3052 | 19.6588 | 18.9527 | 19.0661 |
| PRC1    | 15.5557 | 14.1518 | 15.8454 | 16.0122 | 13.0746 | 14.1002 |
| PRCP    | 21.1211 | 21.0339 | 21.0362 | 21.5579 | 20.6045 | 19.8555 |
| PRDX1   | 27.9187 | 25.8357 | 27.6489 | 27.5524 | 26.3223 | 28.7601 |
| PRDX2   | 24.2056 | 22.2442 | 21.8667 | 21.8913 | 22.4348 | 24.4269 |
| PRDX3   | 24.6736 | 24.4115 | 25.0976 | 25.1217 | 24.6861 | 24.8264 |
| PRDX4   | 24.9772 | 23.5964 | 24.5816 | 24.5512 | 23.3236 | 24.108  |
| PRDX5   | 24.2683 | 24.4215 | 23.7119 | 23.6735 | 24.681  | 23.422  |
| PRDX6   | 25.4264 | 24.6298 | 24.8369 | 24.4586 | 25.0471 | 25.2888 |
| PREB    | 16.6554 | 16.6331 | 16.8776 | 17.8852 | 16.4993 | 16.6966 |
| PREP    | 22.0452 | 20.8155 | 20.0788 | 19.7954 | 20.9412 | 22.9378 |
| PRIM1   | 18.1766 | 17.2924 | 18.3137 | 18.2515 | 17.9431 | 19.089  |
| PRKAA1  | 19.6893 | 19.1666 | 19.0666 | 18.7421 | 20.1387 | 20.4813 |
| PRKACA  | 20.568  | 20.8851 | 20.7942 | 20.3609 | 20.9525 | 21.7732 |
| PRKACB  | 18.9995 | 18.6363 | 18.7189 | 18.7657 | 19.2361 | 18.9318 |
| PRKAG1  | 19.5837 | 18.753  | 18.6691 | 18.2851 | 18.5813 | 19.6007 |
| PRKAR1A | 23.8569 | 22.7748 | 23.2727 | 23.0293 | 22.9513 | 23.2798 |
| PRKAR2A | 21.2669 | 21.6197 | 20.4757 | 20.5505 | 21.883  | 22.5024 |
| PRKCA   | 18.7794 | 19.3194 | 17.9187 | 18.8793 | 18.4425 | 18.9014 |
| PRKCD   | 14.949  | 17.2322 | 17.0562 | 16.7858 | 17.2042 | 14.1089 |
| PRKcdbp | 19.1725 | 21.3888 | 19.3194 | 19.0531 | 21.9696 | 17.7199 |
| PRKCI   | 17.4245 | 16.979  | 18.064  | 17.4429 | 17.9494 | 17.9637 |
| PRKCSH  | 25.6838 | 25.158  | 25.2148 | 25.2924 | 25.364  | 25.6981 |
| PRKDC   | 24.1029 | 24.5719 | 24.9888 | 25.369  | 24.5386 | 24.4779 |
| PRKRA   | 21.1593 | 20.387  | 21.3517 | 21.1604 | 20.2574 | 19.9936 |
| PRMT1   | 24.5337 | 24.9886 | 24.6981 | 24.6382 | 24.7669 | 25.5729 |
| PRMT3   | 17.6059 | 15.4087 | 16.5766 | 16.6028 | 15.361  | 17.5224 |
| PRMT5   | 22.6503 | 22.3663 | 22.0625 | 22.0795 | 22.9355 | 23.4914 |
| PROCR   | 21.1425 | 20.7486 | 21.2624 | 21.4372 | 20.5088 | 19.2275 |
| PRPF19  | 24.3655 | 25.0609 | 24.7823 | 25.0628 | 24.9006 | 24.5793 |
| PRPF31  | 20.255  | 20.5397 | 20.4439 | 20.5532 | 19.2508 | 20.1208 |
| PRPF38A | 20.1741 | 20.3955 | 20.7291 | 20.8909 | 20.3585 | 20.795  |
| PRPF38B | 18.5951 | 19.9286 | 18.5652 | 18.717  | 20.6603 | 17.9559 |
| PRPF4   | 22.2994 | 22.5423 | 22.5598 | 22.6359 | 22.3785 | 22.6302 |
| PRPF40A | 21.6079 | 21.7875 | 22.0884 | 22.042  | 21.9248 | 21.1946 |
| PRPF4B  | 16.7079 | 18.4608 | 17.3761 | 17.9958 | 18.0674 | 17.7174 |
| PRPF6   | 21.1262 | 21.9437 | 22.0489 | 22.1757 | 22.1887 | 22.2635 |
| PRPF8   | 23.3994 | 23.9507 | 24.1892 | 24.2348 | 24.0425 | 23.9476 |
| PRPS2   | 21.1684 | 21.7451 | 20.737  | 20.6929 | 22.2696 | 20.761  |
| PRPSAP1 | 19.069  | 18.6573 | 18.9767 | 18.5382 | 18.9101 | 19.4657 |
| PRRC1   | 21.2151 | 20.7444 | 20.8915 | 20.4593 | 21.5364 | 20.5272 |
| PRRC2A  | 19.3694 | 19.4581 | 17.9418 | 18.5141 | 19.7758 | 18.6819 |
| PSAP    | 22.0455 | 22.092  | 22.1428 | 22.2124 | 22.1845 | 23.3871 |
| PSAT1   | 21.3962 | 19.3207 | 21.1218 | 21.3424 | 19.8972 | 23.5475 |
| PSIP1   | 20.376  | 20.2405 | 20.0609 | 20.2169 | 19.849  | 21.0029 |
| PSMA1   | 24.611  | 24.1365 | 24.0279 | 24.0035 | 24.5374 | 24.3835 |
| PSMA2   | 23.1994 | 23.0096 | 22.7727 | 22.7392 | 22.8116 | 22.811  |
| PSMA3   | 23.6225 | 23.2252 | 22.9898 | 22.7577 | 23.753  | 23.3969 |
| PSMA4   | 24.0316 | 23.2491 | 23.4365 | 23.1834 | 23.4352 | 23.785  |
| PSMA5   | 24.9614 | 24.9011 | 25.1041 | 24.6595 | 24.6485 | 24.7443 |
| PSMA6   | 24.4712 | 23.8971 | 23.6165 | 23.5596 | 24.2396 | 24.2676 |
| PSMA7   | 25.1868 | 24.4456 | 24.5219 | 24.4775 | 24.8962 | 25.1047 |

|        |         |         |         |         |         |         |
|--------|---------|---------|---------|---------|---------|---------|
| PSMB1  | 24.6895 | 24.19   | 23.7916 | 23.6354 | 24.6174 | 24.3922 |
| PSMB10 | 21.5078 | 19.6629 | 19.6368 | 19.777  | 18.9133 | 17.7426 |
| PSMB2  | 23.359  | 22.6361 | 22.6305 | 22.6699 | 22.9995 | 23.0614 |
| PSMB3  | 22.4334 | 21.8155 | 21.7273 | 21.8976 | 21.2068 | 21.6965 |
| PSMB4  | 22.3908 | 21.4225 | 21.5475 | 21.6031 | 22.1344 | 22.1345 |
| PSMB5  | 21.9881 | 22.5744 | 21.9414 | 21.9676 | 23.2427 | 23.2648 |
| PSMB6  | 21.4431 | 21.9264 | 21.3896 | 21.2566 | 22.7088 | 22.6157 |
| PSMB7  | 21.8955 | 22.1185 | 21.6266 | 21.3433 | 22.681  | 22.1788 |
| PSMB8  | 22.7948 | 21.0115 | 21.6827 | 21.5089 | 21.0203 | 20.4997 |
| PSMB9  | 22.7277 | 21.2474 | 21.0092 | 21.287  | 21.0977 | 19.2861 |
| PSMC1  | 22.6622 | 22.9218 | 22.4359 | 22.5762 | 23.7057 | 23.8342 |
| PSMC2  | 24.7667 | 24.4236 | 24.3756 | 24.1755 | 24.9377 | 25.1033 |
| PSMC3  | 23.7825 | 23.0565 | 22.797  | 23.0676 | 23.3559 | 23.718  |
| PSMC4  | 24.2864 | 23.9397 | 23.979  | 23.8887 | 24.3806 | 24.5705 |
| PSMC5  | 23.6669 | 23.0377 | 23.5482 | 23.4229 | 23.4716 | 24.2214 |
| PSMC6  | 24.0227 | 23.4764 | 23.2129 | 23.2348 | 23.8453 | 23.9095 |
| PSMD1  | 24.0962 | 23.99   | 24.2471 | 24.0724 | 24.4051 | 24.6291 |
| PSMD10 | 20.0525 | 18.2032 | 19.689  | 19.1906 | 19.1003 | 20.4542 |
| PSMD11 | 24.3012 | 23.9467 | 24.3171 | 24.2494 | 24.3342 | 24.9304 |
| PSMD12 | 22.7779 | 22.8802 | 22.9022 | 22.7972 | 23.3262 | 23.5827 |
| PSMD13 | 24.0983 | 23.9624 | 24.1503 | 23.9918 | 24.2528 | 24.4772 |
| PSMD14 | 22.5803 | 22.2369 | 22.4405 | 22.4266 | 22.7484 | 22.9824 |
| PSMD2  | 24.5632 | 24.6435 | 24.6061 | 24.3974 | 25.3075 | 25.3256 |
| PSMD3  | 22.0904 | 22.3059 | 22.7178 | 22.3978 | 23.082  | 23.3715 |
| PSMD4  | 22.8937 | 22.6987 | 22.5899 | 22.7503 | 23.1032 | 23.2072 |
| PSMD5  | 22.2681 | 21.3734 | 21.0451 | 20.7213 | 21.7785 | 22.3215 |
| PSMD6  | 23.4955 | 23.3243 | 23.4264 | 23.2856 | 23.7154 | 23.9896 |
| PSMD7  | 23.2083 | 23.346  | 23.2558 | 23.1303 | 23.3984 | 23.4932 |
| PSMD8  | 23.2433 | 22.9689 | 23.326  | 23.2542 | 23.3712 | 23.6097 |
| PSME1  | 25.101  | 23.0135 | 22.2969 | 22.0107 | 23.2493 | 23.1282 |
| PSME2  | 24.2752 | 22.8113 | 22.0349 | 21.8086 | 22.2784 | 22.0814 |
| PSME3  | 21.5595 | 21.8956 | 21.606  | 21.6442 | 21.4192 | 22.8029 |
| PSME4  | 12.7654 | 14.2834 | 15.3704 | 15.269  | 15.5885 | 17.3764 |
| PSMF1  | 20.386  | 18.7286 | 19.9086 | 19.1831 | 19.4488 | 19.8488 |
| PSMG1  | 20.0773 | 18.5621 | 19.5699 | 18.9061 | 19.2083 | 19.9099 |
| PSMG3  | 18.2474 | 18.0043 | 17.9652 | 17.9429 | 17.5698 | 18.4678 |
| PSPC1  | 22.5793 | 21.9933 | 22.1065 | 22.3864 | 21.5211 | 22.378  |
| PTBP1  | 25.6576 | 26.274  | 26.0929 | 26.1018 | 25.838  | 26.0876 |
| PTBP3  | 19.0125 | 19.0285 | 19.0498 | 19.2009 | 18.9907 | 18.703  |
| PTCD1  | 14.2037 | 15.4373 | 16.5158 | 17.1032 | 15.4677 | 17.3046 |
| PTCD3  | 19.2131 | 19.7656 | 20.4475 | 20.9686 | 19.8115 | 20.2572 |
| PTDSS1 | 17.3579 | 17.3654 | 17.6846 | 17.6279 | 16.8103 | 17.4697 |
| PTGES2 | 20.3217 | 20.5443 | 20.9887 | 20.986  | 20.3302 | 20.6661 |
| PTGES3 | 22.6838 | 21.7196 | 23.0096 | 22.7724 | 22.3656 | 23.5473 |
| PTGFRN | 23.2106 | 18.8896 | 21.3422 | 20.7364 | 19.0397 | 20.2473 |
| PTGR1  | 23.6583 | 20.7209 | 23.3342 | 23.0708 | 20.8423 | 20.5817 |
| PTGS2  | 18.889  | 18.5676 | 15.4839 | 14.3295 | 19.3637 | 14.9893 |
| PTK7   | 21.0121 | 22.275  | 22.0339 | 22.3594 | 21.2161 | 20.9285 |
| PTPMT1 | 13.9494 | 14.1273 | 16.1937 | 17.1379 | 11.6132 | 15.7033 |
| PTPN1  | 22.252  | 22.4104 | 23.3692 | 23.1524 | 22.7094 | 22.6121 |
| PTPN11 | 19.9606 | 18.9546 | 18.8746 | 18.2596 | 20.1236 | 20.0422 |
| PTPN23 | 18.7163 | 18.8742 | 18.3925 | 17.6207 | 19.8469 | 18.9606 |

|           |         |         |         |         |         |         |
|-----------|---------|---------|---------|---------|---------|---------|
| PTPRF     | 13.5233 | 14.0375 | 15.1732 | 15.9912 | 13.6323 | 13.7483 |
| PTPRK     | 18.7967 | 18.7344 | 17.8796 | 18.1688 | 19.201  | 17.6995 |
| PTRF      | 23.0315 | 23.504  | 22.8113 | 22.8456 | 23.8489 | 23.0239 |
| PTRH2     | 20.1318 | 21.2365 | 21.4246 | 21.4929 | 21.3871 | 21.9378 |
| PTTG1IP   | 17.0011 | 18.5273 | 15.4801 | 17.3449 | 17.6788 | 13.7864 |
| PTX3      | 11.2873 | 17.2256 | 16.4261 | 15.3585 | 16.1735 | 9.98585 |
| PUF60     | 24.2419 | 24.1744 | 24.158  | 24.3211 | 24.0873 | 24.5144 |
| PUM3      | 16.2481 | 18.5561 | 18.8901 | 18.481  | 18.076  | 19.8686 |
| PURA      | 21.3681 | 20.7801 | 20.8136 | 20.2737 | 21.4472 | 20.5549 |
| PURB      | 21.5617 | 20.6149 | 21.0231 | 20.6416 | 21.7571 | 20.7668 |
| PUS1      | 18.1693 | 18.8964 | 19.096  | 19.4588 | 19.1099 | 19.4586 |
| PUS7      | 17.8074 | 17.6862 | 18.1601 | 17.9537 | 17.4239 | 17.694  |
| PVRL2     | 20.4563 | 20.9566 | 20.3151 | 20.4479 | 20.6095 | 20.4639 |
| PWP2      | 18.9419 | 20.6025 | 21.8229 | 21.6053 | 20.5758 | 21.6844 |
| PXDN      | 20.7566 | 21.6013 | 19.4431 | 20.1063 | 21.3718 | 19.8305 |
| PXN       | 19.2183 | 18.6426 | 18.3506 | 18.4757 | 18.6976 | 18.9486 |
| PYCARD    | 17.0465 | 15.6596 | 19.3907 | 19.3389 | 14.2984 | 12.0362 |
| PYCR1     | 19.8533 | 19.542  | 20.9394 | 21.1805 | 19.6853 | 20.0493 |
| PYCR2     | 21.3076 | 21.0047 | 21.3478 | 21.8723 | 21.3334 | 21.6512 |
| PYGB      | 24.9081 | 23.3012 | 24.1055 | 23.6864 | 23.9852 | 26.3664 |
| PYGL      | 21.295  | 20.2686 | 20.4535 | 20.2678 | 20.8515 | 22.233  |
| PZP       | 23.1916 | 23.6352 | 19.5094 | 20.4362 | 23.6463 | 17.7378 |
| QARS      | 24.1502 | 24.0914 | 24.242  | 24.0934 | 24.4697 | 25.1417 |
| QDPR      | 19.657  | 19.0386 | 18.1125 | 18.3482 | 19.3853 | 19.5175 |
| QKI       | 21.6082 | 21.3494 | 21.0852 | 21.0899 | 21.5405 | 22.5424 |
| QRSL1     | 17.2785 | 16.4651 | 17.1307 | 17.0936 | 17.1233 | 16.541  |
| QSOX2     | 20.6414 | 21.0583 | 21.8318 | 21.5527 | 21.4698 | 21.2361 |
| QTRT1     | 17.099  | 17.1319 | 17.2066 | 17.1893 | 17.6911 | 17.7201 |
| RAB10     | 22.3452 | 21.9983 | 21.9174 | 22.0153 | 22.4351 | 22.3094 |
| RAB11B    | 24.4461 | 24.8802 | 24.601  | 24.8777 | 24.7607 | 24.691  |
| RAB11FIP5 | 14.5101 | 18.0303 | 17.4652 | 17.3768 | 17.4407 | 14.5211 |
| RAB12     | 18.9132 | 19.1358 | 19.5591 | 19.6016 | 18.9378 | 20.1615 |
| RAB13     | 21.274  | 22.504  | 21.4048 | 21.6037 | 22.8072 | 21.4294 |
| RAB14     | 22.3303 | 22.0162 | 22.3884 | 22.3302 | 22.4728 | 22.1137 |
| RAB18     | 21.588  | 21.4014 | 21.7612 | 21.629  | 21.5406 | 20.9396 |
| RAB1A     | 22.4138 | 22.7104 | 22.6968 | 22.8534 | 22.7338 | 21.6915 |
| RAB1B     | 22.5995 | 22.8703 | 22.5094 | 23.0193 | 22.4345 | 21.3425 |
| RAB21     | 21.6023 | 21.9959 | 21.1888 | 21.3078 | 22.066  | 21.0828 |
| RAB22A    | 17.2396 | 18.3101 | 18.0579 | 18.2316 | 17.5569 | 17.9172 |
| RAB23     | 18.2401 | 18.2855 | 17.3917 | 18.0517 | 18.7206 | 18.38   |
| RAB27A    | 19.9324 | 20.2378 | 20.5726 | 20.0365 | 20.4119 | 20.3365 |
| RAB2A     | 24.4435 | 24.2917 | 24.8705 | 24.9152 | 24.2877 | 23.5849 |
| RAB31     | 20.1531 | 20.659  | 19.9732 | 20.0473 | 20.4953 | 19.2818 |
| RAB32     | 19.3423 | 21.439  | 21.0461 | 20.2418 | 22.0432 | 21.3964 |
| RAB34     | 18.9444 | 21.2798 | 21.3748 | 21.227  | 20.9228 | 20.5551 |
| RAB35     | 23.0857 | 20.4962 | 20.7893 | 21.3528 | 19.517  | 19.8224 |
| RAB3GAP1  | 23.37   | 23.8885 | 23.0762 | 22.9052 | 22.6768 | 22.7321 |
| RAB3GAP2  | 19.8608 | 19.6487 | 18.8153 | 18.2101 | 20.3312 | 19.6383 |
| RAB5A     | 19.2334 | 20.1694 | 19.9419 | 20.1102 | 19.4837 | 19.3235 |
| RAB5B     | 20.0085 | 19.7153 | 20.6422 | 20.3164 | 19.7826 | 18.0341 |
| RAB5C     | 22.6994 | 23.0175 | 23.3369 | 23.5898 | 22.664  | 22.9303 |
| RAB6A     | 21.7578 | 21.8526 | 21.9665 | 21.9122 | 22.1295 | 21.5294 |

|          |         |         |         |         |         |         |
|----------|---------|---------|---------|---------|---------|---------|
| RAB6C    | 19.3503 | 19.7732 | 19.0029 | 18.7489 | 19.6286 | 18.1918 |
| RAB7A    | 25.3874 | 25.9316 | 25.0059 | 25.2115 | 25.8592 | 25.5591 |
| RAB8A    | 19.4334 | 20.1159 | 20.0638 | 20.3868 | 20.0411 | 20.3708 |
| RAB8B    | 18.3827 | 20.6538 | 20.1567 | 20.6086 | 20.7252 | 19.7699 |
| RAB9A    | 16.8468 | 14.9606 | 15.9274 | 15.7131 | 14      | 13.9363 |
| RABAC1   | 20.0421 | 20.2327 | 20.4001 | 20.3446 | 20.2861 | 19.5027 |
| RABL3    | 17.6019 | 17.8139 | 17.5568 | 18.295  | 17.2147 | 17.2496 |
| RAC1     | 21.6067 | 22.7473 | 22.2171 | 22.7546 | 23.3204 | 23.4519 |
| RAC2     | 15.8271 | 21.0095 | 21.5031 | 21.1388 | 22.0037 | 16.0075 |
| RACGAP1  | 19.1655 | 19.3126 | 20.202  | 20.3036 | 19.2923 | 19.1272 |
| RAD21    | 20.9019 | 20.2876 | 21.3873 | 21.4958 | 20.281  | 20.4647 |
| RAD23A   | 17.2849 | 15.8685 | 15.2361 | 14.8883 | 14.2947 | 16.6158 |
| RAD23B   | 21.4065 | 20.9748 | 20.7295 | 20.6427 | 21.4054 | 21.9213 |
| RAD50    | 21.5549 | 21.2267 | 21.6978 | 21.6331 | 21.3554 | 20.791  |
| RAE1     | 21.2012 | 21.7999 | 21.8668 | 22.0251 | 21.7795 | 21.6122 |
| RAI14    | 20.746  | 21.2395 | 19.849  | 19.508  | 21.7048 | 19.2589 |
| RALA     | 20.7442 | 22.764  | 22.6367 | 22.7074 | 22.9448 | 21.5344 |
| RALB     | 17.5843 | 21.0385 | 19.6626 | 19.9731 | 21.3083 | 18.2713 |
| RALY     | 23.5396 | 23.1715 | 23.9291 | 24.3548 | 23.2794 | 23.3257 |
| RAN      | 26.2405 | 25.9625 | 25.8987 | 25.7549 | 26.1115 | 26.4462 |
| RANBP1   | 22.3433 | 21.7523 | 22.0174 | 21.6405 | 21.7428 | 21.7537 |
| RANBP2   | 21.8993 | 22.9637 | 22.462  | 22.6042 | 23.1275 | 21.737  |
| RANBP6   | 16.4602 | 17.1034 | 16.2219 | 15.9153 | 16.4573 | 18.1893 |
| RANBP9   | 18.7775 | 18.2152 | 18.7701 | 18.8456 | 18.3289 | 18.6717 |
| RANGAP1  | 23.5111 | 23.4851 | 23.6303 | 23.5679 | 23.7617 | 23.837  |
| RAP1B    | 18.9341 | 20.9699 | 21.2689 | 21.3436 | 21.6006 | 20.9913 |
| RAP1GDS1 | 20.9829 | 20.6388 | 19.5788 | 19.077  | 21.0168 | 20.7593 |
| RAP2B    | 18.7615 | 19.9635 | 19.1016 | 19.619  | 18.7074 | 19.6282 |
| RAPH1    | 19.399  | 17.3365 | 16.6428 | 17.4276 | 16.7574 | 16.8491 |
| RARS     | 24.9755 | 24.3113 | 24.6504 | 24.4181 | 24.8932 | 25.4399 |
| RARS2    | 16.6744 | 17.4246 | 17.2841 | 17.5647 | 16.4479 | 17.4645 |
| RASA1    | 18.1791 | 15.43   | 17.2726 | 16.0299 | 16.4274 | 16.5936 |
| RASA3    | 17.8725 | 19.5945 | 19.0327 | 18.7453 | 19.8858 | 17.2736 |
| RAVER1   | 21.3084 | 21.4753 | 20.6897 | 20.7696 | 21.5519 | 21.8941 |
| RB1      | 18.7322 | 15.5545 | 17.4573 | 16.6153 | 16.0616 | 17.9676 |
| RBBP4    | 22.6315 | 22.898  | 22.6328 | 22.8393 | 22.7405 | 22.9179 |
| RBBP5    | 19.3992 | 19.1183 | 19.6686 | 20.1557 | 18.8897 | 19.3462 |
| RBBP7    | 21.675  | 22.0289 | 22.2938 | 22.474  | 21.5717 | 21.4794 |
| RBFOX2   | 19.2    | 18.9734 | 19.5642 | 19.2316 | 18.8921 | 18.7968 |
| RBM10    | 20.0169 | 19.5168 | 20.6813 | 20.9606 | 19.6766 | 19.0613 |
| RBM12    | 21.1588 | 21.1343 | 20.8028 | 20.7743 | 21.0003 | 21.5271 |
| RBM12B   | 19.9171 | 20.0617 | 20.1783 | 20.1497 | 20.3142 | 20.5764 |
| RBM14    | 23.0995 | 22.7326 | 23.4835 | 23.8649 | 22.6959 | 23.9474 |
| RBM15    | 20.2605 | 19.9324 | 20.6352 | 20.8208 | 20.2074 | 20.3307 |
| RBM17    | 20.2052 | 20.0699 | 20.437  | 20.6919 | 19.8865 | 20.7869 |
| RBM22    | 18.1641 | 18.2796 | 18.4326 | 18.4099 | 17.2839 | 18.0885 |
| RBM25    | 22.0671 | 22.1072 | 21.9257 | 22.2222 | 22.0973 | 22.0481 |
| RBM26    | 18.0782 | 17.2369 | 18.4162 | 18.2416 | 18.031  | 17.7751 |
| RBM27    | 17.3566 | 16.3603 | 18.4596 | 18.4387 | 15.0978 | 17.5747 |
| RBM3     | 22.1191 | 21.8392 | 21.4679 | 21.3027 | 21.9149 | 22.0756 |
| RBM39    | 23.2398 | 22.9116 | 23.0686 | 23.3687 | 22.6285 | 23.0952 |
| RBM4     | 22.0222 | 22.37   | 22.6571 | 22.7551 | 22.1951 | 22.9137 |

|        |         |         |         |         |         |         |
|--------|---------|---------|---------|---------|---------|---------|
| RBM42  | 19.0766 | 18.9518 | 19.8787 | 19.7746 | 18.8284 | 19.785  |
| RBM45  | 17.4158 | 17.4016 | 18.6338 | 18.5124 | 16.4682 | 16.5225 |
| RBM5   | 17.1534 | 17.9998 | 17.5794 | 17.9112 | 17.655  | 17.3238 |
| RBM8A  | 20.4421 | 20.7064 | 20.9114 | 21.0063 | 20.9256 | 21.2271 |
| RBMS1  | 19.8335 | 20.2127 | 19.9307 | 19.6555 | 20.9659 | 19.8495 |
| RBMX   | 21.8394 | 21.7081 | 21.5757 | 21.9458 | 22.0758 | 22.2513 |
| RBPJ   | 19.079  | 19.7422 | 18.4564 | 18.2898 | 19.7633 | 18.48   |
| RBX1   | 18.0463 | 18.1986 | 18.2606 | 18.3133 | 18.5132 | 17.9902 |
| RCC1   | 23.1782 | 23.47   | 23.2265 | 23.5629 | 23.1082 | 24.2466 |
| RCC2   | 23.7838 | 23.7973 | 23.6453 | 23.7532 | 23.5869 | 25.0627 |
| RCE1   | 16.0824 | 16.9897 | 17.3421 | 17.0088 | 16.7    | 16.4067 |
| RCL1   | 16.3952 | 18.5844 | 19.1228 | 18.7321 | 19.4052 | 19.8    |
| RCN1   | 23.0685 | 23.6877 | 23.5101 | 23.4209 | 23.6595 | 22.4128 |
| RCN2   | 18.9462 | 18.565  | 19.8848 | 19.8908 | 17.9359 | 19.2623 |
| RCN3   | 16.3892 | 19.7312 | 16.0761 | 16.3666 | 19.8476 | 15.2947 |
| RCOR1  | 21.1391 | 21.6702 | 21.0529 | 20.4977 | 21.6089 | 21.0908 |
| RDH11  | 20.508  | 21.4163 | 20.2339 | 20.6416 | 21.4153 | 20.6332 |
| RDX    | 23.3458 | 22.5364 | 23.0213 | 23.0382 | 22.612  | 23.4938 |
| RECQL  | 23.7384 | 23.8241 | 23.4132 | 22.9291 | 24.2458 | 23.2082 |
| REEP5  | 21.7363 | 20.7867 | 21.0724 | 21.5267 | 21.5113 | 21.2931 |
| RELA   | 19.504  | 18.756  | 17.7835 | 16.8533 | 19.5393 | 19.2567 |
| REPS1  | 16.6423 | 17.1939 | 17.0102 | 17.1252 | 17.5336 | 17.2605 |
| RETSAT | 17.3128 | 18.3667 | 17.5507 | 17.4365 | 16.8777 | 16.7399 |
| REXO2  | 20.9501 | 21.4169 | 20.2568 | 20.3951 | 21.8996 | 20.2529 |
| RFC2   | 19.2528 | 19.475  | 19.4783 | 19.8019 | 19.6806 | 20.341  |
| RFC3   | 26.9429 | 25.9316 | 25.3112 | 25.1044 | 26.487  | 26.9407 |
| RFC4   | 21.4918 | 21.1742 | 21.346  | 21.4572 | 21.384  | 22.0685 |
| RFC5   | 22.1944 | 21.4365 | 21.3363 | 20.9827 | 22.2042 | 22.4078 |
| RFT1   | 15.3418 | 16.7713 | 17.8283 | 17.6223 | 16.7649 | 16.1065 |
| RFTN1  | 20.1206 | 22.7058 | 20.9723 | 21.3372 | 22.4679 | 16.939  |
| RFX1   | 13.0691 | 16.1921 | 15.5335 | 15.463  | 15.629  | 14.1321 |
| RHEB   | 21.9724 | 21.2952 | 21.69   | 21.6458 | 21.6614 | 22.3718 |
| RHOA   | 20.2529 | 20.5651 | 21.1471 | 21.4346 | 20.1355 | 21.062  |
| RHOC   | 20.51   | 21.6648 | 20.9796 | 20.9257 | 21.8035 | 22.1344 |
| RHOG   | 20.27   | 22.2859 | 21.5518 | 21.7228 | 22.4263 | 21.7583 |
| RHOT1  | 17.8539 | 17.0793 | 19.3442 | 18.9112 | 17.9877 | 19.064  |
| RHOT2  | 19.6393 | 20.1886 | 20.8669 | 21.1978 | 20.2211 | 20.9562 |
| RIC8A  | 19.72   | 19.4216 | 19.409  | 18.8329 | 19.6731 | 19.2866 |
| RIF1   | 19.367  | 19.2684 | 20.5296 | 20.6817 | 19.8071 | 19.9986 |
| RIN1   | 15.4115 | 16.8302 | 14.9226 | 14.8803 | 15.7459 | 12.8292 |
| RING1  | 17.5667 | 16.7555 | 16.7173 | 17.2464 | 17.0482 | 17.1438 |
| RINT1  | 18.5485 | 19.1558 | 18.3172 | 18.1921 | 19.4545 | 18.8054 |
| RIPK1  | 18.9232 | 18.4787 | 18.3949 | 17.4559 | 19.2922 | 19.285  |
| RMDN1  | 19.8994 | 19.3476 | 19.9668 | 19.8808 | 19.6403 | 19.9204 |
| RMDN3  | 20.1108 | 19.3811 | 20.9966 | 20.8572 | 19.5251 | 20.2649 |
| RNF114 | 18.3945 | 17.1169 | 19.103  | 18.2404 | 17.3126 | 19.3385 |
| RNF20  | 18.4062 | 18.4859 | 18.7287 | 18.3756 | 18.5301 | 18.8412 |
| RNF213 | 18.814  | 18.8835 | 19.3047 | 19.3498 | 18.6737 | 19.3025 |
| RNF40  | 19.3338 | 19.1719 | 19.3599 | 19.1889 | 19.5841 | 19.0144 |
| RNGTT  | 17.5792 | 16.7155 | 16.8987 | 16.5529 | 16.7385 | 17.6082 |
| RNH1   | 25.3635 | 24.1223 | 24.114  | 24.1152 | 24.3717 | 24.2301 |
| RNMT   | 19.1317 | 20.5889 | 19.2846 | 19.4449 | 20.4132 | 20.3821 |

|        |         |         |         |         |         |         |
|--------|---------|---------|---------|---------|---------|---------|
| RNPEP  | 23.315  | 21.6567 | 21.0341 | 20.5177 | 22.2119 | 22.3029 |
| RNPS1  | 20.0162 | 20.2218 | 20.0992 | 20.6818 | 20.1331 | 20.0101 |
| ROCK1  | 18.6084 | 17.0907 | 16.9141 | 16.2757 | 17.9887 | 17.0428 |
| ROCK2  | 19.8186 | 18.4832 | 18.5522 | 18.1468 | 19.024  | 18.5642 |
| RP2    | 21.5334 | 21.8845 | 21.9647 | 21.5656 | 21.9492 | 22.1054 |
| RPA1   | 23.1948 | 22.5701 | 22.191  | 21.9695 | 22.4441 | 23.3184 |
| RPA2   | 19.3348 | 19.1081 | 19.2565 | 19.4042 | 17.4881 | 18.0273 |
| RPA3   | 20.5897 | 20.2618 | 19.8343 | 19.9888 | 20.2046 | 20.8008 |
| RPAP3  | 18.3898 | 17.8863 | 18.1657 | 17.5538 | 18.4511 | 18.5195 |
| RPE    | 19.0459 | 17.6552 | 18.7006 | 18.4041 | 17.8217 | 19.1177 |
| RPF2   | 14.9333 | 16.2165 | 15.1707 | 14.5623 | 16.373  | 17.2693 |
| RPIA   | 15.9684 | 15.7032 | 16.0195 | 15.3758 | 15.3921 | 18.4404 |
| RPL10  | 21.0243 | 21.6673 | 21.6009 | 21.8943 | 22.2606 | 22.4867 |
| RPL10A | 20.9687 | 21.4578 | 21.6294 | 21.4521 | 22.0211 | 23.027  |
| RPL11  | 23.4526 | 23.9087 | 23.8988 | 23.8388 | 24.0435 | 24.311  |
| RPL12  | 25.013  | 25.6508 | 25.4337 | 25.5924 | 25.8805 | 26.0626 |
| RPL13  | 21.293  | 22.6999 | 22.9579 | 22.6825 | 23.2723 | 23.7927 |
| RPL14  | 20.6223 | 22.0008 | 21.1954 | 20.9988 | 22.0326 | 22.3891 |
| RPL15  | 21.3755 | 22.0613 | 22.2013 | 21.9915 | 22.1891 | 22.9901 |
| RPL17  | 21.2151 | 22.1562 | 21.7641 | 21.6179 | 21.8432 | 22.8157 |
| RPL18  | 19.3009 | 20.3493 | 19.7666 | 19.797  | 20.3664 | 21.4537 |
| RPL18A | 22.2398 | 23.0819 | 23.0832 | 22.8065 | 23.7222 | 23.8816 |
| RPL19  | 19.0491 | 19.0382 | 18.7769 | 18.4431 | 19.6448 | 20.2604 |
| RPL21  | 21.234  | 22.32   | 22.0171 | 21.9996 | 22.6118 | 23.3823 |
| RPL22  | 22.314  | 23.2555 | 23.4725 | 22.9955 | 23.8715 | 24.2157 |
| RPL23  | 21.4808 | 21.8111 | 22.0849 | 22.2091 | 22.4436 | 23.4073 |
| RPL23A | 22.2628 | 23.0013 | 23.0476 | 23.0121 | 23.383  | 23.8967 |
| RPL24  | 21.4586 | 22.0882 | 21.6701 | 21.4905 | 22.3919 | 22.6927 |
| RPL26  | 21.3583 | 22.5678 | 21.9025 | 21.814  | 22.9929 | 23.367  |
| RPL27  | 22.3886 | 23.566  | 23.4589 | 23.1394 | 24.0543 | 24.62   |
| RPL27A | 22.6443 | 23.4508 | 23.9059 | 23.4944 | 24.0557 | 24.4386 |
| RPL28  | 17.781  | 18.5883 | 18.5706 | 18.4902 | 18.9228 | 20.0419 |
| RPL3   | 22.1954 | 22.8295 | 22.9899 | 22.7152 | 23.2624 | 23.9945 |
| RPL30  | 23.2    | 23.8794 | 23.9041 | 23.5861 | 24.2043 | 24.7748 |
| RPL31  | 19.5262 | 20.8091 | 20.2173 | 20.4848 | 21.106  | 21.4808 |
| RPL32  | 18.1738 | 17.9558 | 19.2235 | 19.2705 | 18.1797 | 19.5519 |
| RPL35A | 20.9181 | 21.5905 | 21.7564 | 21.2999 | 22.3767 | 22.7507 |
| RPL36A | 18.6957 | 19.0812 | 19.1183 | 19.1671 | 19.8208 | 20.4386 |
| RPL37A | 19.1867 | 20.7451 | 20.8641 | 20.5624 | 21.1696 | 21.587  |
| RPL38  | 21.5366 | 20.9667 | 22.3843 | 22.1611 | 21.1516 | 23.4224 |
| RPL4   | 24.2263 | 24.73   | 24.6004 | 24.412  | 24.8512 | 25.4902 |
| RPL5   | 23.5535 | 24.2386 | 24.0965 | 23.7729 | 24.559  | 24.6057 |
| RPL6   | 22.1577 | 22.5879 | 21.7786 | 21.8212 | 22.8409 | 23.3714 |
| RPL7   | 21.2382 | 21.8976 | 21.8541 | 21.7164 | 22.4875 | 23.5199 |
| RPL7A  | 21.8883 | 22.9593 | 22.874  | 22.6514 | 23.4471 | 24.1857 |
| RPL8   | 21.0245 | 22.2047 | 21.6485 | 21.6181 | 22.5589 | 23.0365 |
| RPL9   | 21.8073 | 22.6502 | 22.8333 | 23.0101 | 21.9774 | 23.6081 |
| RPLP0  | 25.7061 | 25.7749 | 25.9075 | 25.7968 | 26.1973 | 26.8301 |
| RPLP1  | 21.4044 | 21.6454 | 22.3256 | 22.3927 | 21.6558 | 22.334  |
| RPLP2  | 19.8952 | 20.6073 | 20.5213 | 20.4601 | 20.9443 | 20.7793 |
| RPN1   | 27.3907 | 27.3331 | 27.1106 | 27.0712 | 27.5933 | 27.1644 |
| RPN2   | 25.1744 | 26.2679 | 25.7951 | 25.8498 | 26.1884 | 24.9293 |



|         |         |         |         |         |         |         |
|---------|---------|---------|---------|---------|---------|---------|
| RPP30   | 19.4715 | 20.4746 | 20.7815 | 20.6856 | 20.2095 | 20.4804 |
| RPP40   | 15.3753 | 16.678  | 17.7824 | 17.6275 | 15.1115 | 17.0619 |
| RPRD1B  | 21.0762 | 20.6714 | 21.5546 | 21.4698 | 20.7667 | 20.8955 |
| RPRD2   | 19.9078 | 20.4683 | 20.1402 | 20.0814 | 20.6352 | 20.5688 |
| RPS10   | 24.5786 | 24.4499 | 24.5424 | 24.6775 | 24.712  | 25.2338 |
| RPS11   | 22.3722 | 23.3116 | 22.7955 | 22.9633 | 23.6929 | 24.1385 |
| RPS12   | 24.0137 | 24.1583 | 24.5452 | 24.3831 | 24.357  | 24.481  |
| RPS13   | 22.1989 | 23.299  | 23.2995 | 22.9893 | 23.6017 | 24.2274 |
| RPS14   | 23.0506 | 23.3194 | 23.4981 | 23.3834 | 24.1317 | 24.7309 |
| RPS15   | 17.2872 | 17.6057 | 18.5468 | 19.267  | 17.0891 | 17.8416 |
| RPS15A  | 23.2716 | 23.6949 | 23.9964 | 24.0097 | 24.1444 | 24.4638 |
| RPS16   | 23.2872 | 24.0364 | 23.8335 | 23.7675 | 24.6913 | 24.9683 |
| RPS17   | 22.0111 | 22.7712 | 22.2478 | 22.2949 | 22.8185 | 23.5312 |
| RPS18   | 22.5982 | 23.4203 | 23.5918 | 23.2422 | 23.801  | 24.094  |
| RPS19   | 23.2181 | 23.5639 | 23.3586 | 23.2788 | 23.9274 | 24.3252 |
| RPS2    | 24.0557 | 24.6751 | 25.0012 | 24.7651 | 25.1975 | 25.8118 |
| RPS20   | 23.68   | 24.1457 | 23.8133 | 23.6871 | 24.4836 | 24.8809 |
| RPS21   | 20.5242 | 20.6378 | 20.6938 | 21.1949 | 21.4082 | 21.6571 |
| RPS23   | 22.0824 | 22.4799 | 22.7238 | 22.5897 | 22.7164 | 23.3919 |
| RPS24   | 20.6363 | 21.5625 | 21.46   | 21.4546 | 20.6325 | 21.5041 |
| RPS25   | 22.8192 | 23.7122 | 23.7543 | 23.6561 | 24.2177 | 24.7247 |
| RPS26   | 21.7259 | 22.1431 | 22.1725 | 21.968  | 22.4424 | 22.8543 |
| RPS27   | 21.6081 | 21.4669 | 21.4661 | 21.8792 | 22.2954 | 22.528  |
| RPS27A  | 26.7859 | 26.7755 | 26.7808 | 26.8788 | 26.9801 | 27.1985 |
| RPS28   | 21.7271 | 21.8275 | 21.735  | 21.7343 | 21.8775 | 21.8423 |
| RPS29   | 17.773  | 18.5514 | 18.4736 | 18.4213 | 19.4894 | 18.8466 |
| RPS3    | 25.6061 | 25.9366 | 26.0075 | 25.9076 | 26.2913 | 26.8851 |
| RPS3A   | 23.9462 | 24.6939 | 24.5755 | 24.4602 | 25.1896 | 25.716  |
| RPS4X   | 23.2959 | 24.0547 | 23.9899 | 24.1039 | 24.3303 | 25.1717 |
| RPS5    | 22.1868 | 23.1354 | 22.8563 | 22.7776 | 23.6061 | 23.9355 |
| RPS6    | 21.8389 | 22.0591 | 22.5504 | 21.8687 | 22.3941 | 23.5834 |
| RPS6KA1 | 18.0668 | 13.9333 | 16.8053 | 16.2166 | 13.9654 | 17.4249 |
| RPS6KA3 | 19.4059 | 15.5619 | 17.1103 | 16.4553 | 16.2098 | 18.0364 |
| RPS7    | 22.7391 | 22.8232 | 23.2067 | 22.9496 | 22.6178 | 23.4248 |
| RPS8    | 23.4422 | 24.3009 | 24.3824 | 24.1923 | 24.6429 | 24.9735 |
| RPS9    | 20.5943 | 21.9341 | 22.5659 | 22.0115 | 22.2971 | 23.5717 |
| RPSA    | 26.0517 | 26.0371 | 25.9234 | 26.0055 | 26.3989 | 26.7333 |
| RPTOR   | 16.7018 | 16.4384 | 16.6382 | 16.37   | 15.1087 | 16.6128 |
| RPUSD3  | 13.6009 | 15.2484 | 16.3409 | 17.0553 | 15.715  | 17.8181 |
| RRAD    | 15.3651 | 20.1644 | 13.4597 | 14.08   | 21.8694 | 14.8132 |
| RRAGA   | 19.5028 | 19.7202 | 18.4921 | 18.5828 | 19.3242 | 18.3319 |
| RRAGC   | 19.601  | 18.95   | 17.9888 | 17.8226 | 18.8267 | 18.8078 |
| RRAS    | 20.0908 | 21.5477 | 20.3039 | 20.3727 | 21.4418 | 19.3353 |
| RRAS2   | 18.3198 | 20.446  | 19.0525 | 19.7158 | 19.5848 | 18.9667 |
| RRBP1   | 24.2052 | 25.0554 | 24.6624 | 24.9333 | 25.3153 | 23.5844 |
| RRM1    | 22.5371 | 20.7892 | 21.929  | 21.2944 | 22.1809 | 22.6961 |
| RRM2    | 21.3244 | 19.1586 | 19.357  | 19.1101 | 19.5067 | 21.1113 |
| RRN3    | 15.9628 | 16.0107 | 15.3767 | 14.5104 | 15.5671 | 14.6322 |
| RRP1    | 12.7568 | 17.2753 | 17.3393 | 17.2875 | 17.0537 | 18.0847 |
| RRP12   | 15.9488 | 18.4999 | 17.6838 | 17.2049 | 18.3216 | 18.943  |
| RRP15   | 17.4809 | 18.1538 | 19.1458 | 19.1978 | 18.3853 | 19.5655 |
| RRP8    | 17.1447 | 18.9651 | 18.6057 | 18.9353 | 18.7768 | 18.843  |

|         |         |         |         |         |         |         |
|---------|---------|---------|---------|---------|---------|---------|
| RRP9    | 19.0002 | 19.7957 | 19.7891 | 19.6641 | 19.3397 | 19.7838 |
| RRS1    | 18.5477 | 20.0506 | 20.7592 | 20.5458 | 20.1865 | 21.0743 |
| RSF1    | 17.3834 | 18.5407 | 18.9561 | 19.0105 | 18.2183 | 17.2267 |
| RSL1D1  | 18.4068 | 19.8736 | 20.832  | 20.1097 | 19.9021 | 21.5917 |
| RSU1    | 22.0829 | 22.1436 | 20.504  | 20.115  | 22.3819 | 20.7231 |
| RTCA    | 19.5175 | 19.2216 | 19.0738 | 18.5213 | 19.2925 | 19.8665 |
| RTCB    | 23.6177 | 23.4314 | 23.1575 | 23.0181 | 23.8966 | 23.4624 |
| RTN4    | 25.3713 | 25.4486 | 25.47   | 25.1664 | 26.0479 | 25.0577 |
| RTN4IP1 | 17.8243 | 17.7351 | 18.2966 | 18.3978 | 17.0658 | 16.9129 |
| RUFY1   | 19.8654 | 19.1405 | 19.7853 | 19.7194 | 19.8289 | 20.4894 |
| RUVBL1  | 24.6364 | 23.9648 | 24.378  | 24.3379 | 24.0954 | 24.3404 |
| RUVBL2  | 24.2279 | 23.7019 | 24.0857 | 23.966  | 23.9174 | 24.0896 |
| S100A10 | 19.4629 | 20.234  | 20.9253 | 21.3624 | 19.8239 | 19.2043 |
| S100A11 | 21.3666 | 21.127  | 20.0855 | 20.2568 | 21.8784 | 20.5173 |
| SAAL1   | 17.1645 | 17.7285 | 17.3459 | 16.5726 | 16.6634 | 17.5549 |
| SACM1L  | 19.7167 | 20.5572 | 19.9416 | 20.2216 | 20.1676 | 19.6176 |
| SAE1    | 22.2895 | 21.879  | 21.7125 | 21.4789 | 22.1307 | 22.5283 |
| SAFB    | 21.823  | 22.2495 | 22.0606 | 22.1763 | 22.335  | 21.8308 |
| SAFB2   | 19.551  | 19.8122 | 20.4319 | 20.2755 | 20.1667 | 19.6363 |
| SAMD4B  | 17.1334 | 15.1393 | 16.2167 | 15.9052 | 15.4075 | 15.755  |
| SAMD9   | 13.4413 | 12.9796 | 16.1413 | 14.9646 | 14.7417 | 14.7053 |
| SAMHD1  | 21.9129 | 20.8611 | 21.4658 | 20.9807 | 20.6168 | 21.6819 |
| SAMM50  | 22.6198 | 23.1682 | 23.4194 | 23.5271 | 23.2495 | 22.9628 |
| SAP18   | 21.2574 | 21.7767 | 21.8455 | 22.3592 | 21.4807 | 20.9081 |
| SAP30BP | 17.5693 | 17.9158 | 17.8747 | 18.1806 | 18.1193 | 18.8653 |
| SAR1A   | 17.2418 | 17.7425 | 17.3571 | 17.7674 | 18.131  | 18.0645 |
| SARM1   | 16.8819 | 16.5395 | 16.9422 | 16.9927 | 15.025  | 13.6754 |
| SARNP   | 21.6196 | 21.3249 | 21.665  | 21.8513 | 21.5154 | 21.5661 |
| SARS    | 23.9406 | 22.3039 | 22.5392 | 21.9232 | 23.1097 | 23.6539 |
| SARS2   | 20.1094 | 20.4525 | 20.1391 | 20.74   | 20.1121 | 19.9756 |
| SART1   | 21.1566 | 19.8771 | 21.5532 | 21.3457 | 20.3621 | 21.9164 |
| SART3   | 21.6394 | 21.768  | 21.5758 | 21.3401 | 21.6129 | 21.0034 |
| SBDS    | 21.3581 | 20.6489 | 20.3094 | 20.1452 | 20.8683 | 21.3613 |
| SCAF4   | 19.8449 | 19.6637 | 20.5223 | 20.462  | 19.617  | 19.4221 |
| SCAMP2  | 19.7925 | 19.8384 | 20.4602 | 20.8181 | 20.2099 | 20.0801 |
| SCAMP3  | 22.0484 | 21.931  | 21.9986 | 22.1328 | 22.2792 | 22.9827 |
| SCARB2  | 23.344  | 23.1699 | 22.5088 | 22.195  | 22.5107 | 21.9562 |
| SCCPDH  | 20.7253 | 20.5233 | 20.2021 | 20.4125 | 20.8995 | 20.5252 |
| SCD     | 18.1009 | 18.2182 | 20.0076 | 20.3955 | 17.4082 | 19.8942 |
| SCFD1   | 22.145  | 22.1201 | 20.8281 | 21.0062 | 21.695  | 20.6528 |
| SCFD2   | 17.2479 | 18.4669 | 17.4239 | 16.5729 | 18.0884 | 16.3214 |
| SCP2    | 22.9919 | 22.4194 | 22.6506 | 22.7449 | 22.6408 | 21.2531 |
| SCPEP1  | 21.0736 | 20.3712 | 21.0166 | 21.1735 | 20.444  | 20.2627 |
| SCRIB   | 19.6353 | 20.1087 | 20.3708 | 20.6008 | 20.0562 | 20.1921 |
| SCRN1   | 22.5742 | 22.4631 | 20.8106 | 20.5633 | 23.1273 | 22.3196 |
| SCYL1   | 19.9318 | 20.2655 | 19.515  | 19.0885 | 21.0468 | 19.4318 |
| SDC1    | 16.7016 | 19.4353 | 18.5664 | 18.9071 | 20.239  | 20.8814 |
| SDCBP   | 20.592  | 21.2783 | 19.3318 | 19.5415 | 19.2141 | 17.6269 |
| SDF2    | 17.8384 | 19.5426 | 19.1148 | 19.5472 | 18.852  | 19.5384 |
| SDF2L1  | 21.1015 | 21.3598 | 20.9929 | 21.2413 | 20.8267 | 19.8531 |
| SDF4    | 16.9496 | 18.127  | 19.2224 | 19.1899 | 17.3348 | 18.13   |
| SDHA    | 24.0072 | 23.4882 | 24.1355 | 24.1056 | 23.7981 | 23.1391 |

|          |         |         |         |         |         |         |
|----------|---------|---------|---------|---------|---------|---------|
| SDHB     | 22.6368 | 22.2154 | 22.4596 | 22.6175 | 22.3796 | 21.7512 |
| SDHC     | 19.6971 | 19.6927 | 20.66   | 20.4662 | 20.1145 | 19.3175 |
| SEC11A   | 21.4708 | 21.9581 | 22.4483 | 22.4658 | 22.16   | 21.6676 |
| SEC13    | 22.1251 | 21.9831 | 21.6634 | 21.3125 | 22.459  | 21.4641 |
| SEC22B   | 22.0752 | 23.4012 | 22.3559 | 22.8456 | 23.9016 | 23.5603 |
| SEC23A   | 23.9805 | 23.6552 | 23.2421 | 22.6221 | 24.6751 | 22.4064 |
| SEC23B   | 20.7888 | 20.6352 | 21.4372 | 21.2606 | 20.4989 | 22.4468 |
| SEC23IP  | 21.8413 | 21.3362 | 21.5724 | 20.8665 | 22.1799 | 22.5049 |
| SEC24A   | 20.9009 | 20.65   | 20.9726 | 20.3764 | 21.4654 | 20.7863 |
| SEC24B   | 19.2745 | 19.0983 | 19.454  | 18.9643 | 19.2981 | 18.5498 |
| SEC24C   | 22.2857 | 22.2461 | 22.0681 | 21.7247 | 22.9527 | 22.8808 |
| SEC24D   | 21.397  | 21.1217 | 20.463  | 19.6934 | 22.2222 | 19.7199 |
| SEC31A   | 24.1949 | 23.7524 | 23.0344 | 22.5748 | 24.627  | 23.1109 |
| SEC61A1  | 21.0244 | 22.602  | 21.3886 | 21.6053 | 22.6521 | 20.0157 |
| SEC61B   | 19.2016 | 20.5584 | 19.8172 | 20.1641 | 21.3618 | 20.0291 |
| SEC62    | 20.4751 | 20.9027 | 20.1567 | 20.5397 | 21.1257 | 20.8787 |
| SEC63    | 21.9126 | 21.7975 | 21.4336 | 21.299  | 22.3772 | 21.7231 |
| SEH1L    | 20.4788 | 21.04   | 20.6236 | 20.713  | 20.9163 | 20.7427 |
| SEL1L    | 20.1937 | 20.8297 | 20.0725 | 19.8837 | 20.4874 | 19.5363 |
| SELO     | 15.2895 | 16.8562 | 14.7818 | 15.5522 | 16.7215 | 15.3672 |
| SEMA3A   | 15.729  | 13.9843 | 14.965  | 13.8762 | 15.4889 | 18.0606 |
| SEMA3C   | 17.7239 | 17.3017 | 20.0372 | 20.0316 | 17.5902 | 19.9459 |
| SEMA7A   | 17.9038 | 21.9811 | 17.7731 | 17.1131 | 22.1167 | 19.9959 |
| SENP3    | 20.138  | 20.105  | 20.3958 | 20.6244 | 20.1898 | 19.5399 |
| SEPHS1   | 21.1719 | 20.7429 | 19.8141 | 19.6888 | 20.461  | 20.4891 |
| SEPT10   | 20.2539 | 19.5336 | 20.5147 | 19.9383 | 20.6417 | 18.6636 |
| SEPT11   | 22.6354 | 21.5039 | 20.9076 | 20.6956 | 22.1063 | 21.3045 |
| SEPT2    | 25.2984 | 24.3722 | 24.156  | 23.97   | 24.8417 | 24.1473 |
| SEPT7    | 24.6178 | 23.7836 | 23.4157 | 23.0708 | 24.1514 | 23.4691 |
| SEPT8    | 21.8202 | 20.2056 | 21.1328 | 21.0798 | 20.3018 | 20.7806 |
| SEPT9    | 24.3716 | 23.0811 | 23.3246 | 23.2252 | 23.3256 | 24.1649 |
| SERBP1   | 21.2342 | 18.8245 | 20.7248 | 20.7028 | 20.3657 | 22.2248 |
| SERINC1  | 18.2266 | 17.5051 | 17.0091 | 16.5999 | 18.2839 | 17.2325 |
| SERPINA3 | 18.9088 | 19.4454 | 18.0462 | 18.9308 | 19.7557 | 19.5004 |
| SERPINB2 | 20.0564 | 25.1056 | 19.933  | 19.5233 | 27.1968 | 20.8902 |
| SERPINB5 | 17.1764 | 17.8186 | 16.9102 | 17.0035 | 17.6877 | 17.4221 |
| SERPINB6 | 24.182  | 21.8015 | 21.866  | 21.5392 | 21.9637 | 22.1497 |
| SERPINB8 | 19.2272 | 19.8147 | 17.045  | 16.6975 | 20.2655 | 16.5228 |
| SERPINE1 | 18.07   | 21.1635 | 17.5782 | 17.5887 | 21.9566 | 20.0661 |
| SERPINE2 | 19.6316 | 20.231  | 19.7102 | 19.9269 | 19.4401 | 19.9653 |
| SERPINH1 | 26.8481 | 28.2621 | 27.2454 | 27.5168 | 27.524  | 24.7005 |
| SET      | 19.9741 | 19.8455 | 20.8931 | 20.2233 | 20.326  | 20.6593 |
| SETD3    | 19.759  | 19.2468 | 19.1405 | 18.604  | 19.6281 | 19.6498 |
| SF1      | 20.7437 | 21.1452 | 21.0728 | 21.2591 | 20.7765 | 20.7696 |
| SF3A1    | 24.4123 | 24.3057 | 24.5531 | 24.5365 | 24.4258 | 24.3    |
| SF3A2    | 21.1565 | 21.364  | 20.9823 | 21.0182 | 20.9505 | 21.0689 |
| SF3A3    | 24.6579 | 24.1256 | 23.8537 | 24.0433 | 24.0663 | 24.2823 |
| SF3B1    | 23.0669 | 23.9947 | 24.2163 | 24.3625 | 24.185  | 24.2075 |
| SF3B2    | 22.8465 | 22.7393 | 23.1128 | 23.2723 | 22.9409 | 22.9698 |
| SF3B3    | 24.7969 | 25.2087 | 25.3221 | 25.2561 | 25.3164 | 25.4458 |
| SF3B4    | 21.1118 | 20.7985 | 21.0703 | 21.11   | 20.8686 | 21.2171 |
| SF3B6    | 21.3727 | 21.6708 | 21.4247 | 21.8425 | 21.5754 | 21.5549 |

|          |         |         |         |         |         |         |
|----------|---------|---------|---------|---------|---------|---------|
| SFPQ     | 25.091  | 25.7814 | 25.2995 | 25.6053 | 25.6418 | 25.2374 |
| SFXN1    | 22.9817 | 23.3936 | 23.8536 | 24.2404 | 23.6488 | 23.6973 |
| SFXN3    | 21.671  | 22.2609 | 21.4175 | 21.2919 | 22.505  | 21.0736 |
| SGF29    | 15.5785 | 15.5885 | 16.2884 | 16.3293 | 17.0488 | 14.2813 |
| SGPL1    | 17.6526 | 16.007  | 16.7318 | 16.3109 | 17.5147 | 16.5461 |
| SGSH     | 20.8253 | 21.1552 | 20.8678 | 21.1245 | 21.5716 | 20.9705 |
| SGTA     | 19.4074 | 18.3102 | 18.9793 | 18.8908 | 18.2644 | 20.2705 |
| SH3BGRL3 | 20.1044 | 20.0492 | 18.819  | 19.2492 | 20.2651 | 19.3739 |
| SH3BP4   | 19.0902 | 20.2412 | 19.8418 | 19.984  | 20.2558 | 20.1888 |
| SH3GLB1  | 20.3279 | 19.7883 | 19.5541 | 19.0825 | 20.0295 | 19.7835 |
| SH3KBP1  | 18.9317 | 17.0038 | 17.9058 | 17.5244 | 17.5419 | 17.2801 |
| SH3PXD2B | 19.1265 | 19.3821 | 16.6521 | 16.6001 | 19.6243 | 19.5016 |
| SHC1     | 18.2103 | 16.5833 | 18.3003 | 18.2404 | 15.9852 | 18.5149 |
| SHCBP1   | 18.52   | 16.426  | 18.0918 | 17.4505 | 17.1037 | 18.1646 |
| SHMT1    | 21.6414 | 18.7787 | 19.5499 | 19.347  | 19.4069 | 21.6093 |
| SHMT2    | 25.3364 | 25.4029 | 25.9061 | 26.0638 | 25.5474 | 25.4285 |
| SHTN1    | 14.215  | 13.9795 | 15.1416 | 14.0723 | 12.7692 | 18.9478 |
| SIGLEC10 | 17.2139 | 15.6718 | 15.2915 | 15.0729 | 16.459  | 17.4257 |
| SIGMAR1  | 18.8943 | 20.2265 | 20.2117 | 20.2274 | 20.1776 | 18.8018 |
| SIL1     | 18.6737 | 20.2346 | 20.2528 | 20.178  | 19.9761 | 17.959  |
| SIN3A    | 17.3931 | 18.1466 | 19.0944 | 19.1815 | 17.4107 | 17.917  |
| SIPA1L1  | 19.3069 | 17.8404 | 17.9804 | 18.0215 | 18.1228 | 17.4006 |
| SIRT3    | 17.0053 | 16.9329 | 17.4354 | 18.3003 | 16.2507 | 16.337  |
| SKIV2L   | 19.7006 | 18.5315 | 19.3172 | 19.3301 | 19.3129 | 19.357  |
| SKIV2L2  | 22.2181 | 22.9084 | 23.3777 | 23.2745 | 22.9552 | 23.2151 |
| SKP1     | 20.7073 | 20.8509 | 21.112  | 20.8697 | 20.7152 | 21.1013 |
| SLC12A2  | 19.396  | 18.3622 | 18.5115 | 18.3618 | 19.2942 | 18.9901 |
| SLC12A4  | 17.2498 | 17.6342 | 16.9042 | 16.9552 | 18.0264 | 16.548  |
| SLC12A7  | 21.0814 | 14.7918 | 17.1133 | 17.1932 | 15.4138 | 15.11   |
| SLC12A9  | 18.3365 | 17.8842 | 16.7691 | 17.2009 | 17.4594 | 16.6706 |
| SLC14A1  | 18.0663 | 11.9382 | 12.4918 | 10.5409 | NA      | 7.03647 |
| SLC16A1  | 20.5214 | 21.5401 | 20.9475 | 20.9675 | 21.2358 | 21.7381 |
| SLC16A3  | 20.9507 | 21.445  | 20.9244 | 21.0995 | 21.4653 | 21.8332 |
| SLC1A3   | 17.1581 | 17.1017 | 16.0305 | 16.1819 | 15.1397 | 16.8555 |
| SLC1A4   | 19.8814 | 17.4375 | 18.2686 | 17.846  | 17.504  | 18.3294 |
| SLC1A5   | 23.3552 | 22.8711 | 23.5004 | 23.4264 | 22.8937 | 23.2132 |
| SLC25A1  | 19.9944 | 21.0043 | 20.6301 | 21.3245 | 20.9693 | 20.4835 |
| SLC25A10 | 19.8658 | 19.8487 | 21.4436 | 21.8721 | 19.9844 | 21.9118 |
| SLC25A11 | 22.462  | 22.7463 | 23.1215 | 23.0526 | 22.5662 | 22.7    |
| SLC25A12 | 22.2356 | 22.6669 | 22.0374 | 22.2125 | 22.987  | 22.1949 |
| SLC25A13 | 22.5972 | 23.4166 | 23.4756 | 23.73   | 23.3968 | 23.2879 |
| SLC25A17 | 15.0385 | 14.3771 | 17.2018 | 16.8349 | 14.4714 | 16.0298 |
| SLC25A22 | 17.5383 | 19.1321 | 20.0541 | 20.5806 | 18.1758 | 19.188  |
| SLC25A24 | 21.0999 | 22.0272 | 22.5174 | 22.5139 | 22.3783 | 20.1016 |
| SLC25A3  | 22.978  | 24.0233 | 23.5432 | 24.0604 | 24.526  | 23.3722 |
| SLC25A32 | 15.0005 | 16.7971 | 18.2802 | 18.1688 | 16.4596 | 17.0328 |
| SLC25A4  | 19.061  | 17.6252 | 18.793  | 18.737  | 17.5789 | 19.9195 |
| SLC25A5  | 24.6856 | 24.8389 | 25.5787 | 25.7072 | 25.3623 | 26.0332 |
| SLC25A6  | 23.4399 | 22.6485 | 23.7432 | 24.0623 | 22.9765 | 23.1299 |
| SLC26A2  | 19.4432 | 18.4347 | 18.6659 | 18.6293 | 18.6468 | 18.8728 |
| SLC2A1   | 22.4777 | 22.542  | 23.8505 | 23.5047 | 22.3431 | 23.581  |
| SLC30A1  | 19.8665 | 19.3837 | 18.296  | 17.0241 | 20.2726 | 18.8321 |

|          |         |         |         |         |         |         |
|----------|---------|---------|---------|---------|---------|---------|
| SLC30A7  | 21.4039 | 21.6985 | 21.8071 | 21.5023 | 22.5545 | 21.2804 |
| SLC35B2  | 20.2269 | 20.6702 | 19.9597 | 19.9811 | 20.8252 | 20.7381 |
| SLC35F6  | 18.1366 | 18.1183 | 18.1374 | 18.0714 | 18.0915 | 16.5379 |
| SLC38A2  | 21.8913 | 21.6916 | 22.041  | 21.7205 | 21.94   | 21.5104 |
| SLC39A14 | 19.4489 | 20.7263 | 19.7265 | 19.4472 | 21.8548 | 19.2642 |
| SLC39A7  | 18.4819 | 19.7359 | 19.63   | 19.7718 | 20.0815 | 17.8101 |
| SLC3A2   | 26.0837 | 23.3797 | 25.9076 | 25.6383 | 24.1245 | 25.6567 |
| SLC44A1  | 18.6089 | 19.0327 | 17.4427 | 18.523  | 17.6534 | 18.2875 |
| SLC4A7   | 17.6784 | 18.1391 | 19.1915 | 18.8895 | 17.9954 | 19.6331 |
| SLC5A3   | 20.3171 | 19.1986 | 19.9367 | 20.4655 | 18.5296 | 18.2876 |
| SLC6A6   | 17.5881 | 18.2013 | 19.1284 | 18.6523 | 18.4861 | 18.7792 |
| SLC7A11  | 19.3773 | 16.8274 | 18.6318 | 18.3444 | 17.4362 | 18.1232 |
| SLC7A5   | 21.005  | 16.8039 | 20.7923 | 20.4735 | 17.1732 | 21.2806 |
| SLC9A3R1 | 12.3728 | 18.6719 | 17.5414 | 17.264  | 19.4187 | 19.2002 |
| SLC9A3R2 | 19.9433 | 19.0637 | 20.0581 | 19.8602 | 19.6715 | 21.2894 |
| SLFN5    | 18.1126 | 20.8316 | 20.9289 | 20.3136 | 21.612  | 19.6047 |
| SLIRP    | 21.1601 | 21.8005 | 21.7183 | 22.1148 | 21.8514 | 21.3767 |
| SLK      | 18.0826 | 17.7759 | 17.1498 | 17.2274 | 18.1829 | 17.6843 |
| SMAD3    | 18.0151 | 17.5829 | 19.3314 | 19.3217 | 18.5677 | 18.5519 |
| SMARCA1  | 19.9571 | 19.3492 | 20.8302 | 20.7382 | 19.7513 | 21.5657 |
| SMARCA4  | 14.9908 | 15.7961 | 17.1522 | 16.1339 | 15.8533 | 17.3198 |
| SMARCA5  | 21.0023 | 21.7661 | 21.9154 | 21.5213 | 22.1399 | 21.8745 |
| SMARCB1  | 20.2942 | 20.3634 | 20.7024 | 20.7829 | 20.3125 | 20.7896 |
| SMARCC1  | 20.5687 | 21.4269 | 21.0324 | 21.3956 | 21.0636 | 21.6966 |
| SMARCC2  | 21.3276 | 21.202  | 21.4705 | 21.7343 | 21.3321 | 20.3103 |
| SMARCD1  | 17.7184 | 18.9525 | 18.4228 | 18.8435 | 18.9797 | 19.2339 |
| SMARCE1  | 20.3179 | 20.5789 | 20.5919 | 20.9974 | 20.4982 | 20.8484 |
| SMC1A    | 22.3527 | 22.1994 | 22.3192 | 22.5034 | 22.3253 | 22.1013 |
| SMC2     | 23.5725 | 23.3186 | 23.0287 | 22.4868 | 23.7042 | 23.1563 |
| SMC3     | 22.9234 | 22.3071 | 22.9546 | 22.9792 | 22.6318 | 22.5161 |
| SMC4     | 22.3514 | 21.2958 | 21.9792 | 21.7326 | 21.9025 | 21.7819 |
| SMC6     | 15.6315 | 16.181  | 17.184  | 17.1455 | 16.0519 | 15.5838 |
| SMCHD1   | 21.9177 | 21.8153 | 21.7093 | 21.7604 | 21.9475 | 21.3849 |
| SMPD4    | 19.263  | 19.7187 | 20.0046 | 19.7165 | 20.1257 | 17.9492 |
| SMS      | 21.6217 | 19.348  | 20.69   | 19.7733 | 19.3672 | 20.2904 |
| SMU1     | 22.8267 | 23.1944 | 23.3547 | 23.4992 | 22.8443 | 23.6444 |
| SND1     | 26.129  | 26.2358 | 26.3471 | 26.2523 | 26.6245 | 26.002  |
| SNRNP200 | 24.5936 | 25.1789 | 25.3663 | 25.5556 | 24.9827 | 24.767  |
| SNRNP40  | 20.9431 | 21.364  | 21.8856 | 21.9228 | 21.1335 | 21.4364 |
| SNRNP70  | 23.1343 | 23.4285 | 23.2593 | 23.512  | 23.6225 | 23.9062 |
| SNRPA    | 21.1711 | 19.5865 | 21.5676 | 21.8276 | 18.7607 | 21.1166 |
| SNRPA1   | 22.0319 | 22.3979 | 22.4966 | 22.5793 | 22.464  | 22.501  |
| SNRPB    | 23.8784 | 23.9018 | 24.0648 | 24.1892 | 23.9066 | 24.0295 |
| SNRPB2   | 19.9915 | 20.076  | 20.7257 | 20.831  | 19.8639 | 20.0775 |
| SNRPD1   | 21.7337 | 23.1669 | 22.6499 | 22.8073 | 22.9578 | 22.6189 |
| SNRPD2   | 23.4355 | 23.9301 | 23.651  | 23.7622 | 23.8643 | 23.7177 |
| SNRPD3   | 22.8384 | 23.8667 | 23.3895 | 23.7019 | 23.6975 | 23.4709 |
| SNRPE    | 21.1467 | 21.7309 | 22.0861 | 22.683  | 21.2673 | 21.2432 |
| SNTB2    | 20.8552 | 20.0011 | 19.7926 | 19.9928 | 20.1104 | 20.3388 |
| SNU13    | 21.1032 | 21.9257 | 21.353  | 21.9478 | 21.8444 | 21.4671 |
| SNW1     | 18.3534 | 16.9206 | 18.5982 | 18.8722 | 16.4292 | 17.6874 |
| SNX1     | 20.5106 | 19.1538 | 20.133  | 19.6409 | 19.8174 | 20.4514 |

|          |         |         |         |         |         |         |
|----------|---------|---------|---------|---------|---------|---------|
| SNX12    | 19.5445 | 18.0411 | 18.466  | 18.1524 | 18.8272 | 19.0399 |
| SNX17    | 19.6424 | 19.2611 | 17.7386 | 18.4641 | 19.4978 | 18.9077 |
| SNX18    | 21.2652 | 19.9218 | 20.5265 | 20.5123 | 19.8787 | 20.702  |
| SNX2     | 21.9582 | 21.2228 | 20.6102 | 20.1653 | 21.5602 | 21.9211 |
| SNX27    | 20.4084 | 20.4449 | 19.7277 | 19.4387 | 21.0155 | 20.0599 |
| SNX3     | 21.4921 | 21.0357 | 20.4756 | 20.8436 | 21.1391 | 21.967  |
| SNX4     | 19.318  | 18.6231 | 17.7499 | 17.95   | 18.4974 | 18.8599 |
| SNX5     | 20.8489 | 19.4662 | 20.3809 | 19.9928 | 20.1601 | 20.534  |
| SNX6     | 20.3839 | 19.3385 | 18.0549 | 17.8382 | 19.5783 | 19.7972 |
| SNX8     | 18.391  | 18.6679 | 18.8992 | 19.1613 | 18.3226 | 18.4407 |
| SNX9     | 21.9127 | 21.023  | 20.5314 | 20.0909 | 21.7143 | 20.5273 |
| SOAT1    | 20.3113 | 21.5181 | 21.1942 | 21.2782 | 21.4425 | 20.1533 |
| SOD1     | 21.5573 | 19.9051 | 21.076  | 20.8511 | 20.2961 | 20.7786 |
| SOD2     | 23.9912 | 27.9486 | 24.0124 | 23.4705 | 28.0084 | 22.9335 |
| SON      | 21.4196 | 21.9953 | 21.7633 | 22.5508 | 21.7505 | 21.0867 |
| SORD     | 19.1579 | 17.1313 | 19.7173 | 19.7325 | 16.6783 | 20.0502 |
| SORT1    | 18.9872 | 19.3843 | 19.0386 | 18.8147 | 19.655  | 20.2649 |
| SOX10    | 14.6754 | 15.1058 | 13.5197 | 13.9546 | 16.1218 | 13.8271 |
| SP100    | 18.0666 | 20.033  | 18.9346 | 18.7179 | 19.8474 | 17.8902 |
| SPAG9    | 21.3904 | 20.4493 | 20.6681 | 20.5461 | 21.2861 | 20.414  |
| SPANXB1  | 16.5466 | 17.9551 | 16.6319 | 16.668  | 18.1339 | 16.5986 |
| SPARC    | 22.0397 | 23.0447 | 22.8051 | 22.8943 | 22.2015 | 22.8812 |
| SPATA5   | 19.382  | 19.0275 | 18.8019 | 18.9389 | 19.2939 | 19.7151 |
| SPATA5L1 | 17.1885 | 16.4236 | 16.754  | 16.4265 | 17.3829 | 18.5922 |
| SPC25    | 18.2454 | 17.0756 | 16.9764 | 17.0122 | 17.4645 | 18.0169 |
| SPCS1    | 17.0948 | 17.8455 | 18.6087 | 18.9886 | 18.2119 | 18.3434 |
| SPCS2    | 21.2171 | 21.2341 | 21.5161 | 21.8071 | 21.2809 | 21.0151 |
| SPCS3    | 20.6607 | 21.8338 | 21.5737 | 21.814  | 21.8803 | 21.1322 |
| SPECC1   | 17.502  | 14.7941 | 18.0185 | 18.0387 | 15.1506 | 17.9601 |
| SPECC1L  | 20.0311 | 18.3708 | 19.3417 | 19.7388 | 18.1544 | 18.7717 |
| SPG20    | 18.5439 | 17.7803 | 17.9344 | 17.1219 | 18.622  | 18.9938 |
| SPINT1   | 10.9518 | 8.46163 | 7.81832 | 5.16006 | 10.0899 | 12.3916 |
| SPNS1    | 18.474  | 19.2154 | 18.3795 | 18.8504 | 18.1319 | 17.635  |
| SPPL2A   | 19.5452 | 19.7488 | 17.8618 | 17.6785 | 19.7321 | 18.2972 |
| SPR      | 17.6396 | 17.5852 | 19.1744 | 19.5752 | 17.0334 | 18.8274 |
| SPRYD4   | 18.9308 | 18.8968 | 18.6015 | 19.1578 | 18.3522 | 18.048  |
| SPRYD7   | 18.8068 | 18.7145 | 19.03   | 18.7206 | 18.7656 | 17.9356 |
| SPTAN1   | 24.3048 | 25.4863 | 24.9071 | 25.0684 | 25.6543 | 24.6418 |
| SPTBN1   | 23.952  | 25.387  | 24.8034 | 25.0155 | 25.4987 | 24.615  |
| SPTLC1   | 21.286  | 21.0594 | 21.0226 | 21.2529 | 20.9368 | 20.2433 |
| SPTLC2   | 16.5924 | 19.482  | 18.0483 | 18.0827 | 18.7979 | 18.219  |
| SQLE     | 17.7686 | 16.0432 | 17.1254 | 17.1913 | 16.8235 | 15.038  |
| SQRDL    | 24.0037 | 23.0759 | 23.633  | 23.2705 | 24.1049 | 21.5971 |
| SQSTM1   | 25.736  | 24.5902 | 25.6864 | 25.5037 | 25.2949 | 24.9824 |
| SRI      | 20.4886 | 19.9387 | 20.9741 | 20.891  | 20.1833 | 20.5752 |
| SRM      | 22.3415 | 21.4035 | 21.2194 | 20.9833 | 21.9126 | 22.7822 |
| SRP14    | 21.4746 | 21.5279 | 21.0373 | 21.6405 | 21.4441 | 21.3505 |
| SRP54    | 22.0577 | 22.0928 | 21.7825 | 21.305  | 22.2732 | 22.6523 |
| SRP68    | 22.7494 | 22.5085 | 22.1912 | 22.0101 | 22.8846 | 23.0956 |
| SRP72    | 22.482  | 22.2795 | 22.2869 | 22.175  | 22.4844 | 23.1427 |
| SRP9     | 21.2453 | 21.3531 | 21.5968 | 21.701  | 21.4198 | 21.6852 |
| SRPRA    | 19.7115 | 22.5635 | 21.2254 | 21.2647 | 22.9612 | 21.753  |

|         |         |         |         |         |         |         |
|---------|---------|---------|---------|---------|---------|---------|
| SRPRB   | 23.3621 | 24.0816 | 23.6874 | 23.6297 | 24.3948 | 23.3923 |
| SRR     | 17.1296 | 15.738  | 17.1357 | 16.894  | 13.4338 | 15.008  |
| SRRM1   | 20.8259 | 21.6799 | 21.6526 | 21.8822 | 21.6224 | 21.6592 |
| SRRM2   | 21.7183 | 21.1143 | 21.8453 | 22.2963 | 21.4501 | 21.4142 |
| SRRT    | 22.7115 | 22.7935 | 22.8543 | 22.8712 | 22.7374 | 22.5355 |
| SRSF1   | 24.9625 | 25.0967 | 25.4341 | 25.5435 | 25.2959 | 25.1006 |
| SRSF10  | 20.8197 | 20.7987 | 20.7444 | 20.9955 | 21.0797 | 21.0667 |
| SRSF11  | 20.2488 | 20.0704 | 20.577  | 20.712  | 20.0962 | 19.8636 |
| SRSF2   | 21.0768 | 21.2955 | 20.8562 | 21.0847 | 21.569  | 21.3791 |
| SRSF3   | 23.716  | 24.5421 | 24.0557 | 24.1216 | 24.4734 | 23.566  |
| SRSF5   | 21.8801 | 22.0037 | 22.1018 | 22.0755 | 22.3257 | 21.9427 |
| SRSF6   | 21.9755 | 22.6614 | 22.2026 | 22.652  | 22.8999 | 21.9518 |
| SRSF7   | 23.2075 | 23.4808 | 23.3874 | 23.5432 | 23.6801 | 23.4117 |
| SRSF9   | 22.9118 | 22.9837 | 23.5492 | 23.2948 | 23.0714 | 23.3104 |
| SSB     | 24.0597 | 24.1523 | 23.8334 | 23.6352 | 23.6531 | 24.3279 |
| SSBP1   | 22.2698 | 22.9907 | 22.9183 | 23.1064 | 23.3292 | 22.9898 |
| SSFA2   | 15.3323 | 15.9269 | 16.8697 | 16.7964 | 16.1748 | 14.5005 |
| SSR1    | 21.7176 | 22.6473 | 22.6666 | 23.0087 | 22.5384 | 22.3503 |
| SSR3    | 20.1754 | 21.1642 | 20.8489 | 21.3344 | 21.3525 | 20.5764 |
| SSR4    | 23.7108 | 24.472  | 24.5203 | 24.7541 | 24.4243 | 24.0207 |
| SSRP1   | 24.1492 | 24.5596 | 24.3632 | 24.2129 | 24.7351 | 24.4885 |
| ST13P4  | 23.3593 | 22.3722 | 23.0624 | 22.8415 | 22.4632 | 23.1299 |
| ST3GAL1 | 14.1099 | 16.2656 | 17.9326 | 18.0427 | 18.3938 | 14.0161 |
| STAG1   | 18.0229 | 18.0224 | 18.0204 | 17.7573 | 18.4408 | 17.9093 |
| STAG2   | 19.2311 | 19.1187 | 20.0008 | 19.8289 | 19.2748 | 19.1659 |
| STARD9  | 17.1069 | 16.5499 | 16.7222 | 15.3029 | 17.1246 | 16.0766 |
| STAT1   | 24.4334 | 23.8905 | 23.0589 | 22.8225 | 23.5839 | 23.9463 |
| STAT2   | 15.6824 | 16.9894 | 15.6537 | 15.1123 | 15.0685 | 13.9721 |
| STAT3   | 22.212  | 21.476  | 21.7432 | 21.6314 | 21.4827 | 22.895  |
| STAU1   | 20.9781 | 19.9611 | 21.5868 | 21.6584 | 20.5189 | 21.8394 |
| STEAP2  | 14.5951 | 17.0063 | 14.5749 | 14.4519 | 18.1745 | 14.1015 |
| STEAP3  | 17.5744 | 21.1462 | 18.7401 | 18.6563 | 21.146  | 17.7336 |
| STIM1   | 19.5646 | 18.177  | 19.3827 | 19.4437 | 18.4242 | 18.1515 |
| STIP1   | 24.6827 | 24.0908 | 24.656  | 24.52   | 24.4725 | 25.1242 |
| STK24   | 18.7756 | 18.0762 | 18.4098 | 18.6756 | 16.4491 | 17.6118 |
| STMN1   | 22.5393 | 22.2227 | 21.2656 | 20.9587 | 22.5048 | 22.5114 |
| STOM    | 22.4708 | 20.8936 | 19.7616 | 20.2504 | 20.787  | 19.696  |
| STOML2  | 22.5539 | 22.5562 | 22.5237 | 22.796  | 22.362  | 23.5853 |
| STRA6   | 15.4628 | 14.9809 | 20.7629 | 20.57   | 15.8635 | 16.6251 |
| STRAP   | 23.9324 | 23.6139 | 23.8001 | 23.7886 | 23.8252 | 24.7195 |
| STRN    | 19.6641 | 19.577  | 18.6611 | 18.4922 | 19.9698 | 19.8616 |
| STT3A   | 22.2119 | 23.3987 | 23.2149 | 23.3423 | 23.6871 | 21.8995 |
| STT3B   | 20.565  | 21.8804 | 21.4592 | 21.4299 | 22.1548 | 21.1594 |
| STX12   | 20.7878 | 21.1315 | 20.2789 | 20.1207 | 21.5773 | 20.7523 |
| STX16   | 16.7319 | 17.1045 | 17.3257 | 17.665  | 16.76   | 17.734  |
| STX18   | 17.8255 | 17.6445 | 17.3521 | 17.0979 | 16.8147 | 15.3092 |
| STX6    | 19.2363 | 19.1316 | 19.6298 | 18.6471 | 18.856  | 19.9513 |
| STX7    | 19.1825 | 20.2617 | 19.1764 | 19.7424 | 20.3082 | 21.1115 |
| STXBP1  | 20.3074 | 20.2765 | 19.7744 | 19.3904 | 20.8869 | 18.5907 |
| STXBP2  | 16.5112 | 15.8149 | 15.766  | 15.893  | 16.2559 | 19.157  |
| STXBP3  | 20.6587 | 20.3151 | 20.4167 | 20.1619 | 20.699  | 19.7607 |
| SUB1    | 21.2123 | 21.1063 | 21.2027 | 21.0648 | 21.7905 | 22.1249 |

|         |         |         |         |         |         |         |
|---------|---------|---------|---------|---------|---------|---------|
| SUCLA2  | 22.4761 | 21.6765 | 22.4457 | 22.496  | 21.9487 | 21.9556 |
| SUCLG1  | 23.0539 | 23.0702 | 22.8904 | 22.9741 | 23.3247 | 22.7507 |
| SUCLG2  | 22.3176 | 22.5298 | 21.7666 | 21.9419 | 22.8326 | 21.8948 |
| SUDS3   | 16.7303 | 16.8998 | 17.0429 | 17.1603 | 16.8337 | 16.3497 |
| SUGP1   | 15.8827 | 15.5579 | 17.0609 | 16.6274 | 16.5186 | 17.0159 |
| SUGP2   | 16.4558 | 15.7314 | 17.6775 | 17.6247 | 16.1774 | 17.6182 |
| SUGT1   | 21.8795 | 21.2439 | 21.596  | 21.1335 | 21.7795 | 22.0807 |
| SUMF2   | 20.863  | 22.3242 | 20.7724 | 21.149  | 21.2303 | 20.573  |
| SUMO1   | 20.0727 | 20.6067 | 20.4899 | 20.6149 | 20.8983 | 21.2574 |
| SUN1    | 17.6719 | 17.038  | 17.9066 | 17.631  | 17.592  | 16.6602 |
| SUN2    | 22.2922 | 22.6558 | 22.2545 | 22.3776 | 22.1771 | 21.9003 |
| SUPT16H | 24.0608 | 24.3477 | 23.9093 | 23.7142 | 24.573  | 24.3457 |
| SUPT5H  | 20.934  | 21.1738 | 21.0683 | 21.0155 | 21.108  | 20.613  |
| SUPT6H  | 19.6064 | 20.1509 | 20.1671 | 20.1352 | 19.5258 | 18.8595 |
| SUPV3L1 | 18.8958 | 18.985  | 19.1086 | 19.0413 | 19.7141 | 19.723  |
| SURF1   | 16.9419 | 16.1837 | 18.2313 | 18.2811 | 14.443  | 16.8029 |
| SURF4   | 21.9884 | 22.244  | 22.3199 | 21.8496 | 21.2245 | 20.6139 |
| SUSD2   | 14.2351 | 14.2489 | 20.8173 | 20.1871 | 14.8097 | 14.9508 |
| SVIL    | 15.4066 | 17.5342 | 15.0311 | 14.6742 | 17.0831 | 15.3533 |
| SWAP70  | 20.0496 | 19.0452 | 18.872  | 18.8226 | 19.7051 | 19.5587 |
| SYMPK   | 18.4731 | 19.623  | 19.9927 | 20.024  | 19.1108 | 19.5759 |
| SYNCRIP | 25.4914 | 25.4134 | 25.1449 | 25.0866 | 25.4423 | 26.0465 |
| SYNJ2BP | 19.7929 | 19.7455 | 19.5715 | 19.5266 | 20.0957 | 19.0982 |
| SYNM    | 24.7007 | 23.3011 | 23.5355 | 22.7406 | 22.8602 | 24.2093 |
| SYNPO   | 21.4626 | 22.4459 | 20.8745 | 20.9354 | 22.8372 | 20.3728 |
| SYPL1   | 23.4841 | 23.393  | 22.942  | 22.71   | 23.5994 | 22.4887 |
| TAB1    | 18.2737 | 17.1449 | 16.9408 | 16.8085 | 17.6035 | 17.4628 |
| TACC1   | 20.1865 | 18.353  | 19.9944 | 19.306  | 18.8677 | 18.8163 |
| TACO1   | 20.9304 | 20.9569 | 21.3259 | 21.5016 | 21.0933 | 21.3718 |
| TAF15   | 21.1235 | 22.087  | 20.3401 | 21.3733 | 21.9312 | 21.3118 |
| TAF6    | 17.166  | 17.6348 | 18.3711 | 18.8313 | 16.7218 | 17.7416 |
| TAGLN   | 19.1951 | 19.3609 | 18.5209 | 17.9853 | 19.305  | 18.8274 |
| TAGLN2  | 25.3891 | 24.5019 | 24.5156 | 24.3801 | 24.5632 | 25.4487 |
| TALDO1  | 26.1435 | 24.2931 | 25.6807 | 25.462  | 24.8316 | 24.8755 |
| TAMM41  | 16.2159 | 17.7857 | 16.7542 | 17.7271 | 17.3445 | 18.5847 |
| TAP1    | 20.0048 | 19.2408 | 19.8472 | 20.1628 | 19.1014 | 18.1633 |
| TAP2    | 19.9651 | 18.7835 | 19.3643 | 19.489  | 18.9845 | 18.0936 |
| TAPBP   | 20.4973 | 20.462  | 20.11   | 20.8724 | 20.3108 | 19.401  |
| TAPBPL  | 16.9667 | 17.7143 | 17.5326 | 17.1709 | 18.0391 | 14.9814 |
| TARDBP  | 22.8268 | 23.1731 | 23.1333 | 23.308  | 22.5335 | 22.875  |
| TARS    | 23.8696 | 22.7729 | 23.3198 | 22.8255 | 23.5171 | 24.6329 |
| TARS2   | 20.331  | 20.2954 | 20.1812 | 20.3151 | 21.0924 | 21.1652 |
| TAX1BP1 | 17.6425 | 16.0647 | 16.3338 | 15.3442 | 17.2492 | 15.3225 |
| TBC1D13 | 18.197  | 18.2985 | 17.4858 | 18.102  | 18.2479 | 19.247  |
| TBC1D15 | 19.0237 | 16.7496 | 17.0334 | 16.1865 | 18.2222 | 18.0132 |
| TBC1D17 | 18.5181 | 17.8879 | 19.1653 | 18.971  | 18.5524 | 19.1155 |
| TBC1D23 | 18.553  | 19.3001 | 18.6184 | 18.5411 | 19.3704 | 17.9112 |
| TBC1D9B | 17.8032 | 17.9868 | 16.8213 | 16.2722 | 17.8112 | 17.3781 |
| TBCB    | 21.6922 | 20.655  | 19.6486 | 19.6993 | 21.2631 | 21.8043 |
| TBCD    | 19.3218 | 19.1421 | 19.9155 | 19.4938 | 19.7561 | 20.4507 |
| TBCE    | 19.139  | 19.1893 | 19.2361 | 18.6456 | 18.4949 | 19.0551 |
| TBK1    | 18.0677 | 17.0714 | 17.6512 | 17.3126 | 18.0994 | 18.7265 |



|         |         |         |         |         |         |         |
|---------|---------|---------|---------|---------|---------|---------|
| TBL1XR1 | 22.4043 | 22.1476 | 22.6035 | 22.6461 | 22.3357 | 22.4335 |
| TBL2    | 20.8724 | 21.4074 | 21.3475 | 21.5633 | 21.6682 | 21.3059 |
| TBL3    | 22.0437 | 22.7831 | 23.4223 | 23.2803 | 22.7997 | 23.3725 |
| TBRG4   | 19.4213 | 20.4542 | 21.2606 | 21.4682 | 19.7722 | 20.5757 |
| TBXAS1  | 16.1769 | 15.0854 | 17.6938 | 17.7103 | 14.1053 | 13.2544 |
| TCAF1   | 17.7201 | 18.7445 | 19.3019 | 18.9058 | 18.8307 | 18.4809 |
| TCEA1   | 21.4611 | 20.5108 | 21.0755 | 20.8749 | 21.1403 | 21.1455 |
| TCEB1   | 20.9448 | 20.3256 | 20.4062 | 20.5084 | 20.665  | 20.8425 |
| TCEB2   | 21.3377 | 20.8811 | 20.81   | 20.6641 | 21.225  | 21.1588 |
| TCERG1  | 21.5532 | 21.9924 | 21.9229 | 22.0542 | 22.1556 | 21.4862 |
| TCF25   | 18.0176 | 18.3091 | 18.1364 | 19.0087 | 16.8186 | 17.0132 |
| TCIRG1  | 17.8141 | 18.4705 | 18.1548 | 17.7976 | 18.046  | 14.199  |
| TCOF1   | 18.9017 | 17.2807 | 19.5877 | 19.8829 | 17.6525 | 19.568  |
| TCP1    | 25.8888 | 25.4323 | 25.6635 | 25.6519 | 25.3343 | 26.3348 |
| TCP11L1 | 16.0992 | 14.7754 | 14.5527 | 14.3435 | 17.1415 | 14.5309 |
| TCTN3   | 13.9133 | 11.7753 | 15.2057 | 14.7632 | 8.29861 | 12.6451 |
| TECR    | 21.8058 | 21.989  | 22.2114 | 22.2673 | 21.8477 | 22.4903 |
| TELO2   | 14.0901 | 15.178  | 16.9333 | 16.1787 | 15.0665 | 16.3373 |
| TERF2   | 14.9672 | 16.0062 | 15.6896 | 15.4622 | 16.991  | 15.5373 |
| TEX10   | 12.5406 | 17.8047 | 17.0518 | 16.9449 | 17.7889 | 17.0341 |
| TEX264  | 19.3279 | 19.347  | 18.6875 | 18.8852 | 19.57   | 18.8148 |
| TF      | 23.4864 | 21.1333 | 23.0833 | 22.6902 | 20.558  | 22.67   |
| TFB1M   | 18.1498 | 18.3644 | 19.1652 | 18.9618 | 18.5814 | 20.0077 |
| TFCP2   | 19.5353 | 18.8167 | 18.8823 | 18.9428 | 19.2316 | 19.4991 |
| TFG     | 21.1135 | 20.6994 | 20.7497 | 20.3769 | 21.2971 | 21.2929 |
| TFIP11  | 15.9613 | 14.8954 | 16.7315 | 17.3018 | 14.8973 | 17.0987 |
| TFRC    | 25.4947 | 25.7689 | 27.0681 | 26.8373 | 26.0083 | 27.1344 |
| TGFB1   | 19.4404 | 17.5174 | 18.3328 | 18.538  | 16.8096 | 17.7026 |
| TGFB1I1 | 18.2818 | 19.0852 | 16.5487 | 15.9624 | 20.2032 | 14.6608 |
| TGFBI   | 21.6764 | 22.6866 | 22.5929 | 22.6851 | 21.2575 | 22.66   |
| TGM2    | 20.4146 | 22.6634 | 19.9321 | 20.1008 | 23.0883 | 20.0751 |
| THBS1   | 21.4238 | 22.2624 | 21.6616 | 21.5756 | 21.7216 | 20.5503 |
| THBS2   | 20.1597 | 19.0109 | 19.7257 | 19.7162 | 19.9089 | 20.2364 |
| THEM6   | 17.366  | 17.8452 | 19.3633 | 19.5417 | 18.1583 | 17.4663 |
| THG1L   | 16.0942 | 16.9761 | 17.0315 | 17.0094 | 16.3655 | 17.7703 |
| THOC1   | 19.6774 | 20.6687 | 20.7196 | 20.8357 | 20.9136 | 20.119  |
| THOC2   | 20.2389 | 21.0739 | 21.2728 | 21.3494 | 20.9056 | 20.7937 |
| THOC3   | 22.6474 | 19.1615 | 22.828  | 22.3039 | 19.4819 | 20.2986 |
| THOC5   | 19.36   | 20.1422 | 19.9306 | 20.1241 | 20.0041 | 19.2301 |
| THOC6   | 20.4802 | 20.9456 | 20.5907 | 20.9282 | 20.446  | 20.8224 |
| THOP1   | 20.9807 | 20.4863 | 20.1066 | 19.9622 | 20.65   | 21.3024 |
| THRAP3  | 21.8314 | 21.7145 | 21.9999 | 22.3209 | 22.1447 | 21.799  |
| THUMPD1 | 19.2872 | 18.7643 | 18.112  | 17.8592 | 18.4814 | 18.3114 |
| THUMPD3 | 16.0409 | 16.3336 | 16.0615 | 14.8112 | 14.2059 | 16.204  |
| THY1    | 21.3595 | 23.3702 | 24.2212 | 24.3681 | 22.7452 | 22.4746 |
| TIA1    | 19.5771 | 19.4434 | 18.9526 | 19.089  | 19.3971 | 19.1386 |
| TIAL1   | 21.3416 | 21.999  | 21.2951 | 21.5611 | 21.7811 | 21.7343 |
| TIGAR   | 17.6836 | 16.5896 | 16.2999 | 16.3252 | 16.2533 | 16.8878 |
| TIMM17B | 18.7933 | 18.5394 | 19.1977 | 19.3116 | 19.3115 | 19.6277 |
| TIMM21  | 16.9295 | 17.8918 | 18.1944 | 18.2375 | 18.3344 | 18.3823 |
| TIMM22  | 18.3434 | 18.1708 | 18.4251 | 18.3746 | 17.9786 | 17.9994 |
| TIMM23  | 18.808  | 18.8836 | 19.6604 | 19.9537 | 18.6026 | 19.3665 |

|          |         |         |         |         |         |         |
|----------|---------|---------|---------|---------|---------|---------|
| TIMM44   | 22.0065 | 21.7657 | 22.2839 | 22.5367 | 21.8857 | 22.7413 |
| TIMM50   | 22.1976 | 21.7162 | 22.4351 | 22.4768 | 21.7106 | 22.2355 |
| TIMMDC1  | 13.1702 | 15.8702 | 17.4521 | 16.8605 | 14.3607 | 16.9053 |
| TIMP3    | 20.322  | 17.3381 | 19.5918 | 19.2661 | 16.0453 | 16.6916 |
| TIPRL    | 20.2073 | 19.4836 | 19.3742 | 19.0762 | 19.5798 | 20.278  |
| TJP1     | 21.2621 | 20.7268 | 21.4032 | 21.2301 | 21.2871 | 19.68   |
| TJP2     | 17.9337 | 17.9541 | 18.4293 | 17.8999 | 18.4755 | 14.7848 |
| TK1      | 19.7546 | 17.0509 | 19.8392 | 19.6146 | 16.2695 | 19.3491 |
| TKT      | 28.2375 | 26.4832 | 27.2023 | 27.048  | 26.4849 | 29.3771 |
| TLN1     | 26.1029 | 26.0603 | 24.8398 | 24.9345 | 26.5289 | 26.0533 |
| TM9SF2   | 21.8995 | 22.4731 | 22.1883 | 22.1922 | 22.4248 | 21.9435 |
| TM9SF3   | 22.0068 | 22.5416 | 22.2625 | 22.1372 | 22.7984 | 22.0524 |
| TM9SF4   | 21.5729 | 21.9669 | 21.7531 | 21.9435 | 21.7105 | 21.1825 |
| TMCO1    | 20.4836 | 20.486  | 21.274  | 21.6762 | 20.5267 | 20.5856 |
| TMED10   | 23.2838 | 23.3467 | 22.8795 | 23.1836 | 23.6558 | 22.8471 |
| TMED2    | 20.8378 | 20.8827 | 20.0492 | 20.6999 | 21.0179 | 20.185  |
| TMED4    | 18.9308 | 19.5443 | 19.132  | 19.184  | 19.725  | 19.0967 |
| TMED7    | 22.6519 | 22.7924 | 22.7298 | 22.7325 | 23.0998 | 22.2035 |
| TMED9    | 20.0797 | 21.613  | 19.9553 | 20.3525 | 21.808  | 20.0256 |
| TMEM106B | 16.9202 | 18.3166 | 17.2115 | 17.3946 | 17.8838 | 15.8648 |
| TMEM109  | 21.7014 | 22.7924 | 22.8311 | 22.9063 | 22.8887 | 21.7378 |
| TMEM11   | 19.645  | 19.9506 | 20.505  | 20.7104 | 20.11   | 20.1733 |
| TMEM126A | 17.8881 | 17.5158 | 18.7055 | 18.998  | 17.493  | 17.2938 |
| TMEM132A | 14.2257 | 18.7307 | 17.9712 | 17.6898 | 19.5807 | 14.6955 |
| TMEM14C  | 18.6965 | 19.204  | 20.4908 | 20.1907 | 18.4611 | 17.7703 |
| TMEM165  | 20.7091 | 22.2441 | 20.5569 | 20.327  | 22.8281 | 21.575  |
| TMEM167A | 21.0558 | 21.7343 | 21.5887 | 21.357  | 22.1061 | 20.5281 |
| TMEM189  | 19.6356 | 20.6389 | 19.565  | 19.1499 | 20.5784 | 19.6345 |
| TMEM192  | 18.5736 | 18.6024 | 18.785  | 18.5292 | 18.3928 | 17.6522 |
| TMEM2    | 17.9923 | 18.9821 | 18.3485 | 18.5158 | 18.6691 | 20.0075 |
| TMEM214  | 17.9925 | 20.4414 | 19.5912 | 19.3863 | 20.9821 | 20.5274 |
| TMEM245  | 16.7252 | 16.7594 | 17.4987 | 17.4716 | 17.6931 | 15.8016 |
| TMEM33   | 21.0006 | 20.8518 | 21.2439 | 20.9707 | 21.0543 | 21.5295 |
| TMEM43   | 22.9915 | 23.5557 | 23.2698 | 23.1785 | 23.7325 | 21.2438 |
| TMEM55B  | 18.6191 | 19.3403 | 17.3495 | 17.9921 | 19.1472 | 17.2611 |
| TMEM56   | 13.7498 | 11.2237 | 12.4984 | 11.6137 | 15.1779 | 13.1691 |
| TMEM87A  | 20.091  | 19.9482 | 19.7565 | 19.7661 | 19.9634 | 19.9659 |
| TMEM97   | 19.0498 | 19.8524 | 19.8368 | 20.3443 | 20.3326 | 19.9621 |
| TMF1     | 15.2886 | 16.0753 | 16.9319 | 16.8287 | 16.436  | 13.9312 |
| TMLHE    | 17.0811 | 16.9114 | 16.4031 | 17.3903 | 16.5997 | 17.3539 |
| TMOD3    | 21.9624 | 21.6072 | 21.0013 | 21.0034 | 21.7434 | 21.4018 |
| TMPO     | 22.8233 | 21.442  | 22.5413 | 22.6599 | 21.6402 | 21.9922 |
| TMPO     | 22.5492 | 22.3305 | 21.6322 | 21.7643 | 22.7812 | 21.4114 |
| TMTC3    | 17.9947 | 18.6229 | 18.1085 | 17.649  | 18.0642 | 17.0736 |
| TMUB1    | 17.9448 | 18.3776 | 18.1706 | 17.7391 | 18.5855 | 19.1942 |
| TMX1     | 23.5402 | 23.5274 | 22.9305 | 23.2058 | 23.6454 | 23.715  |
| TMX2     | 20.1825 | 20.0205 | 21.146  | 20.9952 | 19.5173 | 20.8031 |
| TMX3     | 21.9509 | 21.3645 | 21.028  | 21.0068 | 21.8098 | 20.2629 |
| TMX4     | 20.6305 | 20.1037 | 20.0157 | 20.0324 | 19.8922 | 19.1031 |
| TNC      | 21.8162 | 24.4207 | 19.9042 | 19.9442 | 23.5283 | 21.8575 |
| TNFAIP2  | 18.3833 | 19.9895 | 18.0107 | 17.6324 | 19.2485 | 18.7113 |
| TNFAIP8  | 13.2557 | 17.4085 | 15.5311 | 15.4766 | 17.3112 | 14.3613 |

|           |         |         |         |         |         |         |
|-----------|---------|---------|---------|---------|---------|---------|
| TNFRSF10B | 17.9559 | 19.7733 | 19.4385 | 19.8999 | 18.801  | 17.7124 |
| TNFRSF11B | 13.8919 | 15.405  | 19.2875 | 19.4005 | 12.3178 | 11.9596 |
| TNKS1BP1  | 19.5528 | 19.1884 | 18.8622 | 18.8746 | 19.4658 | 18.4396 |
| TNPO1     | 23.8659 | 24.1832 | 24.218  | 24.0697 | 24.3489 | 24.5205 |
| TNPO2     | 18.1903 | 16.4305 | 16.3457 | 16.1207 | 16.1381 | 18.3664 |
| TNPO3     | 22.3475 | 20.9915 | 21.4552 | 20.9736 | 20.9317 | 21.7057 |
| TNS3      | 23.5329 | 21.8635 | 22.7666 | 22.5574 | 21.9271 | 21.3493 |
| TOE1      | 18.4836 | 18.5958 | 19.4718 | 19.9915 | 18.7126 | 19.1059 |
| TOLLIP    | 20.8439 | 20.6406 | 20.1339 | 20.1947 | 20.3775 | 19.4638 |
| TOM1      | 20.0768 | 20.613  | 18.8912 | 18.9821 | 20.6597 | 18.0727 |
| TOMM22    | 19.8203 | 20.278  | 21.2687 | 21.5459 | 19.5033 | 19.5399 |
| TOMM34    | 20.4797 | 20.6392 | 21.9498 | 21.8914 | 21.089  | 22.6192 |
| TOMM40    | 22.9599 | 22.9938 | 23.8473 | 23.9795 | 22.8865 | 23.6311 |
| TOMM5     | 18.1472 | 18.6934 | 18.2482 | 17.7547 | 18.7329 | 17.3587 |
| TOMM7     | 19.6375 | 19.8907 | 19.8221 | 19.8401 | 20.5489 | 19.6286 |
| TOMM70A   | 22.2744 | 22.2003 | 22.7542 | 22.8945 | 22.4353 | 22.4467 |
| TOP1      | 18.5208 | 19.6911 | 19.1933 | 19.0296 | 19.9892 | 20.3235 |
| TOP2A     | 20.1152 | 19.8207 | 20.8335 | 20.4456 | 20.2753 | 20.4265 |
| TOP2B     | 15.9166 | 19.5244 | 16.9756 | 16.9072 | 19.3697 | 17.1501 |
| TOR1A     | 18.3122 | 18.4185 | 18.3805 | 18.2863 | 17.8008 | 17.5083 |
| TOR1AIP1  | 23.0388 | 22.7539 | 22.8554 | 22.7876 | 22.97   | 22.8728 |
| TOR1AIP2  | 19.7233 | 19.9944 | 20.0609 | 20.0492 | 20.2244 | 20.3749 |
| TOR1B     | 19.8682 | 18.9059 | 18.9828 | 19.1634 | 18.4318 | 19.1475 |
| TOR3A     | 17.0957 | 15.8654 | 17.594  | 17.4037 | 15.6476 | 15.3663 |
| TP53      | 16.1373 | 15.553  | 18.972  | 19.756  | 14.8195 | 18.5309 |
| TP53BP1   | 23.2146 | 23.3456 | 22.7376 | 22.5617 | 23.9807 | 23.1136 |
| TP53I11   | 20.6411 | 16.5694 | 17.7398 | 17.6773 | 17.2621 | 17.6607 |
| TP53I3    | 19.1919 | 18.6941 | 15.8268 | 16.0941 | 19.4213 | 16.6483 |
| TPD52     | 15.9538 | 9.8538  | 13.8737 | 13.645  | 13.6661 | 19.4694 |
| TPD52L2   | 20.1319 | 20.8036 | 20.7817 | 20.9255 | 20.7497 | 21.7916 |
| TPI1      | 28.1696 | 26.643  | 26.7956 | 26.6636 | 26.7344 | 27.7937 |
| TPM1      | 18.7436 | 18.5015 | 18.4829 | 17.8169 | 18.6966 | 17.1492 |
| TPM3      | 21.7123 | 21.067  | 21.3901 | 21.2088 | 21.6781 | 21.0297 |
| TPM4      | 22.7445 | 22.0538 | 21.7559 | 21.0967 | 22.5113 | 20.1748 |
| TPP1      | 22.2625 | 24.2169 | 21.61   | 22.2546 | 23.8109 | 19.8111 |
| TPP2      | 23.0158 | 22.0437 | 22.7944 | 22.3884 | 22.6196 | 21.8941 |
| TPR       | 23.351  | 23.52   | 23.7017 | 23.9321 | 23.7259 | 23.2056 |
| TPRKB     | 18.885  | 18.0663 | 17.5044 | 17.5557 | 18.0044 | 18.0492 |
| TPT1      | 21.5304 | 20.4628 | 20.4585 | 21.1774 | 21.1818 | 22.2882 |
| TPX2      | 18.111  | 12.6571 | 18.5583 | 18.4746 | 14.1148 | 17.7331 |
| TRA2A     | 21.7176 | 22.1832 | 22.132  | 22.0663 | 22.0274 | 21.1588 |
| TRA2B     | 23.5085 | 23.9035 | 23.8369 | 24.1322 | 23.2447 | 23.3305 |
| TRAP1     | 23.0324 | 22.8697 | 24.1151 | 24.4273 | 23.1691 | 23.2939 |
| TRIM16    | 21.9879 | 20.6789 | 21.5039 | 21.0942 | 20.5573 | 21.9013 |
| TRIM22    | 18.5017 | 19.1336 | 18.9023 | 18.7798 | 19.3008 | 14.358  |
| TRIM24    | 14.986  | 13.8343 | 16.0502 | 15.1089 | 13.46   | 14.2556 |
| TRIM25    | 22.4118 | 21.5892 | 21.8591 | 21.4182 | 21.8734 | 22.4028 |
| TRIM27    | 16.1762 | 17.0116 | 17.7502 | 17.5962 | 17.4061 | 16.3916 |
| TRIM28    | 24.9608 | 24.4248 | 24.8526 | 24.9949 | 24.3693 | 24.937  |
| TRIM3     | 17.9747 | 17.6222 | 16.5218 | 15.9242 | 17.7118 | 16.1878 |
| TRIM47    | 19.956  | 16.5508 | 17.3919 | 16.7673 | 16.0837 | 18.7232 |
| TRIO      | 18.0656 | 19.1206 | 17.7859 | 17.5609 | 19.8247 | 18.2556 |

|         |         |         |         |         |         |         |
|---------|---------|---------|---------|---------|---------|---------|
| TRIOBP  | 20.4901 | 19.9011 | 19.1448 | 19.1443 | 20.0016 | 17.9917 |
| TRIP10  | 18.5581 | 19.6625 | 18.8349 | 18.2557 | 19.5262 | 18.2831 |
| TRIP11  | 18.1232 | 18.3059 | 17.6373 | 17.4652 | 18.2481 | 15.9706 |
| TRIP12  | 19.0298 | 21.2653 | 20.5148 | 20.3504 | 21.5349 | 20.2532 |
| TRIP13  | 20.9656 | 19.8082 | 20.1879 | 20.1987 | 20.3523 | 22.1846 |
| TRIP4   | 18.2082 | 17.5317 | 17.5597 | 16.8183 | 18.2351 | 18.3516 |
| TRIP6   | 22.285  | 20.8372 | 20.4798 | 20.2495 | 20.9712 | 22.428  |
| TRMT1   | 15.9565 | 17.5179 | 16.139  | 15.4281 | 17.5204 | 17.9279 |
| TRMT10C | 21.4745 | 22.1039 | 21.9269 | 22.0674 | 22.343  | 22.5622 |
| TRMT112 | 16.7677 | 16.716  | 17.9693 | 17.6696 | 16.1619 | 18.1822 |
| TRMT1L  | 15.7567 | 17.2888 | 16.5503 | 16.6461 | 16.8497 | 16.3236 |
| TRMT6   | 18.8192 | 18.5287 | 18.4448 | 18.6719 | 19.0106 | 19.1432 |
| TRMT61A | 18.135  | 18.5458 | 18.2081 | 18.0684 | 18.3232 | 19.1447 |
| TRMU    | 14.9804 | 16.1658 | 16.8818 | 17.6493 | 16.1011 | 15.508  |
| TRNT1   | 19.3026 | 20.2989 | 18.6604 | 18.9135 | 20.3871 | 20.0136 |
| TROVE2  | 21.1983 | 20.7681 | 19.4895 | 19.5274 | 20.8643 | 21.2139 |
| TRRAP   | 13.0431 | 13.8756 | 15.8594 | 16.1413 | 14.5111 | 14.6574 |
| TSFM    | 20.6744 | 20.5054 | 21.3407 | 21.3707 | 21.0694 | 20.7814 |
| TSG101  | 20.419  | 20.7458 | 19.7777 | 19.665  | 20.7927 | 20.817  |
| TSN     | 21.1829 | 21.2012 | 20.8051 | 20.4764 | 21.5485 | 21.2812 |
| TSPAN4  | 17.837  | 20.6419 | 20.6762 | 20.7475 | 19.205  | 16.5583 |
| TSPYL1  | 12.4614 | 12.0208 | 13.9213 | 11.3773 | 12.7535 | 13.5357 |
| TSR1    | 17.3341 | 18.0975 | 19.075  | 18.768  | 18.5663 | 19.9164 |
| TSSC1   | 17.9486 | 16.6599 | 16.3887 | 15.9523 | 17.0638 | 18.4894 |
| TST     | 20.8011 | 21.1919 | 22.2192 | 22.1911 | 21.4335 | 19.0744 |
| TTC1    | 18.74   | 17.5408 | 19.054  | 18.5205 | 18.4226 | 19.4677 |
| TTC37   | 16.9245 | 16.0377 | 17.4747 | 17.2532 | 16.717  | 16.9683 |
| TTC4    | 18.8084 | 18.2791 | 18.9894 | 19.2019 | 18.7945 | 19.4839 |
| TTI1    | 16.4108 | 16.4558 | 18.2903 | 18.0476 | 16.7675 | 17.5265 |
| TTI2    | 15.1784 | 15.5052 | 16.2137 | 16.0272 | 14.1674 | 15.1738 |
| TTLL12  | 22.5409 | 21.4162 | 22.3332 | 21.9833 | 21.2529 | 23.1544 |
| TTN     | 21.0295 | 21.3474 | 20.0929 | 20.9471 | 21.8087 | 21.426  |
| TTYH3   | 17.5335 | 21.9875 | 16.2063 | 18.3983 | 20.9292 | 15.9511 |
| TUBA1C  | 22.8221 | 21.4457 | 21.5679 | 21.8923 | 21.7908 | 23.7836 |
| TUBA3D  | 18.9471 | 19.8234 | 18.4517 | 18.1849 | 20.4043 | 19.1002 |
| TUBA4A  | 22.5387 | 21.6256 | 22.6953 | 22.1598 | 21.9783 | 20.9116 |
| TUBAL3  | 19.6521 | 16.0138 | 18.1707 | 19.0058 | 16.7511 | 20.38   |
| TUBB    | 27.4319 | 26.2109 | 25.9919 | 25.7548 | 26.5965 | 27.5028 |
| TUBB2A  | 21.1945 | 17.7411 | 16.2216 | 15.8586 | 18.3984 | 20.6984 |
| TUBB2B  | 18.2087 | 16.8219 | 16.3737 | 16.1819 | 17.8649 | 18.966  |
| TUBB3   | 22.168  | 20.8404 | 20.7829 | 20.7851 | 20.7384 | 21.6114 |
| TUBB6   | 20.4904 | 23.3589 | 20.1061 | 19.9796 | 23.5155 | 21.7614 |
| TUBG1   | 19.8101 | 19.2366 | 20.0168 | 19.7458 | 19.7095 | 20.1373 |
| TUBGCP2 | 18.1047 | 17.3405 | 18.0361 | 17.1043 | 17.6369 | 18.4707 |
| TUFM    | 25.8254 | 25.1213 | 25.6635 | 25.9971 | 25.1828 | 26.0669 |
| TWF1    | 22.4445 | 21.8909 | 21.9005 | 21.7049 | 22.254  | 22.26   |
| TWF2    | 22.3905 | 22.6974 | 22.2261 | 21.8565 | 23.3292 | 23.4706 |
| TXLNA   | 22.1658 | 22.429  | 22.3295 | 21.748  | 22.5802 | 23.1912 |
| TXN     | 23.9006 | 21.0726 | 22.977  | 22.6314 | 21.8412 | 22.5493 |
| TXNDC12 | 19.222  | 19.2685 | 20.2756 | 20.4908 | 18.7938 | 20.0651 |
| TXNDC17 | 20.9694 | 20.0086 | 20.4953 | 20.4931 | 20.3601 | 22.4899 |
| TXNDC5  | 25.5212 | 25.3852 | 25.3201 | 25.6622 | 25.0304 | 25.6555 |

|         |         |         |         |         |         |         |
|---------|---------|---------|---------|---------|---------|---------|
| TXNDC9  | 18.5318 | 18.6015 | 19.0535 | 18.9703 | 18.8924 | 18.8614 |
| TXNL1   | 23.6289 | 22.4195 | 22.3327 | 22.0232 | 23.0695 | 22.1305 |
| TXNL4A  | 14.6257 | 16.3353 | 16.921  | 16.7138 | 14.0544 | 14.5163 |
| TXNRD1  | 26.0397 | 23.889  | 23.7741 | 23.6086 | 24.5654 | 23.547  |
| TXNRD2  | 18.2765 | 18.5596 | 17.2863 | 17.6348 | 18.0278 | 15.932  |
| TYMS    | 20.0106 | 18.0664 | 19.5727 | 19.4041 | 18.0772 | 21.2127 |
| U2AF1   | 21.6455 | 21.5274 | 20.9157 | 21.2993 | 21.7338 | 21.5989 |
| U2AF2   | 24.4482 | 24.1826 | 24.371  | 24.3641 | 23.9558 | 24.6639 |
| U2SURP  | 21.0487 | 21.7802 | 21.7652 | 21.6327 | 21.7847 | 21.6736 |
| UACA    | 18.8309 | 17.7931 | 19.0094 | 18.8631 | 17.8985 | 17.3716 |
| UAP1    | 20.8752 | 21.0896 | 20.051  | 19.9366 | 21.507  | 22.758  |
| UAP1L1  | 20.4394 | 18.0658 | 17.3788 | 17.3264 | 16.9513 | 17.8271 |
| UBA1    | 26.6273 | 25.3058 | 25.4007 | 25.1039 | 25.5492 | 25.426  |
| UBA2    | 23.3442 | 22.5999 | 22.198  | 22.3932 | 22.6895 | 23.6748 |
| UBA3    | 21.117  | 20.6275 | 20.4823 | 19.9524 | 20.8591 | 20.9671 |
| UBA6    | 22.301  | 21.693  | 20.2195 | 19.9167 | 22.3773 | 22.2541 |
| UBAP2L  | 21.2912 | 19.9019 | 20.9018 | 20.8609 | 20.292  | 21.6521 |
| UBASH3B | 14.9567 | 15.5768 | 13.9335 | 14.6517 | 14.1541 | 14.6102 |
| UBE2C   | 18.0214 | 16.3767 | 18.2097 | 17.9062 | 16.1185 | 18.4699 |
| UBE2D3  | 19.4961 | 19.7861 | 19.4754 | 19.5795 | 18.3695 | 18.7739 |
| UBE2H   | 19.3955 | 20.0591 | 19.6899 | 19.4424 | 20.7221 | 20.5026 |
| UBE2I   | 21.9074 | 22.01   | 21.9017 | 21.9145 | 22.2629 | 21.7916 |
| UBE2K   | 22.7552 | 21.7387 | 21.1879 | 20.8525 | 22.4053 | 23.3914 |
| UBE2L3  | 22.9806 | 22.1809 | 21.8922 | 21.725  | 22.2557 | 22.51   |
| UBE2M   | 22.3152 | 21.6731 | 21.3006 | 21.0424 | 22.272  | 22.8918 |
| UBE2N   | 23.5548 | 22.8098 | 22.7038 | 22.5143 | 23.1208 | 23.5035 |
| UBE2O   | 20.6443 | 19.8919 | 20.7835 | 20.6911 | 20.4941 | 21.3415 |
| UBE2S   | 19.3714 | 18.5566 | 19.3543 | 19.0111 | 19.2811 | 20.2019 |
| UBE2V1  | 21.0735 | 20.0493 | 19.708  | 19.5236 | 20.9894 | 21.5137 |
| UBE3A   | 19.3631 | 18.7551 | 18.7683 | 18.478  | 17.9269 | 19.066  |
| UBE4A   | 20.3843 | 20.0685 | 20.2877 | 20.5401 | 20.1745 | 19.893  |
| UBLCP1  | 21.131  | 19.9329 | 20.3061 | 20.0408 | 19.7143 | 20.5181 |
| UBQLN4  | 19.6761 | 18.2681 | 19.6245 | 19.4384 | 19.3544 | 19.2005 |
| UBR4    | 21.1959 | 20.5046 | 20.9757 | 20.6194 | 21.1865 | 20.8164 |
| UBR5    | 16.2477 | 15.8308 | 18.1739 | 18.0389 | 16.7677 | 16.4111 |
| UBTD1   | 15.3246 | 17.5522 | 17.0412 | 17.4584 | 16.3746 | 16.5432 |
| UBTF    | 18.6509 | 19.8634 | 19.9799 | 19.8289 | 19.7693 | 19.8907 |
| UBXN1   | 20.7742 | 18.6607 | 19.8556 | 19.347  | 19.3743 | 20.4122 |
| UBXN4   | 21.3133 | 20.9717 | 20.8218 | 21.2064 | 21.1727 | 20.7172 |
| UBXN6   | 18.5204 | 19.028  | 17.0387 | 17.2815 | 18.6817 | 18.6265 |
| UBXN7   | 17.3988 | 17.3816 | 17.8836 | 17.8274 | 17.2365 | 18.3174 |
| UCHL1   | 23.1907 | 22.3056 | 22.6811 | 22.7254 | 23.2329 | 25.0417 |
| UCHL5   | 22.7216 | 21.8812 | 23.0537 | 22.5392 | 22.4035 | 23.0744 |
| UCK2    | 19.3748 | 19.2744 | 19.2644 | 18.6341 | 19.2708 | 19.9429 |
| UFD1L   | 21.5562 | 21.3656 | 21.5781 | 21.8821 | 21.356  | 22.2905 |
| UFL1    | 21.35   | 21.7961 | 21.3831 | 21.413  | 22.0683 | 21.3943 |
| UGDH    | 25.2938 | 24.3271 | 24.235  | 24.0498 | 24.5947 | 23.4753 |
| UGGT1   | 24.2531 | 24.7708 | 24.6094 | 24.5307 | 24.7574 | 23.2961 |
| UGP2    | 23.6627 | 23.7164 | 22.2908 | 21.7104 | 23.9266 | 23.1378 |
| UHRF1   | 20.0747 | 19.5295 | 20.4075 | 19.8868 | 20.4693 | 19.3982 |
| UMPS    | 21.4255 | 21.4124 | 21.4964 | 21.1741 | 21.7363 | 21.7691 |
| UNC45A  | 21.7399 | 21.8254 | 21.1178 | 20.8093 | 22.0886 | 21.2388 |

|          |         |         |         |         |         |         |
|----------|---------|---------|---------|---------|---------|---------|
| UPF1     | 24.1539 | 23.7536 | 23.4865 | 23.4223 | 24.0705 | 24.0327 |
| UPP1     | 20.7895 | 18.9289 | 18.3364 | 17.8078 | 19.5145 | 20.2216 |
| UQCR10   | 20.1601 | 20.4605 | 20.9211 | 20.912  | 20.6533 | 20.8412 |
| UQCRB    | 19.0244 | 19.0425 | 19.8467 | 19.9137 | 19.2825 | 18.5018 |
| UQCRC1   | 24.6217 | 24.5705 | 24.9904 | 25.2626 | 24.4976 | 24.3176 |
| UQCRC2   | 24.018  | 24.1414 | 24.6567 | 24.7968 | 24.356  | 23.6418 |
| UQCRFS1  | 22.5951 | 22.4272 | 23.1987 | 23.4512 | 22.6569 | 22.7301 |
| URB1     | 14.2872 | 15.8357 | 17.9972 | 17.6614 | 15.5097 | 15.2692 |
| URB2     | 16.248  | 17.4498 | 18.442  | 18.4683 | 16.8887 | 17.5926 |
| URGCP    | 13.5713 | 15.2964 | 13.587  | 14.2356 | 15.1402 | 14.1442 |
| UROD     | 20.6657 | 20.6387 | 20.4335 | 20.4116 | 20.6773 | 20.4736 |
| USMG5    | 21.0477 | 20.9126 | 21.6922 | 21.567  | 21.6222 | 21.6311 |
| USO1     | 22.8678 | 22.9523 | 22.2076 | 21.8309 | 23.8934 | 22.8619 |
| USP10    | 22.5035 | 22.0082 | 22.6919 | 22.5628 | 22.3756 | 21.9073 |
| USP14    | 22.4728 | 21.3507 | 21.9934 | 21.3906 | 22.2505 | 23.0593 |
| USP15    | 19.9774 | 18.1658 | 18.6669 | 17.5558 | 18.1803 | 18.6572 |
| USP19    | 13.9512 | 14.8177 | 15.4266 | 14.427  | 11.4993 | 14.1378 |
| USP24    | 20.37   | 20.0215 | 19.2251 | 19.2733 | 20.172  | 20.4356 |
| USP33    | 18.0929 | 17.7179 | 18.2724 | 18.0855 | 18.0839 | 18.0117 |
| USP39    | 18.555  | 20.3567 | 20.258  | 20.2495 | 19.6802 | 19.8627 |
| USP47    | 19.8543 | 19.2601 | 19.4793 | 19.1226 | 18.5061 | 19.0085 |
| USP5     | 23.822  | 22.8617 | 22.5945 | 22.3577 | 22.8624 | 23.1355 |
| USP7     | 23.2067 | 22.9766 | 23.0714 | 22.918  | 22.9303 | 22.4617 |
| USP9X    | 21.7325 | 20.4103 | 20.3136 | 20.252  | 20.9951 | 21.1697 |
| UTP14A   | 14.837  | 16.4694 | 17.8587 | 17.6683 | 16.9634 | 18.3247 |
| UTP15    | 17.385  | 18.1423 | 19.1457 | 18.9934 | 18.3569 | 19.6455 |
| UTP18    | 17.3493 | 18.9972 | 19.707  | 19.716  | 19.2378 | 20.0339 |
| UTP3     | 12.4632 | 16.641  | 17.0428 | 16.7312 | 14.1902 | 16.0492 |
| UTP4     | 19.486  | 20.2434 | 21.3479 | 21.1023 | 20.4948 | 21.6404 |
| UTP6     | 17.8001 | 18.1533 | 19.224  | 19.1495 | 18.2051 | 19.8176 |
| UTRN     | 21.3066 | 21.5705 | 21.2234 | 21.1592 | 21.337  | 21.536  |
| VAC14    | 19.9698 | 20.9435 | 19.6363 | 19.5994 | 20.7441 | 20.5078 |
| VAMP3    | 21.822  | 21.9075 | 21.7369 | 21.7579 | 22.3563 | 21.5286 |
| VAMP7    | 19.9337 | 20.3241 | 19.9522 | 19.8689 | 20.3279 | 20.0438 |
| VAPA     | 23.0967 | 23.9697 | 23.3951 | 23.5472 | 24.1633 | 23.6503 |
| VAPB     | 21.8616 | 22.4619 | 22.0984 | 22.6631 | 22.4883 | 21.9794 |
| VARS     | 22.8132 | 23.0795 | 23.2603 | 23.0809 | 23.7993 | 24.7056 |
| VASN     | 19.6782 | 19.694  | 19.9872 | 20.1435 | 18.3674 | 17.7823 |
| VASP     | 21.5362 | 21.923  | 20.3635 | 20.3004 | 22.3693 | 21.6114 |
| VAT1     | 22.8727 | 22.742  | 22.4005 | 22.5125 | 22.9005 | 22.2842 |
| VAV2     | 15.6203 | 13.2891 | 14.6711 | 13.133  | 11.2026 | 14.9944 |
| VBP1     | 21.0088 | 20.1279 | 20.8044 | 20.3482 | 20.4285 | 21.3281 |
| VCAM1    | 17.6369 | 16.1696 | 17.9235 | 18.7206 | 14.03   | 14.3037 |
| VCL      | 25.9858 | 24.9625 | 24.4161 | 24.0551 | 25.5203 | 26.0145 |
| VCP      | 26.7527 | 26.8873 | 26.639  | 27.1522 | 26.3102 | 28.4412 |
| VDAC1    | 26.8779 | 26.3808 | 27.2764 | 27.3747 | 26.4291 | 26.9158 |
| VDAC2    | 26.2041 | 25.7276 | 26.2472 | 26.2587 | 25.6656 | 26.3187 |
| VDAC3    | 24.5725 | 24.2885 | 24.8146 | 25.0573 | 24.2155 | 24.326  |
| VIM      | 31.6631 | 32.0129 | 30.389  | 30.4929 | 32.0228 | 31.6202 |
| VKORC1L1 | 19.6401 | 19.9482 | 20.025  | 20.3986 | 19.8821 | 19.1561 |
| VLDLR    | 12.5533 | 11.9888 | 11.9149 | 12.7275 | 13.9385 | 18.5325 |
| VPS11    | 16.8606 | 16.4183 | 16.887  | 16.1539 | 16.6698 | 15.9524 |

|         |         |         |         |         |         |         |
|---------|---------|---------|---------|---------|---------|---------|
| VPS16   | 17.991  | 17.9334 | 18.1096 | 17.9129 | 17.1969 | 16.9205 |
| VPS18   | 19.2843 | 19.2242 | 18.5873 | 18.0199 | 19.5359 | 18.8396 |
| VPS25   | 17.0562 | 15.7062 | 15.6092 | 15.8568 | 12.9037 | 15.4842 |
| VPS26A  | 21.5803 | 20.8742 | 20.8966 | 20.6147 | 21.5575 | 21.619  |
| VPS26B  | 19.7828 | 19.812  | 19.5534 | 19.9079 | 18.8535 | 20.1878 |
| VPS29   | 21.1334 | 20.4505 | 19.9989 | 20.1319 | 21.0185 | 21.0092 |
| VPS33A  | 18.4131 | 18.0925 | 17.9476 | 17.4991 | 17.9276 | 17.6483 |
| VPS33B  | 17.4385 | 18.0362 | 17.7223 | 17.5033 | 18.5462 | 18.1032 |
| VPS35   | 23.8447 | 23.1141 | 23.3779 | 23.035  | 23.4052 | 23.8417 |
| VPS41   | 16.9098 | 17.0321 | 16.5909 | 16.4434 | 15.2749 | 16.2392 |
| VPS45   | 20.0826 | 20.2827 | 20.392  | 20.4843 | 20.1631 | 20.7286 |
| VPS4A   | 19.5275 | 18.3471 | 18.9673 | 19.0255 | 18.588  | 20.5617 |
| VPS4B   | 18.3525 | 17.8809 | 16.5548 | 16.4768 | 17.2536 | 17.6434 |
| VPS51   | 17.5708 | 17.2002 | 17.9885 | 17.3593 | 17.0246 | 17.8263 |
| VTA1    | 20.4609 | 19.47   | 19.4303 | 19.4929 | 19.5824 | 21.7436 |
| VTN     | 17.7759 | 16.6682 | 16.397  | 16.9677 | 17.2103 | 16.0557 |
| VVA5A   | 20.4796 | 16.1583 | 16.3579 | 16.7302 | 16.639  | 15.4923 |
| VVA8    | 17.3788 | 16.4816 | 17.4815 | 17.0924 | 15.7888 | 16.7221 |
| WAC     | 14.1424 | 12.5802 | 16.7361 | 16.988  | 15.2233 | 15.8467 |
| WARS    | 26.5203 | 24.4812 | 23.6771 | 23.4237 | 24.905  | 24.095  |
| WBP11   | 20.0267 | 19.3645 | 20.3235 | 20.0488 | 19.8805 | 19.9999 |
| WBSCR16 | 18.7359 | 19.5547 | 19.2126 | 19.2752 | 20.4205 | 19.3952 |
| WDFY1   | 20.5473 | 21.1457 | 20.6967 | 20.3053 | 21.5965 | 20.6945 |
| WDHD1   | 18.884  | 18.4356 | 17.9499 | 17.4154 | 18.5031 | 17.7307 |
| WDR1    | 26.6582 | 25.9361 | 24.9717 | 24.7733 | 26.4397 | 26.4393 |
| WDR11   | 19.4842 | 20.0017 | 20.2761 | 19.9842 | 20.4768 | 20.1959 |
| WDR12   | 20.9561 | 21.152  | 21.2663 | 21.4077 | 20.9463 | 21.6975 |
| WDR18   | 20.594  | 21.4324 | 20.5566 | 20.9958 | 21.8613 | 21.0836 |
| WDR26   | 21.0485 | 21.557  | 20.3899 | 20.3148 | 21.7759 | 20.5585 |
| WDR3    | 16.7654 | 19.1682 | 20.5701 | 20.2169 | 19.1418 | 20.9616 |
| WDR33   | 17.4417 | 17.3046 | 17.2122 | 17.7514 | 17.7409 | 18.1029 |
| WDR36   | 19.9421 | 20.409  | 21.5184 | 21.5359 | 21.0149 | 21.6298 |
| WDR43   | 19.0674 | 21.0337 | 21.3789 | 21.2099 | 21.3226 | 21.5501 |
| WDR45B  | 18.7164 | 18.4057 | 18.3918 | 18.1398 | 18.6012 | 19.5467 |
| WDR5    | 20.6897 | 21.1824 | 21.3326 | 21.4458 | 20.7218 | 20.703  |
| WDR55   | 17.3283 | 19.1409 | 18.3648 | 18.1045 | 19.3812 | 17.7701 |
| WDR6    | 16.6023 | 18.2041 | 17.3583 | 16.8573 | 18.9448 | 19.0374 |
| WDR61   | 21.2869 | 20.7151 | 21.547  | 21.3839 | 20.274  | 22.4197 |
| WDR74   | 16.6842 | 17.9579 | 19.004  | 19.1081 | 17.6482 | 19.2383 |
| WDR75   | 21.5937 | 21.1632 | 21.4964 | 21.1635 | 21.4948 | 21.9926 |
| WDR77   | 22.726  | 21.8741 | 21.8821 | 21.1161 | 22.1892 | 22.7408 |
| WDR82   | 19.9231 | 20.3453 | 19.9576 | 20.141  | 20.2545 | 19.8517 |
| WDR92   | 18.3948 | 18.1349 | 17.6363 | 17.8132 | 18.1527 | 18.9791 |
| WFS1    | 16.8671 | 18.0562 | 18.4406 | 18.6222 | 18.9272 | 16.6182 |
| WRNIP1  | 17.5741 | 17.3004 | 16.9599 | 17.3512 | 14.8687 | 16.4367 |
| WTAP    | 16.8149 | 17.4609 | 18.032  | 18.3268 | 17.8422 | 17.1529 |
| WWP2    | 13.461  | 12.5591 | 14.9886 | 14.9956 | 12.3556 | 15.6524 |
| XAB2    | 18.6487 | 19.5838 | 19.7012 | 19.737  | 18.9381 | 18.8584 |
| XPNPEP1 | 22.4148 | 20.3944 | 20.6802 | 20.2524 | 21.0539 | 21.3693 |
| XPNPEP3 | 19.1709 | 19.0313 | 20.6757 | 20.4137 | 19.4997 | 18.8468 |
| XPO1    | 24.1825 | 23.8953 | 24.4861 | 24.2181 | 24.1314 | 24.5959 |
| XPO4    | 16.9349 | 16.0544 | 17.821  | 17.2542 | 17.2383 | 17.4184 |

|          |         |          |         |         |         |         |
|----------|---------|----------|---------|---------|---------|---------|
| XPO5     | 20.5596 | 19.9976  | 20.658  | 20.5038 | 20.1309 | 21.6231 |
| XPO6     | 15.6568 | 14.8932  | 16.2761 | 15.2244 | 15.5565 | 13.4894 |
| XPO7     | 19.1067 | 17.8017  | 18.9399 | 18.578  | 18.939  | 19.7384 |
| XPOT     | 21.126  | 20.8915  | 20.3772 | 19.799  | 21.2989 | 21.4432 |
| XRCC1    | 18.8848 | 18.6228  | 18.7333 | 18.6938 | 19.1497 | 19.0926 |
| XRCC5    | 27.0182 | 26.6299  | 26.242  | 26.2453 | 26.6298 | 26.3194 |
| XRCC6    | 26.1425 | 26.2326  | 26.0075 | 25.8795 | 26.203  | 26.1724 |
| XRN2     | 22.3687 | 23.1201  | 23.752  | 23.8497 | 23.2699 | 23.1308 |
| YARS     | 23.8137 | 22.8404  | 22.9628 | 22.5682 | 23.8187 | 24.3444 |
| YARS2    | 19.2879 | 20.4009  | 19.9447 | 20.4503 | 20.6563 | 20.281  |
| YBX1     | 21.5962 | 21.1902  | 21.7083 | 21.4697 | 22.007  | 22.3841 |
| YBX3     | 18.0059 | 18.1983  | 18.4555 | 17.9156 | 18.9252 | 18.5698 |
| YEATS2   | 14.2491 | 13.269   | 15.9588 | 16.256  | 10.6408 | 13.8591 |
| YES1     | 18.2146 | 19.1578  | 18.4639 | 18.804  | 19.2403 | 19.5422 |
| YIPF5    | 17.8305 | 19.0305  | 17.4716 | 18.0748 | 19.428  | 17.0053 |
| YKT6     | 19.4527 | 19.4823  | 18.8263 | 18.3999 | 19.9248 | 19.9435 |
| YLPM1    | 19.7616 | 20.026   | 19.3916 | 19.686  | 19.9757 | 19.1841 |
| YME1L1   | 20.099  | 20.3861  | 20.9892 | 21.2863 | 20.5637 | 21.5764 |
| YRDC     | 14.9999 | 14.7454  | 15.4047 | 14.419  | 15.4788 | 17.8759 |
| YTHDC1   | 18.2586 | 18.7745  | 18.1088 | 18.2899 | 18.8887 | 18.4578 |
| YTHDF2   | 18.8256 | 18.6495  | 19.3779 | 18.8512 | 18.6921 | 19.6749 |
| YTHDF3   | 19.0286 | 13.0211  | 18.4656 | 18.4527 | 15.587  | 19.1577 |
| YWHAB    | 23.7147 | 23.1816  | 23.7526 | 23.6507 | 23.2474 | 24.1457 |
| YWHAE    | 25.7231 | 24.8449  | 24.7811 | 24.7153 | 25.1164 | 25.8372 |
| YWHAG    | 24.0328 | 23.0176  | 23.4576 | 23.344  | 23.4789 | 23.9536 |
| YWHAH    | 22.7787 | 21.8355  | 21.3489 | 21.3431 | 22.1588 | 22.193  |
| YWHAQ    | 25.4088 | 23.9107  | 24.0537 | 23.8086 | 24.1217 | 25.3302 |
| YWHAZ    | 26.8087 | 25.1551  | 25.6827 | 25.498  | 25.6124 | 26.2414 |
| ZC3H11A  | 16.5338 | 16.4295  | 18.7534 | 18.3901 | 17.3356 | 18.2546 |
| ZC3H14   | 18.7817 | 16.9627  | 18.6832 | 18.6546 | 16.9459 | 18.1344 |
| ZC3H15   | 20.2271 | 20.1074  | 19.6014 | 18.9665 | 20.3755 | 21.0764 |
| ZC3H4    | 15.5094 | 9.51791  | 16.0514 | 16.3307 | 9.90282 | 14.3205 |
| ZC3HAV1  | 22.5335 | 20.699   | 21.7958 | 21.889  | 21.1947 | 22.2448 |
| ZFPL1    | 20.2039 | 20.4012  | 19.709  | 19.9526 | 20.5379 | 19.1478 |
| ZFR      | 19.5604 | 20.1207  | 20.3027 | 20.1028 | 20.4721 | 20.2909 |
| ZGPAT    | 19.7141 | 19.6637  | 20.9446 | 20.7717 | 20.0942 | 20.0216 |
| ZMPSTE24 | 21.5094 | 20.907   | 21.6473 | 21.3909 | 21.2922 | 20.6567 |
| ZMYND8   | 18.583  | 18.8756  | 19.8762 | 19.9242 | 18.8446 | 19.1718 |
| ZNF207   | 21.8203 | 21.4715  | 21.6984 | 21.6977 | 21.7469 | 22.2116 |
| ZNF326   | 20.76   | 20.2468  | 20.4867 | 21.0133 | 20.0846 | 20.4435 |
| ZNF622   | 15.4722 | 16.8535  | 17.9776 | 17.7846 | 16.6099 | 18.0754 |
| ZNF638   | 15.4214 | 17.2573  | 16.8537 | 17.0788 | 18.211  | 16.9941 |
| ZNHIT6   | 11.4697 | -1.72406 | NA      | NA      | NA      | 12.1054 |
| ZPR1     | 17.83   | 17.0802  | 16.5132 | 16.7368 | 17.771  | 18.7713 |
| ZRANB2   | 19.0929 | 19.3944  | 20.456  | 20.5533 | 19.9624 | 20.26   |
| ZW10     | 18.3998 | 18.7413  | 19.0714 | 18.4615 | 19.114  | 18.9049 |
| ZWILCH   | 16.7331 | 13.4278  | 16.0493 | 14.7844 | 14.481  | 16.0092 |
| ZYX      | 22.9618 | 23.2666  | 21.7662 | 21.9564 | 23.8985 | 23.042  |
