# Supplementary material for: The long non-coding RNA HOTAIRM1 promotes tumor aggressiveness and radiotherapy resistance in glioblastoma
Source: Cell Death Dis. 2021 Sep 28;12(10):885. doi: 10.1038/s41419-021-04146-0 (PMC8478910; doi:10.1038/s41419-021-04146-0)
Supplement: Supplementary file 16 — Supplementary Table 9 [file 41419_2021_4146_MOESM16_ESM.pdf]

**Supplementary Table 9. Mass spectrometry results of stable LN-229 *HOTAIRMI* knockdown cells**

Data supplied as Log2 intensities

| ID       | LN-229_control | LN-229_control | LN-229_control | LN-229_control | LN-229_control | LN-229_HOTAIRMI_KD | LN-229_HOTAIRMI_KD | LN-229_HOTAIRMI_KD | LN-229_HOTAIRMI_KD |
|----------|----------------|----------------|----------------|----------------|----------------|--------------------|--------------------|--------------------|--------------------|
| AAAS     | 20.2707        | 20.0783        | 20.2281        | 20.1135        | 20.0942        | 20.1536            | 20.6406            | 20.3122            | 20.3552            |
| AAGAB    | 17.6663        | 17.0309        | 17.4114        | 17.262         | 17.5227        | 16.1273            | 16.958             | 17.9081            | 17.51              |
| AAK1     | 17.865         | 17.4153        | 17.3982        | 17.3919        | 17.2845        | 17.0373            | 17.657             | 17.6172            | 17.9443            |
| AAMP     | 18.4515        | 18.2325        | 18.4887        | 18.4097        | 18.0909        | 18.0543            | 18.3055            | 18.1718            | 18.271             |
| AAR2     | 19.4322        | 18.8333        | 18.7869        | 19.0179        | 19.0206        | 19.1339            | 19.0521            | 18.8584            | 18.7929            |
| AARS     | 22.1567        | 22.098         | 22.0975        | 21.8621        | 21.9425        | 21.8565            | 22.0762            | 22.0603            | 22.0607            |
| AARS2    | 17.1108        | 17.6265        | 17.7677        | 17.5017        | 17.6652        | 17.1859            | 17.6826            | 17.4313            | 17.5711            |
| AARSD1   | 17.4513        | 17.2727        | 16.9285        | 16.882         | 17.3279        | 16.2446            | 16.6043            | 16.9875            | 16.7124            |
| AASDHPPT | 17.5614        | 17.8649        | 18.1514        | 17.977         | 18.0368        | 18.0058            | 17.8814            | 17.8439            | 17.7687            |
| AASS     | 17.5613        | 17.805         | 17.7738        | 17.4612        | 17.2856        | 17.1547            | 17.8981            | 17.39              | 17.3529            |
| AATF     | 17.4786        | 18.2297        | 17.4855        | 17.6062        | 17.6245        | 16.3923            | 17.5642            | 17.3761            | 17.227             |
| ABCB6    | 18.0897        | 17.7693        | 17.3536        | 17.7866        | 17.1946        | 16.718             | 17.1812            | 17.1677            | 17.1689            |
| ABCB7    | 17.7559        | 17.6342        | 17.6613        | 17.6056        | 17.5093        | 17.2331            | 17.7127            | 17.5104            | 17.9313            |
| ABCC1    | 16.9508        | 17.991         | 18.476         | 16.9534        | 19.0042        | 17.2               | 17.9608            | 18.6345            | 18.2048            |
| ABCD3    | 19.5934        | 21.8682        | 19.4256        | 19.5755        | 19.1766        | 19.1624            | 19.5673            | 19.0886            | 19.2144            |
| ABCE1    | 22.5646        | 22.5373        | 22.5579        | 22.5111        | 22.3183        | 22.2164            | 22.7736            | 22.407             | 22.5842            |
| ABCF1    | 19.4344        | 19.5852        | 19.4591        | 19.3458        | 18.8525        | 19.4295            | 19.2642            | 19.5144            | 19.3027            |
| ABCF2    | 21.0286        | 20.8668        | 20.8339        | 20.6697        | 20.6977        | 20.7797            | 20.7828            | 20.6957            | 21.1179            |
| ABCF3    | 18.5307        | 18.9513        | 19.0496        | 18.6996        | 18.6522        | 18.654             | 18.7082            | 19.0327            | 19.119             |
| ABHD10   | 19.975         | 19.998         | 19.8874        | 19.612         | 19.6173        | 19.6614            | 20.0365            | 19.6247            | 19.7041            |
| ABHD11   | 18.2972        | 17.8886        | 18.1341        | 17.4964        | 17.8399        | 18.0518            | 18.6408            | 18.4499            | 18.4084            |
| ABHD12   | 19.2667        | 19.159         | 19.2445        | 19.0701        | 19.069         | 19.472             | 19.9858            | 19.0976            | 19.2175            |
| ABHD14B  | 18.913         | 18.5617        | 18.8039        | 18.7821        | 18.7288        | 18.8722            | 18.7176            | 18.9307            | 18.6655            |
| ABII     | 18.8012        | 18.7405        | 18.6684        | 18.7688        | 18.5576        | 18.8425            | 18.7462            | 18.6975            | 18.8246            |
| ABR      | 19.1311        | 19.0967        | 19.1768        | 19.1341        | 18.5326        | 18.9874            | 19.6998            | 19.49              | 19.6512            |
| ACAA1    | 19.0736        | 19.0478        | 18.6454        | 18.872         | 18.9285        | 18.1179            | 18.8641            | 18.9122            | 18.6769            |
| ACAA2    | 18.7813        | 19.015         | 18.9557        | 19.0671        | 19.0966        | 19.1874            | 19.0111            | 18.8585            | 18.868             |
| ACACA    | 18.8626        | 18.4276        | 18.886         | 18.2945        | 18.3278        | 18.8262            | 19.4906            | 19.0367            | 19.159             |
| ACAD9    | 18.9279        | 18.1975        | 18.5254        | 18.5797        | 18.4079        | 19.0408            | 18.8441            | 18.6309            | 18.6695            |
| ACADM    | 21.9486        | 21.8902        | 21.7361        | 21.4832        | 21.4019        | 21.3595            | 21.57              | 21.4444            | 21.6066            |
| ACADSB   | 19.8036        | 19.7828        | 19.8745        | 19.8995        | 19.4138        | 19.7786            | 19.5798            | 19.9559            | 20.1143            |
| ACADVL   | 21.9171        | 21.7424        | 21.6106        | 21.6274        | 21.6279        | 21.7612            | 22.0421            | 21.6411            | 21.7654            |
| ACAT1    | 18.6728        | 18.6031        | 18.7436        | 18.3107        | 18.4981        | 17.7671            | 18.4073            | 18.1087            | 18.1148            |
| ACAT2    | 21.1871        | 20.9658        | 20.7784        | 20.8098        | 20.8712        | 20.3654            | 20.8885            | 20.6134            | 20.7426            |
| ACBD3    | 19.0722        | 19.2195        | 19.6441        | 19.4403        | 19.3448        | 19.3466            | 19.6976            | 19.3149            | 19.6893            |
| ACIN1    | 21.3035        | 21.1486        | 21.1244        | 21.1519        | 20.8603        | 20.9571            | 21.3336            | 21.1893            | 21.3689            |
| ACLY     | 21.7215        | 21.5281        | 21.4824        | 21.4766        | 21.2425        | 21.5196            | 22.0833            | 21.7609            | 21.8702            |
| ACO1     | 20.5695        | 20.6481        | 20.4341        | 20.7776        | 20.5666        | 20.0469            | 20.4318            | 20.6001            | 20.6533            |
| ACO2     | 21.2524        | 21.4578        | 21.1264        | 21.0654        | 20.9151        | 21.2266            | 21.569             | 21.2691            | 21.6625            |
| ACOT1    | 19.0417        | 19.0262        | 19.3871        | 19.1197        | 18.9929        | 18.8757            | 19.4006            | 19.0419            | 19.2177            |
| ACOT7    | 22.2444        | 22.0321        | 22.056         | 22.0371        | 21.9626        | 22.3216            | 22.3005            | 22.1691            | 22.3144            |
| ACOT8    | 17.9123        | 17.649         | 17.8532        | 17.7004        | 17.7247        | 17.9504            | 18.3764            | 18.1407            | 18.0624            |
| ACOT9    | 18.5695        | 17.9613        | 18.361         | 18.0696        | 18.3545        | 17.965             | 18.8737            | 18.5963            | 18.4208            |
| ACOX1    | 19.6059        | 19.465         | 19.0127        | 19.1068        | 19.0818        | 18.1407            | 18.7096            | 18.7197            | 18.8624            |

|         |         |         |         |         |         |         |         |         |         |
|---------|---------|---------|---------|---------|---------|---------|---------|---------|---------|
| ACP1    | 21.6768 | 21.8408 | 21.9542 | 21.8347 | 21.8663 | 21.9736 | 22.1306 | 21.7157 | 21.804  |
| ACSL1   | 21.0513 | 21.088  | 20.7944 | 20.9395 | 20.7495 | 20.8432 | 21.1355 | 20.9222 | 20.9865 |
| ACSL3   | 22.3696 | 22.4171 | 22.5031 | 22.3749 | 22.2242 | 22.3208 | 22.779  | 22.5807 | 22.7984 |
| ACSL4   | 18.7237 | 18.4619 | 18.1241 | 18.3105 | 18.2563 | 18.3026 | 18.3787 | 18.4167 | 18.3844 |
| ACSS1   | 20.3723 | 20.4843 | 20.46   | 20.22   | 20.0736 | 20.5863 | 20.8631 | 20.536  | 20.8021 |
| ACSS2   | 17.7504 | 17.4999 | 17.7752 | 17.8448 | 17.5238 | 17.4424 | 17.1961 | 17.7493 | 17.5747 |
| ACTB    | 29.277  | 28.8595 | 29.0482 | 29.0463 | 28.9532 | 29.2471 | 29.4416 | 29.0394 | 29.0789 |
| ACTL6A  | 21.7197 | 21.847  | 21.9802 | 21.7386 | 21.7194 | 21.5448 | 21.7551 | 21.3166 | 21.7725 |
| ACTN1   | 24.1303 | 23.9528 | 23.9178 | 23.6596 | 23.6555 | 23.7747 | 24.1185 | 24.0333 | 23.9083 |
| ACTN4   | 24.4606 | 24.2864 | 24.2812 | 24.2824 | 23.9326 | 24.2466 | 24.4606 | 24.3321 | 24.5721 |
| ACTR10  | 16.9833 | 17.9435 | 16.902  | 16.9224 | 16.7639 | 16.7786 | 16.401  | 16.637  | 16.3717 |
| ACTR1A  | 20.8616 | 20.705  | 20.6712 | 20.56   | 20.6067 | 20.8911 | 20.8256 | 20.6339 | 20.7262 |
| ACTR2   | 22.7509 | 22.0382 | 22.5968 | 22.6665 | 22.4107 | 22.4575 | 22.7709 | 22.5529 | 22.8327 |
| ACTR3   | 22.8615 | 22.5473 | 22.6675 | 22.7562 | 22.6275 | 22.5764 | 22.7228 | 22.6758 | 22.5689 |
| ACY1    | 19.0091 | 18.6754 | 18.7912 | 18.7818 | 18.5153 | 18.8391 | 19.0021 | 19.0849 | 18.2399 |
| ADAR    | 21.8386 | 21.3819 | 21.3956 | 21.3991 | 21.4285 | 21.3322 | 21.2033 | 21.5015 | 21.5748 |
| ADD1    | 18.879  | 18.2212 | 18.3837 | 18.3163 | 18.2787 | 18.4852 | 19.0293 | 18.7459 | 18.6225 |
| ADD3    | 18.5204 | 18.6317 | 18.4717 | 18.5524 | 18.3571 | 18.0329 | 17.8758 | 18.2973 | 18.3314 |
| ADH5    | 22.4609 | 22.1299 | 22.1927 | 22.2119 | 22.0594 | 22.0917 | 22.1917 | 22.1736 | 22.0249 |
| ADK     | 21.7978 | 20.8303 | 21.3748 | 22.2086 | 21.575  | 21.7821 | 21.4535 | 21.507  | 21.6883 |
| ADNP    | 19.7295 | 19.3866 | 19.3609 | 19.5098 | 19.2681 | 19.308  | 19.7058 | 19.5676 | 19.6308 |
| ADPGK   | 18.6183 | 19.1762 | 19.0641 | 18.6062 | 19.2183 | 19.0875 | 19.713  | 19.4654 | 18.9897 |
| ADPRHL2 | 17.9037 | 17.8052 | 17.8213 | 17.6776 | 17.6398 | 18.0362 | 17.8706 | 17.8254 | 17.4656 |
| ADRM1   | 21.5651 | 21.645  | 21.8251 | 21.4805 | 21.6554 | 21.3998 | 21.7462 | 21.3606 | 21.5625 |
| ADSL    | 21.7911 | 21.4216 | 21.4833 | 21.4548 | 21.2657 | 21.4364 | 22.0937 | 21.6334 | 21.3634 |
| ADSS    | 21.3701 | 21.3075 | 21.4561 | 21.2659 | 21.1638 | 21.0585 | 21.2662 | 20.9494 | 21.0479 |
| AFAP1   | 17.5287 | 16.0129 | 16.6414 | 17.0969 | 16.8119 | 17.2978 | 18.0108 | 16.6986 | 17.761  |
| AFG3L2  | 18.361  | 18.4177 | 18.4917 | 18.1948 | 18.2859 | 18.5957 | 18.8601 | 18.4991 | 18.2239 |
| AGA     | 19.757  | 20.0035 | 19.0981 | 19.5192 | 19.7956 | 19.8336 | 19.9307 | 19.4045 | 19.6267 |
| AGAP3   | 16.1945 | 16.9296 | 16.7122 | 16.441  | 16.3536 | 15.9534 | 16.5963 | 16.8693 | 16.9493 |
| AGFG1   | 18.9831 | 18.3601 | 18.9888 | 18.9287 | 18.6297 | 18.7664 | 18.7695 | 18.2772 | 18.5331 |
| AGK     | 22.2888 | 21.6877 | 21.5814 | 21.9907 | 21.4106 | 22.0757 | 21.4135 | 22.4171 | 22.2836 |
| AGL     | 17.8503 | 17.827  | 17.9895 | 17.6402 | 17.8122 | 17.1735 | 17.9971 | 17.9247 | 17.8528 |
| AGPAT9  | 20.5083 | 19.4239 | 20.2994 | 20.5434 | 20.1027 | 20.3489 | 20.4691 | 20.6717 | 20.9465 |
| AGPS    | 20.4207 | 20.0226 | 20.1027 | 19.979  | 19.8021 | 19.941  | 19.9599 | 20.1204 | 20.1923 |
| AHCTF1  | 16.6928 | 16.5038 | 16.6124 | 16.1841 | 16.4535 | 16.7705 | 17.1022 | 16.7952 | 16.7933 |
| AHCY    | 23.9758 | 23.4198 | 24.1749 | 24.0435 | 23.9907 | 24.229  | 24.6258 | 24.1245 | 24.228  |
| AHCYL1  | 21.1959 | 22.8062 | 21.2974 | 21.3471 | 21.1821 | 21.3712 | 21.7761 | 21.3021 | 21.6034 |
| AHNAK   | 24.1812 | 23.9109 | 23.8986 | 23.8746 | 23.6438 | 23.8004 | 23.8301 | 23.7283 | 24.0051 |
| AHNAK2  | 21.1172 | 21.0201 | 20.9921 | 21.0972 | 20.7116 | 21.3463 | 21.3239 | 21.3055 | 21.666  |
| AHSA1   | 21.3715 | 21.0808 | 21.2187 | 21.3138 | 21.2039 | 21.2984 | 21.2735 | 21.2804 | 21.3681 |
| AHSG    | 17.2003 | 17.3625 | 17.9427 | 18.2116 | 18.3985 | 18.7307 | 18.7225 | 16.3233 | 18.2959 |
| AIFM1   | 19.0226 | 18.8887 | 18.8728 | 18.9839 | 18.9105 | 19.0198 | 18.605  | 19.2237 | 19.0943 |
| AIMP1   | 22.1253 | 21.6966 | 21.93   | 21.8061 | 21.6544 | 21.9188 | 22.1194 | 21.8533 | 21.9493 |
| AIMP2   | 21.9385 | 21.7109 | 21.7005 | 21.7632 | 21.648  | 21.9857 | 22.0666 | 21.6916 | 21.936  |
| AIP     | 21.5589 | 21.1184 | 21.3231 | 21.5554 | 21.1953 | 21.5452 | 21.5927 | 21.5062 | 21.6009 |
| AK1     | 20.4552 | 20.58   | 20.9214 | 20.5527 | 20.5114 | 20.7853 | 20.9074 | 20.6289 | 20.7016 |
| AK2     | 22.2256 | 21.1098 | 22.3007 | 22.1538 | 22.1376 | 22.5211 | 22.8104 | 22.3067 | 22.5304 |
| AK3     | 18.7816 | 19.5092 | 19.443  | 19.6733 | 19.5981 | 19.7748 | 19.9865 | 19.5451 | 19.8131 |
| AK4     | 17.8322 | 17.9948 | 17.9302 | 17.7643 | 18.0199 | 18.3847 | 18.5235 | 18.0087 | 18.2467 |
| AK6     | 17.385  | 19.0882 | 18.2308 | 18.5784 | 18.8402 | 18.1252 | 18.8915 | 18.5922 | 18.7949 |
| AKAP1   | 17.5936 | 18.0591 | 18.3578 | 17.3    | 18.2863 | 18.2559 | 18.1655 | 18.0012 | 17.9761 |
| AKAP12  | 22.1933 | 21.4894 | 21.8247 | 21.9977 | 21.7914 | 21.6587 | 22.2353 | 21.6491 | 21.8767 |
| AKAP8   | 17.3447 | 17.3948 | 16.9047 | 16.3952 | 16.6445 | 16.449  | 16.3527 | 16.9651 | 16.8346 |
| AKR1A1  | 19.0337 | 19.1508 | 18.9182 | 18.9799 | 18.9597 | 19.1764 | 19.3383 | 19.0965 | 19.2399 |
| AKR1B1  | 21.9911 | 21.9815 | 22.0231 | 22.2059 | 22.131  | 22.8712 | 23.2775 | 22.5807 | 22.7902 |

|          |         |         |         |         |         |         |         |         |         |
|----------|---------|---------|---------|---------|---------|---------|---------|---------|---------|
| AKR1C3   | 18.3144 | 17.8427 | 18.1635 | 18.0833 | 17.915  | 19.0412 | 19.1023 | 19.1235 | 18.9841 |
| AKR7A2   | 19.7217 | 19.4289 | 19.2737 | 18.9855 | 19.1845 | 19.2248 | 19.3938 | 19.6647 | 19.6171 |
| AKT3     | 19.3152 | 18.7989 | 18.8975 | 18.5731 | 18.2481 | 18.4318 | 18.5824 | 18.8933 | 18.8415 |
| ALB      | 23.6473 | 22.8948 | 23.7115 | 24.2191 | 23.6903 | 23.2829 | 23.6929 | 22.8422 | 23.0122 |
| ALDH16A1 | 18.6913 | 19.397  | 18.5185 | 18.5889 | 18.2531 | 18.4013 | 18.6091 | 18.3663 | 18.4047 |
| ALDH18A1 | 21.0862 | 20.5328 | 20.9775 | 20.9916 | 21.0924 | 21.371  | 22.0357 | 21.286  | 21.4804 |
| ALDH1A3  | 24.8235 | 24.6968 | 24.6898 | 24.6142 | 24.6303 | 24.5416 | 24.5777 | 24.5945 | 24.3404 |
| ALDH1B1  | 18.9522 | 18.394  | 18.2638 | 18.6896 | 17.9664 | 18.8107 | 18.7669 | 19.029  | 19.3342 |
| ALDH3A2  | 18.3783 | 19.3961 | 19.8607 | 18.6221 | 19.6525 | 18.6811 | 20.0136 | 18.0947 | 18.8074 |
| ALDH5A1  | 18.626  | 18.6124 | 18.424  | 18.5463 | 18.3361 | 18.1728 | 18.4913 | 18.5578 | 18.4786 |
| ALDH7A1  | 21.5986 | 21.4785 | 21.5905 | 21.4826 | 21.38   | 21.1839 | 21.42   | 21.2414 | 21.145  |
| ALDH9A1  | 20.9953 | 20.6696 | 21.1749 | 20.8836 | 20.9721 | 21.0925 | 21.256  | 20.6804 | 20.992  |
| ALDOA    | 25.803  | 25.7619 | 25.7394 | 25.881  | 25.7997 | 26.2092 | 26.1169 | 25.9502 | 25.9675 |
| ALDOC    | 23.7622 | 23.6191 | 23.6869 | 23.7898 | 23.3334 | 23.4589 | 22.8708 | 23.5151 | 23.635  |
| ALG1     | 16.6647 | 16.8451 | 16.8641 | 16.8322 | 16.8009 | 17.1251 | 16.7536 | 16.8508 | 16.4599 |
| ALYREF   | 21.5541 | 20.9186 | 21.1543 | 21.6786 | 21.3637 | 21.4493 | 21.3226 | 21.3504 | 21.4255 |
| AMPD2    | 18.6065 | 18.9797 | 18.8788 | 18.4394 | 18.3673 | 18.3373 | 18.4837 | 18.4405 | 18.5387 |
| ANAPC1   | 17.4084 | 17.4837 | 17.8948 | 16.893  | 17.783  | 17.7757 | 17.8091 | 17.2272 | 17.0215 |
| ANAPC5   | 18.4858 | 17.7094 | 17.4592 | 17.5874 | 17.7998 | 17.4524 | 17.7238 | 17.9841 | 17.7343 |
| ANAPC7   | 19.1161 | 18.4352 | 18.9454 | 19.3157 | 18.8002 | 18.8503 | 19.1277 | 18.4963 | 18.9192 |
| ANKFY1   | 16.6204 | 16.6999 | 16.6554 | 16.6434 | 16.8468 | 16.9098 | 16.6216 | 16.6022 | 16.298  |
| ANKLE2   | 18.0503 | 18.2159 | 18.3343 | 18.4184 | 18.1748 | 18.6887 | 18.6499 | 18.5334 | 18.7396 |
| ANKRD28  | 18.5992 | 18.5236 | 18.586  | 18.4899 | 18.5445 | 18.3903 | 18.6021 | 18.4707 | 18.3892 |
| ANKRD52  | 16.2633 | 15.8642 | 15.9593 | 15.7204 | 15.9431 | 17.2376 | 18.2597 | 17.6146 | 17.2376 |
| ANLN     | 19.0892 | 18.9358 | 19.2058 | 18.9917 | 19.0653 | 19.2959 | 19.2425 | 19.1536 | 18.749  |
| ANP32A   | 19.6471 | 19.0374 | 20.0787 | 19.8773 | 20.2865 | 20.9483 | 21.1201 | 19.9629 | 19.9959 |
| ANP32B   | 21.1934 | 21.1357 | 21.2203 | 21.3404 | 21.0785 | 21.5403 | 21.2012 | 21.2591 | 21.2632 |
| ANP32E   | 22.0365 | 21.9017 | 21.8219 | 21.9115 | 21.8769 | 21.7782 | 21.9202 | 21.6387 | 21.7059 |
| ANXA1    | 24.5766 | 24.2399 | 24.7297 | 24.5278 | 24.6737 | 24.7408 | 25.0626 | 24.2995 | 24.5677 |
| ANXA11   | 21.2963 | 21.2847 | 21.1758 | 21.5442 | 21.3681 | 21.4093 | 21.6756 | 21.2618 | 21.5098 |
| ANXA2    | 26.865  | 26.1036 | 26.7024 | 26.7306 | 26.6252 | 26.8751 | 27.0859 | 26.7334 | 26.9354 |
| ANXA4    | 19.666  | 19.5458 | 19.473  | 19.4971 | 19.4142 | 19.4008 | 19.3439 | 19.2355 | 19.3761 |
| ANXA5    | 24.7986 | 24.9179 | 24.8757 | 24.6788 | 24.5474 | 24.7538 | 24.9276 | 24.695  | 24.7631 |
| ANXA6    | 21.4994 | 21.1081 | 21.376  | 21.3241 | 21.0364 | 21.2868 | 21.4958 | 21.2606 | 21.2446 |
| ANXA7    | 21.2153 | 20.7299 | 20.8392 | 20.6299 | 20.5229 | 20.5081 | 20.8619 | 20.4871 | 20.6316 |
| AP1B1    | 20.7594 | 20.7061 | 20.9424 | 20.8116 | 20.7178 | 20.8956 | 21.2133 | 21.0529 | 21.2684 |
| AP1G1    | 20.4601 | 20.2268 | 20.3715 | 20.118  | 20.1671 | 19.9298 | 20.6076 | 20.1968 | 20.5111 |
| AP1M1    | 20.8432 | 20.6037 | 20.5183 | 20.6208 | 20.5212 | 20.5453 | 20.8362 | 20.6335 | 20.653  |
| AP1S1    | 18.5836 | 18.9847 | 18.2238 | 18.156  | 17.9769 | 18.5537 | 18.5206 | 18.67   | 18.7938 |
| AP2A1    | 20.6273 | 20.5566 | 20.7599 | 20.4189 | 20.4131 | 20.4926 | 20.8128 | 20.6339 | 20.7046 |
| AP2A2    | 19.3546 | 19.2135 | 19.0672 | 19.1708 | 19.0171 | 18.9218 | 19.1076 | 18.9418 | 19.1302 |
| AP2B1    | 21.0718 | 20.9564 | 20.828  | 20.8918 | 20.8741 | 20.6959 | 20.9558 | 20.9289 | 21.0194 |
| AP2M1    | 19.9341 | 19.6608 | 19.6944 | 19.8013 | 19.6489 | 19.813  | 20.1718 | 19.8012 | 19.8041 |
| AP2S1    | 19.9283 | 20.4814 | 20.5559 | 20.308  | 20.2161 | 20.3722 | 20.3064 | 20.1853 | 20.2067 |
| AP3B1    | 19.7302 | 19.9394 | 19.9524 | 20.0384 | 19.7254 | 19.4741 | 20.1183 | 19.8884 | 19.9556 |
| AP3D1    | 20.3236 | 19.7242 | 19.1956 | 19.1243 | 18.9554 | 18.4382 | 18.933  | 19.3388 | 19.2446 |
| AP3M1    | 19.9347 | 19.7049 | 19.9594 | 19.8145 | 19.5965 | 19.8358 | 20.2866 | 19.9524 | 19.9754 |
| AP3S1    | 18.5171 | 18.5068 | 18.5337 | 18.488  | 18.3404 | 18.6043 | 18.7324 | 18.6139 | 18.5528 |
| APEH     | 20.6766 | 21.0884 | 21.2096 | 20.9687 | 20.9971 | 21.0793 | 21.1715 | 20.9938 | 21.2116 |
| APEX1    | 21.8105 | 24.0342 | 21.2678 | 21.572  | 21.112  | 21.5917 | 21.5004 | 21.5557 | 22.045  |
| API5     | 21.5952 | 21.9925 | 22.0037 | 21.7859 | 21.7084 | 21.4406 | 21.5176 | 21.6632 | 21.7633 |
| APIP     | 13.7404 | 17.1436 | 17.2913 | 17.4301 | 17.3914 | 17.1839 | 16.7538 | 17.0711 | 16.6345 |
| APMAP    | 23.4462 | 23.5412 | 23.5592 | 23.3078 | 23.2619 | 23.3407 | 23.7533 | 23.3188 | 23.591  |
| APOA1BP  | 19.864  | 19.7112 | 19.5543 | 20.2901 | 19.4344 | 19.5097 | 19.2323 | 19.4049 | 19.6539 |
| APOBEC3B | 20.8007 | 20.8663 | 20.5191 | 20.4881 | 19.9634 | 20.3132 | 20.7362 | 20.7982 | 20.9256 |
| APOOL    | 16.1328 | 16.6473 | 16.5934 | 16.4732 | 16.0465 | 15.3932 | 15.3625 | 16.1988 | 15.7745 |

|          |         |         |         |         |         |         |         |         |         |
|----------|---------|---------|---------|---------|---------|---------|---------|---------|---------|
| APP      | 16.3745 | 16.0997 | 15.7539 | 15.7973 | 16.2041 | 15.7683 | 16.5656 | 16.118  | 16.3441 |
| APPL1    | 19.1506 | 19.0217 | 19.0403 | 19.0607 | 18.933  | 18.8553 | 19.5297 | 19.0544 | 19.1112 |
| APRT     | 21.9901 | 21.6489 | 22.0357 | 21.9392 | 21.934  | 22.6035 | 22.9473 | 22.2463 | 22.2761 |
| AQR      | 19.7897 | 19.7934 | 19.9224 | 19.5879 | 19.649  | 19.4564 | 19.855  | 19.7217 | 19.7329 |
| ARAF     | 18.1358 | 17.7906 | 17.8749 | 17.9449 | 17.6983 | 17.9183 | 17.5593 | 18.0485 | 17.9924 |
| ARAP3    | 16.0032 | 16.948  | 16.6431 | 16.215  | 16.0891 | 16.0907 | 17.0777 | 16.4509 | 17.0105 |
| ARCN1    | 21.8862 | 21.7284 | 21.8042 | 21.513  | 21.6113 | 21.8498 | 22.0146 | 21.6487 | 21.7458 |
| ARF1     | 22.3158 | 25.6912 | 21.8947 | 22.3064 | 21.8619 | 22.3749 | 21.7335 | 22.3287 | 22.096  |
| ARF4     | 21.8963 | 22.0109 | 22.1965 | 22.1107 | 22.0331 | 22.111  | 21.9177 | 22.0433 | 22.2528 |
| ARF5     | 19.2837 | 19.5021 | 19.3957 | 19.4295 | 19.3752 | 19.7369 | 19.5335 | 19.7159 | 19.5125 |
| ARF6     | 19.7352 | 20.1998 | 20.2903 | 20.1594 | 20.555  | 20.6215 | 20.2973 | 20.5055 | 20.1551 |
| ARFGAP1  | 19.3766 | 19.0827 | 19.1788 | 19.0331 | 18.9712 | 19.0912 | 19.4706 | 19.0139 | 19.0528 |
| ARFGAP3  | 18.5157 | 18.0075 | 18.6995 | 18.2691 | 18.4583 | 17.9552 | 17.8315 | 18.1296 | 17.5347 |
| ARFGEF1  | 15.9465 | 17.2485 | 16.7071 | 17.2711 | 16.8581 | 16.9206 | 16.5799 | 16.5008 | 16.4166 |
| ARFGEF2  | 17.2041 | 17.1774 | 17.2997 | 17.0746 | 16.7352 | 16.3177 | 16.4578 | 16.5686 | 17.2347 |
| ARFIP1   | 18.8402 | 19.0988 | 18.8827 | 19.0963 | 18.8942 | 18.8271 | 18.8867 | 19.018  | 19.3551 |
| ARFIP2   | 17.6861 | 16.8849 | 16.9761 | 17.4088 | 17.3327 | 17.4862 | 17.77   | 17.4302 | 17.7596 |
| ARHGAP1  | 20.3265 | 20.6265 | 20.5459 | 20.5548 | 20.4518 | 20.6391 | 21.0674 | 20.4607 | 20.7855 |
| ARHGAP35 | 17.0164 | 16.9059 | 17.1886 | 17.0024 | 17.0209 | 16.5237 | 17.3493 | 17.0804 | 16.8216 |
| ARHGAP5  | 15.3404 | 15.9085 | 16.0756 | 15.7702 | 15.9723 | 15.8202 | 15.8613 | 16.2868 | 16.3906 |
| ARHGDIA  | 23.7888 | 23.2975 | 23.6157 | 23.5743 | 23.3739 | 24.0347 | 24.2633 | 23.9046 | 24.0383 |
| ARHGEF1  | 21.339  | 21.9557 | 21.978  | 21.1566 | 22.1616 | 22.7733 | 20.604  | 21.5695 | 21.2849 |
| ARHGEF11 | 15.4991 | 16.6138 | 16.4332 | 16.3072 | 16.3719 | 16.428  | 16.3946 | 16.5143 | 15.9675 |
| ARHGEF2  | 19.9039 | 19.5237 | 19.9454 | 20.0984 | 19.8443 | 19.7252 | 20.133  | 19.8189 | 19.9943 |
| ARIH1    | 18.7692 | 19.1992 | 19.2275 | 18.9579 | 19.0473 | 19.2218 | 19.714  | 19.1327 | 19.3153 |
| ARIH2    | 15.5805 | 18.6073 | 16.2624 | 15.8862 | 16.3903 | 16.4408 | 17.8499 | 16.5921 | 15.5809 |
| ARL1     | 20.7768 | 20.9263 | 21.0143 | 20.7571 | 20.7339 | 20.5789 | 20.6551 | 20.6074 | 20.6408 |
| ARL2     | 19.1686 | 19.2459 | 19.5629 | 19.305  | 19.1469 | 19.0904 | 18.5854 | 18.9109 | 18.8104 |
| ARL3     | 20.3643 | 18.9446 | 18.884  | 18.8404 | 18.7306 | 19.0977 | 19.4351 | 18.816  | 18.8313 |
| ARL6IP5  | 20.2808 | 20.515  | 20.2379 | 20.4214 | 20.1218 | 20.6944 | 20.7982 | 20.5594 | 20.3653 |
| ARL8B    | 19.7108 | 19.4963 | 19.9742 | 19.6446 | 19.8916 | 20.3328 | 20.1332 | 19.7043 | 19.7325 |
| ARMC6    | 22.3874 | 21.956  | 21.9039 | 22.3402 | 22.3517 | 22.397  | 22.2702 | 22.6792 | 21.8086 |
| ARMCX3   | 18.7344 | 18.7057 | 18.5314 | 18.3919 | 18.5232 | 18.8251 | 19.084  | 18.689  | 18.8267 |
| ARPC1A   | 20.3877 | 20.2952 | 20.4576 | 20.3245 | 20.3868 | 20.0264 | 20.7108 | 20.3064 | 20.2594 |
| ARPC1B   | 21.5252 | 22.7341 | 21.3219 | 21.6368 | 21.4311 | 21.6628 | 21.8841 | 21.582  | 21.8618 |
| ARPC2    | 22.519  | 22.5581 | 22.6545 | 22.2509 | 22.3036 | 22.4534 | 22.7354 | 22.4662 | 22.4873 |
| ARPC3    | 20.236  | 20.1488 | 19.9883 | 19.9813 | 19.9398 | 19.8713 | 20.0715 | 20.0643 | 20.0068 |
| ARPC4    | 23.0706 | 23.0987 | 23.0731 | 22.8968 | 22.9329 | 23.0983 | 23.3107 | 22.9345 | 23.0997 |
| ARPC5    | 21.583  | 21.6457 | 21.573  | 21.5553 | 21.6762 | 21.5057 | 21.9692 | 21.4237 | 21.6469 |
| ARPC5L   | 19.7449 | 19.2796 | 19.2445 | 19.3907 | 19.418  | 19.0672 | 19.3418 | 19.4341 | 19.5494 |
| ASAH1    | 18.1559 | 18.3761 | 18.3547 | 18.0404 | 18.3299 | 17.7994 | 17.9363 | 17.627  | 17.4223 |
| ASCC2    | 15.8111 | 16.8147 | 17.0885 | 16.296  | 16.6082 | 16.1707 | 16.3133 | 16.8553 | 16.5288 |
| ASCC3    | 15.6793 | 16.6144 | 16.509  | 16.7305 | 16.56   | 15.0617 | 16.0666 | 16.4421 | 16.2143 |
| ASF1B    | 19.2404 | 19.1573 | 19.4611 | 19.6575 | 19.0956 | 19.8263 | 19.8663 | 19.3074 | 19.5223 |
| ASH2L    | 18.1394 | 18.1025 | 17.9747 | 18.0795 | 17.9197 | 17.9675 | 17.2081 | 17.7594 | 17.7514 |
| ASNA1    | 20.2276 | 19.2494 | 19.8758 | 20.5362 | 19.6483 | 20.6554 | 20.8259 | 20.7501 | 20.4423 |
| ASNS     | 22.905  | 22.9684 | 22.9881 | 22.9172 | 22.8432 | 23.1974 | 23.6075 | 23.0816 | 23.3624 |
| ASPH     | 19.9065 | 19.7676 | 19.6211 | 19.7128 | 19.6963 | 19.3278 | 19.787  | 19.8739 | 19.7822 |
| ASPSCR1  | 18.6067 | 18.0421 | 18.2936 | 18.2093 | 18.1145 | 18.6479 | 18.7675 | 18.3222 | 18.1055 |
| ATAD1    | 19.3182 | 19.2809 | 19.091  | 19.288  | 19.0422 | 19.0377 | 18.6438 | 18.8834 | 19.0456 |
| ATAD2    | 20.2305 | 19.9203 | 20.6274 | 19.8076 | 20.2643 | 20.6032 | 21.5324 | 20.7146 | 20.1177 |
| ATAD3A   | 21.6399 | 21.2428 | 21.1246 | 21.1657 | 21.0833 | 21.2748 | 21.4072 | 21.1565 | 21.185  |
| ATAD3B   | 20.6971 | 20.5629 | 20.6497 | 20.7916 | 20.6365 | 20.9298 | 20.7611 | 20.5066 | 20.6335 |
| ATG3     | 18.8064 | 18.8628 | 18.825  | 18.9708 | 18.8906 | 18.642  | 18.3592 | 18.1687 | 18.1581 |
| ATG5     | 17.2329 | 17.7412 | 17.2815 | 17.0281 | 17.2738 | 17.608  | 17.298  | 17.3292 | 17.768  |
| ATG7     | 17.682  | 17.7915 | 17.995  | 17.7998 | 17.8708 | 17.3643 | 18.3643 | 18.0564 | 17.9117 |

|          |         |         |         |         |         |         |         |         |         |
|----------|---------|---------|---------|---------|---------|---------|---------|---------|---------|
| ATG9A    | 16.7688 | 17.1838 | 17.2621 | 17.0424 | 17.233  | 16.9719 | 17.3996 | 17.2949 | 16.8752 |
| ATIC     | 23.246  | 23.0536 | 23.1376 | 22.962  | 22.9901 | 23.0161 | 23.3512 | 23.0222 | 23.2143 |
| ATL2     | 20.1631 | 20.0901 | 20.0294 | 19.8435 | 19.8766 | 20.2885 | 20.3886 | 20.1382 | 20.2985 |
| ATL3     | 21.9039 | 21.6031 | 21.5401 | 21.5619 | 21.3789 | 21.0689 | 21.4571 | 21.4117 | 21.4529 |
| ATP13A1  | 19.2945 | 19.0158 | 19.3936 | 18.8171 | 19.0111 | 18.9212 | 19.4861 | 18.8273 | 18.914  |
| ATP1A1   | 23.6581 | 23.5091 | 23.6826 | 23.4441 | 23.2447 | 23.4894 | 23.9936 | 23.4669 | 23.8372 |
| ATP1B1   | 20.89   | 20.7901 | 20.4821 | 20.8051 | 20.2096 | 20.6398 | 21.1033 | 20.6797 | 20.7464 |
| ATP1B3   | 22.3989 | 21.637  | 22.2642 | 22.4523 | 22.2927 | 22.6118 | 22.8776 | 22.3808 | 22.579  |
| ATP2A2   | 22.5296 | 22.4486 | 22.3693 | 22.3101 | 22.1627 | 22.0052 | 22.2594 | 22.13   | 22.3068 |
| ATP2B1   | 18.2075 | 17.8929 | 18.1606 | 19.438  | 17.9406 | 18.381  | 17.7353 | 18.1199 | 18.0663 |
| ATP5A1   | 24.4401 | 24.2672 | 24.2844 | 24.038  | 24.108  | 24.2956 | 24.6898 | 24.383  | 24.4415 |
| ATP5B    | 24.2103 | 24.1845 | 24.0065 | 24.2602 | 23.9202 | 24.0735 | 23.8159 | 23.9159 | 24.1309 |
| ATP5C1   | 21.6951 | 21.5978 | 21.9264 | 21.6721 | 21.5773 | 21.7923 | 22.0688 | 21.7524 | 21.7796 |
| ATP5F1   | 20.9426 | 20.9952 | 20.8776 | 20.4911 | 20.7094 | 20.5493 | 21.2336 | 20.9062 | 20.9679 |
| ATP5H    | 21.1711 | 21.243  | 21.1892 | 21.2067 | 20.9353 | 21.2755 | 21.3661 | 21.1268 | 21.4238 |
| ATP5I    | 19.3057 | 19.1168 | 19.3497 | 19.0454 | 19.1314 | 18.9429 | 19.3342 | 19.2918 | 19.0898 |
| ATP5J2   | 20.0043 | 20.231  | 20.0545 | 19.8554 | 20.0114 | 19.5453 | 20.0147 | 20.115  | 20.0346 |
| ATP5L    | 21.3749 | 21.2607 | 21.0097 | 21.0831 | 20.9813 | 21.1132 | 21.448  | 21.1979 | 21.4162 |
| ATP5O    | 22.2297 | 22.2281 | 22.2907 | 22.0765 | 21.9162 | 22.3238 | 22.5846 | 22.3806 | 22.3608 |
| ATP6V0A1 | 19.5377 | 19.4999 | 19.4418 | 19.417  | 19.3702 | 19.5483 | 20.0096 | 19.6998 | 19.9042 |
| ATP6V0A2 | 16.5425 | 16.7694 | 16.6197 | 16.7282 | 16.4348 | 15.3282 | 16.5761 | 16.6632 | 16.5534 |
| ATP6V0D1 | 20.5528 | 20.4951 | 20.1941 | 20.3156 | 20.1433 | 20.7335 | 20.7909 | 20.5616 | 20.6856 |
| ATP6V1A  | 20.6766 | 20.7524 | 20.7916 | 20.4721 | 20.5278 | 19.872  | 20.3198 | 20.4133 | 20.3111 |
| ATP6V1B2 | 21.9492 | 21.5295 | 21.5986 | 21.5352 | 21.5277 | 21.5398 | 21.754  | 21.5563 | 21.5013 |
| ATP6V1C1 | 19.0001 | 19.0229 | 18.8984 | 18.8417 | 18.9718 | 19.2665 | 18.8855 | 18.6758 | 18.5498 |
| ATP6V1E1 | 20.1879 | 20.1872 | 20.3592 | 19.9502 | 20.0394 | 20.5334 | 20.0254 | 19.9872 | 20.205  |
| ATP6V1H  | 19.6392 | 19.9359 | 19.8831 | 19.6252 | 19.6137 | 19.4813 | 19.8837 | 19.7636 | 19.7452 |
| ATRIP    | 21.2881 | 21.4241 | 21.4147 | 21.0245 | 21.1593 | 21.1452 | 21.2143 | 21.3179 | 21.4734 |
| ATXN10   | 20.499  | 20.1844 | 20.1948 | 20.0227 | 20.1504 | 20.1429 | 20.6146 | 20.2448 | 20.379  |
| ATXN2    | 14.5636 | 16.2478 | 16      | 16.3771 | 15.7357 | 16.1405 | 16.3591 | 16.1141 | 16.9136 |
| ATXN2L   | 20.4764 | 20.2618 | 20.3966 | 20.479  | 20.4657 | 20.816  | 20.8449 | 20.5913 | 20.9198 |
| AUP1     | 20.232  | 20.1964 | 19.9826 | 20.2047 | 19.9863 | 20.0974 | 20.4421 | 20.0507 | 20.1    |
| AURKB    | 19.0588 | 18.8595 | 19.2083 | 18.9904 | 18.8055 | 19.178  | 19.3484 | 19.1773 | 19.1306 |
| AXL      | 20.1494 | 20.3047 | 20.3843 | 20.1387 | 20.0346 | 19.8369 | 20.2834 | 19.8513 | 20.1989 |
| B2M      | 20.6531 | 20.7255 | 20.6443 | 20.541  | 20.8848 | 20.9345 | 21.2847 | 20.541  | 20.9048 |
| BAG2     | 19.6225 | 19.5408 | 19.35   | 19.2467 | 19.0766 | 19.3563 | 19.1117 | 18.9952 | 19.0404 |
| BAG5     | 17.8017 | 17.6525 | 17.7031 | 17.465  | 17.3892 | 17.3099 | 17.4841 | 17.7216 | 17.741  |
| BAG6     | 20.271  | 20.186  | 20.2568 | 20.0567 | 20.1436 | 20.0798 | 20.469  | 20.2102 | 20.3088 |
| BAIAP2   | 18.6013 | 18.7516 | 18.7698 | 18.3123 | 18.5564 | 18.5477 | 19.1024 | 18.7392 | 18.782  |
| BANF1    | 21.1737 | 20.0839 | 20.558  | 21.1003 | 20.5744 | 20.995  | 20.6417 | 20.4286 | 20.9258 |
| BAX      | 20.1241 | 19.8232 | 19.7475 | 19.7017 | 19.83   | 20.2215 | 19.6078 | 19.8445 | 19.8154 |
| BCAP31   | 21.3712 | 19.2865 | 21.7794 | 21.4382 | 21.3192 | 21.7769 | 21.8986 | 21.1951 | 21.5127 |
| BCAR1    | 16.6147 | 17.9576 | 18.2373 | 18.2703 | 17.8737 | 18.5949 | 18.6071 | 18.2169 | 18.0725 |
| BCAS2    | 18.4085 | 17.9742 | 17.7658 | 18.3343 | 17.8923 | 17.7559 | 17.0736 | 17.6292 | 17.894  |
| BCAT1    | 18.428  | 18.2567 | 18.1111 | 18.4565 | 18.5396 | 16.9864 | 18.636  | 18.7383 | 18.2032 |
| BCAT2    | 18.4403 | 17.6929 | 18.3585 | 18.282  | 18.3808 | 18.6765 | 18.4619 | 18.5417 | 18.7998 |
| BCCIP    | 20.706  | 20.6425 | 20.4951 | 20.6946 | 20.302  | 20.82   | 20.9671 | 20.5308 | 20.657  |
| BCL2L13  | 18.5691 | 18.5403 | 18.2686 | 18.3921 | 18.34   | 18.2505 | 18.0666 | 18.0055 | 17.9578 |
| BCLAF1   | 21.0649 | 21.3479 | 21.248  | 21.3944 | 21.0497 | 20.9907 | 20.8376 | 20.828  | 21.2287 |
| BCS1L    | 18.7898 | 18.4878 | 18.49   | 18.3476 | 18.4758 | 18.3994 | 18.2534 | 18.533  | 17.9275 |
| BID      | 17.606  | 17.2838 | 17.1439 | 17.1467 | 16.9514 | 16.5752 | 17.0051 | 16.8116 | 16.8867 |
| BIN1     | 17.907  | 18.5932 | 18.0561 | 17.9913 | 18.1946 | 16.9043 | 17.685  | 18.0159 | 17.8544 |
| BIRC6    | 17.1633 | 17.2474 | 17.2156 | 17.0191 | 16.7759 | 16.8538 | 16.6601 | 16.6742 | 16.3704 |
| BLMH     | 19.9605 | 19.9865 | 19.5826 | 19.9517 | 19.752  | 19.2604 | 19.2858 | 19.6368 | 19.7666 |
| BLVRA    | 21.3182 | 20.5493 | 20.9626 | 21.1424 | 21.0251 | 21.1822 | 21.5977 | 21.2708 | 21.2267 |
| BLVRB    | 19.525  | 19.294  | 18.9509 | 19.3816 | 19.1029 | 19.5993 | 18.5133 | 19.2708 | 18.9903 |

|           |         |         |         |         |         |         |         |         |         |
|-----------|---------|---------|---------|---------|---------|---------|---------|---------|---------|
| BOP1      | 21.5288 | 20.9241 | 21.4763 | 21.6657 | 21.2928 | 20.974  | 21.242  | 21.453  | 21.3952 |
| BPNT1     | 20.1982 | 19.855  | 20.4926 | 20.1563 | 20.163  | 20.0366 | 20.3677 | 20.1558 | 20.0261 |
| BRAT1     | 17.7444 | 18.0602 | 18.223  | 18.0027 | 17.886  | 18.015  | 18.4714 | 17.8512 | 18.1517 |
| BRD4      | 19.3689 | 18.7406 | 18.6752 | 18.8594 | 18.4551 | 18.7325 | 18.7062 | 18.6526 | 18.7627 |
| BRD8      | 17.4908 | 17.7376 | 17.5522 | 17.6496 | 17.4928 | 17.4523 | 17.3934 | 17.7535 | 17.92   |
| BRE       | 18.801  | 18.4289 | 18.1683 | 18.0987 | 18.0661 | 17.8757 | 18.1314 | 18.1668 | 17.9588 |
| BRIX1     | 20.7273 | 20.7715 | 20.8855 | 20.5737 | 20.7495 | 20.5775 | 20.6719 | 20.5838 | 20.4047 |
| BROX      | 19.0092 | 18.8788 | 19.17   | 18.9412 | 18.9824 | 18.7668 | 19.0168 | 18.8469 | 18.7013 |
| BSG       | 21.4113 | 21.094  | 21.2928 | 21.4121 | 21.1492 | 21.2984 | 21.0156 | 21.147  | 21.4725 |
| BTAF1     | 17.3324 | 17.3157 | 17.3949 | 17.316  | 17.4652 | 17.106  | 17.581  | 17.2528 | 17.3066 |
| BTF3      | 21.3674 | 21.1277 | 21.2124 | 21.2771 | 21.0881 | 21.3028 | 20.8519 | 20.8336 | 20.9184 |
| BTF3L4    | 19.4025 | 18.8549 | 19.3431 | 19.2096 | 19.3336 | 19.0561 | 19.2254 | 19.0082 | 19.4534 |
| BUB3      | 21.4131 | 20.9713 | 21.6124 | 21.5882 | 21.0792 | 21.3605 | 21.5436 | 21.4452 | 21.505  |
| BUD31     | 20.3459 | 19.9342 | 20.2605 | 20.1848 | 20.1771 | 20.6044 | 20.4413 | 19.9154 | 20.1915 |
| BYSL      | 20.0093 | 19.9088 | 19.5935 | 19.5863 | 19.4483 | 19.6585 | 19.6513 | 19.7677 | 19.5329 |
| BZW1      | 23.0825 | 23.0192 | 23.0537 | 22.8311 | 22.751  | 22.9494 | 22.901  | 22.8254 | 23.0151 |
| BZW2      | 21.3262 | 21.4839 | 21.3901 | 21.2046 | 21.1665 | 21.4093 | 21.6538 | 21.2682 | 21.4075 |
| C11orf68  | 19.5812 | 18.8673 | 19.2295 | 19.246  | 19.1137 | 19.5104 | 19.7523 | 19.5588 | 19.2785 |
| C12orf10  | 21.6449 | 21.5249 | 21.6408 | 21.3944 | 21.386  | 21.7446 | 22.063  | 21.481  | 21.6216 |
| C14orf166 | 21.1939 | 20.9941 | 21.0644 | 20.9363 | 20.9639 | 21.0214 | 21.1001 | 20.962  | 21.0446 |
| C16orf58  | 15.6758 | 16.2964 | 16.3832 | 16.0143 | 15.9347 | 14.6129 | 14.8575 | 14.997  | 15.1849 |
| C18orf8   | 16.8995 | 16.8755 | 16.7666 | 16.9287 | 16.3376 | 16.8736 | 16.5622 | 17.0296 | 16.986  |
| C19orf10  | 23.0543 | 23.0903 | 23.2053 | 22.8652 | 23.0181 | 23.1008 | 23.4582 | 23.0547 | 23.2087 |
| C1QBP     | 24.0855 | 23.8519 | 23.6787 | 24.0564 | 23.8827 | 23.5942 | 23.3331 | 23.605  | 24.113  |
| C21orf59  | 16.6042 | 17.0883 | 16.7335 | 17.2582 | 16.942  | 15.6037 | 16.2912 | 16.7731 | 16.7516 |
| C22orf28  | 21.872  | 20.612  | 21.6983 | 22.0245 | 21.683  | 21.7115 | 21.8373 | 21.6882 | 22.0493 |
| C4orf27   | 17.7124 | 17.448  | 17.3551 | 17.5859 | 17.5566 | 17.3465 | 17.3541 | 17.4141 | 17.0236 |
| C6orf211  | 16.3291 | 16.6994 | 16.0645 | 16.5697 | 16.4355 | 16.773  | 15.5103 | 16.3558 | 16.0426 |
| C7orf50   | 19.2943 | 19.2544 | 18.8427 | 19.1076 | 18.7173 | 19.0924 | 18.6935 | 19.1776 | 19.0522 |
| C9orf114  | 18.0794 | 17.6405 | 18.0706 | 17.7913 | 17.8526 | 17.7453 | 18.642  | 17.8442 | 17.4296 |
| CAB39     | 19.3055 | 19.3286 | 19.4804 | 19.1521 | 19.148  | 19.3107 | 19.6805 | 19.2625 | 19.1579 |
| CACYBP    | 24.0614 | 23.8502 | 23.9434 | 23.7566 | 23.7909 | 23.3959 | 23.8785 | 23.4633 | 23.5065 |
| CAD       | 21.6723 | 20.9967 | 21.7166 | 21.6459 | 21.5751 | 21.3725 | 21.8397 | 21.6102 | 21.6452 |
| CADM4     | 20.6388 | 20.6643 | 20.6449 | 19.9999 | 20.8325 | 19.8638 | 19.9767 | 20.0937 | 20.1597 |
| CALB2     | 19.2012 | 18.9948 | 19.4272 | 19.0419 | 19.0649 | 20.14   | 20.1347 | 19.9462 | 19.9178 |
| CALD1     | 21.4109 | 20.9375 | 21.2283 | 21.4176 | 21.3474 | 21.246  | 21.2017 | 21.1619 | 21.419  |
| CALM1     | 21.2567 | 21.0892 | 21.2085 | 21.3445 | 21.3066 | 21.4131 | 22.1699 | 21.2942 | 21.8734 |
| CALR      | 25.5656 | 25.2639 | 25.1745 | 25.3132 | 25.1759 | 25.2285 | 25.2907 | 25.3162 | 25.5371 |
| CALU      | 21.6662 | 22.3626 | 22.2356 | 22.4888 | 22.2589 | 22.4593 | 22.9365 | 22.3991 | 23.111  |
| CAMK1     | 16.5912 | 16.3738 | 17.2683 | 16.4192 | 16.9935 | 16.8505 | 17.3871 | 16.7888 | 16.1548 |
| CAMK2D    | 19.4508 | 19.2164 | 19.4261 | 19.4154 | 19.0745 | 19.3342 | 19.7613 | 19.4438 | 19.4702 |
| CAMK4     | 18.7843 | 18.3679 | 18.2799 | 18.4312 | 18.2915 | 18.105  | 18.6801 | 18.1747 | 18.009  |
| CAMSAP2   | 15.7932 | 15.8967 | 15.9039 | 16.2875 | 15.0605 | 15.8731 | 15.9817 | 15.5313 | 15.5513 |
| CAND1     | 22.7769 | 21.8429 | 22.3759 | 22.5332 | 22.2565 | 22.2678 | 22.4667 | 22.4534 | 22.447  |
| CANX      | 24.6247 | 24.4305 | 23.9682 | 24.4895 | 24.0043 | 23.8118 | 23.7036 | 24.0256 | 24.2322 |
| CAP1      | 23.2661 | 21.8978 | 23.0283 | 22.9601 | 22.7866 | 22.9305 | 22.9167 | 22.8656 | 22.908  |
| CAP2      | 19.7109 | 19.3023 | 19.0047 | 19.4769 | 18.9485 | 18.8063 | 18.6998 | 18.9224 | 19.0781 |
| CAPN1     | 21.1097 | 20.8243 | 20.854  | 20.8644 | 20.7009 | 20.7881 | 21.0428 | 20.9788 | 21.024  |
| CAPN2     | 22.6837 | 22.3686 | 22.593  | 22.4428 | 22.2955 | 22.3997 | 22.7903 | 22.4616 | 22.4393 |
| CAPNS1    | 21.7925 | 22.1738 | 22.0022 | 21.903  | 21.5514 | 21.8411 | 21.8524 | 21.7151 | 22.0548 |
| CAPRIN1   | 22.1851 | 22.2275 | 22.1871 | 21.9514 | 21.8718 | 21.8827 | 22.3069 | 21.9009 | 22.288  |
| CAPS      | 21.6169 | 21.8172 | 22.015  | 22.0038 | 21.9672 | 22.1421 | 22.3082 | 21.6741 | 22.0636 |
| CAPZA1    | 22.9741 | 22.5865 | 22.6482 | 22.7331 | 22.5677 | 22.6917 | 22.6842 | 22.6482 | 22.7663 |
| CAPZA2    | 21.7342 | 21.2935 | 21.0265 | 21.3442 | 21.1741 | 21.3362 | 21.315  | 21.2799 | 21.1878 |
| CAPZB     | 23.1661 | 23.0678 | 23.1731 | 22.8532 | 22.7493 | 23.0158 | 23.2168 | 22.9362 | 23.1533 |
| CARM1     | 19.0599 | 18.3081 | 18.931  | 18.7778 | 18.6422 | 18.9173 | 19.3874 | 18.8421 | 19.1547 |

|         |         |         |         |         |         |         |         |         |         |
|---------|---------|---------|---------|---------|---------|---------|---------|---------|---------|
| CARS    | 20.9774 | 20.9219 | 21.0652 | 21.0086 | 20.8178 | 20.9027 | 20.8706 | 20.8749 | 21.0629 |
| CARS2   | 18.799  | 18.6991 | 19.0167 | 18.7392 | 18.84   | 19.1563 | 19.5922 | 18.9493 | 19.0217 |
| CASP2   | 17.2477 | 17.4412 | 17.3062 | 17.4684 | 17.2887 | 17.3909 | 17.3323 | 17.3127 | 17.1984 |
| CASP3   | 19.7453 | 19.3955 | 19.3535 | 19.5531 | 19.0901 | 19.1408 | 18.273  | 18.9404 | 18.9371 |
| CASP6   | 15.9248 | 16.7117 | 17.0195 | 16.3891 | 16.5809 | 16.8764 | 17.2339 | 16.9628 | 16.5625 |
| CAST    | 18.4618 | 18.2362 | 18.6707 | 18.2225 | 18.2243 | 17.7499 | 17.8168 | 17.8419 | 17.7299 |
| CAT     | 21.7159 | 21.6745 | 21.5859 | 21.6127 | 21.3747 | 21.8413 | 21.7319 | 21.4348 | 21.6444 |
| CBFB    | 20.2325 | 20.1129 | 20.0799 | 20.3906 | 20.0563 | 20.6214 | 20.387  | 20.3019 | 20.7673 |
| CBL     | 17.6039 | 17.3102 | 17.2302 | 17.409  | 16.9519 | 16.867  | 17.3501 | 16.7513 | 17.4321 |
| CBR1    | 19.7718 | 19.4704 | 19.7855 | 19.3151 | 19.5009 | 19.7182 | 19.9667 | 19.4295 | 19.3172 |
| CBR3    | 19.7462 | 19.4975 | 19.7031 | 19.653  | 19.4393 | 19.5805 | 19.3705 | 19.4033 | 19.52   |
| CBX1    | 20.574  | 19.5816 | 20.3735 | 20.6034 | 20.442  | 20.071  | 20.4619 | 20.203  | 20.497  |
| CBX3    | 23.053  | 22.5399 | 23.2748 | 23.2676 | 23.2714 | 23.4442 | 23.6656 | 23.0361 | 23.4098 |
| CBX5    | 20.5474 | 20.6955 | 20.6799 | 20.6465 | 20.3899 | 20.704  | 20.7597 | 20.4178 | 20.7388 |
| CCAR1   | 20.063  | 19.9819 | 20.1172 | 19.8791 | 19.7484 | 19.9069 | 20.1888 | 19.9683 | 20.0702 |
| CCDC12  | 17.7747 | 16.1229 | 17.8126 | 17.829  | 17.8111 | 18.407  | 18.7018 | 18.0631 | 18.3232 |
| CCDC124 | 19.3985 | 19.0821 | 19.0366 | 19.0249 | 18.8137 | 19.4116 | 19.4579 | 19.0613 | 19.3002 |
| CCDC22  | 18.6967 | 18.318  | 18.7308 | 18.2208 | 18.4141 | 18.65   | 19.3368 | 18.7909 | 18.7867 |
| CCDC47  | 19.6042 | 18.6197 | 19.1815 | 19.6574 | 19.2151 | 19.4755 | 19.0726 | 19.33   | 19.6438 |
| CCDC51  | 18.8086 | 18.8151 | 18.8931 | 18.3948 | 18.7129 | 18.6498 | 18.8439 | 18.7673 | 18.5578 |
| CCDC6   | 18.9282 | 18.498  | 18.2497 | 18.4402 | 18.2036 | 18.4158 | 18.4872 | 18.1784 | 18.6513 |
| CCDC86  | 19.3559 | 18.664  | 18.5738 | 18.8299 | 18.4163 | 18.6748 | 18.8475 | 18.8758 | 19.2313 |
| CCNA2   | 17.7209 | 17.1166 | 16.9483 | 16.9024 | 16.6059 | 16.8273 | 16.1902 | 16.6071 | 16.9853 |
| CCNH    | 18.1646 | 17.7704 | 17.9269 | 17.844  | 17.6929 | 17.7977 | 18.1042 | 18.1387 | 18.1049 |
| CCNK    | 19.5939 | 19.782  | 19.6939 | 19.4558 | 19.5951 | 19.7102 | 20.1907 | 20.0445 | 19.9165 |
| CCT2    | 24.1367 | 22.8435 | 24.0127 | 23.9521 | 24.0267 | 24.0072 | 24.3667 | 23.8624 | 24.0072 |
| CCT3    | 24.5751 | 24.3046 | 24.382  | 24.3486 | 24.2531 | 24.1738 | 24.2864 | 24.2528 | 24.2841 |
| CCT4    | 23.8234 | 24.1491 | 23.8785 | 24.0806 | 23.9787 | 23.9022 | 24.2303 | 23.8727 | 24.0725 |
| CCT5    | 24.2519 | 23.7411 | 23.9429 | 23.8868 | 23.9055 | 24.0727 | 24.1751 | 23.9806 | 24.0322 |
| CCT6A   | 23.6592 | 23.7422 | 23.6308 | 23.551  | 23.4579 | 23.356  | 23.688  | 23.4323 | 23.573  |
| CCT7    | 24.0471 | 23.9812 | 24.017  | 23.9205 | 23.7389 | 23.7916 | 23.9609 | 23.7952 | 23.9122 |
| CCT8    | 23.9996 | 24.0202 | 23.9596 | 23.7239 | 23.6897 | 23.9195 | 24.0505 | 23.7701 | 23.9772 |
| CD109   | 22.6508 | 21.818  | 21.9557 | 21.6376 | 21.6696 | 21.1916 | 21.955  | 21.6984 | 21.6158 |
| CD151   | 20.4253 | 19.884  | 20.3945 | 20.29   | 20.2687 | 20.2783 | 20.8177 | 20.5049 | 20.7961 |
| CD276   | 19.0717 | 18.4773 | 18.6409 | 18.4881 | 18.8556 | 18.4285 | 18.7626 | 18.7862 | 18.6156 |
| CD2AP   | 19.6283 | 19.6397 | 18.935  | 19.1304 | 18.6102 | 18.5844 | 18.9534 | 19.5107 | 19.2404 |
| CD2BP2  | 17.3496 | 17.0794 | 17.1015 | 17.511  | 17.2291 | 16.9345 | 17.2323 | 17.4045 | 17.3485 |
| CD3EAP  | 18.3997 | 18.3844 | 18.1172 | 18.5124 | 18.0391 | 18.3637 | 18.1005 | 18.1814 | 18.458  |
| CD44    | 23.4716 | 23.2396 | 23.3377 | 23.179  | 23.1927 | 23.1406 | 23.2804 | 23.0343 | 23.1898 |
| CD59    | 21.7782 | 20.6754 | 21.6905 | 21.7391 | 21.723  | 22.2881 | 22.5066 | 21.7539 | 22.3847 |
| CD63    | 20.5202 | 16.0829 | 20.3759 | 20.7024 | 20.3834 | 20.668  | 20.4856 | 20.2606 | 20.7966 |
| CD74    | 21.0895 | 21.4431 | 20.7825 | 20.7925 | 20.5494 | 20.8577 | 20.8569 | 20.7633 | 21.1121 |
| CD81    | 20.7433 | 20.2881 | 20.3485 | 20.2564 | 20.2059 | 20.3308 | 20.5823 | 20.6317 | 20.4703 |
| CDC123  | 17.5434 | 17.8631 | 17.9568 | 17.8259 | 17.7689 | 16.0831 | 17.6071 | 17.6916 | 17.0601 |
| CDC16   | 18.4748 | 18.4204 | 18.3612 | 17.9747 | 18.0144 | 17.7325 | 17.664  | 18.1359 | 17.5847 |
| CDC20   | 19.0502 | 19.2801 | 18.9185 | 19.1106 | 18.9398 | 19.3305 | 19.3749 | 19.2371 | 19.3376 |
| CDC23   | 18.7378 | 18.829  | 18.6075 | 18.433  | 18.5184 | 18.3026 | 18.2442 | 18.6209 | 18.5175 |
| CDC27   | 18.581  | 17.8158 | 18.3143 | 18.2612 | 18.1196 | 17.8714 | 18.2664 | 18.2099 | 18.324  |
| CDC37   | 22.2731 | 22.1798 | 22.0644 | 22.2692 | 21.8166 | 22.3947 | 21.8357 | 21.9396 | 22.1625 |
| CDC40   | 17.602  | 17.6355 | 17.6831 | 17.4314 | 17.9022 | 17.0215 | 17.8868 | 17.1947 | 17.4551 |
| CDC42   | 21.9763 | 22.1727 | 21.9863 | 21.9617 | 22.1285 | 21.6389 | 21.5279 | 21.7771 | 21.6791 |
| CDC45   | 18.0603 | 18.8808 | 18.9897 | 19.313  | 18.0571 | 18.8265 | 18.5118 | 18.5045 | 18.4495 |
| CDC5L   | 21.2946 | 20.9672 | 21.0491 | 21.0676 | 20.912  | 21.127  | 21.3603 | 20.9802 | 21.28   |
| CDC73   | 20.4498 | 20.3871 | 20.6651 | 20.1338 | 20.1567 | 20.0143 | 20.3361 | 20.0095 | 20.0167 |
| CDCA8   | 17.7189 | 17.5232 | 17.8052 | 17.9859 | 17.1472 | 17.7648 | 16.9672 | 17.2096 | 17.4191 |
| CDH13   | 18.5506 | 18.4536 | 18.1308 | 18.6703 | 18.5999 | 18.1487 | 18.9251 | 18.8945 | 18.7691 |

|          |         |         |         |         |         |         |         |         |         |
|----------|---------|---------|---------|---------|---------|---------|---------|---------|---------|
| CDH2     | 19.9299 | 20.0767 | 20.3136 | 20.2955 | 20.2446 | 20.1459 | 19.9042 | 19.8464 | 20.0376 |
| CDIPT    | 17.5609 | 18.1493 | 18.067  | 18.1492 | 17.6394 | 17.5441 | 16.9949 | 17.6125 | 17.54   |
| CDK1     | 21.329  | 21.3081 | 21.6059 | 21.4251 | 21.249  | 21.2875 | 21.451  | 21.3027 | 21.4493 |
| CDK11B   | 19.5498 | 20.0696 | 20.0158 | 19.8153 | 19.6856 | 19.517  | 20.0258 | 19.577  | 19.8705 |
| CDK12    | 17.9623 | 17.9407 | 17.8823 | 17.8711 | 17.7766 | 17.9377 | 17.9729 | 18.1555 | 17.9936 |
| CDK2     | 20.2112 | 19.9467 | 20.1652 | 19.6948 | 19.9653 | 20.2328 | 20.5284 | 20.019  | 19.8716 |
| CDK5     | 20.3675 | 20.6386 | 20.441  | 20.0831 | 20.3108 | 20.581  | 20.9076 | 20.4037 | 20.4386 |
| CDK5RAP1 | 16.5659 | 16.6577 | 16.149  | 16.264  | 16.3848 | 16.3856 | 16.4549 | 16.4078 | 16.1195 |
| CDK5RAP3 | 17.8529 | 17.9967 | 17.8165 | 17.788  | 17.8624 | 17.618  | 17.8674 | 17.5874 | 17.4495 |
| CDK6     | 21.1755 | 21.2331 | 21.0969 | 21.2582 | 20.7528 | 20.6164 | 20.7587 | 20.6475 | 21.0372 |
| CDK9     | 18.6985 | 19.0422 | 18.9995 | 18.8061 | 18.5157 | 18.9546 | 19.0174 | 18.8517 | 18.8586 |
| CDV3     | 19.6193 | 19.0458 | 19.0384 | 19.7547 | 19.1191 | 19.5898 | 19.6701 | 19.4104 | 19.4933 |
| CEBPZ    | 19.1498 | 18.4212 | 18.684  | 18.5908 | 18.5249 | 18.2295 | 18.6593 | 18.5951 | 18.7483 |
| CECR5    | 19.5763 | 22.7842 | 18.9039 | 19.2732 | 19.8555 | 19.2871 | 19.2614 | 19.5246 | 19.7755 |
| CELF1    | 20.4515 | 20.5858 | 20.632  | 20.6999 | 20.4937 | 20.8282 | 20.6211 | 20.6039 | 20.7568 |
| CEP170   | 18.1663 | 24.4873 | 18.8759 | 19.2358 | 18.7863 | 18.904  | 18.8428 | 18.7261 | 19.059  |
| CERS2    | 21.6595 | 21.4857 | 21.448  | 21.5564 | 21.1718 | 21.4984 | 21.6656 | 21.3564 | 21.425  |
| CFL1     | 26.125  | 26.0129 | 26.1969 | 26.1406 | 26.1651 | 26.4908 | 26.3481 | 25.9404 | 25.8393 |
| CFL2     | 19.5244 | 19.2378 | 19.5535 | 19.6858 | 19.5423 | 19.8858 | 19.5757 | 19.3053 | 19.4182 |
| CGGBP1   | 20.6632 | 20.1571 | 20.9669 | 20.3986 | 20.698  | 21.0984 | 21.4285 | 20.7376 | 20.7645 |
| CHAF1A   | 18.3016 | 18.1648 | 18.4267 | 18.1812 | 17.9576 | 17.9306 | 18.3329 | 17.9411 | 18.1868 |
| CHAMP1   | 20.0795 | 19.9504 | 19.9321 | 19.8855 | 19.7978 | 20.1493 | 20.2482 | 20.0905 | 20.0932 |
| CHCHD2   | 19.6893 | 19.1113 | 19.2148 | 19.2721 | 19.0854 | 19.4617 | 20.0188 | 19.5596 | 19.597  |
| CHCHD3   | 21.2356 | 21.7271 | 20.953  | 21.1145 | 20.9727 | 21.3264 | 21.3471 | 21.1816 | 21.5137 |
| CHD1     | 18.2634 | 17.8415 | 17.7478 | 18.0521 | 17.8083 | 17.7107 | 17.7955 | 18.0045 | 18.2583 |
| CHD1L    | 18.28   | 18.0685 | 18.1844 | 18.0483 | 17.9632 | 17.9543 | 18.3385 | 18.194  | 18.09   |
| CHD4     | 20.8984 | 20.8956 | 20.7977 | 20.6438 | 20.7143 | 20.6744 | 21.2277 | 20.7035 | 20.8771 |
| CHERP    | 19.251  | 19.3499 | 19.5398 | 19.5211 | 19.1586 | 18.9531 | 19.3734 | 19.3207 | 19.6653 |
| CHID1    | 16.5935 | 17.3669 | 17.5039 | 17.6313 | 17.3643 | 16.4377 | 16.1231 | 17.6779 | 17.4618 |
| CHMP3    | 18.1976 | 18.1351 | 17.4517 | 17.8192 | 17.725  | 17.7953 | 17.9217 | 18.1103 | 17.357  |
| CHMP4B   | 18.677  | 17.8082 | 18.2895 | 18.6072 | 18.3684 | 18.5344 | 19.0237 | 18.5628 | 18.8275 |
| CHMP5    | 17.5122 | 17.1422 | 16.8913 | 17.9256 | 16.4881 | 17.992  | 17.3986 | 17.2107 | 17.9552 |
| CHMP7    | 17.2609 | 17.1484 | 17.3422 | 17.0348 | 16.8419 | 16.6076 | 16.3633 | 17.2108 | 17.348  |
| CHORDC1  | 19.8912 | 18.9715 | 19.6427 | 19.7893 | 19.6775 | 19.9157 | 19.5927 | 19.5709 | 19.9156 |
| CHP1     | 20.3244 | 20.1585 | 20.2245 | 19.9624 | 20.1163 | 20.3497 | 20.9169 | 20.4359 | 20.651  |
| CIAO1    | 20.0832 | 20.0319 | 19.7851 | 19.8838 | 19.8115 | 19.8508 | 20.1418 | 19.9875 | 20.1294 |
| CIAPIN1  | 20.3011 | 20.7141 | 20.5695 | 20.665  | 20.3221 | 20.8863 | 21.1723 | 20.5924 | 20.827  |
| CIRBP    | 19.9068 | 19.5554 | 19.5471 | 19.5995 | 19.55   | 19.7299 | 19.45   | 19.6675 | 19.8938 |
| CIRH1A   | 20.1018 | 20.4643 | 20.1144 | 20.0822 | 20.0255 | 20.0866 | 20.2735 | 20.1984 | 20.5525 |
| CISD2    | 20.5739 | 20.6528 | 20.7857 | 20.3881 | 20.4633 | 20.6233 | 20.9566 | 20.5555 | 20.7659 |
| CIT      | 18.1096 | 17.3942 | 17.879  | 18.203  | 18.2497 | 18.0873 | 18.2018 | 17.7165 | 18.092  |
| CKAP4    | 23.3747 | 23.1226 | 23.2647 | 22.8195 | 23.118  | 22.8476 | 23.063  | 22.7965 | 22.7421 |
| CKAP5    | 19.0063 | 19.2955 | 19.2558 | 19.0674 | 19.0416 | 18.7298 | 19.4095 | 19.3271 | 19.1948 |
| CLASP1   | 20.6187 | 20.6947 | 20.5403 | 20.4356 | 20.4323 | 20.1293 | 20.6506 | 20.5278 | 20.8023 |
| CLASP2   | 18.1704 | 17.5876 | 17.4048 | 17.2379 | 17.1937 | 17.4896 | 17.5219 | 17.5814 | 17.648  |
| CLCC1    | 17.35   | 17.5112 | 16.4194 | 17.5897 | 16.928  | 15.3319 | 15.506  | 16.9728 | 16.9795 |
| CLIC1    | 23.3698 | 23.2658 | 23.2625 | 23.1523 | 23.1819 | 23.3457 | 23.7232 | 23.1382 | 23.4008 |
| CLIC4    | 22.2728 | 22.9944 | 22.1855 | 22.1032 | 22.0534 | 21.8861 | 22.1985 | 21.8212 | 21.9199 |
| CLINT1   | 19.653  | 19.8771 | 19.92   | 20.4008 | 20.102  | 20.1041 | 19.6801 | 19.7168 | 19.978  |
| CLIP1    | 17.4878 | 17.7054 | 17.5298 | 17.4959 | 17.461  | 17.181  | 17.2439 | 17.7815 | 17.9576 |
| CLMN     | 17.9132 | 18.1656 | 17.9579 | 17.8293 | 17.8894 | 17.4973 | 17.4597 | 17.79   | 17.747  |
| CLNS1A   | 18.7144 | 19.6473 | 19.4964 | 19.8227 | 19.7619 | 18.2336 | 18.2242 | 19.6072 | 19.5166 |
| CLPB     | 20.5703 | 20.2694 | 20.3739 | 20.5842 | 20.4268 | 20.6234 | 20.9431 | 20.5525 | 20.7637 |
| CLPTM1   | 18.4809 | 15.6826 | 18.5857 | 18.5969 | 18.7369 | 18.7198 | 18.6577 | 18.2392 | 18.4165 |
| CLPTM1L  | 18.2259 | 18.3256 | 17.9614 | 18.0158 | 18.057  | 16.2115 | 17.3064 | 17.4635 | 16.8763 |
| CLPX     | 20.0659 | 20.142  | 20.2163 | 20.0764 | 19.7286 | 20.0478 | 20.4909 | 19.9999 | 20.174  |

|          |         |         |         |         |         |         |         |         |         |
|----------|---------|---------|---------|---------|---------|---------|---------|---------|---------|
| CLTA     | 19.0438 | 18.9167 | 19.534  | 19.4337 | 19.137  | 19.6964 | 20.1503 | 19.1476 | 19.7978 |
| CLTC     | 24.7753 | 24.3812 | 24.6702 | 24.5434 | 24.3069 | 24.2738 | 24.6514 | 24.469  | 24.5244 |
| CLUH     | 20.6078 | 20.2583 | 20.2186 | 20.018  | 19.9635 | 19.9102 | 20.2646 | 19.9637 | 20.1323 |
| CMAS     | 20.2722 | 20.0097 | 19.9912 | 20.0035 | 19.8601 | 19.9179 | 20.3983 | 20.0861 | 20.3167 |
| CMBL     | 16.1501 | 16.2346 | 15.7891 | 16.5348 | 16.4577 | 15.0123 | 15.6204 | 17.256  | 17.6774 |
| CMPK1    | 21.5063 | 21.4105 | 21.5914 | 21.4024 | 21.4097 | 21.6166 | 21.6487 | 21.4874 | 21.3518 |
| CMSS1    | 18.0929 | 18.0327 | 18.0044 | 17.8453 | 17.7654 | 19.3721 | 18.1632 | 17.8671 | 17.9292 |
| CMTR1    | 17.8679 | 17.5876 | 17.8967 | 17.6651 | 17.7233 | 17.5552 | 18.0754 | 17.8893 | 17.7147 |
| CNBP     | 19.6441 | 17.5082 | 19.5045 | 19.5615 | 19.4897 | 20.089  | 19.9344 | 19.9794 | 20.186  |
| CNDP2    | 21.705  | 21.4602 | 21.4025 | 21.2842 | 21.258  | 21.4879 | 21.7136 | 21.3589 | 21.4192 |
| CNN2     | 20.4418 | 19.679  | 19.7641 | 19.7163 | 19.3689 | 19.5649 | 18.5803 | 19.2513 | 19.1334 |
| CNN3     | 22.3831 | 22.3943 | 22.2369 | 22.3962 | 22.1692 | 22.0621 | 21.9306 | 21.9582 | 22.0231 |
| CNOT1    | 18.2465 | 18.3188 | 18.2724 | 18.208  | 18.2897 | 18.2845 | 18.6141 | 18.3983 | 18.3597 |
| CNP      | 21.6716 | 21.9884 | 21.7939 | 21.6829 | 21.6224 | 21.9453 | 22.1208 | 21.6169 | 21.9552 |
| CNPY2    | 22.1429 | 21.9174 | 22.1773 | 22.326  | 22.3102 | 22.5803 | 22.6363 | 22.1377 | 22.4242 |
| CNPY3    | 20.0589 | 22.5908 | 19.8053 | 19.7562 | 19.661  | 19.6398 | 19.6572 | 19.5287 | 19.7783 |
| CNTNAP1  | 17.6502 | 17.8714 | 17.91   | 17.4279 | 17.9333 | 17.5794 | 18.7778 | 17.831  | 18.1792 |
| COASY    | 18.5502 | 18.3996 | 18.3231 | 18.1908 | 18.3556 | 18.1743 | 18.2077 | 18.0221 | 18.1055 |
| COG4     | 17.9486 | 18.4963 | 18.9978 | 18.4342 | 18.8399 | 18.0319 | 19.1881 | 17.8366 | 18.642  |
| COIL     | 17.6913 | 17.9071 | 17.9852 | 17.8648 | 17.8783 | 17.8312 | 18.3096 | 17.757  | 17.7976 |
| COL4A3BP | 17.5871 | 17.4391 | 18.1554 | 17.8889 | 18.1028 | 18.457  | 18.1968 | 17.0481 | 16.5691 |
| COLGALT1 | 20.4966 | 20.2508 | 20.1997 | 19.9207 | 19.9441 | 19.5641 | 19.7353 | 19.6917 | 19.8188 |
| COMMD3   | 18.9548 | 19.0164 | 18.7821 | 18.5964 | 18.477  | 19.2736 | 18.6199 | 19.0455 | 18.7221 |
| COMMD4   | 18.8326 | 19.0172 | 18.2527 | 19.0092 | 18.4638 | 17.6666 | 17.6695 | 18.4869 | 18.5305 |
| COMT     | 21.0926 | 24.7863 | 20.4211 | 20.8137 | 20.694  | 22.5043 | 20.6957 | 20.8853 | 20.9687 |
| COPA     | 22.5795 | 22.4901 | 22.6457 | 22.5702 | 22.4298 | 22.566  | 23.0037 | 22.5299 | 22.7146 |
| COPB1    | 22.098  | 22.0066 | 22.2998 | 22.1681 | 21.8223 | 22.067  | 22.4761 | 22.2056 | 22.2709 |
| COPB2    | 21.8149 | 21.608  | 21.6789 | 21.8004 | 21.5941 | 21.568  | 22.1604 | 21.8358 | 22.0328 |
| COPE     | 21.4134 | 21.3686 | 21.4188 | 21.2382 | 21.0413 | 21.2074 | 21.4121 | 21.197  | 21.3544 |
| COPG1    | 21.3355 | 21.0474 | 21.1115 | 21.1585 | 20.9209 | 21.1405 | 21.4044 | 21.1275 | 21.2058 |
| COPG2    | 20.7151 | 20.5971 | 20.4727 | 20.315  | 20.1475 | 20.2443 | 20.8472 | 20.4336 | 20.5572 |
| COPS2    | 21.0928 | 20.7943 | 20.7077 | 20.666  | 20.512  | 20.7594 | 20.8621 | 20.6286 | 20.8051 |
| COPS3    | 20.7474 | 20.5847 | 20.5713 | 20.4753 | 20.5921 | 20.5258 | 20.0664 | 20.6371 | 20.6434 |
| COPS4    | 20.9738 | 20.6644 | 20.5997 | 20.814  | 20.6637 | 20.8195 | 20.9999 | 20.6927 | 20.5213 |
| COPS5    | 20.8911 | 20.9046 | 20.8649 | 20.7841 | 20.7379 | 20.7379 | 21.2317 | 20.833  | 20.9102 |
| COPS6    | 20.9115 | 20.9285 | 20.7826 | 20.4909 | 20.557  | 20.9712 | 21.1357 | 20.7265 | 20.9716 |
| COPS7A   | 19.146  | 19.2386 | 18.921  | 19.24   | 18.744  | 18.5929 | 18.8527 | 18.8477 | 18.9505 |
| COPS7B   | 17.3256 | 19.0428 | 17.3066 | 17.675  | 17.29   | 18.0667 | 18.3419 | 18.0284 | 18.4429 |
| COPS8    | 20.3401 | 20.3069 | 20.2772 | 20.1696 | 20.2314 | 20.6375 | 20.397  | 20.2376 | 20.3212 |
| COPZ1    | 20.96   | 19.6054 | 20.7103 | 20.2682 | 20.6592 | 21.1128 | 20.9003 | 20.8227 | 20.8559 |
| CORO1A   | 16.9226 | 16.7769 | 16.3199 | 16.7196 | 16.3527 | 16.5583 | 15.915  | 16.7523 | 16.9004 |
| CORO1B   | 21.1106 | 20.9178 | 21.0933 | 21.0977 | 21.0395 | 21.2334 | 21.1522 | 20.852  | 20.9713 |
| CORO1C   | 22.7    | 22.5653 | 22.5474 | 22.5337 | 22.5447 | 22.7454 | 22.4928 | 22.826  | 22.6977 |
| COTL1    | 23.8698 | 23.8866 | 23.9469 | 23.8849 | 23.673  | 24.0958 | 24.103  | 23.9706 | 23.9875 |
| COX4I1   | 22.4858 | 22.1618 | 22.3537 | 22.5386 | 22.1767 | 22.7079 | 22.6554 | 22.6531 | 23.0939 |
| COX5A    | 19.3354 | 19.5166 | 19.1444 | 19.2274 | 19.3561 | 19.9302 | 19.5467 | 19.5387 | 19.4943 |
| COX5B    | 20.5536 | 20.9225 | 20.4564 | 20.7916 | 20.2372 | 20.7193 | 21.0552 | 20.5844 | 21.1914 |
| COX6B1   | 18.3387 | 18.5332 | 18.342  | 18.9089 | 18.6458 | 18.8682 | 19.2067 | 18.7371 | 19.1946 |
| CPD      | 16.832  | 17.0402 | 16.8755 | 17.0757 | 16.9424 | 16.3506 | 16.5103 | 16.4623 | 16.8086 |
| CPNE1    | 22.8097 | 22.6211 | 22.5713 | 22.6714 | 22.3979 | 22.3032 | 22.4458 | 22.2619 | 22.3641 |
| CPNE3    | 21.3575 | 21.5317 | 21.3114 | 21.4291 | 21.2405 | 21.3558 | 21.5886 | 21.3564 | 21.5463 |
| CPOX     | 20.6868 | 20.6154 | 20.5978 | 20.4725 | 20.4099 | 19.9325 | 20.5378 | 19.957  | 20.1397 |
| CPSF1    | 18.9074 | 19.0481 | 19.0509 | 19.0034 | 18.7487 | 18.8682 | 19.0495 | 18.9767 | 19.1489 |
| CPSF2    | 19.2344 | 19.1422 | 19.551  | 18.6143 | 19.0698 | 19.4687 | 19.6468 | 19.502  | 19.7116 |
| CPSF3    | 20.1594 | 20.2565 | 20.0351 | 20.1356 | 20.1679 | 20.0466 | 20.5962 | 20.2228 | 20.1935 |
| CPSF3L   | 17.9484 | 17.8907 | 17.9479 | 17.7668 | 17.9914 | 17.8784 | 18.3971 | 17.8494 | 17.9124 |

|         |         |         |         |         |         |         |         |         |         |
|---------|---------|---------|---------|---------|---------|---------|---------|---------|---------|
| CPSF6   | 22.0354 | 21.9215 | 21.8545 | 21.9164 | 21.726  | 21.7693 | 22.1073 | 21.8453 | 22.1909 |
| CPSF7   | 20.0857 | 19.8103 | 20.1671 | 20.0789 | 19.9638 | 20.2515 | 20.5398 | 20.1283 | 20.2008 |
| CPT1A   | 21.6252 | 21.6049 | 21.8569 | 21.1835 | 21.5509 | 21.7119 | 22.2295 | 21.716  | 21.7202 |
| CPT2    | 19.3039 | 19.255  | 19.2931 | 19.2874 | 19.161  | 19.3015 | 19.658  | 19.3737 | 19.722  |
| CRELD2  | 17.5645 | 16.9569 | 17.95   | 17.6081 | 17.9964 | 17.0393 | 17.6716 | 17.9185 | 17.9418 |
| CRIP2   | 19.4069 | 18.6754 | 18.8052 | 18.8192 | 18.9275 | 19.5027 | 19.3131 | 18.9043 | 18.9881 |
| CRK     | 21.0262 | 21.1334 | 20.7411 | 20.9627 | 20.8618 | 19.3372 | 20.3518 | 20.8767 | 20.7987 |
| CRKL    | 20.1017 | 19.8954 | 19.8089 | 19.7781 | 19.864  | 19.646  | 19.9555 | 19.8108 | 19.888  |
| CRNKL1  | 19.2765 | 19.2149 | 19.2216 | 19.0376 | 19.1684 | 19.1011 | 19.411  | 19.1907 | 19.3083 |
| CRTAP   | 20.4792 | 20.3149 | 20.9473 | 20.7894 | 20.6405 | 20.8179 | 21.1167 | 20.7421 | 21.0582 |
| CRYZ    | 21.8637 | 21.7225 | 21.5868 | 21.6032 | 21.5446 | 21.7296 | 21.8655 | 21.5946 | 21.6563 |
| CS      | 23.3755 | 23.3482 | 23.5172 | 23.1659 | 23.1652 | 23.5075 | 24.0742 | 23.5777 | 23.7512 |
| CSDE1   | 21.8821 | 21.7823 | 21.9282 | 21.7297 | 21.6313 | 21.5275 | 22.0728 | 21.7453 | 21.9125 |
| CSE1L   | 23.8412 | 23.8079 | 23.8903 | 23.7649 | 23.4482 | 23.5989 | 23.9616 | 23.7466 | 23.8596 |
| CSK     | 19.1073 | 19.2484 | 19.2187 | 19.0223 | 18.8972 | 18.405  | 19.2385 | 18.9686 | 19.0957 |
| CSNK1A1 | 19.0503 | 18.9833 | 19.2145 | 18.8964 | 18.9791 | 18.6828 | 18.8744 | 18.7947 | 18.7915 |
| CSNK1D  | 16.2454 | 18.7675 | 16.7808 | 15.1463 | 16.3545 | 16.6714 | 16.728  | 17.0996 | 15.7162 |
| CSNK2A1 | 22.0246 | 21.7356 | 21.8203 | 21.7134 | 21.5601 | 21.8871 | 22.2916 | 21.8744 | 21.9971 |
| CSNK2A2 | 19.8931 | 20.078  | 20.0051 | 19.9649 | 19.8669 | 20.1718 | 20.1497 | 20.0106 | 20.0789 |
| CSNK2B  | 21.4795 | 20.791  | 20.9922 | 21.2846 | 20.8834 | 21.1995 | 21.0851 | 21.3102 | 21.5867 |
| CSPG4   | 21.8003 | 21.0433 | 21.4778 | 21.7899 | 21.628  | 22.2635 | 22.507  | 21.8847 | 22.1193 |
| CSRP1   | 23.1947 | 22.354  | 22.7512 | 22.8878 | 22.6634 | 23.0839 | 23.4039 | 23.1066 | 23.228  |
| CSRP2   | 21.3492 | 21.2343 | 21.564  | 21.1446 | 21.0989 | 21.1875 | 21.0063 | 20.8814 | 20.8911 |
| CSTB    | 19.6818 | 19.7901 | 20.0705 | 20.1888 | 20.1267 | 20.5474 | 20.726  | 20.1631 | 20.4797 |
| CSTF1   | 20.5607 | 20.4766 | 20.7021 | 20.4317 | 20.5571 | 20.4531 | 20.8678 | 20.6076 | 20.7207 |
| CSTF2   | 20.8406 | 20.4546 | 20.721  | 20.8273 | 20.7587 | 20.8324 | 21.2907 | 20.7398 | 20.9992 |
| CSTF3   | 19.7366 | 19.9639 | 19.9469 | 19.9137 | 19.5297 | 19.4342 | 19.7034 | 19.6521 | 19.9597 |
| CTBP1   | 20.6768 | 20.2459 | 20.244  | 20.3332 | 20.1199 | 20.1966 | 20.3429 | 20.3225 | 20.4464 |
| CTBP2   | 20.2995 | 19.6679 | 19.6068 | 19.7405 | 19.5423 | 19.5803 | 20.0029 | 19.6626 | 19.8674 |
| CTDP1   | 17.9332 | 17.8497 | 18.2497 | 18.0107 | 17.7444 | 18.0595 | 18.5592 | 18.0809 | 18.2826 |
| CTHRC1  | 18.8816 | 18.9254 | 19.3323 | 18.9554 | 18.8104 | 19.0253 | 19.4428 | 19.041  | 18.9533 |
| CTNNA1  | 21.8443 | 21.9586 | 21.5757 | 21.5898 | 21.5326 | 21.6326 | 21.773  | 21.6837 | 21.7617 |
| CTNNAL1 | 16.0792 | 16.1004 | 16.2961 | 16.2492 | 16.3402 | 14.7809 | 15.5852 | 15.6663 | 14.8058 |
| CTNNB1  | 21.1118 | 19.7797 | 20.5781 | 21.0159 | 20.6926 | 20.8915 | 21.0713 | 20.9318 | 20.9784 |
| CTNNBL1 | 20.3069 | 20.2599 | 20.155  | 20.0094 | 20.1452 | 20.1839 | 20.3017 | 20.1393 | 20.1622 |
| CTNND1  | 22.107  | 21.994  | 22.1534 | 22.1028 | 22.0842 | 22.364  | 22.6409 | 22.0169 | 22.182  |
| CTPS1   | 22.5205 | 22.2884 | 22.3479 | 22.3615 | 22.1099 | 22.4012 | 22.7913 | 22.3779 | 22.5897 |
| CTR9    | 19.8418 | 19.4082 | 19.5536 | 19.4387 | 19.5205 | 19.5455 | 19.8818 | 19.5894 | 19.253  |
| CTSA    | 21.5014 | 21.4671 | 21.4245 | 21.209  | 21.2076 | 21.2612 | 21.6878 | 21.6234 | 21.6757 |
| CTSB    | 21.2389 | 21.0807 | 21.2014 | 21.0998 | 20.7505 | 20.8698 | 21.0057 | 20.8547 | 21.0869 |
| CTSC    | 20.4461 | 20.2432 | 20.4641 | 20.5716 | 20.5473 | 20.5371 | 20.4943 | 20.5806 | 20.6764 |
| CTSD    | 21.9179 | 22.4555 | 21.9634 | 22.0533 | 21.7246 | 22.0579 | 22.5687 | 22.2489 | 22.6884 |
| CTTN    | 21.1468 | 20.8774 | 20.9687 | 21.181  | 21.0146 | 21.1748 | 21.0471 | 21.1629 | 21.5065 |
| CUL1    | 19.6852 | 19.4807 | 19.8951 | 19.8931 | 19.673  | 19.9007 | 19.9867 | 19.7016 | 19.775  |
| CUL2    | 19.3661 | 18.9047 | 19.503  | 19.6078 | 19.4905 | 19.177  | 19.3153 | 19.2468 | 19.3344 |
| CUL3    | 19.0679 | 19.4059 | 19.1198 | 19.2007 | 19.0855 | 19.0958 | 19.3606 | 19.2499 | 19.4566 |
| CUL4A   | 17.6897 | 18.5429 | 17.7146 | 17.9211 | 17.7382 | 17.3968 | 18.4769 | 18.315  | 18.4609 |
| CUTA    | 19.6904 | 19.7059 | 19.6939 | 19.826  | 19.8606 | 19.8544 | 19.5982 | 19.6942 | 20.2502 |
| CWF19L1 | 18.8576 | 18.9412 | 19.0275 | 18.8653 | 18.8922 | 18.9321 | 19.3292 | 19.0589 | 18.9757 |
| CYB5A   | 19.1295 | 19.5119 | 18.557  | 19.109  | 18.8975 | 19.2591 | 18.6735 | 18.4938 | 18.9599 |
| CYB5B   | 20.8171 | 20.2435 | 20.4334 | 20.787  | 20.4304 | 20.8475 | 20.413  | 20.5474 | 20.4854 |
| CYB5R1  | 18.5566 | 18.6822 | 18.246  | 18.5787 | 18.3032 | 18.3087 | 18.2487 | 18.3289 | 18.2848 |
| CYB5R2  | 21.6154 | 21.2101 | 21.283  | 21.435  | 21.2487 | 22.0053 | 21.66   | 21.4    | 21.3755 |
| CYB5R3  | 23.5279 | 22.9526 | 22.7992 | 22.6712 | 22.5299 | 22.6683 | 22.6008 | 22.7664 | 22.9946 |
| CYC1    | 22.175  | 22.1193 | 22.2649 | 21.9459 | 22.2334 | 22.34   | 22.8612 | 22.3786 | 22.2855 |
| CYCS    | 22.034  | 22.1308 | 22.0481 | 21.9778 | 21.889  | 22.2138 | 22.1886 | 22.0341 | 21.9908 |

|         |         |         |         |         |         |         |         |         |         |
|---------|---------|---------|---------|---------|---------|---------|---------|---------|---------|
| CYFIP1  | 20.3979 | 20.5283 | 20.5723 | 20.484  | 20.5488 | 20.3267 | 20.7946 | 20.4632 | 20.7419 |
| CYP51A1 | 18.684  | 17.7111 | 18.7989 | 18.8958 | 18.5373 | 19.2834 | 19.3599 | 18.7341 | 19.1696 |
| DAG1    | 19.2428 | 18.9085 | 18.9177 | 19.0559 | 18.9558 | 18.7589 | 18.4214 | 18.498  | 18.6402 |
| DAK     | 18.4212 | 18.3389 | 18.299  | 17.9305 | 18.0196 | 18.1011 | 18.4969 | 17.9948 | 17.8351 |
| DAP3    | 20.3171 | 20.4148 | 20.2568 | 20.1369 | 20.1213 | 20.3952 | 20.6537 | 20.2034 | 20.552  |
| DARS    | 23.0412 | 22.8078 | 22.7661 | 22.6909 | 22.7504 | 22.7363 | 22.9439 | 22.6822 | 22.8104 |
| DARS2   | 21.2938 | 21.0737 | 21.0842 | 21.1525 | 21.0957 | 21.0512 | 20.9977 | 20.8601 | 20.8922 |
| DAXX    | 19.3146 | 18.9062 | 19.0283 | 19.0878 | 18.9876 | 18.6817 | 18.9656 | 18.7186 | 18.5934 |
| DAZAP1  | 21.9394 | 21.5638 | 21.6746 | 21.5066 | 20.7632 | 21.2017 | 21.598  | 21.7475 | 21.7544 |
| DBN1    | 20.7751 | 20.8929 | 20.7011 | 20.8978 | 20.5656 | 20.228  | 20.8558 | 20.7092 | 20.8966 |
| DBNL    | 20.8442 | 20.6477 | 20.4573 | 20.4811 | 20.2732 | 20.5322 | 20.4762 | 20.4705 | 20.7863 |
| DCBLD2  | 18.6654 | 18.3053 | 18.6405 | 18.5289 | 18.3635 | 18.2538 | 18.561  | 18.3724 | 18.3748 |
| DCK     | 19.1798 | 19.2206 | 19.2007 | 18.8841 | 18.84   | 18.972  | 19.0027 | 18.4869 | 18.2214 |
| DCP1A   | 18.2481 | 18.4358 | 18.1113 | 17.9356 | 17.7729 | 17.8142 | 18.0042 | 17.8824 | 17.9212 |
| DCPS    | 20.0657 | 19.9579 | 20.2832 | 19.861  | 19.9181 | 19.9612 | 20.2529 | 19.7631 | 19.8439 |
| DCTN1   | 20.2293 | 19.9328 | 20.1294 | 20.3782 | 20.044  | 19.9921 | 20.5781 | 20.3476 | 20.3857 |
| DCTN2   | 20.36   | 20.2123 | 20.3856 | 20.2369 | 20.1033 | 20.3227 | 20.5994 | 20.3488 | 20.338  |
| DCTN3   | 18.2215 | 19.6136 | 18.0622 | 18.2692 | 18.1914 | 18.3322 | 18.0316 | 18.243  | 18.0903 |
| DCTN4   | 18.793  | 18.2909 | 18.4357 | 18.2615 | 18.3429 | 18.1143 | 18.8062 | 18.3556 | 17.9002 |
| DCUN1D1 | 18.2058 | 18.4843 | 18.3686 | 18.4915 | 18.1328 | 18.5566 | 17.9799 | 18.2374 | 18.2797 |
| DCXR    | 20.9603 | 20.9119 | 20.9963 | 20.97   | 20.8151 | 20.5689 | 20.9232 | 20.7171 | 20.8018 |
| DDB1    | 23.003  | 22.9797 | 22.9664 | 22.8069 | 22.7755 | 22.5952 | 22.8834 | 22.7435 | 23.0094 |
| DDB2    | 20.5474 | 20.3853 | 20.4124 | 20.3086 | 20.1639 | 20.1101 | 20.3358 | 20.1358 | 20.3286 |
| DDOST   | 23.1769 | 23.1328 | 23.1006 | 22.8328 | 22.8172 | 23.1109 | 23.3744 | 23.0175 | 23.0292 |
| DDR GK1 | 17.91   | 16.7298 | 17.9674 | 17.7362 | 17.889  | 18.3063 | 17.927  | 17.7717 | 17.8905 |
| DDT     | 21.0162 | 20.781  | 20.8266 | 21.0979 | 20.8354 | 21.4943 | 21.9656 | 21.3621 | 21.7052 |
| DDX1    | 22.1902 | 22.3543 | 22.3217 | 22.1091 | 22.1359 | 22.2843 | 22.4612 | 22.1435 | 22.2915 |
| DDX17   | 22.9068 | 22.7777 | 22.7295 | 22.8109 | 22.5253 | 22.6517 | 23.0849 | 22.7389 | 22.8319 |
| DDX18   | 21.0226 | 20.8472 | 20.8889 | 20.8072 | 20.7499 | 20.5081 | 20.7538 | 20.6189 | 20.6104 |
| DDX19A  | 22.159  | 20.7731 | 22.6238 | 22.5193 | 22.3417 | 22.4506 | 22.1051 | 22.0847 | 22.5556 |
| DDX20   | 19.4312 | 19.0129 | 19.1467 | 19.1211 | 18.9835 | 19.0891 | 19.3028 | 19.1053 | 19.267  |
| DDX21   | 21.7694 | 22.1283 | 22.2541 | 21.8376 | 21.7316 | 21.754  | 22.1474 | 21.6587 | 21.747  |
| DDX23   | 20.4641 | 20.4616 | 20.585  | 20.353  | 20.2134 | 20.3646 | 20.6931 | 20.336  | 20.1914 |
| DDX24   | 17.1639 | 17.4631 | 17.3629 | 17.1161 | 17.084  | 17.2442 | 17.4265 | 16.9774 | 16.9433 |
| DDX27   | 21.2496 | 21.3915 | 21.4388 | 21.2164 | 21.0319 | 20.977  | 21.3622 | 21.175  | 21.2223 |
| DDX39A  | 22.0913 | 21.6828 | 21.699  | 21.8357 | 21.5699 | 21.648  | 21.3397 | 21.6183 | 21.5019 |
| DDX39B  | 22.798  | 22.2572 | 22.4006 | 22.5307 | 22.1941 | 22.4197 | 22.0244 | 22.4042 | 22.2345 |
| DDX3X   | 22.9172 | 23.1636 | 23.572  | 23.1368 | 23.2114 | 23.2758 | 23.6185 | 23.2939 | 23.3098 |
| DDX41   | 19.6308 | 19.3225 | 19.5995 | 19.0056 | 19.175  | 19.541  | 19.5475 | 19.4768 | 19.1546 |
| DDX42   | 21.2572 | 21.4264 | 21.1208 | 21.1709 | 21.0924 | 20.9869 | 21.1066 | 20.9775 | 21.2895 |
| DDX46   | 22.6821 | 22.7039 | 22.6892 | 22.5112 | 22.4532 | 22.658  | 22.9705 | 22.5907 | 22.7104 |
| DDX47   | 19.9319 | 19.8345 | 19.8235 | 19.833  | 19.6663 | 19.1736 | 19.6266 | 19.7272 | 19.4984 |
| DDX5    | 24.1782 | 24.0876 | 24.1516 | 24.073  | 23.9622 | 23.9947 | 24.4161 | 24.0847 | 24.1996 |
| DDX50   | 17.8354 | 16.6028 | 18.3955 | 18.3466 | 17.8546 | 18.2466 | 18.5624 | 17.9536 | 17.6993 |
| DDX51   | 18.0512 | 19.3531 | 17.8051 | 17.8009 | 17.8015 | 18.0063 | 18.2993 | 17.8043 | 17.882  |
| DDX54   | 18.9528 | 18.6803 | 18.5708 | 18.8282 | 18.78   | 19.3307 | 19.4658 | 18.8245 | 18.856  |
| DDX56   | 19.8335 | 20.3038 | 20.2479 | 20.0622 | 19.966  | 19.9796 | 20.5681 | 20.1429 | 20.0393 |
| DDX6    | 21.6688 | 21.435  | 21.3578 | 21.1779 | 21.2031 | 21.5587 | 21.8067 | 21.6545 | 21.6624 |
| DECR2   | 13.2773 | 14.2982 | 14.4842 | 15.607  | 13.282  | 13.1634 | ?       | 11.4362 | 13.7922 |
| DEK     | 21.3187 | 21.2139 | 21.0897 | 21.2011 | 20.8583 | 21.2231 | 20.9242 | 21.1289 | 21.3978 |
| DEPDC7  | 19.0763 | 18.8701 | 18.8599 | 18.7707 | 18.8332 | 18.9356 | 19.2462 | 19.0324 | 18.7724 |
| DERA    | 18.4484 | 18.1198 | 18.2671 | 18.5473 | 18.1809 | 17.9612 | 18.4984 | 18.3586 | 18.244  |
| DFFA    | 19.1364 | 18.631  | 18.5358 | 18.5566 | 18.6319 | 18.6399 | 18.8107 | 18.5703 | 18.4117 |
| DFNA5   | 18.5156 | 18.1893 | 18.6449 | 18.2067 | 18.2827 | 18.2747 | 18.9041 | 18.462  | 18.4586 |
| DGCR14  | 17.7165 | 18.8564 | 18.3654 | 18.6658 | 18.2821 | 18.4209 | 18.7531 | 18.4086 | 18.4817 |
| DHCR24  | 20.3082 | 20.5153 | 20.3894 | 20.2949 | 20.3209 | 20.6568 | 20.8203 | 20.7735 | 20.8038 |

|         |         |         |         |         |         |         |         |         |         |
|---------|---------|---------|---------|---------|---------|---------|---------|---------|---------|
| DHCR7   | 19.0876 | 20.0462 | 19.0916 | 19.1847 | 19.0702 | 18.8344 | 19.2097 | 18.7611 | 19.145  |
| DHFR    | 20.3063 | 19.0642 | 20.274  | 20.2414 | 20.0226 | 20.2135 | 20.4125 | 19.8378 | 20.1912 |
| DHPS    | 19.029  | 18.602  | 18.7062 | 18.5335 | 18.4665 | 19.2276 | 19.1606 | 19.3209 | 19.5017 |
| DHRS7   | 18.8713 | 19.1805 | 18.8323 | 18.8088 | 18.8624 | 19.073  | 19.2311 | 18.9353 | 18.9398 |
| DHTKD1  | 16.8654 | 17.8236 | 17.6734 | 18.1261 | 17.6838 | 16.6615 | 17.1925 | 16.6533 | 17.0814 |
| DHX15   | 22.6342 | 22.8055 | 23.0091 | 22.6664 | 22.6236 | 22.413  | 22.9342 | 22.6455 | 22.7779 |
| DHX16   | 19.4442 | 19.1662 | 19.1643 | 19.0521 | 19.2934 | 19.1854 | 19.3259 | 19.2365 | 19.2888 |
| DHX29   | 16.974  | 17.1748 | 17.2345 | 17.0322 | 17.0993 | 16.7086 | 17.6126 | 16.9853 | 16.8708 |
| DHX30   | 20.2214 | 20.3009 | 20.2893 | 20.1386 | 20.0515 | 20.0394 | 20.4248 | 19.9492 | 20.0627 |
| DHX36   | 18.4547 | 18.5665 | 18.5058 | 18.1495 | 18.5166 | 18.2256 | 18.4655 | 18.4769 | 18.0613 |
| DHX38   | 18.8971 | 18.4069 | 18.4023 | 18.4374 | 18.3746 | 17.1902 | 18.3048 | 18.3059 | 18.1904 |
| DHX40   | 16.3211 | 16.5269 | 15.595  | 16.5612 | 16.9165 | 6.86874 | 14.6042 | 16.2372 | 14.7951 |
| DHX9    | 24.4528 | 24.3744 | 24.2941 | 24.1702 | 24.0305 | 23.9987 | 24.502  | 24.1348 | 24.4779 |
| DIABLO  | 23.2136 | 23.4705 | 23.4874 | 23.367  | 23.1261 | 23.4652 | 23.6539 | 23.3197 | 23.5717 |
| DIAPH1  | 20.427  | 20.0757 | 20.1803 | 20.0243 | 19.9101 | 19.9308 | 20.3697 | 19.9955 | 20.0228 |
| DIDO1   | 18.7022 | 18.9206 | 18.5008 | 18.2888 | 18.899  | 18.8029 | 18.9252 | 18.621  | 18.8644 |
| DIEXF   | 18.0188 | 18.6794 | 18.8297 | 18.4477 | 18.622  | 17.9543 | 18.7841 | 18.441  | 18.5602 |
| DIMT1   | 18.7254 | 18.368  | 18.4065 | 17.8101 | 18.1768 | 17.8791 | 18.7021 | 18.1299 | 18.2727 |
| DIP2B   | 17.4057 | 17.9351 | 17.8609 | 17.5846 | 17.3061 | 16.3251 | 17.6629 | 17.4113 | 17.5411 |
| DIS3    | 20.0738 | 20.4658 | 20.4255 | 20.1647 | 20.0598 | 19.8799 | 20.313  | 20.1755 | 20.3662 |
| DKC1    | 19.7085 | 19.5224 | 19.8561 | 19.8855 | 19.7127 | 19.3994 | 19.7465 | 19.4873 | 19.4436 |
| DLAT    | 18.2966 | 17.3819 | 18.2607 | 19.0287 | 18.4367 | 18.5013 | 18.7508 | 18.4054 | 18.5301 |
| DLD     | 21.8948 | 21.6476 | 21.7664 | 21.6514 | 21.6134 | 21.6722 | 21.9794 | 21.8881 | 21.9473 |
| DLST    | 21.4002 | 21.796  | 21.6838 | 21.5129 | 21.6517 | 21.7962 | 21.9208 | 21.7006 | 21.9004 |
| DNAJA1  | 22.1129 | 21.4141 | 22.1434 | 21.9456 | 21.7705 | 22.0038 | 22.1299 | 21.9534 | 21.9644 |
| DNAJA2  | 20.8273 | 20.5183 | 20.8348 | 20.5343 | 20.6072 | 21.0269 | 21.8387 | 20.7597 | 20.8074 |
| DNAJA3  | 20.3629 | 20.2112 | 20.2289 | 20.0239 | 20.0014 | 20.5358 | 20.7366 | 20.4729 | 20.4169 |
| DNAJB1  | 21.7269 | 21.7921 | 21.8344 | 21.6763 | 21.5022 | 22.1274 | 22.3738 | 21.8317 | 22.0952 |
| DNAJB11 | 21.1884 | 20.6849 | 20.8907 | 20.6158 | 20.7411 | 21.0176 | 20.8855 | 21.0058 | 21.0676 |
| DNAJB6  | 19.5448 | 19.2615 | 19.1997 | 19.1591 | 18.9578 | 19.3158 | 19.5348 | 19.2258 | 19.535  |
| DNAJC10 | 15.7456 | 16.9146 | 16.1093 | 16.0925 | 16.4647 | 15.4271 | 16.0735 | 16.1787 | 16.1004 |
| DNAJC11 | 19.0449 | 18.9864 | 18.9563 | 18.743  | 18.786  | 18.6145 | 18.7014 | 18.675  | 18.9693 |
| DNAJC13 | 18.2738 | 17.7214 | 17.8607 | 17.6636 | 17.8058 | 17.1661 | 18.1879 | 17.8996 | 17.7777 |
| DNAJC3  | 19.0964 | 19.6066 | 19.1992 | 19.1035 | 19.0632 | 19.2145 | 19.082  | 19.2034 | 19.138  |
| DNAJC5  | 18.4325 | 17.8006 | 17.8431 | 18.2173 | 17.9196 | 17.1275 | 17.3668 | 17.8696 | 17.8967 |
| DNAJC7  | 20.5084 | 20.6483 | 20.3636 | 20.3019 | 20.0883 | 20.0851 | 20.2549 | 20.2025 | 20.4857 |
| DNAJC8  | 21.5225 | 21.9982 | 21.3739 | 21.6799 | 21.5026 | 21.7982 | 22.0039 | 21.6239 | 21.8819 |
| DNAJC9  | 20.2695 | 21.7739 | 20.0834 | 20.2162 | 20.1339 | 21.3097 | 20.1254 | 20.1341 | 20.1091 |
| DNM1L   | 21.1114 | 21.0211 | 21.0683 | 20.831  | 20.7739 | 21.083  | 20.8568 | 20.7881 | 20.8634 |
| DNM2    | 19.7035 | 19.4814 | 19.5514 | 19.5819 | 19.055  | 19.2699 | 19.6974 | 19.6414 | 19.6294 |
| DNMBP   | 13.8737 | 14.0206 | 14.193  | 12.9598 | 14.0021 | 14.4307 | 13.8112 | 14.7757 | 13.3501 |
| DNMT1   | 19.7075 | 19.5417 | 19.6831 | 19.5242 | 19.2047 | 19.3527 | 19.5011 | 19.299  | 19.3754 |
| DNTTIP2 | 19.4242 | 18.6617 | 18.9472 | 18.6008 | 18.9674 | 19.3428 | 19.5271 | 19.2176 | 18.8687 |
| DOCK5   | 18.6561 | 19.2255 | 18.8924 | 19.0124 | 18.8596 | 18.4827 | 18.7815 | 18.958  | 19.1461 |
| DOCK7   | 18.9456 | 18.9845 | 19.0277 | 18.918  | 18.9031 | 18.1559 | 18.828  | 18.5863 | 18.8091 |
| DOK1    | 17.6942 | 17.4788 | 17.9998 | 17.6463 | 17.8565 | 17.8741 | 17.6187 | 18.0075 | 17.3834 |
| DPH5    | 19.175  | 19.2579 | 19.1719 | 19.2269 | 19.4845 | 19.818  | 19.08   | 19.4333 | 18.7358 |
| DPM1    | 21.6696 | 21.4167 | 21.2619 | 21.1738 | 21.2068 | 21.0001 | 21.3066 | 21.1637 | 21.2268 |
| DPP3    | 21.1763 | 21.7206 | 20.8715 | 20.678  | 20.6562 | 20.8087 | 21.1442 | 20.791  | 20.918  |
| DPYSL2  | 23.6065 | 23.2054 | 23.5455 | 23.2267 | 23.3114 | 23.085  | 23.3829 | 23.0433 | 23.0424 |
| DPYSL3  | 21.6944 | 21.872  | 21.8062 | 21.7703 | 21.4736 | 22.0633 | 22.2589 | 21.9477 | 22.1248 |
| DRAP1   | 19.22   | 19.5218 | 19.3118 | 19.4381 | 19.2031 | 19.1671 | 19.4943 | 19.3183 | 19.5347 |
| DRG1    | 20.1668 | 20.444  | 20.4828 | 20.218  | 20.3695 | 20.4092 | 20.8564 | 20.4198 | 20.2743 |
| DSG2    | 19.2053 | 18.7872 | 18.8597 | 18.9047 | 18.7025 | 17.7544 | 18.5339 | 18.3973 | 18.5468 |
| DSP     | 18.9143 | ?       | 13.3494 | 14.0956 | 12.8203 | 4.54654 | 7.6474  | 11.6136 | 11.8312 |
| DSTN    | 22.4557 | 21.1749 | 22.4561 | 22.5323 | 22.217  | 22.6017 | 22.4031 | 22.3261 | 22.4992 |

|          |         |         |         |         |         |         |         |         |         |
|----------|---------|---------|---------|---------|---------|---------|---------|---------|---------|
| DTD1     | 21.0373 | 20.8565 | 21.0448 | 20.7886 | 20.5561 | 20.8092 | 21.0138 | 21.2802 | 21.1355 |
| DTYMK    | 21.2908 | 21.595  | 21.3423 | 21.2791 | 21.1269 | 21.4036 | 21.6598 | 21.3242 | 21.354  |
| DUS3L    | 15.767  | 16.5201 | 17.1581 | 17.5185 | 17.2476 | 16.5008 | 16.7311 | 16.935  | 16.6266 |
| DUSP12   | 18.6568 | 18.6017 | 18.8262 | 18.6151 | 18.4048 | 18.8949 | 18.7287 | 18.5975 | 18.7738 |
| DUT      | 22.8997 | 22.6004 | 22.7948 | 22.8416 | 22.7815 | 22.7888 | 22.5176 | 22.6387 | 22.7745 |
| DYNC1H1  | 21.7126 | 24.3149 | 21.5313 | 21.4922 | 21.4129 | 21.5962 | 21.8644 | 21.7084 | 21.759  |
| DYNC1I2  | 21.4182 | 21.2101 | 21.1752 | 21.4683 | 21.1347 | 21.2183 | 21.2017 | 21.3136 | 21.5136 |
| DYNC1LI1 | 21.3832 | 20.9677 | 21.2816 | 21.2748 | 21.1829 | 21.021  | 21.2763 | 20.9721 | 21.207  |
| DYNC1LI2 | 20.5106 | 20.3949 | 20.5411 | 20.3807 | 20.5516 | 20.9272 | 21.1113 | 20.7213 | 20.7998 |
| DYNLL1   | 21.927  | 20.7604 | 21.8337 | 21.979  | 21.7507 | 22.2493 | 21.9905 | 21.962  | 22.0845 |
| DYNLRB1  | 19.5003 | 19.2449 | 19.0983 | 19.4625 | 19.3623 | 20.0256 | 20.0126 | 20.0255 | 19.9222 |
| DYNLT1   | 17.7882 | 17.7871 | 17.8799 | 18.1604 | 17.9874 | 18.5695 | 18.2548 | 18.154  | 18.1391 |
| EBNA1BP2 | 20.4364 | 19.3001 | 20.2001 | 20.39   | 20.1012 | 20.4762 | 20.5366 | 20.0999 | 20.2126 |
| EBP      | 17.784  | 16.8021 | 17.4502 | 17.8476 | 17.7111 | 17.6324 | 17.8038 | 17.8866 | 18.0557 |
| ECE1     | 20.4971 | 20.327  | 20.3326 | 20.365  | 20.1537 | 19.9206 | 20.4973 | 20.0871 | 20.1535 |
| ECH1     | 21.8151 | 21.7431 | 21.7719 | 21.6478 | 21.4793 | 21.5994 | 21.7675 | 21.6158 | 21.8045 |
| ECHDC1   | 18.697  | 18.6266 | 18.2068 | 18.8759 | 18.4214 | 17.3898 | 17.4255 | 18.0444 | 17.8311 |
| ECHS1    | 21.1422 | 21.4116 | 21.0924 | 21.1785 | 21.1146 | 21.3527 | 21.6336 | 21.022  | 21.4012 |
| ECM29    | 20.5539 | 20.2868 | 20.3499 | 20.2208 | 19.9803 | 20.0037 | 20.4914 | 20.1502 | 20.3105 |
| ECSIT    | 15.5919 | 15.1913 | 15.4459 | 15.7772 | 15.5993 | 15.7654 | 15.5859 | 15.4879 | 15.1992 |
| EDC3     | 18.9523 | 18.9155 | 18.668  | 18.3046 | 18.5799 | 18.6877 | 19.4295 | 18.7231 | 18.8502 |
| EDC4     | 19.975  | 19.7608 | 19.7346 | 19.6297 | 19.5778 | 20.0099 | 19.9942 | 19.7138 | 19.7152 |
| EEA1     | 19.3531 | 18.7783 | 19.3202 | 19.4441 | 19.1706 | 18.8468 | 19.0677 | 18.8568 | 19.2106 |
| EED      | 17.2353 | 16.5756 | 16.5067 | 16.0724 | 16.234  | 16.4087 | 16.7417 | 16.4766 | 15.8369 |
| EEF1A1   | 27.9784 | 27.567  | 27.7861 | 27.6832 | 27.6999 | 27.3739 | 27.6828 | 27.4197 | 27.5505 |
| EEF1B2   | 24.1122 | 24.1965 | 24.2756 | 24.3728 | 24.1752 | 24.3197 | 24.544  | 24.1703 | 24.4702 |
| EEF1D    | 24.5668 | 24.6134 | 24.8738 | 24.5599 | 24.5889 | 24.5567 | 24.9585 | 24.5756 | 24.7656 |
| EEF1E1   | 16.9284 | 15.4227 | 16.2222 | 17.34   | 16.5492 | 17.4214 | 16.8993 | 17.1887 | 17.0873 |
| EEF1G    | 25.2146 | 25.3018 | 25.2498 | 25.2148 | 25.1012 | 25.0962 | 25.4977 | 25.2571 | 25.2901 |
| EEF2     | 26.1927 | 26.1021 | 26.3759 | 26.1155 | 25.9726 | 26.0671 | 26.4936 | 26.1257 | 26.2422 |
| EFHD2    | 20.7432 | 20.5343 | 20.6864 | 20.4399 | 20.7105 | 20.7896 | 21.2623 | 20.7951 | 20.8534 |
| EFTUD1   | 17.1292 | 17.8666 | 17.6605 | 17.7451 | 16.8718 | 16.8677 | 18.1618 | 17.0493 | 17.3958 |
| EFTUD2   | 22.322  | 22.3013 | 22.4112 | 22.1736 | 22.0454 | 22.0327 | 22.64   | 22.2709 | 22.4622 |
| EGFR     | 17.9242 | 17.832  | 17.5448 | 17.6861 | 17.288  | 17.2756 | 18.0327 | 17.5301 | 17.8003 |
| EHBP1L1  | 17.4999 | 17.5896 | 17.8216 | 17.6555 | 18.0312 | 17.0107 | 18.0357 | 17.404  | 17.0001 |
| EHD1     | 21.6789 | 21.7149 | 21.7025 | 21.6048 | 21.3358 | 21.7838 | 22.0201 | 21.6136 | 21.8505 |
| EHD4     | 21.6372 | 20.9753 | 21.6154 | 21.5288 | 21.3668 | 21.7929 | 22.3252 | 21.7109 | 21.8082 |
| EIF1     | 21.1867 | 20.972  | 20.7439 | 21.3354 | 20.7608 | 20.706  | 20.7226 | 20.669  | 20.812  |
| EIF1AY   | 19.9741 | 19.828  | 19.9948 | 19.7434 | 20.3979 | 20.8075 | 20.6682 | 20.1412 | 19.7755 |
| EIF2A    | 20.5499 | 20.7792 | 20.7905 | 20.5695 | 20.5583 | 20.5114 | 20.8478 | 20.5571 | 20.7105 |
| EIF2AK2  | 19.9978 | 19.9643 | 20.0319 | 19.9941 | 19.6504 | 19.6572 | 19.6066 | 19.7768 | 19.99   |
| EIF2AK4  | 19.1497 | 19.1478 | 19.2607 | 18.7934 | 19.0163 | 17.8585 | 18.743  | 18.4115 | 18.412  |
| EIF2B1   | 20.915  | 20.876  | 21.2076 | 21.0658 | 20.7845 | 20.9749 | 21.3316 | 20.9719 | 20.9071 |
| EIF2B2   | 18.7027 | 18.6545 | 18.7035 | 18.54   | 18.7989 | 19.2116 | 19.2705 | 18.7839 | 18.9107 |
| EIF2B3   | 20.0808 | 19.6412 | 19.7554 | 19.8339 | 19.7951 | 19.9129 | 19.7777 | 19.8374 | 19.6704 |
| EIF2B4   | 19.4109 | 19.561  | 19.3136 | 19.4431 | 19.7114 | 19.5698 | 19.6753 | 19.5175 | 19.4614 |
| EIF2B5   | 20.106  | 19.9376 | 19.8617 | 20.1415 | 20.0675 | 19.7201 | 19.7984 | 19.7055 | 20.0588 |
| EIF2C2   | 19.9606 | 19.9707 | 20.4577 | 19.2726 | 20.4046 | 20.6759 | 19.8873 | 20.3103 | 19.8446 |
| EIF2S1   | 22.6109 | 22.4823 | 22.8706 | 22.7394 | 22.6365 | 22.9647 | 23.1459 | 22.7427 | 23.0387 |
| EIF2S2   | 22.1006 | 22.2155 | 22.2805 | 22.1708 | 22.1808 | 22.5259 | 22.7268 | 22.333  | 22.5453 |
| EIF2S3   | 22.7374 | 22.8679 | 22.6021 | 22.8685 | 22.521  | 22.8453 | 22.9961 | 23.0092 | 23.0621 |
| EIF3A    | 22.5489 | 22.1523 | 22.634  | 22.489  | 22.3448 | 22.419  | 22.5943 | 22.407  | 22.5857 |
| EIF3B    | 23.1442 | 22.8511 | 22.9211 | 22.7606 | 22.6128 | 22.7231 | 22.7217 | 22.9    | 23.0009 |
| EIF3C    | 22.4374 | 22.2636 | 22.4561 | 22.146  | 22.1717 | 22.2333 | 22.5564 | 22.3568 | 22.4905 |
| EIF3D    | 22.4789 | 22.2967 | 22.2483 | 22.3226 | 22.1034 | 22.114  | 22.1309 | 21.9999 | 22.1977 |
| EIF3E    | 22.1228 | 21.6607 | 22.2224 | 22.0047 | 22.041  | 22.1298 | 22.3775 | 22.0198 | 22.3457 |

|         |         |         |         |         |         |         |         |         |         |
|---------|---------|---------|---------|---------|---------|---------|---------|---------|---------|
| EIF3F   | 22.734  | 22.5073 | 22.5227 | 22.5833 | 22.4165 | 22.3085 | 22.4135 | 22.4409 | 22.4051 |
| EIF3G   | 21.9072 | 21.8071 | 21.9218 | 22.1023 | 21.7313 | 22.139  | 21.6587 | 21.7736 | 22.0913 |
| EIF3H   | 22.5312 | 22.8341 | 22.3471 | 22.2589 | 22.1432 | 22.2445 | 22.5798 | 22.2024 | 22.4873 |
| EIF3I   | 22.8861 | 22.28   | 22.301  | 22.4329 | 22.1571 | 22.2484 | 22.0649 | 22.4092 | 22.3745 |
| EIF3J   | 21.9428 | 21.2305 | 21.4526 | 21.7499 | 21.39   | 21.4773 | 21.4714 | 21.4137 | 21.8091 |
| EIF3K   | 22.5976 | 22.6798 | 22.6817 | 22.5853 | 22.4588 | 22.5721 | 22.6793 | 22.5273 | 22.5785 |
| EIF3L   | 22.1095 | 20.7389 | 22.1713 | 22.3715 | 22.1413 | 22.0978 | 22.2514 | 21.9935 | 22.171  |
| EIF3M   | 22.0494 | 22.0716 | 22.1372 | 22.0213 | 21.8507 | 21.8869 | 22.0429 | 21.9182 | 21.9434 |
| EIF4A1  | 25.123  | 25.0639 | 24.972  | 25.0857 | 24.7981 | 24.9482 | 25.2605 | 25.042  | 25.1945 |
| EIF4A2  | 20.3999 | 20.4672 | 20.1573 | 20.3968 | 20.126  | 19.9691 | 20.341  | 20.3833 | 20.3257 |
| EIF4A3  | 22.1818 | 22.029  | 22.1234 | 22.1182 | 21.9497 | 22.0866 | 22.0326 | 22.0399 | 22.2314 |
| EIF4B   | 21.8622 | 19.987  | 21.8206 | 21.8803 | 21.6974 | 22.2318 | 22.5787 | 21.8731 | 22.2334 |
| EIF4E   | 21.6611 | 21.7163 | 21.8189 | 21.6434 | 21.3275 | 21.571  | 21.5943 | 21.5379 | 21.801  |
| EIF4G1  | 21.4855 | 22.0222 | 21.5294 | 21.5532 | 21.4601 | 21.5387 | 21.7548 | 21.4841 | 21.7556 |
| EIF4G2  | 21.6984 | 21.5833 | 21.5203 | 22.0155 | 21.4955 | 21.4193 | 21.3928 | 21.1401 | 21.572  |
| EIF4G3  | 17.6323 | 17.1726 | 17.223  | 16.9463 | 16.7646 | 16.82   | 16.8407 | 16.8622 | 16.8375 |
| EIF4H   | 22.2664 | 21.9066 | 21.4188 | 21.7295 | 21.5026 | 21.7943 | 22.2279 | 22.1371 | 22.26   |
| EIF5    | 22.4934 | 22.2524 | 22.3101 | 22.2203 | 22.0531 | 22.232  | 22.3538 | 22.3048 | 22.3853 |
| EIF5A   | 24.4536 | 24.2027 | 24.3983 | 24.3861 | 24.1515 | 24.3931 | 24.3374 | 24.0829 | 24.1119 |
| EIF5B   | 21.8489 | 21.7354 | 21.5459 | 21.6845 | 21.4799 | 21.4869 | 21.4181 | 21.5095 | 21.6848 |
| EIF6    | 23.5356 | 23.4828 | 23.5985 | 23.6716 | 23.4376 | 23.7071 | 23.8362 | 23.5172 | 23.8932 |
| ELAC2   | 19.0594 | 19.2345 | 19.2568 | 19.1095 | 18.9557 | 18.5911 | 19.2522 | 19.0791 | 19.342  |
| ELAVL1  | 22.6842 | 22.5744 | 22.6236 | 22.5906 | 22.3782 | 22.6373 | 22.9299 | 22.561  | 22.6332 |
| ELMO2   | 18.3631 | 17.9836 | 17.9517 | 18.218  | 18.0926 | 18.1705 | 17.7245 | 18.0403 | 17.4871 |
| ELP3    | 17.7325 | 17.7291 | 17.7078 | 17.7055 | 17.6242 | 15.8141 | 17.2621 | 17.6397 | 16.9338 |
| EMC1    | 20.2762 | 19.9048 | 20.0928 | 20.498  | 20.3284 | 20.1493 | 20.4354 | 20.2228 | 20.4007 |
| EMC10   | 18.185  | 17.1462 | 17.1007 | 17.2676 | 17.6923 | 16.2205 | 17.6413 | 17.7574 | 17.6897 |
| EMC2    | 18.7509 | 18.7955 | 18.8669 | 18.6754 | 18.5991 | 18.7312 | 18.5525 | 19.001  | 19.1349 |
| EMC3    | 21.0429 | 19.6401 | 18.6523 | 18.6479 | 18.3118 | 18.7993 | 18.476  | 18.8631 | 18.5872 |
| EMC7    | 20.4299 | 20.2021 | 20.1176 | 20.2244 | 20.1403 | 20.2872 | 20.4036 | 20.3335 | 20.1513 |
| EMD     | 20.3338 | 19.2832 | 20.3458 | 20.5002 | 20.3351 | 20.5453 | 20.9108 | 20.3023 | 20.8575 |
| EMG1    | 22.0031 | 21.6135 | 21.8661 | 21.6622 | 21.7192 | 21.7996 | 21.8793 | 21.7221 | 21.7536 |
| EML2    | 17.8015 | 15.8255 | 16.7282 | 16.835  | 17.0989 | 16.9229 | 16.9674 | 17.3141 | 17.1407 |
| EML4    | 18.1171 | 18.4764 | 18.7114 | 18.484  | 18.2574 | 18.3109 | 18.481  | 18.2997 | 18.6228 |
| ENAH    | 19.7913 | 18.3711 | 19.8931 | 19.2497 | 19.8702 | 19.8766 | 20.5144 | 19.9334 | 20.1998 |
| ENDOD1  | 17.6164 | 16.9418 | 17.0281 | 17.3659 | 16.9615 | 17.3521 | 17.1432 | 16.9926 | 17.1233 |
| ENO1    | 26.7595 | 26.5987 | 26.8233 | 26.6516 | 26.4845 | 26.8506 | 27.0947 | 26.8406 | 26.7791 |
| ENO2    | 19.1731 | 19.3042 | 19.5149 | 19.1096 | 19.3917 | 19.6335 | 19.8399 | 19.5431 | 19.3918 |
| ENOPH1  | 20.1844 | 19.77   | 19.5541 | 19.8856 | 19.5941 | 19.3214 | 18.935  | 19.4719 | 19.6865 |
| EPB41L2 | 21.2476 | 20.8846 | 21.0239 | 20.8158 | 20.8295 | 20.8194 | 21.0277 | 20.8959 | 20.8486 |
| EPHA2   | 19.3545 | 19.398  | 19.2357 | 19.1225 | 18.8542 | 19.0422 | 19.3557 | 19.3027 | 19.548  |
| EPHX1   | 21.4545 | 21.408  | 21.2312 | 21.1831 | 21.224  | 21.3863 | 21.6251 | 21.5063 | 21.4261 |
| EPRS    | 22.1248 | 21.8619 | 22.0501 | 22.0078 | 21.9964 | 22.0476 | 22.3249 | 22.0893 | 22.0766 |
| EPS15   | 17.5521 | 17.6993 | 17.6013 | 17.6511 | 17.5404 | 17.501  | 17.7826 | 17.883  | 18.1307 |
| EPS15L1 | 18.7926 | 18.7907 | 18.6715 | 18.6109 | 18.4221 | 18.8339 | 18.82   | 18.7624 | 18.8925 |
| EPS8    | 20.1885 | 19.9425 | 20.0807 | 19.9988 | 19.9166 | 19.1909 | 19.7927 | 19.6222 | 19.7376 |
| ERAP1   | 21.2588 | 19.849  | 21.6672 | 21.5991 | 21.7744 | 21.727  | 22.1959 | 21.4438 | 21.861  |
| ERBB2   | 17.9513 | 17.4878 | 16.752  | 17.6224 | 16.6806 | 17.4857 | 17.7794 | 18.1754 | 18.4386 |
| ERC1    | 18.8297 | 18.2612 | 18.5641 | 18.0916 | 18.1856 | 18.3339 | 17.8037 | 18.4936 | 18.618  |
| ERCC6L  | 18.1955 | 17.8831 | 17.7685 | 17.1123 | 17.3744 | 17.5667 | 17.3341 | 17.5035 | 17.3638 |
| ERGIC1  | 19.6855 | 19.7504 | 19.8525 | 19.7924 | 19.7052 | 19.6606 | 19.846  | 19.5859 | 19.5682 |
| ERGIC2  | 18.2922 | 18.3483 | 18.3135 | 18.5945 | 18.3087 | 17.7968 | 18.0927 | 18.2902 | 17.7053 |
| ERGIC3  | 19.3164 | 19.1806 | 19      | 19.0342 | 19.0865 | 18.9854 | 19.1551 | 19.1846 | 19.1893 |
| ERH     | 20.5709 | 20.4978 | 20.5386 | 20.7038 | 20.5596 | 20.3874 | 20.5518 | 20.3366 | 20.9924 |
| ERLEC1  | 18.6609 | 18.1927 | 18.1995 | 18.3066 | 18.1432 | 18.2007 | 17.9471 | 18.04   | 17.9788 |
| ERLIN1  | 18.5492 | 16.5678 | 18.01   | 18.3024 | 18.2535 | 18.9221 | 18.5908 | 18.3759 | 18.6365 |

|          |         |         |         |         |         |         |         |         |         |
|----------|---------|---------|---------|---------|---------|---------|---------|---------|---------|
| ERLIN2   | 19.5036 | 17.5777 | 19.3022 | 19.4901 | 19.2683 | 19.4737 | 19.4101 | 19.4274 | 18.9328 |
| ERO1L    | 21.0297 | 20.4467 | 20.7323 | 20.9612 | 20.806  | 20.8324 | 21.2676 | 21.007  | 21.341  |
| ERP29    | 23.7594 | 23.6595 | 23.6233 | 23.4567 | 23.4231 | 23.7684 | 24.1532 | 23.5773 | 23.7255 |
| ERP44    | 22.2028 | 21.8844 | 21.7917 | 21.5988 | 21.7197 | 21.9081 | 22.2769 | 21.9788 | 22.0347 |
| ESD      | 21.0059 | 19.0068 | 20.8801 | 20.9255 | 20.8528 | 20.6991 | 21.2077 | 20.9868 | 21.1291 |
| ESF1     | 17.6412 | 17.4286 | 17.1664 | 17.3995 | 17.3471 | 17.1496 | 17.7762 | 17.4961 | 17.3135 |
| ESYT1    | 21.8402 | 21.5597 | 22.0507 | 21.6965 | 21.7961 | 21.662  | 22.1357 | 21.8741 | 22.0924 |
| ESYT2    | 19.1633 | 18.967  | 19.233  | 19.087  | 19.1308 | 19.1417 | 19.0627 | 18.9883 | 18.916  |
| ETF1     | 22.4387 | 22.3685 | 22.3703 | 22.2663 | 22.0213 | 22.0019 | 22.2677 | 22.0839 | 22.3718 |
| ETFA     | 22.2272 | 22.1147 | 22.3057 | 21.9942 | 21.8821 | 22.201  | 22.3306 | 22.1481 | 22.0722 |
| ETFB     | 22.0435 | 21.8379 | 22.0736 | 22.0684 | 21.9359 | 22.2423 | 22.3414 | 21.8823 | 22.0759 |
| ETHE1    | 19.9333 | 19.9389 | 19.9438 | 19.969  | 19.8149 | 20.0545 | 20.2954 | 19.9382 | 20.1607 |
| EWSR1    | 21.828  | 21.9639 | 22.048  | 21.8828 | 21.7972 | 22.21   | 22.4527 | 21.9073 | 22.104  |
| EXOC1    | 18.1403 | 18.2425 | 18.2981 | 18.0254 | 18.22   | 17.9336 | 17.6176 | 17.9027 | 17.8148 |
| EXOC2    | 19.2535 | 18.763  | 18.7327 | 18.3592 | 18.6157 | 18.7956 | 19.2164 | 18.8293 | 18.7513 |
| EXOC3    | 18.4883 | 18.3881 | 18.1916 | 18.3168 | 17.9718 | 18.0143 | 18.4706 | 18.4047 | 18.4242 |
| EXOC4    | 17.3823 | 17.4817 | 17.8536 | 17.2695 | 17.3205 | 17.0281 | 18.0882 | 17.7941 | 17.8321 |
| EXOC5    | 17.557  | 17.3391 | 17.646  | 17.3775 | 17.1455 | 16.9927 | 17.2884 | 17.4223 | 17.6076 |
| EXOC7    | 18.111  | 18.1019 | 17.9673 | 18.0482 | 18.1517 | 17.749  | 18.1245 | 17.8033 | 17.9631 |
| EXOC8    | 16.7161 | 17.4927 | 17.153  | 17.0822 | 16.9316 | 17.8183 | 17.2569 | 16.9389 | 17.4433 |
| EXOSC1   | 17.9744 | 17.86   | 18.2899 | 18.3075 | 17.8848 | 18.4066 | 18.4688 | 18.3812 | 18.3566 |
| EXOSC10  | 20.5348 | 20.4914 | 20.4392 | 20.4247 | 20.2009 | 20.1895 | 20.3748 | 20.5399 | 20.368  |
| EXOSC2   | 21.1591 | 20.5826 | 20.5054 | 20.6489 | 20.4888 | 20.5067 | 20.8541 | 20.6424 | 20.6661 |
| EXOSC3   | 20.0053 | 19.5302 | 19.5105 | 19.579  | 19.7218 | 19.6977 | 18.746  | 19.8569 | 19.4218 |
| EXOSC4   | 19.2645 | 19.6096 | 19.1172 | 19.1911 | 18.9569 | 19.2719 | 19.6759 | 19.294  | 19.53   |
| EXOSC5   | 19.4832 | 19.684  | 19.6258 | 19.5863 | 19.527  | 19.7796 | 20.0934 | 19.5755 | 19.8248 |
| EXOSC6   | 19.7095 | 21.6746 | 19.3831 | 19.8432 | 19.5424 | 19.8005 | 19.8028 | 19.8614 | 20.111  |
| EXOSC7   | 21.0492 | 21.2644 | 20.7669 | 20.8003 | 20.4889 | 20.9455 | 20.9161 | 20.7054 | 21.2047 |
| EXOSC8   | 20.3085 | 20.2359 | 20.3357 | 20.0994 | 20.1263 | 20.3975 | 20.3485 | 20.4699 | 20.7233 |
| EXOSC9   | 21.0305 | 20.8488 | 20.7493 | 20.6487 | 20.5925 | 20.6061 | 21.0878 | 20.9053 | 21.0268 |
| EZR      | 21.6925 | 21.8636 | 21.6381 | 21.5645 | 21.3683 | 21.5692 | 21.7237 | 21.5176 | 21.7721 |
| FABP5    | 19.9815 | 12.6959 | 11.8071 | 12.858  | 12.546  | 11.2668 | 9.98971 | 11.4127 | 13.2684 |
| FADS2    | 19.195  | 19.108  | 18.8964 | 18.8345 | 18.7225 | 18.8651 | 19.2608 | 18.9936 | 19.0076 |
| FAF2     | 20.1875 | 19.9415 | 20.0886 | 19.9042 | 20.1361 | 19.9102 | 20.4325 | 20.0537 | 20.2324 |
| FAH      | 16.928  | 17.0595 | 17.1254 | 17.3345 | 17.415  | 17.5562 | 18.1432 | 17.5701 | 17.5954 |
| FAHD1    | 18.1227 | 18.2645 | 17.9156 | 17.9716 | 17.9433 | 18.2144 | 17.8024 | 17.904  | 18.0925 |
| FAHD2A   | 19.1909 | 18.9364 | 18.9974 | 19.2485 | 18.9707 | 19.6118 | 19.6342 | 19.4979 | 19.6191 |
| FAM114A1 | 17.0009 | 17.0751 | 18.1895 | 17.298  | 17.388  | 17.3634 | 17.65   | 17.2245 | 17.384  |
| FAM115A  | 18.8817 | 18.8751 | 19.2045 | 19.0456 | 19.0971 | 19.0613 | 19.3507 | 19.1832 | 19.1856 |
| FAM120A  | 19.8874 | 19.9472 | 20.0013 | 19.5113 | 19.7356 | 19.6259 | 20.1282 | 19.9707 | 19.8554 |
| FAM120C  | 19.2811 | 18.7907 | 18.3981 | 18.6275 | 17.7192 | 18.2676 | 19.1367 | 18.871  | 18.8755 |
| FAM126A  | 16.9981 | 17.5261 | 17.4997 | 17.4133 | 17.7132 | 17.7505 | 17.031  | 17.282  | 17.1505 |
| FAM129A  | 21.4638 | 21.3988 | 21.3505 | 21.089  | 21.0853 | 20.9459 | 21.5038 | 20.9929 | 21.1079 |
| FAM129B  | 21.0919 | 20.9619 | 21.0673 | 20.8921 | 20.8564 | 21.1358 | 21.4842 | 21.0822 | 21.1315 |
| FAM162A  | 20.1915 | 20.262  | 20.1709 | 19.8533 | 19.863  | 19.741  | 19.9905 | 19.9714 | 19.9341 |
| FAM20B   | 17.7777 | 17.3148 | 17.4253 | 17.4674 | 17.2109 | 17.2509 | 17.2615 | 17.2645 | 17.2094 |
| FAM21C   | 17.2887 | 17.1813 | 17.6023 | 17.2874 | 17.3182 | 17.772  | 18.2101 | 17.5973 | 17.2344 |
| FAM3C    | 20.1086 | 20.3077 | 20.2965 | 20.0453 | 20.0844 | 20.1022 | 19.9996 | 19.8624 | 19.8246 |
| FAM49B   | 20.3987 | 20.2788 | 20.3026 | 20.2493 | 20.1528 | 19.9549 | 20.082  | 19.8556 | 19.8689 |
| FAM50A   | 20.1457 | 19.7695 | 20.0401 | 19.9417 | 19.9993 | 20.1822 | 20.3065 | 20.0028 | 19.9011 |
| FAM91A1  | 16.881  | 17.2775 | 17.3144 | 17.1753 | 17.4742 | 17.0404 | 17.7913 | 17.4526 | 17.3602 |
| FAM96B   | 18.2269 | 17.232  | 17.5239 | 17.379  | 17.2556 | 17.4707 | 17.298  | 18.0008 | 18.5273 |
| FAM98A   | 20.4865 | 20.4069 | 20.4531 | 20.5433 | 20.3265 | 20.4684 | 20.311  | 20.4496 | 20.595  |
| FAM98B   | 19.7525 | 19.6694 | 19.7828 | 20.0261 | 19.6942 | 19.6737 | 19.6461 | 19.6648 | 19.9267 |
| FANCD2   | 17.8853 | 17.9937 | 18.0115 | 18.2939 | 17.8321 | 17.0145 | 18.0697 | 18.1347 | 18.242  |
| FANCI    | 19.7248 | 19.7813 | 19.6047 | 19.7511 | 19.555  | 19.5798 | 20.1204 | 19.7167 | 19.8709 |

|         |         |         |         |         |         |         |         |         |         |
|---------|---------|---------|---------|---------|---------|---------|---------|---------|---------|
| FARSA   | 20.7194 | 20.1149 | 20.6774 | 20.7065 | 20.3031 | 20.3574 | 20.8773 | 20.6083 | 20.9832 |
| FARSB   | 22.2178 | 21.6192 | 22.2815 | 22.0976 | 22.215  | 22.3374 | 22.5489 | 22.2817 | 22.3326 |
| FASN    | 24.1591 | 23.6869 | 23.5206 | 23.6271 | 23.4464 | 23.735  | 24.0543 | 23.7444 | 23.688  |
| FASTKD2 | 19.0628 | 18.968  | 18.9289 | 18.5924 | 19.1244 | 18.6593 | 18.9633 | 18.5066 | 18.7602 |
| FAU     | 21.4231 | 21.8309 | 21.6452 | 21.9903 | 21.8251 | 21.9011 | 22.34   | 21.8329 | 21.8517 |
| FBL     | 22.5751 | 22.101  | 22.3659 | 22.3159 | 22.1602 | 22.0948 | 22.5907 | 22.2954 | 22.2708 |
| FBXO22  | 20.487  | 20.5031 | 20.84   | 20.6963 | 20.4585 | 20.5049 | 20.908  | 20.3723 | 20.6494 |
| FBXO7   | 18.5286 | 18.1376 | 18.4171 | 18.2585 | 18.151  | 18.3475 | 18.4896 | 18.3507 | 18.2144 |
| FDPS    | 22.0565 | 21.5287 | 21.8188 | 22.0268 | 21.567  | 22.0476 | 21.9102 | 21.9958 | 22.049  |
| FEN1    | 22.5497 | 22.4955 | 22.5461 | 22.3386 | 22.3888 | 22.5387 | 22.6822 | 22.2993 | 22.3162 |
| FERMT2  | 22.1141 | 22.4378 | 22.3346 | 22.5631 | 22.3955 | 22.4183 | 22.7792 | 22.4223 | 22.5369 |
| FH      | 21.6144 | 21.5627 | 21.601  | 21.9053 | 21.4118 | 21.5296 | 21.3    | 21.4914 | 21.824  |
| FHL2    | 20.2806 | 20.0579 | 20.5078 | 19.9962 | 20.2328 | 20.5839 | 21.0159 | 20.4238 | 20.4889 |
| FHOD1   | 18.5825 | 18.3728 | 18.3058 | 18.3346 | 18.2277 | 18.219  | 18.2305 | 18.1672 | 18.0487 |
| FIP1L1  | 18.8078 | 18.8141 | 18.7668 | 18.9938 | 18.6497 | 19.0466 | 19.1245 | 19.0365 | 19.0843 |
| FIS1    | 18.5601 | 19.0836 | 18.844  | 19.0174 | 19.1056 | 19.4369 | 18.6217 | 18.7914 | 18.218  |
| FKBP10  | 21.0217 | 21.2923 | 21.2082 | 21.1486 | 20.9245 | 20.6269 | 20.6519 | 20.8566 | 21.2738 |
| FKBP11  | 19.7719 | 19.9795 | 19.6863 | 19.7182 | 19.5371 | 20.2523 | 20.2343 | 20.2117 | 20.1777 |
| FKBP1A  | 21.6425 | 21.139  | 21.9685 | 21.8772 | 21.5648 | 22.2647 | 21.8304 | 21.8929 | 22.1853 |
| FKBP2   | 21.7623 | 21.6876 | 21.8003 | 21.8591 | 21.4987 | 21.7542 | 21.8746 | 21.5573 | 21.7487 |
| FKBP3   | 20.7725 | 20.535  | 21.1028 | 20.8445 | 20.6509 | 21.2866 | 21.2893 | 20.8033 | 21.0063 |
| FKBP4   | 22.5028 | 21.5137 | 22.4525 | 22.3231 | 22.0966 | 22.5523 | 23.0176 | 22.3782 | 22.4942 |
| FKBP8   | 18.5319 | 18.2864 | 18.5038 | 18.5247 | 18.0963 | 18.4161 | 18.511  | 18.676  | 18.6334 |
| FKBP9   | 20.1095 | 20.0256 | 20.2099 | 19.9899 | 19.9455 | 20.4134 | 20.568  | 20.2978 | 20.2957 |
| FLAD1   | 17.5497 | 18.0541 | 18.0506 | 18.0121 | 17.9835 | 17.9423 | 18.0492 | 18.0791 | 17.6964 |
| FLII    | 19.4204 | 19.4975 | 19.4807 | 19.6335 | 19.5151 | 19.6102 | 20.3582 | 19.6762 | 19.8023 |
| FLNA    | 24.4388 | 24.216  | 24.2882 | 24.3997 | 24.1331 | 24.3239 | 24.4859 | 24.2289 | 24.4586 |
| FLNB    | 22.1916 | 21.8509 | 21.9079 | 21.8694 | 21.7582 | 22.0412 | 22.3086 | 21.9422 | 21.9292 |
| FLOT1   | 18.2944 | 18.5609 | 18.8794 | 18.711  | 18.7086 | 18.8492 | 18.926  | 18.9899 | 19.14   |
| FLOT2   | 19.6081 | 19.4753 | 19.7063 | 19.3014 | 19.5649 | 19.3058 | 19.6965 | 19.6107 | 19.5894 |
| FLRT3   | 17.3898 | 18.1651 | 18.297  | 18.0427 | 17.9015 | 17.5932 | 18.3574 | 17.8689 | 17.7459 |
| FLT1    | 18.2598 | 18.2051 | 17.9588 | 18.1491 | 17.8261 | 17.5743 | 18.2009 | 17.7751 | 18.0502 |
| FMNL3   | 16.4089 | 16.5668 | 16.6416 | 16.9372 | 16.9377 | 17.7687 | 16.6316 | 17.0319 | 16.2218 |
| FMR1    | 18.4321 | 18.2525 | 18.345  | 18.2593 | 18.3943 | 17.536  | 17.8874 | 18.0703 | 17.9866 |
| FN3KRP  | 19.4465 | 19.3621 | 19.5377 | 19.3182 | 18.9906 | 18.6697 | 19.0664 | 18.6691 | 18.9678 |
| FNBP1L  | 18.8892 | 18.5287 | 18.4583 | 18.587  | 18.0208 | 18.0792 | 18.0212 | 18.4282 | 18.3922 |
| FNDC3B  | 17.373  | 17.8213 | 18.4416 | 17.9024 | 17.618  | 17.4813 | 17.6359 | 17.2858 | 17.6361 |
| FNTA    | 18.6484 | 18.9517 | 18.9624 | 18.7672 | 18.6101 | 18.8998 | 19.0749 | 19.1003 | 19.0289 |
| FOXK1   | 18.7123 | 18.6506 | 18.56   | 18.794  | 18.4772 | 17.9844 | 18.8469 | 18.7531 | 18.5753 |
| FOXRED1 | 17.5537 | 17.7947 | 17.2145 | 17.407  | 17.318  | 16.9364 | 16.9995 | 17.6487 | 17.5249 |
| FOXRED2 | 14.4276 | 15.8647 | 15.4698 | 15.2422 | 15.5937 | 15.2987 | 15.882  | 14.8763 | 15.4742 |
| FRYL    | 16.6268 | 17.0311 | 16.9786 | 17.0249 | 16.8812 | 17.1939 | 16.6    | 16.8059 | 16.2641 |
| FSCN1   | 23.6158 | 23.1932 | 23.3813 | 23.4454 | 23.2979 | 23.1825 | 23.5833 | 23.3495 | 23.4688 |
| FTH1    | 18.2646 | 19.1471 | 18.8443 | 17.2404 | 18.8126 | 19.6398 | 19.8115 | 19.4765 | 19.6342 |
| FTO     | 14.3339 | 15.5128 | 15.2277 | 15.564  | 15.1403 | 15.9316 | 15.146  | 15.7842 | 15.8014 |
| FTSJ1   | 17.335  | 16.8902 | 16.808  | 17.0113 | 16.7044 | 16.7895 | 16.6332 | 16.8723 | 17.2215 |
| FTSJ3   | 20.1394 | 19.8835 | 20.2991 | 20.089  | 20.1642 | 19.7787 | 20.3565 | 20.2434 | 20.0665 |
| FUBP1   | 22.8907 | 22.9526 | 22.8474 | 22.8676 | 22.8001 | 23.2195 | 23.4623 | 22.8449 | 23.2744 |
| FUBP3   | 20.5046 | 20.1756 | 20.2546 | 20.9231 | 20.5583 | 20.3496 | 20.4972 | 20.5263 | 20.527  |
| FUS     | 22.7093 | 22.1312 | 22.9635 | 22.6364 | 22.4903 | 23.041  | 23.4224 | 22.5894 | 22.7642 |
| FXR1    | 22.26   | 21.844  | 21.7516 | 22.0075 | 21.7831 | 21.7598 | 21.9191 | 21.906  | 21.8281 |
| FXR2    | 19.4916 | 19.2528 | 19.0951 | 19.4783 | 19.2641 | 19.4631 | 19.0928 | 19.2354 | 19.4369 |
| G3BP1   | 23.7831 | 23.5376 | 23.6185 | 23.6372 | 23.4631 | 23.6993 | 23.9735 | 23.5848 | 23.7082 |
| G3BP2   | 19.8262 | 19.3553 | 19.4627 | 20.0274 | 19.7275 | 19.9648 | 19.7938 | 19.6459 | 20.1602 |
| G6PD    | 22.9338 | 22.5422 | 22.8667 | 23.067  | 22.7437 | 23.3491 | 23.4277 | 23.1537 | 23.485  |
| GAA     | 16.0707 | 16.8586 | 16.6553 | 16.5402 | 16.993  | 16.0126 | 16.0481 | 16.7939 | 16.5286 |

|            |         |         |         |         |         |         |         |         |         |
|------------|---------|---------|---------|---------|---------|---------|---------|---------|---------|
| GABARAP    | 12.8821 | 14.8679 | 15.7369 | 16.5831 | 16.1955 | 15.3016 | 12.6793 | 15.4555 | 14.6511 |
| GABPA      | 18.4365 | 18.5623 | 18.3545 | 18.364  | 18.4935 | 18.3435 | 18.6608 | 18.4854 | 18.8652 |
| GADD45GIP1 | 16.2111 | 17.36   | 16.7552 | 16.726  | 16.0964 | 16.6298 | 16.438  | 16.7456 | 17.0869 |
| GAK        | 19.2179 | 18.9    | 19.2875 | 19.2548 | 19.3777 | 19.7264 | 20.1422 | 19.8759 | 20.3183 |
| GALE       | 18.4863 | 19.0963 | 18.7817 | 18.9289 | 18.5335 | 18.4908 | 17.8496 | 18.665  | 18.9665 |
| GALK1      | 20.0605 | 19.2535 | 19.6759 | 19.1732 | 19.3869 | 19.7538 | 20.1959 | 19.8342 | 20.013  |
| GALNT2     | 21.7355 | 21.4722 | 21.4442 | 21.3035 | 21.347  | 21.2526 | 21.4319 | 21.3207 | 21.3466 |
| GANAB      | 24.0379 | 24.0571 | 24.1803 | 23.9254 | 23.8107 | 23.801  | 24.1664 | 23.9194 | 24.1103 |
| GAPDH      | 28.9387 | 28.6733 | 28.7987 | 28.6731 | 28.6378 | 29.2063 | 29.2142 | 28.9884 | 28.8799 |
| GAPVD1     | 19.7816 | 18.6332 | 19.858  | 19.927  | 19.8046 | 19.9716 | 20.2959 | 19.678  | 19.9471 |
| GAR1       | 20.5011 | 20.9303 | 20.5064 | 20.6289 | 20.696  | 20.8659 | 20.8028 | 20.725  | 20.674  |
| GARS       | 22.2667 | 21.8124 | 21.9006 | 21.9094 | 21.8505 | 22.0265 | 22.4136 | 22.0797 | 22.0592 |
| GART       | 22.0799 | 21.3025 | 22.2411 | 21.9275 | 21.9455 | 22.0445 | 22.61   | 22.0451 | 22.1278 |
| GATAD2B    | 20.2244 | 19.1064 | 19.89   | 20.0568 | 19.8988 | 20.1167 | 20.4159 | 19.8409 | 19.9501 |
| GBA        | 20.7647 | 20.0382 | 20.143  | 20.1615 | 19.7559 | 19.9759 | 19.7379 | 20.0353 | 20.3732 |
| GBAS       | 19.9333 | 18.9345 | 19.6993 | 19.9258 | 19.7828 | 19.8017 | 20.0117 | 19.9052 | 20.0675 |
| GBE1       | 19.7747 | 19.6953 | 19.5533 | 19.4502 | 19.4644 | 19.7362 | 19.7647 | 19.6215 | 19.6849 |
| GBF1       | 18.0311 | 18.069  | 17.8195 | 17.8644 | 17.736  | 17.7198 | 18.3609 | 18.1428 | 18.4311 |
| GCDH       | 17.6915 | 18.2478 | 18.0973 | 18.3933 | 17.881  | 17.9646 | 17.431  | 18.1453 | 17.9199 |
| GCLC       | 19.1186 | 18.927  | 18.5511 | 18.8055 | 18.4119 | 18.5723 | 18.6813 | 18.8071 | 18.9345 |
| GCLM       | 21.2132 | 20.3849 | 21.2147 | 21.3748 | 21.1572 | 21.1385 | 21.5276 | 21.0725 | 21.1044 |
| GCN1L1     | 21.2809 | 20.902  | 20.827  | 20.7624 | 20.8145 | 20.5528 | 20.932  | 20.6485 | 20.7089 |
| GDI1       | 21.1016 | 21.1852 | 21.1747 | 21.122  | 20.8653 | 21.2878 | 21.2521 | 21.3568 | 21.6401 |
| GDI2       | 23.045  | 22.7233 | 22.5515 | 22.5381 | 22.5248 | 22.8333 | 22.7716 | 22.6011 | 22.6916 |
| GEMIN4     | 18.8706 | 20.1196 | 19.1145 | 18.9511 | 19.5089 | 18.9538 | 19.9114 | 19.2364 | 18.8386 |
| GEMIN5     | 19.0018 | 18.9206 | 18.9606 | 18.8202 | 18.7441 | 18.3711 | 18.9986 | 19.0217 | 18.972  |
| GFM1       | 20.5643 | 20.4104 | 20.2631 | 20.3423 | 20.0642 | 19.8996 | 20.1005 | 19.9832 | 20.2405 |
| GFM2       | 17.1975 | 16.8801 | 17.1744 | 17.1199 | 16.9153 | 16.7034 | 17.4232 | 17.0423 | 17.0458 |
| GFPT1      | 21.4211 | 21.3441 | 21.5037 | 21.2772 | 21.418  | 21.5806 | 21.9664 | 21.6064 | 21.7601 |
| GGCT       | 21.014  | 20.8259 | 21.0824 | 20.9425 | 20.8768 | 20.7307 | 20.7829 | 20.4945 | 20.4137 |
| GGH        | 21.3297 | 21.4026 | 21.4983 | 21.2927 | 21.3938 | 21.4759 | 21.6691 | 21.3979 | 21.5558 |
| GGT7       | 14.3423 | 16.4396 | 16.6962 | 16.7089 | 16.8982 | 17.5331 | 16.7645 | 16.967  | 17.0279 |
| GIGYF2     | 20.2857 | 19.9292 | 20.3362 | 20.1165 | 19.9981 | 20.3283 | 20.6472 | 20.0934 | 20.4073 |
| GINS3      | 17.1264 | 17.526  | 17.2654 | 17.2624 | 16.9834 | 18.3543 | 18.1847 | 17.7626 | 17.781  |
| GINS4      | 19.8628 | 19.6458 | 19.6038 | 19.375  | 19.5615 | 19.8843 | 20.0888 | 19.6611 | 19.5321 |
| GIPC1      | 20.4724 | 20.2619 | 20.3117 | 20.3668 | 20.1169 | 20.1512 | 20.3716 | 20.1476 | 20.4148 |
| GIT1       | 17.9145 | 17.1812 | 17.2849 | 16.7384 | 16.9117 | 16.9946 | 17.2769 | 17.2506 | 16.5096 |
| GIT2       | 14.3208 | 15.3918 | 16.0598 | 16.6165 | 15.6908 | 15.3094 | 13.8955 | 15.5275 | 14.7506 |
| GLA        | 19.3957 | 18.5515 | 18.8358 | 18.8822 | 18.0891 | 18.6434 | 18.4897 | 18.7479 | 18.9293 |
| GLB1       | 19.6913 | 19.238  | 19.2765 | 18.9467 | 19.0819 | 19.2923 | 19.6229 | 19.1832 | 19.0072 |
| GLG1       | 20.2608 | 20.1341 | 20.3087 | 20.0527 | 19.9953 | 19.5487 | 20.0351 | 19.6503 | 19.7096 |
| GLO1       | 22.5172 | 22.4422 | 22.6192 | 22.395  | 22.3539 | 22.685  | 22.8062 | 22.6019 | 22.6868 |
| GLOD4      | 20.6867 | 20.3572 | 20.9217 | 20.7121 | 20.4187 | 20.9615 | 21.3109 | 20.885  | 20.9657 |
| GLRX3      | 21.5123 | 21.2245 | 21.2061 | 21.2275 | 21.2741 | 21.4628 | 21.5005 | 21.4619 | 21.335  |
| GLS        | 21.1868 | 20.8292 | 20.9987 | 20.8706 | 20.7532 | 20.9063 | 21.567  | 21.0004 | 21.0208 |
| GLUD1      | 21.5769 | 21.0368 | 21.326  | 21.1623 | 20.8816 | 20.6769 | 21.1133 | 21.0046 | 21.073  |
| GLYR1      | 18.2597 | 18.2283 | 18.4683 | 18.078  | 18.148  | 18.2401 | 18.2606 | 18.1958 | 18.1283 |
| GMDS       | 18.7525 | 18.4485 | 18.2665 | 18.4629 | 18.1785 | 18.2927 | 18.4387 | 18.377  | 18.7349 |
| GMPPA      | 19.4588 | 19.2648 | 19.4964 | 19.2569 | 19.3004 | 19.2915 | 19.4795 | 19.3313 | 19.1025 |
| GMPPB      | 20.3285 | 19.7583 | 20.3354 | 20.3874 | 20.3379 | 20.4183 | 20.5493 | 20.3048 | 20.4852 |
| GMPR2      | 17.5755 | 17.671  | 17.6241 | 17.3983 | 17.4139 | 17.5987 | 17.9131 | 17.6665 | 17.5824 |
| GMPS       | 21.5173 | 21.5775 | 21.5974 | 21.7383 | 21.5538 | 20.7738 | 21.7238 | 21.5854 | 21.7556 |
| GNA11      | 19.1471 | 18.1183 | 19.0289 | 18.8838 | 18.9587 | 19.239  | 19.4244 | 19.2608 | 19.4257 |
| GNA13      | 17.9097 | 17.4604 | 17.5072 | 17.4945 | 17.2956 | 16.3102 | 16.3283 | 17.5753 | 17.7947 |
| GNAI2      | 22.0116 | 21.8499 | 21.7482 | 21.9427 | 21.558  | 21.9859 | 22.0335 | 22.0427 | 22.2901 |
| GNAI3      | 19.9867 | 19.6641 | 19.358  | 19.7052 | 19.2615 | 19.0154 | 19.2022 | 19.2975 | 19.3435 |

|         |         |         |         |         |         |         |         |         |         |
|---------|---------|---------|---------|---------|---------|---------|---------|---------|---------|
| GNAQ    | 18.3277 | 18.291  | 18.2379 | 18.574  | 17.9875 | 17.4564 | 17.4724 | 17.969  | 18.0003 |
| GNAS    | 20.6799 | 21.2396 | 21.2159 | 20.9897 | 20.961  | 21.2577 | 21.5555 | 21.2162 | 21.3822 |
| GNB1    | 20.895  | 19.4058 | 20.7607 | 20.7939 | 20.6246 | 20.7601 | 20.8707 | 20.5785 | 20.8672 |
| GNB2    | 21.1776 | 20.4169 | 21.0119 | 20.5893 | 20.9936 | 21.4893 | 21.5396 | 21.2507 | 21.3576 |
| GNB2L1  | 25.3593 | 25.0429 | 25.2289 | 25.0789 | 25.1745 | 25.2852 | 25.4008 | 25.1343 | 25.2347 |
| GNE     | 19.1184 | 18.8455 | 18.8652 | 18.482  | 18.6742 | 18.5113 | 18.8704 | 18.9963 | 18.6809 |
| GNL1    | 19.0955 | 18.5386 | 18.7046 | 18.7454 | 18.4771 | 18.8823 | 19.1872 | 18.7509 | 18.7218 |
| GNL2    | 18.7745 | 18.7688 | 18.745  | 18.9037 | 18.5171 | 18.2179 | 18.6327 | 19.0393 | 18.8432 |
| GNL3    | 21.2797 | 21.2843 | 21.3405 | 21.0709 | 21.0233 | 21.0218 | 21.4926 | 21.2081 | 21.2065 |
| GNPDA1  | 20.8389 | 21.5124 | 21.1134 | 21.3106 | 21.1926 | 21.373  | 21.4012 | 20.8198 | 21.2402 |
| GNPNAT1 | 19.0037 | 18.4975 | 18.5825 | 18.6524 | 18.735  | 18.7374 | 18.6537 | 18.7631 | 18.6235 |
| GNS     | 18.6222 | 18.5788 | 18.2459 | 18.2402 | 18.181  | 18.4068 | 18.1063 | 18.4252 | 18.9505 |
| GOLGA2  | 17.5862 | 17.8164 | 17.7587 | 17.7068 | 17.6625 | 17.9809 | 18.0239 | 17.9923 | 17.8257 |
| GOLGA3  | 17.4017 | 17.565  | 17.6959 | 17.9208 | 18.0531 | 17.4725 | 17.5654 | 17.4061 | 18.0293 |
| GOLGA4  | 17.235  | 17.1388 | 17.3549 | 17.0988 | 17.0132 | 16.9092 | 17.3031 | 17.4714 | 17.5816 |
| GOLGB1  | 13.6447 | 17.0887 | 17.2887 | 16.6254 | 16.9726 | 16.8326 | 17.2378 | 16.6781 | 16.6727 |
| GOLPH3  | 18.2079 | 17.9641 | 17.9682 | 17.9703 | 17.8834 | 17.7837 | 18.2243 | 17.8403 | 18.1193 |
| GOLT1B  | 19.1696 | 19.0041 | 19.0464 | 18.8431 | 19.1063 | 18.8792 | 18.684  | 18.6805 | 18.2604 |
| GORASP2 | 19.6913 | 18.8501 | 19.4324 | 19.5141 | 19.3863 | 19.5474 | 19.5252 | 19.4347 | 19.5067 |
| GOT1    | 21.1615 | 20.5903 | 21.1314 | 21.1985 | 20.8452 | 20.9919 | 21.3784 | 21.1753 | 21.3579 |
| GOT2    | 23.2251 | 22.7215 | 23.0744 | 23.0284 | 22.9244 | 23.1536 | 23.3792 | 23.0615 | 23.288  |
| GPATCH4 | 18.9064 | 18.3214 | 18.435  | 18.3624 | 18.233  | 18.5464 | 18.603  | 18.7347 | 18.4181 |
| GPC1    | 19.9305 | 22.0696 | 19.7974 | 19.7089 | 19.5507 | 20.045  | 20.4163 | 19.8152 | 20.1407 |
| GPD1L   | 17.8948 | 19.0386 | 16.8745 | 16.6567 | 16.8982 | 16.4628 | 16.4944 | 16.7839 | 16.5615 |
| GPD2    | 20.9508 | 21.1809 | 21.36   | 20.9895 | 21.2647 | 20.999  | 21.2938 | 21.0359 | 21.0556 |
| GPHN    | 18.3908 | 17.7389 | 18.1295 | 18.2731 | 18.1717 | 18.7063 | 19.0969 | 18.3717 | 18.6425 |
| GPI     | 23.218  | 23.0459 | 23.7098 | 23.7518 | 23.6424 | 24.1182 | 24.3622 | 23.932  | 24.1455 |
| GPKOW   | 18.3691 | 18.2724 | 18.2128 | 18.3844 | 17.6299 | 17.9215 | 18.0534 | 18.0236 | 18.3733 |
| GPN1    | 18.9945 | 18.7971 | 19.0218 | 18.9786 | 18.8685 | 19.3315 | 19.1156 | 18.9059 | 18.7897 |
| GPRC5A  | 21.0746 | 20.9422 | 20.7712 | 21.0596 | 20.6972 | 20.8571 | 20.8951 | 21.0083 | 21.5176 |
| GPS1    | 20.8601 | 20.932  | 21.3084 | 20.9707 | 20.9649 | 20.678  | 21.2864 | 21.0003 | 21.1307 |
| GRB2    | 20.1362 | 20.0846 | 20.4406 | 20.2298 | 20.0719 | 20.05   | 20.6733 | 20.1251 | 20.4244 |
| GRHPR   | 19.3456 | 18.8986 | 19.2619 | 18.9407 | 18.9254 | 19.1461 | 19.7092 | 19.3976 | 19.4424 |
| GRIPAP1 | 17.045  | 17.944  | 16.2316 | 16.2184 | 16.8086 | 16.613  | 16.861  | 16.6578 | 16.9377 |
| GRPEL1  | 19.2225 | 19.0053 | 18.8314 | 19.005  | 19.0595 | 17.9803 | 19.3581 | 18.967  | 19.2063 |
| GRSF1   | 20.7738 | 20.8654 | 20.5673 | 20.7574 | 20.6631 | 19.8638 | 20.7074 | 20.4972 | 20.6757 |
| GRWD1   | 21.3064 | 21.0098 | 21.1598 | 20.781  | 20.7654 | 21.0756 | 21.4188 | 21.0633 | 21.0015 |
| GSK3B   | 18.5917 | 18.7542 | 18.4026 | 18.891  | 18.7103 | 18.6544 | 19.0598 | 18.525  | 18.6563 |
| GSN     | 21.5522 | 20.8462 | 21.371  | 21.3484 | 21.385  | 21.9649 | 21.8274 | 21.8605 | 21.7456 |
| GSPT1   | 21.5566 | 21.6466 | 21.5152 | 21.4967 | 21.3886 | 21.419  | 21.4265 | 21.3842 | 21.6588 |
| GSR     | 21.9196 | 21.3792 | 21.7184 | 21.7377 | 21.592  | 21.9641 | 22.3043 | 22.0436 | 22.0205 |
| GSS     | 21.8165 | 21.3048 | 21.5515 | 21.2226 | 21.4772 | 21.8071 | 22.251  | 21.5943 | 21.5684 |
| GSTK1   | 20.1523 | 19.9098 | 19.9076 | 19.8095 | 19.6897 | 20.1699 | 20.0688 | 20.107  | 20.3775 |
| GSTM3   | 20.7911 | 21.6442 | 20.6637 | 20.3894 | 20.3295 | 20.5307 | 20.6754 | 20.3595 | 20.4906 |
| GSTO1   | 21.2976 | 20.7395 | 21.2859 | 21.4878 | 21.2533 | 21.7216 | 21.8199 | 21.4635 | 21.6794 |
| GSTP1   | 25.2845 | 24.7271 | 25.0259 | 25.0859 | 24.8534 | 25.4325 | 25.7728 | 25.2703 | 25.2824 |
| GSTT2   | 19.5181 | 19.6192 | 20.008  | 19.1892 | 19.4542 | 19.0648 | 19.8823 | 19.5857 | 19.6129 |
| GTF2B   | 18.6686 | 17.4032 | 18.1549 | 18.1089 | 18.3448 | 18.4469 | 18.8942 | 18.1076 | 18.2029 |
| GTF2F1  | 19.5488 | 19.2555 | 19.4161 | 19.3576 | 19.2097 | 19.3077 | 19.2526 | 19.2223 | 19.3388 |
| GTF2F2  | 19.4207 | 19.7932 | 19.4964 | 19.6715 | 19.2599 | 19.3236 | 19.1219 | 19.4573 | 19.6737 |
| GTF2H1  | 16.8876 | 16.9233 | 16.6574 | 16.7023 | 16.8132 | 17.2636 | 16.4146 | 16.5774 | 16.6765 |
| GTF2H2  | 17.9597 | 17.7946 | 17.8808 | 17.4477 | 17.6859 | 17.6611 | 18.1097 | 17.6714 | 17.8895 |
| GTF2I   | 21.0166 | 20.9738 | 20.8584 | 20.7638 | 20.933  | 20.8105 | 21.5533 | 21.0211 | 21.1938 |
| GTF3C1  | 18.2656 | 18.2908 | 18.3376 | 18.1505 | 18.0955 | 18.1947 | 17.8274 | 18.1699 | 18.0872 |
| GTF3C2  | 17.5438 | 18.5767 | 19.1651 | 19.0753 | 18.98   | 18.9508 | 19.3757 | 19.1517 | 19.0434 |
| GTF3C3  | 18.1051 | 18.1377 | 18.3347 | 17.8624 | 17.8794 | 17.5865 | 18.1063 | 17.9618 | 18.2048 |

|           |         |         |         |         |         |         |         |         |         |
|-----------|---------|---------|---------|---------|---------|---------|---------|---------|---------|
| GTF3C4    | 19.172  | 18.8129 | 19.2032 | 19.271  | 19.2179 | 19.2253 | 19.3608 | 19.054  | 19.1386 |
| GTF3C5    | 18.3523 | 18.6561 | 18.5717 | 18.8896 | 18.7427 | 18.9002 | 18.7779 | 18.625  | 18.2106 |
| GTPBP10   | 16.8909 | 17.0597 | 16.7869 | 16.0696 | 16.7297 | 16.9864 | 17.0365 | 16.833  | 16.7735 |
| GTPBP4    | 19.471  | 19.4643 | 19.4335 | 19.429  | 19.2406 | 18.9569 | 19.457  | 19.4376 | 19.4545 |
| H1FX      | 19.7359 | 19.6559 | 19.58   | 19.8773 | 19.2788 | 19.7257 | 20.0551 | 19.6615 | 19.739  |
| H2AFY     | 22.799  | 22.7236 | 22.6004 | 22.4367 | 22.4473 | 22.7545 | 22.8674 | 22.365  | 22.4198 |
| H2AFZ     | 23.0733 | 22.9454 | 22.9181 | 22.957  | 22.9274 | 23.0777 | 22.8462 | 22.8553 | 23.1371 |
| H3F3A     | 20.9243 | 20.8093 | 21.1084 | 19.5487 | 21.4191 | 22.1678 | 19.1276 | 21.0793 | 20.8772 |
| HACL1     | 19.7196 | 19.6451 | 19.7372 | 19.3997 | 19.3158 | 19.4598 | 19.8033 | 19.4817 | 19.7312 |
| HADH      | 20.1055 | 20.188  | 20.3017 | 19.8107 | 20.3027 | 19.8168 | 19.8699 | 20.0736 | 20.041  |
| HADHA     | 21.9915 | 22.3991 | 22.2963 | 22.3267 | 22.2617 | 22.4405 | 22.9028 | 22.2678 | 22.6301 |
| HADHB     | 22.8736 | 22.9439 | 22.7602 | 22.8039 | 22.6632 | 22.7367 | 22.9295 | 22.6876 | 22.9463 |
| HARS      | 22.7331 | 22.6972 | 22.7932 | 22.5157 | 22.552  | 22.5172 | 22.9502 | 22.4867 | 22.6756 |
| HAT1      | 20.6818 | 20.7101 | 20.6998 | 20.6513 | 20.429  | 20.0509 | 19.8922 | 19.7543 | 20.0768 |
| HAX1      | 18.9989 | 18.6718 | 18.6785 | 18.7706 | 18.5671 | 18.7243 | 19.0656 | 18.6914 | 18.8798 |
| HBA1      | 19.8003 | 19.5261 | 19.8803 | 20.2526 | 19.7625 | 19.8603 | 20.1837 | 19.5457 | 20.0483 |
| HBS1L     | 18.215  | 18.4396 | 18.4683 | 18.6685 | 18.4233 | 18.1767 | 18.3221 | 18.2029 | 17.8968 |
| HCCS      | 18.0887 | 18.1136 | 18.0137 | 17.9659 | 18      | 17.9643 | 18.016  | 18.0507 | 18.2598 |
| HCFC1     | 21.2887 | 21.1921 | 21.7033 | 21.2704 | 21.1471 | 21.6902 | 21.8284 | 21.2536 | 21.8575 |
| HDAC1     | 21.3622 | 20.8998 | 21.0418 | 21.0075 | 20.7443 | 21.2209 | 21.0493 | 21.1246 | 21.3632 |
| HDAC2     | 21.8767 | 21.4603 | 21.6324 | 21.4737 | 21.1827 | 21.2107 | 21.162  | 21.3986 | 21.587  |
| HDGF      | 23.4217 | 23.2866 | 23.2478 | 23.4736 | 23.2617 | 23.1308 | 23.1877 | 22.9717 | 23.4524 |
| HDGFRP2   | 19.2108 | 18.2114 | 19.2787 | 19.1348 | 19.2079 | 19.3341 | 19.3782 | 19.292  | 19.5525 |
| HDHD2     | 18.0989 | 17.7651 | 17.7645 | 17.6791 | 17.9574 | 17.3132 | 17.8435 | 17.5685 | 17.3864 |
| HDLBP     | 22.3188 | 21.8477 | 22.123  | 22.2437 | 22.2545 | 22.6374 | 23.3363 | 22.403  | 22.4822 |
| HEATR1    | 20.0833 | 20.1796 | 20.1946 | 19.7564 | 19.869  | 19.7117 | 20.5884 | 20.1222 | 20.3866 |
| HEATR2    | 18.6698 | 18.9002 | 19.3191 | 18.7488 | 18.8019 | 19.1622 | 19.5035 | 18.8896 | 18.9636 |
| HECTD1    | 16.9841 | 16.7543 | 16.6131 | 16.9692 | 16.7107 | 16.3276 | 17.1586 | 17.075  | 16.9572 |
| HELLS     | 17.381  | 17.6456 | 17.6875 | 17.4637 | 17.3521 | 16.7268 | 16.6433 | 17.0755 | 17.2345 |
| HEXA      | 20.4068 | 20.1603 | 20.2431 | 20.2988 | 20.2514 | 20.0225 | 20.205  | 20.4104 | 20.6053 |
| HEXB      | 21.3617 | 21.1751 | 21.0203 | 21.1028 | 21.0176 | 20.6724 | 21.1336 | 21.096  | 21.2598 |
| HEXIM1    | 19.1311 | 18.1307 | 18.3955 | 18.9915 | 18.2563 | 18.0467 | 17.5586 | 18.3188 | 18.7922 |
| HGS       | 20.3441 | 19.6552 | 20.4742 | 20.5926 | 20.1213 | 20.1947 | 20.5112 | 20.2342 | 20.5133 |
| HIBADH    | 19.4438 | 19.3325 | 18.8182 | 19.2814 | 18.8637 | 19.0037 | 18.4184 | 19.2017 | 19.281  |
| HIBCH     | 19.0258 | 18.9851 | 18.8565 | 18.99   | 18.7872 | 18.4853 | 18.9744 | 18.7052 | 18.6685 |
| HINT1     | 19.2932 | 16.8099 | 19.1642 | 19.1024 | 18.9195 | 20.369  | 21.307  | 19.9789 | 19.9902 |
| HINT2     | 19.6951 | 19.8136 | 19.681  | 19.7618 | 19.8413 | 20.2311 | 20.5319 | 19.7483 | 20.1446 |
| HIP1      | 17.6317 | 18.041  | 17.9141 | 18.3771 | 17.8586 | 17.8866 | 17.9262 | 17.7356 | 18.0636 |
| HIST1H1C  | 21.7111 | 22.1572 | 22.2318 | 22.4638 | 22.0054 | 22.2967 | 22.2873 | 21.8424 | 22.1595 |
| HIST1H2AA | 21.3402 | 21.313  | 21.1929 | 21.2967 | 21.233  | 15.6859 | 20.5577 | 21.7302 | 21.02   |
| HIST1H2AB | 17.9602 | 15.9737 | 17.8391 | 16.9879 | 17.7839 | 20.4272 | 22.883  | 17.7156 | 17.672  |
| HIST1H2AH | 20.1218 | 19.4486 | 20.8951 | 19.3459 | 20.2295 | 22.7277 | 24.9226 | 20.7915 | 19.7025 |
| HIST1H2BJ | 24.7906 | 24.9053 | 24.9069 | 24.857  | 24.8684 | 24.7517 | 25.2561 | 24.8603 | 25.0527 |
| HIST1H2BK | 25.9767 | 22.6121 | 25.8051 | 26.0683 | 25.9646 | 26.127  | 26.4615 | 26.0601 | 26.1873 |
| HIST1H3A  | 22.8917 | 22.8324 | 23.1118 | 24.2386 | 23.3681 | 22.4312 | 21.7341 | 23.0618 | 23.2664 |
| HIST1H4A  | 28.0553 | 28.4033 | 28.2635 | 28.083  | 27.9718 | 28.1784 | 28.501  | 28.2109 | 28.3125 |
| HIST2H3A  | 19.5733 | 21.9477 | 22.4389 | 23.5623 | 22.8845 | 18.8509 | 20.1023 | 22.6384 | 22.3299 |
| HJURP     | 15.4243 | 14.3694 | 15.8746 | 15.8964 | 15.5289 | 15.8222 | 16.5504 | 16.3988 | 16.9311 |
| HK1       | 21.4071 | 21.5445 | 21.4907 | 21.3903 | 21.3359 | 21.3342 | 21.6827 | 21.3168 | 21.4849 |
| HK2       | 20.8952 | 21.4055 | 20.8378 | 20.7463 | 20.7592 | 20.9878 | 21.0595 | 20.7874 | 20.9285 |
| HLA-A     | 23.1939 | 23.0908 | 23.1441 | 23.0174 | 22.7263 | 23.1602 | 23.3746 | 23.1213 | 23.3792 |
| HLA-B     | 18.3932 | 17.7029 | 18.1267 | 17.9576 | 18.1915 | 18.5414 | 18.5762 | 18.0389 | 17.9935 |
| HLA-DPA1  | 22.3187 | 22.0877 | 22.0553 | 22.2118 | 21.8892 | 21.8495 | 21.9504 | 22.1164 | 21.8967 |
| HLA-DRA   | 24.1286 | 23.5072 | 23.5838 | 23.3764 | 23.6431 | 23.6554 | 23.5999 | 23.6724 | 23.3255 |
| HLA-DRB1  | 24.0469 | 24.3971 | 23.8156 | 23.8645 | 23.6819 | 23.8453 | 23.9955 | 23.7091 | 24.008  |
| HM13      | 23.3501 | 23.3366 | 23.3977 | 23.1931 | 23.1597 | 23.0396 | 23.4017 | 23.1994 | 23.3882 |

|           |         |         |         |         |         |         |         |         |         |
|-----------|---------|---------|---------|---------|---------|---------|---------|---------|---------|
| HMBS      | 18.1105 | 17.7924 | 17.5571 | 18.0753 | 17.5542 | 17.0814 | 17.2357 | 17.692  | 17.7456 |
| HMGA1     | 22.0166 | 21.2643 | 21.6552 | 22.3547 | 21.8675 | 22.2474 | 22.1631 | 22.0294 | 22.4695 |
| HMGB1     | 22.9381 | 19.139  | 22.4743 | 22.9691 | 22.7184 | 23.0284 | 22.8138 | 22.4741 | 22.7829 |
| HMGB2     | 19.8991 | 17.9715 | 19.5495 | 19.9737 | 19.508  | 19.9317 | 19.227  | 19.4496 | 19.8887 |
| HMGB3     | 20.475  | 20.6401 | 20.7516 | 20.4964 | 20.4923 | 20.5967 | 20.2032 | 20.3592 | 20.3403 |
| HMOX2     | 18.0267 | 17.6442 | 17.8481 | 17.8121 | 17.4649 | 17.9674 | 17.0251 | 17.6969 | 17.203  |
| HNRNPA0   | 24.2495 | 24.0109 | 23.9089 | 23.95   | 23.8914 | 24.1428 | 24.1401 | 24.0821 | 24.1467 |
| HNRNPA1   | 26.2739 | 25.5899 | 25.9831 | 26.1341 | 25.9263 | 25.9389 | 25.564  | 25.9853 | 26.1915 |
| HNRNPA2B1 | 26.647  | 26.0418 | 26.1193 | 26.456  | 26.0706 | 26.2204 | 25.9826 | 26.2789 | 26.4405 |
| HNRNPA3   | 24.9084 | 24.6456 | 24.737  | 24.6915 | 24.5196 | 24.429  | 24.3918 | 24.6487 | 24.7714 |
| HNRNPAB   | 22.1927 | 21.9334 | 21.8028 | 21.9743 | 21.9626 | 22.1627 | 22.4327 | 22.1695 | 22.16   |
| HNRNPC    | 25.0742 | 24.4509 | 25.1452 | 25.0104 | 24.997  | 25.1183 | 25.3867 | 24.9963 | 25.0711 |
| HNRNPD    | 24.0605 | 23.982  | 23.9563 | 24.017  | 23.9093 | 24.2072 | 24.5585 | 24.1381 | 24.1168 |
| HNRNPF    | 23.1584 | 22.3838 | 23.1114 | 23.3492 | 23.1648 | 23.5522 | 23.62   | 23.2318 | 23.5784 |
| HNRNPH1   | 24.7757 | 24.3838 | 24.5944 | 24.4141 | 24.2812 | 24.5026 | 24.5667 | 24.5556 | 24.7046 |
| HNRNPH2   | 21.0343 | 20.657  | 20.8135 | 20.7012 | 20.497  | 20.6699 | 20.6308 | 20.8716 | 21.0127 |
| HNRNPH3   | 23.188  | 23.1048 | 23.1577 | 22.9696 | 23.0076 | 23.1327 | 23.4026 | 23.1583 | 23.1834 |
| HNRNPK    | 25.5245 | 25.4595 | 25.395  | 25.2935 | 25.2797 | 25.5614 | 25.8372 | 25.4228 | 25.5467 |
| HNRNPL    | 24.085  | 24.0675 | 23.9432 | 23.7868 | 23.6956 | 23.8611 | 24.2382 | 24.008  | 24.2261 |
| HNRNPM    | 24.5029 | 24.2217 | 24.2852 | 24.2088 | 24.0375 | 24.3688 | 24.7913 | 24.4129 | 24.4706 |
| HNRNPR    | 23.1567 | 22.6521 | 23.0286 | 22.9206 | 22.8763 | 22.9179 | 22.959  | 22.9017 | 22.9136 |
| HNRNPU    | 25.1392 | 24.8114 | 24.6951 | 24.7631 | 24.7896 | 24.2894 | 24.8067 | 24.9096 | 24.8693 |
| HNRNPUL1  | 21.789  | 21.7935 | 21.7854 | 21.8291 | 21.5164 | 21.4359 | 21.6024 | 21.3392 | 21.5043 |
| HNRNPUL2  | 22.9131 | 22.8035 | 22.7101 | 22.7564 | 22.5255 | 22.4722 | 22.6911 | 22.6309 | 22.8413 |
| HNRPDL    | 23.2446 | 23.2505 | 23.1971 | 23.2612 | 23.1773 | 23.3791 | 23.5862 | 23.2932 | 23.4025 |
| HNRPLL    | 19.2258 | 18.9488 | 19.1284 | 18.9032 | 18.9231 | 18.9405 | 19.2193 | 19.219  | 18.8133 |
| HOOK3     | 19.254  | 19.2062 | 19.7158 | 19.4009 | 18.8985 | 19.2856 | 19.6247 | 19.1856 | 19.4794 |
| HPCAL1    | 21.7781 | 21.7299 | 21.6414 | 21.7586 | 21.633  | 21.9732 | 22.224  | 21.8707 | 22.2151 |
| HPRT1     | 20.5886 | 20.5002 | 20.4675 | 20.5641 | 20.3536 | 20.4518 | 20.5723 | 20.6181 | 20.4562 |
| HRNR      | 18.9832 | 13.768  | 13.3354 | 12.5507 | 14.3061 | 13.2271 | 13.2117 | 14.1899 | 13.9549 |
| HSD17B10  | 22.0697 | 21.9609 | 21.9915 | 21.7829 | 21.8171 | 22.8185 | 23.031  | 22.7904 | 22.8147 |
| HSD17B11  | 18.9409 | 18.761  | 18.8217 | 18.5108 | 18.6025 | 19.1219 | 18.8604 | 18.9493 | 19.1178 |
| HSD17B12  | 18.6415 | 18.4619 | 18.3692 | 17.9727 | 18.3983 | 17.3187 | 18.2169 | 18.286  | 17.8372 |
| HSD17B4   | 21.8797 | 21.5034 | 21.8067 | 21.7343 | 21.5522 | 21.6682 | 21.9987 | 21.7277 | 21.7027 |
| HSDL1     | 18.4643 | 18.2097 | 18.3902 | 17.85   | 17.9831 | 17.5728 | 18.0314 | 17.8604 | 17.665  |
| HSDL2     | 18.5653 | 18.4652 | 18.5453 | 18.5932 | 18.3755 | 18.6152 | 18.9164 | 18.8039 | 18.7939 |
| HSP90AA1  | 26.2837 | 25.6702 | 26.0786 | 26.0939 | 25.9864 | 26.246  | 26.5057 | 26.2088 | 26.3853 |
| HSP90AA4P | 17.8851 | 18.038  | 17.2681 | 19.0025 | 17.327  | 17.6148 | 14.843  | 17.3425 | 18.1317 |
| HSP90AB1  | 26.8557 | 26.6206 | 26.7542 | 26.6406 | 26.5085 | 26.6525 | 27.0126 | 26.5932 | 26.7941 |
| HSP90B1   | 25.9629 | 25.6296 | 25.6646 | 25.6388 | 25.6468 | 25.6181 | 25.9914 | 25.638  | 25.717  |
| HSPA13    | 18.8601 | 18.3374 | 18.3487 | 18.5236 | 18.1192 | 18.6534 | 18.7962 | 18.7791 | 18.8471 |
| HSPA14    | 17.3315 | 18.1046 | 18.2466 | 18.0699 | 17.7611 | 16.8404 | 16.6384 | 17.0261 | 16.728  |
| HSPA1A    | 24.4781 | 24.3918 | 24.5494 | 24.3341 | 24.2821 | 24.5457 | 24.7618 | 24.41   | 24.4725 |
| HSPA4     | 23.5846 | 23.5512 | 23.5946 | 23.4532 | 23.261  | 23.2134 | 23.6818 | 23.4683 | 23.4934 |
| HSPA4L    | 20.5377 | 20.7378 | 20.6317 | 20.4632 | 20.5123 | 20.3483 | 20.7666 | 20.4266 | 20.6845 |
| HSPA5     | 25.7387 | 25.4902 | 25.7786 | 25.4966 | 25.5156 | 25.6179 | 26.1837 | 25.6536 | 25.8306 |
| HSPA8     | 26.6909 | 25.6166 | 26.6275 | 26.4643 | 26.3224 | 26.6028 | 26.8731 | 26.5759 | 26.7228 |
| HSPA9     | 24.5381 | 24.2346 | 24.2906 | 24.217  | 24.1005 | 24.5586 | 24.7579 | 24.2433 | 24.4458 |
| HSPB1     | 24.9227 | 24.7854 | 24.7724 | 24.5891 | 24.6297 | 24.8452 | 25.0956 | 25.0014 | 24.9409 |
| HSPB11    | 20.9384 | 20.6512 | 20.5102 | 20.8574 | 20.3672 | 20.6185 | 20.3695 | 20.6146 | 20.5697 |
| HSPBP1    | 20.5438 | 20.257  | 20.2829 | 19.9715 | 20.099  | 20.2075 | 20.3753 | 20.2093 | 20.034  |
| HSPD1     | 25.8018 | 25.3173 | 25.375  | 25.2474 | 25.2671 | 25.8111 | 26.0203 | 25.4774 | 25.508  |
| HSPE1     | 23.9286 | 24.0984 | 23.8888 | 24.142  | 24.0395 | 24.3032 | 24.6364 | 24.1435 | 24.4767 |
| HSPH1     | 23.0016 | 22.6403 | 22.5851 | 22.632  | 22.3759 | 22.2882 | 22.5945 | 22.5258 | 22.5091 |
| HTATSF1   | 18.9682 | 19.0698 | 18.6631 | 18.9441 | 18.6202 | 18.1294 | 18.3869 | 18.4539 | 18.4121 |
| HUWE1     | 18.755  | 18.7466 | 18.4766 | 18.5135 | 18.3561 | 18.7483 | 19.0122 | 18.9198 | 19.1537 |

|         |         |         |         |         |         |         |         |         |         |
|---------|---------|---------|---------|---------|---------|---------|---------|---------|---------|
| HYI     | 16.9777 | 17.3473 | 16.9561 | 16.9163 | 15.3878 | 16.1563 | 15.4784 | 16.8286 | 17.0374 |
| HYOU1   | 22.9773 | 23.012  | 23.1012 | 22.8236 | 22.9026 | 22.9513 | 23.3129 | 23.0101 | 23.1906 |
| IARS    | 22.1555 | 21.3734 | 21.8653 | 21.9681 | 21.7487 | 21.8708 | 22.2116 | 21.8178 | 22.0424 |
| IARS2   | 21.1672 | 21.2489 | 21.284  | 21.2037 | 21.1224 | 20.9659 | 21.1764 | 20.9918 | 21.1454 |
| ICAM1   | 21.0011 | 21.0892 | 21.1143 | 20.8833 | 20.8927 | 21.4681 | 21.648  | 21.3267 | 21.5757 |
| IDE     | 19.9091 | 19.4418 | 19.706  | 19.7435 | 19.6931 | 19.7172 | 20.0879 | 19.8133 | 20.1751 |
| IDH1    | 21.0645 | 20.4645 | 21.2116 | 20.9839 | 20.9435 | 20.9198 | 21.23   | 20.8955 | 20.901  |
| IDH2    | 20.6057 | 20.4658 | 20.4025 | 20.3003 | 20.3817 | 20.2464 | 20.693  | 20.4959 | 20.3476 |
| IDH3A   | 21.5303 | 21.6849 | 21.7306 | 21.5626 | 21.2568 | 21.5998 | 21.671  | 21.5058 | 21.7605 |
| IDH3B   | 19.7316 | 19.1773 | 19.4659 | 19.2241 | 19.3091 | 19.317  | 19.7589 | 19.5744 | 19.6673 |
| IDH3G   | 20.325  | 20.1271 | 20.114  | 20.0757 | 19.8804 | 19.9916 | 20.0916 | 20.0588 | 20.0938 |
| IER3IP1 | 18.872  | 18.735  | 18.6002 | 19.1613 | 18.3759 | 18.9649 | 18.6434 | 18.9059 | 18.4268 |
| IFI16   | 19.8951 | 19.7882 | 20.0258 | 19.7188 | 19.7144 | 19.9503 | 20.3696 | 19.8102 | 19.7986 |
| IFI35   | 18.1318 | 17.7998 | 17.4962 | 17.5715 | 17.6047 | 17.5064 | 17.9462 | 17.6348 | 17.409  |
| IFITM1  | 18.5468 | 19.0975 | 18.7346 | 19.1503 | 18.7298 | 18.3189 | 17.9898 | 18.385  | 18.7236 |
| IGBP1   | 18.3027 | 18.4919 | 18.6955 | 18.5476 | 18.315  | 18.3616 | 19.0141 | 18.2912 | 18.3778 |
| IGF2BP2 | 20.9241 | 20.7941 | 20.6204 | 20.5118 | 20.565  | 20.8258 | 21.1534 | 20.8173 | 21.2501 |
| IGF2R   | 20.5173 | 20.3469 | 20.5994 | 20.3599 | 20.1213 | 20.2295 | 20.4479 | 20.0307 | 20.5813 |
| IGSF8   | 17.5957 | 17.3466 | 17.2916 | 17.6503 | 17.225  | 18.1096 | 18.3346 | 18.1267 | 17.7188 |
| IK      | 18.9052 | 19.4015 | 19.0637 | 19.3327 | 18.8123 | 18.9749 | 18.0576 | 18.9752 | 19.6032 |
| IKBIP   | 20.3187 | 20.527  | 20.3958 | 20.4917 | 20.2506 | 20.3036 | 20.6605 | 20.4067 | 20.5886 |
| IKBKAP  | 19.4307 | 19.2549 | 19.0624 | 19.0037 | 18.9849 | 19.2018 | 19.6091 | 19.4498 | 19.5193 |
| ILF2    | 24.3035 | 24.1648 | 24.2684 | 24.1244 | 24.0144 | 24.0263 | 24.3442 | 24.1478 | 24.341  |
| ILF3    | 22.9505 | 23.024  | 23.0688 | 22.9611 | 22.5575 | 22.7476 | 23.0581 | 22.7978 | 23.041  |
| ILK     | 19.798  | 18.5443 | 19.6246 | 19.8318 | 19.5382 | 19.8564 | 19.7488 | 19.6085 | 20.0032 |
| ILKAP   | 20.0653 | 19.5278 | 20.2117 | 19.6508 | 19.8987 | 20.0844 | 20.4518 | 19.9819 | 20.0144 |
| ILVBL   | 19.749  | 19.6011 | 19.5094 | 19.6966 | 19.4331 | 19.2933 | 19.6015 | 19.5601 | 19.8369 |
| IMMT    | 22.6333 | 22.351  | 22.8538 | 22.5877 | 22.7388 | 22.3715 | 23.1024 | 22.4571 | 22.734  |
| IMP3    | 18.1791 | 18.2794 | 18.3798 | 18.2131 | 17.977  | 18.2244 | 18.2876 | 18.2028 | 18.488  |
| IMP4    | 18.8091 | 18.2708 | 18.5214 | 18.4213 | 18.3675 | 18.4732 | 18.059  | 18.3163 | 17.7088 |
| IMPA1   | 20.2389 | 20.1655 | 20.0494 | 20.1742 | 19.9193 | 19.8319 | 19.6789 | 19.7955 | 19.9239 |
| IMPDH1  | 19.713  | 19.6544 | 19.793  | 19.4725 | 19.5602 | 19.9154 | 20.1866 | 19.7044 | 19.6477 |
| IMPDH2  | 23.7784 | 23.4453 | 23.4796 | 23.391  | 23.3205 | 23.2351 | 23.7148 | 23.464  | 23.5586 |
| INCENP  | 17.2864 | 17.3982 | 17.4304 | 18.1066 | 17.3483 | 18.0531 | 18.2736 | 17.7567 | 18.6301 |
| INF2    | 19.1801 | 19.0798 | 19.0869 | 19.2821 | 18.9311 | 19.7633 | 20.1114 | 19.6147 | 19.7562 |
| INPP5F  | 16.0298 | 15.7888 | 16.8546 | 16.7801 | 16.3371 | 15.1378 | 14.8423 | 15.6895 | 15.4708 |
| INPL1   | 18.3883 | 18.1889 | 18.3625 | 18.2009 | 18.1025 | 18.2912 | 18.5866 | 18.1353 | 18.2442 |
| INTS1   | 16.9446 | 17.2655 | 17.402  | 17.1866 | 17.0484 | 16.6937 | 17.4872 | 17.3722 | 17.4458 |
| INTS3   | 19.3901 | 19.1936 | 19.4227 | 19.3849 | 19.2626 | 18.7721 | 19.7116 | 19.3122 | 19.3929 |
| INTS4   | 17.0443 | 16.8772 | 17.0162 | 16.5733 | 16.7389 | 16.3397 | 16.8329 | 16.8412 | 16.8964 |
| INTS5   | 16.9954 | 16.9285 | 17.0473 | 17.0123 | 17.0234 | 16.8467 | 17.318  | 16.8869 | 16.9294 |
| IPO11   | 18.2499 | 18.276  | 18.1916 | 18.0159 | 18.3973 | 17.7858 | 18.2676 | 18.047  | 18.212  |
| IPO4    | 20.7902 | 21.0203 | 20.6153 | 20.6907 | 20.5568 | 20.1276 | 20.6815 | 20.4215 | 20.4918 |
| IPO5    | 22.9162 | 22.7424 | 22.7708 | 22.5881 | 22.5335 | 22.5033 | 22.9685 | 22.7789 | 22.8986 |
| IPO7    | 20.6192 | 20.4673 | 20.8179 | 20.5743 | 20.6635 | 20.1305 | 20.5765 | 20.3214 | 20.3314 |
| IPO8    | 18.478  | 19.0783 | 18.5483 | 18.2506 | 18.4058 | 18.0355 | 18.8055 | 18.4857 | 18.6616 |
| IPO9    | 21.3581 | 21.1129 | 21.362  | 21.3247 | 21.1033 | 21.075  | 21.4699 | 21.3387 | 21.4931 |
| IQGAP1  | 23.5351 | 22.2453 | 22.3215 | 22.3293 | 22.1503 | 22.0023 | 22.2203 | 22.2642 | 22.2599 |
| IQGAP3  | 19.0667 | 18.9711 | 19.1716 | 19.0699 | 18.9141 | 18.6589 | 18.8391 | 18.5986 | 18.8123 |
| IRF2BP1 | 18.473  | 18.8605 | 18.7586 | 18.5297 | 18.3669 | 18.7942 | 19.0415 | 18.4619 | 18.5681 |
| IRF2BP2 | 20.3423 | 19.7401 | 19.9195 | 20.0507 | 19.9137 | 20.1596 | 20.169  | 19.822  | 19.9097 |
| IRGQ    | 19.7108 | 20.562  | 19.9661 | 19.6399 | 19.7394 | 19.8939 | 20.2418 | 19.6737 | 20.0235 |
| ISOC1   | 19.6786 | 19.7453 | 19.7511 | 19.5746 | 19.5302 | 20.1209 | 20.3679 | 19.9362 | 20.3743 |
| ISY1    | 19.0533 | 19.5374 | 19.2397 | 19.2287 | 19.1238 | 19.5284 | 19.581  | 19.2275 | 19.4328 |
| ISYNA1  | 16.0804 | 16.5076 | 16.5389 | 17.1139 | 15.7829 | 14.3528 | 13.2072 | 15.3906 | 14.8148 |
| ITCH    | 18.8526 | 19.5016 | 18.5172 | 18.5043 | 18.2034 | 18.3269 | 18.9656 | 18.6185 | 18.9069 |

|          |         |         |         |         |         |         |         |         |         |
|----------|---------|---------|---------|---------|---------|---------|---------|---------|---------|
| ITGA2    | 19.9381 | 19.1957 | 19.4874 | 19.0362 | 19.1265 | 18.7502 | 19.3951 | 19.3537 | 19.382  |
| ITGA3    | 21.4783 | 21.3844 | 21.394  | 21.2249 | 21.1261 | 21.1009 | 21.6255 | 21.4253 | 21.6763 |
| ITGA4    | 17.8236 | 17.222  | 17.2608 | 17.2396 | 17.1615 | 16.9933 | 17.2433 | 17.6963 | 17.3896 |
| ITGA5    | 20.0496 | 19.8913 | 19.9484 | 19.8302 | 19.5622 | 19.6296 | 20.1265 | 20.0147 | 20.2198 |
| ITGA6    | 20.3004 | 20.4303 | 20.8239 | 20.23   | 20.3506 | 20.038  | 20.3026 | 20.1611 | 20.1871 |
| ITGAV    | 20.6857 | 20.5313 | 20.4207 | 20.5593 | 20.4054 | 20.2431 | 20.7969 | 20.4813 | 20.384  |
| ITGB1    | 23.4631 | 23.2153 | 23.2715 | 23.1779 | 23.0684 | 23.4075 | 23.655  | 23.4774 | 23.4941 |
| ITGB3    | 19.9524 | 19.8692 | 19.8219 | 19.8605 | 19.7544 | 19.9671 | 20.3443 | 20.0728 | 20.407  |
| ITGB8    | 19.8974 | 19.7103 | 19.5664 | 19.4416 | 19.5062 | 20.1333 | 20.6653 | 19.5622 | 19.6826 |
| ITPA     | 19.9764 | 19.9334 | 20.2161 | 20.0253 | 20.0554 | 20.0158 | 20.1214 | 19.9923 | 19.864  |
| ITPK1    | 19.0103 | 18.4131 | 19.1002 | 18.7831 | 18.6652 | 19.6319 | 19.9706 | 19.7572 | 19.3472 |
| ITPR3    | 18.3337 | 17.9734 | 17.9958 | 17.8311 | 17.8117 | 18.1933 | 18.5105 | 18.3135 | 18.1904 |
| IVD      | 19.5582 | 19.6957 | 19.1464 | 19.1561 | 19.3135 | 19.5323 | 20.0729 | 19.3777 | 19.3295 |
| JMJD6    | 19.079  | 19.4562 | 18.9329 | 19.2958 | 18.8913 | 18.5747 | 18.418  | 19.0028 | 19.0195 |
| KARS     | 23.1281 | 23.1105 | 23.1243 | 23.1046 | 22.9349 | 22.7848 | 23.2468 | 22.9174 | 23.0618 |
| KAT7     | 18.9349 | 18.271  | 18.6705 | 18.6175 | 17.9763 | 18.2745 | 18.3609 | 18.6514 | 18.6558 |
| KBTBD3   | 18.1723 | 24.7532 | 17.5492 | 17.6666 | 17.7102 | 17.8605 | 18.5234 | 18.1807 | 18.4301 |
| KCMF1    | 16.3537 | 16.3042 | 16.0694 | 15.8572 | 16.2741 | 13.0319 | 15.3823 | 16.3881 | 16.1181 |
| KCTD5    | 18.109  | 17.1551 | 17.4419 | 17.2182 | 17.5885 | 17.2693 | 17.5931 | 17.6823 | 17.568  |
| KDELC1   | 16.3063 | 16.499  | 16.775  | 16.8548 | 16.7979 | 16.3011 | 15.6968 | 16.2445 | 15.6591 |
| KDELR1   | 20.1759 | 20.1468 | 20.1536 | 19.7947 | 20.1885 | 19.9141 | 19.0234 | 19.9743 | 19.61   |
| KDM1A    | 20.0523 | 20.1235 | 20.3684 | 20.1825 | 20.272  | 20.1288 | 20.6491 | 20.4108 | 20.3754 |
| KDM2A    | 19.3762 | 18.3287 | 18.3895 | 18.0817 | 18.1002 | 17.7154 | 18.1866 | 17.9997 | 17.9548 |
| KDM3B    | 17.9625 | 17.8259 | 17.5804 | 17.8803 | 17.628  | 17.4077 | 17.443  | 17.6341 | 17.4551 |
| KDM5D    | 16.2971 | 16.268  | 16.1466 | 15.7389 | 16.4107 | 16.5328 | 16.1167 | 16.3124 | 15.5888 |
| KDSR     | 19.2392 | 19.0385 | 19.2256 | 19.0575 | 19.0375 | 18.6056 | 18.9261 | 18.9332 | 18.9573 |
| KHDRBS1  | 23.1544 | 23.0494 | 22.6588 | 22.9297 | 22.6273 | 22.7547 | 22.7472 | 22.6637 | 22.9629 |
| KHSRP    | 23.0818 | 22.5785 | 23.1969 | 23.2537 | 23.0647 | 23.3379 | 23.4093 | 23.1652 | 23.2944 |
| KIAA0020 | 19.1419 | 19.3145 | 19.6328 | 19.2424 | 19.368  | 18.3946 | 19.9637 | 19.4759 | 19.1481 |
| KIAA0196 | 18.5939 | 18.3362 | 18.1921 | 18.5301 | 18.1842 | 17.8322 | 17.9318 | 17.7404 | 17.9641 |
| KIAA0391 | 17.4741 | 17.4846 | 17.5255 | 17.2051 | 17.2697 | 17.6679 | 17.7499 | 17.4975 | 17.3138 |
| KIAA1279 | 19.0867 | 18.6663 | 18.7159 | 18.6973 | 18.6838 | 18.6534 | 19.1723 | 18.7666 | 18.9458 |
| KIAA1429 | 18.0936 | 18.2715 | 18.4644 | 17.9063 | 18.3571 | 18.2516 | 18.4853 | 18.378  | 17.9377 |
| KIAA1468 | 17.3134 | 16.9122 | 17.2891 | 17.1056 | 17.0455 | 17.1029 | 17.5044 | 17.343  | 17.4389 |
| KIAA1524 | 17.7351 | 17.7838 | 17.6768 | 18.3928 | 17.8372 | 17.6776 | 17.451  | 17.5773 | 17.6528 |
| KIAA1967 | 21.6244 | 21.0849 | 21.6487 | 21.613  | 21.367  | 21.2266 | 21.511  | 21.1403 | 21.3817 |
| KIAA2013 | 18.084  | 17.6617 | 17.9379 | 17.724  | 17.9801 | 17.4342 | 18.1157 | 18.0698 | 17.9094 |
| KIF11    | 18.5885 | 18.7732 | 18.5765 | 18.5082 | 18.3101 | 18.1337 | 18.6067 | 18.5686 | 18.6562 |
| KIF15    | 17.9579 | 17.2901 | 17.5257 | 18.1617 | 17.7878 | 17.7437 | 17.5241 | 17.9471 | 17.9328 |
| KIF20A   | 18.0119 | 17.7323 | 17.7615 | 17.7193 | 17.8592 | 15.9687 | 17.1953 | 17.1596 | 17.1882 |
| KIF23    | 18.6664 | 19.1534 | 19.139  | 19.1451 | 18.9046 | 18.5079 | 19.0231 | 18.9229 | 19.0344 |
| KIF2A    | 18.8238 | 18.8363 | 18.6949 | 18.6386 | 18.4507 | 18.1738 | 18.5032 | 18.3989 | 18.7036 |
| KIF2C    | 18.5714 | 18.4159 | 18.311  | 18.3926 | 18.1657 | 18.1811 | 18.1485 | 18.3357 | 18.3773 |
| KIF4A    | 17.4202 | 18.1866 | 18.3256 | 17.4362 | 17.7214 | 17.6895 | 17.8956 | 17.8122 | 17.9822 |
| KIF5B    | 21.5596 | 21.2303 | 21.2445 | 21.3839 | 21.1696 | 21.4937 | 21.9152 | 21.5142 | 21.6874 |
| KIFAP3   | 14.9512 | 15.835  | 15.8002 | 16.3962 | 15.8474 | 14.8657 | 14.8537 | 15.3872 | 14.9236 |
| KLC1     | 20.1515 | 20.3525 | 20.1215 | 20.2789 | 19.8683 | 20.2704 | 20.1173 | 20.1108 | 20.5178 |
| KLC2     | 19.8419 | 19.356  | 19.8415 | 19.7911 | 19.742  | 20.0375 | 20.1939 | 19.9399 | 20.1624 |
| KPNA1    | 18.5533 | 19.0559 | 18.6464 | 18.8616 | 18.8631 | 18.6134 | 18.8506 | 18.5892 | 18.9502 |
| KPNA2    | 22.4153 | 22.4821 | 22.6165 | 22.3035 | 22.2614 | 22.2898 | 22.5309 | 22.3675 | 22.5851 |
| KPNA3    | 20.3238 | 19.7518 | 20.0669 | 20.0559 | 19.9765 | 19.8922 | 20.248  | 19.8854 | 20.1212 |
| KPNA4    | 20.4843 | 19.6322 | 20.0398 | 19.8288 | 19.9666 | 20.0401 | 19.9093 | 19.7672 | 19.8323 |
| KPNA6    | 21.3289 | 21.3498 | 21.3321 | 21.1834 | 21.1902 | 21.3302 | 21.6947 | 21.5329 | 21.6021 |
| KPNB1    | 24.0535 | 24.0621 | 24.0016 | 24.0593 | 23.6329 | 23.5919 | 23.4568 | 23.7237 | 24.0981 |
| KRT1     | 26.7607 | 20.7552 | 21.0741 | 22.0683 | 21.2554 | 21.5791 | 21.7466 | 21.099  | 21.1075 |
| KRT10    | 24.8755 | 21.1975 | 21.478  | 21.3062 | 21.0877 | 21.2231 | 21.0292 | 21.0891 | 21.1323 |

|          |         |         |         |         |         |         |         |         |         |
|----------|---------|---------|---------|---------|---------|---------|---------|---------|---------|
| KRT14    | 22.4517 | 16.5842 | 16.6019 | 16.979  | 16.7086 | 16.3744 | 17.3511 | 16.542  | 16.6052 |
| KRT18    | 17.0927 | 17.0103 | 16.9649 | 17.7172 | 17.3099 | 16.8617 | 16.9675 | 17.7617 | 17.5447 |
| KRT2     | 23.3553 | 20.0915 | 20.0155 | 20.1063 | 19.9393 | 20.6258 | 21.1129 | 20.52   | 22.2727 |
| KRT5     | 21.2824 | 14.8194 | 14.6649 | 13.4372 | 14.199  | 16.1066 | 14.4478 | 14.1739 | 14.4654 |
| KRT6C    | 21.3663 | 15.1479 | 13.4911 | 15.4429 | 14.5676 | 13.9941 | 14.9861 | 13.8073 | 14.9163 |
| KRT9     | 26.5721 | 19.2654 | 19.2188 | 20.7848 | 19.7685 | 20.1008 | 20.7644 | 19.8747 | 20.2949 |
| KRTCAP2  | 18.7172 | 19.0584 | 18.7156 | 18.8787 | 18.4508 | 18.3806 | 18.7258 | 18.2864 | 18.8302 |
| KTN1     | 20.7887 | 20.6163 | 20.5262 | 20.5539 | 20.3519 | 20.8173 | 21.1879 | 20.6586 | 20.5539 |
| KYNU     | 20.2475 | 20.0756 | 20.1686 | 20.1045 | 20.0359 | 20.9204 | 21.4077 | 21.0838 | 20.8285 |
| L1CAM    | 18.1462 | 18.0486 | 17.9617 | 17.9794 | 17.9531 | 18.7825 | 18.9352 | 18.8309 | 18.7289 |
| L2HGDH   | 15.8882 | 16.5881 | 16.3085 | 16.4269 | 16.6139 | 16.369  | 16.2795 | 16.6357 | 16.3765 |
| L3HYPDH  | 19.5848 | 19.5677 | 19.3713 | 19.3913 | 19.4379 | 20.3623 | 20.1844 | 19.9379 | 19.8567 |
| LAMA4    | 17.3562 | 16.6897 | 17.0312 | 17.3399 | 17.0289 | 16.6516 | 16.7822 | 16.8788 | 16.6822 |
| LAMB1    | 20.1952 | 20.1712 | 19.8062 | 19.9295 | 19.8714 | 19.5413 | 19.8329 | 19.7972 | 20.1651 |
| LAMC1    | 19.2153 | 19.1932 | 18.8435 | 19.0785 | 18.8795 | 18.3474 | 18.733  | 18.6536 | 18.7605 |
| LAMP1    | 20.8832 | 20.148  | 20.8202 | 21.0529 | 20.9193 | 20.894  | 21.3066 | 20.8777 | 21.2753 |
| LAMP2    | 20.1086 | 19.9721 | 20.1276 | 20.1505 | 20.0033 | 19.8624 | 20.4619 | 20.0863 | 20.5754 |
| LAMTOR1  | 20.5513 | 20.3845 | 20.4107 | 20.3175 | 20.3227 | 20.5666 | 20.4831 | 20.2887 | 20.3033 |
| LAMTOR2  | 19.6013 | 19.6563 | 19.4947 | 19.486  | 19.3393 | 19.0802 | 19.0994 | 19.3709 | 19.5022 |
| LANCL1   | 20.3707 | 20.4109 | 20.4029 | 20.3713 | 20.2947 | 20.7123 | 20.5321 | 20.438  | 20.4814 |
| LANCL2   | 19.8139 | 19.903  | 19.6879 | 19.8333 | 19.6468 | 19.6686 | 19.5076 | 19.574  | 19.6968 |
| LAP3     | 22.0027 | 21.9981 | 22.0818 | 21.8869 | 21.8681 | 22.1171 | 22.355  | 21.8441 | 22.0479 |
| LARP1    | 18.9101 | 19.155  | 19.1936 | 19.1216 | 18.9418 | 18.9224 | 19.2281 | 19.1557 | 19.1557 |
| LARP4    | 19.7658 | 19.867  | 19.8509 | 20.0619 | 19.8623 | 20.037  | 20.0793 | 19.8435 | 20.0741 |
| LARP4B   | 17.872  | 17.6424 | 17.6528 | 17.6675 | 17.9385 | 18.4188 | 17.7732 | 17.4825 | 17.2087 |
| LARS     | 21.6559 | 21.6558 | 21.5538 | 21.3778 | 21.2974 | 21.296  | 21.588  | 21.4781 | 21.4678 |
| LAS1L    | 19.0893 | 18.811  | 18.8391 | 18.8592 | 18.6261 | 18.819  | 19.0317 | 18.6712 | 18.9121 |
| LASP1    | 20.0659 | 20.8418 | 19.988  | 20.2466 | 19.9015 | 20.1393 | 20.1237 | 19.7978 | 20.2109 |
| LCN2     | 14.6788 | 15.3566 | 14.965  | 16.2416 | 15.7879 | 18.8601 | 18.9424 | 18.9697 | 19.2304 |
| LDHA     | 26.2043 | 26.1962 | 26.0597 | 26.1873 | 26.0699 | 26.5387 | 26.7502 | 26.3209 | 26.4823 |
| LDHB     | 25.678  | 25.6935 | 25.6613 | 25.459  | 25.4002 | 25.5774 | 25.8569 | 25.5707 | 25.7416 |
| LDLR     | 17.6243 | 17.4172 | 17.7597 | 17.5533 | 17.4739 | 17.4327 | 18.0393 | 17.8554 | 18.06   |
| LEMD2    | 18.1919 | 18.1376 | 17.525  | 18.0772 | 17.3789 | 17.8823 | 17.418  | 17.9099 | 18.4287 |
| LEO1     | 20.2499 | 20.046  | 19.9166 | 19.9458 | 19.822  | 19.6684 | 19.9199 | 19.8977 | 19.796  |
| LEPRE1   | 20.6252 | 20.0939 | 20.5984 | 20.5621 | 20.1897 | 20.3116 | 20.8088 | 20.3692 | 20.538  |
| LEPREL2  | 19.2087 | 18.8323 | 19.0802 | 18.7652 | 18.9369 | 18.5597 | 18.549  | 18.7218 | 18.5369 |
| LEPREL4  | 18.5719 | 18.4958 | 18.358  | 18.4634 | 18.0207 | 18.0042 | 18.0467 | 18.248  | 18.2027 |
| LETM1    | 20.0127 | 19.9669 | 19.7122 | 19.8931 | 19.7256 | 19.7853 | 20.1819 | 19.8801 | 20.1298 |
| LGALS1   | 24.327  | 24.7568 | 24.3954 | 24.6745 | 24.4885 | 25.0354 | 25.321  | 24.8562 | 25.1489 |
| LGALS3   | 20.052  | 20.2642 | 20.0366 | 20.1846 | 20.0312 | 20.1632 | 20.5392 | 20.5374 | 20.559  |
| LGALS3BP | 19.0944 | 19.4028 | 19.2781 | 18.9577 | 19.2341 | 19.5484 | 19.8155 | 19.5789 | 19.6797 |
| LGALS8   | 17.7691 | 17.6471 | 17.8859 | 17.6717 | 17.724  | 17.4547 | 18.0927 | 17.7145 | 17.4725 |
| LGMN     | 15.2677 | 15.8415 | 15.5333 | 16.5853 | 15.4306 | 16.1962 | 13.9731 | 15.2132 | 15.167  |
| LIG1     | 17.1767 | 17.5788 | 17.4523 | 17.7812 | 17.2987 | 17.2901 | 16.5941 | 17.4654 | 17.5238 |
| LIG3     | 19.4809 | 19.6476 | 19.6983 | 19.5136 | 19.5501 | 19.5554 | 19.3562 | 19.3812 | 19.4061 |
| LIMA1    | 21.832  | 22.3198 | 21.6625 | 21.3372 | 21.4485 | 21.2581 | 21.4443 | 21.2716 | 21.2822 |
| LIMS1    | 19.5478 | 19.5878 | 19.7269 | 19.6379 | 19.4289 | 19.5724 | 19.3725 | 19.3667 | 19.694  |
| LIN7C    | 21.6501 | 22.3097 | 21.9294 | 21.9699 | 21.9205 | 22.1038 | 21.5272 | 21.9049 | 22.2854 |
| LIPA     | 19.31   | 18.5577 | 18.7085 | 18.6067 | 18.7403 | 16.9069 | 18.8191 | 18.6446 | 18.7995 |
| LMAN1    | 22.1242 | 21.7715 | 21.6411 | 21.8251 | 21.3833 | 21.6572 | 21.7355 | 22.0184 | 22.2507 |
| LMAN2    | 22.2761 | 21.9448 | 22.1844 | 22.1158 | 22.1103 | 22.2897 | 22.5648 | 22.1397 | 22.5222 |
| LMAN2L   | 18.9415 | 18.9987 | 18.8076 | 18.321  | 18.4991 | 18.7056 | 18.9768 | 18.8628 | 18.9211 |
| LMCD1    | 18.3371 | 17.8428 | 18.4228 | 18.3101 | 18.1713 | 18.7688 | 18.9188 | 18.7218 | 18.5538 |
| LMNA     | 26.0806 | 25.8168 | 26.0785 | 25.8452 | 25.7273 | 26.064  | 26.3064 | 25.9658 | 26.2088 |
| LMNB1    | 23.5926 | 23.7357 | 23.6265 | 23.5706 | 23.2522 | 23.221  | 23.5606 | 23.3885 | 23.781  |
| LMNB2    | 21.6864 | 22.6737 | 22.1282 | 22.162  | 22.009  | 21.9545 | 22.3094 | 21.9631 | 22.2141 |

|           |         |         |         |         |         |         |         |         |         |
|-----------|---------|---------|---------|---------|---------|---------|---------|---------|---------|
| LMO7      | 19.2087 | 18.5876 | 18.907  | 18.8121 | 18.9874 | 19.0127 | 19.3316 | 18.7525 | 19.0777 |
| LNPEP     | 18.3309 | 18.2012 | 18.0762 | 18.0236 | 17.971  | 17.7158 | 18.2328 | 18.2567 | 18.1546 |
| LONP1     | 20.9882 | 20.7932 | 20.6997 | 20.4372 | 20.8213 | 20.7112 | 21.2161 | 20.7811 | 20.7519 |
| LOXL2     | 18.9048 | 18.5404 | 18.5367 | 18.4617 | 18.4677 | 18.4886 | 18.5994 | 18.5814 | 18.54   |
| LPCAT1    | 18.1627 | 18.5272 | 18.5316 | 18.492  | 18.4913 | 18.7158 | 18.8377 | 18.5739 | 18.5515 |
| LPP       | 19.3791 | 19.1836 | 18.8344 | 19.2212 | 18.6035 | 18.4936 | 17.8723 | 18.1677 | 18.9524 |
| LRCH1     | 17.6558 | 17.6554 | 17.8232 | 17.6302 | 16.9711 | 16.8611 | 17.3362 | 17.6312 | 17.5726 |
| LRPAP1    | 19.591  | 19.1072 | 19.3711 | 19.3659 | 19.1892 | 19.7105 | 19.6336 | 19.3623 | 19.2083 |
| LRPPRC    | 22.5528 | 22.3174 | 22.4497 | 22.2625 | 22.3555 | 22.2646 | 22.9037 | 22.5575 | 22.7763 |
| LRRC1     | 14.8374 | 15.2396 | 15.8251 | 14.7853 | 14.886  | 14.2624 | 15.1188 | 14.8548 | 14.6376 |
| LRRC40    | 18.9695 | 18.9935 | 18.9906 | 18.7442 | 18.6015 | 18.8973 | 19.0405 | 18.9227 | 18.8913 |
| LRRC47    | 21.029  | 20.2189 | 20.8483 | 20.7333 | 20.6809 | 20.6912 | 21.059  | 20.7655 | 20.8274 |
| LRRC59    | 23.0228 | 22.8794 | 22.8134 | 22.6801 | 22.5095 | 22.9632 | 23.2002 | 22.7644 | 22.8424 |
| LRRFIP1   | 18.895  | 18.3581 | 18.6669 | 18.5717 | 18.4841 | 18.8666 | 19.0908 | 18.7906 | 19.1686 |
| LRWD1     | 19.8664 | 19.5985 | 19.6497 | 19.4808 | 19.3456 | 19.2129 | 19.7199 | 19.9452 | 19.7779 |
| LSG1      | 18.2627 | 18.423  | 18.4989 | 18.5755 | 18.4752 | 18.5208 | 19.0353 | 18.6213 | 18.8643 |
| LSM1      | 18.8599 | 18.8605 | 18.8111 | 18.9181 | 19.0396 | 18.727  | 18.8772 | 18.587  | 18.7207 |
| LSM12     | 19.9358 | 19.5782 | 19.6597 | 19.6333 | 19.5135 | 20.0112 | 20.1534 | 19.9207 | 19.9791 |
| LSM14A    | 16.3623 | 16.1128 | 17.4995 | 17.9153 | 17.1917 | 16.9934 | 17.3132 | 17.446  | 17.9591 |
| LSM2      | 20.6393 | 20.6587 | 20.447  | 20.3632 | 20.347  | 20.4584 | 20.3308 | 20.3476 | 20.5712 |
| LSM4      | 19.5257 | 19.5129 | 19.7784 | 19.5929 | 19.3635 | 19.4135 | 19.3258 | 19.5404 | 19.2062 |
| LSM6      | 19.5739 | 14.3986 | 19.5134 | 19.1027 | 19.7664 | 19.8715 | 20.0925 | 19.5849 | 19.6873 |
| LTA4H     | 21.4507 | 21.4186 | 21.3193 | 21.2512 | 21.0868 | 21.3078 | 21.4516 | 21.3958 | 21.4265 |
| LUC7L2    | 21.8263 | 21.3695 | 21.373  | 21.4022 | 21.1695 | 21.5328 | 21.2861 | 21.349  | 21.4314 |
| LUC7L3    | 20.483  | 20.4751 | 20.5286 | 20.502  | 20.3628 | 20.1238 | 20.731  | 20.5059 | 20.7944 |
| LUZP1     | 19.1503 | 18.828  | 18.9971 | 18.757  | 18.5909 | 18.8813 | 18.6916 | 18.9124 | 19.0719 |
| LYPLA1    | 20.747  | 20.2892 | 20.7155 | 20.6725 | 20.6042 | 21.1531 | 21.2444 | 20.9181 | 21.0849 |
| LYPLA2    | 19.7598 | 19.211  | 19.486  | 19.7796 | 19.5197 | 19.5895 | 19.5167 | 19.468  | 19.4622 |
| M6PR      | 21.6005 | 21.9215 | 21.5828 | 21.7545 | 21.7026 | 21.7608 | 22.108  | 21.7292 | 21.8503 |
| MACF1     | 18.8906 | 18.5754 | 18.7542 | 18.4829 | 18.6745 | 18.7794 | 19.1075 | 18.9137 | 18.9248 |
| MACROD1   | 20.0897 | 19.2642 | 19.6961 | 19.7    | 19.5722 | 19.887  | 19.9682 | 19.7996 | 19.9194 |
| MAD1L1    | 22.708  | 19.4816 | 23.0034 | 23.0873 | 22.8828 | 22.0147 | 22.7303 | 22.6377 | 23.1587 |
| MAD2L1    | 19.657  | 19.8164 | 19.6004 | 19.514  | 19.5738 | 20.0082 | 19.6468 | 19.4573 | 19.6264 |
| MAGEA1    | 17.3917 | 17.7603 | 17.6243 | 17.5681 | 17.5405 | 17.0529 | 17.3968 | 17.3036 | 17.1287 |
| MAGEA10   | 21.4429 | 21.2126 | 21.1875 | 21.4713 | 21.1063 | 20.9494 | 21.2242 | 21.7185 | 21.1646 |
| MAGEA3    | 18.7464 | 18.4195 | 18.6357 | 18.7251 | 18.4578 | 18.3027 | 18.5647 | 18.1629 | 18.4292 |
| MAGEA6    | 19.5184 | 18.8212 | 19.456  | 19.4055 | 19.3927 | 19.1852 | 19.4704 | 19.5068 | 19.3829 |
| MAGED2    | 20.9544 | 20.7855 | 20.8041 | 20.7453 | 20.6496 | 20.7214 | 20.5811 | 20.668  | 20.7424 |
| MAGOH     | 22.7991 | 22.8011 | 22.7172 | 22.664  | 22.8483 | 22.6788 | 22.885  | 22.6783 | 22.7269 |
| MAGT1     | 20.081  | 19.8027 | 19.75   | 19.6493 | 19.5209 | 19.3986 | 19.037  | 19.259  | 19.516  |
| MAK16     | 17.2263 | 17.6149 | 17.3252 | 17.3133 | 17.39   | 17.4338 | 17.5128 | 17.4445 | 17.0428 |
| MALSU1    | 16.7375 | 15.7424 | 16.8034 | 16.4368 | 16.5452 | 16.7546 | 17.1088 | 16.9146 | 16.6911 |
| MALT1     | 18.3364 | 17.7488 | 17.5163 | 17.7852 | 17.349  | 17.5959 | 17.8176 | 17.6503 | 17.8529 |
| MANF      | 22.2164 | 22.1326 | 22.0315 | 22.1371 | 21.8383 | 22.2033 | 22.1021 | 22.2329 | 22.3561 |
| MAP1B     | 21.7028 | 21.5201 | 21.5122 | 21.3584 | 21.2857 | 21.4831 | 21.7097 | 21.4165 | 21.6307 |
| MAP1LC3B2 | 20.6935 | 21.0145 | 20.9006 | 20.987  | 20.7463 | 21.0567 | 20.7387 | 20.7666 | 20.733  |
| MAP1S     | 17.4678 | 17.4477 | 17.713  | 17.5126 | 17.6629 | 17.5588 | 18.0985 | 17.8399 | 18.0751 |
| MAP2K1    | 17.4749 | 18.5489 | 17.8598 | 17.9556 | 17.6315 | 17.9013 | 18.099  | 17.5775 | 17.9814 |
| MAP2K2    | 18.7606 | 18.2479 | 18.8644 | 18.8084 | 18.8218 | 18.9235 | 19.5655 | 18.8341 | 18.9895 |
| MAP2K3    | 15.7512 | 15.7096 | 16.0273 | 17.1039 | 16.0351 | 16.9446 | 16.7666 | 16.8439 | 16.4499 |
| MAP4      | 22.1265 | 22.035  | 22.0458 | 21.9822 | 21.9163 | 22.1107 | 21.9233 | 22.1004 | 22.4224 |
| MAP4K4    | 18.6873 | 18.7367 | 18.5988 | 18.5594 | 18.3959 | 18.2932 | 18.476  | 18.5294 | 19.072  |
| MAPK1     | 22.0128 | 22.0724 | 22.1183 | 22.0789 | 21.8206 | 21.8535 | 22.0399 | 21.8135 | 22.0644 |
| MAPK14    | 19.0936 | 19.2033 | 18.9982 | 18.9303 | 18.959  | 19.1612 | 19.2947 | 19.0558 | 18.8197 |
| MAPRE1    | 22.8176 | 22.6069 | 22.5971 | 22.5439 | 22.4453 | 22.9422 | 22.9805 | 22.7536 | 22.7164 |
| MARCH5    | 18.6931 | 17.2141 | 18.5656 | 18.2623 | 18.4347 | 17.9233 | 18.8382 | 18.4402 | 18.4967 |

|          |         |         |         |         |         |         |         |         |         |
|----------|---------|---------|---------|---------|---------|---------|---------|---------|---------|
| MARCKS   | 20.5254 | 20.8316 | 20.5013 | 20.5735 | 20.5133 | 20.3532 | 20.8659 | 20.3918 | 20.6637 |
| MARS     | 21.6437 | 21.5421 | 21.4515 | 21.3991 | 21.4883 | 21.6368 | 22.0207 | 21.5348 | 21.5946 |
| MAT2A    | 23.1195 | 23.1292 | 22.8987 | 23.0393 | 22.8052 | 22.9982 | 23.085  | 22.8132 | 23.0673 |
| MAT2B    | 20.519  | 19.8386 | 20.248  | 20.1795 | 20.1715 | 20.2644 | 20.568  | 20.118  | 20.1763 |
| MATR3    | 23.7082 | 23.6071 | 23.5662 | 23.662  | 23.331  | 23.1062 | 23.2819 | 23.2826 | 23.5653 |
| MAVS     | 19.8373 | 19.4163 | 19.8055 | 19.7759 | 19.8145 | 20.2472 | 20.5672 | 20.1274 | 20.1701 |
| MBD3     | 17.7566 | 17.735  | 17.1486 | 17.559  | 17.2567 | 17.0349 | 17.2534 | 17.0474 | 17.2667 |
| MBNL2    | 20.863  | 21.0261 | 20.9742 | 20.7972 | 20.8467 | 21.1363 | 21.153  | 20.9205 | 20.8985 |
| MBOAT7   | 19.8996 | 20.0505 | 19.8813 | 19.7607 | 19.7641 | 19.5562 | 20.1055 | 19.7044 | 20.1047 |
| MCAM     | 22.1152 | 22.1397 | 21.6835 | 21.9572 | 21.5758 | 21.566  | 21.6242 | 21.3974 | 21.7885 |
| MCCC2    | 19.0561 | 18.917  | 18.8239 | 18.8525 | 18.8292 | 18.8478 | 19.3352 | 18.8093 | 18.9256 |
| MCM2     | 23.1683 | 22.8795 | 23.113  | 22.91   | 22.7446 | 22.3485 | 22.8824 | 22.8264 | 22.77   |
| MCM3     | 23.1263 | 22.7705 | 22.6911 | 22.8092 | 22.6411 | 22.5784 | 22.9844 | 22.7278 | 22.8992 |
| MCM4     | 23.1528 | 22.9398 | 23.0639 | 22.8465 | 22.7346 | 22.674  | 22.8561 | 22.7252 | 22.897  |
| MCM5     | 22.4547 | 21.3827 | 22.7396 | 22.4281 | 22.5038 | 22.5803 | 22.6157 | 22.3391 | 22.3331 |
| MCM6     | 22.6311 | 22.8438 | 22.785  | 22.4575 | 22.5489 | 22.433  | 22.6264 | 22.4666 | 22.8698 |
| MCM7     | 23.1227 | 23.059  | 23.0318 | 22.8967 | 22.896  | 22.969  | 23.3449 | 23.0253 | 23.135  |
| MCMBP    | 21.617  | 22.0453 | 22.2195 | 21.8193 | 22.0344 | 22.4636 | 21.9163 | 22.0798 | 22.0906 |
| MCTS1    | 17.9019 | 18.1072 | 17.7069 | 18.2534 | 17.4809 | 17.3726 | 17.1289 | 17.7136 | 17.6609 |
| MDC1     | 18.3158 | 17.711  | 17.9195 | 17.9416 | 17.7643 | 18.1831 | 18.2065 | 18.2078 | 18.1266 |
| MDH1     | 23.0554 | 22.974  | 23.0934 | 23.1316 | 23.1443 | 23.1646 | 23.3315 | 23.095  | 23.3432 |
| MDH2     | 24.9194 | 24.5874 | 24.4886 | 24.5714 | 24.3268 | 24.7923 | 25.0301 | 24.7804 | 24.9258 |
| MDN1     | 17.2124 | 17.3467 | 17.4863 | 17.1546 | 17.4581 | 16.8411 | 17.6806 | 17.2237 | 17.136  |
| ME1      | 20.0627 | 19.5685 | 19.6559 | 19.4341 | 19.5226 | 19.8188 | 19.8209 | 19.9774 | 19.6569 |
| ME2      | 21.5474 | 21.7208 | 21.5047 | 21.6216 | 21.3764 | 21.5913 | 21.8734 | 21.6395 | 21.9709 |
| MECR     | 15.7126 | 16.0224 | 16.1438 | 16.5247 | 16.2282 | 16.3596 | 15.2143 | 16.4744 | 16.6337 |
| MED14    | 16.8422 | 17.0765 | 17.1245 | 16.8259 | 16.9955 | 16.7447 | 17.428  | 16.7721 | 17.1971 |
| MED20    | 17.8355 | 17.4342 | 17.4413 | 17.6817 | 17.2582 | 17.9819 | 17.7701 | 17.79   | 17.7761 |
| MED23    | 15.4229 | 15.9693 | 15.9136 | 15.6706 | 15.7879 | 15.4581 | 15.2397 | 15.5539 | 15.0101 |
| MEMO1    | 18.4694 | 19.6057 | 19.8621 | 19.5013 | 19.5659 | 19.0002 | 19.5549 | 19.6142 | 19.7302 |
| MEN1     | 16.2831 | 16.2702 | 16.2952 | 16.5237 | 16.9159 | 17.2618 | 17.8767 | 16.7556 | 17.1841 |
| MEPCE    | 17.8941 | 17.0864 | 17.7988 | 18.2661 | 18.0273 | 17.9979 | 17.9793 | 17.7754 | 18.0684 |
| MESDC2   | 20.7024 | 20.8224 | 20.6442 | 20.358  | 20.3641 | 20.6097 | 20.5134 | 20.6162 | 20.8188 |
| METAP1   | 21.1167 | 20.6681 | 20.855  | 20.6431 | 20.5094 | 20.5729 | 20.7245 | 20.8664 | 20.8265 |
| METAP2   | 21.5465 | 20.9495 | 21.6223 | 21.5667 | 21.6665 | 21.5833 | 21.5471 | 21.7391 | 21.5001 |
| METTTL13 | 19.6489 | 19.1221 | 19.2051 | 19.1034 | 19.082  | 18.9338 | 19.1798 | 19.2493 | 18.7422 |
| METTTL16 | 19.016  | 18.5524 | 18.4348 | 18.595  | 17.9379 | 18.0815 | 17.8198 | 18.3601 | 18.6674 |
| MFAP1    | 19.5174 | 19.5913 | 19.4507 | 19.59   | 19.3574 | 19.3121 | 19.6218 | 19.3265 | 19.6617 |
| MGEA5    | 17.906  | 18.0108 | 18.1024 | 18.0711 | 18.1153 | 17.972  | 18.2722 | 18.1025 | 18.0034 |
| MGLL     | 17.9989 | 17.626  | 17.7727 | 17.7959 | 17.9125 | 15.0329 | 17.6336 | 17.742  | 17.0159 |
| MGME1    | 18.3427 | 18.3255 | 18.2351 | 18.1569 | 18.1211 | 18.3281 | 18.1296 | 17.9822 | 18.0386 |
| MGST1    | 21.5035 | 21.7529 | 21.3243 | 21.5087 | 21.3413 | 22.0145 | 22.0464 | 21.6959 | 22.1028 |
| MGST3    | 20.3114 | 20.8018 | 20.6193 | 20.3742 | 20.7006 | 20.368  | 19.9106 | 20.0604 | 20.4197 |
| MIA3     | 17.4172 | 17.5443 | 17.3463 | 17.1632 | 17.3108 | 17.6332 | 17.7814 | 17.6221 | 18.1134 |
| MICAL3   | 18.7637 | 18.5772 | 18.5692 | 18.4331 | 18.314  | 18.4432 | 18.8328 | 18.7984 | 18.7629 |
| MICALL1  | 18.4495 | 17.8044 | 18.504  | 18.2369 | 18.4851 | 18.3932 | 19.0693 | 18.7484 | 18.7986 |
| MIF      | 24.5583 | 24.2171 | 24.304  | 24.4538 | 24.0043 | 24.6972 | 24.7014 | 24.5437 | 24.651  |
| MINA     | 18.1549 | 18.2482 | 18.3781 | 17.4229 | 17.9719 | 17.1167 | 17.6836 | 17.8936 | 17.9811 |
| MINPP1   | 17.6568 | 17.35   | 17.3621 | 17.3248 | 17.5569 | 19.4189 | 16.9625 | 17.3845 | 17.2547 |
| MIPEP    | 17.8665 | 18.0706 | 18.0089 | 18.2436 | 17.8616 | 18.0993 | 18.0157 | 18.0662 | 18.186  |
| MKI67    | 18.365  | 18.4913 | 18.3532 | 18.355  | 18.2256 | 18.415  | 18.6096 | 18.0319 | 18.2508 |
| MKI67IP  | 18.8819 | 18.9301 | 18.6537 | 18.5839 | 18.457  | 18.4931 | 18.1216 | 18.5818 | 18.7598 |
| MLEC     | 21.7946 | 21.6963 | 21.9165 | 21.7368 | 21.4754 | 21.3308 | 21.6063 | 21.4524 | 21.7994 |
| MLH1     | 15.842  | 16.4803 | 16.0363 | 16.1957 | 17.4589 | 16.3757 | 16.7777 | 16.0871 | 16.7046 |
| MMS19    | 19.8432 | 19.4674 | 19.5235 | 19.5269 | 19.4213 | 19.3359 | 19.5844 | 19.3654 | 19.216  |
| MMTAG2   | 16.4135 | 17.8663 | 18.0934 | 18.1463 | 17.2389 | 17.9296 | 18.1008 | 16.9618 | 18.2217 |

|           |         |         |         |         |         |         |         |         |         |
|-----------|---------|---------|---------|---------|---------|---------|---------|---------|---------|
| MNAT1     | 19.4498 | 19.5949 | 19.3829 | 19.1071 | 19.3025 | 19.556  | 19.4976 | 19.0369 | 19.5906 |
| MOB1B     | 20.324  | 20.3225 | 20.4445 | 20.1458 | 20.1173 | 19.9308 | 20.1967 | 19.9152 | 20.0573 |
| MOB4      | 17.6748 | 17.3499 | 17.09   | 16.6612 | 17.088  | 15.9558 | 17.5871 | 16.9301 | 16.603  |
| MOCS2     | 15.802  | 16.4219 | 16.227  | 17.0184 | 16.865  | 16.249  | 15.6855 | 16.4561 | 15.5392 |
| MOCS3     | 17.1965 | 17.5757 | 17.8835 | 17.3928 | 17.379  | 18.2124 | 17.6521 | 17.5955 | 17.9646 |
| MOGS      | 21.6278 | 21.4591 | 21.4857 | 21.308  | 21.1321 | 21.4827 | 21.5508 | 21.4471 | 21.4023 |
| MON2      | 18.5477 | 18.2799 | 18.2957 | 18.0394 | 17.8685 | 17.7878 | 18.4012 | 18.024  | 18.3911 |
| MORF4L1   | 18.7097 | 18.8752 | 18.875  | 18.8386 | 18.5096 | 19.0927 | 19.1526 | 18.9882 | 18.9129 |
| MOV10     | 18.4236 | 17.8794 | 18.2795 | 18.2763 | 18.048  | 18.148  | 18.3653 | 18.2801 | 18.2038 |
| MPDU1     | 20.059  | 19.8952 | 19.8025 | 19.6897 | 19.7151 | 19.6056 | 19.6746 | 19.671  | 19.457  |
| MPHOSPH10 | 16.9295 | 17.4549 | 17.7469 | 18.0913 | 17.8814 | 17.697  | 16.8307 | 17.5028 | 17.7107 |
| MPHOSPH8  | 16.6006 | 16.887  | 16.8174 | 16.4557 | 16.7127 | 16.9652 | 17.0122 | 16.9982 | 16.4414 |
| MPP5      | 15.4648 | 16.8137 | 16.4974 | 16.4848 | 17.0353 | 16.8465 | 16.9457 | 16.4422 | 16.655  |
| MPP6      | 18.7002 | 19.5986 | 19.5147 | 18.6741 | 18.6756 | 19.9622 | 20.3671 | 19.8664 | 20.1037 |
| MPRIP     | 17.4712 | 17.4914 | 17.6198 | 17.5288 | 17.3779 | 18.0152 | 17.6999 | 17.9467 | 18.0755 |
| MPST      | 20.6921 | 20.6189 | 20.1718 | 20.7339 | 20.6951 | 18.5965 | 19.6874 | 20.583  | 20.0596 |
| MRC2      | 16.2892 | 16.5617 | 16.4467 | 16.195  | 16.4145 | 14.1798 | 16.6309 | 16.3081 | 16.3671 |
| MRE11A    | 18.5664 | 18.4019 | 18.4641 | 18.524  | 18.1653 | 18.1796 | 18.5623 | 18.4811 | 18.5095 |
| MRI1      | 18.7084 | 18.4046 | 18.5365 | 18.5795 | 18.4506 | 18.6095 | 18.2746 | 18.6266 | 18.621  |
| MRPL1     | 18.9728 | 19.0337 | 19.1504 | 19.5146 | 19.0715 | 19.1778 | 19.5378 | 19.1255 | 19.0995 |
| MRPL10    | 19.1761 | 19.1323 | 19.1266 | 18.5369 | 18.8679 | 18.572  | 18.9315 | 18.9571 | 18.8757 |
| MRPL11    | 19.0783 | 19.2042 | 19.5102 | 19.0401 | 19.0818 | 19.2666 | 19.5331 | 19.0839 | 19.1908 |
| MRPL13    | 19.8762 | 19.7103 | 19.7225 | 19.5977 | 19.6376 | 20.1399 | 20.2363 | 19.9695 | 20.0902 |
| MRPL15    | 18.4327 | 18.7616 | 18.1729 | 18.0223 | 18.2091 | 18.9211 | 19.1359 | 18.7736 | 18.9072 |
| MRPL16    | 18.4492 | 18.6714 | 19.1103 | 19.1314 | 19.2621 | 19.3776 | 19.5526 | 18.5861 | 19.214  |
| MRPL17    | 19.6946 | 19.5162 | 19.4189 | 19.3942 | 19.2359 | 19.5861 | 19.8551 | 19.4033 | 19.4771 |
| MRPL21    | 19.5323 | 18.6673 | 19.506  | 19.7372 | 19.612  | 19.9945 | 19.8308 | 19.5138 | 19.4876 |
| MRPL24    | 19.4934 | 18.0471 | 19.5303 | 19.7356 | 19.5196 | 19.7535 | 20.11   | 19.6612 | 19.9077 |
| MRPL28    | 16.8412 | 17.4148 | 17.6951 | 16.9554 | 17.2461 | 17.2303 | 17.942  | 17.5689 | 17.5954 |
| MRPL3     | 19.2854 | 19.1984 | 18.9138 | 19.1384 | 19.0523 | 19.0374 | 19.099  | 19.0663 | 18.8882 |
| MRPL37    | 20.2673 | 19.9535 | 20.0886 | 20.0824 | 19.9156 | 19.9478 | 20.2253 | 20.2321 | 20.2819 |
| MRPL38    | 19.5026 | 19.5347 | 19.4745 | 19.3075 | 19.0513 | 19.4742 | 19.9569 | 19.6277 | 19.5873 |
| MRPL39    | 19.5356 | 19.4363 | 19.38   | 19.1333 | 19.2781 | 20.0221 | 19.284  | 19.1522 | 19.0252 |
| MRPL4     | 19.9631 | 19.8892 | 19.838  | 19.8093 | 19.5932 | 19.955  | 20.295  | 19.8903 | 19.7855 |
| MRPL44    | 18.9585 | 18.8373 | 18.781  | 19.0266 | 18.7062 | 18.8277 | 18.8704 | 18.9876 | 18.8353 |
| MRPL45    | 20.3216 | 20.3967 | 20.2729 | 20.3886 | 20.3123 | 20.1619 | 20.0897 | 19.9367 | 19.9378 |
| MRPL47    | 18.1993 | 18.0759 | 17.8354 | 18.0985 | 18.0859 | 18.0895 | 17.7889 | 18.3719 | 18.2397 |
| MRPL48    | 18.1399 | 18.508  | 18.8097 | 18.5779 | 18.245  | 18.2225 | 18.8183 | 18.6047 | 18.9061 |
| MRPL49    | 18.8363 | 18.7341 | 18.5282 | 18.7755 | 18.5866 | 18.5091 | 19.3116 | 18.7688 | 18.8811 |
| MRPS10    | 18.8066 | 18.4169 | 18.4796 | 17.9707 | 18.0768 | 18.4217 | 18.3328 | 18.222  | 17.8729 |
| MRPS17    | 19.5817 | 19.165  | 19.031  | 19.3277 | 19.1597 | 19.7371 | 19.6237 | 19.6671 | 19.0758 |
| MRPS2     | 19.3551 | 19.9265 | 19.5267 | 19.3874 | 19.4537 | 19.5545 | 19.9153 | 19.5257 | 19.6988 |
| MRPS22    | 19.8902 | 20.1455 | 19.9484 | 19.9115 | 19.7908 | 19.9553 | 19.8677 | 19.9578 | 20.1396 |
| MRPS23    | 20.1072 | 20.1697 | 19.9441 | 19.9222 | 19.6186 | 19.9439 | 20.2063 | 19.8995 | 19.9523 |
| MRPS27    | 18.7112 | 18.0936 | 18.444  | 17.866  | 18.4302 | 18.8265 | 18.9151 | 18.5843 | 18.1114 |
| MRPS28    | 19.2649 | 18.2031 | 19.3886 | 19.7934 | 19.4611 | 19.6895 | 19.8979 | 19.527  | 19.816  |
| MRPS30    | 19.3786 | 18.5204 | 19.0913 | 18.7588 | 18.69   | 18.8234 | 18.9168 | 18.6416 | 19.0073 |
| MRPS34    | 19.623  | 19.5768 | 19.7188 | 19.2682 | 19.3493 | 19.3513 | 19.8149 | 19.6434 | 19.6477 |
| MRPS35    | 19.0418 | 18.7777 | 18.8536 | 18.9948 | 18.8689 | 18.7044 | 18.8225 | 18.9394 | 19.0104 |
| MRPS6     | 19.3612 | 19.1583 | 19.1589 | 19.0882 | 18.9831 | 19.3247 | 19.1724 | 19.2217 | 19.2079 |
| MRPS9     | 17.8308 | 17.8938 | 18.0142 | 17.6589 | 17.6336 | 17.3452 | 17.9888 | 17.9668 | 17.9903 |
| MRT04     | 20.9441 | 21.1116 | 20.8665 | 21.1211 | 20.8024 | 21.1228 | 20.8618 | 20.883  | 21.0017 |
| MSH2      | 21.01   | 21.055  | 21.1989 | 20.9697 | 20.8729 | 20.5452 | 21.0813 | 20.8259 | 20.9299 |
| MSH6      | 21.3782 | 21.6876 | 22.2419 | 21.1985 | 21.9134 | 21.2102 | 22.0863 | 21.1005 | 21.3316 |
| MSI2      | 20.0796 | 19.6382 | 19.6756 | 19.7454 | 19.8494 | 19.9248 | 19.5807 | 19.8222 | 19.6336 |
| MSN       | 22.8147 | 23.3278 | 22.8331 | 22.6751 | 22.615  | 22.9223 | 23.1945 | 22.8799 | 23.2016 |

|         |         |         |         |         |         |         |         |         |         |
|---------|---------|---------|---------|---------|---------|---------|---------|---------|---------|
| MSTO1   | 19.0337 | 17.3742 | 19.2855 | 19.2116 | 19.4638 | 19.3289 | 19.9812 | 19.4649 | 19.4738 |
| MTA1    | 18.1724 | 17.9783 | 18.0246 | 17.8815 | 17.8093 | 17.9588 | 18.1457 | 18.1779 | 18.2247 |
| MTA2    | 21.4924 | 21.7677 | 21.286  | 21.2077 | 21.0811 | 21.1833 | 21.5883 | 21.2346 | 21.561  |
| MTAP    | 20.7184 | 20.311  | 20.3403 | 20.3774 | 20.3537 | 20.6485 | 20.6693 | 20.4084 | 20.3061 |
| MTCH2   | 20.9988 | 21.4661 | 21.6321 | 20.8601 | 21.7336 | 21.1675 | 22.3421 | 20.8623 | 21.0734 |
| MT-CO2  | 21.6742 | 21.6661 | 21.4921 | 21.5766 | 21.3798 | 21.6969 | 22.2173 | 21.7974 | 21.9085 |
| MTDH    | 19.9665 | 19.8882 | 19.8631 | 19.7876 | 19.6133 | 19.5793 | 19.7384 | 19.8051 | 19.9516 |
| MTHFD1  | 22.523  | 22.5563 | 22.8016 | 22.382  | 22.3898 | 22.5936 | 23.0237 | 22.6163 | 22.8466 |
| MTHFD1L | 22.3362 | 20.2163 | 22.0744 | 22.0835 | 22.0081 | 22.167  | 22.5481 | 22.0903 | 22.5558 |
| MTHFD2  | 22.406  | 22.3812 | 22.2897 | 22.2803 | 22.3321 | 22.4451 | 22.7525 | 22.3228 | 22.495  |
| MTIF2   | 16.5021 | 16.7052 | 16.9774 | 16.0944 | 16.5336 | 16.2205 | 16.6437 | 16.8248 | 16.3851 |
| MT-ND4  | 17.6922 | 17.6031 | 16.6026 | 17.4702 | 17.7987 | 17.3126 | 16.6021 | 17.3822 | 17.7243 |
| MTOR    | 18.1223 | 17.9481 | 17.8325 | 17.6559 | 17.8163 | 17.7179 | 17.6668 | 17.7277 | 17.6171 |
| MTPN    | 21.3483 | 21.3564 | 21.3892 | 21.6349 | 21.5639 | 21.9463 | 22.3246 | 21.6398 | 22.0234 |
| MTX1    | 18.8744 | 18.3832 | 18.5785 | 18.6228 | 18.2649 | 18.5933 | 18.7219 | 18.7005 | 18.5052 |
| MTX2    | 18.2326 | 18.3668 | 18.1813 | 18.1408 | 18.0382 | 18.2011 | 17.4991 | 17.9421 | 18.1212 |
| MUT     | 18.0891 | 17.5558 | 17.8823 | 17.9751 | 17.7531 | 17.8744 | 18.1071 | 18.0128 | 18.0366 |
| MYADM   | 20.3305 | 20.5057 | 20.3221 | 20.4056 | 20.243  | 20.3751 | 20.6925 | 20.3043 | 20.4715 |
| MYBBP1A | 20.0328 | 20.046  | 20.3122 | 20.1942 | 19.8425 | 20.0821 | 20.3993 | 19.9776 | 20.2855 |
| MYD88   | 15.2173 | 14.9177 | 15.4185 | 15.2392 | 14.8762 | 16.0157 | 15.0642 | 15.2719 | 15.233  |
| MYH10   | 21.1913 | 20.7522 | 20.8083 | 20.5988 | 20.6763 | 20.6741 | 20.9485 | 20.5315 | 20.6902 |
| MYH9    | 24.2292 | 24.2411 | 24.1723 | 24.097  | 24.0772 | 24.1745 | 24.3297 | 24.0206 | 24.1321 |
| MYL12A  | 22.9222 | 22.974  | 22.7958 | 22.9905 | 22.7892 | 22.9349 | 23.0762 | 22.945  | 23.315  |
| MYL6    | 22.9135 | 23.0209 | 23.0234 | 22.951  | 22.8763 | 22.9854 | 23.4447 | 23.0194 | 23.3619 |
| MYO18A  | 17.4032 | 17.4038 | 17.371  | 16.7946 | 16.5266 | 16.8224 | 16.1194 | 16.9298 | 16.9596 |
| MYO19   | 16.4489 | 17.3034 | 17.8193 | 16.2121 | 16.9384 | 16.1332 | 18.18   | 16.0968 | 16.4922 |
| MYO1B   | 19.1209 | 19.6753 | 19.8247 | 19.5802 | 19.2638 | 19.4043 | 20.0372 | 19.4034 | 19.5678 |
| MYO1C   | 21.5886 | 21.8335 | 21.568  | 21.5674 | 21.1816 | 21.4123 | 21.9046 | 21.645  | 21.7755 |
| MYO1E   | 17.7415 | 17.4661 | 17.9815 | 18.0159 | 17.9885 | 17.4179 | 17.7448 | 17.8125 | 18.0692 |
| MYO5A   | 16.1352 | 16.5662 | 16.7309 | 16.3478 | 16.5957 | 15.2167 | 16.6864 | 16.5122 | 16.346  |
| MYO6    | 16.3974 | 16.2034 | 16.3233 | 16.5603 | 16.1664 | 14.8984 | 14.2823 | 14.6076 | 14.1839 |
| MYOF    | 22.1637 | 21.9962 | 21.9871 | 21.8606 | 21.9549 | 21.6752 | 22.2027 | 21.8922 | 21.813  |
| NAA10   | 18.5655 | 17.9739 | 17.5887 | 18.6749 | 17.5261 | 17.5192 | 16.382  | 17.5141 | 18.4475 |
| NAA11   | 16.6013 | 16.7708 | 16.2193 | 17.5879 | 15.8907 | 15.8845 | 13.9506 | 15.622  | 15.9181 |
| NAA15   | 21.1156 | 21.1609 | 21.4631 | 21.1241 | 21.1948 | 20.8852 | 21.3498 | 20.9598 | 21.1938 |
| NAA25   | 17.4212 | 18.3498 | 18.106  | 18.013  | 17.7979 | 18.1827 | 18.0565 | 18.1108 | 18.4572 |
| NAA38   | 18.7639 | 19.1379 | 19.0005 | 19.1466 | 18.8457 | 19.2355 | 19.0649 | 19.3707 | 18.9627 |
| NAA50   | 20.6739 | 20.7235 | 20.778  | 20.7479 | 20.612  | 20.91   | 20.931  | 20.5932 | 20.6572 |
| NACA    | 22.8965 | 22.8388 | 22.9699 | 22.8732 | 22.8729 | 22.743  | 23.1817 | 22.8025 | 22.9879 |
| NACC1   | 17.588  | 18.521  | 18.2112 | 18.4567 | 18.3266 | 18.4491 | 18.6599 | 18.314  | 18.5027 |
| NAE1    | 19.9444 | 19.9552 | 19.944  | 20.0442 | 20.0275 | 19.9726 | 19.8653 | 20.1473 | 20.0572 |
| NAGK    | 18.6124 | 19.176  | 19.4364 | 19.0361 | 19.0357 | 18.8188 | 18.9712 | 18.8479 | 18.8763 |
| NAMPT   | 23.2348 | 23.0261 | 23.0322 | 23.047  | 22.9496 | 23.0025 | 23.2768 | 23.0947 | 23.1373 |
| NANS    | 20.9707 | 20.6109 | 20.5254 | 20.4944 | 20.401  | 20.744  | 21.0377 | 20.7788 | 20.9342 |
| NAP1L1  | 23.1753 | 23.022  | 23.0715 | 23.0744 | 22.8702 | 23.0028 | 22.9293 | 23.044  | 23.0523 |
| NAP1L4  | 21.9753 | 22.1717 | 22.0621 | 22.2836 | 21.9847 | 22.2159 | 22.3994 | 22.0845 | 22.2079 |
| NAPA    | 21.4794 | 20.9106 | 20.9444 | 20.8485 | 20.7187 | 20.8557 | 21.0322 | 20.9527 | 20.9871 |
| NAPG    | 17.6611 | 18.5085 | 18.8091 | 18.3648 | 18.4453 | 18.392  | 18.3499 | 18.0989 | 18.4397 |
| NARS    | 23.7818 | 23.5024 | 23.5597 | 23.9538 | 23.5426 | 23.4122 | 23.6381 | 23.6931 | 23.5736 |
| NARS2   | 17.9387 | 18.3006 | 17.7398 | 18.1152 | 17.6665 | 17.6169 | 16.9376 | 17.5484 | 17.9552 |
| NASP    | 21.5118 | 20.7747 | 21.6355 | 21.9537 | 21.9193 | 22.0915 | 22.4607 | 21.7028 | 22.0494 |
| NAT10   | 18.6734 | 19.0781 | 18.9045 | 18.623  | 18.9839 | 18.6926 | 19.2989 | 18.8332 | 18.7576 |
| NBN     | 17.49   | 18.1754 | 17.4389 | 17.7323 | 17.7591 | 17.2098 | 17.9292 | 17.5117 | 17.831  |
| NCAPD2  | 21.175  | 21.0148 | 21.2107 | 20.9104 | 20.9637 | 20.8424 | 21.2835 | 20.863  | 21.0531 |
| NCAPD3  | 17.4514 | 17.4611 | 17.6046 | 17.6623 | 17.4399 | 17.4218 | 17.3455 | 17.4426 | 17.5225 |
| NCAPG   | 22.4382 | 22.3408 | 22.262  | 22.5256 | 22.4165 | 21.8827 | 22.2617 | 22.1536 | 22.7087 |

|          |         |         |         |         |         |         |         |         |         |
|----------|---------|---------|---------|---------|---------|---------|---------|---------|---------|
| NCAPG2   | 18.3316 | 18.3777 | 18.2998 | 18.3448 | 18.3889 | 17.944  | 18.5029 | 18.1175 | 18.1423 |
| NCAPH    | 20.0107 | 21.7213 | 19.9387 | 20.2375 | 19.7438 | 19.7098 | 19.8385 | 19.7155 | 19.8513 |
| NCBP1    | 22.9053 | 21.4587 | 22.9473 | 22.994  | 22.8448 | 23.018  | 22.7007 | 22.8886 | 23.1512 |
| NCDN     | 19.1286 | 19.423  | 19.3473 | 19.2945 | 19.1667 | 19.1195 | 19.2652 | 19.3277 | 19.079  |
| NCEH1    | 21.9717 | 22.0887 | 22.9036 | 21.5551 | 22.6381 | 22.8726 | 22.5367 | 22.7793 | 22.2042 |
| NCK2     | 17.7852 | 17.2312 | 17.8875 | 17.5106 | 17.5696 | 17.6422 | 18.1798 | 17.9081 | 18.2329 |
| NCKAP1   | 19.7551 | 19.6344 | 19.7652 | 19.5063 | 19.7564 | 19.4375 | 19.7059 | 19.6649 | 19.5693 |
| NCL      | 25.3468 | 25.6456 | 25.5987 | 25.4878 | 25.2239 | 25.3185 | 26.008  | 25.4335 | 25.7068 |
| NCLN     | 20.4844 | 20.4373 | 20.3538 | 20.3014 | 20.1055 | 20.3396 | 20.4926 | 20.2725 | 20.2031 |
| NCOA5    | 19.3204 | 18.3848 | 18.8653 | 19.2418 | 18.5535 | 19.3393 | 18.6782 | 18.8265 | 19.1554 |
| NCSTN    | 19.928  | 19.7777 | 19.812  | 19.611  | 19.5675 | 19.4426 | 20.0015 | 19.5812 | 19.8158 |
| NDRG1    | 19.8247 | 19.7923 | 19.678  | 19.9305 | 19.4656 | 19.6616 | 18.7643 | 19.4811 | 19.6869 |
| NDRG3    | 20.5945 | 20.676  | 20.6409 | 20.4265 | 20.4864 | 20.8116 | 21.2657 | 20.4904 | 20.5602 |
| NDUFA11  | 19.2366 | 19.5098 | 19.2127 | 19.0398 | 19.3231 | 20.071  | 19.4519 | 19.4739 | 19.5581 |
| NDUFA13  | 19.4283 | 19.4287 | 19.376  | 19.0089 | 19.2837 | 19.5377 | 19.9381 | 19.4983 | 19.592  |
| NDUFA4   | 21.7381 | 21.2042 | 21.2278 | 21.213  | 21.146  | 21.3892 | 21.3764 | 21.4644 | 21.3634 |
| NDUFA5   | 20.0425 | 19.646  | 19.5753 | 19.6822 | 19.5007 | 19.8599 | 19.8342 | 19.7296 | 19.7694 |
| NDUFA8   | 19.7657 | 18.8604 | 19.3816 | 19.5739 | 19.2438 | 19.7815 | 20.047  | 19.6968 | 19.7326 |
| NDUFA9   | 19.9431 | 19.6125 | 19.442  | 19.5193 | 19.6447 | 18.9725 | 19.636  | 19.5387 | 19.606  |
| NDUFAF3  | 18.2928 | 17.1131 | 18.3427 | 17.8368 | 18.2081 | 18.5033 | 18.7224 | 18.5327 | 18.5345 |
| NDUFAF7  | 18.249  | 18.2963 | 18.0463 | 18.1515 | 17.9385 | 18.0824 | 18.5677 | 18.283  | 18.631  |
| NDUFB10  | 20.4139 | 20.2303 | 20.0616 | 19.6789 | 19.9856 | 20.1645 | 20.462  | 19.9404 | 19.847  |
| NDUFB11  | 20.4961 | 19.9804 | 20.1692 | 20.2189 | 20.1916 | 20.3168 | 20.2836 | 20.3312 | 20.6751 |
| NDUFB3   | 20.0408 | 20.4603 | 20.169  | 20.1128 | 19.9331 | 20.2335 | 20.22   | 20.1262 | 20.4702 |
| NDUFS1   | 20.4569 | 20.1861 | 20.2606 | 20.4199 | 20.2224 | 20.1304 | 20.3598 | 20.383  | 20.4813 |
| NDUFS2   | 20.1573 | 20.5668 | 20.5909 | 20.3633 | 20.5046 | 20.2275 | 20.4406 | 20.1165 | 20.4029 |
| NDUFS3   | 21.4666 | 21.393  | 21.2265 | 21.2002 | 21.0948 | 21.232  | 21.4997 | 21.359  | 21.522  |
| NDUFS5   | 19.0967 | 19.9479 | 19.6692 | 19.5478 | 19.3953 | 19.7241 | 20.0108 | 19.6427 | 19.8824 |
| NDUFS8   | 18.5247 | 18.7934 | 18.4606 | 18.488  | 18.5099 | 17.6292 | 18.1595 | 18.7548 | 18.2905 |
| NDUFV1   | 21.6056 | 20.9324 | 20.9061 | 20.5275 | 20.7666 | 20.731  | 21.1368 | 20.9618 | 20.9926 |
| NDUFV2   | 19.577  | 19.4617 | 19.4652 | 19.2427 | 19.5473 | 20.004  | 20.3687 | 19.8489 | 19.9907 |
| NECAP1   | 18.1868 | 18.4842 | 18.2994 | 18.2732 | 18.2546 | 18.573  | 19.0552 | 18.4728 | 18.5307 |
| NECAP2   | 18.2706 | 18.8213 | 18.0758 | 18.348  | 17.8598 | 17.7592 | 17.1758 | 17.7466 | 18.2759 |
| NEDD4L   | 18.6804 | 18.4936 | 18.7928 | 18.5661 | 18.5451 | 18.5858 | 18.9123 | 18.7224 | 18.5226 |
| NEDD8    | 19.9311 | 19.537  | 19.9407 | 19.5488 | 20.0635 | 20.0521 | 19.9968 | 19.7471 | 19.5499 |
| NELFA    | 17.6681 | 17.3202 | 17.5549 | 17.0835 | 17.2766 | 17.2617 | 17.9524 | 17.3327 | 17.6134 |
| NELFB    | 19.0975 | 19.1182 | 19.0165 | 19.0924 | 19.0308 | 18.1213 | 19.1073 | 18.9517 | 18.5119 |
| NELFCD   | 18.9284 | 18.9953 | 19.1269 | 18.87   | 18.9156 | 18.9982 | 19.1639 | 19.1716 | 19.0267 |
| NELFE    | 17.9162 | 16.9276 | 16.874  | 17.0798 | 16.5104 | 17.2247 | 17.0349 | 17.4448 | 17.7378 |
| NES      | 24.2206 | 24.1463 | 24.063  | 23.9504 | 23.8777 | 23.7551 | 24.0666 | 23.7819 | 24.1676 |
| NEU1     | 18.1985 | 18.5227 | 18.3345 | 18.8697 | 18.0794 | 18.8024 | 19.3081 | 18.9966 | 19.0991 |
| NFIC     | 19.0385 | 18.2295 | 19.4153 | 19.345  | 18.8813 | 18.1719 | 18.8331 | 18.7247 | 18.7815 |
| NFKB1    | 19.8477 | 19.4107 | 19.7014 | 19.544  | 19.559  | 20.032  | 20.0104 | 19.9028 | 19.7418 |
| NFKB2    | 20.2498 | 22.7434 | 20.2317 | 20.1117 | 20.4403 | 20.4831 | 20.816  | 20.5742 | 20.5747 |
| NFS1     | 19.0346 | 17.5578 | 18.3064 | 18.5658 | 18.0261 | 18.4831 | 18.6066 | 18.0398 | 18.5019 |
| NFYC     | 17.6439 | 16.7775 | 17.9297 | 17.7533 | 17.9597 | 17.9042 | 18.1176 | 17.9077 | 17.6553 |
| NGFR     | 16.3788 | 16.9156 | 16.8364 | 16.7012 | 16.8838 | 13.0903 | 11.6293 | 12.6969 | 13.7169 |
| NHLRC2   | 19.6249 | 19.435  | 19.3997 | 19.4842 | 19.3696 | 19.3894 | 19.6225 | 19.212  | 19.3282 |
| NHP2     | 20.1786 | 20.1096 | 19.8631 | 19.863  | 19.6918 | 20.0977 | 20.2669 | 19.903  | 19.8451 |
| NHP2L1   | 22.1265 | 21.865  | 22.1048 | 22.2121 | 21.7594 | 22.2304 | 21.9359 | 21.9105 | 22.284  |
| NIF3L1   | 19.6372 | 19.8289 | 20.116  | 19.2671 | 19.6892 | 19.5182 | 19.5333 | 19.4037 | 19.8843 |
| NIP7     | 20.6833 | 20.6844 | 20.8822 | 20.5576 | 20.5518 | 20.7697 | 21.1842 | 20.7584 | 20.7219 |
| NIPSNAP1 | 18.975  | 19.5256 | 19.128  | 19.6614 | 19.3928 | 19.6797 | 19.4912 | 19.6254 | 19.6795 |
| NIT1     | 18.7101 | 18.6242 | 18.5904 | 18.2597 | 18.4916 | 18.7956 | 18.8388 | 18.8283 | 18.7223 |
| NIT2     | 20.1037 | 19.9284 | 20.0016 | 20.075  | 19.9478 | 20.0123 | 19.9537 | 19.9114 | 19.8707 |
| NLE1     | 19.4023 | 19.0784 | 19.1344 | 19.1934 | 18.9672 | 19.1826 | 19.0431 | 19.1325 | 19.1409 |

|        |         |         |         |         |         |         |         |         |         |
|--------|---------|---------|---------|---------|---------|---------|---------|---------|---------|
| NLN    | 20.2363 | 19.957  | 19.9206 | 19.8203 | 19.9066 | 20.2598 | 20.2043 | 20.0515 | 19.9868 |
| NMD3   | 19.0432 | 19.4637 | 19.3157 | 19.2652 | 19.5024 | 18.8694 | 19.2774 | 19.0187 | 19.2655 |
| NME1   | 23.845  | 23.9655 | 23.882  | 23.997  | 23.6551 | 23.8289 | 23.8145 | 23.8921 | 24.0803 |
| NME2   | 24.7119 | 24.7839 | 24.4304 | 24.6225 | 24.5504 | 24.7442 | 24.8902 | 24.5071 | 24.6417 |
| NME3   | 17.8809 | 17.9925 | 17.587  | 17.5303 | 17.6315 | 18.0383 | 18.4425 | 18.0788 | 18.28   |
| NMT1   | 20.6372 | 20.6551 | 20.485  | 20.4496 | 20.4597 | 20.6118 | 20.7383 | 20.3692 | 20.4361 |
| NNMT   | 18.6282 | 18.9702 | 18.8999 | 19.1866 | 18.597  | 18.2911 | 18.0035 | 18.4371 | 18.6385 |
| NNT    | 20.3048 | 20.5423 | 20.5156 | 20.4426 | 20.1255 | 19.9849 | 20.5582 | 20.2154 | 20.4309 |
| NOB1   | 18.53   | 18.7946 | 18.8654 | 18.7046 | 18.6121 | 18.7126 | 18.8132 | 18.6299 | 18.6085 |
| NOC2L  | 20.1803 | 20.714  | 20.452  | 20.4731 | 20.3938 | 20.2483 | 20.7273 | 20.4183 | 20.6149 |
| NOC4L  | 18.4877 | 18.4854 | 18.3708 | 18.0825 | 18.172  | 18.0626 | 18.1539 | 18.0249 | 17.9026 |
| NOL10  | 17.5908 | 17.4362 | 17.9624 | 17.3104 | 17.7314 | 17.5532 | 18.3088 | 17.4504 | 16.973  |
| NOL11  | 19.4845 | 19.3907 | 19.3709 | 19.2664 | 19.057  | 19.6266 | 20.067  | 19.5572 | 19.5501 |
| NOL6   | 20.146  | 19.6737 | 20.3518 | 20.4871 | 20.2939 | 20.2408 | 20.6965 | 20.3661 | 20.5875 |
| NOL8   | 13.0547 | 14.9032 | 15.0671 | 14.5716 | 14.4122 | 14.8813 | 14.6075 | 14.9656 | 13.9328 |
| NOLC1  | 20.9646 | 20.0574 | 20.8959 | 21.0467 | 20.9831 | 21.5205 | 21.7765 | 21.0436 | 21.3274 |
| NOM1   | 16.3984 | 16.6413 | 14.974  | 15.6215 | 16.2327 | 15.3313 | 16.2223 | 16.2387 | 16.03   |
| NOMO3  | 20.5415 | 21.0147 | 21.1306 | 21.0498 | 20.6345 | 20.8779 | 21.0411 | 20.8191 | 21.0296 |
| NONO   | 23.2458 | 24.4196 | 22.8666 | 23.1085 | 22.5375 | 22.8981 | 22.589  | 22.8568 | 23.1793 |
| NOP14  | 17.9551 | 17.5926 | 17.4146 | 17.3406 | 17.4755 | 17.2091 | 17.0179 | 17.7106 | 17.7757 |
| NOP16  | 19.4467 | 19.5672 | 19.4616 | 19.4035 | 19.266  | 19.3127 | 19.6041 | 19.4114 | 19.396  |
| NOP2   | 19.95   | 20.0171 | 19.8737 | 19.9842 | 19.7071 | 19.8146 | 19.8994 | 19.8329 | 19.8398 |
| NOP56  | 21.1547 | 20.2588 | 21.5277 | 20.5369 | 20.422  | 20.8413 | 21.6896 | 21.1546 | 21.0751 |
| NOP58  | 20.8595 | 20.7809 | 20.6989 | 20.5627 | 20.3497 | 20.5861 | 20.6889 | 20.5868 | 20.7907 |
| NOP9   | 17.6111 | 17.1379 | 17.3992 | 17.6044 | 17.4349 | 16.7108 | 17.6039 | 17.3656 | 17.4779 |
| NOSIP  | 19.8048 | 19.433  | 19.5253 | 19.3558 | 19.3354 | 19.4413 | 19.5503 | 19.3007 | 19.292  |
| NPC2   | 18.9239 | 18.7241 | 18.6674 | 19.3446 | 19.0932 | 19.6394 | 19.4034 | 19.4384 | 19.9618 |
| NPEPPS | 21.5601 | 21.5185 | 21.4571 | 21.2869 | 21.2027 | 21.3246 | 21.6891 | 21.4847 | 21.5711 |
| NPLOC4 | 20.9241 | 20.3736 | 20.6258 | 20.553  | 20.3463 | 20.6961 | 20.6838 | 20.8058 | 20.8511 |
| NPM1   | 24.7322 | 24.9064 | 25.2249 | 24.0754 | 25.2225 | 25.0959 | 25.4757 | 24.5416 | 24.9942 |
| NPM3   | 20.3974 | 19.4092 | 20.2633 | 20.3721 | 20.3313 | 20.6783 | 20.2772 | 20.3452 | 20.5486 |
| NPTN   | 19.8534 | 19.9772 | 20.1872 | 20.0281 | 20.0415 | 20.032  | 20.2326 | 19.832  | 20.1001 |
| NQO1   | 24.0659 | 23.5273 | 23.8076 | 23.9011 | 23.5279 | 23.9786 | 24.2478 | 24.1418 | 24.2575 |
| NR2F2  | 18.3544 | 23.0239 | 18.5817 | 18.8624 | 18.4714 | 18.9906 | 18.7933 | 18.5452 | 19.0058 |
| NRD1   | 23.5329 | 23.5565 | 23.5295 | 23.4147 | 23.3485 | 23.6393 | 24.1135 | 23.6099 | 23.5794 |
| NRP1   | 17.9612 | 18.115  | 17.9741 | 18.1097 | 17.4858 | 17.6642 | 18.1141 | 17.9891 | 18.2241 |
| NSA2   | 19.6209 | 19.4852 | 19.0124 | 19.4632 | 19.0711 | 18.8662 | 19.2177 | 19.515  | 19.187  |
| NSDHL  | 20.4476 | 20.4096 | 20.4181 | 20.3213 | 20.1974 | 20.2039 | 20.4884 | 20.2192 | 20.2291 |
| NSF    | 21.4237 | 21.0414 | 20.8235 | 20.7196 | 20.7519 | 20.1522 | 20.7507 | 20.4988 | 20.6631 |
| NSFL1C | 20.7521 | 20.438  | 20.5499 | 20.5567 | 20.5427 | 21.0369 | 21.02   | 20.7396 | 20.8197 |
| NSUN2  | 21.4448 | 21.297  | 21.1494 | 21.1854 | 20.9059 | 21.2091 | 21.5416 | 21.3402 | 21.4883 |
| NT5C   | 16.8408 | 17.3077 | 17.2734 | 17.1508 | 17.2503 | 17.1269 | 17.0733 | 17.23   | 17.2919 |
| NT5C2  | 16.9098 | 17.2016 | 17.4269 | 18.2291 | 17.343  | 16.5301 | 17.1964 | 17.269  | 17.0982 |
| NT5DC1 | 17.6229 | 17.9151 | 17.7668 | 17.7756 | 17.9175 | 17.1216 | 17.3048 | 17.4623 | 17.5172 |
| NT5DC2 | 19.7498 | 20.1154 | 20.0432 | 19.6453 | 19.9194 | 19.8642 | 20.3493 | 19.9307 | 20.1226 |
| NT5E   | 21.2692 | 20.9487 | 21.0743 | 20.8424 | 20.8581 | 21.2477 | 21.6003 | 21.3162 | 21.395  |
| NTMT1  | 18.4444 | 17.6588 | 17.7874 | 17.837  | 18.0651 | 18.6299 | 18.161  | 18.1795 | 17.8705 |
| NTPCR  | 17.8346 | 18.4338 | 18.3333 | 18.2599 | 18.1852 | 18.2466 | 18.4125 | 18.4728 | 18.2535 |
| NUBP1  | 18.9047 | 19.0768 | 18.9599 | 19.1181 | 18.8939 | 19.2095 | 19.3038 | 18.9993 | 18.9171 |
| NUBP2  | 18.8354 | 18.97   | 18.8412 | 19.0439 | 18.6855 | 18.8611 | 18.5732 | 18.6775 | 18.8088 |
| NUCB1  | 18.7516 | 19.9597 | 18.8076 | 19.3871 | 18.4677 | 18.9606 | 18.2139 | 18.5681 | 19.2437 |
| NUCKS1 | 19.5524 | 18.9697 | 18.8713 | 19.1755 | 18.5887 | 18.3438 | 17.5595 | 18.7354 | 18.97   |
| NUDC   | 22.935  | 22.9807 | 22.8826 | 22.8929 | 22.6074 | 22.3057 | 22.0519 | 22.6335 | 23.0261 |
| NUDCD1 | 19.7995 | 20.0432 | 20.0352 | 20.0437 | 19.8269 | 19.6103 | 20.0282 | 19.7738 | 19.7739 |
| NUDCD2 | 16.7302 | 17.7204 | 17.5691 | 18.2292 | 17.7766 | 17.7089 | 17.6133 | 17.7937 | 18.1076 |
| NUDCD3 | 18.0807 | 17.6347 | 17.5923 | 18.1219 | 17.4628 | 16.8005 | 16.8998 | 17.5252 | 17.7055 |

|         |         |         |         |         |         |         |         |         |         |
|---------|---------|---------|---------|---------|---------|---------|---------|---------|---------|
| NUDT15  | 16.177  | 16.1188 | 12.6057 | 16.5841 | 16.5814 | 16.4684 | 15.7646 | 15.853  | 16.8408 |
| NUDT21  | 22.2982 | 22.0813 | 22.4274 | 21.9261 | 21.9252 | 21.8255 | 22.2752 | 22.117  | 22.281  |
| NUDT4   | 19.2549 | 19.2341 | 19.3787 | 18.9391 | 19.0836 | 19.5367 | 19.7875 | 19.2341 | 19.4949 |
| NUDT5   | 21.7294 | 21.6718 | 21.7589 | 21.5258 | 21.6112 | 21.624  | 21.9392 | 21.6188 | 21.5852 |
| NUFIP2  | 19.8204 | 19.8781 | 19.9509 | 19.7331 | 19.7439 | 19.6886 | 19.9333 | 19.8775 | 19.9661 |
| NUMA1   | 21.4549 | 23.668  | 21.0426 | 21.1947 | 21.1524 | 21.3306 | 21.614  | 21.1978 | 21.4749 |
| NUP107  | 19.3742 | 19.7839 | 19.7419 | 19.7069 | 19.7632 | 19.8388 | 20.0243 | 19.702  | 19.8551 |
| NUP133  | 19.6844 | 19.9566 | 19.3402 | 19.3731 | 19.314  | 19.3477 | 19.7191 | 19.2272 | 19.5336 |
| NUP153  | 20.0643 | 20.1982 | 20.1595 | 20.0873 | 19.7419 | 20.1445 | 20.566  | 20.133  | 20.2095 |
| NUP155  | 20.9619 | 20.7877 | 20.6488 | 20.6346 | 20.6635 | 20.372  | 20.8461 | 20.6788 | 20.6307 |
| NUP160  | 19.6145 | 20.4581 | 19.8878 | 20.1222 | 20.2839 | 20.0002 | 19.8273 | 20.0332 | 19.9864 |
| NUP188  | 21.8286 | 22.013  | 21.9197 | 21.6861 | 21.7071 | 22.2623 | 21.1005 | 21.9483 | 21.7104 |
| NUP205  | 21.2029 | 21.0073 | 21.2732 | 21.0518 | 20.918  | 20.8773 | 21.2867 | 20.7725 | 21.047  |
| NUP214  | 19.1884 | 18.7072 | 18.7023 | 18.9743 | 18.3097 | 19.137  | 18.8668 | 18.7793 | 19.1975 |
| NUP35   | 20.0008 | 19.7551 | 19.9461 | 19.9865 | 19.8589 | 20.0748 | 19.9428 | 19.9683 | 20.0026 |
| NUP37   | 20.1633 | 19.5594 | 19.7739 | 19.587  | 19.6695 | 19.9462 | 20.2322 | 20.0994 | 20.1202 |
| NUP43   | 20.3559 | 20.0423 | 20.2233 | 19.9605 | 19.9424 | 20.2283 | 20.6125 | 20.1031 | 20.128  |
| NUP50   | 20.8415 | 21.2769 | 20.5347 | 20.7293 | 20.5476 | 20.5273 | 20.4284 | 20.5739 | 20.8982 |
| NUP54   | 19.6125 | 19.4358 | 19.4045 | 19.1253 | 19.3366 | 19.3368 | 19.6543 | 19.3289 | 19.3321 |
| NUP62   | 18.9087 | 18.816  | 18.8048 | 18.8513 | 18.8364 | 18.3344 | 18.1679 | 18.9234 | 18.6506 |
| NUP85   | 19.2623 | 19.4364 | 19.2474 | 19.1719 | 19.1901 | 20.0867 | 19.2251 | 19.1367 | 19.2181 |
| NUP88   | 19.6909 | 19.8917 | 19.9261 | 19.6867 | 19.4773 | 19.6736 | 20.0379 | 19.813  | 19.9787 |
| NUP93   | 20.8939 | 21.1354 | 21.0286 | 21.0921 | 20.965  | 20.8639 | 21.4411 | 21.1621 | 21.536  |
| NUP98   | 21.1165 | 20.9325 | 20.9727 | 20.8856 | 20.8638 | 20.9061 | 21.0855 | 20.8311 | 20.9914 |
| NUPL1   | 20.3459 | 19.9965 | 20.1855 | 19.8622 | 19.8441 | 19.5832 | 19.9648 | 19.9775 | 19.9604 |
| NUTF2   | 19.6349 | 19.7844 | 19.608  | 20.1632 | 19.6123 | 19.4809 | 18.1936 | 19.6425 | 19.4992 |
| NXF1    | 20.0015 | 20.0625 | 19.9716 | 19.6901 | 19.6157 | 19.5825 | 20.0265 | 19.7641 | 19.9386 |
| OAT     | 21.7415 | 21.6363 | 21.8553 | 21.3532 | 21.504  | 21.2956 | 21.8925 | 21.5015 | 21.5201 |
| OCIAD1  | 20.8907 | 19.4421 | 20.9792 | 20.6872 | 21.0233 | 20.9907 | 21.2889 | 20.8819 | 20.9661 |
| ODR4    | 18.8981 | 18.4844 | 18.602  | 18.4912 | 18.3655 | 18.0082 | 18.4906 | 18.3785 | 18.6832 |
| OGDH    | 20.3007 | 21.3557 | 20.0597 | 20.4147 | 19.7857 | 20.174  | 20.1523 | 19.954  | 20.5113 |
| OGFOD1  | 18.8202 | 18.4618 | 18.7047 | 18.9316 | 18.841  | 19.0156 | 18.2161 | 18.7505 | 18.2929 |
| OGFR    | 19.6919 | 19.3192 | 19.5885 | 19.4859 | 19.4996 | 19.6426 | 19.8117 | 19.6082 | 19.5955 |
| OGT     | 19.4088 | 19.482  | 19.5111 | 19.0591 | 19.0321 | 19.2509 | 19.5628 | 19.2551 | 19.6233 |
| OLA1    | 22.2414 | 22.1476 | 22.2552 | 22.148  | 21.9357 | 21.7612 | 22.3662 | 22.0867 | 22.0965 |
| OPA1    | 21.0081 | 20.6458 | 20.6787 | 20.4465 | 20.3196 | 20.4727 | 20.5702 | 20.5401 | 20.6692 |
| ORC1    | 13.6603 | 20.0193 | 14.4998 | 14.9185 | 15.094  | 16.7133 | 15.6742 | 15.6955 | 15.1255 |
| ORC2    | 17.5837 | 17.6762 | 17.3988 | 17.7012 | 17.2056 | 16.3355 | 17.0059 | 17.7102 | 17.2023 |
| ORC3    | 18.2128 | 17.5098 | 17.9796 | 17.7528 | 17.9108 | 17.1059 | 18.2644 | 17.9212 | 17.5311 |
| ORC4    | 18.4545 | 18.1956 | 18.6128 | 18.4764 | 18.5913 | 18.2757 | 19.0065 | 18.5242 | 18.1869 |
| ORC5    | 18.2989 | 18.1975 | 17.8897 | 17.6244 | 17.4935 | 17.277  | 17.447  | 17.4431 | 17.5833 |
| OSBP    | 18.5989 | 18.4668 | 18.3545 | 18.6627 | 18.2618 | 18.5878 | 18.694  | 18.6323 | 18.7504 |
| OSBPL10 | 19.4596 | 18.9285 | 19.1451 | 19.0544 | 19.0084 | 18.8388 | 19.2627 | 19.1762 | 19.0283 |
| OSBPL3  | 18.2185 | 16.4494 | 17.792  | 18.4502 | 18.1467 | 18.468  | 18.8535 | 18.3231 | 18.9566 |
| OSBPL8  | 18.3906 | 18.4427 | 18.461  | 18.5258 | 18.3851 | 18.102  | 17.936  | 18.5423 | 18.3779 |
| OSBPL9  | 18.1219 | 17.9548 | 18.1207 | 18.0479 | 18.0279 | 17.4359 | 17.3826 | 17.8283 | 17.4245 |
| OTUB1   | 21.9615 | 21.297  | 21.9362 | 21.9396 | 21.8384 | 21.9487 | 22.2409 | 21.8651 | 22.0474 |
| OVCA2   | 19.6064 | 19.498  | 19.894  | 19.4818 | 19.3679 | 19.7472 | 19.6796 | 19.6249 | 19.6245 |
| OXCT1   | 19.5042 | 19.3375 | 19.33   | 19.5413 | 18.7162 | 18.9118 | 18.3844 | 18.9024 | 19.2774 |
| OXSM    | 17.2892 | 17.4364 | 17.1684 | 17.1191 | 17.0904 | 17.0692 | 17.703  | 16.8758 | 17.0563 |
| OXSR1   | 19.9336 | 19.7474 | 19.8083 | 19.8064 | 19.649  | 19.5488 | 19.4876 | 19.6398 | 19.7196 |
| P4HA1   | 21.4207 | 21.214  | 21.1834 | 21.0603 | 20.9935 | 21.2003 | 21.3821 | 21.0124 | 21.2278 |
| P4HA2   | 19.221  | 18.9763 | 18.4092 | 18.8451 | 18.8567 | 19.204  | 19.0891 | 19.0736 | 19.0796 |
| P4HB    | 25.2277 | 24.9415 | 24.9639 | 24.9612 | 24.8154 | 24.9812 | 25.1679 | 25.0034 | 25.0843 |
| PA2G4   | 23.9496 | 24.1756 | 23.8821 | 24.1038 | 23.824  | 23.9323 | 23.9905 | 23.9733 | 24.3573 |
| PABPC1  | 24.1034 | 23.8167 | 24.0218 | 23.8824 | 23.6973 | 23.6813 | 24.2048 | 23.914  | 23.9958 |

|          |         |         |         |         |         |         |         |         |         |
|----------|---------|---------|---------|---------|---------|---------|---------|---------|---------|
| PABPC4   | 22.5004 | 22.3793 | 22.319  | 22.3471 | 22.2155 | 22.2135 | 22.4681 | 22.3018 | 22.4509 |
| PABPN1   | 20.8573 | 20.5708 | 20.5963 | 20.325  | 20.6154 | 20.6611 | 21.0072 | 20.7434 | 20.5912 |
| PACSIN2  | 21.2839 | 20.6976 | 21.179  | 21.3041 | 21.137  | 21.3133 | 21.4726 | 21.182  | 21.5338 |
| PACSIN3  | 20.1077 | 19.6341 | 19.9472 | 19.7355 | 19.8181 | 19.8956 | 20.0222 | 19.7118 | 19.9223 |
| PAF1     | 20.2596 | 20.3645 | 20.0143 | 20.0904 | 20.0503 | 19.8702 | 20.0512 | 19.9192 | 20.2323 |
| PAFAH1B1 | 20.4001 | 21.2785 | 20.7106 | 20.7034 | 20.5229 | 20.6111 | 20.8804 | 20.6697 | 20.9173 |
| PAFAH1B2 | 21.1495 | 20.9264 | 20.947  | 20.8281 | 20.9548 | 21.0313 | 21.2194 | 20.9059 | 20.8396 |
| PAFAH1B3 | 20.77   | 20.0329 | 20.8495 | 20.8347 | 20.8531 | 20.7871 | 21.1224 | 20.6647 | 20.9073 |
| PAICS    | 23.3569 | 23.2065 | 23.1482 | 23.1799 | 22.9688 | 23.2735 | 23.2137 | 23.1803 | 23.299  |
| PAIP1    | 16.7606 | 17.5296 | 17.0909 | 17.1229 | 16.7298 | 15.0836 | 15.1711 | 16.5002 | 16.0195 |
| PAK1     | 18.944  | 19.0163 | 18.9171 | 19.0474 | 18.8104 | 19.2739 | 19.3548 | 19.0884 | 19.0116 |
| PAK2     | 20.5929 | 23.164  | 20.6335 | 20.0288 | 20.1737 | 20.4543 | 20.813  | 20.2667 | 19.9843 |
| PAPOLA   | 19.7437 | 19.9386 | 20.0071 | 20.0287 | 19.6398 | 19.8286 | 20.2701 | 19.8486 | 19.9477 |
| PAPSS1   | 20.8375 | 20.5054 | 20.4056 | 20.4469 | 20.3904 | 20.0999 | 20.5586 | 20.3566 | 20.1814 |
| PAPSS2   | 20.1744 | 20.6188 | 20.633  | 20.4294 | 20.447  | 20.1713 | 20.6499 | 20.2257 | 20.4712 |
| PARK7    | 23.402  | 23.5438 | 23.5679 | 23.6344 | 23.3928 | 23.9029 | 24.0637 | 23.4326 | 23.6388 |
| PARP1    | 21.8833 | 21.6736 | 21.8494 | 21.5857 | 21.5468 | 21.3017 | 21.8441 | 21.6493 | 21.6683 |
| PARVA    | 20.0493 | 19.5397 | 19.9938 | 19.8237 | 19.7637 | 19.8113 | 20.2043 | 19.8993 | 19.9342 |
| PAWR     | 20.9526 | 20.9638 | 20.5763 | 20.8    | 20.8402 | 20.8289 | 20.6812 | 20.6976 | 20.9158 |
| PBDC1    | 20.7009 | 21.0564 | 21.1266 | 20.9986 | 20.8808 | 20.7088 | 21.2176 | 20.8647 | 20.8453 |
| PBK      | 21.1795 | 21.0599 | 20.8506 | 21.0118 | 20.7216 | 20.6436 | 20.5937 | 20.4228 | 20.4875 |
| PBRM1    | 20.2037 | 21.9884 | 20.1302 | 20.0493 | 19.958  | 20.4952 | 20.6744 | 20.4768 | 20.8976 |
| PC       | 20.7636 | 20.5952 | 20.7217 | 20.458  | 20.5537 | 20.564  | 21.1483 | 20.6189 | 20.7539 |
| PCBP1    | 23.2662 | 23.0217 | 22.9818 | 23.0313 | 22.8477 | 23.2781 | 23.3897 | 23.1433 | 23.4193 |
| PCBP2    | 24.0457 | 23.4861 | 23.6492 | 23.6542 | 23.6048 | 23.5037 | 23.8398 | 23.7957 | 23.7056 |
| PCBP3    | 20.2745 | 19.8305 | 19.4062 | 20.1487 | 19.3287 | 20.1038 | 19.3566 | 20.3553 | 20.0813 |
| PCK2     | 19.0103 | 18.8894 | 18.7433 | 18.7025 | 18.5106 | 18.7904 | 19.3545 | 19.0541 | 19.0857 |
| PCMT1    | 19.9446 | 19.8155 | 19.8405 | 20.1959 | 20.0319 | 20.2557 | 20.385  | 19.7442 | 20.1449 |
| PCNA     | 24.1418 | 23.8034 | 24.0307 | 23.9865 | 24.0068 | 24.1339 | 24.5124 | 24.019  | 24.178  |
| PCNP     | 20.4291 | 20.185  | 20.4446 | 20.6079 | 20.1689 | 20.0415 | 20.5564 | 20.0257 | 20.287  |
| PCYOX1   | 19.7507 | 19.3917 | 20.3282 | 20.3029 | 20.3689 | 20.194  | 20.6087 | 20.1873 | 20.3494 |
| PCYT1A   | 20.2024 | 19.7918 | 19.6773 | 19.8588 | 19.5597 | 19.7738 | 19.8825 | 19.7298 | 19.6464 |
| PDAP1    | 19.7885 | 18.4742 | 18.8245 | 19.8632 | 19.1597 | 19.559  | 19.3972 | 19.7405 | 19.8329 |
| PDCD11   | 16.8071 | 17.8078 | 17.9954 | 17.3995 | 17.388  | 17.1505 | 17.8203 | 17.4425 | 17.2217 |
| PDCD6    | 22.0359 | 21.8777 | 21.9361 | 21.6837 | 21.9205 | 21.783  | 22.0693 | 21.8812 | 21.6355 |
| PDCD6IP  | 21.5563 | 21.7731 | 21.8504 | 21.5581 | 21.608  | 21.7549 | 22.1437 | 21.758  | 21.893  |
| PDCL3    | 20.7833 | 20.704  | 20.3632 | 20.6651 | 20.2238 | 20.1182 | 20.1928 | 20.3857 | 20.6139 |
| PDE12    | 20.5465 | 20.3343 | 20.3231 | 20.3247 | 20.1882 | 19.8907 | 19.9447 | 19.9409 | 20.0146 |
| PDE1C    | 20.042  | 19.9732 | 20.1005 | 20.0362 | 19.8796 | 19.6632 | 19.8897 | 19.7643 | 20.018  |
| PDHA1    | 20.4162 | 20.2831 | 20.2145 | 20.164  | 19.9248 | 19.6642 | 19.8938 | 20.0913 | 20.3854 |
| PDHB     | 20.7411 | 20.7525 | 20.7442 | 20.636  | 20.767  | 20.8464 | 21.0234 | 20.7822 | 20.7223 |
| PDIA3    | 24.729  | 24.8065 | 24.6899 | 24.7251 | 24.5958 | 24.7941 | 24.9784 | 24.5469 | 24.9238 |
| PDIA4    | 24.4963 | 24.3745 | 24.4217 | 24.2498 | 24.1905 | 24.4796 | 24.8151 | 24.3837 | 24.5616 |
| PDIA6    | 24.5335 | 24.4937 | 24.1615 | 24.2712 | 24.0952 | 24.0194 | 24.3441 | 24.1501 | 24.4907 |
| PDLIM1   | 20.4749 | 20.2222 | 20.2442 | 20.3529 | 20.0482 | 20.2787 | 20.2691 | 19.8993 | 20.1959 |
| PDLIM4   | 22.1714 | 21.8553 | 22.1341 | 22.1334 | 22.0638 | 22.7964 | 23.1087 | 22.6011 | 22.6682 |
| PDLIM5   | 19.7743 | 19.4015 | 19.5876 | 19.5138 | 19.4524 | 19.3659 | 19.6819 | 19.317  | 19.3469 |
| PDLIM7   | 21.1101 | 21.0288 | 20.8979 | 20.8731 | 20.7246 | 20.9988 | 21.1173 | 20.9087 | 21.043  |
| PDP1     | 14.2055 | 17.3587 | 17.4261 | 17.4259 | 17.1424 | 16.4555 | 16.9422 | 17.1869 | 16.5571 |
| PDS5A    | 20.1325 | 20.007  | 20.005  | 19.8696 | 19.8688 | 19.6002 | 20.1229 | 19.8142 | 19.883  |
| PDS5B    | 18.1911 | 17.7686 | 18.0238 | 17.9225 | 18.16   | 17.7928 | 18.0359 | 18.002  | 17.8503 |
| PDXX     | 19.7928 | 19.0504 | 19.6543 | 19.3971 | 18.9983 | 20.375  | 20.3782 | 20.1061 | 19.824  |
| PDXP     | 18.9619 | 18.6208 | 18.7685 | 18.8977 | 18.5666 | 18.8819 | 18.9391 | 18.6843 | 18.6658 |
| PEA15    | 18.7691 | 18.2223 | 18.309  | 18.4794 | 18.2417 | 18.217  | 17.601  | 18.1867 | 17.9155 |
| PEBP1    | 23.6548 | 23.4821 | 23.2851 | 23.5891 | 23.4276 | 23.8072 | 23.5387 | 23.4454 | 23.3298 |
| PEF1     | 19.2823 | 19.6656 | 19.2592 | 19.4551 | 19.2799 | 18.931  | 18.7305 | 18.8467 | 19.1409 |

|         |         |         |         |         |         |         |         |         |         |
|---------|---------|---------|---------|---------|---------|---------|---------|---------|---------|
| PELO    | 17.8266 | 17.5865 | 17.6848 | 17.7014 | 17.7462 | 18.1084 | 18.1328 | 18.056  | 18.028  |
| PELP1   | 20.2783 | 20.0132 | 19.9855 | 19.9931 | 19.7771 | 19.8027 | 20.0384 | 20.1008 | 19.9372 |
| PEPD    | 20.2315 | 20.2184 | 20.3264 | 20.2499 | 20.0593 | 20.4362 | 20.9825 | 20.5913 | 20.4288 |
| PES1    | 20.4318 | 20.5642 | 20.4628 | 20.3427 | 20.4794 | 20.3555 | 20.6831 | 20.5862 | 20.6308 |
| PEX11B  | 18.0917 | 18.2564 | 18.2073 | 18.2246 | 18.0682 | 17.7741 | 18.5351 | 18.1995 | 18.1135 |
| PFAS    | 21.1721 | 21.2276 | 21.2355 | 21.1382 | 21.18   | 21.4139 | 21.7529 | 21.2331 | 21.4306 |
| PFDN2   | 20.6491 | 20.0906 | 20.4272 | 20.7074 | 20.4302 | 20.7153 | 21.0406 | 20.4509 | 20.8795 |
| PFDN5   | 19.2882 | 19.0192 | 19.2594 | 19.4387 | 18.9984 | 19.1455 | 19.3249 | 18.9835 | 19.3597 |
| PFKL    | 20.4171 | 20.104  | 20.1197 | 20.0477 | 20.0015 | 20.3144 | 20.5385 | 20.3918 | 20.2971 |
| PFKM    | 20.7179 | 20.5526 | 20.9122 | 20.8918 | 20.7088 | 20.8305 | 21.0466 | 20.6979 | 20.8825 |
| PFKP    | 22.5155 | 22.6362 | 22.4976 | 22.4699 | 22.2196 | 22.3963 | 22.1229 | 22.4175 | 22.5505 |
| PFN1    | 26.8142 | 26.9493 | 26.9909 | 26.873  | 26.8294 | 26.967  | 26.806  | 26.8212 | 26.9685 |
| PFN2    | 20.8381 | 19.6724 | 20.9505 | 20.8813 | 20.8037 | 20.9346 | 20.781  | 20.8635 | 21.023  |
| PGAM1   | 24.2244 | 23.8752 | 23.8488 | 23.9749 | 23.7281 | 24.3289 | 24.2885 | 24.0886 | 24.2992 |
| PGAM5   | 20.5957 | 20.3947 | 20.7274 | 20.5743 | 20.6753 | 20.8221 | 21.0255 | 20.755  | 20.7954 |
| PGD     | 23.5643 | 23.6531 | 23.6149 | 23.8028 | 23.5995 | 24.0681 | 24.3493 | 23.8862 | 24.0979 |
| PGK1    | 25.4044 | 24.9942 | 25.1095 | 25.0173 | 25.034  | 25.1814 | 25.3507 | 25.06   | 24.9041 |
| PGLS    | 21.2535 | 21.0567 | 21.0199 | 21.178  | 20.8758 | 21.4943 | 21.647  | 21.1699 | 21.4189 |
| PGM1    | 21.3323 | 21.3314 | 21.2792 | 21.3405 | 21.0354 | 21.3285 | 21.5763 | 21.3641 | 21.3816 |
| PGM2    | 18.646  | 19.4174 | 18.7217 | 18.9605 | 18.0057 | 18.0613 | 18.2301 | 18.4839 | 18.7328 |
| PGM3    | 19.4118 | 19.5452 | 19.4405 | 19.5341 | 19.5018 | 19.6332 | 19.8483 | 19.1413 | 18.9829 |
| PGP     | 19.7838 | 19.9547 | 19.948  | 18.5724 | 20.0724 | 18.8391 | 18.7989 | 20.0836 | 19.6714 |
| PGRMC1  | 19.7825 | 19.5173 | 19.299  | 19.6143 | 19.2089 | 19.1599 | 19.4813 | 19.365  | 19.4908 |
| PGRMC2  | 19.8977 | 20.1695 | 20.0224 | 19.962  | 19.8076 | 20.2316 | 20.3678 | 19.9127 | 20.1802 |
| PHB     | 24.6439 | 24.7737 | 24.5392 | 24.4224 | 24.3378 | 24.6864 | 24.9393 | 24.6344 | 24.7785 |
| PHB2    | 24.5798 | 24.2308 | 24.2486 | 24.3054 | 24.1035 | 24.2083 | 24.4656 | 24.3037 | 24.2728 |
| PHC2    | 19.3101 | 19.021  | 19.0958 | 18.9209 | 18.9711 | 18.8496 | 18.8893 | 18.8123 | 19.1792 |
| PHF5A   | 18.3524 | 18.1277 | 18.7781 | 18.2741 | 17.6314 | 18.878  | 19.2455 | 18.5186 | 18.7474 |
| PHGDH   | 23.798  | 23.513  | 23.6019 | 23.4685 | 23.3884 | 23.7988 | 23.9767 | 23.7234 | 23.8242 |
| PHPT1   | 18.5402 | 18.3057 | 18.8061 | 18.4304 | 18.5703 | 18.6461 | 18.385  | 18.3455 | 18.3303 |
| PI4K2A  | 18.5781 | 18.0977 | 18.1883 | 18.3774 | 18.0673 | 18.3853 | 18.2176 | 18.3589 | 18.5263 |
| PI4KA   | 14.364  | 15.0782 | 15.1354 | 0.91432 | 15.4716 | 5.25395 | 14.0371 | 15.1696 | 14.383  |
| PICALM  | 18.9612 | 19.0891 | 18.8229 | 18.9681 | 18.9288 | 18.5153 | 18.9717 | 19.1384 | 19.2867 |
| PIGK    | 17.3539 | 17.2533 | 16.6497 | 16.8813 | 16.6531 | 16.0306 | 15.9393 | 17.1727 | 17.4052 |
| PIGS    | 17.4192 | 17.5854 | 17.25   | 16.1123 | 16.8119 | 16.3269 | 17.0316 | 16.9498 | 17.4964 |
| PIGT    | 20.0764 | 21.2801 | 20.42   | 20.4879 | 20.517  | 20.6665 | 21.1354 | 20.5531 | 20.7728 |
| PIGU    | 16.0578 | 16.6248 | 16.5282 | 17.2597 | 16.8558 | 13.0724 | 15.0214 | 16.5389 | 16.0611 |
| PIH1D1  | 19.6903 | 19.2751 | 19.2407 | 19.3109 | 19.3713 | 19.6947 | 19.7813 | 19.3992 | 19.5406 |
| PIK3R4  | 17.9526 | 17.3067 | 19.5209 | 17.5999 | 19.6662 | 17.7207 | 20.2265 | 17.6807 | 17.9946 |
| PIN1    | 18.1177 | 18.3595 | 17.9298 | 18.6673 | 17.8158 | 18.3275 | 17.6777 | 18.1626 | 17.9491 |
| PIP4K2B | 17.772  | 18.0803 | 17.9572 | 17.7823 | 17.9995 | 18.4975 | 18.77   | 18.3704 | 18.3013 |
| PIP4K2C | 16.5861 | 16.9981 | 16.9637 | 16.9744 | 17.1094 | 16.7484 | 16.4743 | 16.8095 | 16.4411 |
| PIR     | 19.4671 | 19.9117 | 19.405  | 19.6181 | 19.2741 | 19.0453 | 19.4032 | 19.3436 | 19.3914 |
| PITHD1  | 19.6455 | 19.5772 | 19.5955 | 19.7015 | 19.5263 | 19.959  | 19.5025 | 19.5346 | 19.6327 |
| PITPNA  | 17.2093 | 14.944  | 16.5613 | 16.8962 | 16.099  | 16.5192 | 14.851  | 16.89   | 16.8392 |
| PITPNB  | 21.6487 | 21.5981 | 21.7968 | 21.5135 | 21.4001 | 21.736  | 21.9411 | 21.5592 | 21.5986 |
| PITRM1  | 19.6608 | 19.627  | 19.6745 | 19.5466 | 19.5279 | 19.7218 | 20.212  | 19.8238 | 19.9005 |
| PKM     | 27.4569 | 27.4498 | 27.5579 | 27.3467 | 27.2486 | 27.5632 | 27.8756 | 27.4367 | 27.5778 |
| PKN2    | 18.6399 | 18.4908 | 18.3021 | 18.653  | 18.2309 | 17.6857 | 17.5131 | 17.7577 | 17.854  |
| PLA2G15 | 14.2728 | 15.0083 | 14.8362 | 15.0079 | 14.5808 | 12.8962 | 10.9702 | 13.934  | 12.4547 |
| PLA2G4A | 16.0505 | 15.8138 | 15.9021 | 15.0633 | 15.3811 | 14.0955 | 14.9747 | 15.7831 | 14.9458 |
| PLAA    | 19.6927 | 19.5979 | 19.5802 | 19.721  | 19.4004 | 19.5392 | 19.572  | 19.4682 | 19.6307 |
| PLAT    | 18.201  | 17.6408 | 17.6955 | 17.6238 | 17.2827 | 18.4915 | 18.7163 | 18.6112 | 18.4618 |
| PLCB3   | 17.5516 | 17.2246 | 17.584  | 17.2203 | 17.1691 | 17.5437 | 17.0423 | 17.4173 | 17.4407 |
| PLCG1   | 21.0007 | 20.6447 | 20.7268 | 20.4174 | 20.4167 | 20.6451 | 20.8591 | 20.1627 | 20.324  |
| PLCH1   | 21.1971 | 21.7391 | 21.3014 | 21.2745 | 20.9503 | 20.3015 | 20.201  | 21.182  | 21.3971 |

|         |         |         |         |         |         |         |         |         |         |
|---------|---------|---------|---------|---------|---------|---------|---------|---------|---------|
| PLD3    | 19.2466 | 18.8534 | 18.9116 | 18.8084 | 18.8037 | 18.4103 | 18.7949 | 18.9138 | 18.9789 |
| PLEC    | 23.5363 | 23.3649 | 23.2397 | 23.2925 | 23.2024 | 23.125  | 23.2977 | 23.1938 | 23.3365 |
| PLIN3   | 21.7602 | 21.5065 | 21.5992 | 21.5025 | 21.3085 | 21.5733 | 21.6299 | 21.4091 | 21.763  |
| PLK1    | 18.0667 | 18.7474 | 18.6428 | 18.4771 | 18.4299 | 18.7307 | 18.9729 | 18.7319 | 18.6718 |
| PLOD1   | 20.0742 | 19.8766 | 20.062  | 19.8922 | 20.0019 | 19.7313 | 20.1222 | 19.8198 | 19.8229 |
| PLOD2   | 19.2874 | 19.3384 | 19.4219 | 18.97   | 19.1876 | 18.9514 | 19.4298 | 19.1896 | 19.0846 |
| PLOD3   | 21.5153 | 21.4962 | 21.5361 | 21.3361 | 21.2161 | 21.0679 | 21.4281 | 21.1724 | 21.3492 |
| PLP2    | 20.2289 | 19.9941 | 20.1486 | 19.9352 | 20.029  | 20.4243 | 20.6724 | 20.3838 | 20.4887 |
| PLRG1   | 20.4171 | 20.4518 | 20.2519 | 20.374  | 20.1555 | 19.8229 | 20.4093 | 20.0569 | 20.1448 |
| PLS1    | 19.0393 | 18.4079 | 17.9371 | 17.7273 | 17.6312 | 17.6368 | 18.187  | 18.135  | 18.2496 |
| PLS3    | 19.8136 | 19.6454 | 19.9696 | 19.5313 | 19.5227 | 19.5403 | 19.8851 | 19.3946 | 19.6155 |
| PLXNB2  | 17.2003 | 17.1833 | 17.3428 | 16.9756 | 17.0399 | 17.0012 | 17.358  | 17.2836 | 16.9969 |
| PML     | 19.5237 | 19.3972 | 19.4643 | 19.2609 | 19.1088 | 19.7398 | 19.6459 | 19.8014 | 19.8238 |
| PMM2    | 19.2854 | 19.3795 | 18.8343 | 19.0429 | 19.1405 | 19.4386 | 19.6091 | 19.1151 | 19.4652 |
| PMPCA   | 19.6767 | 19.6254 | 19.6267 | 19.5179 | 19.4924 | 19.1687 | 19.3212 | 19.3554 | 19.4675 |
| PMPCB   | 19.9277 | 19.781  | 19.9387 | 19.8446 | 19.8641 | 19.8416 | 20.6661 | 19.7304 | 20.1115 |
| PMVK    | 18.4792 | 18.9447 | 19.2024 | 18.5858 | 18.7551 | 18.6489 | 18.8555 | 18.618  | 18.5198 |
| PNN     | 21.2487 | 21.0178 | 20.9137 | 21.0751 | 20.9595 | 21.0327 | 21.431  | 21.0021 | 21.1941 |
| PNO1    | 18.2318 | 18.9683 | 18.3034 | 18.808  | 18.9466 | 19.1353 | 18.356  | 18.8009 | 18.008  |
| PNP     | 18.1697 | 17.811  | 17.9782 | 18.0241 | 17.8883 | 18.0952 | 17.869  | 18.081  | 17.7585 |
| PNPO    | 20.3653 | 20.5125 | 20.5414 | 20.4392 | 20.2767 | 20.3867 | 20.4509 | 20.3335 | 20.4867 |
| PNPT1   | 20.8798 | 21.2468 | 20.9907 | 20.9897 | 20.9779 | 20.8592 | 21.5583 | 20.9179 | 21.2183 |
| PODXL   | 21.1986 | 21.6839 | 21.412  | 21.3986 | 21.3025 | 21.8058 | 21.8516 | 21.8945 | 22.2879 |
| POFUT1  | 21.5369 | 21.1483 | 21.3136 | 21.0519 | 21.0299 | 21.3118 | 21.1418 | 21.069  | 21.2446 |
| POGZ    | 17.741  | 18.5034 | 18.5253 | 18.3169 | 18.5602 | 18.3253 | 18.5659 | 18.5351 | 18.3196 |
| POLA2   | 19.8422 | 19.5098 | 19.565  | 19.3991 | 19.5416 | 19.4611 | 19.5505 | 19.2712 | 19.2335 |
| POLD1   | 20.0606 | 22.5496 | 20.6388 | 20.7699 | 20.4935 | 20.1521 | 20.4892 | 20.1035 | 20.3646 |
| POLD2   | 18.1404 | 17.347  | 18.1472 | 18.2553 | 18.3211 | 18.4856 | 18.5115 | 17.5449 | 18.3397 |
| POLDIP2 | 19.8384 | 20.2474 | 19.8637 | 19.727  | 19.7593 | 20.0345 | 20.4731 | 19.9891 | 20.0254 |
| POLDIP3 | 19.8189 | 19.6215 | 19.8776 | 19.7315 | 19.666  | 19.4805 | 19.8091 | 19.6805 | 19.6535 |
| POLR1A  | 20.2429 | 19.8286 | 19.7733 | 19.9751 | 19.679  | 19.8231 | 19.8616 | 19.9174 | 19.9138 |
| POLR1B  | 16.9721 | 16.8891 | 16.6258 | 17.2939 | 16.6563 | 14.3149 | 15.5599 | 16.7385 | 16.66   |
| POLR1C  | 19.9818 | 19.5843 | 19.7275 | 19.6146 | 19.4294 | 19.7838 | 19.9114 | 19.6956 | 19.887  |
| POLR2A  | 19.7015 | 19.6531 | 19.8859 | 19.6204 | 19.5115 | 19.7645 | 19.9519 | 19.7825 | 19.9024 |
| POLR2B  | 20.4329 | 20.3461 | 20.4557 | 20.2874 | 20.2862 | 20.2293 | 20.7705 | 20.3749 | 20.5298 |
| POLR2C  | 18.3993 | 18.1608 | 18.505  | 18.3649 | 18.3218 | 18.0684 | 18.9824 | 18.475  | 18.3433 |
| POLR2E  | 19.5634 | 19.7705 | 19.7521 | 19.7878 | 19.5276 | 19.8178 | 19.8598 | 19.7609 | 19.7554 |
| POLR2G  | 19.8011 | 19.5825 | 19.6266 | 19.5925 | 19.2752 | 19.5274 | 19.7472 | 19.5176 | 19.8494 |
| POLR2H  | 20.9299 | 21.3619 | 20.551  | 20.6717 | 20.7259 | 20.9382 | 20.9598 | 20.6215 | 21.0592 |
| POLR3C  | 19.1118 | 19.1015 | 18.8278 | 19.1486 | 19.1539 | 18.947  | 19.0578 | 18.7849 | 18.8263 |
| POLR3F  | 19.2633 | 19.4146 | 19.4175 | 19.279  | 19.0871 | 19.2872 | 19.3905 | 19.3174 | 19.4399 |
| PON2    | 19.7991 | 20.1428 | 20.0808 | 20.124  | 19.8864 | 20.1918 | 20.1883 | 20.2043 | 20.1451 |
| POR     | 21.2053 | 21.1123 | 20.9358 | 20.9281 | 20.7445 | 21.116  | 21.5173 | 21.1418 | 21.4624 |
| PPA1    | 23.0337 | 22.6036 | 22.8616 | 22.4966 | 22.565  | 22.996  | 23.0742 | 22.9518 | 22.6723 |
| PPA2    | 17.1101 | 17.3254 | 17.2488 | 16.7707 | 17.454  | 17.5712 | 17.0782 | 17.6684 | 16.7096 |
| PPAN    | 18.0559 | 18.0763 | 18.2763 | 17.9011 | 17.8338 | 18.1641 | 18.4445 | 18.0542 | 17.7317 |
| PPAT    | 20.0423 | 19.7559 | 19.6778 | 19.6949 | 19.5583 | 19.7811 | 20.1721 | 19.841  | 20.0188 |
| PPFIA1  | 17.1002 | 17.0201 | 17.0885 | 17.2771 | 17.2348 | 17.3019 | 17.8644 | 17.527  | 17.3913 |
| PPFIBP1 | 18.3532 | 18.1189 | 18.5803 | 18.2337 | 18.0476 | 18.5266 | 18.4728 | 18.2721 | 18.3853 |
| PPIA    | 26.5591 | 26.5669 | 26.5303 | 26.6633 | 26.313  | 26.9888 | 27.0723 | 26.7636 | 27.0088 |
| PPIB    | 25.5983 | 25.539  | 25.6267 | 25.3322 | 25.2635 | 25.2521 | 25.7096 | 25.3592 | 25.5951 |
| PPIC    | 19.9747 | 19.897  | 20.1439 | 19.8945 | 19.7557 | 19.6507 | 20.0394 | 19.8007 | 19.9072 |
| PPID    | 19.9857 | 20.2862 | 19.9204 | 20.2734 | 19.9555 | 19.636  | 19.6744 | 19.6604 | 19.9134 |
| PPIE    | 19.6219 | 19.4775 | 19.3822 | 19.3572 | 19.6167 | 20.0033 | 19.6869 | 19.4558 | 19.552  |
| PPIF    | 21.6257 | 21.6885 | 21.4161 | 21.4945 | 21.4749 | 21.9017 | 22.2683 | 21.671  | 21.832  |
| PPIG    | 20.2508 | 20.1378 | 19.6829 | 19.3278 | 19.1585 | 19.9081 | 19.595  | 19.7678 | 19.6872 |

|          |         |         |         |         |         |         |         |         |         |
|----------|---------|---------|---------|---------|---------|---------|---------|---------|---------|
| PPIH     | 19.1688 | 19.3635 | 19.0465 | 19.3098 | 19.192  | 19.6957 | 19.7063 | 19.0522 | 19.624  |
| PPIL2    | 18.4866 | 18.017  | 17.8852 | 18.356  | 18.0882 | 18.0238 | 18.0375 | 18.1511 | 18.3819 |
| PPIL3    | 18.3889 | 18.7119 | 18.8396 | 18.8728 | 18.5984 | 18.8414 | 18.5147 | 18.3756 | 18.8845 |
| PPIL4    | 19.1292 | 18.9855 | 19.0294 | 19.2    | 19.0723 | 18.6685 | 18.8806 | 19.0231 | 18.7223 |
| PPM1A    | 19.7114 | 19.1271 | 18.8163 | 19.427  | 18.8992 | 19.4232 | 19.5566 | 19.4943 | 19.4095 |
| PPM1F    | 20.9277 | 20.7806 | 20.9037 | 20.7921 | 20.7246 | 20.6423 | 21.0316 | 20.8305 | 20.6765 |
| PPM1G    | 21.9391 | 21.8454 | 21.7806 | 21.7563 | 21.6041 | 21.665  | 21.8555 | 21.559  | 21.8253 |
| PPME1    | 20.7717 | 20.3781 | 20.7003 | 20.3638 | 20.3709 | 20.7526 | 20.834  | 20.5115 | 20.4999 |
| PPOX     | 17.0991 | 17.5524 | 17.6606 | 17.0672 | 17.2651 | 16.6939 | 17.3314 | 17.1442 | 17.1092 |
| PPP1CA   | 20.9414 | 20.7463 | 20.6157 | 20.7196 | 20.5487 | 20.5889 | 20.2652 | 20.6214 | 20.9045 |
| PPP1CB   | 21.7495 | 20.9324 | 21.6979 | 21.4044 | 21.3225 | 21.5396 | 21.7308 | 21.5185 | 21.5018 |
| PPP1CC   | 19.123  | 15.5949 | 18.7089 | 18.9947 | 19.0439 | 19.2653 | 19.5983 | 18.8294 | 19.1038 |
| PPP1R10  | 18.1673 | 18.4371 | 18.3386 | 18.37   | 18.0103 | 18.0213 | 18.4224 | 18.231  | 18.3679 |
| PPP1R12A | 18.7167 | 18.8082 | 19.0767 | 18.4111 | 18.9497 | 18.7951 | 19.2164 | 18.536  | 18.8951 |
| PPP1R14B | 19.1346 | 18.7497 | 18.8097 | 19.0843 | 18.8109 | 19.3471 | 19.0625 | 18.5925 | 18.908  |
| PPP1R18  | 17.338  | 17.0301 | 17.4303 | 17.4537 | 17.1665 | 17.6056 | 17.6233 | 16.761  | 17.2351 |
| PPP1R7   | 19.5345 | 19.6158 | 19.9787 | 19.3774 | 19.5991 | 19.7143 | 20.1991 | 19.6342 | 19.7202 |
| PPP1R8   | 19.8365 | 19.5138 | 19.4627 | 19.6711 | 19.3067 | 19.5475 | 19.7767 | 19.4341 | 19.576  |
| PPP1R9B  | 18.2379 | 17.7977 | 17.8909 | 17.9014 | 17.7818 | 17.3917 | 19.0673 | 17.733  | 17.777  |
| PPP2CA   | 20.3123 | 20.1872 | 19.9744 | 20.1478 | 19.8282 | 20.2414 | 20.0973 | 20.3297 | 20.1826 |
| PPP2CB   | 17.0887 | 18.1452 | 17.1685 | 17.3503 | 16.7025 | 16.886  | 16.9397 | 16.9308 | 16.6476 |
| PPP2R1A  | 22.5422 | 22.9392 | 22.7142 | 22.4105 | 22.1061 | 22.1908 | 23.0503 | 21.9465 | 22.3328 |
| PPP2R2A  | 20.1027 | 19.441  | 20.2814 | 20.3124 | 20.141  | 19.8737 | 20.4287 | 20.189  | 20.2254 |
| PPP2R4   | 21.1658 | 20.4214 | 20.5915 | 20.4475 | 20.4097 | 20.3947 | 20.7883 | 20.5977 | 20.6258 |
| PPP2R5C  | 18.4832 | 18.352  | 18.2246 | 18.2095 | 17.8318 | 18.0144 | 18.4843 | 18.2039 | 18.2996 |
| PPP2R5D  | 17.5512 | 17.6105 | 17.8677 | 17.5952 | 17.5934 | 17.0029 | 17.5344 | 17.5126 | 17.387  |
| PPP2R5E  | 16.5681 | 17.2114 | 16.7635 | 16.8721 | 16.9852 | 16.4414 | 16.3979 | 16.7041 | 16.2491 |
| PPP3CA   | 20.2861 | 19.47   | 19.6748 | 20.0566 | 19.5759 | 19.5667 | 19.6623 | 19.5098 | 19.7975 |
| PPP4C    | 20.6676 | 20.1449 | 20.1608 | 20.1325 | 20.1702 | 19.8058 | 19.8704 | 20.1727 | 20.1212 |
| PPP4R1   | 15.5231 | 15.3199 | 15.9009 | 16.0206 | 15.1452 | 14.899  | 15.375  | 15.5956 | 15.3453 |
| PPP4R2   | 18.9862 | 18.919  | 18.7334 | 18.8817 | 18.9629 | 18.6875 | 19.0445 | 18.6652 | 18.9189 |
| PPP5C    | 20.5549 | 20.4275 | 20.2192 | 20.4426 | 20.1358 | 19.9146 | 19.8342 | 20.1356 | 20.3359 |
| PPP6C    | 20.0173 | 20.1168 | 20.2367 | 20.0519 | 20.0968 | 20.3659 | 20.758  | 20.2305 | 20.3629 |
| PPP6R3   | 19.3468 | 19.475  | 19.2781 | 19.4034 | 19.19   | 18.7795 | 18.6949 | 19.3737 | 19.5269 |
| PPT1     | 20.8474 | 20.262  | 20.889  | 20.8658 | 20.6678 | 20.8442 | 20.8106 | 20.9013 | 20.9918 |
| PPT2     | 20.0709 | 19.8008 | 19.9923 | 19.6294 | 19.5731 | 19.4788 | 19.7085 | 19.8648 | 19.7228 |
| PQBP1    | 20.3106 | 19.845  | 19.835  | 20.1177 | 19.7424 | 20.4607 | 20.5361 | 20.088  | 20.2832 |
| PRAF2    | 20.5    | 19.4085 | 19.853  | 18.8826 | 19.6567 | 19.6367 | 19.5269 | 19.7424 | 19.9427 |
| PRC1     | 16.777  | 17.0438 | 16.7813 | 16.5657 | 17.0346 | 15.9066 | 16.619  | 17.2287 | 17.1969 |
| PRCC     | 16.2919 | 16.2298 | 17.7681 | 17.1886 | 17.0367 | 17.6448 | 16.8418 | 16.9903 | 17.031  |
| PRDX1    | 25.9539 | 26.0246 | 25.9384 | 25.9546 | 25.7724 | 26.1256 | 26.1593 | 25.9798 | 25.9879 |
| PRDX2    | 22.9452 | 23.0128 | 22.9737 | 22.7866 | 22.8356 | 23.1516 | 23.475  | 22.9942 | 23.1161 |
| PRDX3    | 22.3918 | 22.4868 | 22.2926 | 22.274  | 22.2869 | 22.3618 | 22.4709 | 22.1967 | 22.3624 |
| PRDX4    | 21.744  | 21.3979 | 21.6997 | 21.546  | 21.5218 | 21.7809 | 22.0234 | 21.698  | 22.0004 |
| PRDX5    | 23.5797 | 23.5034 | 23.5218 | 23.6311 | 23.461  | 23.4838 | 23.6848 | 23.3713 | 23.547  |
| PRDX6    | 24.7884 | 24.7948 | 24.6302 | 24.6927 | 24.5938 | 24.7765 | 24.9466 | 24.7509 | 24.8325 |
| PREB     | 17.008  | 17.153  | 17.4112 | 17.6968 | 17.487  | 17.8985 | 17.8872 | 17.5187 | 17.391  |
| PREP     | 20.1164 | 20.4287 | 20.6567 | 21.4405 | 20.5777 | 19.6023 | 20.0576 | 20.1007 | 20.0901 |
| PREPL    | 17.2023 | 17.0944 | 16.7159 | 16.7706 | 16.9238 | 16.7211 | 17.0351 | 17.19   | 16.5744 |
| PREX1    | 15.5829 | 14.1587 | 16.4192 | 16.3606 | 16.5767 | 15.4603 | 15.4163 | 15.5864 | 14.9202 |
| PRIM1    | 18.284  | 17.5301 | 17.7889 | 17.0346 | 17.7896 | 17.8544 | 17.9061 | 17.7105 | 17.6903 |
| PRIM2    | 16.7885 | 16.908  | 16.8293 | 16.687  | 16.7076 | 16.3663 | 16.5209 | 16.6814 | 16.5759 |
| PRKAA1   | 18.8019 | 19.1206 | 19.2443 | 18.9191 | 19.1687 | 19.2533 | 19.3286 | 19.1088 | 18.9457 |
| PRKACA   | 19.5733 | 19.438  | 19.2743 | 19.4382 | 19.2071 | 19.2817 | 18.6418 | 19.122  | 19.1226 |
| PRKAG1   | 19.3558 | 19.2608 | 19.3011 | 19.0801 | 19.0708 | 18.9065 | 19.0454 | 18.9209 | 18.8637 |
| PRKAR1A  | 21.1657 | 21.0836 | 20.9735 | 21.0402 | 20.7792 | 21.1901 | 20.8792 | 20.9987 | 21.0492 |

|         |         |         |         |         |         |         |         |         |         |
|---------|---------|---------|---------|---------|---------|---------|---------|---------|---------|
| PRKAR2A | 20.5439 | 21.7747 | 20.5872 | 20.8177 | 20.7332 | 20.767  | 20.8948 | 20.605  | 20.8333 |
| PRKCD   | 20.4091 | 20.1633 | 19.9366 | 20.0532 | 19.689  | 19.8181 | 20.0934 | 19.9075 | 19.9193 |
| PRKCDBP | 20.0108 | 19.4914 | 19.7737 | 19.6163 | 19.3296 | 19.4937 | 19.5983 | 19.436  | 19.5474 |
| PRKCI   | 17.8435 | 17.3014 | 17.4322 | 17.5255 | 17.0263 | 16.4086 | 17.1412 | 16.9431 | 17.1565 |
| PRKCSH  | 23.5098 | 23.7522 | 23.5993 | 23.8112 | 23.4458 | 23.426  | 23.4026 | 23.4277 | 23.8569 |
| PRKD1   | 16.8734 | 16.7271 | 16.4791 | 16.4573 | 16.3878 | 17.1087 | 15.9055 | 16.341  | 16.1184 |
| PRKDC   | 22.5711 | 22.3246 | 22.1716 | 22.2153 | 22.1475 | 22.0827 | 22.3964 | 22.1922 | 22.2804 |
| PRKRA   | 16.9695 | 16.8557 | 17.8918 | 17.5064 | 17.7649 | 16.8095 | 16.7014 | 17.0725 | 16.939  |
| PRMT1   | 22.9208 | 22.8872 | 22.7437 | 22.7967 | 22.7021 | 22.7314 | 22.9543 | 22.662  | 22.8438 |
| PRMT3   | 17.5716 | 17.5161 | 18.3154 | 17.9791 | 17.2808 | 16.4564 | 17.2655 | 17.2994 | 17.2179 |
| PRMT5   | 21.2127 | 21.0231 | 20.7895 | 21.1046 | 20.9602 | 20.8802 | 20.9143 | 20.8719 | 21.0596 |
| PROCR   | 20.5883 | 20.538  | 20.5304 | 20.4141 | 20.4532 | 20.585  | 20.8553 | 20.8288 | 20.7911 |
| PRPF19  | 23.3727 | 23.3073 | 23.4953 | 23.281  | 23.1797 | 23.3176 | 23.4163 | 23.1213 | 23.2898 |
| PRPF31  | 20.2073 | 19.8709 | 19.708  | 19.7896 | 19.7313 | 19.5697 | 19.3082 | 19.6285 | 19.6118 |
| PRPF38A | 20.4003 | 20.2249 | 20.0563 | 20.083  | 20.0176 | 20.0511 | 20.3212 | 19.8845 | 20.155  |
| PRPF38B | 17.9646 | 18.0768 | 17.6606 | 17.7857 | 18.1004 | 16.5604 | 17.4515 | 18.0168 | 17.7362 |
| PRPF4   | 20.9949 | 20.4997 | 20.5855 | 20.4122 | 20.4519 | 20.4771 | 20.5996 | 20.5779 | 20.2539 |
| PRPF40A | 20.4054 | 20.2281 | 20.4671 | 20.2083 | 20.173  | 20.4566 | 21.092  | 20.5338 | 20.52   |
| PRPF4B  | 16.9696 | 16.9997 | 16.9108 | 17.0592 | 16.7688 | 17.8886 | 18.1821 | 17.8255 | 19.6919 |
| PRPF6   | 21.5579 | 21.4553 | 21.3891 | 21.4328 | 21.2121 | 21.6704 | 21.654  | 21.4058 | 21.6468 |
| PRPF8   | 24.3646 | 24.5135 | 24.2745 | 23.7081 | 24.3887 | 23.8851 | 23.6527 | 23.8945 | 24.0339 |
| PRPS1   | 21.0976 | 20.8352 | 20.7644 | 20.7125 | 20.7378 | 20.7546 | 21.0202 | 20.7373 | 20.4573 |
| PRPS2   | 20.2717 | 20.0473 | 20.066  | 19.9058 | 19.9174 | 20.0516 | 20.2354 | 20.0529 | 19.6122 |
| PRPSAP1 | 20.128  | 20.0235 | 19.7481 | 20.1046 | 19.9048 | 19.7981 | 19.9669 | 19.6064 | 19.7565 |
| PRPSAP2 | 17.7975 | 17.5533 | 17.5289 | 17.5904 | 17.5515 | 16.2875 | 17.5977 | 17.7317 | 17.2856 |
| PRRC1   | 20.0243 | 19.6048 | 19.7267 | 19.7869 | 19.7005 | 19.7522 | 19.905  | 19.8638 | 19.7675 |
| PRRC2A  | 18.3235 | 18.0512 | 17.9355 | 17.9789 | 17.8142 | 18.1555 | 18.1938 | 18.0784 | 18.2666 |
| PRRC2C  | 21.1707 | 21.2677 | 21.1929 | 20.408  | 21.1276 | 21.0785 | 21.5441 | 20.711  | 21.2192 |
| PRTFDC1 | 18.8595 | 16.8855 | 17.4129 | 16.5005 | 17.1164 | 18.2259 | 16.9182 | 16.8741 | 16.4062 |
| PSAP    | 20.8979 | 20.8769 | 20.7419 | 20.9481 | 20.7102 | 20.9993 | 21.2131 | 20.9652 | 21.3492 |
| PSAT1   | 22.3125 | 22.1063 | 22.3909 | 22.3994 | 22.2169 | 22.5791 | 22.865  | 22.4649 | 22.753  |
| PSIP1   | 20.064  | 19.9934 | 19.8596 | 19.961  | 19.9392 | 20.1471 | 19.9942 | 19.8536 | 19.6947 |
| PSMA1   | 23.3553 | 22.7512 | 23.2228 | 23.2159 | 23.0744 | 23.3974 | 23.5127 | 23.3114 | 23.4177 |
| PSMA2   | 21.7308 | 21.8054 | 21.6662 | 21.8403 | 21.6324 | 21.9447 | 21.1047 | 21.5502 | 21.6852 |
| PSMA3   | 21.5581 | 20.4765 | 21.5769 | 21.4229 | 21.5067 | 21.6477 | 21.7826 | 21.5474 | 21.5451 |
| PSMA4   | 22.2416 | 22.4118 | 22.6201 | 22.4925 | 22.3575 | 22.6485 | 22.9551 | 22.2884 | 22.4163 |
| PSMA5   | 22.7753 | 22.6512 | 22.7736 | 22.6367 | 22.5221 | 22.9468 | 22.8541 | 22.8587 | 22.92   |
| PSMA6   | 23.3028 | 22.7641 | 23.2085 | 23.2314 | 23.1529 | 23.406  | 23.7748 | 23.2794 | 23.428  |
| PSMA7   | 23.6228 | 23.1652 | 23.9153 | 23.8268 | 23.7507 | 23.8764 | 24.1485 | 23.783  | 23.9313 |
| PSMB1   | 23.7384 | 23.5919 | 23.564  | 23.4585 | 23.3609 | 23.6219 | 23.7403 | 23.5979 | 23.7224 |
| PSMB2   | 22.253  | 21.5036 | 21.9295 | 21.9965 | 21.8756 | 21.2516 | 22.2807 | 21.7245 | 21.9764 |
| PSMB3   | 21.7295 | 21.5166 | 21.3532 | 21.655  | 21.3684 | 21.2664 | 21.3936 | 21.4978 | 21.4148 |
| PSMB4   | 22.2769 | 21.0014 | 21.9367 | 22.1865 | 21.8021 | 22.424  | 22.3791 | 22.112  | 22.5066 |
| PSMB5   | 22.5169 | 22.6041 | 22.4523 | 22.4547 | 22.3373 | 22.4943 | 22.7757 | 22.4296 | 22.5817 |
| PSMB6   | 21.9099 | 21.4729 | 21.8601 | 22.0657 | 21.8112 | 22.153  | 22.1754 | 21.928  | 22.2603 |
| PSMB7   | 22.2662 | 22.2894 | 22.11   | 22.09   | 21.8744 | 22.3386 | 22.4706 | 22.0871 | 22.373  |
| PSMB8   | 19.8676 | 20.1144 | 20.0819 | 20.0397 | 19.9797 | 20.005  | 20.5537 | 20.2881 | 20.2949 |
| PSMB9   | 20.0675 | 20.2444 | 20.1391 | 19.9203 | 19.9634 | 19.9087 | 20.5165 | 20.2029 | 20.0336 |
| PSMC1   | 22.5892 | 21.9844 | 22.4745 | 22.5332 | 22.3714 | 22.5727 | 22.7254 | 22.5536 | 22.503  |
| PSMC2   | 22.9502 | 23.0237 | 22.9088 | 22.7182 | 22.6168 | 22.9894 | 23.1926 | 22.6971 | 22.8445 |
| PSMC3   | 22.5252 | 22.5521 | 22.5376 | 22.4743 | 22.0071 | 22.4875 | 22.1973 | 22.3663 | 22.5659 |
| PSMC4   | 22.4844 | 22.3512 | 22.5689 | 22.2772 | 22.1826 | 22.5029 | 22.6825 | 22.3755 | 22.4001 |
| PSMC5   | 22.131  | 22.087  | 22.0151 | 22.0097 | 21.7558 | 21.911  | 21.8805 | 21.919  | 21.9965 |
| PSMC6   | 22.376  | 22.2491 | 22.3356 | 22.4718 | 22.3811 | 22.5109 | 22.8683 | 22.4056 | 22.6353 |
| PSMD1   | 22.9266 | 22.6441 | 22.9313 | 22.6425 | 22.5629 | 22.7415 | 22.901  | 22.7025 | 22.7143 |
| PSMD10  | 19.3908 | 18.9843 | 18.5142 | 19.6349 | 18.4795 | 18.2873 | 18.3547 | 18.09   | 18.6107 |

|         |         |         |         |         |         |         |         |         |         |
|---------|---------|---------|---------|---------|---------|---------|---------|---------|---------|
| PSMD11  | 22.1221 | 21.4221 | 22.2125 | 22.0683 | 21.8411 | 22.0987 | 22.336  | 22.0469 | 22.242  |
| PSMD12  | 21.7863 | 21.3535 | 21.6997 | 21.7663 | 21.5826 | 21.3045 | 21.8072 | 21.7543 | 21.8976 |
| PSMD13  | 22.6625 | 22.2452 | 22.9965 | 22.6956 | 22.827  | 22.6275 | 23.0847 | 22.8687 | 22.7216 |
| PSMD14  | 22.7378 | 22.7363 | 22.6046 | 22.5485 | 22.4301 | 22.6009 | 22.7977 | 22.4255 | 22.7309 |
| PSMD2   | 22.5599 | 22.2947 | 22.5013 | 22.3093 | 22.2907 | 22.0946 | 22.6347 | 22.4572 | 22.479  |
| PSMD3   | 22.0087 | 21.9598 | 22.1371 | 21.9201 | 21.8047 | 21.8188 | 22.2974 | 21.8543 | 22.1539 |
| PSMD4   | 21.9706 | 21.7259 | 22.0068 | 21.9254 | 21.8546 | 21.9915 | 22.3568 | 21.9451 | 21.9899 |
| PSMD5   | 20.3922 | 20.4249 | 20.2496 | 20.0869 | 19.9926 | 20.2827 | 20.5607 | 20.1671 | 20.5037 |
| PSMD6   | 22.0916 | 22.0811 | 22.209  | 22.0191 | 21.7815 | 21.9074 | 22.0457 | 21.942  | 22.1174 |
| PSMD7   | 21.9369 | 21.4001 | 21.6516 | 21.5545 | 21.6229 | 21.6926 | 21.8042 | 21.7127 | 21.6322 |
| PSMD8   | 22.0506 | 21.7773 | 22.1536 | 22.1768 | 22.1074 | 22.4769 | 22.696  | 22.1823 | 22.4138 |
| PSMD9   | 18.9574 | 19.138  | 19.7387 | 19.8504 | 20.0097 | 20.1875 | 20.3225 | 19.6698 | 20.0463 |
| PSME1   | 22.0954 | 22.0543 | 22.1835 | 22.1184 | 21.9827 | 22.3937 | 22.5716 | 22.2013 | 22.4274 |
| PSME2   | 21.3454 | 21.2521 | 21.5655 | 21.3249 | 21.2897 | 20.647  | 21.4372 | 21.3809 | 21.4814 |
| PSME3   | 22.3418 | 22.321  | 22.6974 | 22.2433 | 22.3359 | 22.392  | 22.844  | 22.4021 | 22.557  |
| PSME4   | 18.0483 | 18.0864 | 18.1495 | 17.951  | 18.0547 | 17.3345 | 18.276  | 18.1254 | 17.9777 |
| PSMF1   | 19.9867 | 19.9815 | 19.8687 | 19.8136 | 19.6361 | 20.115  | 20.1642 | 19.9829 | 20.0233 |
| PSMG1   | 18.5847 | 19.3277 | 19.2514 | 18.9902 | 19.2832 | 18.7644 | 19.3733 | 19.1782 | 19.1694 |
| PSMG2   | 18.46   | 20.7909 | 20.9722 | 21.6322 | 21.5872 | 21.2884 | 21.5016 | 20.3663 | 21.0452 |
| PSMG3   | 16.6578 | 17.1485 | 17.9546 | 17.4765 | 17.4295 | 17.5623 | 17.1665 | 17.318  | 16.7173 |
| PSPC1   | 22.0885 | 21.9521 | 22.078  | 21.7371 | 21.673  | 21.8349 | 21.992  | 21.8016 | 21.7686 |
| PSPH    | 20.9921 | 20.6744 | 20.8661 | 20.919  | 20.6549 | 20.8028 | 20.7998 | 20.7831 | 20.7641 |
| PTBP1   | 23.4376 | 23.1055 | 23.4188 | 23.3632 | 23.5439 | 23.8056 | 23.7953 | 23.3887 | 23.1556 |
| PTBP2   | 17.9437 | 17.7334 | 17.8501 | 17.5045 | 17.5809 | 17.5177 | 18.0905 | 17.7149 | 18.1058 |
| PTCD1   | 16.7585 | 17.3521 | 17.4423 | 17.388  | 17.114  | 16.9591 | 17.3269 | 17.4036 | 17.0488 |
| PTCD3   | 19.2118 | 20.5768 | 19.1389 | 19.0832 | 19.0427 | 18.9416 | 19.5821 | 19.2856 | 19.3743 |
| PTDSS1  | 18.0207 | 17.9034 | 17.621  | 17.6524 | 18.1553 | 17.374  | 17.9727 | 17.8528 | 17.8296 |
| PTGES2  | 19.4617 | 19.1099 | 19.0857 | 19.0245 | 19.0805 | 18.6747 | 19.3088 | 19.4254 | 19.0579 |
| PTGES3  | 22.8877 | 22.7183 | 22.9638 | 23.0515 | 22.8184 | 22.9682 | 23.3244 | 23.0115 | 23.2918 |
| PTGFRN  | 19.9997 | 20.3857 | 20.1178 | 20.1373 | 20.2412 | 20.1565 | 20.7328 | 20.4757 | 20.6287 |
| PTGR1   | 17.4585 | 17.1752 | 17.2947 | 17.1701 | 17.5873 | 17.4435 | 17.7081 | 17.6315 | 16.6046 |
| PTK2    | 17.8457 | 17.7536 | 17.5715 | 17.3655 | 17.5369 | 17.4789 | 17.8968 | 17.2414 | 17.5055 |
| PTK7    | 19.1783 | 18.9875 | 19.0907 | 18.6987 | 19.1104 | 18.2246 | 19.1074 | 18.3218 | 18.3777 |
| PTMA    | 17.0045 | 17.0431 | 16.782  | 17.2616 | 17.4711 | 17.4614 | 18.3188 | 16.474  | 17.8173 |
| PTPLAD1 | 21.0177 | 21.0778 | 20.8758 | 20.6594 | 20.8955 | 20.6857 | 20.8278 | 20.9521 | 21.109  |
| PTPN1   | 22.0526 | 21.5466 | 21.7327 | 21.4289 | 21.3417 | 21.1689 | 21.6417 | 21.5846 | 21.617  |
| PTPN11  | 19.8155 | 20.7866 | 19.6205 | 19.6752 | 19.4758 | 19.1584 | 19.5121 | 19.5015 | 19.5988 |
| PTPN12  | 18.7066 | 18.8074 | 18.9962 | 18.7199 | 18.5407 | 18.991  | 19.1265 | 18.9704 | 19.1609 |
| PTPN23  | 24.0213 | 24.4613 | 24.6539 | 24.1013 | 24.6603 | 24.3824 | 24.9097 | 24.0779 | 24.7061 |
| PTPRF   | 20.4388 | 20.0996 | 20.1793 | 20.0454 | 20.0609 | 20.0353 | 20.5059 | 20.1443 | 19.7942 |
| PTRF    | 20.846  | 20.4609 | 20.7579 | 20.5926 | 20.5646 | 20.3367 | 20.2376 | 19.8285 | 19.9143 |
| PTRH2   | 20.328  | 19.8494 | 20.2824 | 20.3093 | 20.3248 | 20.5812 | 20.7202 | 20.2237 | 20.3239 |
| PUF60   | 22.7265 | 22.214  | 22.5422 | 22.3968 | 22.0406 | 22.3301 | 22.4829 | 22.452  | 22.7405 |
| PURA    | 20.7181 | 20.4067 | 20.4623 | 20.4353 | 20.3764 | 20.5031 | 21.1029 | 20.5448 | 20.3421 |
| PURB    | 20.6474 | 20.4066 | 20.5951 | 20.5631 | 20.5509 | 20.4892 | 20.8999 | 20.5156 | 20.6153 |
| PUS1    | 19.6293 | 19.0919 | 19.0962 | 18.9394 | 18.8818 | 19.1813 | 19.4268 | 19.1747 | 19.286  |
| PUS7    | 19.2156 | 18.9075 | 19.2494 | 19.3482 | 18.9701 | 19.1065 | 19.6673 | 19.1305 | 19.3609 |
| PWP1    | 18.2557 | 18.3893 | 18.628  | 18.485  | 18.4975 | 18.1886 | 18.2709 | 18.1312 | 18.3377 |
| PWP2    | 19.6728 | 19.5782 | 19.3158 | 19.4769 | 19.554  | 19.0113 | 19.6033 | 19.4726 | 19.419  |
| PXMP2   | 15.4827 | 16.1547 | 16.5341 | 16.651  | 16.4483 | 15.8377 | 16.3125 | 16.5765 | 16.419  |
| PXN     | 19.3368 | 19.7461 | 18.7043 | 19.37   | 18.8061 | 19.3359 | 18.677  | 18.7937 | 19.3423 |
| PYCR1   | 20.7995 | 20.6215 | 20.7436 | 20.4707 | 20.409  | 20.3396 | 20.5057 | 20.1007 | 20.4878 |
| PYCR2   | 20.1085 | 22.7281 | 20.218  | 19.9864 | 19.8069 | 20.5254 | 20.8649 | 20.1476 | 20.4718 |
| PYGB    | 25.6825 | 25.4374 | 25.4457 | 25.478  | 25.2613 | 25.2952 | 25.7164 | 25.5303 | 25.6744 |
| PYGL    | 20.5383 | 20.359  | 20.5066 | 20.2224 | 20.2409 | 20.3157 | 20.6104 | 20.4216 | 20.3886 |
| QARS    | 22.4069 | 22.4358 | 22.3585 | 22.3328 | 22.198  | 22.1103 | 22.5222 | 22.1984 | 22.3475 |

|          |         |         |         |         |         |         |         |         |         |
|----------|---------|---------|---------|---------|---------|---------|---------|---------|---------|
| QDPR     | 19.4919 | 19.2257 | 19.499  | 19.3415 | 19.3001 | 19.1354 | 19.4454 | 19.3408 | 19.3329 |
| QIL1     | 19.7454 | 19.986  | 19.8836 | 19.7834 | 19.559  | 19.7081 | 19.9096 | 19.7823 | 20.1075 |
| QKI      | 20.6978 | 19.8881 | 20.4997 | 20.7182 | 20.5414 | 20.7873 | 20.4925 | 20.6061 | 20.8448 |
| QRICH1   | 18.8489 | 18.5113 | 18.7664 | 18.3591 | 18.7419 | 18.2644 | 18.903  | 18.6745 | 18.0753 |
| QSOX2    | 18.5804 | 18.9379 | 18.6737 | 18.8109 | 18.2939 | 17.7364 | 17.9065 | 18.729  | 19.1529 |
| QTRTD1   | 19.5956 | 19.2926 | 19.3817 | 19.0271 | 19.4578 | 19.0992 | 19.3989 | 19.4002 | 18.8019 |
| RAB10    | 21.2557 | 21.0623 | 21.1536 | 21.1308 | 21.3088 | 20.766  | 21.478  | 21.217  | 21.2514 |
| RAB11B   | 23.3067 | 23.4841 | 23.483  | 23.3213 | 23.4059 | 23.3954 | 23.7902 | 23.2588 | 23.2751 |
| RAB13    | 22.5936 | 22.7516 | 22.6416 | 22.6627 | 22.411  | 22.8393 | 22.9461 | 22.7978 | 23.2358 |
| RAB14    | 21.5585 | 20.9535 | 21.1892 | 21.1896 | 21.1066 | 21.2702 | 21.196  | 21.1226 | 21.5239 |
| RAB18    | 21.0708 | 21.2323 | 21.3473 | 21.1181 | 21.0961 | 21.3866 | 21.7285 | 21.4172 | 21.6469 |
| RAB1B    | 22.338  | 22.2103 | 22.0256 | 22.1423 | 22.0486 | 22.402  | 21.9219 | 22.2828 | 22.1743 |
| RAB21    | 21.4055 | 21.5806 | 21.7568 | 21.5983 | 21.7028 | 21.4768 | 21.8784 | 21.5844 | 21.5997 |
| RAB22A   | 19.1234 | 19.4835 | 19.1278 | 19.2126 | 18.8497 | 18.8293 | 18.9898 | 18.5468 | 19.0406 |
| RAB2A    | 21.5335 | 21.5296 | 21.3313 | 21.3769 | 21.3098 | 21.5613 | 21.7112 | 21.4731 | 21.6602 |
| RAB34    | 19.9238 | 20.5391 | 19.5471 | 20.4279 | 19.7723 | 20.209  | 19.2213 | 19.7531 | 20.4727 |
| RAB35    | 20.0753 | 19.3762 | 19.7533 | 19.9821 | 19.9186 | 20.3641 | 19.6947 | 20.0729 | 19.8597 |
| RAB3D    | 17.0274 | 17.1167 | 16.9603 | 16.6321 | 17.3796 | 16.5668 | 16.5742 | 16.9012 | 16.6552 |
| RAB3GAP1 | 21.5397 | 21.3212 | 21.2109 | 21.5523 | 21.4495 | 19.431  | 21.4071 | 21.6489 | 21.0018 |
| RAB3GAP2 | 19.0163 | 19.9292 | 19.6735 | 19.7286 | 19.6605 | 19.8942 | 20.2181 | 20.2547 | 20.4849 |
| RAB5A    | 19.8811 | 19.4612 | 19.1588 | 19.5123 | 19.1351 | 19.3227 | 18.2493 | 19.3617 | 18.8278 |
| RAB5B    | 18.4419 | 17.6234 | 17.3676 | 18.2551 | 17.299  | 18.3644 | 17.6552 | 18.2816 | 17.8428 |
| RAB5C    | 21.7422 | 21.1261 | 21.2876 | 21.457  | 21.3685 | 21.7305 | 21.5113 | 21.5994 | 21.4527 |
| RAB6A    | 21.6878 | 21.6491 | 21.7346 | 21.7256 | 21.4553 | 21.7719 | 21.6654 | 21.5558 | 21.6798 |
| RAB6C    | 18.8262 | 19.1709 | 18.7967 | 18.4737 | 18.578  | 18.3713 | 18.2041 | 18.9206 | 18.7442 |
| RAB7A    | 23.1028 | 23.3031 | 23.519  | 23.1809 | 23.1194 | 23.1512 | 23.3893 | 23.0997 | 23.1983 |
| RAB8A    | 21.3356 | 19.1885 | 18.6898 | 18.8211 | 18.9962 | 19.286  | 19.1556 | 19.1862 | 19.0886 |
| RAB8B    | 17.7067 | 18.3849 | 17.8076 | 17.6446 | 17.8456 | 18.2448 | 18.579  | 17.5736 | 18.0148 |
| RABAC1   | 19.3134 | 19.3463 | 19.4153 | 19.0631 | 18.9974 | 19.2204 | 19.7555 | 19.3555 | 19.4591 |
| RABGGTA  | 17.4526 | 18.2106 | 18.0195 | 17.9003 | 17.7516 | 17.8796 | 18.2572 | 17.92   | 18.3484 |
| RABGGTB  | 19.4045 | 19.5017 | 19.2238 | 19.2301 | 19.0492 | 19.2298 | 18.9857 | 19.1847 | 19.4996 |
| RAC1     | 22.6012 | 22.1527 | 22.7515 | 22.6048 | 22.5475 | 23.2248 | 23.2571 | 22.7559 | 23.0033 |
| RACGAP1  | 18.5802 | 18.5332 | 18.767  | 18.4598 | 18.2436 | 18.3383 | 19.1325 | 18.403  | 18.6792 |
| RAD18    | 16.5568 | 17.0013 | 17.697  | 17.4609 | 17.0042 | 17.0964 | 17.1801 | 16.5041 | 16.7226 |
| RAD21    | 20.8822 | 20.5539 | 20.748  | 20.4228 | 20.6679 | 20.4412 | 21.0034 | 20.5714 | 20.6042 |
| RAD23A   | 17.173  | 17.3944 | 17.3995 | 17.4921 | 17.9487 | 16.9045 | 16.0929 | 17.4336 | 17.1794 |
| RAD23B   | 20.5679 | 21.0306 | 21.1062 | 21.2381 | 20.9854 | 20.8339 | 21.2967 | 20.985  | 21.3096 |
| RAD50    | 17.1427 | 17.8281 | 17.7865 | 17.6204 | 17.6383 | 17.252  | 18.1569 | 17.7187 | 17.8272 |
| RAE1     | 20.7043 | 20.7397 | 20.8352 | 20.6664 | 20.4681 | 20.5634 | 20.4829 | 20.5109 | 20.6067 |
| RAI14    | 17.4005 | 17.8743 | 17.9634 | 17.3538 | 17.2427 | 17.513  | 18.274  | 17.7344 | 17.8503 |
| RALA     | 20.4984 | 20.6507 | 20.9344 | 21.1314 | 21.115  | 21.0864 | 21.4493 | 20.8037 | 21.2191 |
| RALB     | 19.237  | 19.0355 | 19.356  | 18.7377 | 19.2195 | 18.9769 | 19.7335 | 18.969  | 19.1292 |
| RALY     | 22.6004 | 22.3095 | 22.7052 | 22.4547 | 22.2449 | 22.3277 | 22.5532 | 22.3409 | 22.5883 |
| RAN      | 25.59   | 25.5802 | 25.4557 | 25.4921 | 25.1864 | 25.4857 | 25.5878 | 25.4233 | 25.5102 |
| RANBP1   | 22.892  | 22.4194 | 22.6575 | 22.7067 | 22.7377 | 22.8551 | 23.1156 | 22.7159 | 22.7912 |
| RANBP2   | 21.1821 | 20.9382 | 20.9422 | 20.8431 | 20.477  | 20.796  | 20.8631 | 20.9659 | 21.1787 |
| RANBP6   | 16.9362 | 16.9268 | 16.6385 | 17.4067 | 16.8315 | 16.4983 | 16.6764 | 16.8909 | 16.7431 |
| RANBP9   | 18.1656 | 17.6279 | 17.7954 | 17.4662 | 17.8544 | 17.9476 | 18.0289 | 17.9705 | 17.7125 |
| RANGAP1  | 21.8124 | 21.943  | 21.8999 | 21.7815 | 21.5781 | 21.5771 | 21.9577 | 21.5978 | 21.713  |
| RAP1A    | 20.3479 | 20.2952 | 20.0415 | 20.4599 | 19.8171 | 20.4194 | 19.8111 | 20.6127 | 20.8141 |
| RAP1B    | 21.816  | 21.5999 | 21.5313 | 21.6709 | 21.1821 | 21.2382 | 20.6972 | 21.3958 | 21.4738 |
| RAP1GAP2 | 20.5987 | 20.6269 | 20.5562 | 20.688  | 20.6306 | 21.2801 | 21.6268 | 21.067  | 21.3705 |
| RAP1GDS1 | 20.0362 | 19.8315 | 19.9707 | 19.8923 | 19.5636 | 19.6767 | 19.9599 | 19.8452 | 19.7415 |
| RAPH1    | 17.8128 | 17.8839 | 17.9904 | 17.7749 | 17.7225 | 17.7558 | 17.796  | 17.9155 | 18.1171 |
| RARS     | 22.0402 | 22.0503 | 22.1922 | 21.9434 | 21.8269 | 21.6792 | 22.0135 | 21.5804 | 21.7583 |
| RASAL2   | 16.016  | 17.0428 | 16.5432 | 16.6658 | 16.5414 | 16.4741 | 16.6919 | 15.9448 | 16.4004 |

|        |         |         |         |         |         |         |         |         |         |
|--------|---------|---------|---------|---------|---------|---------|---------|---------|---------|
| RAVER1 | 20.4529 | 20.005  | 20.1319 | 20.2835 | 20.0312 | 20.1356 | 20.4717 | 20.1429 | 20.2397 |
| RB1    | 18.9931 | 18.1447 | 18.3876 | 18.1323 | 18.2129 | 17.9577 | 18.168  | 18.611  | 18.8827 |
| RBBP4  | 23.2836 | 22.4456 | 22.6068 | 23.0423 | 22.7502 | 22.9623 | 23.2184 | 22.9119 | 23.1343 |
| RBBP7  | 21.5303 | 21.1152 | 21.2639 | 21.2117 | 21.2    | 21.1487 | 21.3332 | 21.0802 | 21.31   |
| RBFOX2 | 18.229  | 18.8189 | 18.7565 | 19.0589 | 18.6277 | 18.8134 | 19.336  | 19.0144 | 18.8555 |
| RBM10  | 20.3598 | 20.2786 | 20.1609 | 20.2552 | 20.2562 | 20.5593 | 20.4913 | 20.3133 | 20.3406 |
| RBM12  | 20.857  | 20.6879 | 20.9657 | 20.6614 | 20.7356 | 20.7616 | 21.2833 | 20.9188 | 20.8991 |
| RBM12B | 18.7748 | 19.0877 | 18.8918 | 18.8392 | 18.7422 | 18.438  | 18.6325 | 18.7687 | 19.0104 |
| RBM14  | 21.9199 | 21.5759 | 21.7879 | 22.0194 | 21.8353 | 21.9333 | 22.2041 | 21.694  | 21.9025 |
| RBM15  | 18.3346 | 18.8374 | 18.9094 | 18.5492 | 18.4903 | 18.715  | 19.0452 | 18.5767 | 19.0592 |
| RBM17  | 19.9887 | 17.8087 | 20.6468 | 19.8716 | 18.7541 | 19.275  | 19.3014 | 19.2164 | 20.5165 |
| RBM19  | 17.3013 | 16.8562 | 16.8026 | 16.4802 | 17.0821 | 16.8722 | 17.5307 | 17.1878 | 17.185  |
| RBM25  | 21.2665 | 20.9068 | 21.1015 | 20.9605 | 21.0902 | 21.1379 | 21.6184 | 21.1426 | 21.7994 |
| RBM26  | 18.0993 | 18.2349 | 18.1708 | 18.1975 | 17.9407 | 18.1067 | 18.5126 | 18.2054 | 18.4227 |
| RBM28  | 16.8752 | 17.2705 | 17.0494 | 16.6539 | 16.686  | 16.571  | 17.2889 | 17.2196 | 17.0494 |
| RBM3   | 21.491  | 21.1872 | 21.2706 | 21.5008 | 21.2836 | 21.023  | 20.7805 | 21.2521 | 21.0925 |
| RBM39  | 21.9347 | 21.7612 | 21.7599 | 21.6604 | 21.5988 | 21.7581 | 22.0371 | 21.8227 | 21.9077 |
| RBM4   | 21.8636 | 21.58   | 21.3937 | 21.5225 | 21.4356 | 21.6523 | 21.8514 | 21.5822 | 21.8218 |
| RBM42  | 19.0803 | 19.1289 | 19.2384 | 18.8854 | 18.8935 | 18.9268 | 19.3893 | 18.769  | 18.9433 |
| RBM5   | 16.7094 | 17.1511 | 17.349  | 17.0592 | 17.2476 | 17.6525 | 17.2075 | 17.5299 | 17.985  |
| RBM6   | 18.5596 | 18.144  | 18.4719 | 18.1471 | 18.1389 | 18.2395 | 18.5483 | 18.0859 | 18.1308 |
| RBM8A  | 21.6455 | 21.3413 | 21.5969 | 21.683  | 21.3592 | 21.4378 | 21.3888 | 21.4952 | 21.911  |
| RBMX   | 20.5247 | 20.8642 | 20.2981 | 20.5798 | 20.4918 | 20.6802 | 20.5984 | 20.3831 | 20.8627 |
| RCC1   | 22.1943 | 22.3484 | 22.2631 | 22.1089 | 22.0185 | 22.2923 | 22.6664 | 22.361  | 22.4187 |
| RCC2   | 22.5692 | 22.1992 | 22.4448 | 22.2293 | 22.184  | 21.9406 | 22.1832 | 22.118  | 22.0673 |
| RCL1   | 19.1213 | 19.0973 | 18.8276 | 18.9098 | 18.7521 | 18.9334 | 19.1306 | 19.0014 | 19.0304 |
| RCN1   | 21.9147 | 21.833  | 21.9588 | 21.9317 | 21.4151 | 21.5756 | 22.1227 | 21.7094 | 22.1265 |
| RCN2   | 20.0258 | 19.5798 | 19.6987 | 19.8476 | 19.6978 | 19.4295 | 19.4107 | 19.5559 | 19.494  |
| RCN3   | 18.4194 | 19.5492 | 19.1656 | 19.5714 | 19.5713 | 19.419  | 19.4666 | 19.4748 | 20.2409 |
| RCOR1  | 19.3767 | 19.1317 | 18.861  | 19.0711 | 18.6641 | 18.7776 | 18.8729 | 18.9149 | 18.8793 |
| RDH10  | 18.8271 | 18.4657 | 18.6292 | 18.4858 | 18.3562 | 18.7327 | 19.1307 | 18.8058 | 18.5277 |
| RDH11  | 18.2579 | 19.0474 | 20.2035 | 19.8355 | 19.951  | 20.3948 | 20.791  | 20.2226 | 20.6045 |
| RDX    | 20.1788 | 19.9243 | 19.9699 | 20.4292 | 19.9831 | 19.7568 | 20.1164 | 20.0457 | 20.1097 |
| RECQL  | 22.1112 | 22.0316 | 22.0487 | 22.0483 | 21.7257 | 21.8585 | 22.0324 | 21.9097 | 22.0646 |
| REEP5  | 20.7391 | 20.8274 | 20.6044 | 20.8109 | 20.2611 | 20.7482 | 20.4823 | 20.5666 | 20.887  |
| RELA   | 19.4203 | 19.3446 | 19.0956 | 19.214  | 18.9828 | 18.9795 | 19.3071 | 19.1283 | 19.3313 |
| REPS1  | 17.151  | 17.1941 | 17.5716 | 16.9496 | 17.0145 | 16.5904 | 17.2808 | 16.4398 | 16.3672 |
| RER1   | 19.9099 | 19.9611 | 19.9279 | 19.906  | 19.7084 | 19.2254 | 19.8027 | 19.8241 | 19.8856 |
| RETSAT | 17.827  | 18.8644 | 19.1807 | 18.6408 | 18.4187 | 18.3603 | 18.4056 | 18.2899 | 18.43   |
| RFC2   | 19.9473 | 19.7127 | 20.4857 | 20.191  | 19.7859 | 20.1033 | 20.3043 | 19.9153 | 20.1841 |
| RFC3   | 20.1229 | 19.8403 | 20      | 19.9152 | 19.7205 | 20.0123 | 19.4193 | 19.6869 | 19.7909 |
| RFC4   | 20.3941 | 20.104  | 20.2119 | 20.1508 | 19.9977 | 20.1291 | 20.428  | 20.155  | 20.1827 |
| RFC5   | 19.6594 | 19.3879 | 19.6019 | 19.4723 | 19.3753 | 19.2357 | 19.697  | 19.3476 | 19.4597 |
| RFTN1  | 18.1666 | 18.2803 | 18.0238 | 18.1216 | 17.9382 | 17.1759 | 17.291  | 17.2188 | 17.1981 |
| RHEB   | 21.1227 | 20.4895 | 20.9111 | 21.1673 | 21.0249 | 21.2193 | 21.3397 | 21.198  | 21.4464 |
| RHOA   | 22.0673 | 21.8534 | 21.9432 | 21.626  | 21.6065 | 21.8328 | 21.5163 | 21.7811 | 22.1133 |
| RHOC   | 21.6    | 21.1989 | 21.4977 | 21.1854 | 21.5083 | 21.8003 | 22.1732 | 21.908  | 21.8998 |
| RHOG   | 20.226  | 18.8694 | 19.7995 | 19.2585 | 19.226  | 19.9614 | 19.448  | 19.3361 | 19.011  |
| RHOT1  | 18.3187 | 18.2746 | 18.4164 | 18.1802 | 18.1912 | 18.1408 | 18.7436 | 18.3317 | 18.3209 |
| RHOT2  | 19.9969 | 19.9465 | 19.7139 | 19.8078 | 19.508  | 19.48   | 19.777  | 19.6813 | 19.7719 |
| RIC8A  | 19.6716 | 19.3698 | 19.4439 | 19.3562 | 19.4439 | 19.4949 | 19.6783 | 19.5281 | 19.0397 |
| RIF1   | 19.2475 | 19.0801 | 19.1188 | 18.8824 | 18.8618 | 18.6017 | 18.9312 | 18.7752 | 18.8407 |
| RIN1   | 17.4355 | 17.836  | 17.57   | 17.6365 | 17.6193 | 16.9918 | 17.9419 | 17.1403 | 17.1231 |
| RING1  | 17.6033 | 18.2728 | 17.6277 | 17.6022 | 17.5724 | 18.1926 | 18.4505 | 17.9752 | 18.1551 |
| RIOK1  | 18.3162 | 18.2815 | 18.8069 | 18.2489 | 18.3056 | 18.699  | 18.7795 | 18.2753 | 18.4596 |
| RMDN3  | 19.9143 | 19.5148 | 19.5533 | 19.1936 | 19.4511 | 19.5619 | 19.9747 | 19.6321 | 19.4149 |

|          |         |         |         |         |         |         |         |         |         |
|----------|---------|---------|---------|---------|---------|---------|---------|---------|---------|
| RNASEH2A | 18.8179 | 19.1171 | 18.5572 | 18.6948 | 18.4618 | 18.8621 | 19.0679 | 18.7525 | 18.7949 |
| RNF114   | 20.2469 | 19.9338 | 20.1266 | 19.8051 | 19.9897 | 19.982  | 20.192  | 19.7095 | 20.0064 |
| RNF20    | 24.1613 | 24.2421 | 24.1481 | 24.1547 | 23.5705 | 23.3251 | 22.3583 | 23.5134 | 23.8242 |
| RNF213   | 16.9201 | 17.3194 | 17.5854 | 16.9699 | 17.1582 | 17.4021 | 17.8279 | 17.6713 | 17.2698 |
| RNF40    | 20.6202 | 20.6402 | 20.6341 | 20.4552 | 20.3784 | 20.2708 | 20.6256 | 20.4731 | 20.6841 |
| RNGTT    | 18.3716 | 18.3157 | 18.2197 | 18.172  | 17.9093 | 18.0541 | 18.0436 | 18.1698 | 18.0821 |
| RNH1     | 22.7694 | 22.8559 | 22.9357 | 22.9721 | 22.8006 | 23.0012 | 23.2729 | 22.7049 | 22.9045 |
| RNMT     | 18.4641 | 17.9955 | 18.4795 | 17.9645 | 18.1087 | 17.6414 | 18.2106 | 18.3056 | 17.9294 |
| RNPEP    | 20.8392 | 20.5857 | 20.5958 | 20.7605 | 20.3698 | 20.4897 | 20.7464 | 20.5959 | 20.5349 |
| RNPS1    | 20.2296 | 20.4379 | 19.9614 | 20.3316 | 20.0343 | 20.3079 | 20.3961 | 20.302  | 20.4667 |
| ROCK2    | 20.0973 | 20.117  | 20.174  | 20.0205 | 19.5579 | 19.6004 | 19.8637 | 19.6512 | 20.0189 |
| ROMO1    | 20.8927 | 20.4968 | 20.053  | 20.9713 | 19.713  | 20.4978 | 20.6554 | 20.8561 | 20.8933 |
| RPA1     | 21.6491 | 21.6665 | 21.4823 | 21.4663 | 21.2933 | 21.3148 | 21.7385 | 21.6419 | 21.746  |
| RPA2     | 19.3637 | 19.2262 | 19.6423 | 19.6898 | 19.7688 | 19.1351 | 19.4617 | 19.9123 | 19.6083 |
| RPA3     | 21.2095 | 21.293  | 21.244  | 21.3506 | 21.1287 | 21.2689 | 21.0725 | 20.9464 | 21.2423 |
| RPAP1    | 17.579  | 17.4742 | 17.3646 | 17.346  | 17.253  | 16.959  | 17.5012 | 17.3748 | 17.4547 |
| RPAP3    | 19.3067 | 19.0992 | 19.2094 | 19.0103 | 19.0033 | 18.8087 | 19.3188 | 19.1244 | 19.292  |
| RPF2     | 16.5511 | 16.8259 | 16.4801 | 16.4845 | 16.7277 | 16.354  | 15.9387 | 16.1686 | 15.7899 |
| RPIA     | 18.6472 | 18.1088 | 18.9268 | 18.5097 | 18.3975 | 18.8367 | 18.7119 | 19.102  | 18.8035 |
| RPL10    | 22.2151 | 22.0203 | 22.0848 | 22.143  | 21.7049 | 21.74   | 21.9245 | 22.163  | 22.1521 |
| RPL10A   | 23.2926 | 23.7737 | 23.4956 | 23.4358 | 23.2776 | 23.4658 | 23.4781 | 23.147  | 23.3859 |
| RPL11    | 23.672  | 23.536  | 23.5047 | 23.5857 | 23.3954 | 23.5797 | 23.7314 | 23.4714 | 23.6925 |
| RPL12    | 25.0509 | 25.0675 | 25.0893 | 25.0319 | 24.9144 | 25.0737 | 25.2574 | 24.9338 | 25.1268 |
| RPL13    | 24.3092 | 24.3278 | 24.412  | 24.2379 | 24.1154 | 24.2737 | 24.477  | 24.2295 | 24.3049 |
| RPL13A   | 23.3167 | 23.0431 | 23.3893 | 23.5671 | 23.5363 | 23.4265 | 23.7554 | 23.4062 | 23.4943 |
| RPL14    | 21.6699 | 21.3028 | 21.6305 | 21.8111 | 21.8617 | 21.918  | 21.7539 | 21.847  | 21.6336 |
| RPL15    | 23.542  | 23.7489 | 23.6894 | 23.6415 | 23.5246 | 23.3399 | 23.5803 | 23.6078 | 23.5912 |
| RPL17    | 23.0902 | 22.6659 | 23.187  | 23.0308 | 23.0292 | 23.3034 | 22.9236 | 22.9802 | 22.8994 |
| RPL18    | 21.5402 | 20.7036 | 21.3551 | 21.3609 | 21.4454 | 21.3354 | 21.8399 | 21.6753 | 21.5097 |
| RPL18A   | 23.6685 | 23.7107 | 23.6894 | 23.5544 | 23.4128 | 23.6626 | 23.8248 | 23.6849 | 23.8094 |
| RPL19    | 20.749  | 20.3836 | 20.7924 | 20.9248 | 20.6698 | 20.6466 | 21.1583 | 20.8128 | 20.6847 |
| RPL21    | 23.0339 | 22.8741 | 23.0378 | 23.2716 | 22.9679 | 23.0579 | 23.4257 | 23.149  | 23.4416 |
| RPL22    | 23.7852 | 24.2933 | 24.2201 | 24.0882 | 24.0451 | 24.0694 | 24.2523 | 24.1421 | 24.277  |
| RPL23    | 23.2635 | 23.3605 | 23.2021 | 23.0615 | 22.8711 | 23.3038 | 23.037  | 23.0914 | 23.1805 |
| RPL23A   | 23.1998 | 23.5135 | 23.1272 | 23.3794 | 23.1783 | 23.6062 | 23.7164 | 23.3628 | 23.3475 |
| RPL24    | 22.5567 | 22.4751 | 22.4051 | 22.4068 | 22.1913 | 22.4265 | 22.2562 | 22.3695 | 22.6797 |
| RPL26    | 22.8878 | 23.0128 | 23.1559 | 22.9183 | 22.9993 | 23.0297 | 23.2679 | 22.9266 | 22.9944 |
| RPL27    | 24.2383 | 23.917  | 24.2205 | 23.9808 | 24.0682 | 24.0285 | 24.2317 | 24.0431 | 24.1279 |
| RPL27A   | 24.2948 | 24.4788 | 24.4268 | 24.27   | 24.1397 | 24.417  | 24.2905 | 24.3514 | 24.5025 |
| RPL28    | 21.8749 | 21.506  | 21.8574 | 22.093  | 22.1493 | 22.207  | 22.4158 | 22.1766 | 22.4235 |
| RPL3     | 23.2083 | 21.4138 | 23.0982 | 23.2168 | 23.211  | 23.6314 | 23.5721 | 23.2686 | 23.5264 |
| RPL30    | 23.8237 | 23.6516 | 23.6671 | 23.5233 | 23.3677 | 23.4738 | 23.6207 | 23.6605 | 23.5971 |
| RPL31    | 21.5776 | 20.3814 | 21.5897 | 21.757  | 21.7304 | 21.8409 | 22.0391 | 21.6353 | 21.9334 |
| RPL32    | 21.6166 | 21.8575 | 21.6367 | 21.6334 | 21.4272 | 21.701  | 21.8029 | 21.7161 | 21.8721 |
| RPL34    | 22.6481 | 22.333  | 22.8436 | 23.3714 | 23.0722 | 23.1385 | 24.0764 | 23.3549 | 23.6825 |
| RPL35    | 19.2668 | 19.312  | 19.8739 | 19.938  | 20.0421 | 19.3052 | 19.9769 | 19.683  | 19.7947 |
| RPL35A   | 23.0433 | 23.4314 | 23.0255 | 23.0543 | 22.8625 | 22.9516 | 22.7004 | 23.0047 | 23.2054 |
| RPL36    | 21.7241 | 21.7515 | 21.7485 | 22.0597 | 22.1244 | 22.0467 | 22.2328 | 22.1056 | 22.2014 |
| RPL37A   | 22.105  | 21.8853 | 21.8621 | 22.0353 | 22.0109 | 22.0234 | 22.1043 | 21.9995 | 22.154  |
| RPL38    | 22.8184 | 22.3839 | 22.5408 | 22.5801 | 22.3245 | 22.672  | 22.6851 | 22.6694 | 22.4838 |
| RPL39    | 19.1277 | 16.7713 | 18.7906 | 19.9436 | 18.8907 | 20.0367 | 19.2247 | 19.8795 | 19.792  |
| RPL4     | 24.0739 | 23.8053 | 23.98   | 23.8811 | 23.8287 | 23.7944 | 24.4083 | 23.9692 | 24.0059 |
| RPL5     | 24.1539 | 23.8125 | 24.1012 | 23.8226 | 23.7946 | 23.9457 | 24.2231 | 23.9649 | 24.032  |
| RPL6     | 22.0302 | 21.3787 | 22.3039 | 22.1945 | 22.4434 | 22.2305 | 22.9191 | 22.2355 | 22.2101 |
| RPL7     | 23.4813 | 23.0516 | 23.5376 | 23.5992 | 23.4903 | 23.3934 | 23.6958 | 23.4616 | 23.5302 |
| RPL7A    | 23.5932 | 23.6912 | 23.879  | 23.575  | 23.3549 | 23.8008 | 24.0021 | 23.7256 | 23.8368 |

|         |         |         |         |         |         |         |         |         |         |
|---------|---------|---------|---------|---------|---------|---------|---------|---------|---------|
| RPL7L1  | 18.163  | 18.5101 | 18.3001 | 18.1054 | 18.079  | 17.5214 | 18.3682 | 18.2572 | 18.1505 |
| RPL8    | 22.5654 | 21.1133 | 22.4934 | 22.6448 | 22.506  | 22.7722 | 22.7159 | 22.5046 | 22.593  |
| RPL9    | 22.9849 | 22.8655 | 23.0431 | 22.8192 | 22.8424 | 23.0586 | 23.4436 | 22.9786 | 22.8739 |
| RPLP0   | 24.908  | 24.6934 | 24.7025 | 24.617  | 24.5035 | 24.5595 | 24.8339 | 24.6447 | 24.7914 |
| RPLP1   | 21.9522 | 21.5817 | 21.5282 | 22.0892 | 22.1334 | 21.1594 | 21.9741 | 21.46   | 21.98   |
| RPLP2   | 21.7742 | 21.4812 | 21.514  | 21.7385 | 21.3074 | 21.6613 | 21.8636 | 21.3994 | 21.9216 |
| RPN1    | 23.2299 | 23.0933 | 23.3408 | 23.017  | 23.0034 | 22.8523 | 23.3528 | 23.1199 | 23.2082 |
| RPN2    | 23.0887 | 22.7751 | 22.862  | 22.7374 | 22.6598 | 22.3276 | 22.7644 | 22.8389 | 22.8997 |
| RPP30   | 19.9585 | 19.9039 | 19.8888 | 19.7792 | 19.6928 | 19.7127 | 20.2535 | 19.8657 | 19.8161 |
| RPP40   | 17.5961 | 17.5135 | 17.3432 | 17.4627 | 17.253  | 15.5329 | 17.2912 | 17.0596 | 16.5386 |
| RPRD1B  | 20.4646 | 20.5173 | 20.834  | 20.3596 | 20.6207 | 20.425  | 20.5196 | 20.2268 | 20.1354 |
| RPRD2   | 19.1325 | 18.9936 | 19.0976 | 18.9795 | 18.914  | 19.3776 | 19.3694 | 18.8448 | 19.139  |
| RPS10   | 23.6884 | 23.5861 | 23.4221 | 23.4699 | 23.5478 | 22.9952 | 23.1885 | 23.2784 | 23.0949 |
| RPS11   | 23.5572 | 24.8147 | 23.5284 | 23.414  | 23.4563 | 23.8251 | 23.866  | 23.5339 | 23.4678 |
| RPS12   | 24.5228 | 24.5878 | 24.6649 | 24.582  | 24.5634 | 24.817  | 24.9077 | 24.6489 | 24.6159 |
| RPS13   | 23.3187 | 22.202  | 23.6368 | 23.7473 | 23.3719 | 23.6742 | 23.401  | 22.9628 | 22.8297 |
| RPS14   | 24.1747 | 24.4133 | 24.1813 | 24.1222 | 24.0533 | 24.275  | 24.0436 | 24.049  | 24.4273 |
| RPS15   | 21.0253 | 19.0475 | 20.7835 | 21.3226 | 20.6574 | 20.9863 | 20.7886 | 20.9579 | 21.2798 |
| RPS15A  | 24.3605 | 24.4002 | 24.5929 | 24.2265 | 24.2425 | 24.513  | 24.6781 | 24.399  | 24.4565 |
| RPS16   | 24.1561 | 23.9539 | 23.9828 | 24.081  | 24.0034 | 24.1918 | 24.4656 | 23.978  | 24.1104 |
| RPS17L  | 22.9823 | 22.239  | 22.7486 | 23.0076 | 22.76   | 23.0502 | 23.0938 | 22.8561 | 22.9847 |
| RPS18   | 23.2159 | 22.6072 | 23.403  | 23.4942 | 23.1513 | 23.6345 | 23.3978 | 23.2117 | 23.4333 |
| RPS19   | 23.5709 | 22.9086 | 23.7013 | 23.5043 | 23.4717 | 23.8736 | 23.9051 | 23.5802 | 23.618  |
| RPS2    | 24.4128 | 24.5514 | 24.4451 | 24.4076 | 24.2336 | 24.3401 | 24.4826 | 24.3074 | 24.3649 |
| RPS20   | 21.987  | 22.6424 | 21.9922 | 22.0933 | 22.0537 | 21.7923 | 21.8107 | 21.7643 | 22.069  |
| RPS21   | 21.9734 | 20.9645 | 22.2949 | 22.5335 | 22.4115 | 22.3951 | 22.5477 | 22.0848 | 22.7046 |
| RPS23   | 22.691  | 22.4445 | 22.7249 | 22.7822 | 22.5974 | 22.3238 | 22.7805 | 22.6167 | 22.7438 |
| RPS24   | 22.1835 | 22.2523 | 22.1726 | 22.2222 | 22.2145 | 22.407  | 21.7354 | 22.0391 | 21.9262 |
| RPS25   | 23.3319 | 23.0771 | 23.3318 | 23.0652 | 22.9684 | 22.9876 | 23.5862 | 23.2468 | 23.2313 |
| RPS26   | 22.7888 | 22.5268 | 22.5521 | 22.7078 | 22.6363 | 22.2261 | 23.0342 | 22.7557 | 22.8346 |
| RPS27   | 23.0494 | 22.9248 | 22.9531 | 22.8427 | 22.6126 | 23.1824 | 23.1302 | 23.0662 | 23.0803 |
| RPS27A  | 25.8587 | 24.8346 | 25.8413 | 25.7257 | 25.8562 | 25.8975 | 25.8366 | 25.652  | 25.7299 |
| RPS28   | 23.0416 | 22.969  | 22.9369 | 22.9451 | 22.9057 | 23.2005 | 23.1864 | 22.8687 | 23.1703 |
| RPS29   | 21.1721 | 20.5854 | 21.239  | 20.7233 | 21.1741 | 21.7316 | 22.3747 | 21.5081 | 21.2559 |
| RPS3    | 25.1813 | 25.2611 | 25.1293 | 25.1134 | 24.8873 | 25.0458 | 25.3466 | 25.0588 | 25.2262 |
| RPS3A   | 24.4127 | 24.2629 | 24.3971 | 24.2142 | 23.9343 | 24.3475 | 24.52   | 24.3671 | 24.3354 |
| RPS4X   | 23.4659 | 23.0969 | 23.6826 | 23.7778 | 23.6483 | 23.6637 | 23.8264 | 23.5698 | 23.7396 |
| RPS5    | 23.6103 | 23.5588 | 23.4351 | 23.1862 | 23.3313 | 22.3304 | 23.6062 | 23.3285 | 23.019  |
| RPS6    | 23.964  | 23.9875 | 23.9631 | 23.9676 | 23.782  | 24.009  | 23.9986 | 23.9839 | 24.2001 |
| RPS6KA1 | 20.2789 | 20.0577 | 20.3114 | 20.115  | 20.1469 | 20.2791 | 20.7679 | 20.453  | 20.2708 |
| RPS6KA3 | 19.2352 | 18.7546 | 18.9218 | 19.0432 | 18.7792 | 19.041  | 19.3511 | 19.0258 | 18.9292 |
| RPS7    | 23.5691 | 22.5618 | 23.396  | 23.7844 | 23.5911 | 23.6274 | 23.5886 | 23.5158 | 23.806  |
| RPS8    | 24.5745 | 24.6387 | 24.5079 | 24.5193 | 24.4603 | 24.6908 | 24.9833 | 24.6798 | 24.8489 |
| RPS9    | 22.9248 | 22.9114 | 22.9446 | 22.9332 | 22.8672 | 23.0986 | 23.2255 | 23.027  | 22.9648 |
| RPSA    | 24.7867 | 23.5144 | 24.5951 | 24.7796 | 24.71   | 24.901  | 25.0638 | 24.7115 | 24.801  |
| RPTOR   | 13.5448 | 17.7355 | 18.0165 | 17.9547 | 17.8826 | 16.4367 | 16.9945 | 17.2545 | 17.1228 |
| RRAGA   | 19.24   | 19.1784 | 19.2437 | 19.0652 | 18.9962 | 19.1716 | 19.3787 | 19.2643 | 19.3047 |
| RRAGC   | 19.0171 | 18.8396 | 18.8189 | 18.7001 | 18.6458 | 18.2863 | 18.9944 | 18.6486 | 18.5638 |
| RRBP1   | 22.2232 | 22.2398 | 22.0255 | 22.0821 | 22.0338 | 22.2561 | 22.5082 | 22.2441 | 22.6727 |
| RRM1    | 21.4113 | 21.5291 | 21.3699 | 21.5136 | 21.3599 | 21.1237 | 21.2138 | 21.2007 | 21.3799 |
| RRM2    | 21.975  | 21.8344 | 22.015  | 21.7464 | 21.6201 | 21.6222 | 21.7781 | 21.6483 | 21.6519 |
| RRP12   | 18.7357 | 18.7554 | 18.7501 | 18.6261 | 18.3185 | 18.0971 | 18.6323 | 18.5487 | 18.1508 |
| RRP15   | 19.697  | 19.5888 | 19.7105 | 19.5485 | 19.3387 | 19.5442 | 19.8433 | 19.5757 | 19.8102 |
| RRP9    | 18.3596 | 17.6151 | 17.9562 | 17.9999 | 18.2684 | 17.9245 | 17.6553 | 17.9578 | 17.6343 |
| RRS1    | 19.7881 | 19.7339 | 19.5662 | 19.8393 | 19.5567 | 19.3149 | 19.5115 | 19.6208 | 19.4875 |
| RSF1    | 19.3232 | 21.4439 | 19.232  | 19.3625 | 19.0373 | 19.2549 | 19.7044 | 19.1521 | 19.2582 |

|         |         |         |         |         |         |         |         |         |         |
|---------|---------|---------|---------|---------|---------|---------|---------|---------|---------|
| RSL1D1  | 20.8859 | 20.9202 | 20.9559 | 20.9135 | 20.8005 | 20.7869 | 20.8833 | 20.6887 | 20.8827 |
| RSU1    | 19.5485 | 19.6337 | 19.5417 | 19.6246 | 19.4979 | 18.5649 | 19.5312 | 19.3199 | 19.4451 |
| RTCA    | 19.5774 | 19.5194 | 19.5295 | 19.5631 | 19.4623 | 19.5594 | 19.7123 | 19.604  | 19.374  |
| RTF1    | 19.052  | 19.0536 | 19.3396 | 19.2135 | 19.136  | 19.1663 | 19.4555 | 19.3594 | 19.4816 |
| RTFDC1  | 18.0651 | 17.9361 | 18.0678 | 18.1848 | 18.0721 | 18.7391 | 17.8439 | 17.9653 | 17.7847 |
| RTN3    | 19.8014 | 21.2506 | 19.5597 | 19.8547 | 19.5995 | 19.7491 | 19.9655 | 19.6468 | 19.9555 |
| RTN4    | 23.5837 | 23.3501 | 23.7186 | 23.5619 | 23.6109 | 23.3177 | 23.6309 | 23.2714 | 23.3838 |
| RUNX1   | 20.1209 | 20.5346 | 20.4197 | 20.596  | 20.2462 | 20.6203 | 20.565  | 20.205  | 20.4126 |
| RUVBL1  | 22.8174 | 22.8714 | 22.7507 | 22.7466 | 22.66   | 22.7509 | 23.1797 | 22.6738 | 22.9296 |
| RUVBL2  | 22.407  | 22.4911 | 22.3243 | 22.3412 | 22.0981 | 22.194  | 22.4041 | 22.1233 | 22.6229 |
| S100A10 | 24.1151 | 23.7632 | 23.7819 | 23.7932 | 23.6901 | 23.9038 | 24.5179 | 24.1328 | 24.1358 |
| S100A11 | 21.2842 | 20.4616 | 20.8543 | 21.1748 | 21.1254 | 20.8938 | 21.1949 | 20.5101 | 21.2871 |
| S100A13 | 20.0719 | 19.1797 | 19.7883 | 20.0421 | 20.0075 | 20.2516 | 20.1085 | 20.1926 | 20.428  |
| S100A6  | 22.4828 | 21.756  | 22.3569 | 22.657  | 22.3397 | 23.1492 | 22.8955 | 22.6112 | 23.2175 |
| SAAL1   | 19.326  | 19.3428 | 19.3088 | 19.2702 | 19.2549 | 20.2978 | 19.5612 | 19.1437 | 19.2727 |
| SACM1L  | 19.7237 | 19.3903 | 19.6015 | 19.3668 | 19.3358 | 19.6678 | 19.8661 | 19.673  | 19.6444 |
| SAE1    | 21.1005 | 21.4967 | 21.3958 | 21.323  | 21.0235 | 21.1502 | 21.2562 | 21.0131 | 21.2953 |
| SAFB    | 20.9219 | 21.0123 | 21.3358 | 21.1451 | 21.3359 | 21.6158 | 21.8323 | 21.4015 | 21.715  |
| SAFB2   | 19.814  | 19.758  | 19.7158 | 19.8622 | 19.6977 | 19.9832 | 19.9476 | 19.7686 | 20.0708 |
| SAMHD1  | 19.1716 | 18.8713 | 19.1141 | 19.0398 | 18.8765 | 19.1181 | 19.2549 | 19.3615 | 19.2569 |
| SAMM50  | 21.1445 | 21.0331 | 21.2434 | 20.8082 | 20.8049 | 20.6613 | 21.3368 | 20.858  | 21.1248 |
| SAP18   | 19.3114 | 19.4011 | 19.611  | 19.5698 | 19.6934 | 19.5863 | 18.9805 | 19.3896 | 19.2585 |
| SAP30BP | 23.2654 | 23.4024 | 22.364  | 23.1088 | 22.6774 | 22.6643 | 21.5661 | 22.5869 | 22.8337 |
| SAR1A   | 20.8488 | 21.1092 | 20.8567 | 20.8541 | 21.0302 | 21.1807 | 21.1122 | 20.9135 | 20.9538 |
| SAR1B   | 16.7854 | 16.5574 | 16.8944 | 16.2595 | 16.7491 | 16.0359 | 16.7475 | 17.2479 | 16.0622 |
| SARNP   | 21.2844 | 21.0976 | 21.3054 | 21.1    | 21.0231 | 21.3624 | 21.5408 | 21.0657 | 21.4826 |
| SARS    | 21.5742 | 21.4708 | 21.4704 | 21.4952 | 21.1852 | 21.306  | 21.3158 | 21.4806 | 21.5334 |
| SARS2   | 18.0177 | 18.5998 | 18.7225 | 18.4629 | 18.3912 | 18.6924 | 19.082  | 18.4482 | 18.7502 |
| SART1   | 20.3022 | 19.9289 | 20.3158 | 20.281  | 20.267  | 20.4249 | 20.5619 | 20.4668 | 20.7871 |
| SART3   | 20.7434 | 20.6996 | 20.567  | 20.6169 | 20.5208 | 20.3007 | 20.546  | 20.5325 | 20.5847 |
| SBDS    | 21.0377 | 20.6982 | 21.1171 | 20.6566 | 20.6736 | 20.9768 | 20.8845 | 20.6835 | 20.5737 |
| SCAF11  | 18.8303 | 17.9509 | 17.7986 | 18.2922 | 17.7715 | 17.103  | 17.5905 | 17.8904 | 17.8244 |
| SCAMP2  | 19.9725 | 19.2501 | 19.6304 | 20.2477 | 19.4138 | 20.0049 | 19.9913 | 19.8055 | 19.8945 |
| SCAMP3  | 21.4709 | 19.5628 | 21.5815 | 21.543  | 21.5752 | 21.9842 | 22.0905 | 21.587  | 21.772  |
| SCARB2  | 18.9106 | 20.0732 | 18.7297 | 19.0317 | 18.6809 | 16.7938 | 18.1712 | 18.7465 | 18.466  |
| SCCPDH  | 20.1652 | 20.2357 | 20.3516 | 20.1382 | 20.0363 | 20.4811 | 20.9066 | 20.529  | 20.3703 |
| SCFD1   | 19.4679 | 19.2533 | 19.228  | 18.9748 | 19.0201 | 19.2758 | 19.4248 | 19.1943 | 19.3111 |
| SCP2    | 20.4408 | 20.4784 | 20.8958 | 20.7723 | 20.8208 | 20.9336 | 21.2276 | 20.4886 | 20.9554 |
| SCPEP1  | 16.6984 | 17.3584 | 17.009  | 16.6738 | 16.9748 | 17.8732 | 16.9876 | 17.3191 | 16.9109 |
| SCRIB   | 18.1737 | 18.2791 | 17.9014 | 17.998  | 17.8254 | 17.5814 | 17.6583 | 18.0127 | 17.588  |
| SCRN1   | 21.78   | 21.5873 | 21.4034 | 21.6299 | 21.4608 | 21.679  | 21.6633 | 21.4976 | 21.5055 |
| SCYL1   | 19.3704 | 19.221  | 19.1791 | 19.1091 | 18.9716 | 19.006  | 19.4955 | 19.1641 | 19.0277 |
| SDF2L1  | 20.9323 | 20.5175 | 20.8605 | 20.7926 | 20.6755 | 20.9149 | 20.7045 | 20.8564 | 20.979  |
| SDHA    | 20.9395 | 20.684  | 20.8047 | 20.9356 | 20.5145 | 20.4635 | 20.647  | 20.618  | 20.8186 |
| SDHB    | 20.052  | 19.7996 | 20.1572 | 19.7372 | 19.6567 | 19.9221 | 19.9621 | 19.8699 | 20.1784 |
| SDHC    | 18.9875 | 18.7061 | 18.956  | 18.8007 | 18.6647 | 18.6917 | 18.8152 | 18.5971 | 18.894  |
| SDHD    | 17.871  | 18.2274 | 18.1214 | 17.9377 | 17.5473 | 18.2137 | 17.1314 | 17.8286 | 17.8991 |
| SEC11A  | 21.0183 | 21.2646 | 21.265  | 20.8168 | 20.7341 | 20.9301 | 21.3109 | 21.0844 | 21.4013 |
| SEC11C  | 19.428  | 19.5119 | 19.1354 | 19.8753 | 19.5306 | 19.5095 | 19.6426 | 18.9    | 19.0288 |
| SEC13   | 21.4388 | 20.8838 | 20.8209 | 21.1494 | 20.8843 | 21.1639 | 21.3754 | 21.1106 | 21.3292 |
| SEC14L2 | 18.5576 | 17.8926 | 18.8236 | 18.9679 | 18.9656 | 19.548  | 19.4496 | 19.4335 | 19.4311 |
| SEC22B  | 20.6476 | 20.6361 | 20.937  | 20.534  | 20.6099 | 20.7544 | 21.0065 | 20.7183 | 20.9343 |
| SEC23A  | 20.4347 | 20.0538 | 20.1165 | 19.9879 | 20.1203 | 19.9346 | 20.2169 | 19.952  | 19.8393 |
| SEC23B  | 21.0391 | 20.4974 | 21.2307 | 21.0532 | 20.8351 | 21.1366 | 21.0579 | 20.9936 | 21.2144 |
| SEC23IP | 20.3812 | 20.1746 | 19.9153 | 20.1916 | 19.7999 | 19.9392 | 19.8162 | 20.2217 | 20.3531 |
| SEC24A  | 19.5133 | 19.2259 | 19.1018 | 19.2091 | 19.0108 | 18.3854 | 19.2382 | 19.3408 | 19.2832 |

|          |        |         |         |         |         |         |         |         |         |         |
|----------|--------|---------|---------|---------|---------|---------|---------|---------|---------|---------|
| SEC24B   |        | 18.2987 | 18.2268 | 18.3351 | 18.2298 | 18.081  | 17.8025 | 18.2842 | 18.2055 | 18.3073 |
| SEC24C   |        | 21.4149 | 21.2131 | 21.2685 | 21.1065 | 21.1542 | 21.4272 | 21.8723 | 21.4193 | 21.3611 |
| SEC24D   |        | 18.5284 | 18.404  | 18.4398 | 18.2921 | 18.0937 | 17.7931 | 18.3455 | 18.2894 | 18.0882 |
| SEC31A   |        | 21.5614 | 21.0082 | 21.8251 | 21.294  | 21.3424 | 21.8753 | 22.2926 | 21.6688 | 21.7376 |
| SEC61A1  |        | 23.0895 | 21.3171 | 23.2914 | 23.359  | 23.1061 | 23.2113 | 23.3524 | 22.9914 | 23.4859 |
| SEC61B   |        | 20.5572 | 19.7972 | 20.5864 | 20.5937 | 20.2673 | 20.6445 | 20.8754 | 20.4959 | 20.9251 |
| SEC63    |        | 19.7275 | 20.1329 | 20.2157 | 19.7818 | 20.2176 | 20.2109 | 20.0516 | 20.0251 | 20.1321 |
| SEH1L    |        | 19.7806 | 19.7295 | 19.6425 | 19.6664 | 19.4678 | 19.4378 | 19.4542 | 19.7853 | 19.7264 |
| SEL1L    |        | 19.4161 | 18.7286 | 18.8619 | 18.4655 | 18.8163 | 18.0372 | 18.3599 | 18.3175 | 18.547  |
| SENP3    |        | 18.5823 | 18.2659 | 18.4942 | 18.1477 | 18.5735 | 18.4428 | 18.8322 | 18.6059 | 18.586  |
| SEPHS1   |        | 19.701  | 19.6487 | 19.7003 | 19.5078 | 19.4024 | 19.6975 | 19.6636 | 19.2894 | 19.4163 |
|          | Sep 10 | 18.3706 | 18.623  | 18.7079 | 18.8046 | 18.2805 | 18.4594 | 18.9283 | 18.758  | 19.1191 |
|          | Sep 11 | 21.4772 | 20.7075 | 20.9917 | 20.9904 | 20.7196 | 20.9381 | 20.5124 | 20.7499 | 21.0527 |
|          | Sep 02 | 22.4127 | 22.241  | 22.2723 | 21.9035 | 22.1236 | 22.1194 | 22.4472 | 22.205  | 21.9474 |
|          | Sep 07 | 22.0238 | 22.0491 | 22.0205 | 21.7611 | 22.0204 | 21.8174 | 21.932  | 21.9699 | 22.1224 |
|          | Sep 08 | 20.5524 | 20.209  | 20.0696 | 20.2454 | 20.1184 | 20.1462 | 20.1803 | 20.1112 | 20.1419 |
|          | Sep 09 | 22.8684 | 22.8725 | 23.0122 | 22.8291 | 22.7148 | 23.0783 | 23.3421 | 22.836  | 23.148  |
| SERBP1   |        | 21.6036 | 21.2346 | 21.1419 | 21.8603 | 21.4122 | 21.7195 | 20.9154 | 21.2485 | 21.5626 |
| SERPINA3 |        | 19.5772 | 21.0328 | 19.3023 | 19.0599 | 19.1712 | 19.5703 | 19.8036 | 19.7856 | 19.8027 |
| SERPINB5 |        | 22.3751 | 22.4044 | 22.3293 | 22.4185 | 22.1069 | 22.481  | 22.6904 | 22.4974 | 22.5772 |
| SERPINB6 |        | 20.9575 | 20.5733 | 20.8143 | 20.6693 | 20.4239 | 20.9247 | 21.0164 | 20.8134 | 21.0473 |
| SERPINB8 |        | 20.0081 | 19.69   | 19.7608 | 19.7765 | 19.4821 | 19.8028 | 19.8501 | 20.0234 | 20.2079 |
| SERPINE2 |        | 20.5572 | 20.0973 | 20.6288 | 20.2771 | 20.5332 | 20.9315 | 21.3295 | 20.6967 | 20.3858 |
| SERPINH1 |        | 24.5838 | 24.2325 | 24.3236 | 23.9225 | 24.2301 | 24.0601 | 24.5269 | 24.0248 | 23.995  |
| SET      |        | 22.7487 | 22.3196 | 23.113  | 22.9627 | 22.8688 | 23.7227 | 24.1045 | 23.3255 | 23.392  |
| SETD3    |        | 14.428  | 14.6217 | 15.1177 | 14.0584 | 14.5529 | 14.0353 | 13.7442 | 15.1434 | 14.9259 |
| SF1      |        | 21.1578 | 19.6649 | 20.6661 | 20.8379 | 20.809  | 20.9446 | 20.7445 | 20.7904 | 20.5667 |
| SF3A1    |        | 22.9907 | 22.6408 | 22.6123 | 22.7998 | 22.5426 | 22.8253 | 23.0808 | 22.826  | 23.0443 |
| SF3A2    |        | 20.6467 | 19.7532 | 20.4838 | 20.546  | 20.256  | 20.0404 | 20.1236 | 20.2677 | 20.5869 |
| SF3A3    |        | 22.5095 | 22.002  | 22.6636 | 22.3311 | 22.3478 | 22.7172 | 23.1195 | 22.5846 | 22.6791 |
| SF3B1    |        | 22.4394 | 22.0351 | 22.2296 | 22.2388 | 22.1748 | 22.5033 | 22.9963 | 22.1759 | 22.2401 |
| SF3B14   |        | 20.6095 | 20.3985 | 20.2423 | 20.0049 | 20.3104 | 20.5026 | 20.4059 | 20.5452 | 20.1874 |
| SF3B2    |        | 22.3918 | 21.4284 | 22.2996 | 22.5381 | 22.36   | 22.5415 | 22.5925 | 22.2167 | 22.4995 |
| SF3B3    |        | 23.4659 | 23.0539 | 23.0192 | 22.9346 | 22.786  | 22.6024 | 23.0249 | 22.8969 | 23.1033 |
| SF3B4    |        | 21.8619 | 21.5618 | 21.6793 | 21.6376 | 21.6193 | 21.7232 | 21.5507 | 21.8649 | 21.7969 |
| SF3B5    |        | 18.5476 | 18.4732 | 18.9139 | 18.9836 | 18.7674 | 18.6545 | 18.1119 | 18.5262 | 19.0743 |
| SFPQ     |        | 24.6194 | 24.21   | 24.5329 | 24.2548 | 24.2222 | 24.2124 | 24.5318 | 24.332  | 24.4682 |
| SFT2D2   |        | 16.9539 | 17.257  | 17.0049 | 16.8862 | 17.3641 | 17.7981 | 17.4288 | 18.0672 | 17.5782 |
| SFXN1    |        | 21.201  | 21.3719 | 21.1804 | 21.1166 | 21.165  | 21.3373 | 21.5795 | 21.1769 | 21.3556 |
| SFXN3    |        | 20.3564 | 20.5057 | 20.3844 | 20.2465 | 20.1619 | 20.1934 | 20.4079 | 20.3751 | 20.4486 |
| SGK196   |        | 17.0103 | 16.7038 | 17.2995 | 17.7042 | 17.4889 | 17.3725 | 16.6274 | 16.0873 | 16.2891 |
| SGPL1    |        | 16.9326 | 17.5325 | 17.3664 | 17.4063 | 17.6024 | 16.8079 | 17.9095 | 18.0122 | 17.7653 |
| SGTA     |        | 20.1523 | 20.1072 | 20.2899 | 20.104  | 19.8865 | 20.0313 | 20.3086 | 20.107  | 20.2424 |
| SH3BGRL3 |        | 21.4564 | 21.3048 | 21.3841 | 21.5395 | 21.2747 | 21.3746 | 21.1095 | 21.3454 | 21.4463 |
| SH3BP1   |        | 17.6453 | 17.8338 | 17.5941 | 17.6902 | 17.477  | 17.5762 | 17.7933 | 17.6325 | 17.7759 |
| SH3BP4   |        | 18.8641 | 18.7711 | 18.8508 | 18.6233 | 18.4662 | 18.4824 | 18.937  | 18.4369 | 18.5817 |
| SH3GL1   |        | 19.4615 | 19.0399 | 19.0075 | 19.4331 | 18.9429 | 19.501  | 19.3263 | 19.7625 | 19.6239 |
| SH3GLB1  |        | 19.7984 | 19.4807 | 19.8519 | 19.6974 | 19.4652 | 19.6064 | 19.6037 | 19.3485 | 19.5335 |
| SH3KBP1  |        | 19.6814 | 21.9087 | 19.6952 | 18.9957 | 19.9155 | 20.1185 | 19.5729 | 19.373  | 19.5814 |
| SHC1     |        | 17.3696 | 17.2219 | 17.7674 | 17.6386 | 17.6378 | 16.8054 | 16.437  | 17.5485 | 17.2671 |
| SHMT1    |        | 20.1829 | 19.8295 | 20.0519 | 19.9239 | 19.7484 | 20.1361 | 20.3785 | 20.0853 | 20.072  |
| SHMT2    |        | 22.8105 | 22.7873 | 22.6572 | 22.5451 | 22.4344 | 22.6038 | 22.8384 | 22.5112 | 22.7557 |
| SIN3A    |        | 18.0112 | 18.3246 | 18.2408 | 18.0584 | 17.9437 | 17.9327 | 18.5745 | 18.2499 | 17.9439 |
| SKIV2L   |        | 18.1015 | 18.102  | 18.1639 | 18.3672 | 18.0251 | 18.2131 | 18.6413 | 18.2505 | 18.4822 |
| SKIV2L2  |        | 20.8945 | 21.0646 | 21.0749 | 20.8964 | 20.8808 | 20.9126 | 21.4232 | 20.9488 | 21.1481 |
| SKP1     |        | 21.172  | 20.764  | 21.0899 | 21.1209 | 21.0102 | 20.8367 | 20.9545 | 21.1886 | 21.379  |

|          |         |         |         |         |         |         |         |         |         |
|----------|---------|---------|---------|---------|---------|---------|---------|---------|---------|
| SLC12A2  | 19.1096 | 18.9458 | 18.6844 | 18.7695 | 18.9392 | 18.7411 | 19.246  | 18.7817 | 18.9202 |
| SLC12A4  | 16.5231 | 16.9507 | 16.7652 | 16.8803 | 16.4705 | 16.7003 | 17.1926 | 17.0845 | 16.6075 |
| SLC12A9  | 16.9307 | 16.009  | 16.0347 | 16.2606 | 15.9711 | 15.4952 | 15.8727 | 15.6276 | 15.2816 |
| SLC16A1  | 17.6031 | 17.8932 | 17.5182 | 19.8392 | 17.8166 | 19.6328 | 16.9989 | 17.3007 | 17.2248 |
| SLC1A4   | 22.6441 | 22.4193 | 22.3451 | 22.4643 | 22.284  | 22.3729 | 22.655  | 22.5269 | 22.8679 |
| SLC1A5   | 22.0891 | 22.2051 | 22.0179 | 21.9458 | 22.075  | 21.1689 | 21.7638 | 21.7424 | 21.647  |
| SLC25A1  | 19.8581 | 19.6524 | 19.5753 | 19.4597 | 19.4014 | 19.8031 | 19.974  | 19.6842 | 19.7441 |
| SLC25A10 | 20.8939 | 21.2479 | 20.7252 | 20.6984 | 20.5507 | 21.3939 | 21.6189 | 21.2301 | 21.5723 |
| SLC25A11 | 21.0037 | 20.9661 | 20.8517 | 20.6363 | 20.6102 | 20.7027 | 21.0249 | 20.7481 | 21.0492 |
| SLC25A12 | 17.7836 | 18.6834 | 18.7247 | 18.2618 | 18.1343 | 18.0722 | 18.5422 | 18.5269 | 18.4855 |
| SLC25A13 | 21.5548 | 21.5401 | 21.553  | 21.6826 | 21.4225 | 21.6252 | 22.0749 | 21.5624 | 21.9268 |
| SLC25A22 | 20.1729 | 19.7436 | 20.0696 | 20.034  | 20.0103 | 20.3087 | 20.7891 | 20.3881 | 20.3757 |
| SLC25A24 | 19.9294 | 20.1558 | 20.0737 | 19.7916 | 19.6219 | 20.4329 | 19.9522 | 19.9417 | 20.3333 |
| SLC25A3  | 22.9502 | 22.6478 | 23.0259 | 23.0127 | 22.8094 | 22.7032 | 22.6375 | 22.6251 | 22.8714 |
| SLC25A4  | 20.3286 | 20.0264 | 19.9853 | 19.86   | 19.8283 | 19.6537 | 19.6789 | 19.5934 | 19.6457 |
| SLC25A5  | 23.7699 | 23.5324 | 23.5694 | 23.3235 | 23.5198 | 23.6217 | 24.2122 | 23.7283 | 23.6403 |
| SLC25A6  | 22.4014 | 22.1993 | 22.0381 | 21.9445 | 21.9288 | 22.2052 | 22.4286 | 22.2323 | 22.2509 |
| SLC26A2  | 20.524  | 20.4051 | 20.4339 | 20.2367 | 20.3015 | 20.2583 | 20.5427 | 20.3683 | 20.5171 |
| SLC29A1  | 18.2362 | 18.3406 | 18.1699 | 18.0704 | 18.1577 | 17.328  | 17.9599 | 17.9475 | 17.9495 |
| SLC2A1   | 20.9383 | 21.1688 | 21.4063 | 21.2568 | 21.3779 | 21.8185 | 22.0241 | 21.6861 | 22.0015 |
| SLC30A7  | 20.1752 | 19.6073 | 20.2784 | 20.2957 | 20.2497 | 19.9672 | 20.3934 | 20.0416 | 19.8277 |
| SLC35B2  | 19.8014 | 20.0923 | 19.5183 | 19.4068 | 19.416  | 19.9121 | 20.4972 | 19.824  | 20.0324 |
| SLC39A7  | 16.5858 | 16.753  | 16.5362 | 16.1841 | 16.6641 | 16.1479 | 17.9506 | 17.3839 | 17.0165 |
| SLC3A2   | 24.5838 | 24.3299 | 24.5475 | 24.4058 | 24.2311 | 24.7218 | 25.2707 | 24.9157 | 24.9804 |
| SLC4A1AP | 19.4082 | 18.7252 | 19.3569 | 19.1636 | 19.0667 | 18.9539 | 19.2864 | 19.0518 | 19.1054 |
| SLC4A2   | 17.3022 | 17.933  | 17.8004 | 17.4353 | 17.445  | 18.205  | 18.3702 | 18.1809 | 18.3523 |
| SLC4A7   | 17.5378 | 17.3353 | 17.6827 | 17.3927 | 17.6651 | 16.1073 | 16.5436 | 16.7748 | 16.1045 |
| SLC5A3   | 18.9873 | 19.456  | 18.5972 | 18.4568 | 18.5014 | 18.592  | 18.561  | 18.5821 | 18.7614 |
| SLC7A1   | 18.2693 | 18.3394 | 18.3366 | 18.1129 | 18.1312 | 18.5851 | 18.2039 | 18.475  | 17.9605 |
| SLC7A5   | 22.0317 | 21.6065 | 22.111  | 22.0553 | 22.0638 | 22.3244 | 22.5307 | 22.2734 | 22.7061 |
| SLC9A3R1 | 18.129  | 17.9593 | 18.53   | 18.6584 | 18.234  | 18.5725 | 19.0251 | 18.3195 | 18.8632 |
| SLC9A3R2 | 16.9394 | 13.8135 | 15.7914 | 17.146  | 16.3664 | 14.4038 | 15.8971 | 15.7413 | 16.7245 |
| SLIRP    | 20.4333 | 19.4639 | 20.6272 | 20.3338 | 20.4407 | 20.6777 | 21.14   | 20.5299 | 20.3437 |
| SLK      | 19.0446 | 19.3463 | 19.0258 | 19.2524 | 18.6647 | 18.5773 | 18.3938 | 18.981  | 19.2524 |
| SMAD3    | 20.8105 | 21.0625 | 20.5717 | 20.5282 | 20.439  | 20.7583 | 20.9065 | 20.5424 | 20.803  |
| SMAD4    | 18.9548 | 20.06   | 19.04   | 19.3096 | 18.7796 | 19.1774 | 19.3706 | 18.8415 | 19.0454 |
| SNRPGP15 | 20.4609 | 20.7997 | 20.7506 | 20.5463 | 20.844  | 21.4325 | 21.2843 | 20.9109 | 20.8425 |
| SMAP1    | 18.4665 | 18.5009 | 18.557  | 18.5477 | 18.5316 | 18.4397 | 18.7558 | 18.4176 | 18.738  |
| SMARCA1  | 17.1166 | 17.9766 | 17.6425 | 17.5117 | 17.3161 | 17.9541 | 18.0809 | 17.8118 | 17.9462 |
| SMARCA4  | 17.0782 | 17.8015 | 16.5527 | 16.5441 | 16.1657 | 16.7089 | 17.0481 | 16.7922 | 17.1974 |
| SMARCA5  | 20.2675 | 19.9262 | 20.1792 | 20.0654 | 20.16   | 20.2027 | 20.7446 | 20.1987 | 20.3986 |
| SMARCAD1 | 17.6859 | 17.6411 | 17.2726 | 17.4435 | 17.4887 | 16.3772 | 17.1542 | 17.4189 | 17.1262 |
| SMARCB1  | 20.1387 | 19.9098 | 19.8949 | 19.9695 | 19.8814 | 20.0408 | 19.9683 | 19.8994 | 20.178  |
| SMARCC1  | 19.0204 | 18.8504 | 18.7822 | 18.8726 | 18.8015 | 18.7035 | 18.8142 | 18.83   | 18.6669 |
| SMARCC2  | 19.6839 | 19.7569 | 20.1351 | 19.6886 | 19.737  | 19.7835 | 20.3172 | 20.0976 | 20.2187 |
| SMARCD1  | 19.2542 | 19.4258 | 19.6485 | 19.2086 | 19.1984 | 19.5196 | 20.0429 | 19.2628 | 19.5233 |
| SMARCE1  | 19.277  | 18.6119 | 19.5303 | 19.5483 | 19.3092 | 19.6914 | 19.6853 | 19.1018 | 19.5337 |
| SMC1A    | 21.2987 | 20.9288 | 21.1525 | 21.1692 | 21.0786 | 21.0693 | 21.1345 | 21.0742 | 21.2555 |
| SMC2     | 21.4952 | 21.4629 | 21.3634 | 21.2616 | 21.1886 | 21.1489 | 21.496  | 21.2011 | 21.378  |
| SMC3     | 21.3623 | 21.2633 | 21.1559 | 21.2717 | 20.9345 | 20.6589 | 21.1727 | 20.9599 | 21.2044 |
| SMC4     | 21.5414 | 21.4312 | 21.3462 | 21.3399 | 21.0985 | 21.1284 | 21.4342 | 21.2029 | 21.415  |
| SMCHD1   | 17.496  | 18.1981 | 17.9322 | 18.0186 | 18.1025 | 18.3886 | 18.7286 | 18.2771 | 18.3813 |
| SMEK1    | 17.1252 | 17.4734 | 17.0591 | 16.8929 | 16.9254 | 16.0077 | 17.0774 | 16.87   | 17.2056 |
| SMEK2    | 17.5783 | 17.8125 | 17.6569 | 17.5468 | 17.5589 | 17.1889 | 18.153  | 17.5218 | 17.6329 |
| SMG9     | 16.6133 | 16.7956 | 16.4828 | 17.5861 | 17.2131 | 15.1781 | 16.0414 | 16.5694 | 16.7189 |
| SMN1     | 23.1132 | 18.6279 | 22.882  | 23.1574 | 22.6445 | 23.6577 | 22.9673 | 22.9006 | 23.3558 |

|          |         |         |         |         |         |         |         |         |         |
|----------|---------|---------|---------|---------|---------|---------|---------|---------|---------|
| SMNDC1   | 17.0819 | 16.883  | 17.057  | 17.5396 | 16.6133 | 17.7207 | 15.375  | 17.0242 | 17.4606 |
| SMPD4    | 18.5234 | 18.6529 | 18.6414 | 18.4086 | 18.5577 | 18.6081 | 18.8477 | 18.7047 | 18.6568 |
| SMS      | 21.5531 | 21.1795 | 21.5257 | 21.5486 | 21.3878 | 21.622  | 21.6681 | 21.4898 | 21.6534 |
| SMTN     | 16.5795 | 16.492  | 17.4704 | 16.9366 | 16.6828 | 16.8933 | 16.9444 | 16.4491 | 16.6718 |
| SMU1     | 21.4776 | 21.4147 | 21.4917 | 21.3097 | 21.1886 | 21.3529 | 21.5831 | 21.4145 | 21.4769 |
| SND1     | 23.5699 | 23.6116 | 23.5509 | 23.4789 | 23.3376 | 23.6511 | 23.8792 | 23.6954 | 23.9225 |
| SNRNP200 | 22.7832 | 22.0425 | 22.4114 | 22.4031 | 22.3774 | 22.1886 | 22.6385 | 22.2455 | 22.4218 |
| SNRNP40  | 20.8905 | 20.7846 | 20.7802 | 20.9154 | 20.5813 | 20.9881 | 20.8854 | 20.682  | 20.8397 |
| SNRNP70  | 21.64   | 21.6278 | 21.4137 | 21.5888 | 21.3598 | 21.5854 | 21.9293 | 21.447  | 21.5748 |
| SNRPA    | 21.942  | 21.4767 | 21.5533 | 21.6069 | 21.3846 | 21.6747 | 20.9448 | 21.4906 | 21.6269 |
| SNRPA1   | 21.4214 | 21.6083 | 21.6188 | 21.5704 | 21.4289 | 21.9931 | 22.0945 | 21.7126 | 21.8142 |
| SNRPB    | 23.4079 | 23.4704 | 23.5074 | 23.2181 | 23.1223 | 23.1837 | 23.3599 | 23.4324 | 23.5372 |
| SNRPB2   | 21.0262 | 20.9144 | 20.7697 | 20.9475 | 20.9274 | 20.7278 | 20.5394 | 20.7511 | 20.7168 |
| SNRPC    | 22.1454 | 21.6923 | 21.4817 | 21.6543 | 21.0851 | 21.4995 | 21.5807 | 21.5485 | 21.7426 |
| SNRPD1   | 22.6382 | 22.4264 | 22.7867 | 22.202  | 22.5108 | 22.3845 | 22.908  | 22.6654 | 22.7997 |
| SNRPD2   | 23.7398 | 23.5424 | 23.5201 | 23.4019 | 23.4033 | 23.6572 | 23.4748 | 23.5448 | 23.6532 |
| SNRPD3   | 22.8023 | 23.0433 | 23.1227 | 22.8919 | 22.6798 | 22.9338 | 23.0672 | 22.8156 | 23.0983 |
| SNRPE    | 22.5589 | 22.0259 | 22.0408 | 21.9644 | 21.7413 | 21.8913 | 21.9866 | 21.8779 | 22.007  |
| SNRPF    | 20.3351 | 19.8381 | 20.1608 | 20.2914 | 20.003  | 20.3587 | 20.5012 | 20.2005 | 20.6652 |
| SNW1     | 19.4642 | 19.3257 | 19.4401 | 19.5624 | 19.4013 | 19.6307 | 19.2488 | 19.0118 | 19.3417 |
| SNX1     | 20.8718 | 20.8768 | 20.8088 | 20.6631 | 20.6711 | 20.5686 | 20.9356 | 20.525  | 20.7943 |
| SNX12    | 19.4443 | 19.9208 | 19.9692 | 19.9956 | 19.8914 | 20.1172 | 20.3039 | 19.9211 | 20.3746 |
| SNX17    | 17.2865 | 17.6417 | 17.6475 | 17.8669 | 17.7023 | 17.791  | 17.601  | 17.6302 | 17.758  |
| SNX2     | 22.2902 | 22.2269 | 22.7111 | 22.6369 | 22.3464 | 22.5727 | 22.8468 | 22.1747 | 22.2404 |
| SNX27    | 19.2368 | 18.5882 | 19.0192 | 18.9712 | 18.7498 | 19.1284 | 19.7184 | 19.3774 | 19.4737 |
| SNX3     | 20.5743 | 20.5633 | 20.9098 | 20.6608 | 20.546  | 20.7538 | 20.8885 | 20.5744 | 20.6933 |
| SNX4     | 17.9226 | 17.7408 | 17.6844 | 17.4336 | 17.4481 | 17.8095 | 17.9314 | 17.9784 | 17.9065 |
| SNX5     | 21.1408 | 21.065  | 21.1682 | 20.84   | 20.7843 | 20.7449 | 20.9593 | 20.8727 | 21.1311 |
| SNX6     | 18.6196 | 18.6041 | 18.093  | 18.0065 | 17.9509 | 18.7361 | 18.4656 | 18.3879 | 18.4416 |
| SNX9     | 19.1546 | 19.006  | 19.1809 | 19.0474 | 18.8467 | 18.6812 | 19.0718 | 19.012  | 18.9843 |
| SOAT1    | 19.3857 | 19.8486 | 19.3981 | 19.3572 | 19.332  | 19.3725 | 19.71   | 19.4961 | 19.4744 |
| SOD1     | 21.5656 | 21.4442 | 21.467  | 21.671  | 21.31   | 21.602  | 21.8107 | 21.3781 | 21.9237 |
| SOD2     | 23.1296 | 22.0311 | 22.8155 | 22.9899 | 22.8965 | 22.2732 | 22.3287 | 22.5345 | 22.561  |
| SON      | 19.6759 | 19.4691 | 19.374  | 19.4932 | 19.4283 | 19.5283 | 19.6077 | 19.3332 | 19.5782 |
| SORD     | 20.1494 | 19.6926 | 20.1359 | 20.1683 | 19.9328 | 20.1738 | 20.4523 | 20.0137 | 20.3245 |
| SORT1    | 18.4203 | 18.7418 | 18.6525 | 18.6463 | 18.4082 | 17.0314 | 17.5162 | 17.5711 | 17.9323 |
| SOX10    | 20.7657 | 20.0542 | 20.8515 | 20.5369 | 20.6608 | 20.9168 | 21.1305 | 20.7675 | 20.9693 |
| SP100    | 18.764  | 18.3502 | 18.4793 | 18.1068 | 18.3348 | 18.3475 | 18.6174 | 18.5541 | 18.1172 |
| SPAG9    | 19.5985 | 19.1189 | 19.3657 | 19.1255 | 19.1091 | 19.2195 | 19.2216 | 19.1367 | 19.0008 |
| SPATA5   | 18.8789 | 18.4425 | 18.7777 | 18.5602 | 18.6353 | 18.6609 | 18.993  | 18.7137 | 18.3239 |
| SPATA5L1 | 18.0632 | 18.0207 | 18.1643 | 18.1122 | 17.7622 | 18.0182 | 18.3343 | 18.0509 | 18.062  |
| SPATS2L  | 20.0278 | 20.1282 | 19.7048 | 20.0703 | 19.6735 | 19.7233 | 19.7558 | 19.6791 | 19.95   |
| SPC24    | 17.1583 | 17.4536 | 17.3984 | 17.2417 | 17.4575 | 17.0581 | 17.3818 | 17.6388 | 17.7141 |
| SPC25    | 19.6019 | 19.714  | 19.5502 | 19.3396 | 19.5199 | 19.6495 | 19.6294 | 19.6033 | 19.7038 |
| SPCS1    | 18.8985 | 18.9047 | 18.8063 | 19.0432 | 18.8964 | 18.881  | 18.7682 | 18.6599 | 19.0757 |
| SPCS2    | 20.7573 | 21.0042 | 20.8842 | 20.9652 | 20.8019 | 20.8529 | 20.9591 | 20.8043 | 20.9937 |
| SPCS3    | 21.0014 | 20.3852 | 20.7912 | 20.5618 | 20.7366 | 20.8981 | 21.3284 | 20.7318 | 21.0649 |
| SPECC1L  | 19.0857 | 19.0423 | 18.2794 | 18.0895 | 19.0024 | 18.1933 | 19.1348 | 19.0043 | 18.6887 |
| SPG20    | 19.1776 | 19.0597 | 19.2385 | 18.9876 | 19.1114 | 19.1643 | 19.6744 | 19.3043 | 19.7027 |
| SPG21    | 15.3017 | 16.2042 | 15.5385 | 15.3617 | 15.7344 | 14.2998 | 12.1704 | 13.8378 | 14.1416 |
| SPIN1    | 16.6304 | 16.6075 | 16.8732 | 16.2711 | 16.9216 | 15.1639 | 16.8458 | 16.1828 | 16.3113 |
| SPR      | 19.0354 | 20.4586 | 18.917  | 18.771  | 18.5645 | 19.2487 | 20.0086 | 19.3404 | 19.7781 |
| SPTAN1   | 22.118  | 21.597  | 21.5929 | 21.6492 | 21.4845 | 21.4432 | 21.827  | 21.7413 | 21.7983 |
| SPTBN1   | 22.026  | 22.2669 | 22.0949 | 22.1134 | 22.1129 | 21.9342 | 22.3574 | 21.7943 | 22.0139 |
| SPTLC1   | 17.8376 | 18.1816 | 18.013  | 17.6248 | 18.0582 | 17.1205 | 18.0336 | 17.9077 | 17.9799 |
| SPTLC2   | 16.9437 | 16.4417 | 16.4178 | 16.7553 | 16.6904 | 16.8237 | 16.6919 | 16.8277 | 16.5555 |

|         |         |         |         |         |         |         |         |         |         |
|---------|---------|---------|---------|---------|---------|---------|---------|---------|---------|
| SQSTM1  | 19.7969 | 18.9395 | 19.6091 | 19.1929 | 19.0747 | 20.2807 | 20.8793 | 19.8666 | 19.5827 |
| SRC     | 17.5893 | 17.2609 | 17.6316 | 18.1212 | 17.4466 | 17.2527 | 17.3037 | 17.6504 | 17.8486 |
| SRGAP2  | 17.5347 | 17.7317 | 17.1777 | 17.3722 | 17.2951 | 16.8445 | 17.3193 | 17.4068 | 17.8454 |
| SRI     | 21.9489 | 22.0935 | 21.8029 | 21.7264 | 21.6257 | 21.8941 | 22.0292 | 21.5889 | 21.7926 |
| SRM     | 21.6603 | 21.6347 | 21.5716 | 21.5598 | 21.413  | 21.7201 | 22.0408 | 21.6699 | 21.7046 |
| SRP14   | 21.2196 | 21.2585 | 20.9327 | 21.3079 | 20.997  | 21.1481 | 21.0723 | 20.9651 | 21.2079 |
| SRP19   | 19.5456 | 19.417  | 18.9874 | 19.5341 | 19.3118 | 19.7725 | 19.3537 | 19.5732 | 19.4911 |
| SRP54   | 21.3172 | 21.0937 | 21.0942 | 21.0154 | 20.9071 | 20.418  | 21.1488 | 21.0257 | 20.9288 |
| SRP68   | 20.4275 | 20.2775 | 20.2829 | 20.0206 | 20.1249 | 19.8763 | 20.4649 | 20.3054 | 20.3553 |
| SRP72   | 21.2039 | 20.5503 | 20.8558 | 20.9976 | 20.9856 | 20.9041 | 21.028  | 20.9855 | 20.9467 |
| SRP9    | 22.4789 | 22.0598 | 21.8823 | 22.1206 | 21.7465 | 22.0782 | 22.3642 | 22.2213 | 22.1436 |
| SRPK1   | 18.6057 | 18.3779 | 18.5009 | 18.3764 | 17.893  | 17.9542 | 18.0592 | 17.9827 | 17.6903 |
| SRPR    | 19.8229 | 19.5589 | 19.8086 | 19.6021 | 19.5847 | 19.2423 | 19.5787 | 19.3548 | 19.5995 |
| SRPRB   | 21.4968 | 21.5576 | 21.7352 | 21.4222 | 21.4019 | 21.3903 | 21.5497 | 21.354  | 21.6109 |
| SRRM1   | 20.0361 | 19.7494 | 19.6688 | 19.8209 | 19.6027 | 19.7986 | 19.8015 | 19.6761 | 19.8724 |
| SRRM2   | 21.7987 | 20.9068 | 21.6595 | 21.8812 | 21.6892 | 22.0172 | 22.1927 | 21.8142 | 22.0641 |
| SRRT    | 21.5257 | 21.0664 | 21.3487 | 20.9777 | 21.0214 | 21.1465 | 21.3528 | 21.1989 | 21.1161 |
| SRSF1   | 23.7126 | 23.6635 | 23.5728 | 23.8232 | 23.5432 | 23.7113 | 23.9292 | 23.6779 | 23.8531 |
| SRSF10  | 20.0427 | 19.6483 | 19.465  | 20.5151 | 19.4906 | 18.907  | 19.953  | 19.8027 | 19.8631 |
| SRSF11  | 20.7256 | 20.2392 | 20.3807 | 20.665  | 20.5091 | 20.7909 | 21.0142 | 20.5535 | 20.8219 |
| SRSF2   | 21.5259 | 22.2582 | 21.3437 | 21.5979 | 21.5147 | 21.7784 | 22.1461 | 21.6102 | 22.0434 |
| SRSF3   | 23.3349 | 23.6245 | 23.5005 | 23.109  | 23.3503 | 23.4639 | 24.2283 | 23.5286 | 23.4912 |
| SRSF4   | 18.7251 | 18.7996 | 18.4206 | 19.0147 | 18.2784 | 18.6289 | 18.1398 | 18.8486 | 18.7794 |
| SRSF5   | 20.8472 | 21.7102 | 21.1202 | 21.4206 | 20.9069 | 20.7147 | 20.4396 | 21.1968 | 21.4517 |
| SRSF6   | 21.6419 | 20.2405 | 21.1554 | 21.3667 | 21.3628 | 21.7115 | 21.9468 | 21.3607 | 21.7243 |
| SRSF7   | 22.8705 | 22.8625 | 22.8103 | 22.8513 | 22.5846 | 22.8195 | 23.2664 | 22.8474 | 23.0142 |
| SRSF9   | 21.7168 | 21.7735 | 21.6957 | 21.8829 | 21.6943 | 21.7218 | 21.878  | 21.7518 | 21.8822 |
| SSB     | 22.6517 | 22.5176 | 22.2906 | 22.5331 | 22.3563 | 22.602  | 22.326  | 22.503  | 22.2693 |
| SSBP1   | 22.5916 | 22.6222 | 22.7947 | 22.7347 | 22.5423 | 22.7867 | 22.912  | 22.7867 | 23.1935 |
| SSR1    | 21.4222 | 21.3771 | 21.3826 | 21.4385 | 21.2066 | 21.4545 | 21.7167 | 21.3387 | 21.5215 |
| SSR3    | 19.986  | 19.8898 | 19.6165 | 20.1311 | 19.2596 | 19.9383 | 19.8268 | 20.1686 | 20.4355 |
| SSR4    | 21.9765 | 21.998  | 22.1929 | 22.1996 | 22.1658 | 21.8367 | 22.4935 | 22.3318 | 22.378  |
| SSRP1   | 22.8052 | 22.7697 | 22.7912 | 22.67   | 22.6399 | 22.7122 | 23.1566 | 22.8179 | 22.8492 |
| SSSCA1  | 19.5956 | 19.3267 | 19.2172 | 19.6028 | 19.142  | 19.3926 | 18.8442 | 19.213  | 19.4027 |
| SSX2    | 18.6542 | 18.3441 | 18.3512 | 18.1467 | 17.9729 | 18.2054 | 18.2939 | 18.1601 | 18.489  |
| ST13    | 23.198  | 23.3799 | 23.4013 | 23.4471 | 23.3467 | 23.5632 | 23.8769 | 23.5491 | 23.7769 |
| ST3GAL4 | 14.041  | 15.8549 | 15.9094 | 14.7346 | 16.0007 | 15.955  | 15.1029 | 15.8764 | 15.5651 |
| STAG2   | 18.9264 | 18.7171 | 18.9413 | 19.2363 | 19.0828 | 18.5842 | 18.5833 | 18.6425 | 18.408  |
| STAM    | 19.3599 | 18.9377 | 19.1975 | 18.8782 | 18.8759 | 18.8249 | 19.23   | 18.878  | 19.1476 |
| STARD13 | 19.3484 | 18.7081 | 18.7637 | 18.6441 | 18.4035 | 18.6567 | 18.9591 | 18.7429 | 18.8502 |
| STAT1   | 20.6365 | 20.0409 | 20.4185 | 20.075  | 20.1057 | 20.1301 | 20.4129 | 20.1229 | 20.1094 |
| STAT3   | 20.1157 | 19.5792 | 20.0912 | 20.1673 | 19.6946 | 19.4157 | 19.8716 | 19.7195 | 19.8809 |
| STAU1   | 20.9627 | 20.7833 | 21.2255 | 21.0742 | 20.859  | 21.1236 | 21.5034 | 20.9161 | 21.2043 |
| STIM1   | 18.6451 | 18.4751 | 18.1236 | 18.3366 | 18.2304 | 18.1642 | 18.2137 | 18.2711 | 18.3699 |
| STIP1   | 24.0492 | 23.3686 | 23.9584 | 23.8967 | 23.8057 | 23.8826 | 24.0136 | 23.7284 | 23.8099 |
| STK24   | 19.8715 | 19.8883 | 19.9973 | 19.9591 | 19.6649 | 19.5268 | 19.7053 | 19.6425 | 19.6925 |
| STK39   | 18.1521 | 18.4327 | 18.4065 | 18.2889 | 18.2744 | 17.7238 | 17.8305 | 18.3    | 18.0878 |
| STMN1   | 22.7201 | 22.8159 | 22.9337 | 22.6336 | 22.6413 | 22.6929 | 22.9407 | 22.4735 | 22.7913 |
| STOM    | 17.4874 | 16.6827 | 16.9432 | 16.7581 | 17.6181 | 18.0483 | 18.3224 | 18.1333 | 18.2569 |
| STOML2  | 21.171  | 20.2178 | 20.9152 | 21.0612 | 20.7995 | 20.6781 | 21.1099 | 20.9426 | 21.3565 |
| STRA6   | 18.2305 | 18.5263 | 18.3869 | 18.169  | 18.3119 | 18.9318 | 19.618  | 18.7974 | 19.0811 |
| STRAP   | 22.4675 | 22.4693 | 22.1486 | 22.5505 | 22.1538 | 22.0928 | 22.1312 | 22.1213 | 22.3687 |
| STRN    | 19.3721 | 18.7325 | 18.9099 | 18.709  | 18.572  | 18.9606 | 19.0682 | 18.6983 | 18.7607 |
| STT3A   | 21.3576 | 21.5141 | 21.1963 | 21.179  | 21.0384 | 20.8936 | 21.5323 | 21.2398 | 21.3262 |
| STT3B   | 20.716  | 20.8201 | 20.6466 | 20.6426 | 20.6006 | 20.5283 | 20.8009 | 20.8498 | 21.0682 |
| STUB1   | 21.6165 | 21.7515 | 21.7826 | 21.729  | 21.4847 | 21.6155 | 21.9524 | 21.326  | 21.6871 |

|         |         |         |         |         |         |         |         |         |         |
|---------|---------|---------|---------|---------|---------|---------|---------|---------|---------|
| STX12   | 18.0973 | 17.1706 | 18.3273 | 19.1061 | 18.5927 | 19.1488 | 18.8481 | 17.6815 | 18.0748 |
| STX6    | 16.1857 | 16.4641 | 16.1026 | 17.5157 | 16.4098 | 15.9327 | 15.2741 | 16.3545 | 16.4019 |
| STXBP1  | 21.3536 | 20.5049 | 22.4276 | 20.2729 | 21.5891 | 22.3654 | 22.9739 | 22.2958 | 21.5876 |
| STXBP3  | 17.8276 | 17.6971 | 17.7756 | 17.7395 | 17.6588 | 17.8527 | 18.218  | 18.1333 | 18.0672 |
| SUB1    | 21.2452 | 21.2391 | 21.0501 | 21.3659 | 20.6474 | 20.9317 | 20.4458 | 21.0694 | 21.2559 |
| SUCLA2  | 20.2319 | 20.3979 | 20.0958 | 19.9576 | 19.9773 | 20.18   | 20.4649 | 20.168  | 20.5125 |
| SUCLG1  | 20.5003 | 20.704  | 20.5574 | 20.5833 | 20.3647 | 20.5199 | 20.825  | 20.4649 | 20.7378 |
| SUCLG2  | 21.1855 | 20.9527 | 21.0581 | 20.7358 | 20.8444 | 20.895  | 21.0565 | 20.8406 | 20.8476 |
| SUGP1   | 16.9164 | 17.7515 | 17.6434 | 17.7365 | 17.3792 | 17.8046 | 18.0944 | 17.9722 | 17.9952 |
| SUGT1   | 21.5824 | 20.8086 | 21.218  | 21.1859 | 21.067  | 21.4267 | 21.1471 | 21.0126 | 21.2716 |
| SUMF2   | 18.9975 | 18.6866 | 18.9513 | 18.8853 | 18.7581 | 19.3153 | 19.1556 | 19.2386 | 19.3528 |
| SUN1    | 17.3532 | 17.2625 | 17.2387 | 16.9823 | 17.1109 | 16.6831 | 17.2272 | 16.8228 | 16.9038 |
| SUN2    | 19.577  | 19.2509 | 19.1623 | 19.5688 | 19.2005 | 18.9317 | 19.3406 | 19.6419 | 19.4177 |
| SUPT16H | 22.801  | 22.5654 | 22.3896 | 22.5426 | 22.4213 | 22.0856 | 22.702  | 22.4757 | 22.6193 |
| SUPT5H  | 20.4626 | 19.8552 | 19.5863 | 20.0833 | 19.4594 | 20.0617 | 20.1991 | 19.9433 | 19.9855 |
| SUPT6H  | 20.5766 | 20.5762 | 20.5829 | 20.4129 | 20.4369 | 20.494  | 20.1263 | 20.7543 | 20.4389 |
| SUPV3L1 | 18.2908 | 18.5504 | 18.8372 | 18.8618 | 18.4019 | 18.712  | 18.7953 | 18.6091 | 18.7418 |
| SURF4   | 20.2666 | 20.3542 | 19.9413 | 20.1593 | 20.0898 | 19.6471 | 19.6652 | 20.2101 | 20.2117 |
| SURF6   | 17.8202 | 17.7053 | 17.8396 | 18.0156 | 17.8558 | 17.9542 | 18.0691 | 17.631  | 17.9222 |
| SVIL    | 16.8974 | 16.8245 | 16.7058 | 16.4085 | 16.2546 | 15.8286 | 14.5393 | 15.5533 | 15.7685 |
| SYAP1   | 17.128  | 16.7895 | 17.3669 | 17.8775 | 17.5275 | 18.259  | 17.7922 | 17.6126 | 17.2587 |
| SYMPK   | 18.981  | 19.3559 | 18.7844 | 19.0554 | 19.4257 | 19.0693 | 19.7865 | 19.4023 | 19.3081 |
| SYNCRIP | 24.1253 | 23.8937 | 23.8514 | 23.8109 | 23.645  | 23.3832 | 23.5554 | 23.5089 | 23.4453 |
| SYNJ2BP | 18.7692 | 19.031  | 19.0916 | 19.0465 | 18.9098 | 19.3231 | 19.2381 | 19.0352 | 18.9167 |
| SYNM    | 21.8105 | 21.0118 | 21.007  | 20.9224 | 20.7828 | 20.6295 | 21.0933 | 20.5158 | 20.8016 |
| SYPL1   | 22.6552 | 22.4502 | 22.3348 | 22.3305 | 22.2405 | 21.9205 | 22.3102 | 21.9119 | 22.1455 |
| TAB1    | 17.4646 | 17.4548 | 17.8361 | 17.1685 | 17.7636 | 17.911  | 18.3087 | 17.7348 | 17.8549 |
| TACO1   | 19.4434 | 19.0366 | 19.3772 | 19.4014 | 19.1971 | 19.4586 | 19.7678 | 19.4153 | 19.3319 |
| TAF15   | 20.1674 | 19.6881 | 20.2409 | 19.5272 | 19.868  | 20.4626 | 21.0361 | 20.4254 | 20.3526 |
| TAF9B   | 18.2691 | 18.7714 | 18.57   | 18.5648 | 18.3491 | 18.321  | 18.5553 | 18.4377 | 18.5517 |
| TAGLN2  | 23.6493 | 23.5603 | 23.6674 | 23.7384 | 23.316  | 23.5883 | 23.5934 | 23.6326 | 23.9193 |
| TALDO1  | 24.0368 | 23.2519 | 23.8768 | 23.8246 | 23.7002 | 24.3074 | 24.4126 | 24.07   | 24.2048 |
| TAOK1   | 18.2129 | 17.7746 | 17.9324 | 17.448  | 17.4371 | 17.5689 | 18.2754 | 17.7529 | 17.938  |
| TAP1    | 19.0125 | 18.4827 | 18.4027 | 18.742  | 18.1893 | 19.1602 | 19.0181 | 19.5678 | 19.3376 |
| TAP2    | 17.5515 | 17.6221 | 17.4549 | 17.3914 | 17.2697 | 16.532  | 17.2536 | 17.3797 | 17.5236 |
| TAPBP   | 18.7229 | 14.6907 | 18.4946 | 18.4284 | 18.573  | 19.2479 | 19.0181 | 18.7558 | 19.1062 |
| TARDBP  | 21.7202 | 21.6254 | 21.4962 | 21.5947 | 21.4464 | 21.9514 | 21.9018 | 21.511  | 21.7899 |
| TARS    | 22.4866 | 22.1923 | 22.2654 | 22.231  | 22.0927 | 22.2287 | 22.4211 | 22.2986 | 22.3801 |
| TARS2   | 22.1911 | 19.9917 | 20.3048 | 19.8905 | 20.0531 | 20.0555 | 20.3608 | 19.7028 | 19.9022 |
| TBC1D15 | 19.4838 | 19.2315 | 19.32   | 19.1232 | 19.2469 | 19.0062 | 19.6082 | 19.2658 | 19.5184 |
| TBC1D5  | 18.877  | 18.4234 | 18.8892 | 18.8494 | 18.9045 | 18.9524 | 19.3441 | 18.8856 | 18.8296 |
| TBCA    | 19.3188 | 18.9477 | 19.11   | 19.506  | 19.188  | 19.6912 | 19.1645 | 18.9801 | 19.2761 |
| TBCB    | 19.5239 | 19.1784 | 19.3994 | 19.5487 | 19.628  | 19.6281 | 19.5983 | 19.7123 | 19.7452 |
| TBCD    | 19.8188 | 19.6116 | 19.8522 | 19.6628 | 19.4081 | 19.3919 | 19.8788 | 19.5978 | 19.7255 |
| TBCE    | 17.9797 | 17.8213 | 17.9374 | 18.6904 | 18.306  | 17.1206 | 17.7893 | 17.8233 | 17.9466 |
| TBK1    | 24.2239 | 24.4047 | 24.5831 | 24.2619 | 24.1581 | 23.9493 | 24.3495 | 24.1657 | 24.5583 |
| TBL1XR1 | 20.1363 | 20.0725 | 20.0759 | 20.0565 | 19.7714 | 20.0161 | 20.0982 | 20.1035 | 20.149  |
| TBL2    | 18.9401 | 18.6669 | 18.7336 | 18.6936 | 18.7918 | 18.8454 | 18.9873 | 19.0346 | 18.9836 |
| TBL3    | 19.993  | 19.8152 | 19.6906 | 19.3667 | 19.6216 | 19.3803 | 19.6939 | 19.7477 | 19.5838 |
| TBP     | 16.3725 | 17.0586 | 16.6153 | 16.9232 | 16.9576 | 16.729  | 16.8632 | 16.4975 | 16.5317 |
| TBRG4   | 20.0579 | 19.5206 | 19.2423 | 19.1367 | 19.3797 | 19.4339 | 19.5676 | 19.3151 | 19.3942 |
| TCEA1   | 21.3216 | 20.9313 | 21.2401 | 21.2372 | 21.0474 | 21.2893 | 21.2904 | 20.9683 | 21.2825 |
| TCEB1   | 21.0605 | 19.1925 | 20.9978 | 21.5473 | 21.2607 | 21.4223 | 21.2132 | 21.0211 | 21.3022 |
| TCEB2   | 20.8312 | 19.7948 | 20.7225 | 20.7171 | 20.6195 | 20.9952 | 21.1956 | 21.0526 | 21.1493 |
| TCERG1  | 20.8906 | 20.6813 | 20.7654 | 20.4866 | 20.5377 | 20.8864 | 21.2502 | 20.7263 | 20.9133 |
| TCOF1   | 19.4231 | 19.3449 | 19.1165 | 19.4388 | 19.0751 | 19.6796 | 19.6727 | 19.4129 | 19.5844 |

|          |         |         |         |         |         |         |         |         |         |
|----------|---------|---------|---------|---------|---------|---------|---------|---------|---------|
| TCP1     | 23.8546 | 23.7604 | 23.6963 | 23.5376 | 23.3899 | 23.5166 | 23.8821 | 23.5747 | 23.6354 |
| TECR     | 20.9752 | 20.4305 | 20.8658 | 20.4885 | 20.7364 | 20.3445 | 21.2365 | 20.7608 | 20.8794 |
| TELO2    | 17.5795 | 17.5677 | 17.8651 | 17.4716 | 17.8948 | 17.419  | 17.8356 | 17.6483 | 17.4732 |
| TEX10    | 17.7943 | 17.8918 | 17.8445 | 17.5754 | 17.6271 | 16.729  | 17.9706 | 17.5893 | 17.4576 |
| TEX264   | 18.2871 | 16.1907 | 18.4035 | 18.4896 | 18.0534 | 18.5454 | 18.8419 | 18.4296 | 18.7909 |
| TFAP2A   | 17.4238 | 14.9517 | 17.3078 | 16.5326 | 17.4347 | 16.0767 | 16.5343 | 16.1336 | 14.9515 |
| TFB1M    | 15.4911 | 16.3758 | 16.6085 | 16.7983 | 16.4422 | 16.2159 | 16.8742 | 16.3048 | 16.1713 |
| TFB2M    | 19.3756 | 19.3115 | 19.6645 | 19.247  | 19.191  | 19.6941 | 19.5052 | 18.9645 | 19.0075 |
| TFCP2    | 19.034  | 18.7263 | 19.0336 | 18.9685 | 18.8112 | 18.8651 | 18.9473 | 19.0922 | 18.9303 |
| TFG      | 21.0017 | 20.5413 | 20.9524 | 21.2482 | 21.037  | 20.9867 | 21.5174 | 20.857  | 21.2114 |
| TFRC     | 23.0409 | 23.0439 | 22.9534 | 22.9129 | 22.7264 | 23.1207 | 23.4362 | 23.1846 | 23.2804 |
| TGM2     | 21.139  | 20.8833 | 21.0875 | 21.0062 | 20.9102 | 20.1876 | 20.4566 | 20.2797 | 20.2998 |
| TGOLN2   | 17.5664 | 17.6328 | 17.2075 | 17.1693 | 17.1149 | 17.0193 | 17.0803 | 17.0588 | 17.3679 |
| THBS2    | 18.5668 | 19.097  | 18.5832 | 18.5144 | 18.6315 | 19.0888 | 19.215  | 18.8066 | 19.0756 |
| THEM4    | 18.7415 | 18.6228 | 18.7953 | 18.7052 | 18.6441 | 18.7027 | 18.7394 | 18.5354 | 18.2585 |
| THEM6    | 20.0232 | 19.7233 | 19.557  | 19.1865 | 19.2057 | 19.6696 | 19.7281 | 19.5167 | 19.9153 |
| THOC1    | 18.0417 | 18.3607 | 18.1412 | 18.1812 | 18.1507 | 18.3233 | 18.7563 | 18.5831 | 18.385  |
| THOC2    | 18.0326 | 18.2428 | 17.9573 | 17.8226 | 18.149  | 17.6113 | 18.282  | 18.0368 | 17.8696 |
| THOC3    | 18.0057 | 18.5201 | 18.3375 | 18.3984 | 17.758  | 17.9574 | 17.4705 | 18.0411 | 17.8621 |
| THOC5    | 20.3097 | 19.5768 | 18.9782 | 19.0263 | 18.8914 | 19.2526 | 19.0943 | 19.3253 | 19.5623 |
| THOC6    | 18.6264 | 18.2441 | 18.2418 | 18.0972 | 17.9943 | 18.3204 | 18.4253 | 18.0675 | 17.8251 |
| THOP1    | 22.4869 | 22.6425 | 22.8337 | 22.3857 | 22.3581 | 22.4439 | 22.6389 | 22.4869 | 22.6973 |
| THRAP3   | 21.0943 | 20.4995 | 21.2416 | 21.2817 | 21.1891 | 21.3889 | 21.1416 | 21.0895 | 21.4994 |
| THUMPD1  | 18.6773 | 18.5171 | 18.5265 | 18.5128 | 18.4974 | 18.454  | 18.6144 | 18.4939 | 18.6124 |
| THUMPD3  | 19.303  | 19.2716 | 19.3877 | 19.1661 | 19.1261 | 19.1388 | 19.7089 | 19.2712 | 19.1718 |
| THYN1    | 17.9561 | 18.0939 | 18.2702 | 18.0811 | 17.8496 | 18.2628 | 18.6239 | 18.2781 | 18.3885 |
| TIA1     | 16.3843 | 15.4337 | 16.8505 | 11.7288 | 15.3752 | 16.2662 | 17.7517 | 16.5515 | 16.0946 |
| TIAL1    | 21.1054 | 20.1758 | 20.9866 | 20.9035 | 20.9804 | 21.3249 | 21.5617 | 20.9416 | 21.0544 |
| TIGAR    | 20.4854 | 20.4036 | 20.0705 | 20.3534 | 20.1098 | 20.0231 | 20.1319 | 20.257  | 20.3738 |
| TIMM44   | 21.2459 | 21.0492 | 20.9364 | 20.8054 | 20.7544 | 20.7684 | 20.9067 | 20.8956 | 21.0075 |
| TIMM50   | 20.8656 | 20.4652 | 20.3745 | 20.5235 | 20.4697 | 20.8338 | 20.857  | 20.8601 | 20.6086 |
| TIMMDC1  | 16.4731 | 16.7699 | 16.5318 | 16.7389 | 16.9694 | 15.9386 | 15.2187 | 16.595  | 16.259  |
| TIMP3    | 20.465  | 20.0643 | 20.0254 | 19.9158 | 19.7506 | 19.8978 | 20.2402 | 20.1811 | 19.9898 |
| TIPRL    | 20.534  | 20.4817 | 20.3457 | 20.419  | 20.26   | 20.3659 | 20.4731 | 20.2139 | 20.2869 |
| TJP1     | 19.4806 | 19.2356 | 19.2596 | 19.2649 | 19.3726 | 18.6459 | 19.7006 | 19.3832 | 19.6342 |
| TJP2     | 19.5536 | 19.5874 | 19.5383 | 19.3009 | 19.1052 | 19.1913 | 19.2549 | 19.3145 | 19.4222 |
| TK1      | 20.1495 | 19.8328 | 19.8382 | 19.9218 | 19.8619 | 19.6794 | 19.7405 | 19.9    | 19.662  |
| TKT      | 25.7838 | 25.6407 | 25.5826 | 25.5389 | 25.3107 | 25.7856 | 26.0546 | 25.7632 | 26.1088 |
| TLE3     | 19.1899 | 18.8625 | 19.0089 | 19.0918 | 18.9771 | 18.9962 | 19.3798 | 19.1091 | 19.3738 |
| TLN1     | 21.5427 | 21.713  | 21.6761 | 21.6844 | 21.5911 | 21.1174 | 21.7653 | 21.5486 | 21.6976 |
| TM9SF1   | 19.4894 | 19.3109 | 19.3854 | 19.211  | 19.0798 | 19.1433 | 19.425  | 19.3909 | 19.5769 |
| TM9SF2   | 21.0538 | 20.7182 | 20.8917 | 20.9995 | 20.9354 | 20.7599 | 20.8895 | 20.9614 | 20.9762 |
| TM9SF3   | 21.2414 | 20.9661 | 21.0411 | 21.1113 | 21.1308 | 20.8471 | 21.3242 | 20.9765 | 21.2322 |
| TM9SF4   | 21.7784 | 21.422  | 21.1841 | 21.565  | 21.1928 | 21.0635 | 20.9834 | 21.2431 | 21.3135 |
| TMCO1    | 20.758  | 21.2337 | 20.538  | 20.6434 | 20.4146 | 20.6227 | 20.7543 | 20.6374 | 20.4939 |
| TMED10   | 21.9173 | 22.0427 | 22.0551 | 22.0417 | 22.0062 | 22.3341 | 22.2398 | 22.1264 | 22.2724 |
| TMED2    | 20.3568 | 18.805  | 20.2201 | 20.4203 | 20.1022 | 20.569  | 20.5117 | 20.4122 | 20.8403 |
| TMED7    | 21.9326 | 21.3962 | 21.3296 | 21.5378 | 21.1895 | 21.3242 | 21.5083 | 21.4696 | 21.6625 |
| TMED9    | 20.775  | 20.5007 | 20.5523 | 21.0737 | 20.5168 | 20.9905 | 21.0676 | 21.0332 | 21.0999 |
| TMEM14C  | 18.4096 | 18.4568 | 18.0414 | 18.3176 | 18.1672 | 16.7682 | 16.644  | 18.0138 | 17.862  |
| TMEM165  | 20.3822 | 19.9937 | 19.7216 | 20.2091 | 19.8294 | 20.0426 | 19.5817 | 20.0688 | 20.1565 |
| TMEM167A | 20.8264 | 21.131  | 21.3728 | 21.0215 | 20.7676 | 20.7728 | 21.1484 | 20.7739 | 20.9217 |
| TMEM189  | 19.093  | 19.1063 | 19.2526 | 18.9441 | 19.3803 | 19.2697 | 19.6264 | 19.5662 | 19.1964 |
| TMEM2    | 21.0521 | 21.277  | 21.2216 | 21.1205 | 21.2935 | 21.2154 | 21.5919 | 21.038  | 21.2119 |
| TMEM223  | 14.1673 | ?       | 14.485  | 15.3678 | 15.9034 | 15.4639 | 16.0756 | 15.1161 | 15.9549 |
| TMEM33   | 20.6373 | 20.4598 | 20.9314 | 20.9277 | 20.6155 | 20.3709 | 20.7537 | 20.5533 | 20.5361 |

|          |         |         |         |         |         |         |         |         |         |
|----------|---------|---------|---------|---------|---------|---------|---------|---------|---------|
| TMEM43   | 21.5237 | 21.53   | 21.4057 | 21.5884 | 21.4109 | 21.3501 | 21.5642 | 21.2648 | 21.4051 |
| TMEM87A  | 17.566  | 17.829  | 17.8113 | 17.4879 | 17.994  | 14.6528 | 15.0826 | 15.7645 | 14.7015 |
| TMEM97   | 18.4381 | 18.8306 | 18.6079 | 18.3654 | 18.6697 | 18.904  | 19.5147 | 18.7703 | 19.0332 |
| TMOD3    | 20.8818 | 20.7719 | 20.742  | 20.6782 | 20.7    | 20.9036 | 21.3285 | 20.7897 | 20.9395 |
| TMPO     | 21.9721 | 21.8233 | 21.9038 | 22.0551 | 21.8517 | 22.0132 | 22.4452 | 21.8017 | 22.0783 |
| TMPO     | 21.7869 | 22.0363 | 21.9314 | 21.8608 | 21.508  | 21.7254 | 21.7117 | 21.7807 | 22.0154 |
| TMX1     | 21.4703 | 20.9065 | 21.5496 | 21.5999 | 21.2777 | 21.3725 | 21.5151 | 21.1356 | 21.32   |
| TMX2     | 18.2755 | 18.037  | 18.3813 | 18.3979 | 18.0518 | 18.2333 | 18.2165 | 18.1499 | 18.1689 |
| TMX3     | 19.0807 | 18.9288 | 18.8143 | 18.7971 | 18.9125 | 18.3736 | 18.1631 | 19.0531 | 19.1239 |
| TMX4     | 18.9956 | 19.3102 | 19.2677 | 19.0032 | 19.0203 | 18.8387 | 18.8318 | 18.9671 | 19.0722 |
| TNC      | 19.0605 | 19.0553 | 18.5056 | 18.6381 | 18.8703 | 19.0189 | 19.8692 | 19.4455 | 19.7457 |
| TNFAIP8  | 15.8739 | 16.3464 | 16.1741 | 16.2416 | 16.3702 | 15.2086 | 15.5675 | 16.2222 | 16.0872 |
| TNKS1BP1 | 15.6486 | 15.7648 | 16.6725 | 16.6433 | 16.3646 | 17.7042 | 17.7361 | 17.002  | 17.0042 |
| TNPO1    | 22.741  | 22.6569 | 22.6744 | 22.5136 | 22.5725 | 22.4883 | 22.9691 | 22.4161 | 22.5525 |
| TNPO2    | 19.1112 | 19.1505 | 19.1834 | 19.2648 | 18.7376 | 18.8848 | 18.3186 | 18.7424 | 19.0466 |
| TNPO3    | 20.3398 | 20.8032 | 20.5705 | 20.4455 | 20.6322 | 20.4845 | 20.8878 | 20.6666 | 20.6562 |
| TNS3     | 20.5039 | 19.9535 | 20.518  | 20.7931 | 20.6959 | 20.9199 | 20.9438 | 20.6378 | 20.9709 |
| TOE1     | 18.7868 | 19.2295 | 19.5608 | 19.7108 | 19.4084 | 19.5014 | 19.4512 | 18.7196 | 19.3049 |
| TOMM20   | 20.3888 | 20.515  | 20.5916 | 20.2741 | 20.5052 | 20.611  | 20.5514 | 20.3284 | 20.2532 |
| TOMM22   | 21.0699 | 20.6179 | 21.1604 | 20.819  | 20.9002 | 20.8252 | 21.0952 | 20.8892 | 21.1452 |
| TOMM34   | 22.2569 | 21.9824 | 22.0432 | 21.8125 | 21.6012 | 21.9484 | 22.2224 | 21.8158 | 21.7895 |
| TOMM40   | 22.0716 | 21.7729 | 21.5786 | 21.7463 | 21.5836 | 21.4865 | 21.7425 | 21.724  | 21.892  |
| TOMM70A  | 21.4409 | 20.3685 | 20.989  | 21.1847 | 20.8711 | 21.147  | 21.238  | 20.944  | 21.2819 |
| TOP1     | 19.0094 | 19.4473 | 19.505  | 19.0127 | 18.9423 | 19.2253 | 19.721  | 19.3536 | 19.2806 |
| TOP2A    | 19.3043 | 19.6451 | 19.4429 | 19.4501 | 19.2129 | 19.294  | 19.4955 | 19.5255 | 19.944  |
| TOP2B    | 18.2442 | 18.5403 | 18.4682 | 18.3678 | 18.331  | 17.7688 | 18.3006 | 18.3244 | 18.2567 |
| TOR1A    | 18.4921 | 18.2199 | 17.9321 | 17.575  | 17.9293 | 16.9711 | 17.6664 | 17.8239 | 17.2087 |
| TOR1AIP1 | 21.8002 | 21.8356 | 21.6022 | 21.6717 | 21.5799 | 21.6046 | 21.6244 | 21.8265 | 22.0096 |
| TOR1B    | 17.9762 | 17.1045 | 17.5064 | 17.7631 | 17.4412 | 16.6684 | 16.9785 | 16.2383 | 16.5981 |
| TP53BP1  | 19.1729 | 18.844  | 18.6166 | 18.7877 | 18.831  | 19.1921 | 19.3018 | 18.9967 | 19.2365 |
| TP53RK   | 18.3307 | 17.9898 | 17.9211 | 17.7726 | 17.9618 | 18.1333 | 17.9598 | 17.979  | 17.854  |
| TPBG     | 17.5335 | 17.9991 | 17.9695 | 17.7959 | 17.7245 | 17.3696 | 17.7669 | 17.6034 | 17.8224 |
| TPD52    | 19.9393 | 19.7851 | 19.5411 | 19.7809 | 19.5886 | 18.9091 | 18.6712 | 19.3879 | 19.5068 |
| TPD52L2  | 22.3882 | 22.2143 | 22.1238 | 22.1744 | 21.9025 | 21.9186 | 22.0439 | 21.9269 | 22.1508 |
| TP11     | 25.7364 | 25.3242 | 25.4789 | 25.5532 | 25.321  | 25.6377 | 25.5976 | 25.7187 | 25.6415 |
| TPM1     | 19.886  | 19.5201 | 19.7841 | 20.2139 | 19.9197 | 19.5125 | 19.542  | 19.273  | 19.6455 |
| TPM3     | 22.1206 | 21.4355 | 22.1589 | 22.5648 | 22.2064 | 22.1066 | 21.8688 | 21.8756 | 22.1704 |
| TPM4     | 19.91   | 19.1276 | 19.7115 | 19.8944 | 19.4969 | 19.8812 | 19.9818 | 19.5903 | 20.1397 |
| TPP1     | 21.1215 | 21.4991 | 21.5476 | 21.4149 | 21.2128 | 21.3086 | 21.7792 | 21.407  | 21.5432 |
| TPP2     | 18.7846 | 19.6348 | 19.547  | 20.1335 | 19.4796 | 19.9986 | 20.0195 | 19.7961 | 20.2669 |
| TPR      | 22.0789 | 21.5708 | 21.6307 | 21.809  | 21.608  | 21.9976 | 22.0491 | 21.7317 | 21.8688 |
| TPRKB    | 18.1382 | 18.2636 | 17.9989 | 17.9482 | 17.7138 | 18.0426 | 18.3057 | 17.9651 | 18.0157 |
| TPT1     | 23.6329 | 23.3773 | 23.4279 | 23.6322 | 23.2834 | 23.5056 | 23.2634 | 23.2788 | 23.3726 |
| TRA2A    | 20.6848 | 20.8254 | 20.6922 | 20.8337 | 20.7976 | 20.665  | 20.9542 | 20.7679 | 20.8478 |
| TRA2B    | 22.3508 | 22.0093 | 22.277  | 22.4117 | 22.4771 | 22.3798 | 22.2614 | 22.3101 | 22.2687 |
| TRAP1    | 22.2522 | 22.2099 | 22.1698 | 22.0748 | 21.9748 | 22.1006 | 22.5547 | 22.233  | 22.5127 |
| TRAPPC3  | 19.9055 | 20.1238 | 20.4289 | 19.9158 | 20.2515 | 20.7839 | 20.0585 | 20.0701 | 19.9352 |
| TRIM24   | 17.9272 | 17.785  | 17.8714 | 17.31   | 17.4453 | 17.681  | 18.0485 | 17.4707 | 17.7297 |
| TRIM25   | 21.5676 | 21.4386 | 21.4175 | 21.3268 | 21.4173 | 21.2929 | 21.5092 | 21.2893 | 21.4108 |
| TRIM26   | 15.7332 | 16.2069 | 16.4205 | 16.0282 | 16.3839 | 16.666  | 16.6237 | 16.5383 | 16.6124 |
| TRIM28   | 24.0608 | 23.6478 | 23.5866 | 23.7352 | 23.4282 | 23.4407 | 23.5028 | 23.6998 | 23.9538 |
| TRIM47   | 19.1903 | 18.4461 | 19.1607 | 19.3046 | 18.9099 | 19.8209 | 20.0119 | 19.5533 | 19.7957 |
| TRIM56   | 16.572  | 16.7754 | 17.2817 | 17.144  | 16.8767 | 16.9939 | 17.3302 | 17.0418 | 17.3934 |
| TRIO     | 16.6736 | 16.5149 | 16.679  | 16.1789 | 16.7379 | 16.6929 | 17.308  | 17.117  | 16.77   |
| TRIOBP   | 18.1834 | 17.3343 | 18.4561 | 18.5902 | 18.4611 | 18.339  | 18.7272 | 18.1952 | 18.4308 |
| TRIP10   | 16.6768 | 17.9914 | 19.267  | 17.7521 | 19.4751 | 16.4196 | 17.4255 | 17.4226 | 18.2753 |

|         |         |         |         |         |         |         |         |         |         |
|---------|---------|---------|---------|---------|---------|---------|---------|---------|---------|
| TRIP12  | 18.8926 | 18.841  | 18.6871 | 18.6334 | 18.5796 | 18.8185 | 19.2059 | 18.6036 | 18.8762 |
| TRIP13  | 20.8827 | 20.6955 | 20.9106 | 20.8947 | 20.8789 | 20.9928 | 21.2453 | 20.7677 | 20.9548 |
| TRIP6   | 20.8532 | 20.7098 | 20.8693 | 20.5419 | 20.5627 | 20.5205 | 20.6303 | 20.5824 | 20.7859 |
| TRMT1   | 17.3746 | 17.6227 | 17.7004 | 17.5954 | 17.5829 | 17.2364 | 17.4518 | 17.6154 | 17.4979 |
| TRMT10C | 19.2064 | 19.1955 | 19.2667 | 19.0067 | 19.0622 | 19.3487 | 19.6126 | 19.4329 | 19.2915 |
| TRMT112 | 20.9822 | 20.9139 | 20.9345 | 20.9661 | 20.7942 | 21.0048 | 21.223  | 20.8535 | 21.064  |
| TRMT1L  | 15.9105 | 15.6365 | 15.5901 | 15.6551 | 15.5597 | 14.9249 | 15.143  | 16.1022 | 15.5304 |
| TRMT6   | 17.7114 | 17.8821 | 17.6761 | 17.5336 | 17.5535 | 18.5206 | 18.2454 | 17.5707 | 17.5799 |
| TRNT1   | 19.2117 | 18.8733 | 19.1737 | 19.0282 | 18.8274 | 19.1565 | 19.4436 | 19.1163 | 19.4096 |
| TROVE2  | 20.1293 | 19.7289 | 20.0056 | 20.2201 | 20.159  | 20.0369 | 19.807  | 20.0967 | 20.04   |
| TRRAP   | 17.0359 | 17.178  | 17.3488 | 17.0881 | 17.1368 | 17.0143 | 17.7299 | 17.4885 | 17.689  |
| TSFM    | 20.2306 | 20.146  | 19.8344 | 19.9973 | 19.8389 | 20.038  | 20.1372 | 20.0148 | 20.253  |
| TSG101  | 20.0031 | 20.0346 | 20.0645 | 19.7835 | 19.8542 | 19.6811 | 20.0938 | 19.8422 | 20.0197 |
| TSN     | 21.7945 | 21.6419 | 21.5389 | 21.2712 | 21.4252 | 21.5071 | 21.7992 | 21.4246 | 21.4265 |
| TSNAX   | 19.0646 | 19.2343 | 18.8631 | 18.596  | 18.9645 | 17.9236 | 18.389  | 18.7705 | 18.6328 |
| TSR1    | 20.204  | 19.9296 | 20.1095 | 20.06   | 19.8295 | 19.6819 | 20.055  | 19.7903 | 19.9665 |
| TSSC4   | 16.8065 | 17.3196 | 17.3709 | 17.7489 | 17.3332 | 17.3086 | 17.9598 | 17.2177 | 17.9342 |
| TSTA3   | 17.1251 | 16.6918 | 16.7379 | 16.7768 | 16.5985 | 16.3578 | 15.4746 | 16.4269 | 16.3748 |
| TTC1    | 17.5014 | 17.3708 | 17.4498 | 17.6868 | 17.2619 | 17.9252 | 17.7663 | 17.4031 | 18.0265 |
| TTC37   | 17.7994 | 17.6184 | 18.1582 | 17.8017 | 17.7376 | 17.6687 | 18.0718 | 18.0389 | 17.8285 |
| TTC4    | 19.7869 | 19.7011 | 20.1193 | 19.6862 | 19.7534 | 19.7886 | 19.8365 | 19.8293 | 19.8164 |
| TTI1    | 19.9563 | 20.8602 | 20.1603 | 20.8746 | 20.2545 | 19.9966 | 20.4988 | 20.2704 | 20.6322 |
| TTI2    | 16.7502 | 17.7967 | 17.861  | 17.8643 | 17.4845 | 17.5301 | 17.3684 | 17.7029 | 17.2216 |
| TTLL12  | 21.8079 | 21.4749 | 21.3889 | 21.3187 | 21.2442 | 21.3821 | 21.1873 | 21.3541 | 21.3574 |
| TUBA1B  | 25.2463 | 24.9523 | 24.8708 | 25.0274 | 24.5336 | 24.8832 | 24.8092 | 25.273  | 25.1265 |
| TUBA1C  | 23.6011 | 23.196  | 23.2881 | 23.4428 | 23.0527 | 23.4686 | 22.5696 | 23.4105 | 23.1301 |
| TUBA3C  | 21.0532 | 21.1779 | 21.383  | 20.8348 | 20.9636 | 19.5643 | 20.4854 | 20.5811 | 20.3671 |
| TUBB    | 26.2944 | 25.9179 | 25.9113 | 25.9273 | 25.9424 | 26.0866 | 26.3053 | 26.124  | 25.8371 |
| TUBB2B  | 22.2662 | 20.9745 | 22.0284 | 22.0071 | 21.8281 | 21.9621 | 21.7301 | 21.8605 | 21.8555 |
| TUBB3   | 22.5606 | 22.6383 | 22.4347 | 22.4387 | 22.2403 | 22.538  | 22.3264 | 22.1105 | 22.7224 |
| TUBB6   | 21.2994 | 21.1725 | 21.1195 | 21.2298 | 20.9989 | 21.3783 | 20.6574 | 21.0756 | 21.6372 |
| TUBG1   | 20.7057 | 20.507  | 20.5336 | 20.4149 | 20.3253 | 20.5695 | 20.6046 | 20.562  | 20.3157 |
| TUBGCP2 | 18.1832 | 18.0693 | 17.9081 | 18.0946 | 17.987  | 17.9581 | 18.3567 | 18.1114 | 18.1774 |
| TUBGCP3 | 18.643  | 19.0637 | 18.9361 | 18.5957 | 19.4293 | 18.7877 | 20.1969 | 19.4403 | 19.1415 |
| TUFM    | 23.6672 | 23.7315 | 23.757  | 23.5946 | 23.4188 | 23.4932 | 23.7102 | 23.4252 | 23.7115 |
| TWF1    | 20.3274 | 20.7403 | 20.5485 | 20.3406 | 20.6051 | 20.6559 | 20.7926 | 20.442  | 20.1119 |
| TWF2    | 21.5604 | 21.265  | 21.3541 | 21.4144 | 21.3913 | 21.4363 | 21.236  | 21.3263 | 21.3857 |
| TXLNA   | 21.1906 | 20.8361 | 21.0498 | 21.2921 | 21.3269 | 21.1314 | 21.258  | 21.0939 | 21.179  |
| TXLNG   | 17.3652 | 17.8326 | 18.0634 | 17.9286 | 17.991  | 17.9149 | 17.6557 | 17.3215 | 18.2099 |
| TXN     | 23.3049 | 23.4861 | 23.1899 | 23.7308 | 23.0845 | 23.4226 | 22.6165 | 23.5344 | 23.6652 |
| TXNDC17 | 21.4041 | 21.5758 | 21.7939 | 21.7636 | 21.6007 | 21.8706 | 21.8954 | 21.5544 | 21.6918 |
| TXNDC5  | 22.5634 | 22.7296 | 22.6228 | 22.6114 | 22.5995 | 22.7811 | 22.7134 | 22.723  | 22.8301 |
| TXNDC9  | 19.0518 | 18.8594 | 19.112  | 19.0963 | 19.078  | 18.8281 | 18.987  | 18.8941 | 19.1363 |
| TXNL1   | 22.75   | 22.7067 | 22.6686 | 22.6968 | 22.457  | 22.7729 | 22.9045 | 22.7323 | 23.0102 |
| TXNRD1  | 22.3826 | 21.977  | 22.0652 | 22.1602 | 22.1988 | 22.5424 | 22.5976 | 22.3806 | 22.3091 |
| TYMS    | 20.707  | 20.8547 | 20.8462 | 20.6743 | 20.6432 | 20.6131 | 20.8451 | 20.6331 | 20.3991 |
| U2AF1   | 21.8344 | 20.6414 | 21.642  | 21.8111 | 21.7683 | 21.9455 | 21.9089 | 21.5562 | 21.5216 |
| U2AF2   | 23.305  | 23.2101 | 23.151  | 23.21   | 23.0597 | 22.9803 | 23.3531 | 23.1279 | 23.3755 |
| U2SURP  | 20.9538 | 21.5528 | 21.1234 | 20.9913 | 21.0238 | 20.9716 | 21.1886 | 20.9377 | 20.9907 |
| UACA    | 16.6093 | 17.1103 | 17.2905 | 16.9869 | 16.827  | 16.9261 | 17.3194 | 17.0787 | 16.9834 |
| UAP1    | 21.7732 | 21.598  | 21.658  | 21.5035 | 21.1443 | 21.0752 | 20.9676 | 21.1997 | 21.4417 |
| UAP1L1  | 18.4826 | 18.2612 | 18.4401 | 18.669  | 18.3192 | 18.245  | 18.6392 | 18.4125 | 18.3536 |
| UBA1    | 23.8981 | 23.8636 | 24.139  | 23.7914 | 23.7283 | 23.895  | 24.4658 | 24.0716 | 24.1506 |
| UBA2    | 21.3676 | 21.618  | 21.5078 | 21.3419 | 21.3313 | 21.135  | 21.6282 | 21.2421 | 21.3474 |
| UBA3    | 20.7933 | 20.669  | 20.6325 | 20.5203 | 20.3489 | 20.4713 | 20.4806 | 20.4827 | 20.7089 |
| UBA5    | 17.4706 | 16.4338 | 16.9499 | 17.0095 | 17.0251 | 17.4357 | 17.6554 | 17.0941 | 17.503  |

|         |         |         |         |         |         |         |         |         |         |
|---------|---------|---------|---------|---------|---------|---------|---------|---------|---------|
| UBA6    | 19.7678 | 19.6489 | 19.9265 | 19.7157 | 19.6361 | 19.5265 | 20.0374 | 19.7312 | 19.7084 |
| UBAP2L  | 20.8206 | 20.3044 | 20.7936 | 20.8104 | 20.7849 | 20.8138 | 20.8561 | 20.3864 | 20.7595 |
| UBASH3B | 18.9365 | 18.9783 | 19.1433 | 19.1507 | 19.0055 | 18.8745 | 19.0526 | 19.1419 | 19.1004 |
| UBE2C   | 20.8669 | 20.5676 | 20.516  | 20.5036 | 20.2669 | 20.3401 | 20.4134 | 20.3842 | 20.3071 |
| UBE2D3  | 22.1134 | 22.1275 | 22.3629 | 22.0833 | 21.869  | 22.241  | 22.4753 | 22.2165 | 22.4229 |
| UBE2H   | 19.6545 | 19.6832 | 19.7077 | 19.7691 | 19.6091 | 19.967  | 19.931  | 19.739  | 19.7793 |
| UBE2I   | 21.2855 | 21      | 21.1259 | 21.1838 | 20.9587 | 21.4008 | 21.4977 | 21.2194 | 21.2993 |
| UBE2K   | 22.0189 | 21.8157 | 21.9515 | 21.8143 | 21.6751 | 21.8543 | 22.0813 | 21.812  | 22.0651 |
| UBE2L3  | 23.0968 | 22.8718 | 22.926  | 23.108  | 22.9094 | 23.1599 | 23.2357 | 22.8959 | 22.9932 |
| UBE2M   | 22.2303 | 22.287  | 22.2587 | 22.2005 | 21.9305 | 22.1747 | 22.462  | 22.1638 | 22.2689 |
| UBE2N   | 23.3058 | 23.1941 | 23.2161 | 23.1735 | 22.9967 | 23.3246 | 23.3125 | 23.1857 | 23.2007 |
| UBE2O   | 19.937  | 19.4364 | 20.161  | 20.1956 | 19.9141 | 20.3334 | 20.5165 | 20.0087 | 20.2758 |
| UBE2S   | 18.8928 | 18.6758 | 18.5317 | 18.8161 | 18.4559 | 18.7685 | 18.7378 | 18.3759 | 18.1131 |
| UBE2T   | 20.9287 | 20.9475 | 20.8277 | 20.802  | 20.489  | 20.553  | 20.3527 | 20.6703 | 20.9031 |
| UBE2V2  | 22.8161 | 22.8152 | 23.2474 | 23.1207 | 23.0337 | 23.2166 | 23.1065 | 23.0248 | 23.2228 |
| UBE3A   | 17.6988 | 17.6503 | 17.5835 | 17.3777 | 17.6534 | 17.4447 | 16.9924 | 17.345  | 16.7777 |
| UBE4A   | 18.4562 | 18.701  | 18.3751 | 18.2088 | 18.0226 | 17.8116 | 18.2095 | 17.9905 | 18.2741 |
| UBFD1   | 18.5892 | 18.745  | 18.8304 | 19.0452 | 18.631  | 18.3087 | 17.8772 | 18.0914 | 18.2741 |
| UBLCP1  | 18.8048 | 18.9049 | 19.083  | 18.7783 | 18.5379 | 18.0969 | 18.3037 | 18.5128 | 18.9308 |
| UBQLN4  | 18.3947 | 18.2807 | 18.3964 | 18.4394 | 18.0849 | 18.4351 | 18.6963 | 18.0181 | 18.5565 |
| UBR1    | 17.0315 | 17.401  | 17.228  | 17.061  | 17.2988 | 16.358  | 16.7211 | 16.6908 | 16.4071 |
| UBR4    | 20.0872 | 19.8774 | 19.9288 | 19.9    | 19.8753 | 20.0938 | 20.3179 | 20.1066 | 20.2095 |
| UBR5    | 16.5753 | 16.4865 | 16.5914 | 16.4496 | 16.6682 | 16.749  | 16.6782 | 16.7938 | 16.442  |
| UBR7    | 20.822  | 20.6611 | 19.0697 | 19.2493 | 20.6526 | 20.2598 | 19.5406 | 18.99   | 19.0319 |
| UBTF    | 19.8318 | 19.8307 | 19.9931 | 19.8881 | 19.9102 | 19.8679 | 19.7574 | 19.7903 | 19.717  |
| UBXN1   | 19.7367 | 19.465  | 19.2055 | 19.915  | 19.4239 | 19.6009 | 19.3199 | 19.1373 | 19.6093 |
| UCHL1   | 22.4168 | 22.2206 | 22.3329 | 22.6878 | 22.3297 | 22.7583 | 22.5684 | 22.4737 | 22.8346 |
| UCHL3   | 18.0903 | 18.0885 | 18.2887 | 18.2825 | 17.712  | 18.4691 | 18.0417 | 18.1237 | 18.6777 |
| UCHL5   | 23.0088 | 22.974  | 22.7099 | 22.3832 | 22.4449 | 22.1555 | 22.3831 | 22.4189 | 22.7694 |
| UCK2    | 20.5185 | 19.9746 | 19.8783 | 20.1028 | 19.8496 | 20.2616 | 20.2992 | 20.3185 | 20.0687 |
| UFC1    | 19.5294 | 19.4026 | 19.5218 | 19.2958 | 19.3612 | 19.5175 | 19.6931 | 19.1438 | 19.3183 |
| UFD1L   | 21.6562 | 21.5041 | 21.5425 | 21.4638 | 21.2333 | 21.5843 | 21.6612 | 21.55   | 21.7931 |
| UFL1    | 16.7    | 15.9241 | 15.577  | 15.7816 | 16.9742 | 14.8529 | 15.0455 | 16.754  | 15.0357 |
| UGDH    | 20.9965 | 20.0138 | 20.481  | 20.3419 | 20.4389 | 20.9161 | 21.2308 | 20.9708 | 20.9209 |
| UGGT1   | 21.7093 | 21.9991 | 21.4557 | 21.7277 | 21.5342 | 21.391  | 21.6893 | 21.4469 | 21.7752 |
| UGP2    | 22.9946 | 23.1493 | 22.9687 | 23.0223 | 22.7301 | 23.2842 | 23.6874 | 23.3763 | 23.548  |
| UGT8    | 18.1809 | 18.2598 | 18.264  | 17.9801 | 18.1791 | 17.8398 | 18.0869 | 18.2369 | 18.048  |
| UHRF1   | 20.7626 | 20.3581 | 20.2701 | 20.2555 | 20.2314 | 20.023  | 20.3772 | 20.2937 | 20.0705 |
| UMPS    | 20.7801 | 20.4198 | 20.5195 | 20.3127 | 20.3833 | 20.3774 | 20.8481 | 20.5475 | 20.4746 |
| UNC119B | 18.2603 | 17.7811 | 18.0237 | 18.0889 | 17.7173 | 18.0059 | 18.4196 | 18.1349 | 17.8129 |
| UNC45A  | 20.3062 | 20.2469 | 20.4678 | 20.1009 | 20.1069 | 20.1308 | 20.5636 | 20.2138 | 20.3303 |
| UNG     | 20.2752 | 20.2854 | 20.117  | 20.149  | 20.0393 | 20.2238 | 19.8336 | 19.6443 | 20.1178 |
| UPF1    | 21.8083 | 21.3438 | 21.5335 | 21.4436 | 21.1775 | 21.5743 | 22.3094 | 21.7116 | 21.6061 |
| UPP1    | 20.2586 | 19.8512 | 20.1016 | 20.3481 | 20.1212 | 20.7684 | 20.0223 | 20.2424 | 20.4677 |
| UQCRB   | 20.3515 | 20.2821 | 20.3293 | 19.9755 | 20.0791 | 20.173  | 20.1786 | 20.2728 | 20.3991 |
| UQCRC1  | 22.651  | 22.458  | 22.461  | 22.3443 | 22.4673 | 22.7525 | 22.9413 | 22.6568 | 22.6481 |
| UQCRC2  | 22.0649 | 21.975  | 22.0208 | 21.8292 | 21.9126 | 22.0413 | 22.5358 | 22.1276 | 22.3493 |
| UQCRFS1 | 20.0818 | 19.9758 | 19.7808 | 20.3246 | 20.0148 | 20.0718 | 19.7826 | 19.9007 | 20.201  |
| UQCRQ   | 20.1039 | 19.0688 | 20.0337 | 19.862  | 19.8533 | 20.2826 | 20.5312 | 20.1743 | 20.2244 |
| URB1    | 17.4524 | 17.757  | 17.737  | 17.5633 | 17.5678 | 17.2515 | 17.4271 | 17.5456 | 17.4191 |
| URB2    | 18.4108 | 18.3768 | 18.3234 | 18.4455 | 17.838  | 17.835  | 18.16   | 18.5011 | 18.4545 |
| UROD    | 20.2499 | 19.2115 | 20.0886 | 20.0959 | 19.8903 | 20.4546 | 20.558  | 20.1962 | 20.3406 |
| USO1    | 20.4195 | 20.4167 | 20.5242 | 20.3453 | 20.2876 | 20.3703 | 20.9707 | 20.4956 | 20.5941 |
| USP10   | 20.409  | 20.2418 | 20.2085 | 20.0371 | 20.0178 | 20.1758 | 20.8688 | 20.281  | 20.6173 |
| USP11   | 19.1623 | 19.0562 | 18.9284 | 18.98   | 18.9185 | 18.4611 | 18.5039 | 18.8461 | 18.7594 |
| USP14   | 20.6388 | 20.0601 | 20.3844 | 20.4396 | 20.2499 | 19.6568 | 19.6561 | 19.7779 | 19.8818 |

|          |         |         |         |         |         |         |         |         |         |
|----------|---------|---------|---------|---------|---------|---------|---------|---------|---------|
| USP15    | 18.7856 | 18.5691 | 18.4709 | 18.1207 | 18.374  | 18.5416 | 19.3904 | 18.6514 | 18.535  |
| USP19    | 20.7025 | 20.2982 | 20.218  | 20.4504 | 20.3469 | 20.4948 | 20.3747 | 20.5339 | 20.6028 |
| USP39    | 19.1319 | 19.211  | 19.6278 | 19.5505 | 19.2206 | 19.0454 | 19.2954 | 19.245  | 19.4515 |
| USP4     | 17.612  | 17.3401 | 17.3901 | 17.4173 | 17.1122 | 17.1382 | 16.4488 | 17.1133 | 16.9808 |
| USP48    | 19.4652 | 18.7666 | 19.9033 | 18.9362 | 19.8144 | 17.8007 | 19.1296 | 19.9381 | 20.1419 |
| USP5     | 21.2662 | 21.2871 | 21.1056 | 21.202  | 20.9387 | 21.3482 | 21.6855 | 21.2511 | 21.5584 |
| USP7     | 20.3326 | 20.0616 | 20.0512 | 20.0149 | 20.031  | 20.2544 | 20.704  | 20.1659 | 20.2901 |
| USP8     | 16.7458 | 17.4519 | 17.625  | 17.7059 | 17.3377 | 17.3524 | 17.346  | 17.4828 | 17.2353 |
| USP9X    | 18.2102 | 18.3252 | 18.3573 | 17.86   | 18.0899 | 18.0346 | 18.5069 | 18.1173 | 18.4879 |
| UTP14A   | 18.586  | 18.5431 | 18.3055 | 17.8946 | 18.2225 | 17.8352 | 18.4384 | 18.3757 | 18.7462 |
| UTP15    | 19.2118 | 18.95   | 19.0933 | 18.8221 | 19.0156 | 18.7882 | 19.4568 | 19.0159 | 19.0757 |
| UTP18    | 19.8205 | 23.0259 | 19.755  | 19.727  | 19.7716 | 19.9607 | 19.892  | 19.5679 | 19.6096 |
| UTP20    | 17.3362 | 17.5854 | 17.3749 | 17.1184 | 17.1814 | 16.6737 | 17.1255 | 17.1619 | 16.9427 |
| UTP3     | 17.0611 | 16.0606 | 16.3568 | 16.2416 | 17.0553 | 16.389  | 14.2902 | 16.1541 | 15.8463 |
| UTP6     | 18.067  | 18.3622 | 17.2182 | 18.2309 | 18.1333 | 17.0415 | 17.6669 | 17.7815 | 17.7366 |
| VAC14    | 16.9374 | 16.8735 | 16.9649 | 18.2994 | 17.079  | 18.3295 | 16.5837 | 16.6656 | 16.6299 |
| VAMP3    | 18.6754 | 18.3576 | 18.1796 | 18.1764 | 17.8999 | 18.0598 | 16.8532 | 18.2137 | 17.9601 |
| VAMP7    | 19.5617 | 19.5241 | 19.6887 | 19.3686 | 19.6681 | 19.65   | 19.889  | 19.415  | 19.4184 |
| VAPA     | 20.98   | 20.7326 | 20.7145 | 20.7427 | 20.1743 | 20.6034 | 20.6905 | 20.6823 | 20.5509 |
| VAPB     | 18.9506 | 19.158  | 19.5634 | 19.2552 | 19.6704 | 20.1767 | 20.658  | 19.7125 | 19.8152 |
| VAR5     | 22.0488 | 21.6554 | 21.4658 | 21.5833 | 21.4114 | 21.2739 | 21.5756 | 21.3927 | 21.6579 |
| VASP     | 20.3224 | 20.1236 | 19.7642 | 20.046  | 19.6377 | 20.0079 | 19.7148 | 19.8104 | 19.9464 |
| VAT1     | 20.7205 | 20.7945 | 20.9643 | 20.6883 | 20.6647 | 21.0136 | 21.2568 | 20.8152 | 21.1259 |
| VBPI     | 20.8749 | 20.4456 | 20.8415 | 20.5414 | 20.6623 | 21.0906 | 21.0539 | 20.854  | 21.1202 |
| VCL      | 20.9458 | 20.7943 | 20.8581 | 21.0326 | 20.7886 | 21.0874 | 21.3831 | 21.2333 | 21.3905 |
| VCP      | 24.2158 | 24.185  | 24.0134 | 24.004  | 23.9099 | 23.8128 | 24.3408 | 24.0271 | 24.3074 |
| VDAC1    | 24.8531 | 24.771  | 24.6963 | 24.6253 | 24.6112 | 24.8091 | 25.0059 | 24.7092 | 24.9513 |
| VDAC2    | 23.7761 | 23.4687 | 23.6061 | 23.5817 | 23.4481 | 23.5037 | 23.7942 | 23.4786 | 23.669  |
| VDAC3    | 23.2691 | 22.9473 | 22.9878 | 22.8314 | 22.7414 | 22.7134 | 23.1515 | 22.8733 | 23.0137 |
| VIM      | 28.2667 | 28.2607 | 28.2699 | 28.0771 | 28.0242 | 28.0359 | 28.094  | 28.0866 | 28.2869 |
| VKORC1   | 20.8203 | 21.3159 | 21.0574 | 21.2239 | 21.001  | 20.8756 | 21.1699 | 20.8021 | 21.2232 |
| VKORC1L1 | 16.2905 | 17.7805 | 17.3814 | 17.6761 | 17.4272 | 17.7831 | 17.8053 | 17.529  | 17.5344 |
| VPRBP    | 18.0477 | 17.696  | 17.7635 | 17.8806 | 17.4699 | 17.4251 | 17.7062 | 18.1413 | 17.8495 |
| VPS11    | 18.5669 | 16.6866 | 16.3199 | 16.8107 | 16.4919 | 16.7908 | 16.6685 | 16.7777 | 16.5212 |
| VPS18    | 18.1434 | 17.929  | 17.6502 | 17.874  | 17.691  | 17.8511 | 18.0961 | 17.8628 | 17.9719 |
| VPS25    | 17.0102 | 17.1544 | 17.6514 | 17.5103 | 17.3748 | 16.629  | 17.467  | 17.6175 | 16.6214 |
| VPS26A   | 20.0795 | 20.1157 | 20.1478 | 19.9788 | 19.9863 | 20.0641 | 20.278  | 20.174  | 20.4018 |
| VPS29    | 20.2425 | 20.4443 | 20.2272 | 20.3195 | 20.1438 | 20.1821 | 20.4655 | 20.1463 | 20.6072 |
| VPS33A   | 17.2131 | 17.3106 | 17.4641 | 17.2349 | 16.9995 | 17.0538 | 17.6131 | 17.0406 | 16.8763 |
| VPS35    | 21.1978 | 21.226  | 21.0244 | 21.0427 | 21.0411 | 20.9093 | 21.3153 | 21.1183 | 21.3521 |
| VPS37B   | 18.8678 | 18.6719 | 18.0253 | 18.663  | 18.2927 | 18.7658 | 18.0848 | 18.2849 | 18.3633 |
| VPS45    | 17.9569 | 18.7234 | 17.9441 | 17.5675 | 17.9527 | 17.9264 | 18.2683 | 17.8705 | 17.5173 |
| VPS4A    | 19.0352 | 19.1595 | 19.2332 | 18.7304 | 18.7344 | 19.0671 | 19.3121 | 18.7729 | 19.0466 |
| VPS4B    | 20.6274 | 20.3791 | 20.4623 | 20.4116 | 20.1683 | 20.7958 | 20.5453 | 20.4898 | 20.3789 |
| VPS51    | 17.2105 | 17.1949 | 17.0608 | 17.1089 | 16.8972 | 16.0372 | 16.9202 | 16.7301 | 16.601  |
| VPS53    | 16.4198 | 17.0546 | 17.3476 | 17.0543 | 17.2167 | 17.9105 | 17.6433 | 17.2731 | 16.6863 |
| VRK1     | 18.883  | 18.8831 | 18.8685 | 18.9293 | 18.6913 | 18.8969 | 18.494  | 18.7607 | 18.8472 |
| VWA9     | 17.7875 | 17.4418 | 17.9928 | 17.6675 | 17.6558 | 17.8127 | 18.6861 | 18.0535 | 17.7023 |
| WAPAL    | 17.586  | 17.088  | 17.3993 | 17.747  | 17.6771 | 16.6095 | 17.1867 | 17.5054 | 17.111  |
| WARS     | 22.22   | 21.953  | 21.7455 | 21.7066 | 21.6778 | 22.3646 | 22.1672 | 22.1738 | 22.0697 |
| WASF2    | 18.3003 | 18.8432 | 18.2427 | 19.2158 | 18.4444 | 17.4672 | 17.2949 | 18.0959 | 18.0172 |
| WASL     | 16.3493 | 17.4115 | 17.5572 | 17.4111 | 17.0333 | 17.0665 | 17.022  | 16.7792 | 17.0376 |
| WBP11    | 20.4356 | 20.1258 | 20.2253 | 20.2137 | 20.0082 | 19.8003 | 20.1482 | 20.1238 | 20.018  |
| WBSCR16  | 19.0401 | 18.9883 | 18.9346 | 18.8744 | 18.8183 | 18.9637 | 19.3177 | 18.7835 | 19.181  |
| WBSCR22  | 18.9863 | 18.7529 | 18.5868 | 18.8025 | 18.6711 | 18.5992 | 18.3279 | 18.4693 | 18.8447 |
| WDHD1    | 19.1218 | 19.172  | 19.366  | 19.2447 | 18.9621 | 19.0503 | 19.6765 | 19.3019 | 19.6073 |

|         |         |         |         |         |         |         |         |         |         |
|---------|---------|---------|---------|---------|---------|---------|---------|---------|---------|
| WDR1    | 23.4884 | 23.173  | 23.2844 | 23.282  | 23.0479 | 23.0265 | 23.313  | 23.1004 | 23.1303 |
| WDR11   | 18.3335 | 17.934  | 17.9656 | 18.0282 | 18.195  | 17.5184 | 18.1495 | 17.9264 | 18.0146 |
| WDR12   | 20.2357 | 20.2235 | 20.0775 | 20.0695 | 19.7994 | 19.7237 | 20.1401 | 19.6812 | 19.9818 |
| WDR18   | 18.915  | 17.9638 | 18.6575 | 19.0987 | 19.0153 | 19.289  | 18.8628 | 18.8169 | 19.0393 |
| WDR26   | 17.634  | 18.0103 | 17.3242 | 17.8069 | 17.8124 | 17.5924 | 17.656  | 17.3817 | 17.552  |
| WDR3    | 19.3675 | 19.2144 | 19.4613 | 19.0671 | 19.279  | 18.7752 | 19.2206 | 19.1603 | 18.8076 |
| WDR36   | 19.4172 | 19.8259 | 19.974  | 19.567  | 19.7634 | 19.6746 | 20.4283 | 19.7572 | 19.5937 |
| WDR43   | 20.6443 | 20.2593 | 20.6577 | 20.4571 | 20.259  | 20.3132 | 20.883  | 20.6409 | 20.6905 |
| WDR46   | 17.804  | 17.8321 | 16.6013 | 16.8205 | 15.651  | 17.6377 | 16.898  | 17.4817 | 17.7044 |
| WDR5    | 19.5972 | 19.3948 | 19.4954 | 19.4423 | 19.2955 | 19.1126 | 19.3513 | 19.3844 | 19.3403 |
| WDR55   | 17.1076 | 17.1506 | 18.0016 | 17.6608 | 17.4073 | 17.3062 | 16.9997 | 16.9552 | 17.3252 |
| WDR6    | 18.8617 | 18.4212 | 18.5064 | 18.2859 | 18.099  | 18.1852 | 18.8199 | 18.6852 | 18.3722 |
| WDR61   | 20.9345 | 20.5506 | 20.4157 | 20.4627 | 20.4665 | 20.544  | 20.5741 | 20.5062 | 20.477  |
| WDR70   | 18.0931 | 18.2373 | 18.0424 | 18.0734 | 17.7199 | 17.7157 | 18.2331 | 17.9405 | 18.0319 |
| WDR73   | 16.0182 | 16.3325 | 16.0909 | 15.3036 | 15.8052 | 15.9052 | 16.0915 | 15.3107 | 15.8816 |
| WDR74   | 19.2996 | 19.1603 | 19.0371 | 19.5627 | 19.1162 | 19.4407 | 19.0597 | 19.2081 | 19.0319 |
| WDR75   | 19.5831 | 19.7436 | 19.8015 | 19.6775 | 19.5622 | 19.4096 | 20.079  | 19.8598 | 19.9085 |
| WDR77   | 22.0554 | 21.3595 | 21.4556 | 21.4363 | 21.2276 | 21.1427 | 21.4913 | 21.3119 | 21.6415 |
| WDR82   | 19.5086 | 18.8128 | 19.634  | 19.4398 | 19.4931 | 19.8146 | 20.3608 | 19.5753 | 19.3807 |
| WFS1    | 17.5738 | 17.4617 | 17.3647 | 17.2269 | 17.0092 | 16.4442 | 17.0195 | 16.9044 | 17.1886 |
| WNK1    | 18.8753 | 18.2075 | 18.5526 | 18.374  | 18.1045 | 18.0486 | 17.8396 | 18.2527 | 18.358  |
| WRNIP1  | 16.6125 | 17.5639 | 17.4524 | 16.6533 | 17.4282 | 17.2272 | 17.4852 | 17.2858 | 17.1848 |
| WTAP    | 17.0287 | 17.5327 | 17.6449 | 17.5957 | 17.635  | 17.6736 | 16.9085 | 17.3375 | 17.7319 |
| XAB2    | 18.9599 | 19.3572 | 19.0403 | 19.1947 | 19.0946 | 18.774  | 19.2708 | 19.323  | 19.4629 |
| XPNPEP1 | 19.5989 | 19.8001 | 19.8288 | 19.8214 | 19.5316 | 19.9227 | 19.6626 | 19.7819 | 19.8068 |
| XPNPEP3 | 17.917  | 18.0732 | 17.9819 | 18.1385 | 17.8259 | 17.4124 | 17.9105 | 17.9101 | 18.0445 |
| XPO1    | 22.727  | 22.6645 | 22.7684 | 22.7228 | 22.6331 | 22.423  | 22.6294 | 22.7014 | 22.5339 |
| XPO5    | 20.4129 | 20.2304 | 20.3241 | 20.1409 | 20.0469 | 19.9956 | 20.5709 | 20.2939 | 20.3199 |
| XPO7    | 20.3884 | 20.2138 | 19.9506 | 20.213  | 19.8643 | 19.7479 | 20.2203 | 20.0366 | 19.9909 |
| XPOT    | 20.2734 | 20.4772 | 20.3531 | 20.2836 | 20.3118 | 19.9093 | 20.6704 | 20.3185 | 20.4967 |
| XRCC1   | 20.362  | 20.0798 | 20.0649 | 20.0033 | 19.9005 | 20.0323 | 20.4305 | 20.0652 | 20.1878 |
| XRCC4   | 17.7163 | 16.0803 | 16.9776 | 16.8709 | 17.3004 | 17.3809 | 16.8599 | 17.2388 | 16.5499 |
| XRCC5   | 24.4728 | 24.2378 | 24.5728 | 24.6673 | 24.3525 | 24.2658 | 24.7595 | 24.0714 | 24.119  |
| XRCC6   | 24.5387 | 24.5776 | 24.4915 | 24.5184 | 24.3575 | 24.5112 | 24.562  | 24.4404 | 24.5803 |
| XRN2    | 21.696  | 21.8603 | 21.805  | 21.3991 | 21.6909 | 21.6986 | 22.1719 | 21.704  | 21.9013 |
| YARS    | 22.3007 | 22.5942 | 22.4622 | 22.3436 | 22.2414 | 22.2928 | 22.4044 | 22.3525 | 22.5577 |
| YARS2   | 20.4903 | 20.3109 | 20.2101 | 19.9656 | 19.783  | 20.0105 | 20.6277 | 20.09   | 20.2575 |
| YBX1    | 22.7798 | 20.126  | 22.3958 | 22.7439 | 22.5308 | 22.743  | 22.6046 | 22.3302 | 23.0276 |
| YBX3    | 20.0071 | 18.3297 | 19.9917 | 19.8511 | 19.3788 | 19.7047 | 19.8149 | 18.8978 | 20.1437 |
| YIPF3   | 19.0956 | 19.1675 | 18.7758 | 19.0757 | 18.4029 | 18.6849 | 17.8466 | 19.08   | 19.1671 |
| YIPF6   | 15.1916 | 17.3768 | 16.5726 | 17.6646 | 17.1154 | 16.4639 | 15.8594 | 16.8187 | 17.2362 |
| YKT6    | 21.7935 | 21.5789 | 21.409  | 21.7073 | 21.1421 | 21.1262 | 21.0641 | 21.1265 | 21.6165 |
| YLPM1   | 19.8726 | 19.3722 | 19.2341 | 19.5211 | 19.178  | 19.4361 | 19.4061 | 19.5056 | 19.7644 |
| YME1L1  | 19.0232 | 18.8224 | 19.2188 | 19.0547 | 18.8611 | 19.0178 | 19.3946 | 18.7775 | 19.1187 |
| YRDC    | 19.2668 | 19.4076 | 19.2445 | 18.9475 | 18.9453 | 19.4458 | 19.1455 | 19.1192 | 19.2944 |
| YTHDC1  | 17.5935 | 17.7264 | 18.155  | 18.2555 | 18.15   | 17.8784 | 18.1429 | 18.0595 | 18.2818 |
| YTHDF2  | 19.8331 | 19.683  | 19.8077 | 19.61   | 19.4284 | 18.9486 | 19.2499 | 19.5344 | 19.7464 |
| YWHAB   | 23.5091 | 23.7807 | 23.2521 | 23.5457 | 23.341  | 23.3748 | 23.2117 | 23.3299 | 23.7978 |
| YWHAE   | 23.8671 | 21.6069 | 23.4823 | 23.8023 | 23.5497 | 23.2601 | 23.3819 | 23.4485 | 23.6267 |
| YWHAG   | 22.6495 | 22.6608 | 22.7458 | 22.866  | 22.874  | 22.8882 | 23.3169 | 22.8492 | 23.304  |
| YWHAH   | 21.9893 | 21.795  | 21.9675 | 22.2023 | 21.968  | 22.0103 | 22.006  | 21.9133 | 22.3926 |
| YWHAQ   | 23.363  | 23.4546 | 23.1351 | 23.0683 | 23.2358 | 22.3561 | 22.6517 | 22.9234 | 23.2239 |
| YWHAZ   | 25.8311 | 25.6109 | 25.5823 | 25.5654 | 25.4642 | 25.6354 | 25.8019 | 25.6191 | 25.7348 |
| ZBTB34  | 20.9245 | 20.9783 | 20.5921 | 19.9046 | 20.8454 | 19.9485 | 20.7082 | 19.7684 | 19.9032 |
| ZC3H11A | 18.8294 | 17.923  | 18.4613 | 18.7424 | 18.3746 | 18.5975 | 18.5551 | 18.8151 | 18.8347 |
| ZC3H13  | 18.5452 | 17.8999 | 17.3067 | 17.5128 | 17.0171 | 17.1017 | 17.0201 | 17.2697 | 17.1957 |

|          |         |         |         |         |         |         |         |         |         |
|----------|---------|---------|---------|---------|---------|---------|---------|---------|---------|
| ZC3H14   | 19.1089 | 18.7952 | 19.4867 | 19.4866 | 19.1203 | 18.8756 | 18.8463 | 19.0418 | 19.259  |
| ZC3H15   | 20.0961 | 19.8633 | 19.9314 | 19.7064 | 19.6424 | 19.8093 | 19.887  | 19.7801 | 20.0009 |
| ZC3H18   | 18.257  | 17.0091 | 17.5848 | 18.4072 | 17.8064 | 18.0999 | 17.644  | 17.8705 | 18.3776 |
| ZC3H4    | 19.226  | 17.2042 | 17.028  | 17.0375 | 16.9785 | 17.5006 | 16.8288 | 17.5334 | 17.5913 |
| ZC3H7A   | 16.7857 | 16.6396 | 16.5635 | 16.132  | 16.0366 | 16.2699 | 17.204  | 16.6183 | 16.9169 |
| ZC3HAV1  | 20.2763 | 20.2058 | 20.4008 | 20.0183 | 19.9357 | 20.186  | 20.3015 | 20.0155 | 20.1172 |
| ZCCHC8   | 18.4423 | 20.5439 | 17.3057 | 17.3411 | 17.1284 | 17.0152 | 18.3881 | 17.4952 | 17.8055 |
| ZFPL1    | 19.0188 | 19.1488 | 19.43   | 19.0083 | 19.0937 | 19.0747 | 19.2508 | 19.2649 | 19.2569 |
| ZFR      | 19.5689 | 19.5546 | 19.5257 | 19.4344 | 19.196  | 19.5042 | 19.8193 | 19.3754 | 19.557  |
| ZGPAT    | 20.0178 | 20.2696 | 20.0264 | 20.47   | 19.9716 | 19.4028 | 19.1606 | 19.5368 | 19.9599 |
| ZMPSTE24 | 21.1682 | 21.0984 | 21.0897 | 21.0581 | 20.7959 | 20.5691 | 20.8617 | 20.7521 | 20.9382 |
| ZMYND8   | 18.5238 | 18.4842 | 18.4492 | 18.441  | 18.3716 | 18.4959 | 18.7452 | 18.5312 | 18.1964 |
| ZNF207   | 21.0543 | 21.025  | 21.0428 | 21.4335 | 21.0265 | 20.9019 | 21.1981 | 21.2108 | 21.4887 |
| ZNF259   | 19.8917 | 17.5371 | 18.9154 | 19.7361 | 19.1106 | 20.0778 | 19.5712 | 19.8839 | 19.9358 |
| ZNF326   | 19.6409 | 18.4734 | 19.5677 | 19.4798 | 19.4868 | 19.5032 | 19.5748 | 19.264  | 19.6355 |
| ZNF622   | 19.5908 | 19.4509 | 19.6172 | 19.6629 | 19.5759 | 19.9082 | 19.3399 | 19.654  | 19.4872 |
| ZNF638   | 17.4763 | 17.5887 | 17.6086 | 17.2928 | 17.2606 | 17.4795 | 17.6701 | 17.5963 | 17.8375 |
| ZRANB2   | 19.8365 | 20.176  | 19.8562 | 19.9823 | 19.6859 | 20.3254 | 20.4938 | 19.9212 | 20.2134 |
| ZYX      | 22.4171 | 21.5646 | 22.3421 | 22.5041 | 22.3395 | 22.978  | 23.0834 | 22.639  | 22.8275 |
